# Supplementary material
Source: PubMed Central journal article supplement (PMC2742434)
Supplement: M800354-MCP200_1.pdf [file M800354-MCP200_1.pdf]

| Domain ID A | Domain Name A | Domain ID B | Domain Name B   | F        |
|-------------|---------------|-------------|-----------------|----------|
| PF02134     | UBACT         | PF00179     | UQ_con          | 1658.343 |
| PF00172     | Zn_clus       | PF00083     | Sugar_tr        | 552.7811 |
| PF09034     | TRADD_N       | PF00917     | MATH            | 552.7811 |
| PF05456     | eIF_4EBP      | PF01652     | IF4E            | 552.7811 |
| PF02518     | HATPase_c     | PF01627     | Hpt             | 414.5858 |
| PF02201     | SWIB          | PF08563     | P53_TAD         | 345.4882 |
| PF00993     | MHC_II_alpha  | PF09307     | MHC2-interact   | 331.6686 |
| PF00653     | BIR           | PF00656     | Peptidase_C14   | 331.6686 |
| PF00714     | IFN-gamma     | PF07140     | IFNGR1          | 331.6686 |
| PF02205     | WH2           | PF00022     | Actin           | 315.8749 |
| PF00726     | IL10          | PF01108     | Tissue_fac      | 285.0277 |
| PF06384     | ICAT          | PF00514     | Arm             | 207.2929 |
| PF00646     | F-box         | PF00514     | Arm             | 207.2929 |
| PF00619     | CARD          | PF00656     | Peptidase_C14   | 173.3722 |
| PF00307     | CH            | PF00022     | Actin           | 165.8343 |
| PF00931     | NB-ARC        | PF00619     | CARD            | 150.7585 |
| PF00219     | IGFBP         | PF00049     | Insulin         | 142.1437 |
| PF00112     | Peptidase_C1  | PF00086     | Thyroglobulin_1 | 138.1953 |
| PF00758     | EPO_TPO       | PF09067     | EpoR_lig-bind   | 138.1953 |
| PF00102     | Y_phosphatase | PF00514     | Arm             | 125.6321 |
| PF00531     | Death         | PF00917     | MATH            | 114.3685 |
| PF05806     | Noggin        | PF00019     | TGF_beta        | 103.6465 |
| PF00129     | MHC_I         | PF00059     | Lectin_C        | 99.21712 |
| PF00051     | Kringle       | PF00024     | PAN_1           | 92.13018 |
| PF00079     | Serpin        | PF00051     | Kringle         | 92.13018 |
| PF00992     | Troponin      | PF00036     | efhand          | 78.96872 |
| PF00514     | Arm           | PF00028     | Cadherin        | 77.73484 |
| PF00514     | Arm           | PF01049     | Cadherin_C      | 77.73484 |
| PF00019     | TGF_beta      | PF08917     | ecTbetaR2       | 77.73484 |
| PF00025     | Arf           | PF05216     | UNC-50          | 77.73484 |
| PF00917     | MATH          | PF00097     | zf-C3HC4        | 72.10188 |
| PF00503     | G-alpha       | PF00211     | Guanylate_cyc   | 70.16067 |
| PF00229     | TNF           | PF09257     | BCMA-Tall_bind  | 69.09763 |
| PF00229     | TNF           | PF09305     | TACI-CRD2       | 69.09763 |
| PF00020     | TNFR_c6       | PF00917     | MATH            | 66.33373 |
| PF00019     | TGF_beta      | PF01064     | Activin_recp    | 65.46092 |
| PF00400     | WD40          | PF02985     | HEAT            | 64.49113 |
| PF00615     | RGS           | PF00503     | G-alpha         | 63.78243 |
| PF00071     | Ras           | PF02196     | RBD             | 63.45701 |
| PF00084     | Sushi         | PF07678     | A2M_comp        | 60.30339 |
| PF02262     | Cbl_N         | PF00017     | SH2             | 57.6815  |
| PF02761     | Cbl_N2        | PF00017     | SH2             | 57.6815  |
| PF00071     | Ras           | PF00794     | PI3K_rbd        | 50.76561 |
| PF00621     | RhoGEF        | PF00071     | Ras             | 48.03627 |
| PF00079     | Serpin        | PF00089     | Trypsin         | 46.42618 |
| PF00229     | TNF           | PF00020     | TNFR_c6         | 43.53151 |

|         |               |         |                 |          |
|---------|---------------|---------|-----------------|----------|
| PF00229 | TNF           | PF09256 | BaffR-Tall_bind | 43.18602 |
| PF00071 | Ras           | PF00786 | PBD             | 43.07385 |
| PF00618 | RasGEF_N      | PF00071 | Ras             | 42.30467 |
| PF00627 | UBA           | PF00018 | SH3_1           | 39.48436 |
| PF00071 | Ras           | PF06367 | Drf_FH3         | 39.48436 |
| PF00071 | Ras           | PF06371 | Drf_GBD         | 39.48436 |
| PF00008 | EGF           | PF01030 | Recep_L_domain  | 38.61338 |
| PF00089 | Trypsin       | PF00024 | PAN_1           | 38.49153 |
| PF00617 | RasGEF        | PF00071 | Ras             | 37.60415 |
| PF02762 | Cbl_N3        | PF00017 | SH2             | 37.49298 |
| PF00089 | Trypsin       | PF08702 | Fib_alpha       | 35.2839  |
| PF00050 | Kazal_1       | PF00019 | TGF_beta        | 34.54882 |
| PF00320 | GATA          | PF00096 | zf-C2H2         | 34.54882 |
| PF02985 | HEAT          | PF01049 | Cadherin_C      | 34.54882 |
| PF00071 | Ras           | PF08912 | Rho_Binding     | 33.84374 |
| PF00620 | RhoGAP        | PF00071 | Ras             | 33.84374 |
| PF00071 | Ras           | PF02185 | HR1             | 33.84374 |
| PF00039 | fn1           | PF00040 | fn2             | 33.16686 |
| PF01064 | Activin_recp  | PF03166 | MH2             | 32.73046 |
| PF00619 | CARD          | PF00531 | Death           | 31.19141 |
| PF00236 | Hormone_6     | PF00560 | LRR_1           | 29.61327 |
| PF00400 | WD40          | PF00096 | zf-C2H2         | 27.63905 |
| PF01576 | Myosin_tail_1 | PF00036 | efhand          | 26.32291 |
| PF01582 | TIR           | PF00531 | Death           | 26.20945 |
| PF00001 | 7tm_1         | PF00503 | G-alpha         | 25.6596  |
| PF00560 | LRR_1         | PF01582 | TIR             | 24.67773 |
| PF00097 | zf-C3HC4      | PF00240 | ubiquitin       | 24.03396 |
| PF00069 | Pkinase       | PF00514 | Arm             | 23.70637 |
| PF00169 | PH            | PF01412 | ArfGap          | 23.69062 |
| PF00169 | PH            | PF00071 | Ras             | 23.20714 |
| PF00048 | IL8           | PF00001 | 7tm_1           | 22.10019 |
| PF00779 | BTK           | PF00169 | PH              | 21.7164  |
| PF01403 | Sema          | PF01833 | TIG             | 21.63056 |
| PF00103 | Hormone_1     | PF00041 | fn3             | 21.53693 |
| PF00489 | IL6           | PF00041 | fn3             | 21.53693 |
| PF00758 | EPO_TPO       | PF00041 | fn3             | 21.53693 |
| PF07645 | EGF_CA        | PF00683 | TB              | 20.72929 |
| PF01363 | FYVE          | PF00071 | Ras             | 20.30624 |
| PF00435 | Spectrin      | PF00036 | efhand          | 19.74218 |
| PF00018 | SH3_1         | PF01412 | ArfGap          | 19.74218 |
| PF00023 | Ank           | PF00097 | zf-C3HC4        | 19.66415 |
| PF00001 | 7tm_1         | PF00631 | G-gamma         | 19.06142 |
| PF01437 | PSI           | PF01833 | TIG             | 18.80919 |
| PF07654 | C1-set        | PF00059 | Lectin_C        | 18.76726 |
| PF00243 | NGF           | PF07679 | I-set           | 18.61216 |
| PF00149 | Metallophos   | PF00027 | cNMP_binding    | 18.42604 |
| PF00641 | zf-RanBP      | PF00097 | zf-C3HC4        | 18.02547 |

|         |               |         |                |          |
|---------|---------------|---------|----------------|----------|
| PF00017 | SH2           | PF00387 | PI-PLC-Y       | 18.02547 |
| PF00036 | efhand        | PF00071 | Ras            | 17.72767 |
| PF00917 | MATH          | PF00069 | Pkinase        | 17.64195 |
| PF00018 | SH3_1         | PF00071 | Ras            | 17.32477 |
| PF00167 | FGF           | PF07679 | I-set          | 16.75094 |
| PF00433 | Pkinase_C     | PF02196 | RBD            | 16.36523 |
| PF00341 | PDGF          | PF07686 | V-set          | 16.2431  |
| PF00069 | Pkinase       | PF00870 | P53            | 16.17179 |
| PF00616 | RasGAP        | PF00071 | Ras            | 16.03125 |
| PF00017 | SH2           | PF01017 | STAT_alpha     | 16.02264 |
| PF00017 | SH2           | PF02864 | STAT_bind      | 16.02264 |
| PF00047 | ig            | PF00514 | Arm            | 15.72567 |
| PF00071 | Ras           | PF00454 | PI3_PI4_kinase | 15.62019 |
| PF00017 | SH2           | PF00388 | PI-PLC-X       | 15.4504  |
| PF00340 | IL1           | PF00047 | ig             | 15.24913 |
| PF00341 | PDGF          | PF00047 | ig             | 15.01087 |
| PF01403 | Sema          | PF01437 | PSI            | 14.42038 |
| PF02412 | TSP_3         | PF07645 | EGF_CA         | 13.81953 |
| PF00169 | PH            | PF00387 | PI-PLC-Y       | 13.81953 |
| PF01833 | TIG           | PF00071 | Ras            | 13.2432  |
| PF00627 | UBA           | PF00069 | Pkinase        | 13.23146 |
| PF00069 | Pkinase       | PF02985 | HEAT           | 13.23146 |
| PF00023 | Ank           | PF01833 | TIG            | 13.10943 |
| PF00433 | Pkinase_C     | PF00595 | PDZ            | 12.27392 |
| PF00017 | SH2           | PF00620 | RhoGAP         | 12.01698 |
| PF00169 | PH            | PF00388 | PI-PLC-X       | 11.84531 |
| PF00102 | Y_phosphatase | PF02189 | ITAM           | 11.59681 |
| PF00167 | FGF           | PF00047 | ig             | 11.43685 |
| PF00102 | Y_phosphatase | PF00017 | SH2            | 11.36151 |
| PF00017 | SH2           | PF00168 | C2             | 10.57494 |
| PF00020 | TNFR_c6       | PF00531 | Death          | 10.29317 |
| PF00053 | Laminin_EGF   | PF00050 | Kazal_1        | 9.960019 |
| PF00018 | SH3_1         | PF00620 | RhoGAP         | 9.87109  |
| PF00018 | SH3_1         | PF00307 | CH             | 9.87109  |
| PF00017 | SH2           | PF00640 | PID            | 9.613584 |
| PF00169 | PH            | PF00307 | CH             | 9.476247 |
| PF02210 | Laminin_G_2   | PF00047 | ig             | 8.986096 |
| PF00102 | Y_phosphatase | PF00018 | SH3_1          | 8.973719 |
| PF00018 | SH3_1         | PF00621 | RhoGEF         | 8.915824 |
| PF00017 | SH2           | PF00621 | RhoGEF         | 8.838295 |
| PF00069 | Pkinase       | PF00240 | ubiquitin      | 8.820974 |
| PF00129 | MHC_I         | PF00047 | ig             | 8.797577 |
| PF00617 | RasGEF        | PF00036 | efhand         | 8.774303 |
| PF00036 | efhand        | PF00149 | Metallophos    | 8.774303 |
| PF00047 | ig            | PF05790 | C2-set         | 8.577637 |
| PF00018 | SH3_1         | PF02205 | WH2            | 8.460935 |
| PF00236 | Hormone_6     | PF07686 | V-set          | 8.250464 |

|         |               |         |                |           |
|---------|---------------|---------|----------------|-----------|
| PF02412 | TSP_3         | PF00008 | EGF            | 8. 129133 |
| PF05735 | TSP_C         | PF00008 | EGF            | 8. 129133 |
| PF00169 | PH            | PF00168 | C2             | 7. 896872 |
| PF07686 | V-set         | PF01030 | Recep_L_domain | 7. 73481  |
| PF00560 | LRR_1         | PF00041 | fn3            | 7. 691759 |
| PF00017 | SH2           | PF00169 | PH             | 7. 622199 |
| PF00129 | MHC_I         | PF07686 | V-set          | 7. 615813 |
| PF00993 | MHC_II_alpha  | PF07686 | V-set          | 7. 425417 |
| PF00786 | PBD           | PF00069 | Pkinase        | 7. 217161 |
| PF00779 | BTK           | PF00017 | SH2            | 7. 210188 |
| PF00047 | ig            | PF00059 | Lectin_C       | 6. 989186 |
| PF00993 | MHC_II_alpha  | PF00047 | ig             | 6. 86211  |
| PF00047 | ig            | PF00629 | MAM            | 6. 86211  |
| PF00788 | RA            | PF00071 | Ras            | 6. 768748 |
| PF00169 | PH            | PF00036 | efhand         | 6. 768748 |
| PF00621 | RhoGEF        | PF00618 | RasGEF_N       | 6. 686868 |
| PF00786 | PBD           | PF00169 | PH             | 6. 461077 |
| PF01462 | LRRNT         | PF00047 | ig             | 6. 353805 |
| PF00069 | Pkinase       | PF00027 | cNMP_binding   | 6. 174682 |
| PF00008 | EGF           | PF00023 | Ank            | 5. 912097 |
| PF07654 | C1-set        | PF07686 | V-set          | 5. 729489 |
| PF07654 | C1-set        | PF00047 | ig             | 5. 718425 |
| PF00071 | Ras           | PF00564 | PB1            | 5. 640623 |
| PF00017 | SH2           | PF00130 | C1_1           | 5. 627464 |
| PF07686 | V-set         | PF00757 | Furin-like     | 5. 500309 |
| PF00069 | Pkinase       | PF00168 | C2             | 5. 439601 |
| PF00069 | Pkinase       | PF00170 | bZIP_1         | 5. 390596 |
| PF00018 | SH3_1         | PF00412 | LIM            | 5. 384231 |
| PF00102 | Y_phosphatase | PF00069 | Pkinase        | 5. 346045 |
| PF00102 | Y_phosphatase | PF07714 | Pkinase_Tyr    | 5. 346045 |
| PF00089 | Trypsin       | PF01403 | Sema           | 5. 292585 |
| PF00097 | zf-C3HC4      | PF00069 | Pkinase        | 5. 177529 |
| PF00069 | Pkinase       | PF01094 | ANF_receptor   | 5. 040557 |
| PF00018 | SH3_1         | PF00618 | RasGEF_N       | 4. 935545 |
| PF00435 | Spectrin      | PF00018 | SH3_1          | 4. 935545 |
| PF00595 | PDZ           | PF00102 | Y_phosphatase  | 4. 711202 |
| PF08205 | C2-set_2      | PF07686 | V-set          | 4. 583591 |
| PF00782 | DSPc          | PF00069 | Pkinase        | 4. 580121 |
| PF00096 | zf-C2H2       | PF00097 | zf-C3HC4       | 4. 506367 |
| PF01404 | Ephrin_lbd    | PF00069 | Pkinase        | 4. 410487 |
| PF00515 | TPR_1         | PF00069 | Pkinase        | 4. 410487 |
| PF00069 | Pkinase       | PF00104 | Hormone_recep  | 4. 410487 |
| PF00069 | Pkinase       | PF00105 | zf-C4          | 4. 410487 |
| PF00069 | Pkinase       | PF00022 | Actin          | 4. 410487 |
| PF00069 | Pkinase       | PF02234 | CDI            | 4. 410487 |
| PF00069 | Pkinase       | PF00571 | CBS            | 4. 410487 |
| PF00069 | Pkinase       | PF00076 | RRM_1          | 4. 410487 |

|         |               |         |                |           |
|---------|---------------|---------|----------------|-----------|
| PF00069 | Pkinase       | PF09080 | K-cyclin_vir_C | 4. 410487 |
| PF00069 | Pkinase       | PF09241 | Herp-Cyclin    | 4. 410487 |
| PF00018 | SH3_1         | PF00617 | RasGEF         | 4. 387151 |
| PF00041 | fn3           | PF00017 | SH2            | 4. 307385 |
| PF00560 | LRR_1         | PF00047 | ig             | 4. 084589 |
| PF00018 | SH3_1         | PF00169 | PH             | 3. 948436 |
| PF00018 | SH3_1         | PF00168 | C2             | 3. 948436 |
| PF00051 | Kringle       | PF00089 | Trypsin        | 3. 920433 |
| PF00017 | SH2           | PF00018 | SH3_1          | 3. 776765 |
| PF00069 | Pkinase       | PF00169 | PH             | 3. 717411 |
| PF00560 | LRR_1         | PF00071 | Ras            | 3. 626115 |
| PF00780 | CNH           | PF00069 | Pkinase        | 3. 60858  |
| PF00069 | Pkinase       | PF00412 | LIM            | 3. 60858  |
| PF00168 | C2            | PF00595 | PDZ            | 3. 454882 |
| PF00581 | Rhodanese     | PF00069 | Pkinase        | 3. 430379 |
| PF00017 | SH2           | PF02189 | ITAM           | 3. 327779 |
| PF02196 | RBD           | PF00069 | Pkinase        | 3. 307865 |
| PF02518 | HATPase_c     | PF00069 | Pkinase        | 3. 307865 |
| PF00018 | SH3_1         | PF02181 | FH2            | 3. 290363 |
| PF00018 | SH3_1         | PF00564 | PB1            | 3. 290363 |
| PF00102 | Y_phosphatase | PF00041 | fn3            | 3. 26317  |
| PF00169 | PH            | PF00023 | Ank            | 3. 230539 |
| PF07686 | V-set         | PF00092 | VWA            | 3. 093924 |
| PF00069 | Pkinase       | PF00211 | Guanylate_cyc  | 3. 087341 |
| PF00169 | PH            | PF00621 | RhoGEF         | 3. 056854 |
| PF00069 | Pkinase       | PF00096 | zf-C2H2        | 3. 03221  |
| PF00008 | EGF           | PF00041 | fn3            | 2. 744902 |
| PF00059 | Lectin_C      | PF00008 | EGF            | 2. 709711 |
| PF00008 | EGF           | PF00051 | Kringle        | 2. 709711 |
| PF00069 | Pkinase       | PF00621 | RhoGEF         | 2. 703202 |
| PF00018 | SH3_1         | PF00023 | Ank            | 2. 692116 |
| PF00041 | fn3           | PF01030 | Recep_L_domain | 2. 692116 |
| PF00169 | PH            | PF00617 | RasGEF         | 2. 632291 |
| PF00089 | Trypsin       | PF09064 | Tme5_EGF_like  | 2. 520278 |
| PF00069 | Pkinase       | PF00989 | PAS            | 2. 520278 |
| PF00616 | RasGAP        | PF00169 | PH             | 2. 493749 |
| PF07686 | V-set         | PF00009 | GTP_EFTU       | 2. 475139 |
| PF00071 | Ras           | PF00069 | Pkinase        | 2. 430268 |
| PF00008 | EGF           | PF00089 | Trypsin        | 2. 421444 |
| PF03623 | Focal_AT      | PF00017 | SH2            | 2. 403396 |
| PF00041 | fn3           | PF00757 | Furin-like     | 2. 392992 |
| PF00169 | PH            | PF00595 | PDZ            | 2. 220995 |
| PF00659 | POLO_box      | PF00069 | Pkinase        | 2. 205244 |
| PF00072 | Response_reg  | PF00069 | Pkinase        | 2. 205244 |
| PF00069 | Pkinase       | PF00554 | RHD            | 2. 205244 |
| PF00069 | Pkinase       | PF00134 | Cyclin_N       | 2. 205244 |
| PF00069 | Pkinase       | PF02984 | Cyclin_C       | 2. 205244 |

|         |                |         |               |           |
|---------|----------------|---------|---------------|-----------|
| PF00595 | PDZ            | PF00071 | Ras           | 2. 115234 |
| PF00018 | SH3_1          | PF00616 | RasGAP        | 2. 078124 |
| PF00069 | Pkinase        | PF00017 | SH2           | 2. 071011 |
| PF07714 | Pkinase_Tyr    | PF00017 | SH2           | 2. 071011 |
| PF09064 | Tme5_EGF_like  | PF07645 | EGF_CA        | 1. 974218 |
| PF00069 | Pkinase        | PF03166 | MH2           | 1. 929588 |
| PF00047 | ig             | PF03921 | ICAM_N        | 1. 906142 |
| PF00025 | Arf            | PF00069 | Pkinase       | 1. 860674 |
| PF00069 | Pkinase        | PF00018 | SH3_1         | 1. 837703 |
| PF07714 | Pkinase_Tyr    | PF00018 | SH3_1         | 1. 837703 |
| PF00017 | SH2            | PF02196 | RBD           | 1. 802547 |
| PF00018 | SH3_1          | PF00786 | PBD           | 1. 794744 |
| PF00069 | Pkinase        | PF00125 | Histone       | 1. 764195 |
| PF00069 | Pkinase        | PF00005 | ABC_tran      | 1. 764195 |
| PF00433 | Pkinase_C      | PF00069 | Pkinase       | 1. 740982 |
| PF00047 | ig             | PF00102 | Y_phosphatase | 1. 732856 |
| PF07686 | V-set          | PF00017 | SH2           | 1. 721836 |
| PF00047 | ig             | PF00017 | SH2           | 1. 690665 |
| PF00610 | DEP            | PF00069 | Pkinase       | 1. 653933 |
| PF00008 | EGF            | PF00069 | Pkinase       | 1. 599883 |
| PF00025 | Arf            | PF00071 | Ras           | 1. 586425 |
| PF00069 | Pkinase        | PF00595 | PDZ           | 1. 516105 |
| PF00047 | ig             | PF00018 | SH3_1         | 1. 497683 |
| PF00008 | EGF            | PF07686 | V-set         | 1. 334634 |
| PF00047 | ig             | PF07686 | V-set         | 1. 280244 |
| PF00024 | PAN_1          | PF00069 | Pkinase       | 1. 20286  |
| PF00069 | Pkinase        | PF00619 | CARD          | 1. 20286  |
| PF00089 | Trypsin        | PF00084 | Sushi         | 1. 17613  |
| PF07645 | EGF_CA         | PF00089 | Trypsin       | 1. 17613  |
| PF00008 | EGF            | PF00047 | ig            | 1. 12126  |
| PF02185 | HR1            | PF00069 | Pkinase       | 1. 102622 |
| PF00069 | Pkinase        | PF00435 | Spectrin      | 1. 102622 |
| PF07686 | V-set          | PF01437 | PSI           | 1. 076147 |
| PF00069 | Pkinase        | PF00611 | FCH           | 0. 980108 |
| PF00041 | fn3            | PF00069 | Pkinase       | 0. 973744 |
| PF00008 | EGF            | PF00053 | Laminin_EGF   | 0. 878825 |
| PF00089 | Trypsin        | PF01826 | TIL           | 0. 860583 |
| PF01030 | Recep_L_domain | PF00069 | Pkinase       | 0. 826966 |
| PF00017 | SH2            | PF00433 | Pkinase_C     | 0. 758967 |
| PF00757 | Furin-like     | PF00069 | Pkinase       | 0. 735081 |
| PF00498 | FHA            | PF00069 | Pkinase       | 0. 735081 |
| PF00069 | Pkinase        | PF00564 | PB1           | 0. 735081 |
| PF00069 | Pkinase        | PF00023 | Ank           | 0. 60143  |
| PF00047 | ig             | PF07679 | I-set         | 0. 462095 |
| PF07679 | I-set          | PF00041 | fn3           | 0. 435089 |
| PF00069 | Pkinase        | PF00618 | RasGEF_N      | 0. 367541 |
| PF07686 | V-set          | PF00041 | fn3           | 0. 321447 |

|         |                 |         |               |          |
|---------|-----------------|---------|---------------|----------|
| PF00047 | ig              | PF00041 | fn3           | 0.297061 |
| PF00036 | efhand          | PF00069 | Pkinase       | 0.210023 |
| PF00020 | TNFR_c6         | PF00069 | Pkinase       | 0.176419 |
| PF07679 | I-set           | PF00069 | Pkinase       | 0.133651 |
| PF00047 | ig              | PF00069 | Pkinase       | 0.121669 |
| PF00008 | EGF             | PF00008 | EGF           | 0        |
| PF00053 | Laminin_EGF     | PF00053 | Laminin_EGF   | 0        |
| PF04863 | EGF_alliinase   | PF04863 | EGF_alliinase | 0        |
| PF07645 | EGF_CA          | PF00008 | EGF           | 0        |
| PF07645 | EGF_CA          | PF07645 | EGF_CA        | 0        |
| PF00069 | Pkinase         | PF00069 | Pkinase       | 0        |
| PF00169 | PH              | PF00169 | PH            | 0        |
| PF07714 | Pkinase_Tyr     | PF07714 | Pkinase_Tyr   | 0        |
| PF00017 | SH2             | PF00017 | SH2           | 0        |
| PF00019 | TGF_beta        | PF00019 | TGF_beta      | 0        |
| PF00036 | efhand          | PF00036 | efhand        | 0        |
| PF00097 | zf-C3HC4        | PF00097 | zf-C3HC4      | 0        |
| PF00899 | ThiF            | PF00899 | ThiF          | 0        |
| PF03165 | MH1             | PF03165 | MH1           | 0        |
| PF03166 | MH2             | PF03166 | MH2           | 0        |
| PF01392 | Fz              | PF01392 | Fz            | 0        |
| PF00041 | fn3             | PF00041 | fn3           | 0        |
| PF07648 | Kazal_2         | PF07648 | Kazal_2       | 0        |
| PF00025 | Arf             | PF00025 | Arf           | 0        |
| PF00071 | Ras             | PF00071 | Ras           | 0        |
| PF01926 | MMR_HSR1        | PF01926 | MMR_HSR1      | 0        |
| PF00009 | GTP_EFTU        | PF00009 | GTP_EFTU      | 0        |
| PF00617 | RasGEF          | PF00617 | RasGEF        | 0        |
| PF00618 | RasGEF_N        | PF00617 | RasGEF        | 0        |
| PF00618 | RasGEF_N        | PF00618 | RasGEF_N      | 0        |
| PF00621 | RhoGEF          | PF00621 | RhoGEF        | 0        |
| PF01826 | TIL             | PF01826 | TIL           | 0        |
| PF00018 | SH3_1           | PF00018 | SH3_1         | 0        |
| PF08347 | CTNNB1_binding  | PF00514 | Arm           | 0        |
| PF00047 | ig              | PF00047 | ig            | 0        |
| PF00084 | Sushi           | PF00084 | Sushi         | 0        |
| PF00089 | Trypsin         | PF00089 | Trypsin       | 0        |
| PF00656 | Peptidase_C14   | PF00656 | Peptidase_C14 | 0        |
| PF07686 | V-set           | PF07686 | V-set         | 0        |
| PF01404 | Ephrin_lbd      | PF00812 | Ephrin        | 0        |
| PF00531 | Death           | PF00069 | Pkinase       | 0        |
| PF00531 | Death           | PF00531 | Death         | 0        |
| PF01335 | DED             | PF01335 | DED           | 0        |
| PF06617 | M-inducer_phosp | PF00069 | Pkinase       | 0        |
| PF01403 | Sema            | PF01403 | Sema          | 0        |
| PF01437 | PSI             | PF01437 | PSI           | 0        |
| PF01582 | TIR             | PF01582 | TIR           | 0        |

|         |              |         |              |   |
|---------|--------------|---------|--------------|---|
| PF07679 | I-set        | PF07679 | I-set        | 0 |
| PF00024 | PAN_1        | PF00024 | PAN_1        | 0 |
| PF00051 | Kringle      | PF00051 | Kringle      | 0 |
| PF00028 | Cadherin     | PF00028 | Cadherin     | 0 |
| PF01049 | Cadherin_C   | PF00028 | Cadherin     | 0 |
| PF01049 | Cadherin_C   | PF01049 | Cadherin_C   | 0 |
| PF07654 | C1-set       | PF07654 | C1-set       | 0 |
| PF00594 | Gla          | PF00008 | EGF          | 0 |
| PF00594 | Gla          | PF00089 | Trypsin      | 0 |
| PF00594 | Gla          | PF00059 | Lectin_C     | 0 |
| PF00594 | Gla          | PF00051 | Kringle      | 0 |
| PF00594 | Gla          | PF00594 | Gla          | 0 |
| PF00057 | Ldl_recept_a | PF00057 | Ldl_recept_a | 0 |
| PF00090 | TSP_1        | PF00057 | Ldl_recept_a | 0 |
| PF00090 | TSP_1        | PF00090 | TSP_1        | 0 |
| PF00564 | PB1          | PF00564 | PB1          | 0 |
| PF01636 | APH          | PF00023 | Ank          | 0 |
| PF01636 | APH          | PF01636 | APH          | 0 |
| PF00619 | CARD         | PF00619 | CARD         | 0 |
| PF02174 | IRS          | PF00017 | SH2          | 0 |
| PF00040 | fn2          | PF00040 | fn2          | 0 |
| PF08205 | C2-set_2     | PF08205 | C2-set_2     | 0 |
| PF02201 | SWIB         | PF02201 | SWIB         | 0 |
| PF00207 | A2M          | PF01759 | NTR          | 0 |
| PF01835 | A2M_N        | PF00207 | A2M          | 0 |
| PF07677 | A2M_recep    | PF01759 | NTR          | 0 |
| PF07677 | A2M_recep    | PF00207 | A2M          | 0 |
| PF07677 | A2M_recep    | PF01835 | A2M_N        | 0 |
| PF07677 | A2M_recep    | PF07677 | A2M_recep    | 0 |
| PF07678 | A2M_comp     | PF01835 | A2M_N        | 0 |
| PF07678 | A2M_comp     | PF07677 | A2M_recep    | 0 |
| PF07678 | A2M_comp     | PF07678 | A2M_comp     | 0 |
| PF07703 | A2M_N_2      | PF00207 | A2M          | 0 |
| PF07703 | A2M_N_2      | PF01835 | A2M_N        | 0 |
| PF01821 | ANATO        | PF07677 | A2M_recep    | 0 |
| PF01627 | Hpt          | PF00072 | Response_reg | 0 |
