# Supplementary material
Source: PubMed Central journal article supplement (PMC2742434)
Supplement: M800354-MCP200_2.pdf [file M800354-MCP200_2.pdf]

| KEGG ID A  | Protein Name A | IPI No. A   | KEGG ID B  | Protein Name B | IPI No. B   | PIDS       |
|------------|----------------|-------------|------------|----------------|-------------|------------|
| hsa:1978   | EIF4EBP1       | IPI00002569 | hsa:9470   | EIF4E2         | IPI00006779 | 552.781068 |
| hsa:8637   | EIF4EBP3       | IPI00021476 | hsa:9470   | EIF4E2         | IPI00006779 | 552.781068 |
| hsa:8637   | EIF4EBP3       | IPI00021476 | hsa:1977   | EIF4E          | IPI00027485 | 552.781068 |
| hsa:1979   | EIF4EBP2       | IPI00002570 | hsa:1977   | EIF4E          | IPI00027485 | 552.781068 |
| hsa:1978   | EIF4EBP1       | IPI00002569 | hsa:1977   | EIF4E          | IPI00027485 | 552.781068 |
| hsa:8637   | EIF4EBP3       | IPI00021476 | hsa:9470   | EIF4E2         | IPI00006779 | 552.781068 |
| hsa:1978   | EIF4EBP1       | IPI00002569 | hsa:1977   | EIF4E          | IPI00027485 | 552.781068 |
| hsa:4194   | MDM4           | IPI00005170 | hsa:7157   | TP53           | IPI00025087 | 345.488167 |
| hsa:4193   | MDM2           | IPI00025490 | hsa:7157   | TP53           | IPI00025087 | 345.488167 |
| hsa:8717   | TRADD          | IPI00018744 | hsa:7187   | TRAF3          | IPI00297473 | 333.574783 |
| hsa:8717   | TRADD          | IPI00018744 | hsa:7185   | TRAF1          | IPI00011549 | 333.574783 |
| hsa:8717   | TRADD          | IPI00018744 | hsa:7186   | TRAF2          | IPI00030278 | 333.574783 |
| hsa:3500   | IGHG1          | IPI00829944 | hsa:7185   | TRAF1          | IPI00011549 | 333.574783 |
| hsa:332    | BIRC5          | IPI00006210 | hsa:836    | CASP3          | IPI00292140 | 331.668641 |
| hsa:57448  | BIRC6          | IPI00299635 | hsa:836    | CASP3          | IPI00292140 | 331.668641 |
| hsa:79444  | BIRC7          | IPI00152993 | hsa:836    | CASP3          | IPI00292140 | 331.668641 |
| hsa:331    | BIRC4          | IPI00303890 | hsa:836    | CASP3          | IPI00292140 | 331.668641 |
| hsa:79444  | BIRC7          | IPI00152993 | hsa:840    | CASP7          | IPI00221307 | 331.668641 |
| hsa:332    | BIRC5          | IPI00006210 | hsa:840    | CASP7          | IPI00221307 | 331.668641 |
| hsa:331    | BIRC4          | IPI00303890 | hsa:840    | CASP7          | IPI00221307 | 331.668641 |
| hsa:3108   | HLA-DMA        | IPI00291924 | hsa:972    | CD74           | IPI00022933 | 331.668641 |
| hsa:3458   | IFNG           | IPI00307209 | hsa:3459   | IFNGR1         | IPI00010808 | 331.668641 |
| hsa:4671   | NAIP           | IPI00011547 | hsa:842    | CASP9          | IPI00023875 | 331.668641 |
| hsa:112401 | BIRC8          | IPI00102423 | hsa:842    | CASP9          | IPI00023875 | 331.668641 |
| hsa:79444  | BIRC7          | IPI00152993 | hsa:842    | CASP9          | IPI00023875 | 331.668641 |
| hsa:57448  | BIRC6          | IPI00299635 | hsa:842    | CASP9          | IPI00023875 | 331.668641 |
| hsa:332    | BIRC5          | IPI00006210 | hsa:842    | CASP9          | IPI00023875 | 331.668641 |
| hsa:331    | BIRC4          | IPI00303890 | hsa:842    | CASP9          | IPI00023875 | 331.668641 |
| hsa:3117   | HLA-DQA1       | IPI00289658 | hsa:972    | CD74           | IPI00022933 | 331.668641 |
| hsa:3113   | HLA-DPA1       | IPI00021711 | hsa:972    | CD74           | IPI00022933 | 331.668641 |
| hsa:3122   | HLA-DRA        | IPI00005171 | hsa:972    | CD74           | IPI00022933 | 331.668641 |
| hsa:331    | BIRC4          | IPI00303890 | hsa:842    | CASP9          | IPI00023875 | 331.668641 |
| hsa:10810  | WASF3          | IPI00299003 | hsa:10096  | ACTR3          | IPI00028091 | 315.874896 |
| hsa:10163  | WASF2          | IPI00472164 | hsa:10096  | ACTR3          | IPI00028091 | 315.874896 |
| hsa:8976   | WASL           | IPI00011676 | hsa:10097  | ACTR2          | IPI00005159 | 315.874896 |
| hsa:10163  | WASF2          | IPI00472164 | hsa:60     | ACTB           | IPI00021439 | 315.874896 |
| hsa:10810  | WASF3          | IPI00299003 | hsa:60     | ACTB           | IPI00021439 | 315.874896 |
| hsa:8936   | WASF1          | IPI00022007 | hsa:60     | ACTB           | IPI00021439 | 315.874896 |
| hsa:25802  | LMOD1          | IPI00844008 | hsa:60     | ACTB           | IPI00021439 | 315.874896 |
| hsa:7456   | WIPF1          | IPI00418328 | hsa:70     | ACTC1          | IPI00023006 | 315.874896 |
| hsa:7454   | WAS            | IPI00001545 | hsa:70     | ACTC1          | IPI00023006 | 315.874896 |
| hsa:10163  | WASF2          | IPI00472164 | hsa:10097  | ACTR2          | IPI00005159 | 315.874896 |
| hsa:8936   | WASF1          | IPI00022007 | hsa:71     | ACTG1          | unknown     | 315.874896 |
| hsa:3586   | IL10           | IPI00026102 | hsa:3588   | IL10RB         | IPI00646217 | 285.027738 |
| hsa:50616  | IL22           | IPI00008372 | hsa:58985  | IL22RA1        | IPI00297430 | 285.027738 |
| hsa:282616 | IL28A          | IPI00218010 | hsa:163702 | IL28RA         | IPI00216651 | 285.027738 |
| hsa:50616  | IL22           | IPI00008372 | hsa:3588   | IL10RB         | IPI00646217 | 285.027738 |
| hsa:29949  | IL19           | IPI00028480 | hsa:53832  | IL20RA         | IPI00004366 | 285.027738 |
| hsa:50604  | IL20           | IPI00000048 | hsa:53832  | IL20RA         | IPI00004366 | 285.027738 |
| hsa:11009  | IL24           | IPI00011399 | hsa:53832  | IL20RA         | IPI00004366 | 285.027738 |
| hsa:330    | BIRC3          | IPI00013409 | hsa:836    | CASP3          | IPI00292140 | 252.520443 |
| hsa:329    | BIRC2          | IPI00013418 | hsa:836    | CASP3          | IPI00292140 | 252.520443 |
| hsa:330    | BIRC3          | IPI00013409 | hsa:840    | CASP7          | IPI00221307 | 252.520443 |
| hsa:329    | BIRC2          | IPI00013418 | hsa:840    | CASP7          | IPI00221307 | 252.520443 |
| hsa:56998  | CTNNBIP1       | IPI00025001 | hsa:1499   | CTNNB1         | IPI00017292 | 207.2929   |
| hsa:56998  | CTNNBIP1       | IPI00025001 | hsa:3728   | JUP            | IPI00554711 | 207.2929   |
| hsa:56998  | CTNNBIP1       | IPI00025001 | hsa:3728   | JUP            | IPI00554711 | 207.2929   |
| hsa:329    | BIRC2          | IPI00013418 | hsa:842    | CASP9          | IPI00023875 | 178.744098 |
| hsa:330    | BIRC3          | IPI00013409 | hsa:842    | CASP9          | IPI00023875 | 178.744098 |

|            |        |             |           |        |             |            |
|------------|--------|-------------|-----------|--------|-------------|------------|
| hsa:837    | CASP4  | IPI00027725 | hsa:23581 | CASP14 | IPI00013885 | 173.372244 |
| hsa:837    | CASP4  | IPI00027725 | hsa:843   | CASP10 | IPI00290791 | 173.372244 |
| hsa:834    | CASP1  | IPI00021800 | hsa:23581 | CASP14 | IPI00013885 | 173.372244 |
| hsa:8767   | RIPK2  | IPI00021917 | hsa:8837  | CFLAR  | IPI00007287 | 173.372244 |
| hsa:8996   | NOL3   | IPI00105916 | hsa:835   | CASP2  | IPI00291570 | 173.372244 |
| hsa:842    | CASP9  | IPI00023875 | hsa:843   | CASP10 | IPI00290791 | 173.372244 |
| hsa:835    | CASP2  | IPI00291570 | hsa:8837  | CFLAR  | IPI00007287 | 173.372244 |
| hsa:835    | CASP2  | IPI00291570 | hsa:843   | CASP10 | IPI00290791 | 173.372244 |
| hsa:29108  | PYCARD | IPI00001699 | hsa:841   | CASP8  | IPI00000149 | 173.372244 |
| hsa:842    | CASP9  | IPI00023875 | hsa:836   | CASP3  | IPI00292140 | 173.372244 |
| hsa:317    | APAF1  | IPI00023630 | hsa:836   | CASP3  | IPI00292140 | 173.372244 |
| hsa:837    | CASP4  | IPI00027725 | hsa:836   | CASP3  | IPI00292140 | 173.372244 |
| hsa:10392  | NOD1   | IPI00005776 | hsa:837   | CASP4  | IPI00027725 | 173.372244 |
| hsa:440068 | INCA   | unknown     | hsa:834   | CASP1  | IPI00021800 | 173.372244 |
| hsa:114769 | COP1   | IPI00554741 | hsa:834   | CASP1  | IPI00021800 | 173.372244 |
| hsa:22900  | CARD8  | IPI00032131 | hsa:834   | CASP1  | IPI00021800 | 173.372244 |
| hsa:29108  | PYCARD | IPI00001699 | hsa:834   | CASP1  | IPI00021800 | 173.372244 |
| hsa:58484  | NLRC4  | IPI00293227 | hsa:834   | CASP1  | IPI00021800 | 173.372244 |
| hsa:10392  | NOD1   | IPI00005776 | hsa:834   | CASP1  | IPI00021800 | 173.372244 |
| hsa:835    | CASP2  | IPI00291570 | hsa:840   | CASP7  | IPI00221307 | 173.372244 |
| hsa:8767   | RIPK2  | IPI00021917 | hsa:841   | CASP8  | IPI00000149 | 173.372244 |
| hsa:8738   | CRADD  | IPI00020364 | hsa:841   | CASP8  | IPI00000149 | 173.372244 |
| hsa:317    | APAF1  | IPI00023630 | hsa:841   | CASP8  | IPI00000149 | 173.372244 |
| hsa:10392  | NOD1   | IPI00005776 | hsa:841   | CASP8  | IPI00000149 | 173.372244 |
| hsa:8996   | NOL3   | IPI00105916 | hsa:841   | CASP8  | IPI00000149 | 173.372244 |
| hsa:835    | CASP2  | IPI00291570 | hsa:23581 | CASP14 | IPI00013885 | 173.372244 |
| hsa:10392  | NOD1   | IPI00005776 | hsa:835   | CASP2  | IPI00291570 | 173.372244 |
| hsa:1756   | DMD    | IPI00006091 | hsa:58    | ACTA1  | IPI00021428 | 165.83432  |
| hsa:6712   | SPTBN2 | IPI00012645 | hsa:10121 | ACTRIA | IPI00029468 | 165.83432  |
| hsa:6711   | SPTBN1 | IPI00005614 | hsa:10121 | ACTRIA | IPI00029468 | 165.83432  |
| hsa:8407   | TAGLN2 | IPI00550363 | hsa:64431 | ACTR6  | IPI00171779 | 165.83432  |
| hsa:1265   | CNN2   | IPI00015262 | hsa:60    | ACTB   | IPI00021439 | 165.83432  |
| hsa:23224  | SYNE2  | IPI00239405 | hsa:70    | ACTC1  | IPI00023006 | 165.83432  |
| hsa:81     | ACTN4  | IPI00013808 | hsa:70    | ACTC1  | IPI00023006 | 165.83432  |
| hsa:5339   | PLEC1  | IPI00014898 | hsa:70    | ACTC1  | IPI00023006 | 165.83432  |
| hsa:1756   | DMD    | IPI00006091 | hsa:70    | ACTC1  | IPI00023006 | 165.83432  |
| hsa:10788  | IQGAP2 | IPI00299048 | hsa:10097 | ACTR2  | IPI00005159 | 165.83432  |
| hsa:6876   | TAGLN  | IPI00216138 | hsa:58    | ACTA1  | IPI00021428 | 165.83432  |
| hsa:1264   | CNN1   | IPI00021264 | hsa:58    | ACTA1  | IPI00021428 | 165.83432  |
| hsa:7409   | VAV1   | IPI00011696 | hsa:58    | ACTA1  | IPI00021428 | 165.83432  |
| hsa:55742  | PARVA  | IPI00018963 | hsa:58    | ACTA1  | IPI00021428 | 165.83432  |
| hsa:23499  | MACF1  | IPI00432363 | hsa:58    | ACTA1  | IPI00021428 | 165.83432  |
| hsa:6712   | SPTBN2 | IPI00012645 | hsa:58    | ACTA1  | IPI00021428 | 165.83432  |
| hsa:8826   | IQGAP1 | IPI00009342 | hsa:58    | ACTA1  | IPI00021428 | 165.83432  |
| hsa:2620   | GAS2   | IPI00015130 | hsa:58    | ACTA1  | IPI00021428 | 165.83432  |
| hsa:6525   | SMTN   | IPI00024007 | hsa:58    | ACTA1  | IPI00021428 | 165.83432  |
| hsa:7402   | UTRN   | IPI00009329 | hsa:58    | ACTA1  | IPI00021428 | 165.83432  |
| hsa:5339   | PLEC1  | IPI00014898 | hsa:71    | ACTG1  | unknown     | 165.83432  |
| hsa:317    | APAF1  | IPI00023630 | hsa:837   | CASP4  | IPI00027725 | 162.065359 |
| hsa:22861  | NLRP1  | IPI00328123 | hsa:834   | CASP1  | IPI00021800 | 150.758473 |
| hsa:22861  | NLRP1  | IPI00328123 | hsa:842   | CASP9  | IPI00023875 | 150.758473 |
| hsa:22861  | NLRP1  | IPI00328123 | hsa:317   | APAF1  | IPI00023630 | 150.758473 |
| hsa:22861  | NLRP1  | IPI00328123 | hsa:835   | CASP2  | IPI00291570 | 150.758473 |
| hsa:22861  | NLRP1  | IPI00328123 | hsa:10392 | NOD1   | IPI00005776 | 150.758473 |
| hsa:22861  | NLRP1  | IPI00328123 | hsa:58484 | NLRC4  | IPI00293227 | 150.758473 |
| hsa:22861  | NLRP1  | IPI00328123 | hsa:29108 | PYCARD | IPI00001699 | 150.758473 |
| hsa:55655  | NLRP2  | IPI00016480 | hsa:22900 | CARD8  | IPI00032131 | 150.758473 |
| hsa:22861  | NLRP1  | IPI00328123 | hsa:838   | CASP5  | IPI00873979 | 150.758473 |
| hsa:4036   | LRP2   | IPI00024292 | hsa:3630  | INS    | IPI00001508 | 142.143703 |
| hsa:3486   | IGFBP3 | IPI00018305 | hsa:3481  | IGF2   | IPI00001611 | 142.143703 |

|            |          |             |           |           |             |            |
|------------|----------|-------------|-----------|-----------|-------------|------------|
| hsa:3486   | IGFBP3   | IPI00018305 | hsa:3479  | IGF1      | IPI00001610 | 142.143703 |
| hsa:3487   | IGFBP4   | IPI00305380 | hsa:3481  | IGF2      | IPI00001611 | 142.143703 |
| hsa:3487   | IGFBP4   | IPI00305380 | hsa:3479  | IGF1      | IPI00001610 | 142.143703 |
| hsa:4856   | NOV      | IPI00011140 | hsa:3481  | IGF2      | IPI00001611 | 142.143703 |
| hsa:4856   | NOV      | IPI00011140 | hsa:3479  | IGF1      | IPI00001610 | 142.143703 |
| hsa:3488   | IGFBP5   | IPI00029236 | hsa:3481  | IGF2      | IPI00001611 | 142.143703 |
| hsa:3488   | IGFBP5   | IPI00029236 | hsa:3479  | IGF1      | IPI00001610 | 142.143703 |
| hsa:3489   | IGFBP6   | IPI00029235 | hsa:3481  | IGF2      | IPI00001611 | 142.143703 |
| hsa:3490   | IGFBP7   | IPI00016915 | hsa:3630  | INS       | IPI00001508 | 142.143703 |
| hsa:4856   | NOV      | IPI00011140 | hsa:3630  | INS       | IPI00001508 | 142.143703 |
| hsa:3489   | IGFBP6   | IPI00029235 | hsa:3479  | IGF1      | IPI00001610 | 142.143703 |
| hsa:3485   | IGFBP2   | IPI00297284 | hsa:3479  | IGF1      | IPI00001610 | 142.143703 |
| hsa:3484   | IGFBP1   | IPI00031086 | hsa:3479  | IGF1      | IPI00001610 | 142.143703 |
| hsa:3490   | IGFBP7   | IPI00016915 | hsa:3479  | IGF1      | IPI00001610 | 142.143703 |
| hsa:3485   | IGFBP2   | IPI00297284 | hsa:3481  | IGF2      | IPI00001611 | 142.143703 |
| hsa:3484   | IGFBP1   | IPI00031086 | hsa:3481  | IGF2      | IPI00001611 | 142.143703 |
| hsa:3490   | IGFBP7   | IPI00016915 | hsa:3481  | IGF2      | IPI00001611 | 142.143703 |
| hsa:1514   | CTSL1    | IPI00012887 | hsa:7038  | TG        | IPI00306129 | 138.195267 |
| hsa:1514   | CTSL1    | IPI00012887 | hsa:3486  | IGFBP3    | IPI00018305 | 138.195267 |
| hsa:8945   | BTRC     | IPI00413142 | hsa:3728  | JUP       | IPI00554711 | 135.892012 |
| hsa:8945   | BTRC     | IPI00413142 | hsa:1499  | CTNNB1    | IPI00017292 | 135.892012 |
| hsa:5771   | PTPN2    | IPI00219695 | hsa:3837  | KPNB1     | IPI00001639 | 125.632061 |
| hsa:5795   | PTPRJ    | IPI00847732 | hsa:1500  | CTNND1    | IPI00219725 | 125.632061 |
| hsa:5777   | PTPN6    | IPI00218604 | hsa:1500  | CTNND1    | IPI00219725 | 125.632061 |
| hsa:5783   | PTPN13   | IPI00030246 | hsa:1499  | CTNNB1    | IPI00017292 | 125.632061 |
| hsa:5784   | PTPN14   | IPI00018914 | hsa:1499  | CTNNB1    | IPI00017292 | 125.632061 |
| hsa:5777   | PTPN6    | IPI00218604 | hsa:1499  | CTNNB1    | IPI00017292 | 125.632061 |
| hsa:5795   | PTPRJ    | IPI00847732 | hsa:1499  | CTNNB1    | IPI00017292 | 125.632061 |
| hsa:5803   | PTPRZ1   | IPI00216283 | hsa:1499  | CTNNB1    | IPI00017292 | 125.632061 |
| hsa:5770   | PTPN1    | IPI00297261 | hsa:1499  | CTNNB1    | IPI00017292 | 125.632061 |
| hsa:5784   | PTPN14   | IPI00018914 | hsa:3728  | JUP       | IPI00554711 | 125.632061 |
| hsa:5795   | PTPRJ    | IPI00847732 | hsa:3728  | JUP       | IPI00554711 | 125.632061 |
| hsa:5783   | PTPN13   | IPI00030246 | hsa:324   | APC       | IPI00012391 | 125.632061 |
| hsa:11156  | PTP4A3   | IPI00289328 | hsa:55898 | UNC45A    | IPI00072534 | 125.632061 |
| hsa:11156  | PTP4A3   | IPI00289328 | hsa:10985 | GCN1L1    | IPI00001159 | 125.632061 |
| hsa:11156  | PTP4A3   | IPI00289328 | hsa:55027 | HEATR3    | IPI00100984 | 125.632061 |
| hsa:11156  | PTP4A3   | IPI00289328 | hsa:30000 | TNPO2     | IPI00409698 | 125.632061 |
| hsa:11156  | PTP4A3   | IPI00289328 | hsa:51606 | ATP6V1H   | IPI00296191 | 125.632061 |
| hsa:317    | APAF1    | IPI00023630 | hsa:842   | CASP9     | IPI00023875 | 118.440708 |
| hsa:4615   | MYD88    | IPI00383890 | hsa:8405  | SPOP      | IPI00013978 | 114.368497 |
| hsa:8772   | FADD     | IPI00011919 | hsa:7186  | TRAF2     | IPI00030278 | 114.368497 |
| hsa:10892  | MALT1    | IPI00009540 | hsa:7186  | TRAF2     | IPI00030278 | 114.368497 |
| hsa:10892  | MALT1    | IPI00009540 | hsa:7189  | TRAF6     | IPI00743663 | 114.368497 |
| hsa:4615   | MYD88    | IPI00383890 | hsa:8405  | SPOP      | IPI00013978 | 114.368497 |
| hsa:9241   | NOG      | IPI00012361 | hsa:653   | BMP5      | IPI00024886 | 103.64645  |
| hsa:9241   | NOG      | IPI00012361 | hsa:652   | BMP4      | IPI00292640 | 103.64645  |
| hsa:9241   | NOG      | IPI00012361 | hsa:655   | BMP7      | IPI00550949 | 103.64645  |
| hsa:9241   | NOG      | IPI00012361 | hsa:650   | BMP2      | IPI00025069 | 103.64645  |
| hsa:8915   | BCL10    | IPI00022477 | hsa:10892 | MALT1     | IPI00009540 | 102.281826 |
| hsa:22900  | CARD8    | IPI00032131 | hsa:842   | CASP9     | IPI00023875 | 102.281826 |
| hsa:10392  | NOD1     | IPI00005776 | hsa:842   | CASP9     | IPI00023875 | 102.281826 |
| hsa:8915   | BCL10    | IPI00022477 | hsa:842   | CASP9     | IPI00023875 | 102.281826 |
| hsa:353091 | RAET1G   | IPI00433027 | hsa:22914 | KLRK18302 | IPI00473104 | 99.217115  |
| hsa:135250 | RAET1E   | IPI00154722 | hsa:22914 | KLRK18302 | IPI00473104 | 99.217115  |
| hsa:79465  | ULBP3    | IPI00001602 | hsa:22914 | KLRK18302 | IPI00473104 | 99.217115  |
| hsa:10913  | EDAR     | IPI00007051 | hsa:7187  | TRAF3     | IPI00297473 | 90.351112  |
| hsa:10913  | EDAR     | IPI00007051 | hsa:7185  | TRAF1     | IPI00011549 | 90.351112  |
| hsa:7132   | TNFRSF1A | IPI00018880 | hsa:7185  | TRAF1     | IPI00011549 | 90.351112  |
| hsa:10913  | EDAR     | IPI00007051 | hsa:7186  | TRAF2     | IPI00030278 | 90.351112  |
| hsa:7132   | TNFRSF1A | IPI00018880 | hsa:7186  | TRAF2     | IPI00030278 | 90.351112  |

|           |        |             |           |              |             |           |
|-----------|--------|-------------|-----------|--------------|-------------|-----------|
| hsa:8767  | RIPK2  | IPI00021917 | hsa:834   | CASP1        | IPI00021800 | 87.287552 |
| hsa:7066  | THPO   | IPI00218254 | hsa:4352  | MPL          | IPI00027637 | 79.866096 |
| hsa:2056  | EPO    | IPI00307226 | hsa:2057  | EPOR         | IPI00017476 | 79.866096 |
| hsa:7135  | TNNI1  | IPI00453474 | hsa:7134  | TNNC1        | IPI00470359 | 78.968724 |
| hsa:7137  | TNNI3  | IPI00244346 | hsa:7134  | TNNC1        | IPI00470359 | 78.968724 |
| hsa:7137  | TNNI3  | IPI00244346 | hsa:5311  | PKD2         | IPI00299040 | 78.968724 |
| hsa:7136  | TNNI2  | IPI00216236 | hsa:801   | CALM1        | unknown     | 78.968724 |
| hsa:7136  | TNNI2  | IPI00216236 | hsa:7134  | TNNC1        | IPI00470359 | 78.968724 |
| hsa:7136  | TNNI2  | IPI00216236 | hsa:7125  | TNNC2        | IPI00219796 | 78.968724 |
| hsa:7139  | TNNT2  | IPI00021292 | hsa:7134  | TNNC1        | IPI00470359 | 78.968724 |
| hsa:7138  | TNNT1  | IPI00395442 | hsa:7134  | TNNC1        | IPI00470359 | 78.968724 |
| hsa:7138  | TNNT1  | IPI00395442 | hsa:22981 | RP4-691N24.1 | IPI00294173 | 78.968724 |
| hsa:7138  | TNNT1  | IPI00395442 | hsa:22981 | KIAA0980     | IPI00294173 | 78.968724 |
| hsa:1500  | CTNND1 | IPI00219725 | hsa:64403 | CDH24        | IPI00386103 | 77.734838 |
| hsa:1500  | CTNND1 | IPI00219725 | hsa:1003  | CDH5         | IPI00012792 | 77.734838 |
| hsa:1500  | CTNND1 | IPI00219725 | hsa:999   | CDH1         | IPI00025861 | 77.734838 |
| hsa:1500  | CTNND1 | IPI00219725 | hsa:1001  | CDH3         | IPI00645614 | 77.734838 |
| hsa:1499  | CTNNB1 | IPI00017292 | hsa:1014  | CDH16        | IPI00025240 | 77.734838 |
| hsa:8502  | PKP4   | IPI00021076 | hsa:1003  | CDH5         | IPI00012792 | 77.734838 |
| hsa:8502  | PKP4   | IPI00021076 | hsa:1825  | DSC3         | IPI00031549 | 77.734838 |
| hsa:1501  | CTNND2 | IPI00301317 | hsa:1000  | CDH2         | IPI00290085 | 77.734838 |
| hsa:3728  | JUP    | IPI00554711 | hsa:1830  | DSG3         | IPI00031547 | 77.734838 |
| hsa:3728  | JUP    | IPI00554711 | hsa:1829  | DSG2         | IPI00028931 | 77.734838 |
| hsa:3728  | JUP    | IPI00554711 | hsa:1824  | DSC2         | IPI00025846 | 77.734838 |
| hsa:3728  | JUP    | IPI00554711 | hsa:1823  | DSC1         | IPI00216099 | 77.734838 |
| hsa:5318  | PKP2   | IPI00005264 | hsa:1829  | DSG2         | IPI00028931 | 77.734838 |
| hsa:5318  | PKP2   | IPI00005264 | hsa:1828  | DSG1         | IPI00025753 | 77.734838 |
| hsa:5318  | PKP2   | IPI00005264 | hsa:1824  | DSC2         | IPI00025846 | 77.734838 |
| hsa:5318  | PKP2   | IPI00005264 | hsa:1823  | DSC1         | IPI00216099 | 77.734838 |
| hsa:5317  | PKP1   | IPI00071509 | hsa:1828  | DSG1         | IPI00025753 | 77.734838 |
| hsa:11187 | PKP3   | IPI00026952 | hsa:1830  | DSG3         | IPI00031547 | 77.734838 |
| hsa:11187 | PKP3   | IPI00026952 | hsa:1828  | DSG1         | IPI00025753 | 77.734838 |
| hsa:11187 | PKP3   | IPI00026952 | hsa:1824  | DSC2         | IPI00025846 | 77.734838 |
| hsa:7043  | TGFB3  | IPI00021780 | hsa:7048  | TGFBR2       | IPI00020431 | 77.734838 |
| hsa:7042  | TGFB2  | IPI00235354 | hsa:7048  | TGFBR2       | IPI00020431 | 77.734838 |
| hsa:7040  | TGFB1  | IPI00000075 | hsa:7048  | TGFBR2       | IPI00020431 | 77.734838 |
| hsa:1501  | CTNND2 | IPI00301317 | hsa:999   | CDH1         | IPI00025861 | 77.734838 |
| hsa:1434  | CSE1L  | IPI00022744 | hsa:999   | CDH1         | IPI00025861 | 77.734838 |
| hsa:11187 | PKP3   | IPI00026952 | hsa:1825  | DSC3         | IPI00031549 | 77.734838 |
| hsa:11187 | PKP3   | IPI00026952 | hsa:1823  | DSC1         | IPI00216099 | 77.734838 |
| hsa:5317  | PKP1   | IPI00071509 | hsa:1823  | DSC1         | IPI00216099 | 77.734838 |
| hsa:11187 | PKP3   | IPI00026952 | hsa:1829  | DSG2         | IPI00028931 | 77.734838 |
| hsa:55183 | RIF1   | IPI00375454 | hsa:56144 | PCDHA4       | IPI00009044 | 77.734838 |
| hsa:55183 | RIF1   | IPI00375454 | hsa:56144 | PCDHA4       | IPI00009044 | 77.734838 |
| hsa:2771  | GNAI2  | IPI00748145 | hsa:107   | ADCY1        | IPI00784385 | 73.947756 |
| hsa:7185  | TRAF1  | IPI00011549 | hsa:7186  | TRAF2        | IPI00030278 | 72.101878 |
| hsa:7185  | TRAF1  | IPI00011549 | hsa:330   | BIRC3        | IPI00013409 | 72.101878 |
| hsa:7185  | TRAF1  | IPI00011549 | hsa:329   | BIRC2        | IPI00013418 | 72.101878 |
| hsa:7185  | TRAF1  | IPI00011549 | hsa:10293 | TRAIIP       | IPI00306611 | 72.101878 |
| hsa:7874  | USP7   | IPI00003965 | hsa:84447 | SYVN1        | IPI00166996 | 72.101878 |
| hsa:7874  | USP7   | IPI00003965 | hsa:64844 | 7-Mar        | IPI00010195 | 72.101878 |
| hsa:7874  | USP7   | IPI00003965 | hsa:55182 | Clorf164     | IPI00514161 | 72.101878 |
| hsa:7874  | USP7   | IPI00003965 | hsa:10346 | TRIM22       | IPI00477812 | 72.101878 |
| hsa:7874  | USP7   | IPI00003965 | hsa:4193  | MDM2         | IPI00025490 | 72.101878 |
| hsa:7185  | TRAF1  | IPI00011549 | hsa:4591  | TRIM37       | IPI00016619 | 72.101878 |
| hsa:7874  | USP7   | IPI00003965 | hsa:7187  | TRAF3        | IPI00297473 | 72.101878 |
| hsa:7874  | USP7   | IPI00003965 | hsa:4194  | MDM4         | IPI00005170 | 72.101878 |
| hsa:7874  | USP7   | IPI00003965 | hsa:7186  | TRAF2        | IPI00030278 | 72.101878 |
| hsa:7874  | USP7   | IPI00003965 | hsa:7189  | TRAF6        | IPI00743663 | 72.101878 |
| hsa:7874  | USP7   | IPI00003965 | hsa:7188  | TRAF5        | IPI00005760 | 72.101878 |

|           |           |             |           |        |             |           |
|-----------|-----------|-------------|-----------|--------|-------------|-----------|
| hsa:7874  | USP7      | IPI00003965 | hsa:9618  | TRAF4  | IPI00162088 | 72.101878 |
| hsa:7874  | USP7      | IPI00003965 | hsa:23090 | ZNF423 | IPI00100660 | 72.101878 |
| hsa:8738  | CRADD     | IPI00020364 | hsa:835   | CASP2  | IPI00291570 | 71.090418 |
| hsa:5797  | PTPRM     | IPI00293849 | hsa:1500  | CTNND1 | IPI00219725 | 70.678865 |
| hsa:5797  | PTPRM     | IPI00293849 | hsa:1499  | CTNNB1 | IPI00017292 | 70.678865 |
| hsa:5796  | PTPRK     | IPI00015756 | hsa:1499  | CTNNB1 | IPI00017292 | 70.678865 |
| hsa:10076 | PTPRU     | IPI00023197 | hsa:1499  | CTNNB1 | IPI00017292 | 70.678865 |
| hsa:5792  | PTPRF     | IPI00107831 | hsa:1499  | CTNNB1 | IPI00017292 | 70.678865 |
| hsa:5796  | PTPRK     | IPI00015756 | hsa:3728  | JUP    | IPI00554711 | 70.678865 |
| hsa:5792  | PTPRF     | IPI00107831 | hsa:3728  | JUP    | IPI00554711 | 70.678865 |
| hsa:2770  | GNAI1     | IPI00337415 | hsa:111   | ADCY5  | IPI00339214 | 70.160674 |
| hsa:2778  | GNAS      | IPI00009881 | hsa:111   | ADCY5  | IPI00339214 | 70.160674 |
| hsa:2778  | GNAS      | IPI00009881 | hsa:112   | ADCY6  | IPI00011938 | 70.160674 |
| hsa:2778  | GNAS      | IPI00009881 | hsa:108   | ADCY2  | IPI00328273 | 70.160674 |
| hsa:12    | SERPINA3  | IPI00847635 | hsa:4485  | MST1   | IPI00292218 | 69.27818  |
| hsa:5054  | SERPINE1  | IPI00007118 | hsa:5328  | PLAU   | IPI00296180 | 69.27818  |
| hsa:5054  | SERPINE1  | IPI00007118 | hsa:2147  | F2     | IPI00019568 | 69.27818  |
| hsa:5054  | SERPINE1  | IPI00007118 | hsa:5327  | PLAT   | IPI00019590 | 69.27818  |
| hsa:5054  | SERPINE1  | IPI00007118 | hsa:5340  | PLG    | IPI00019580 | 69.27818  |
| hsa:462   | SERPINC1  | IPI00032179 | hsa:2147  | F2     | IPI00019568 | 69.27818  |
| hsa:710   | SERPING1  | IPI00291866 | hsa:5340  | PLG    | IPI00019580 | 69.27818  |
| hsa:5275  | SERPINB13 | IPI00006560 | hsa:5340  | PLG    | IPI00019580 | 69.27818  |
| hsa:5274  | SERPINI1  | IPI00016150 | hsa:5340  | PLG    | IPI00019580 | 69.27818  |
| hsa:5345  | SERPINF2  | IPI00029863 | hsa:5340  | PLG    | IPI00019580 | 69.27818  |
| hsa:5269  | SERPINB6  | IPI00749398 | hsa:5340  | PLG    | IPI00019580 | 69.27818  |
| hsa:462   | SERPINC1  | IPI00032179 | hsa:5340  | PLG    | IPI00019580 | 69.27818  |
| hsa:710   | SERPING1  | IPI00291866 | hsa:2147  | F2     | IPI00019568 | 69.27818  |
| hsa:5104  | SERPINA5  | IPI00007221 | hsa:2147  | F2     | IPI00019568 | 69.27818  |
| hsa:5271  | SERPINB8  | IPI00032134 | hsa:2147  | F2     | IPI00019568 | 69.27818  |
| hsa:5270  | SERPINE2  | IPI00009890 | hsa:2147  | F2     | IPI00019568 | 69.27818  |
| hsa:3053  | SERPIND1  | IPI00292950 | hsa:2147  | F2     | IPI00019568 | 69.27818  |
| hsa:5269  | SERPINB6  | IPI00749398 | hsa:2147  | F2     | IPI00019568 | 69.27818  |
| hsa:710   | SERPING1  | IPI00291866 | hsa:5327  | PLAT   | IPI00019590 | 69.27818  |
| hsa:5274  | SERPINI1  | IPI00016150 | hsa:5327  | PLAT   | IPI00019590 | 69.27818  |
| hsa:5104  | SERPINA5  | IPI00007221 | hsa:5327  | PLAT   | IPI00019590 | 69.27818  |
| hsa:5345  | SERPINF2  | IPI00029863 | hsa:5328  | PLAU   | IPI00296180 | 69.27818  |
| hsa:5104  | SERPINA5  | IPI00007221 | hsa:5328  | PLAU   | IPI00296180 | 69.27818  |
| hsa:5055  | SERPINB2  | IPI00007117 | hsa:5328  | PLAU   | IPI00296180 | 69.27818  |
| hsa:5269  | SERPINB6  | IPI00749398 | hsa:5328  | PLAU   | IPI00296180 | 69.27818  |
| hsa:958   | CD40      | IPI00018282 | hsa:7188  | TRAF5  | IPI00005760 | 66.333728 |
| hsa:958   | CD40      | IPI00018282 | hsa:7189  | TRAF6  | IPI00743663 | 66.333728 |
| hsa:55504 | TNFRSF19  | IPI00100067 | hsa:7187  | TRAF3  | IPI00297473 | 66.333728 |
| hsa:8784  | TNFRSF18  | IPI00001796 | hsa:7187  | TRAF3  | IPI00297473 | 66.333728 |
| hsa:8792  | TNFRSF11A | IPI00021968 | hsa:7187  | TRAF3  | IPI00297473 | 66.333728 |
| hsa:8764  | TNFRSF14  | IPI00024331 | hsa:7187  | TRAF3  | IPI00297473 | 66.333728 |
| hsa:3604  | TNFRSF9   | IPI00014211 | hsa:7187  | TRAF3  | IPI00297473 | 66.333728 |
| hsa:4055  | LTBR      | IPI00006097 | hsa:7187  | TRAF3  | IPI00297473 | 66.333728 |
| hsa:7293  | TNFRSF4   | IPI00018859 | hsa:7187  | TRAF3  | IPI00297473 | 66.333728 |
| hsa:60401 | EDA2R     | IPI00029116 | hsa:7187  | TRAF3  | IPI00297473 | 66.333728 |
| hsa:7133  | TNFRSF1B  | IPI00023501 | hsa:7187  | TRAF3  | IPI00297473 | 66.333728 |
| hsa:939   | CD27      | IPI00002435 | hsa:7187  | TRAF3  | IPI00297473 | 66.333728 |
| hsa:943   | TNFRSF8   | IPI00006073 | hsa:7187  | TRAF3  | IPI00297473 | 66.333728 |
| hsa:958   | CD40      | IPI00018282 | hsa:7187  | TRAF3  | IPI00297473 | 66.333728 |
| hsa:7293  | TNFRSF4   | IPI00018859 | hsa:7185  | TRAF1  | IPI00011549 | 66.333728 |
| hsa:7133  | TNFRSF1B  | IPI00023501 | hsa:7185  | TRAF1  | IPI00011549 | 66.333728 |
| hsa:3604  | TNFRSF9   | IPI00014211 | hsa:7185  | TRAF1  | IPI00011549 | 66.333728 |
| hsa:55504 | TNFRSF19  | IPI00100067 | hsa:7185  | TRAF1  | IPI00011549 | 66.333728 |
| hsa:8784  | TNFRSF18  | IPI00001796 | hsa:7185  | TRAF1  | IPI00011549 | 66.333728 |
| hsa:8792  | TNFRSF11A | IPI00021968 | hsa:7185  | TRAF1  | IPI00011549 | 66.333728 |
| hsa:8764  | TNFRSF14  | IPI00024331 | hsa:7185  | TRAF1  | IPI00011549 | 66.333728 |

|           |           |             |            |        |             |           |
|-----------|-----------|-------------|------------|--------|-------------|-----------|
| hsa:943   | TNFRSF8   | IPI00006073 | hsa:7185   | TRAF1  | IPI00011549 | 66.333728 |
| hsa:958   | CD40      | IPI00018282 | hsa:7185   | TRAF1  | IPI00011549 | 66.333728 |
| hsa:8718  | TNFRSF25  | IPI00003999 | hsa:7186   | TRAF2  | IPI00030278 | 66.333728 |
| hsa:55504 | TNFRSF19  | IPI00100067 | hsa:7186   | TRAF2  | IPI00030278 | 66.333728 |
| hsa:23495 | TNFRSF13B | IPI00018362 | hsa:7186   | TRAF2  | IPI00030278 | 66.333728 |
| hsa:8784  | TNFRSF18  | IPI00001796 | hsa:7186   | TRAF2  | IPI00030278 | 66.333728 |
| hsa:8792  | TNFRSF11A | IPI00021968 | hsa:7186   | TRAF2  | IPI00030278 | 66.333728 |
| hsa:8764  | TNFRSF14  | IPI00024331 | hsa:7186   | TRAF2  | IPI00030278 | 66.333728 |
| hsa:3604  | TNFRSF9   | IPI00014211 | hsa:7186   | TRAF2  | IPI00030278 | 66.333728 |
| hsa:4055  | LTBR      | IPI00006097 | hsa:7186   | TRAF2  | IPI00030278 | 66.333728 |
| hsa:7293  | TNFRSF4   | IPI00018859 | hsa:7186   | TRAF2  | IPI00030278 | 66.333728 |
| hsa:939   | CD27      | IPI00002435 | hsa:7186   | TRAF2  | IPI00030278 | 66.333728 |
| hsa:943   | TNFRSF8   | IPI00006073 | hsa:7186   | TRAF2  | IPI00030278 | 66.333728 |
| hsa:958   | CD40      | IPI00018282 | hsa:7186   | TRAF2  | IPI00030278 | 66.333728 |
| hsa:55504 | TNFRSF19  | IPI00100067 | hsa:7189   | TRAF6  | IPI00743663 | 66.333728 |
| hsa:23495 | TNFRSF13B | IPI00018362 | hsa:7189   | TRAF6  | IPI00743663 | 66.333728 |
| hsa:8792  | TNFRSF11A | IPI00021968 | hsa:7189   | TRAF6  | IPI00743663 | 66.333728 |
| hsa:6401  | EDA2R     | IPI00029116 | hsa:7189   | TRAF6  | IPI00743663 | 66.333728 |
| hsa:55504 | TNFRSF19  | IPI00100067 | hsa:7188   | TRAF5  | IPI00005760 | 66.333728 |
| hsa:23495 | TNFRSF13B | IPI00018362 | hsa:7188   | TRAF5  | IPI00005760 | 66.333728 |
| hsa:8792  | TNFRSF11A | IPI00021968 | hsa:7188   | TRAF5  | IPI00005760 | 66.333728 |
| hsa:8764  | TNFRSF14  | IPI00024331 | hsa:7188   | TRAF5  | IPI00005760 | 66.333728 |
| hsa:4055  | LTBR      | IPI00006097 | hsa:7188   | TRAF5  | IPI00005760 | 66.333728 |
| hsa:7293  | TNFRSF4   | IPI00018859 | hsa:7188   | TRAF5  | IPI00005760 | 66.333728 |
| hsa:939   | CD27      | IPI00002435 | hsa:7188   | TRAF5  | IPI00005760 | 66.333728 |
| hsa:943   | TNFRSF8   | IPI00006073 | hsa:7188   | TRAF5  | IPI00005760 | 66.333728 |
| hsa:7293  | TNFRSF4   | IPI00018859 | hsa:9618   | TRAF4  | IPI00162088 | 66.333728 |
| hsa:4055  | LTBR      | IPI00006097 | hsa:9618   | TRAF4  | IPI00162088 | 66.333728 |
| hsa:654   | BMP6      | IPI00024887 | hsa:658    | BMPR1B | IPI00010862 | 65.460916 |
| hsa:654   | BMP6      | IPI00024887 | hsa:657    | BMPR1A | IPI00005731 | 65.460916 |
| hsa:654   | BMP6      | IPI00024887 | hsa:659    | BMPR2  | IPI00783156 | 65.460916 |
| hsa:654   | BMP6      | IPI00024887 | hsa:92     | ACVR2A | IPI00015691 | 65.460916 |
| hsa:655   | BMP7      | IPI00550949 | hsa:658    | BMPR1B | IPI00010862 | 65.460916 |
| hsa:655   | BMP7      | IPI00550949 | hsa:93     | ACVR2B | IPI00437565 | 65.460916 |
| hsa:655   | BMP7      | IPI00550949 | hsa:657    | BMPR1A | IPI00005731 | 65.460916 |
| hsa:655   | BMP7      | IPI00550949 | hsa:659    | BMPR2  | IPI00783156 | 65.460916 |
| hsa:655   | BMP7      | IPI00550949 | hsa:90     | ACVR1  | IPI00029219 | 65.460916 |
| hsa:3624  | INHBA     | IPI00028670 | hsa:93     | ACVR2B | IPI00437565 | 65.460916 |
| hsa:3624  | INHBA     | IPI00028670 | hsa:91     | ACVR1B | IPI00005732 | 65.460916 |
| hsa:3624  | INHBA     | IPI00028670 | hsa:90     | ACVR1  | IPI00029219 | 65.460916 |
| hsa:3625  | INHBB     | IPI00297026 | hsa:130399 | ACVR1C | IPI00302552 | 65.460916 |
| hsa:3625  | INHBB     | IPI00297026 | hsa:93     | ACVR2B | IPI00437565 | 65.460916 |
| hsa:3625  | INHBB     | IPI00297026 | hsa:91     | ACVR1B | IPI00005732 | 65.460916 |
| hsa:3625  | INHBB     | IPI00297026 | hsa:90     | ACVR1  | IPI00029219 | 65.460916 |
| hsa:8200  | GDF5      | IPI00015522 | hsa:659    | BMPR2  | IPI00783156 | 65.460916 |
| hsa:8200  | GDF5      | IPI00015522 | hsa:658    | BMPR1B | IPI00010862 | 65.460916 |
| hsa:8200  | GDF5      | IPI00015522 | hsa:93     | ACVR2B | IPI00437565 | 65.460916 |
| hsa:8200  | GDF5      | IPI00015522 | hsa:657    | BMPR1A | IPI00005731 | 65.460916 |
| hsa:8200  | GDF5      | IPI00015522 | hsa:90     | ACVR1  | IPI00029219 | 65.460916 |
| hsa:3626  | INHBC     | IPI00023314 | hsa:93     | ACVR2B | IPI00437565 | 65.460916 |
| hsa:3626  | INHBC     | IPI00023314 | hsa:91     | ACVR1B | IPI00005732 | 65.460916 |
| hsa:3626  | INHBC     | IPI00023314 | hsa:90     | ACVR1  | IPI00029219 | 65.460916 |
| hsa:2661  | GDF9      | IPI00029127 | hsa:658    | BMPR1B | IPI00010862 | 65.460916 |
| hsa:2661  | GDF9      | IPI00029127 | hsa:659    | BMPR2  | IPI00783156 | 65.460916 |
| hsa:2661  | GDF9      | IPI00029127 | hsa:657    | BMPR1A | IPI00005731 | 65.460916 |
| hsa:650   | BMP2      | IPI00025069 | hsa:658    | BMPR1B | IPI00010862 | 65.460916 |
| hsa:650   | BMP2      | IPI00025069 | hsa:657    | BMPR1A | IPI00005731 | 65.460916 |
| hsa:650   | BMP2      | IPI00025069 | hsa:659    | BMPR2  | IPI00783156 | 65.460916 |
| hsa:650   | BMP2      | IPI00025069 | hsa:90     | ACVR1  | IPI00029219 | 65.460916 |
| hsa:652   | BMP4      | IPI00292640 | hsa:659    | BMPR2  | IPI00783156 | 65.460916 |

|            |          |             |           |          |             |           |
|------------|----------|-------------|-----------|----------|-------------|-----------|
| hsa:7040   | TGFB1    | IPI00000075 | hsa:94    | ACVRL1   | IPI00293271 | 65.460916 |
| hsa:7043   | TGFB3    | IPI00021780 | hsa:94    | ACVRL1   | IPI00293271 | 65.460916 |
| hsa:268    | AMH      | IPI00008577 | hsa:269   | AMHR2    | IPI00003446 | 65.460916 |
| hsa:2661   | GDF9     | IPI00029127 | hsa:92    | ACVR2A   | IPI00015691 | 65.460916 |
| hsa:3626   | INHBC    | IPI00023314 | hsa:92    | ACVR2A   | IPI00015691 | 65.460916 |
| hsa:8200   | GDF5     | IPI00015522 | hsa:92    | ACVR2A   | IPI00015691 | 65.460916 |
| hsa:3625   | INHBB    | IPI00297026 | hsa:92    | ACVR2A   | IPI00015691 | 65.460916 |
| hsa:3624   | INHBA    | IPI00028670 | hsa:92    | ACVR2A   | IPI00015691 | 65.460916 |
| hsa:655    | BMP7     | IPI00550949 | hsa:92    | ACVR2A   | IPI00015691 | 65.460916 |
| hsa:7043   | TGFB3    | IPI00021780 | hsa:7046  | TGFBR1   | IPI00005733 | 65.460916 |
| hsa:7042   | TGFB2    | IPI00235354 | hsa:7046  | TGFBR1   | IPI00005733 | 65.460916 |
| hsa:7040   | TGFB1    | IPI00000075 | hsa:7046  | TGFBR1   | IPI00005733 | 65.460916 |
| hsa:392255 | GDF6     | IPI00419815 | hsa:657   | BMPR1A   | IPI00005731 | 65.460916 |
| hsa:653    | BMP5     | IPI00024886 | hsa:657   | BMPR1A   | IPI00005731 | 65.460916 |
| hsa:652    | BMP4     | IPI00292640 | hsa:657   | BMPR1A   | IPI00005731 | 65.460916 |
| hsa:9210   | BMP15    | IPI00001485 | hsa:658   | BMPR1B   | IPI00010862 | 65.460916 |
| hsa:392255 | GDF6     | IPI00419815 | hsa:658   | BMPR1B   | IPI00010862 | 65.460916 |
| hsa:652    | BMP4     | IPI00292640 | hsa:658   | BMPR1B   | IPI00010862 | 65.460916 |
| hsa:10220  | GDF11    | IPI00030111 | hsa:93    | ACVR2B   | IPI00437565 | 65.460916 |
| hsa:2660   | MSTN     | IPI00023751 | hsa:93    | ACVR2B   | IPI00437565 | 65.460916 |
| hsa:392255 | GDF6     | IPI00419815 | hsa:659   | BMPR2    | IPI00783156 | 65.460916 |
| hsa:1130   | LYST     | IPI00796450 | hsa:3837  | KPNB1    | IPI00001639 | 64.491125 |
| hsa:8161   | COIL     | IPI00006442 | hsa:3839  | KPNA3    | IPI00299033 | 64.491125 |
| hsa:9391   | CIAO1    | IPI00008791 | hsa:64210 | MMS19    | IPI00180322 | 64.491125 |
| hsa:9391   | CIAO1    | IPI00008791 | hsa:79711 | IPO4     | IPI00156374 | 64.491125 |
| hsa:9391   | CIAO1    | IPI00008791 | hsa:54919 | HEATR2   | IPI00242630 | 64.491125 |
| hsa:6907   | TBL1X    | IPI00218132 | hsa:1499  | CTNNB1   | IPI00017292 | 64.491125 |
| hsa:64223  | GBL      | IPI00420058 | hsa:57521 | KIAA1303 | IPI00166044 | 64.491125 |
| hsa:6004   | RGS16    | IPI00289948 | hsa:2779  | GNAT1    | IPI00218488 | 63.782431 |
| hsa:8787   | RGS9     | IPI00027385 | hsa:2779  | GNAT1    | IPI00218488 | 63.782431 |
| hsa:8601   | RGS20    | IPI00008802 | hsa:2770  | GNAI1    | IPI00337415 | 63.782431 |
| hsa:64407  | RGS18    | IPI00016825 | hsa:2770  | GNAI1    | IPI00337415 | 63.782431 |
| hsa:10287  | RGS19    | IPI00028108 | hsa:2770  | GNAI1    | IPI00337415 | 63.782431 |
| hsa:6001   | RGS10    | IPI00013454 | hsa:2770  | GNAI1    | IPI00337415 | 63.782431 |
| hsa:6000   | RGS7     | IPI00028457 | hsa:2770  | GNAI1    | IPI00337415 | 63.782431 |
| hsa:5999   | RGS4     | IPI00028112 | hsa:2770  | GNAI1    | IPI00337415 | 63.782431 |
| hsa:6004   | RGS16    | IPI00289948 | hsa:2770  | GNAI1    | IPI00337415 | 63.782431 |
| hsa:10636  | RGS14    | IPI00012893 | hsa:2770  | GNAI1    | IPI00337415 | 63.782431 |
| hsa:6002   | RGS12    | IPI00024714 | hsa:2770  | GNAI1    | IPI00337415 | 63.782431 |
| hsa:64407  | RGS18    | IPI00016825 | hsa:2776  | GNAQ     | IPI00288947 | 63.782431 |
| hsa:6003   | RGS13    | IPI00024710 | hsa:2776  | GNAQ     | IPI00288947 | 63.782431 |
| hsa:8490   | RGS5     | IPI00183077 | hsa:2776  | GNAQ     | IPI00288947 | 63.782431 |
| hsa:6000   | RGS7     | IPI00028457 | hsa:2776  | GNAQ     | IPI00288947 | 63.782431 |
| hsa:5999   | RGS4     | IPI00028112 | hsa:2776  | GNAQ     | IPI00288947 | 63.782431 |
| hsa:6004   | RGS16    | IPI00289948 | hsa:2776  | GNAQ     | IPI00288947 | 63.782431 |
| hsa:5997   | RGS2     | IPI00013177 | hsa:2776  | GNAQ     | IPI00288947 | 63.782431 |
| hsa:9826   | ARHGEF11 | IPI00157442 | hsa:2768  | GNA12    | IPI00328744 | 63.782431 |
| hsa:8601   | RGS20    | IPI00008802 | hsa:2781  | GNAZ     | IPI00328128 | 63.782431 |
| hsa:10287  | RGS19    | IPI00028108 | hsa:2781  | GNAZ     | IPI00328128 | 63.782431 |
| hsa:6001   | RGS10    | IPI00013454 | hsa:2781  | GNAZ     | IPI00328128 | 63.782431 |
| hsa:6000   | RGS7     | IPI00028457 | hsa:2781  | GNAZ     | IPI00328128 | 63.782431 |
| hsa:5996   | RGS1     | IPI00873849 | hsa:2775  | GNAO1    | IPI00220281 | 63.782431 |
| hsa:10287  | RGS19    | IPI00028108 | hsa:2775  | GNAO1    | IPI00220281 | 63.782431 |
| hsa:8490   | RGS5     | IPI00183077 | hsa:2775  | GNAO1    | IPI00220281 | 63.782431 |
| hsa:6000   | RGS7     | IPI00028457 | hsa:2775  | GNAO1    | IPI00220281 | 63.782431 |
| hsa:5999   | RGS4     | IPI00028112 | hsa:2775  | GNAO1    | IPI00220281 | 63.782431 |
| hsa:6004   | RGS16    | IPI00289948 | hsa:2775  | GNAO1    | IPI00220281 | 63.782431 |
| hsa:10636  | RGS14    | IPI00012893 | hsa:2775  | GNAO1    | IPI00220281 | 63.782431 |
| hsa:23161  | SNX13    | IPI00478181 | hsa:2778  | GNAS     | IPI00009881 | 63.782431 |
| hsa:5997   | RGS2     | IPI00013177 | hsa:2778  | GNAS     | IPI00009881 | 63.782431 |

|           |           |             |           |           |             |           |
|-----------|-----------|-------------|-----------|-----------|-------------|-----------|
| hsa:64407 | RGS18     | IPI00016825 | hsa:2771  | GNAI2     | IPI00748145 | 63.782431 |
| hsa:10287 | RGS19     | IPI00028108 | hsa:2771  | GNAI2     | IPI00748145 | 63.782431 |
| hsa:8490  | RGS5      | IPI00183077 | hsa:2771  | GNAI2     | IPI00748145 | 63.782431 |
| hsa:5999  | RGS4      | IPI00028112 | hsa:2771  | GNAI2     | IPI00748145 | 63.782431 |
| hsa:6004  | RGS16     | IPI00289948 | hsa:2771  | GNAI2     | IPI00748145 | 63.782431 |
| hsa:10636 | RGS14     | IPI00012893 | hsa:2771  | GNAI2     | IPI00748145 | 63.782431 |
| hsa:6002  | RGS12     | IPI00024714 | hsa:2771  | GNAI2     | IPI00748145 | 63.782431 |
| hsa:64407 | RGS18     | IPI00016825 | hsa:2773  | GNAI3     | IPI00220578 | 63.782431 |
| hsa:10287 | RGS19     | IPI00028108 | hsa:2773  | GNAI3     | IPI00220578 | 63.782431 |
| hsa:8490  | RGS5      | IPI00183077 | hsa:2773  | GNAI3     | IPI00220578 | 63.782431 |
| hsa:6001  | RGS10     | IPI00013454 | hsa:2773  | GNAI3     | IPI00220578 | 63.782431 |
| hsa:6000  | RGS7      | IPI00028457 | hsa:2773  | GNAI3     | IPI00220578 | 63.782431 |
| hsa:6004  | RGS16     | IPI00289948 | hsa:2773  | GNAI3     | IPI00220578 | 63.782431 |
| hsa:10636 | RGS14     | IPI00012893 | hsa:2773  | GNAI3     | IPI00220578 | 63.782431 |
| hsa:6002  | RGS12     | IPI00024714 | hsa:2773  | GNAI3     | IPI00220578 | 63.782431 |
| hsa:9826  | ARHGFEF11 | IPI00157442 | hsa:10672 | GNAI3     | IPI00290928 | 63.782431 |
| hsa:6004  | RGS16     | IPI00289948 | hsa:10672 | GNAI3     | IPI00290928 | 63.782431 |
| hsa:5997  | RGS2      | IPI00013177 | hsa:2769  | GNAI5     | IPI00027243 | 63.782431 |
| hsa:5906  | RAP1A     | IPI00019345 | hsa:10636 | RGS14     | IPI00012893 | 63.45701  |
| hsa:5911  | RAP2A     | IPI00019346 | hsa:10636 | RGS14     | IPI00012893 | 63.45701  |
| hsa:1499  | CTNNB1    | IPI00017292 | hsa:1009  | CDH11     | IPI00304227 | 63.339498 |
| hsa:1499  | CTNNB1    | IPI00017292 | hsa:1006  | CDH8      | IPI00024036 | 63.339498 |
| hsa:1499  | CTNNB1    | IPI00017292 | hsa:1003  | CDH5      | IPI00012792 | 63.339498 |
| hsa:1499  | CTNNB1    | IPI00017292 | hsa:1825  | DSC3      | IPI00031549 | 63.339498 |
| hsa:1499  | CTNNB1    | IPI00017292 | hsa:999   | CDH1      | IPI00025861 | 63.339498 |
| hsa:1499  | CTNNB1    | IPI00017292 | hsa:1007  | CDH9      | IPI00297180 | 63.339498 |
| hsa:1499  | CTNNB1    | IPI00017292 | hsa:64403 | CDH24     | IPI00386103 | 63.339498 |
| hsa:1499  | CTNNB1    | IPI00017292 | hsa:1005  | CDH7      | IPI00297181 | 63.339498 |
| hsa:1499  | CTNNB1    | IPI00017292 | hsa:1001  | CDH3      | IPI00645614 | 63.339498 |
| hsa:1499  | CTNNB1    | IPI00017292 | hsa:1000  | CDH2      | IPI00290085 | 63.339498 |
| hsa:1499  | CTNNB1    | IPI00017292 | hsa:1013  | CDH15     | IPI00024048 | 63.339498 |
| hsa:3728  | JUP       | IPI00554711 | hsa:1003  | CDH5      | IPI00012792 | 63.339498 |
| hsa:3728  | JUP       | IPI00554711 | hsa:1825  | DSC3      | IPI00031549 | 63.339498 |
| hsa:3728  | JUP       | IPI00554711 | hsa:1828  | DSG1      | IPI00025753 | 63.339498 |
| hsa:3728  | JUP       | IPI00554711 | hsa:1000  | CDH2      | IPI00290085 | 63.339498 |
| hsa:421   | ARVCF     | IPI00010490 | hsa:1000  | CDH2      | IPI00290085 | 63.339498 |
| hsa:421   | ARVCF     | IPI00010490 | hsa:999   | CDH1      | IPI00025861 | 63.339498 |
| hsa:3728  | JUP       | IPI00554711 | hsa:999   | CDH1      | IPI00025861 | 63.339498 |
| hsa:421   | ARVCF     | IPI00010490 | hsa:1013  | CDH15     | IPI00024048 | 63.339498 |
| hsa:3728  | JUP       | IPI00554711 | hsa:1013  | CDH15     | IPI00024048 | 63.339498 |
| hsa:10673 | TNFSF13B  | IPI00031802 | hsa:23495 | TNFRSF13B | IPI00018362 | 60.575592 |
| hsa:8741  | TNFSF13   | unknown     | hsa:23495 | TNFRSF13B | IPI00018362 | 60.575592 |
| hsa:8741  | TNFSF13   | unknown     | hsa:608   | TNFRSF17  | IPI00293877 | 60.460429 |
| hsa:10673 | TNFSF13B  | IPI00031802 | hsa:608   | TNFRSF17  | IPI00293877 | 60.460429 |
| hsa:722   | C4BPA     | IPI00021727 | hsa:721   | C4B720    | IPI00032258 | 60.303389 |
| hsa:3075  | CFH       | IPI00029739 | hsa:718   | C3        | IPI00783987 | 60.303389 |
| hsa:1378  | CR1       | IPI00039288 | hsa:721   | C4B720    | IPI00032258 | 60.303389 |
| hsa:1378  | CR1       | IPI00039288 | hsa:720   | C4A       | IPI00874094 | 60.303389 |
| hsa:1378  | CR1       | IPI00039288 | hsa:718   | C3        | IPI00783987 | 60.303389 |
| hsa:1380  | CR2       | IPI00292859 | hsa:718   | C3        | IPI00783987 | 60.303389 |
| hsa:10878 | CFHR3     | IPI00027507 | hsa:718   | C3        | IPI00783987 | 60.303389 |
| hsa:717   | C2        | IPI00303963 | hsa:718   | C3        | IPI00783987 | 60.303389 |
| hsa:81494 | CFHR5     | IPI00843942 | hsa:718   | C3        | IPI00783987 | 60.303389 |
| hsa:10877 | CFHR4     | IPI00021578 | hsa:718   | C3        | IPI00783987 | 60.303389 |
| hsa:5648  | MASP1     | IPI00299307 | hsa:718   | C3        | IPI00783987 | 60.303389 |
| hsa:5069  | PAPPA     | IPI00001869 | hsa:718   | C3        | IPI00783987 | 60.303389 |
| hsa:629   | CFB       | IPI00019591 | hsa:718   | C3        | IPI00783987 | 60.303389 |
| hsa:4179  | CD46      | IPI00012035 | hsa:718   | C3        | IPI00783987 | 60.303389 |
| hsa:717   | C2        | IPI00303963 | hsa:727   | C5        | IPI00032291 | 60.303389 |
| hsa:730   | C7        | IPI00296608 | hsa:727   | C5        | IPI00032291 | 60.303389 |



|          |           |             |           |        |             |           |
|----------|-----------|-------------|-----------|--------|-------------|-----------|
| hsa:729  | C6        | IPI00009920 | hsa:727   | C5     | IPI00032291 | 60.303389 |
| hsa:717  | C2        | IPI00303963 | hsa:721   | C4B720 | IPI00032258 | 60.303389 |
| hsa:5648 | MASP1     | IPI00299307 | hsa:721   | C4B720 | IPI00032258 | 60.303389 |
| hsa:629  | CFB       | IPI00019591 | hsa:721   | C4B720 | IPI00032258 | 60.303389 |
| hsa:4179 | CD46      | IPI00012035 | hsa:721   | C4B720 | IPI00032258 | 60.303389 |
| hsa:867  | CBL       | IPI00027269 | hsa:10603 | SH2B2  | IPI00155706 | 50.951994 |
| hsa:867  | CBL       | IPI00027269 | hsa:6777  | STAT5B | IPI00103415 | 50.951994 |
| hsa:867  | CBL       | IPI00027269 | hsa:6776  | STAT5A | IPI00030783 | 50.951994 |
| hsa:867  | CBL       | IPI00027269 | hsa:3937  | LCP2   | IPI00297169 | 50.951994 |
| hsa:867  | CBL       | IPI00027269 | hsa:5781  | PTPN11 | IPI00658023 | 50.951994 |
| hsa:867  | CBL       | IPI00027269 | hsa:3636  | INPPL1 | IPI00016932 | 50.951994 |
| hsa:867  | CBL       | IPI00027269 | hsa:6464  | SHC1   | IPI00645103 | 50.951994 |
| hsa:867  | CBL       | IPI00027269 | hsa:5295  | PIK3R1 | IPI00021448 | 50.951994 |
| hsa:868  | CBLB      | IPI00292856 | hsa:5295  | PIK3R1 | IPI00021448 | 50.951994 |
| hsa:867  | CBL       | IPI00027269 | hsa:5777  | PTPN6  | IPI00218604 | 50.951994 |
| hsa:868  | CBLB      | IPI00292856 | hsa:29760 | BLNK   | IPI00002434 | 50.951994 |
| hsa:7133 | TNFRSF1B  | IPI00023501 | hsa:7189  | TRAF6  | IPI00743663 | 50.441272 |
| hsa:7133 | TNFRSF1B  | IPI00023501 | hsa:7186  | TRAF2  | IPI00030278 | 50.441272 |
| hsa:8737 | RIPK1     | IPI00013773 | hsa:7185  | TRAF1  | IPI00011549 | 48.363274 |
| hsa:867  | CBL       | IPI00027269 | hsa:4690  | NCK1   | IPI00028065 | 48.085086 |
| hsa:867  | CBL       | IPI00027269 | hsa:7410  | VAV2   | IPI00446303 | 48.085086 |
| hsa:867  | CBL       | IPI00027269 | hsa:84174 | SLA2   | IPI00030447 | 48.085086 |
| hsa:867  | CBL       | IPI00027269 | hsa:5296  | PIK3R2 | IPI00011736 | 48.085086 |
| hsa:867  | CBL       | IPI00027269 | hsa:1399  | CRKL   | IPI00004839 | 48.085086 |
| hsa:867  | CBL       | IPI00027269 | hsa:6503  | SLA    | IPI00009499 | 48.085086 |
| hsa:867  | CBL       | IPI00027269 | hsa:5335  | PLCG1  | IPI00016736 | 48.085086 |
| hsa:867  | CBL       | IPI00027269 | hsa:7409  | VAV1   | IPI00011696 | 48.085086 |
| hsa:867  | CBL       | IPI00027269 | hsa:2885  | GRB2   | IPI00021327 | 48.085086 |
| hsa:867  | CBL       | IPI00027269 | hsa:1398  | CRK    | IPI00004838 | 48.085086 |
| hsa:12   | SERPINA3  | IPI00847635 | hsa:11330 | CTRC   | IPI00018553 | 46.426182 |
| hsa:12   | SERPINA3  | IPI00847635 | hsa:354   | KLK3   | IPI00010858 | 46.426182 |
| hsa:12   | SERPINA3  | IPI00847635 | hsa:3817  | KLK2   | IPI00022227 | 46.426182 |
| hsa:12   | SERPINA3  | IPI00847635 | hsa:1991  | ELA2   | IPI00027769 | 46.426182 |
| hsa:12   | SERPINA3  | IPI00847635 | hsa:1990  | ELA1   | IPI00019729 | 46.426182 |
| hsa:12   | SERPINA3  | IPI00847635 | hsa:1215  | CMA1   | IPI00013937 | 46.426182 |
| hsa:12   | SERPINA3  | IPI00847635 | hsa:1504  | CTRB1  | IPI00015133 | 46.426182 |
| hsa:12   | SERPINA3  | IPI00847635 | hsa:1506  | CTRL   | IPI00643847 | 46.426182 |
| hsa:12   | SERPINA3  | IPI00847635 | hsa:1511  | CTSG   | IPI00028064 | 46.426182 |
| hsa:5054 | SERPINE1  | IPI00007118 | hsa:3817  | KLK2   | IPI00022227 | 46.426182 |
| hsa:5054 | SERPINE1  | IPI00007118 | hsa:1991  | ELA2   | IPI00027769 | 46.426182 |
| hsa:183  | AGT       | IPI00032220 | hsa:1215  | CMA1   | IPI00013937 | 46.426182 |
| hsa:183  | AGT       | IPI00032220 | hsa:1511  | CTSG   | IPI00028064 | 46.426182 |
| hsa:462  | SERPINC1  | IPI00032179 | hsa:5653  | KLK6   | IPI00023845 | 46.426182 |
| hsa:5275 | SERPINB13 | IPI00006560 | hsa:5644  | PRSS1  | IPI00011694 | 46.426182 |
| hsa:5275 | SERPINB13 | IPI00006560 | hsa:5657  | PRTN3  | IPI00027409 | 46.426182 |
| hsa:5267 | SERPINA4  | IPI00328609 | hsa:3816  | KLK1   | IPI00304808 | 46.426182 |
| hsa:5345 | SERPINF2  | IPI00029863 | hsa:5653  | KLK6   | IPI00023845 | 46.426182 |
| hsa:5345 | SERPINF2  | IPI00029863 | hsa:2160  | F11    | IPI00008556 | 46.426182 |
| hsa:5345 | SERPINF2  | IPI00029863 | hsa:26085 | KLK13  | IPI00007726 | 46.426182 |
| hsa:5345 | SERPINF2  | IPI00029863 | hsa:5644  | PRSS1  | IPI00011694 | 46.426182 |
| hsa:5345 | SERPINF2  | IPI00029863 | hsa:1675  | CFD    | IPI00165972 | 46.426182 |
| hsa:5265 | SERPINA1  | IPI00553177 | hsa:25818 | KLK5   | IPI00032464 | 46.426182 |
| hsa:5265 | SERPINA1  | IPI00553177 | hsa:5644  | PRSS1  | IPI00011694 | 46.426182 |
| hsa:5265 | SERPINA1  | IPI00553177 | hsa:5657  | PRTN3  | IPI00027409 | 46.426182 |
| hsa:710  | SERPING1  | IPI00291866 | hsa:10747 | MASP2  | IPI00294713 | 46.426182 |
| hsa:1992 | SERPINB1  | IPI00027444 | hsa:5657  | PRTN3  | IPI00027409 | 46.426182 |
| hsa:5104 | SERPINA5  | IPI00007221 | hsa:2160  | F11    | IPI00008556 | 46.426182 |
| hsa:5104 | SERPINA5  | IPI00007221 | hsa:49    | ACR    | IPI00289614 | 46.426182 |
| hsa:5104 | SERPINA5  | IPI00007221 | hsa:3818  | KLKB1  | IPI00654888 | 46.426182 |
| hsa:5104 | SERPINA5  | IPI00007221 | hsa:3816  | KLK1   | IPI00304808 | 46.426182 |

|           |           |             |           |           |             |           |
|-----------|-----------|-------------|-----------|-----------|-------------|-----------|
| hsa:5271  | SERPINB8  | IPI00032134 | hsa:5644  | PRSS1     | IPI00011694 | 46.426182 |
| hsa:5265  | SERPINA1  | IPI00553177 | hsa:5645  | PRSS2     | IPI00011695 | 46.426182 |
| hsa:5265  | SERPINA1  | IPI00553177 | hsa:5646  | PRSS3     | IPI00015614 | 46.426182 |
| hsa:5265  | SERPINA1  | IPI00553177 | hsa:1511  | CTSG      | IPI00028064 | 46.426182 |
| hsa:5275  | SERPINB13 | IPI00006560 | hsa:1511  | CTSG      | IPI00028064 | 46.426182 |
| hsa:3053  | SERPIND1  | IPI00292950 | hsa:1511  | CTSG      | IPI00028064 | 46.426182 |
| hsa:5265  | SERPINA1  | IPI00553177 | hsa:1990  | ELA1      | IPI00019729 | 46.426182 |
| hsa:5104  | SERPINA5  | IPI00007221 | hsa:3817  | KLK2      | IPI00022227 | 46.426182 |
| hsa:5345  | SERPINF2  | IPI00029863 | hsa:3817  | KLK2      | IPI00022227 | 46.426182 |
| hsa:5269  | SERPINB6  | IPI00749398 | hsa:3817  | KLK2      | IPI00022227 | 46.426182 |
| hsa:5267  | SERPINA4  | IPI00328609 | hsa:3817  | KLK2      | IPI00022227 | 46.426182 |
| hsa:462   | SERPINC1  | IPI00032179 | hsa:3817  | KLK2      | IPI00022227 | 46.426182 |
| hsa:5104  | SERPINA5  | IPI00007221 | hsa:354   | KLK3      | IPI00010858 | 46.426182 |
| hsa:5265  | SERPINA1  | IPI00553177 | hsa:354   | KLK3      | IPI00010858 | 46.426182 |
| hsa:5265  | SERPINA1  | IPI00553177 | hsa:1504  | CTRB1     | IPI00015133 | 46.426182 |
| hsa:5345  | SERPINF2  | IPI00029863 | hsa:1504  | CTRB1     | IPI00015133 | 46.426182 |
| hsa:710   | SERPING1  | IPI00291866 | hsa:1991  | ELA2      | IPI00027769 | 46.426182 |
| hsa:5275  | SERPINB13 | IPI00006560 | hsa:1991  | ELA2      | IPI00027769 | 46.426182 |
| hsa:5265  | SERPINA1  | IPI00553177 | hsa:1991  | ELA2      | IPI00027769 | 46.426182 |
| hsa:5345  | SERPINF2  | IPI00029863 | hsa:1991  | ELA2      | IPI00027769 | 46.426182 |
| hsa:3053  | SERPIND1  | IPI00292950 | hsa:1991  | ELA2      | IPI00027769 | 46.426182 |
| hsa:1992  | SERPINB1  | IPI00027444 | hsa:1991  | ELA2      | IPI00027769 | 46.426182 |
| hsa:5104  | SERPINA5  | IPI00007221 | hsa:5624  | PROC      | IPI00021817 | 46.426182 |
| hsa:5269  | SERPINB6  | IPI00749398 | hsa:5624  | PROC      | IPI00021817 | 46.426182 |
| hsa:5272  | SERPINB9  | IPI00032139 | hsa:3002  | GZMB      | IPI00744785 | 46.426182 |
| hsa:710   | SERPING1  | IPI00291866 | hsa:716   | C1S       | IPI00744502 | 46.426182 |
| hsa:710   | SERPING1  | IPI00291866 | hsa:715   | C1R       | IPI00791901 | 46.426182 |
| hsa:51156 | SERPINA10 | IPI00007199 | hsa:2159  | F10       | IPI00019576 | 46.426182 |
| hsa:5104  | SERPINA5  | IPI00007221 | hsa:2159  | F10       | IPI00019576 | 46.426182 |
| hsa:5271  | SERPINB8  | IPI00032134 | hsa:2159  | F10       | IPI00019576 | 46.426182 |
| hsa:5269  | SERPINB6  | IPI00749398 | hsa:2159  | F10       | IPI00019576 | 46.426182 |
| hsa:2147  | F2        | IPI00019568 | hsa:2160  | F11       | IPI00008556 | 44.847379 |
| hsa:944   | TNFSF8    | IPI00031715 | hsa:943   | TNFRSF8   | IPI00006073 | 43.531509 |
| hsa:8741  | TNFSF13   | unknown     | hsa:4982  | TNFRSF11B | IPI00298362 | 43.531509 |
| hsa:8741  | TNFSF13   | unknown     | hsa:8764  | TNFRSF14  | IPI00024331 | 43.531509 |
| hsa:8741  | TNFSF13   | unknown     | hsa:7132  | TNFRSF1A  | IPI00018880 | 43.531509 |
| hsa:8741  | TNFSF13   | unknown     | hsa:355   | FAS       | IPI00744894 | 43.531509 |
| hsa:356   | FASLG     | IPI00007577 | hsa:8771  | TNFRSF6B  | unknown     | 43.531509 |
| hsa:356   | FASLG     | IPI00007577 | hsa:355   | FAS       | IPI00744894 | 43.531509 |
| hsa:7124  | TNF       | IPI00001671 | hsa:7133  | TNFRSF1B  | IPI00023501 | 43.531509 |
| hsa:1896  | EDA       | IPI00216144 | hsa:60401 | EDA2R     | IPI00029116 | 43.531509 |
| hsa:1896  | EDA       | IPI00216144 | hsa:10913 | EDAR      | IPI00007051 | 43.531509 |
| hsa:8600  | TNFSF11   | IPI00023732 | hsa:4982  | TNFRSF11B | IPI00298362 | 43.531509 |
| hsa:8600  | TNFSF11   | IPI00023732 | hsa:8792  | TNFRSF11A | IPI00021968 | 43.531509 |
| hsa:4049  | LTA       | IPI00001670 | hsa:4055  | LTBR      | IPI00006097 | 43.531509 |
| hsa:4050  | LTB       | IPI00032334 | hsa:4055  | LTBR      | IPI00006097 | 43.531509 |
| hsa:8743  | TNFSF10   | IPI00747054 | hsa:4982  | TNFRSF11B | IPI00298362 | 43.531509 |
| hsa:8743  | TNFSF10   | IPI00747054 | hsa:8793  | TNFRSF10D | IPI00294516 | 43.531509 |
| hsa:8743  | TNFSF10   | IPI00747054 | hsa:8794  | TNFRSF10C | IPI00021970 | 43.531509 |
| hsa:959   | CD40LG    | IPI00024686 | hsa:958   | CD40      | IPI00018282 | 43.531509 |
| hsa:7124  | TNF       | IPI00001671 | hsa:7132  | TNFRSF1A  | IPI00018880 | 43.531509 |
| hsa:4050  | LTB       | IPI00032334 | hsa:7132  | TNFRSF1A  | IPI00018880 | 43.531509 |
| hsa:4049  | LTA       | IPI00001670 | hsa:7132  | TNFRSF1A  | IPI00018880 | 43.531509 |
| hsa:8743  | TNFSF10   | IPI00747054 | hsa:8797  | TNFRSF10A | IPI00021975 | 43.531509 |
| hsa:9966  | TNFSF15   | IPI00021380 | hsa:8771  | TNFRSF6B  | unknown     | 43.531509 |
| hsa:8740  | TNFSF14   | IPI00307531 | hsa:8771  | TNFRSF6B  | unknown     | 43.531509 |
| hsa:8740  | TNFSF14   | IPI00307531 | hsa:8764  | TNFRSF14  | IPI00024331 | 43.531509 |
| hsa:4049  | LTA       | IPI00001670 | hsa:8764  | TNFRSF14  | IPI00024331 | 43.531509 |
| hsa:4049  | LTA       | IPI00001670 | hsa:7133  | TNFRSF1B  | IPI00023501 | 43.531509 |
| hsa:8740  | TNFSF14   | IPI00307531 | hsa:4055  | LTBR      | IPI00006097 | 43.531509 |

|           |          |             |            |           |             |           |
|-----------|----------|-------------|------------|-----------|-------------|-----------|
| hsa:9966  | TNFSF15  | IPI00021380 | hsa:8718   | TNFRSF25  | IPI00003999 | 43.531509 |
| hsa:8742  | TNFSF12  | IPI00021900 | hsa:8718   | TNFRSF25  | IPI00003999 | 43.531509 |
| hsa:970   | CD70     | IPI00031713 | hsa:939    | CD27      | IPI00002435 | 43.531509 |
| hsa:8743  | TNFSF10  | IPI00747054 | hsa:8795   | TNFRSF10B | IPI00296379 | 43.531509 |
| hsa:7292  | TNFSF4   | IPI00011974 | hsa:7293   | TNFRSF4   | IPI00018859 | 43.531509 |
| hsa:8744  | TNFSF9   | IPI00013301 | hsa:3604   | TNFRSF9   | IPI00014211 | 43.531509 |
| hsa:8995  | TNFSF18  | IPI00009195 | hsa:8784   | TNFRSF18  | IPI00001796 | 43.531509 |
| hsa:10673 | TNFSF13B | IPI00031802 | hsa:115650 | TNFRSF13C | IPI00045337 | 43.186021 |
| hsa:5879  | RAC1     | IPI00010271 | hsa:56990  | CDC42SE2  | IPI00024973 | 43.073849 |
| hsa:5879  | RAC1     | IPI00010271 | hsa:56882  | CDC42SE1  | IPI00386978 | 43.073849 |
| hsa:998   | CDC42    | IPI00007189 | hsa:56882  | CDC42SE1  | IPI00386978 | 43.073849 |
| hsa:998   | CDC42    | IPI00007189 | hsa:10602  | CDC42EP3  | IPI00294391 | 43.073849 |
| hsa:998   | CDC42    | IPI00007189 | hsa:11135  | CDC42EP1  | IPI00023605 | 43.073849 |
| hsa:998   | CDC42    | IPI00007189 | hsa:148170 | CDC42EP5  | IPI00290570 | 43.073849 |
| hsa:998   | CDC42    | IPI00007189 | hsa:10435  | CDC42EP2  | IPI00009533 | 43.073849 |
| hsa:23433 | RHOQ     | IPI00012511 | hsa:10602  | CDC42EP3  | IPI00294391 | 43.073849 |
| hsa:23433 | RHOQ     | IPI00012511 | hsa:23580  | CDC42EP4  | IPI00015894 | 43.073849 |
| hsa:23433 | RHOQ     | IPI00012511 | hsa:11135  | CDC42EP1  | IPI00023605 | 43.073849 |
| hsa:57381 | RHOJ     | IPI00027952 | hsa:7454   | WAS       | IPI00001545 | 43.073849 |
| hsa:5879  | RAC1     | IPI00010271 | hsa:7454   | WAS       | IPI00001545 | 43.073849 |
| hsa:998   | CDC42    | IPI00007189 | hsa:7454   | WAS       | IPI00001545 | 43.073849 |
| hsa:23433 | RHOQ     | IPI00012511 | hsa:8976   | WASL      | IPI00011676 | 43.073849 |
| hsa:998   | CDC42    | IPI00007189 | hsa:8976   | WASL      | IPI00011676 | 43.073849 |
| hsa:23433 | RHOQ     | IPI00012511 | hsa:10435  | CDC42EP2  | IPI00009533 | 43.073849 |
| hsa:23433 | RHOQ     | IPI00012511 | hsa:7454   | WAS       | IPI00001545 | 43.073849 |
| hsa:998   | CDC42    | IPI00007189 | hsa:11135  | CDC42EP1  | IPI00023605 | 43.073849 |
| hsa:3106  | HLA-B    | unknown     | hsa:3824   | KLRD1     | IPI00012338 | 41.657853 |
| hsa:3135  | HLA-G    | IPI00015988 | hsa:3824   | KLRD1     | IPI00012338 | 41.657853 |
| hsa:3133  | HLA-E    | IPI00830076 | hsa:3824   | KLRD1     | IPI00012338 | 41.657853 |
| hsa:3133  | HLA-E    | IPI00830076 | hsa:3822   | KLRC2     | IPI00291660 | 41.657853 |
| hsa:3133  | HLA-E    | IPI00830076 | hsa:3821   | KLRC1     | IPI00001517 | 41.657853 |
| hsa:4277  | MICB     | IPI00640150 | hsa:22914  | KLRK18302 | IPI00473104 | 41.657853 |
| hsa:4276  | MICA     | unknown     | hsa:22914  | KLRK18302 | IPI00473104 | 41.657853 |
| hsa:868   | CBLB     | IPI00292856 | hsa:6464   | SHC1      | IPI00645103 | 40.617392 |
| hsa:2889  | RAPGEF1  | IPI00394743 | hsa:23433  | RHOQ      | IPI00012511 | 39.954414 |
| hsa:2889  | RAPGEF1  | IPI00394743 | hsa:5908   | RAP1B     | IPI00015148 | 39.954414 |
| hsa:2889  | RAPGEF1  | IPI00394743 | hsa:22800  | RRAS2     | IPI00012512 | 39.954414 |
| hsa:2889  | RAPGEF1  | IPI00394743 | hsa:3265   | HRAS      | IPI00000006 | 39.954414 |
| hsa:10411 | RAPGEF3  | IPI00871947 | hsa:22800  | RRAS2     | IPI00012512 | 39.954414 |
| hsa:5879  | RAC1     | IPI00010271 | hsa:752    | FMNL1     | IPI00163516 | 39.484362 |
| hsa:5879  | RAC1     | IPI00010271 | hsa:1729   | DIAPH1    | IPI00783474 | 39.484362 |
| hsa:867   | CBL      | IPI00027269 | hsa:8470   | SORBS2    | IPI00477876 | 39.484362 |
| hsa:867   | CBL      | IPI00027269 | hsa:2533   | FYB       | IPI00446986 | 39.484362 |
| hsa:867   | CBL      | IPI00027269 | hsa:30011  | SH3KBP1   | IPI00294962 | 39.484362 |
| hsa:867   | CBL      | IPI00027269 | hsa:84959  | STS-1     | IPI00154910 | 39.484362 |
| hsa:867   | CBL      | IPI00027269 | hsa:10580  | SORBS1    | IPI00186452 | 39.484362 |
| hsa:867   | CBL      | IPI00027269 | hsa:23607  | CD2AP     | IPI00412771 | 39.484362 |
| hsa:8975  | USP13    | IPI00024401 | hsa:54874  | FNBP1L    | IPI00807364 | 39.484362 |
| hsa:387   | RHOA     | IPI00478231 | hsa:1729   | DIAPH1    | IPI00783474 | 39.484362 |
| hsa:387   | RHOA     | IPI00478231 | hsa:23002  | DAAM1     | IPI00337800 | 39.484362 |
| hsa:29984 | RHOD     | IPI00010841 | hsa:1730   | DIAPH2    | IPI00844377 | 39.484362 |
| hsa:56893 | UBQLN4   | IPI00024502 | hsa:4867   | NPHP1     | IPI00028739 | 39.484362 |
| hsa:29911 | HOOK2    | IPI00002432 | hsa:2059   | EPS8      | IPI00290337 | 39.484362 |
| hsa:56893 | UBQLN4   | IPI00024502 | hsa:10254  | STAM2     | IPI00290542 | 39.484362 |
| hsa:29911 | HOOK2    | IPI00002432 | hsa:2059   | EPS8      | IPI00290337 | 39.484362 |
| hsa:868   | CBLB     | IPI00292856 | hsa:4690   | NCK1      | IPI00028065 | 39.223422 |
| hsa:868   | CBLB     | IPI00292856 | hsa:8440   | NCK2      | IPI00306531 | 39.223422 |
| hsa:868   | CBLB     | IPI00292856 | hsa:2885   | GRB2      | IPI00021327 | 39.223422 |
| hsa:868   | CBLB     | IPI00292856 | hsa:1399   | CRKL      | IPI00004839 | 39.223422 |
| hsa:868   | CBLB     | IPI00292856 | hsa:8440   | NCK2      | IPI00306531 | 39.223422 |

|            |          |             |           |           |             |           |
|------------|----------|-------------|-----------|-----------|-------------|-----------|
| hsa:23624  | CBL      | IPI00008459 | hsa:2885  | GRB2      | IPI00021327 | 39.158187 |
| hsa:23624  | CBL      | IPI00008459 | hsa:1398  | CRK       | IPI00004838 | 39.158187 |
| hsa:1950   | EGF      | IPI00000073 | hsa:2065  | ERBB3     | IPI00298285 | 38.613383 |
| hsa:7186   | TRAF2    | IPI00030278 | hsa:10293 | TRAI      | IPI00306611 | 38.304122 |
| hsa:7186   | TRAF2    | IPI00030278 | hsa:6478  | SIAH2     | IPI00305283 | 38.304122 |
| hsa:7186   | TRAF2    | IPI00030278 | hsa:330   | BIRC3     | IPI00013409 | 38.304122 |
| hsa:7186   | TRAF2    | IPI00030278 | hsa:329   | BIRC2     | IPI00013418 | 38.304122 |
| hsa:7186   | TRAF2    | IPI00030278 | hsa:11074 | TRIM31    | IPI00292397 | 38.304122 |
| hsa:7186   | TRAF2    | IPI00030278 | hsa:3983  | ABLIM1    | IPI00329495 | 38.304122 |
| hsa:7189   | TRAF6    | IPI00743663 | hsa:331   | BIRC4     | IPI00303890 | 38.304122 |
| hsa:7189   | TRAF6    | IPI00743663 | hsa:55658 | RNF126    | IPI00155562 | 38.304122 |
| hsa:7189   | TRAF6    | IPI00743663 | hsa:867   | CBL       | IPI00027269 | 38.304122 |
| hsa:7189   | TRAF6    | IPI00743663 | hsa:10155 | TRIM28    | IPI00438229 | 38.304122 |
| hsa:7186   | TRAF2    | IPI00030278 | hsa:11074 | TRIM31    | IPI00292397 | 38.304122 |
| hsa:7186   | TRAF2    | IPI00030278 | hsa:329   | BIRC2     | IPI00013418 | 38.304122 |
| hsa:7186   | TRAF2    | IPI00030278 | hsa:3983  | ABLIM1    | IPI00329495 | 38.304122 |
| hsa:6654   | SOS1     | IPI00020131 | hsa:6014  | RIT2      | IPI00163763 | 37.788059 |
| hsa:6654   | SOS1     | IPI00020131 | hsa:3265  | HRAS      | IPI00000006 | 37.788059 |
| hsa:6654   | SOS1     | IPI00020131 | hsa:6237  | RRAS      | IPI00020418 | 37.788059 |
| hsa:5923   | RASGRF1  | IPI00016784 | hsa:5879  | RAC1      | IPI00010271 | 37.788059 |
| hsa:6655   | SOS2     | IPI00020134 | hsa:3265  | HRAS      | IPI00000006 | 37.788059 |
| hsa:5923   | RASGRF1  | IPI00016784 | hsa:22800 | RRAS2     | IPI00012512 | 37.788059 |
| hsa:5923   | RASGRF1  | IPI00016784 | hsa:387   | RHOA      | IPI00478231 | 37.788059 |
| hsa:266747 | Rgr      | IPI00744438 | hsa:5899  | RALB      | IPI00004397 | 37.604154 |
| hsa:266747 | Rgr      | IPI00744438 | hsa:5898  | RALA      | IPI00217519 | 37.604154 |
| hsa:266747 | Rgr      | IPI00744438 | hsa:3265  | HRAS      | IPI00000006 | 37.604154 |
| hsa:266747 | Rgr      | IPI00744438 | hsa:5906  | RAP1A     | IPI00019345 | 37.604154 |
| hsa:4804   | NGFR     | IPI00027436 | hsa:9618  | TRAF4     | IPI00162088 | 36.200116 |
| hsa:64283  | RGNEF    | IPI00455803 | hsa:387   | RHOA      | IPI00478231 | 35.621705 |
| hsa:115557 | GEFT     | IPI00829805 | hsa:387   | RHOA      | IPI00478231 | 35.621705 |
| hsa:23263  | MCF2L    | IPI00477099 | hsa:391   | RHOG      | IPI00017342 | 35.621705 |
| hsa:23263  | MCF2L    | IPI00477099 | hsa:387   | RHOA      | IPI00478231 | 35.621705 |
| hsa:11214  | AKAP13   | IPI00329783 | hsa:387   | RHOA      | IPI00478231 | 35.621705 |
| hsa:64857  | PLEKHG2  | IPI00303373 | hsa:5879  | RAC1      | IPI00010271 | 35.621705 |
| hsa:23263  | MCF2L    | IPI00477099 | hsa:5879  | RAC1      | IPI00010271 | 35.621705 |
| hsa:115557 | GEFT     | IPI00829805 | hsa:5879  | RAC1      | IPI00010271 | 35.621705 |
| hsa:9181   | ARHGEF2  | IPI00472160 | hsa:5879  | RAC1      | IPI00010271 | 35.621705 |
| hsa:64857  | PLEKHG2  | IPI00303373 | hsa:998   | CDC42     | IPI00007189 | 35.621705 |
| hsa:23263  | MCF2L    | IPI00477099 | hsa:998   | CDC42     | IPI00007189 | 35.621705 |
| hsa:115557 | GEFT     | IPI00829805 | hsa:998   | CDC42     | IPI00007189 | 35.621705 |
| hsa:50650  | ARHGEF3  | IPI00020949 | hsa:388   | RHOB      | IPI00000041 | 35.621705 |
| hsa:9181   | ARHGEF2  | IPI00472160 | hsa:22800 | RRAS2     | IPI00012512 | 35.621705 |
| hsa:64857  | PLEKHG2  | IPI00303373 | hsa:387   | RHOA      | IPI00478231 | 35.621705 |
| hsa:50650  | ARHGEF3  | IPI00020949 | hsa:387   | RHOA      | IPI00478231 | 35.621705 |
| hsa:23370  | ARHGEF18 | IPI00480141 | hsa:387   | RHOA      | IPI00478231 | 35.621705 |
| hsa:9181   | ARHGEF2  | IPI00472160 | hsa:387   | RHOA      | IPI00478231 | 35.621705 |
| hsa:4168   | MCF2     | IPI00339309 | hsa:387   | RHOA      | IPI00478231 | 35.621705 |
| hsa:1894   | ECT2     | IPI00787864 | hsa:391   | RHOG      | IPI00017342 | 35.621705 |
| hsa:4168   | MCF2     | IPI00339309 | hsa:391   | RHOG      | IPI00017342 | 35.621705 |
| hsa:2161   | F12      | IPI00019581 | hsa:3848  | KRT1      | IPI00220327 | 35.283898 |
| hsa:2147   | F2       | IPI00019568 | hsa:2243  | FGA       | IPI00021885 | 35.283898 |
| hsa:5327   | PLAT     | IPI00019590 | hsa:2243  | FGA       | IPI00021885 | 35.283898 |
| hsa:867    | CBL      | IPI00027269 | hsa:695   | BTK       | IPI00029132 | 35.124889 |
| hsa:867    | CBL      | IPI00027269 | hsa:640   | BLK       | IPI00554756 | 35.124889 |
| hsa:867    | CBL      | IPI00027269 | hsa:3702  | ITK       | IPI00004566 | 35.124889 |
| hsa:867    | CBL      | IPI00027269 | hsa:3055  | HCK       | IPI00646510 | 35.124889 |
| hsa:867    | CBL      | IPI00027269 | hsa:3932  | LCK       | IPI00394952 | 35.124889 |
| hsa:867    | CBL      | IPI00027269 | hsa:6714  | SRC       | IPI00641230 | 35.124889 |
| hsa:867    | CBL      | IPI00027269 | hsa:25    | ABL129892 | IPI00216969 | 35.124889 |
| hsa:867    | CBL      | IPI00027269 | hsa:4067  | LYN       | IPI00298625 | 35.124889 |

|            |          |             |            |         |             |           |
|------------|----------|-------------|------------|---------|-------------|-----------|
| hsa:867    | CBL      | IPI00027269 | hsa:2534   | FYN     | IPI00219012 | 35.124889 |
| hsa:867    | CBL      | IPI00027269 | hsa:2268   | FGR     | IPI00016871 | 35.124889 |
| hsa:7704   | ZBTB16   | IPI00305613 | hsa:7572   | ZNF24   | IPI00306446 | 34.548817 |
| hsa:7704   | ZBTB16   | IPI00305613 | hsa:27033  | ZBTB32  | IPI00003915 | 34.548817 |
| hsa:7704   | ZBTB16   | IPI00305613 | hsa:6667   | SP1     | IPI00465152 | 34.548817 |
| hsa:2624   | GATA2    | IPI00012900 | hsa:27033  | ZBTB32  | IPI00003915 | 34.548817 |
| hsa:2624   | GATA2    | IPI00012900 | hsa:161882 | ZFPM1   | IPI00217346 | 34.548817 |
| hsa:10468  | FST      | IPI00021081 | hsa:83729  | INHBE   | IPI00011036 | 34.548817 |
| hsa:10468  | FST      | IPI00021081 | hsa:3623   | INHA    | IPI00007080 | 34.548817 |
| hsa:10468  | FST      | IPI00021081 | hsa:653    | BMP5    | IPI00024886 | 34.548817 |
| hsa:51341  | ZBTB7A   | IPI00026317 | hsa:6670   | SP3     | IPI00025807 | 34.548817 |
| hsa:51341  | ZBTB7A   | IPI00026317 | hsa:6671   | SP4     | IPI00025805 | 34.548817 |
| hsa:2625   | GATA3    | IPI00012901 | hsa:23414  | ZFPM2   | IPI00015802 | 34.548817 |
| hsa:7133   | TNFRSF1B | IPI00023501 | hsa:59269  | HIVEP3  | IPI00328089 | 34.548817 |
| hsa:10272  | FSTL3    | IPI00025155 | hsa:2660   | MSTN    | IPI00023751 | 34.548817 |
| hsa:473    | RERE     | IPI00185027 | hsa:7994   | MYST3   | IPI00023340 | 34.548817 |
| hsa:55888  | ZNF167   | IPI00479927 | hsa:54925  | ZNF434  | IPI00478574 | 34.548817 |
| hsa:79797  | ZNF408   | IPI00015481 | hsa:653121 | ZBTB8   | unknown     | 34.548817 |
| hsa:473    | RERE     | IPI00185027 | hsa:11143  | MYST2   | IPI00180764 | 34.548817 |
| hsa:2623   | GATA1    | IPI00013999 | hsa:7704   | ZBTB16  | IPI00305613 | 34.548817 |
| hsa:2624   | GATA2    | IPI00012900 | hsa:7704   | ZBTB16  | IPI00305613 | 34.548817 |
| hsa:10272  | FSTL3    | IPI00025155 | hsa:3624   | INHBA   | IPI00028670 | 34.548817 |
| hsa:3490   | IGFBP7   | IPI00016915 | hsa:3624   | INHBA   | IPI00028670 | 34.548817 |
| hsa:10468  | FST      | IPI00021081 | hsa:3624   | INHBA   | IPI00028670 | 34.548817 |
| hsa:51341  | ZBTB7A   | IPI00026317 | hsa:6667   | SP1     | IPI00465152 | 34.548817 |
| hsa:604    | BCL6     | IPI00012820 | hsa:6667   | SP1     | IPI00465152 | 34.548817 |
| hsa:5654   | HTRA1    | IPI00003176 | hsa:8200   | GDF5    | IPI00015522 | 34.548817 |
| hsa:5654   | HTRA1    | IPI00003176 | hsa:652    | BMP4    | IPI00292640 | 34.548817 |
| hsa:6678   | SPARC    | IPI00014572 | hsa:7040   | TGFB1   | IPI00000075 | 34.548817 |
| hsa:7718   | ZNF165   | IPI00029075 | hsa:11143  | MYST2   | IPI00180764 | 34.548817 |
| hsa:23049  | SMG1     | IPI00639874 | hsa:1003   | CDH5    | IPI00012792 | 34.548817 |
| hsa:7775   | ZNF232   | IPI00220290 | hsa:55663  | ZNF446  | IPI00016671 | 34.548817 |
| hsa:7718   | ZNF165   | IPI00029075 | hsa:55663  | ZNF446  | IPI00016671 | 34.548817 |
| hsa:7746   | ZNF193   | IPI00007330 | hsa:55663  | ZNF446  | IPI00016671 | 34.548817 |
| hsa:2623   | GATA1    | IPI00013999 | hsa:161882 | ZFPM1   | IPI00217346 | 34.548817 |
| hsa:2626   | GATA4    | IPI00020064 | hsa:23414  | ZFPM2   | IPI00015802 | 34.548817 |
| hsa:2623   | GATA1    | IPI00013999 | hsa:23414  | ZFPM2   | IPI00015802 | 34.548817 |
| hsa:124857 | WFIKKN2  | IPI00152847 | hsa:2660   | MSTN    | IPI00023751 | 34.548817 |
| hsa:7582   | ZNF33B   | IPI00168604 | hsa:11244  | ZHX1    | IPI00293086 | 34.548817 |
| hsa:58500  | ZNF250   | IPI00643611 | hsa:653121 | ZBTB8   | unknown     | 34.548817 |
| hsa:7718   | ZNF165   | IPI00029075 | hsa:11143  | MYST2   | IPI00180764 | 34.548817 |
| hsa:58500  | ZNF250   | IPI00643611 | hsa:653121 | ZBTB8   | unknown     | 34.548817 |
| hsa:79797  | ZNF408   | IPI00015481 | hsa:653121 | ZBTB8   | unknown     | 34.548817 |
| hsa:55888  | ZNF167   | IPI00479927 | hsa:54925  | ZNF434  | IPI00478574 | 34.548817 |
| hsa:7704   | ZNF145   | IPI00305613 | hsa:7572   | ZNF24   | IPI00306446 | 34.548817 |
| hsa:867    | CBL      | IPI00027269 | hsa:7535   | ZAP70   | IPI00329789 | 34.252995 |
| hsa:867    | CBL      | IPI00027269 | hsa:7297   | TYK2    | IPI00022353 | 34.252995 |
| hsa:867    | CBL      | IPI00027269 | hsa:6850   | SYK     | IPI00018597 | 34.252995 |
| hsa:2161   | F12      | IPI00019581 | hsa:3818   | KLKB1   | IPI00654888 | 34.240895 |
| hsa:8766   | RAB11A   | IPI00429190 | hsa:5866   | RAB3IL1 | IPI00328884 | 33.843739 |
| hsa:4952   | OCRL     | IPI00873093 | hsa:998    | CDC42   | IPI00007189 | 33.843739 |
| hsa:392    | ARHGAP1  | IPI00020567 | hsa:389    | RHOC    | IPI00027434 | 33.843739 |
| hsa:392    | ARHGAP1  | IPI00020567 | hsa:387    | RHOA    | IPI00478231 | 33.843739 |
| hsa:5864   | RAB3A    | IPI00023504 | hsa:5866   | RAB3IL1 | IPI00328884 | 33.843739 |
| hsa:5861   | RAB1A    | IPI00005719 | hsa:9950   | GOLGA5  | IPI00294065 | 33.843739 |
| hsa:5870   | RAB6A    | IPI00023526 | hsa:2803   | GOLGA4  | IPI00013272 | 33.843739 |
| hsa:10928  | RALBP1   | IPI00009544 | hsa:5899   | RALB    | IPI00004397 | 33.843739 |
| hsa:29127  | RACGAP1  | IPI00152946 | hsa:8153   | RND2    | IPI00001436 | 33.843739 |
| hsa:403    | ARL3     | IPI00003327 | hsa:2803   | GOLGA4  | IPI00013272 | 33.843739 |
| hsa:51291  | GMIP     | IPI00292376 | hsa:2669   | GEM     | IPI00022710 | 33.843739 |

|            |             |             |           |           |             |           |
|------------|-------------|-------------|-----------|-----------|-------------|-----------|
| hsa:4952   | OCRL        | IPI00873093 | hsa:5861  | RAB1A     | IPI00005719 | 33.843739 |
| hsa:4952   | OCRL        | IPI00873093 | hsa:5868  | RAB5A     | IPI00023510 | 33.843739 |
| hsa:4952   | OCRL        | IPI00873093 | hsa:5870  | RAB6A     | IPI00023526 | 33.843739 |
| hsa:4952   | OCRL        | IPI00873093 | hsa:4218  | RAB8A     | IPI00028481 | 33.843739 |
| hsa:4952   | OCRL        | IPI00873093 | hsa:51552 | RAB14     | IPI00291928 | 33.843739 |
| hsa:382    | ARF6        | IPI00215920 | hsa:1639  | DCTN1     | IPI00029485 | 33.843739 |
| hsa:4952   | OCRL        | IPI00873093 | hsa:5879  | RAC1      | IPI00010271 | 33.843739 |
| hsa:57514  | CDGAP       | IPI00297288 | hsa:5879  | RAC1      | IPI00010271 | 33.843739 |
| hsa:23616  | SH3BP157026 | IPI00456744 | hsa:5879  | RAC1      | IPI00010271 | 33.843739 |
| hsa:10928  | RALBP1      | IPI00009544 | hsa:5879  | RAC1      | IPI00010271 | 33.843739 |
| hsa:1123   | CHN1        | IPI00013488 | hsa:5879  | RAC1      | IPI00010271 | 33.843739 |
| hsa:10928  | RALBP1      | IPI00009544 | hsa:5898  | RALA      | IPI00217519 | 33.843739 |
| hsa:5870   | RAB6A       | IPI00023526 | hsa:1639  | DCTN1     | IPI00029485 | 33.843739 |
| hsa:57514  | CDGAP       | IPI00297288 | hsa:998   | CDC42     | IPI00007189 | 33.843739 |
| hsa:392    | ARHGAP1     | IPI00020567 | hsa:998   | CDC42     | IPI00007189 | 33.843739 |
| hsa:51762  | RAB8B       | IPI00024282 | hsa:7431  | VIM       | IPI00418471 | 33.843739 |
| hsa:23779  | ARHGAP8     | IPI00868745 | hsa:387   | RHOA      | IPI00478231 | 33.843739 |
| hsa:51291  | GMIP        | IPI00292376 | hsa:387   | RHOA      | IPI00478231 | 33.843739 |
| hsa:23616  | SH3BP157026 | IPI00456744 | hsa:387   | RHOA      | IPI00478231 | 33.843739 |
| hsa:29127  | RACGAP1     | IPI00152946 | hsa:4893  | NRAS      | IPI00000005 | 33.843739 |
| hsa:9411   | ARHGAP29    | IPI00152011 | hsa:5911  | RAP2A     | IPI00019346 | 33.843739 |
| hsa:400    | ARL1        | IPI00219518 | hsa:2803  | GOLGA4    | IPI00013272 | 33.843739 |
| hsa:1124   | CHN2        | IPI00428671 | hsa:5879  | RAC1      | IPI00010271 | 33.843739 |
| hsa:10928  | RALBP1      | IPI00009544 | hsa:5899  | RALB      | IPI00004397 | 33.843739 |
| hsa:392    | ARHGAP1     | IPI00020567 | hsa:387   | RHOA      | IPI00478231 | 33.843739 |
| hsa:392    | ARHGAP1     | IPI00020567 | hsa:389   | RHOC      | IPI00027434 | 33.843739 |
| hsa:8766   | RAB11A      | IPI00429190 | hsa:5866  | RAB3IL1   | IPI00328884 | 33.843739 |
| hsa:3265   | HRAS        | IPI00000006 | hsa:5293  | PIK3CD    | IPI00298410 | 33.192898 |
| hsa:3265   | HRAS        | IPI00000006 | hsa:5290  | PIK3CA    | IPI00031386 | 33.192898 |
| hsa:3845   | KRAS        | IPI00423568 | hsa:5294  | PIK3CG    | IPI00292690 | 33.192898 |
| hsa:3265   | HRAS        | IPI00000006 | hsa:5294  | PIK3CG    | IPI00292690 | 33.192898 |
| hsa:4893   | NRAS        | IPI00000005 | hsa:5290  | PIK3CA    | IPI00031386 | 33.192898 |
| hsa:23551  | RASD2       | IPI00304150 | hsa:5290  | PIK3CA    | IPI00031386 | 33.192898 |
| hsa:22808  | MRAS        | IPI00024166 | hsa:5290  | PIK3CA    | IPI00031386 | 33.192898 |
| hsa:3266   | ERAS        | IPI00375882 | hsa:5293  | PIK3CD    | IPI00298410 | 33.192898 |
| hsa:2335   | FN1         | IPI00022418 | hsa:4318  | MMP9      | IPI00027509 | 33.166864 |
| hsa:1490   | CTGF        | IPI00020977 | hsa:2335  | FN1       | IPI00022418 | 33.166864 |
| hsa:8839   | WISP2       | IPI00022052 | hsa:3482  | IGF2R     | IPI00289819 | 33.166864 |
| hsa:22808  | MRAS        | IPI00024166 | hsa:673   | BRAF      | IPI00303797 | 32.943639 |
| hsa:22808  | MRAS        | IPI00024166 | hsa:5894  | RAF1      | IPI00021786 | 32.943639 |
| hsa:6009   | RHEB        | IPI00016669 | hsa:5894  | RAF1      | IPI00021786 | 32.943639 |
| hsa:3911   | LAMA5       | IPI00783665 | hsa:4224  | MEP1A     | IPI00004372 | 32.727451 |
| hsa:5328   | PLAU        | IPI00296180 | hsa:3082  | HGF       | IPI00025767 | 32.655426 |
| hsa:5328   | PLAU        | IPI00296180 | hsa:5340  | PLG       | IPI00019580 | 32.655426 |
| hsa:115727 | RASGRP4     | IPI00291367 | hsa:3265  | HRAS      | IPI00000006 | 32.5455   |
| hsa:10125  | RASGRP1     | IPI00024733 | hsa:3265  | HRAS      | IPI00000006 | 32.5455   |
| hsa:10235  | RASGRP2     | IPI00329757 | hsa:3845  | KRAS      | IPI00423568 | 32.5455   |
| hsa:10235  | RASGRP2     | IPI00329757 | hsa:5906  | RAP1A     | IPI00019345 | 32.5455   |
| hsa:115727 | RASGRP4     | IPI00291367 | hsa:5906  | RAP1A     | IPI00019345 | 32.5455   |
| hsa:10235  | RASGRP2     | IPI00329757 | hsa:4893  | NRAS      | IPI00000005 | 32.5455   |
| hsa:8996   | NOL3        | IPI00105916 | hsa:8772  | FADD      | IPI00011919 | 31.191408 |
| hsa:835    | CASP2       | IPI00291570 | hsa:55367 | LRDD      | IPI00396438 | 31.191408 |
| hsa:317    | APAF1       | IPI00023630 | hsa:355   | FAS       | IPI00744894 | 31.191408 |
| hsa:8915   | BCL10       | IPI00022477 | hsa:8797  | TNFRSF10A | IPI00021975 | 31.191408 |
| hsa:329    | BIRC2       | IPI00013418 | hsa:8717  | TRADD     | IPI00018744 | 31.191408 |
| hsa:8915   | BCL10       | IPI00022477 | hsa:8717  | TRADD     | IPI00018744 | 31.191408 |
| hsa:8738   | CRADD       | IPI00020364 | hsa:55367 | LRDD      | IPI00396438 | 31.191408 |
| hsa:156    | ADRBK1      | IPI00012497 | hsa:2776  | GNAQ      | IPI00288947 | 30.960879 |
| hsa:2245   | FGD1        | IPI00024312 | hsa:998   | CDC42     | IPI00007189 | 30.516551 |
| hsa:3654   | IRAK1       | IPI00293652 | hsa:9618  | TRAF4     | IPI00162088 | 30.51634  |

|            |          |             |            |        |             |           |
|------------|----------|-------------|------------|--------|-------------|-----------|
| hsa:8737   | RIPK1    | IPI00013773 | hsa:7187   | TRAF3  | IPI00297473 | 30.51634  |
| hsa:8737   | RIPK1    | IPI00013773 | hsa:7188   | TRAF5  | IPI00005760 | 30.51634  |
| hsa:9649   | RALGPS1  | IPI00329517 | hsa:5898   | RALA   | IPI00217519 | 30.405645 |
| hsa:7409   | VAV1     | IPI00011696 | hsa:387    | RHOA   | IPI00478231 | 29.522727 |
| hsa:7409   | VAV1     | IPI00011696 | hsa:3265   | HRAS   | IPI00000006 | 29.522727 |
| hsa:7409   | VAV1     | IPI00011696 | hsa:391    | RHOG   | IPI00017342 | 29.522727 |
| hsa:7409   | VAV1     | IPI00011696 | hsa:998    | CDC42  | IPI00007189 | 29.522727 |
| hsa:7410   | VAV2     | IPI00446303 | hsa:391    | RHOG   | IPI00017342 | 29.522727 |
| hsa:7410   | VAV2     | IPI00446303 | hsa:387    | RHOA   | IPI00478231 | 29.522727 |
| hsa:7984   | ARHGEF5  | IPI00418545 | hsa:387    | RHOA   | IPI00478231 | 29.522727 |
| hsa:8874   | ARHGEF7  | IPI00449906 | hsa:5879   | RAC1   | IPI00010271 | 29.522727 |
| hsa:7410   | VAV2     | IPI00446303 | hsa:5879   | RAC1   | IPI00010271 | 29.522727 |
| hsa:7409   | VAV1     | IPI00011696 | hsa:5879   | RAC1   | IPI00010271 | 29.522727 |
| hsa:8874   | ARHGEF7  | IPI00449906 | hsa:998    | CDC42  | IPI00007189 | 29.522727 |
| hsa:9459   | ARHGEF6  | IPI00014256 | hsa:998    | CDC42  | IPI00007189 | 29.522727 |
| hsa:50649  | ARHGEF4  | IPI00154201 | hsa:387    | RHOA   | IPI00478231 | 29.522727 |
| hsa:5900   | RALGDS   | IPI00290395 | hsa:22800  | RRAS2  | IPI00012512 | 28.892525 |
| hsa:5900   | RALGDS   | IPI00290395 | hsa:6014   | RIT2   | IPI00163763 | 28.892525 |
| hsa:5900   | RALGDS   | IPI00290395 | hsa:6016   | RIT1   | IPI00144289 | 28.892525 |
| hsa:5900   | RALGDS   | IPI00290395 | hsa:22808  | MRAS   | IPI00024166 | 28.892525 |
| hsa:5900   | RALGDS   | IPI00290395 | hsa:3845   | KRAS   | IPI00423568 | 28.892525 |
| hsa:5900   | RALGDS   | IPI00290395 | hsa:3265   | HRAS   | IPI00000006 | 28.892525 |
| hsa:5900   | RALGDS   | IPI00290395 | hsa:5912   | RAP2B  | IPI00018364 | 28.892525 |
| hsa:5900   | RALGDS   | IPI00290395 | hsa:5911   | RAP2A  | IPI00019346 | 28.892525 |
| hsa:5900   | RALGDS   | IPI00290395 | hsa:5906   | RAP1A  | IPI00019345 | 28.892525 |
| hsa:5900   | RALGDS   | IPI00290395 | hsa:6237   | RRAS   | IPI00020418 | 28.892525 |
| hsa:23179  | RGL1     | IPI00396431 | hsa:6014   | RIT2   | IPI00163763 | 28.892525 |
| hsa:23179  | RGL1     | IPI00396431 | hsa:3265   | HRAS   | IPI00000006 | 28.892525 |
| hsa:11069  | RAPGEF4  | IPI00329560 | hsa:22800  | RRAS2  | IPI00012512 | 28.892525 |
| hsa:9771   | RAPGEF5  | IPI00412252 | hsa:5906   | RAP1A  | IPI00019345 | 28.892525 |
| hsa:23179  | RGL1     | IPI00396431 | hsa:6016   | RIT1   | IPI00144289 | 28.892525 |
| hsa:9771   | RAPGEF5  | IPI00412252 | hsa:22808  | MRAS   | IPI00024166 | 28.892525 |
| hsa:9771   | RAPGEF5  | IPI00412252 | hsa:5911   | RAP2A  | IPI00019346 | 28.892525 |
| hsa:9771   | RAPGEF5  | IPI00412252 | hsa:5912   | RAP2B  | IPI00018364 | 28.892525 |
| hsa:5863   | RGL2     | IPI00005656 | hsa:5908   | RAP1B  | IPI00015148 | 28.892525 |
| hsa:4983   | OPHN1    | IPI00001762 | hsa:387    | RHOA   | IPI00478231 | 28.525437 |
| hsa:55843  | ARHGAP15 | IPI00182116 | hsa:5879   | RAC1   | IPI00010271 | 28.525437 |
| hsa:4983   | OPHN1    | IPI00001762 | hsa:5879   | RAC1   | IPI00010271 | 28.525437 |
| hsa:4983   | OPHN1    | IPI00001762 | hsa:998    | CDC42  | IPI00007189 | 28.525437 |
| hsa:375    | ARF1     | IPI00215914 | hsa:7094   | TLN1   | IPI00298994 | 28.344131 |
| hsa:5928   | RBBP4    | IPI00328319 | hsa:121536 | AEBP2  | IPI00442167 | 27.639053 |
| hsa:5928   | RBBP4    | IPI00328319 | hsa:6670   | SP3    | IPI00025807 | 27.639053 |
| hsa:23291  | FBXW11   | IPI00328796 | hsa:2736   | GLI2   | IPI00784005 | 27.639053 |
| hsa:7088   | TLE1     | IPI00413270 | hsa:55734  | ZFP64  | IPI00018906 | 27.639053 |
| hsa:7088   | TLE1     | IPI00413270 | hsa:639    | PRDM1  | IPI00337575 | 27.639053 |
| hsa:8726   | EED      | IPI00432040 | hsa:121536 | AEBP2  | IPI00442167 | 27.639053 |
| hsa:8726   | EED      | IPI00432040 | hsa:7528   | YY1    | IPI00014513 | 27.639053 |
| hsa:7089   | TLE2     | IPI00297659 | hsa:639    | PRDM1  | IPI00337575 | 27.639053 |
| hsa:5931   | RBBP7    | IPI00395865 | hsa:7189   | TRAF6  | IPI00743663 | 27.639053 |
| hsa:9391   | CIAO1    | IPI00008791 | hsa:26993  | AKAP8L | IPI00297455 | 27.639053 |
| hsa:11171  | STRAP    | IPI00294536 | hsa:7189   | TRAF6  | IPI00743663 | 27.639053 |
| hsa:8726   | EED      | IPI00432040 | hsa:23512  | SUZ12  | IPI00299526 | 27.639053 |
| hsa:5928   | RBBP4    | IPI00328319 | hsa:23512  | SUZ12  | IPI00299526 | 27.639053 |
| hsa:55339  | WDR33    | IPI00106567 | hsa:7704   | ZBTB16 | IPI00305613 | 27.639053 |
| hsa:5928   | RBBP4    | IPI00328319 | hsa:6667   | SP1    | IPI00465152 | 27.639053 |
| hsa:9391   | CIAO1    | IPI00008791 | hsa:7490   | WT1    | IPI00215679 | 27.639053 |
| hsa:149465 | WDR65    | IPI00043302 | hsa:7186   | TRAF2  | IPI00030278 | 27.639053 |
| hsa:55339  | WDR33    | IPI00106567 | hsa:11143  | MYST2  | IPI00180764 | 27.639053 |
| hsa:55339  | WDR33    | IPI00106567 | hsa:11244  | ZHX1   | IPI00293086 | 27.639053 |
| hsa:23005  | MAPKBP1  | IPI00782945 | hsa:54840  | APTX   | IPI00420029 | 27.639053 |

|            |             |             |           |              |             |           |
|------------|-------------|-------------|-----------|--------------|-------------|-----------|
| hsa:55054  | ATG16L1     | IPI00470446 | hsa:8517  | IKBKG        | IPI00002411 | 27.639053 |
| hsa:1314   | COPA        | IPI00295857 | hsa:8517  | IKBKG        | IPI00002411 | 27.639053 |
| hsa:10399  | GNB2L1      | IPI00848226 | hsa:8517  | IKBKG        | IPI00002411 | 27.639053 |
| hsa:8668   | EIF3I       | IPI00012795 | hsa:7189  | TRAF6        | IPI00743663 | 27.639053 |
| hsa:9184   | BUB3        | IPI00013468 | hsa:7189  | TRAF6        | IPI00743663 | 27.639053 |
| hsa:2783   | GNB2        | IPI00003348 | hsa:7189  | TRAF6        | IPI00743663 | 27.639053 |
| hsa:55339  | WDR33       | IPI00106567 | hsa:11143 | MYST2        | IPI00180764 | 27.639053 |
| hsa:55339  | WDR33       | IPI00106567 | hsa:11244 | ZHX1         | IPI00293086 | 27.639053 |
| hsa:55339  | WDR33       | IPI00106567 | hsa:7704  | ZNF145       | IPI00305613 | 27.639053 |
| hsa:7088   | TLE1        | IPI00413270 | hsa:55734 | ZFP64        | IPI00018906 | 27.639053 |
| hsa:3083   | HGFAC       | IPI00029193 | hsa:3818  | KLKB1        | IPI00654888 | 27.627942 |
| hsa:868    | CBLB        | IPI00292856 | hsa:5336  | PLCG2        | IPI00329185 | 27.532236 |
| hsa:868    | CBLB        | IPI00292856 | hsa:7409  | VAV1         | IPI00011696 | 27.275634 |
| hsa:4627   | MYH9        | IPI00019502 | hsa:10398 | MYL9         | IPI00220278 | 26.322908 |
| hsa:4163   | MCC         | IPI00011957 | hsa:3954  | LETM1        | IPI00017592 | 26.322908 |
| hsa:4627   | MYH9        | IPI00019502 | hsa:6286  | S100P        | IPI00017526 | 26.322908 |
| hsa:2803   | GOLGA4      | IPI00013272 | hsa:23499 | MACF1        | IPI00432363 | 26.322908 |
| hsa:4628   | MYH10       | IPI00397526 | hsa:6275  | S100A4       | IPI00032313 | 26.322908 |
| hsa:4627   | MYH9        | IPI00019502 | hsa:6275  | S100A4       | IPI00032313 | 26.322908 |
| hsa:3161   | HMMR        | IPI00337325 | hsa:801   | CALM1        | unknown     | 26.322908 |
| hsa:10142  | AKAP9       | IPI00019223 | hsa:808   | CALM3        | unknown     | 26.322908 |
| hsa:5116   | PCNT        | IPI00479143 | hsa:805   | CALM2801     | IPI00075248 | 26.322908 |
| hsa:85444  | LRRCC1      | IPI00807727 | hsa:826   | CAPNS1       | IPI00025084 | 26.322908 |
| hsa:55755  | CDK5RAP2    | IPI00329038 | hsa:9185  | REPS2        | IPI00382936 | 26.322908 |
| hsa:10142  | AKAP9       | IPI00019223 | hsa:5523  | PPP2R3A      | IPI00029144 | 26.322908 |
| hsa:79571  | GCC1        | IPI00165138 | hsa:22981 | RP4-691N24.1 | IPI00294173 | 26.322908 |
| hsa:8379   | MAD1L1      | IPI00470518 | hsa:22981 | RP4-691N24.1 | IPI00294173 | 26.322908 |
| hsa:3798   | KIF5A       | IPI00029722 | hsa:6453  | ITSN1        | IPI00304740 | 26.322908 |
| hsa:4163   | MCC         | IPI00011957 | hsa:10627 | MRCL3        | IPI00220573 | 26.322908 |
| hsa:8379   | MAD1L1      | IPI00470518 | hsa:22981 | KIAA0980     | IPI00294173 | 26.322908 |
| hsa:4627   | MYH9        | IPI00019502 | hsa:10398 | MYL9         | IPI00220278 | 26.322908 |
| hsa:79571  | GCC1        | IPI00165138 | hsa:22981 | KIAA0980     | IPI00294173 | 26.322908 |
| hsa:3798   | KIF5A       | IPI00029722 | hsa:6453  | ITSN1        | IPI00304740 | 26.322908 |
| hsa:3556   | IL1RAP      | IPI00031789 | hsa:4615  | MYD88        | IPI00383890 | 26.209447 |
| hsa:3556   | IL1RAP      | IPI00031789 | hsa:3654  | IRAK1        | IPI00293652 | 26.209447 |
| hsa:3554   | IL1R1       | IPI00027508 | hsa:4615  | MYD88        | IPI00383890 | 26.209447 |
| hsa:4615   | MYD88       | IPI00383890 | hsa:51135 | IRAK4        | IPI00007641 | 26.209447 |
| hsa:4615   | MYD88       | IPI00383890 | hsa:11213 | IRAK3        | IPI00026984 | 26.209447 |
| hsa:4615   | MYD88       | IPI00383890 | hsa:3656  | IRAK2        | IPI00304986 | 26.209447 |
| hsa:353376 | TICAM251014 | IPI00428967 | hsa:51135 | IRAK4        | IPI00007641 | 26.209447 |
| hsa:353376 | TICAM251014 | IPI00428967 | hsa:11213 | IRAK3        | IPI00026984 | 26.209447 |
| hsa:7099   | TLR4        | IPI00008673 | hsa:3654  | IRAK1        | IPI00293652 | 26.209447 |
| hsa:353376 | TICAM251014 | IPI00428967 | hsa:3654  | IRAK1        | IPI00293652 | 26.209447 |
| hsa:7097   | TLR2        | IPI00019006 | hsa:3654  | IRAK1        | IPI00293652 | 26.209447 |
| hsa:4615   | MYD88       | IPI00383890 | hsa:3654  | IRAK1        | IPI00293652 | 26.209447 |
| hsa:4615   | MYD88       | IPI00383890 | hsa:8772  | FADD         | IPI00011919 | 26.209447 |
| hsa:148022 | TICAM1      | IPI00398285 | hsa:8737  | RIPK1        | IPI00013773 | 26.209447 |
| hsa:114609 | TIRAP       | IPI00718966 | hsa:4615  | MYD88        | IPI00383890 | 26.209447 |
| hsa:7099   | TLR4        | IPI00008673 | hsa:3656  | IRAK2        | IPI00304986 | 26.209447 |
| hsa:353376 | TICAM251014 | IPI00428967 | hsa:3656  | IRAK2        | IPI00304986 | 26.209447 |
| hsa:114609 | TIRAP       | IPI00718966 | hsa:3656  | IRAK2        | IPI00304986 | 26.209447 |
| hsa:4804   | NGFR        | IPI00027436 | hsa:7189  | TRAF6        | IPI00743663 | 26.023495 |
| hsa:4804   | NGFR        | IPI00027436 | hsa:7186  | TRAF2        | IPI00030278 | 26.023495 |
| hsa:7253   | TSHR        | IPI00744312 | hsa:2770  | GNAI1        | IPI00337415 | 25.659599 |
| hsa:7253   | TSHR        | IPI00744312 | hsa:2771  | GNAI2        | IPI00748145 | 25.659599 |
| hsa:7253   | TSHR        | IPI00744312 | hsa:2775  | GNAO1        | IPI00220281 | 25.659599 |
| hsa:7253   | TSHR        | IPI00744312 | hsa:10672 | GNA13        | IPI00290928 | 25.659599 |
| hsa:7253   | TSHR        | IPI00744312 | hsa:2768  | GNA12        | IPI00328744 | 25.659599 |
| hsa:7253   | TSHR        | IPI00744312 | hsa:2767  | GNA11        | IPI00305551 | 25.659599 |
| hsa:7253   | TSHR        | IPI00744312 | hsa:2773  | GNAI3        | IPI00220578 | 25.659599 |



|           |        |             |          |       |             |           |
|-----------|--------|-------------|----------|-------|-------------|-----------|
| hsa:7253  | TSHR   | IPI00744312 | hsa:2776 | GNAQ  | IPI00288947 | 25.659599 |
| hsa:7253  | TSHR   | IPI00744312 | hsa:2778 | GNAS  | IPI00009881 | 25.659599 |
| hsa:147   | ADRA1B | IPI00218912 | hsa:2776 | GNAQ  | IPI00288947 | 25.659599 |
| hsa:147   | ADRA1B | IPI00218912 | hsa:2767 | GNAI1 | IPI00305551 | 25.659599 |
| hsa:186   | AGTR2  | IPI00029486 | hsa:2773 | GNAI3 | IPI00220578 | 25.659599 |
| hsa:186   | AGTR2  | IPI00029486 | hsa:2771 | GNAI2 | IPI00748145 | 25.659599 |
| hsa:624   | BDKRB2 | IPI00026534 | hsa:2767 | GNAI1 | IPI00305551 | 25.659599 |
| hsa:1234  | CCR5   | IPI00807387 | hsa:2770 | GNAI1 | IPI00337415 | 25.659599 |
| hsa:1234  | CCR5   | IPI00807387 | hsa:2776 | GNAQ  | IPI00288947 | 25.659599 |
| hsa:1234  | CCR5   | IPI00807387 | hsa:2773 | GNAI3 | IPI00220578 | 25.659599 |
| hsa:1234  | CCR5   | IPI00807387 | hsa:2771 | GNAI2 | IPI00748145 | 25.659599 |
| hsa:1234  | CCR5   | IPI00807387 | hsa:2775 | GNAO1 | IPI00220281 | 25.659599 |
| hsa:150   | ADRA2A | IPI00797870 | hsa:2771 | GNAI2 | IPI00748145 | 25.659599 |
| hsa:150   | ADRA2A | IPI00797870 | hsa:2775 | GNAO1 | IPI00220281 | 25.659599 |
| hsa:150   | ADRA2A | IPI00797870 | hsa:2770 | GNAI1 | IPI00337415 | 25.659599 |
| hsa:152   | ADRA2C | IPI00002437 | hsa:2775 | GNAO1 | IPI00220281 | 25.659599 |
| hsa:151   | ADRA2B | IPI00297315 | hsa:2771 | GNAI2 | IPI00748145 | 25.659599 |
| hsa:2357  | FPR1   | IPI00328644 | hsa:2771 | GNAI2 | IPI00748145 | 25.659599 |
| hsa:134   | ADORA1 | IPI00026872 | hsa:2771 | GNAI2 | IPI00748145 | 25.659599 |
| hsa:134   | ADORA1 | IPI00026872 | hsa:2778 | GNAS  | IPI00009881 | 25.659599 |
| hsa:134   | ADORA1 | IPI00026872 | hsa:2775 | GNAO1 | IPI00220281 | 25.659599 |
| hsa:134   | ADORA1 | IPI00026872 | hsa:2781 | GNAZ  | IPI00328128 | 25.659599 |
| hsa:1813  | DRD2   | IPI00026590 | hsa:2773 | GNAI3 | IPI00220578 | 25.659599 |
| hsa:3579  | IL8RB  | IPI00012320 | hsa:2773 | GNAI3 | IPI00220578 | 25.659599 |
| hsa:3579  | IL8RB  | IPI00012320 | hsa:9630 | GNA14 | IPI00000695 | 25.659599 |
| hsa:3579  | IL8RB  | IPI00012320 | hsa:2769 | GNA15 | IPI00027243 | 25.659599 |
| hsa:4985  | OPRD1  | IPI00298305 | hsa:2769 | GNA15 | IPI00027243 | 25.659599 |
| hsa:154   | ADRB2  | IPI00465066 | hsa:9630 | GNA14 | IPI00000695 | 25.659599 |
| hsa:154   | ADRB2  | IPI00465066 | hsa:2769 | GNA15 | IPI00027243 | 25.659599 |
| hsa:4988  | OPRM1  | IPI00873573 | hsa:2769 | GNA15 | IPI00027243 | 25.659599 |
| hsa:1268  | CNR1   | IPI00009396 | hsa:2769 | GNA15 | IPI00027243 | 25.659599 |
| hsa:2149  | F2R    | IPI00296869 | hsa:2779 | GNAT1 | IPI00218488 | 25.659599 |
| hsa:643   | BLR1   | IPI00027955 | hsa:2771 | GNAI2 | IPI00748145 | 25.659599 |
| hsa:643   | BLR1   | IPI00027955 | hsa:2775 | GNAO1 | IPI00220281 | 25.659599 |
| hsa:643   | BLR1   | IPI00027955 | hsa:2776 | GNAQ  | IPI00288947 | 25.659599 |
| hsa:7852  | CXCR4  | IPI00028159 | hsa:2770 | GNAI1 | IPI00337415 | 25.659599 |
| hsa:8698  | EDG6   | IPI00021534 | hsa:2770 | GNAI1 | IPI00337415 | 25.659599 |
| hsa:1814  | DRD3   | IPI00018843 | hsa:2770 | GNAI1 | IPI00337415 | 25.659599 |
| hsa:59340 | HRH4   | IPI00023596 | hsa:2770 | GNAI1 | IPI00337415 | 25.659599 |
| hsa:53637 | EDG8   | IPI00006152 | hsa:2770 | GNAI1 | IPI00337415 | 25.659599 |
| hsa:9294  | EDG5   | IPI00003501 | hsa:2770 | GNAI1 | IPI00337415 | 25.659599 |
| hsa:2864  | FFAR1  | IPI00024206 | hsa:2770 | GNAI1 | IPI00337415 | 25.659599 |
| hsa:1901  | EDG1   | IPI00015343 | hsa:2770 | GNAI1 | IPI00337415 | 25.659599 |
| hsa:1903  | EDG3   | IPI00015983 | hsa:2770 | GNAI1 | IPI00337415 | 25.659599 |
| hsa:2825  | GPR1   | IPI00004345 | hsa:2770 | GNAI1 | IPI00337415 | 25.659599 |
| hsa:4988  | OPRM1  | IPI00873573 | hsa:2770 | GNAI1 | IPI00337415 | 25.659599 |
| hsa:7433  | VIPR1  | IPI00027680 | hsa:2770 | GNAI1 | IPI00337415 | 25.659599 |
| hsa:6753  | SSTR3  | IPI00030283 | hsa:2770 | GNAI1 | IPI00337415 | 25.659599 |
| hsa:6752  | SSTR2  | IPI00027807 | hsa:2770 | GNAI1 | IPI00337415 | 25.659599 |
| hsa:3356  | HTR2A  | IPI00002185 | hsa:2770 | GNAI1 | IPI00337415 | 25.659599 |
| hsa:4985  | OPRD1  | IPI00298305 | hsa:2770 | GNAI1 | IPI00337415 | 25.659599 |
| hsa:1268  | CNR1   | IPI00009396 | hsa:2770 | GNAI1 | IPI00337415 | 25.659599 |
| hsa:1909  | EDNRA  | IPI00434353 | hsa:2767 | GNAI1 | IPI00305551 | 25.659599 |
| hsa:5739  | PTGIR  | IPI00016317 | hsa:2767 | GNAI1 | IPI00305551 | 25.659599 |
| hsa:1910  | EDNRB  | IPI00029123 | hsa:2767 | GNAI1 | IPI00305551 | 25.659599 |
| hsa:3357  | HTR2B  | IPI00015134 | hsa:2767 | GNAI1 | IPI00305551 | 25.659599 |
| hsa:4543  | MTNR1A | IPI00007600 | hsa:2767 | GNAI1 | IPI00305551 | 25.659599 |
| hsa:6915  | TBXA2R | IPI00010309 | hsa:2767 | GNAI1 | IPI00305551 | 25.659599 |
| hsa:3356  | HTR2A  | IPI00002185 | hsa:2767 | GNAI1 | IPI00305551 | 25.659599 |
| hsa:1129  | CHRM2  | IPI00027473 | hsa:2767 | GNAI1 | IPI00305551 | 25.659599 |

|           |             |             |           |       |             |           |
|-----------|-------------|-------------|-----------|-------|-------------|-----------|
| hsa:154   | ADRB2       | IPI00465066 | hsa:2767  | GNA11 | IPI00305551 | 25.659599 |
| hsa:623   | BDKRB1      | IPI00296538 | hsa:2776  | GNAQ  | IPI00288947 | 25.659599 |
| hsa:5739  | PTGIR       | IPI00016317 | hsa:2776  | GNAQ  | IPI00288947 | 25.659599 |
| hsa:9294  | EDG5        | IPI00003501 | hsa:2776  | GNAQ  | IPI00288947 | 25.659599 |
| hsa:2867  | FFAR2       | IPI00007366 | hsa:2776  | GNAQ  | IPI00288947 | 25.659599 |
| hsa:2864  | FFAR1       | IPI00024206 | hsa:2776  | GNAQ  | IPI00288947 | 25.659599 |
| hsa:8811  | GALR2       | IPI00013353 | hsa:2776  | GNAQ  | IPI00288947 | 25.659599 |
| hsa:1903  | EDG3        | IPI00015983 | hsa:2776  | GNAQ  | IPI00288947 | 25.659599 |
| hsa:3357  | HTR2B       | IPI00015134 | hsa:2776  | GNAQ  | IPI00288947 | 25.659599 |
| hsa:3362  | HTR6        | IPI00032009 | hsa:2776  | GNAQ  | IPI00288947 | 25.659599 |
| hsa:3356  | HTR2A       | IPI00002185 | hsa:2776  | GNAQ  | IPI00288947 | 25.659599 |
| hsa:3358  | HTR2C       | IPI00002876 | hsa:2776  | GNAQ  | IPI00288947 | 25.659599 |
| hsa:6915  | TBXA2R      | IPI00010309 | hsa:2776  | GNAQ  | IPI00288947 | 25.659599 |
| hsa:7433  | VIPR1       | IPI00027680 | hsa:2776  | GNAQ  | IPI00288947 | 25.659599 |
| hsa:1131  | CHRM3730413 | IPI00023456 | hsa:2776  | GNAQ  | IPI00288947 | 25.659599 |
| hsa:53637 | EDG8        | IPI00006152 | hsa:2768  | GNA12 | IPI00328744 | 25.659599 |
| hsa:8698  | EDG6        | IPI00021534 | hsa:2768  | GNA12 | IPI00328744 | 25.659599 |
| hsa:6915  | TBXA2R      | IPI00010309 | hsa:2768  | GNA12 | IPI00328744 | 25.659599 |
| hsa:2149  | F2R         | IPI00296869 | hsa:2768  | GNA12 | IPI00328744 | 25.659599 |
| hsa:1816  | DRD5        | IPI00011227 | hsa:2768  | GNA12 | IPI00328744 | 25.659599 |
| hsa:1816  | DRD5        | IPI00011227 | hsa:2781  | GNAZ  | IPI00328128 | 25.659599 |
| hsa:1813  | DRD2        | IPI00026590 | hsa:2781  | GNAZ  | IPI00328128 | 25.659599 |
| hsa:4985  | OPRD1       | IPI00298305 | hsa:2781  | GNAZ  | IPI00328128 | 25.659599 |
| hsa:59340 | HRH4        | IPI00023596 | hsa:2775  | GNA01 | IPI00220281 | 25.659599 |
| hsa:53637 | EDG8        | IPI00006152 | hsa:2775  | GNA01 | IPI00220281 | 25.659599 |
| hsa:2867  | FFAR2       | IPI00007366 | hsa:2775  | GNA01 | IPI00220281 | 25.659599 |
| hsa:4988  | OPRM1       | IPI00873573 | hsa:2775  | GNA01 | IPI00220281 | 25.659599 |
| hsa:4985  | OPRD1       | IPI00298305 | hsa:2775  | GNA01 | IPI00220281 | 25.659599 |
| hsa:5739  | PTGIR       | IPI00016317 | hsa:2778  | GNAS  | IPI00009881 | 25.659599 |
| hsa:5729  | PTGDR       | IPI00012371 | hsa:2778  | GNAS  | IPI00009881 | 25.659599 |
| hsa:3362  | HTR6        | IPI00032009 | hsa:2778  | GNAS  | IPI00009881 | 25.659599 |
| hsa:554   | AVPR2       | IPI00026823 | hsa:2778  | GNAS  | IPI00009881 | 25.659599 |
| hsa:7433  | VIPR1       | IPI00027680 | hsa:2778  | GNAS  | IPI00009881 | 25.659599 |
| hsa:3973  | LHCGR       | IPI00299615 | hsa:2778  | GNAS  | IPI00009881 | 25.659599 |
| hsa:155   | ADRB3       | IPI00011286 | hsa:2778  | GNAS  | IPI00009881 | 25.659599 |
| hsa:3579  | IL8RB       | IPI00012320 | hsa:2771  | GNAI2 | IPI00748145 | 25.659599 |
| hsa:23566 | EDG7        | IPI00015940 | hsa:2771  | GNAI2 | IPI00748145 | 25.659599 |
| hsa:4543  | MTNR1A      | IPI00007600 | hsa:2771  | GNAI2 | IPI00748145 | 25.659599 |
| hsa:64805 | P2RY12      | IPI00009729 | hsa:2771  | GNAI2 | IPI00748145 | 25.659599 |
| hsa:4988  | OPRM1       | IPI00873573 | hsa:2771  | GNAI2 | IPI00748145 | 25.659599 |
| hsa:2149  | F2R         | IPI00296869 | hsa:2771  | GNAI2 | IPI00748145 | 25.659599 |
| hsa:4985  | OPRD1       | IPI00298305 | hsa:2771  | GNAI2 | IPI00748145 | 25.659599 |
| hsa:3973  | LHCGR       | IPI00299615 | hsa:2771  | GNAI2 | IPI00748145 | 25.659599 |
| hsa:3577  | IL8RA       | IPI00296618 | hsa:2771  | GNAI2 | IPI00748145 | 25.659599 |
| hsa:1909  | EDNRA       | IPI00434353 | hsa:2771  | GNAI2 | IPI00748145 | 25.659599 |
| hsa:1813  | DRD2        | IPI00026590 | hsa:2771  | GNAI2 | IPI00748145 | 25.659599 |
| hsa:1128  | CHRM1       | IPI00298980 | hsa:2771  | GNAI2 | IPI00748145 | 25.659599 |
| hsa:728   | C5AR1       | IPI00010308 | hsa:2771  | GNAI2 | IPI00748145 | 25.659599 |
| hsa:1268  | CNR1        | IPI00009396 | hsa:2771  | GNAI2 | IPI00748145 | 25.659599 |
| hsa:3350  | HTR1A       | IPI00031686 | hsa:2773  | GNAI3 | IPI00220578 | 25.659599 |
| hsa:1902  | EDG2        | IPI00022525 | hsa:2773  | GNAI3 | IPI00220578 | 25.659599 |
| hsa:1901  | EDG1        | IPI00015343 | hsa:2773  | GNAI3 | IPI00220578 | 25.659599 |
| hsa:4543  | MTNR1A      | IPI00007600 | hsa:2773  | GNAI3 | IPI00220578 | 25.659599 |
| hsa:1268  | CNR1        | IPI00009396 | hsa:2773  | GNAI3 | IPI00220578 | 25.659599 |
| hsa:1903  | EDG3        | IPI00015983 | hsa:10672 | GNA13 | IPI00290928 | 25.659599 |
| hsa:2840  | GPR17       | IPI00012717 | hsa:10672 | GNA13 | IPI00290928 | 25.659599 |
| hsa:1910  | EDNRB       | IPI00029123 | hsa:10672 | GNA13 | IPI00290928 | 25.659599 |
| hsa:9294  | EDG5        | IPI00003501 | hsa:10672 | GNA13 | IPI00290928 | 25.659599 |
| hsa:8698  | EDG6        | IPI00021534 | hsa:10672 | GNA13 | IPI00290928 | 25.659599 |
| hsa:4543  | MTNR1A      | IPI00007600 | hsa:10672 | GNA13 | IPI00290928 | 25.659599 |

|            |           |             |            |             |             |           |
|------------|-----------|-------------|------------|-------------|-------------|-----------|
| hsa:7852   | CXCR4     | IPI00028159 | hsa:10672  | GNA13       | IPI00290928 | 25.659599 |
| hsa:6915   | TBXA2R    | IPI00010309 | hsa:10672  | GNA13       | IPI00290928 | 25.659599 |
| hsa:2149   | F2R       | IPI00296869 | hsa:10672  | GNA13       | IPI00290928 | 25.659599 |
| hsa:1816   | DRD5      | IPI00011227 | hsa:10672  | GNA13       | IPI00290928 | 25.659599 |
| hsa:59340  | HRH4      | IPI00023596 | hsa:2769   | GNA15       | IPI00027243 | 25.659599 |
| hsa:1269   | CNR2      | IPI00003060 | hsa:2769   | GNA15       | IPI00027243 | 25.659599 |
| hsa:1241   | LTB4R     | IPI00019382 | hsa:2769   | GNA15       | IPI00027243 | 25.659599 |
| hsa:2149   | F2R       | IPI00296869 | hsa:2769   | GNA15       | IPI00027243 | 25.659599 |
| hsa:4986   | OPRK1     | IPI00012735 | hsa:2769   | GNA15       | IPI00027243 | 25.659599 |
| hsa:3577   | IL8RA     | IPI00296618 | hsa:2769   | GNA15       | IPI00027243 | 25.659599 |
| hsa:1129   | CHRM2     | IPI00027473 | hsa:2769   | GNA15       | IPI00027243 | 25.659599 |
| hsa:6752   | SSTR2     | IPI00027807 | hsa:9630   | GNA14       | IPI00000695 | 25.659599 |
| hsa:4987   | OPRL1     | IPI00012736 | hsa:9630   | GNA14       | IPI00000695 | 25.659599 |
| hsa:3577   | IL8RA     | IPI00296618 | hsa:9630   | GNA14       | IPI00000695 | 25.659599 |
| hsa:1230   | CCR1      | IPI00027685 | hsa:9630   | GNA14       | IPI00000695 | 25.659599 |
| hsa:1129   | CHRM2     | IPI00027473 | hsa:9630   | GNA14       | IPI00000695 | 25.659599 |
| hsa:57522  | SRGAP1    | IPI00376259 | hsa:387    | RHOA        | IPI00478231 | 25.584255 |
| hsa:57522  | SRGAP1    | IPI00376259 | hsa:998    | CDC42       | IPI00007189 | 25.584255 |
| hsa:393    | ARHGAP4   | IPI00398854 | hsa:4893   | NRAS        | IPI00000005 | 25.584255 |
| hsa:51311  | TLR8      | IPI00009910 | hsa:4615   | MYD88       | IPI00383890 | 25.443587 |
| hsa:51284  | TLR7      | IPI00009812 | hsa:4615   | MYD88       | IPI00383890 | 25.443587 |
| hsa:81793  | TLR10     | IPI00008887 | hsa:4615   | MYD88       | IPI00383890 | 25.443587 |
| hsa:7100   | TLR5      | IPI00298758 | hsa:4615   | MYD88       | IPI00383890 | 25.443587 |
| hsa:7097   | TLR2      | IPI00019006 | hsa:4615   | MYD88       | IPI00383890 | 25.443587 |
| hsa:7099   | TLR4      | IPI00008673 | hsa:4615   | MYD88       | IPI00383890 | 25.443587 |
| hsa:7098   | TLR3      | IPI00019007 | hsa:4615   | MYD88       | IPI00383890 | 25.443587 |
| hsa:2314   | FLII      | IPI00031023 | hsa:4615   | MYD88       | IPI00383890 | 24.677726 |
| hsa:7097   | TLR2      | IPI00019006 | hsa:148022 | TICAM1      | IPI00398285 | 24.677726 |
| hsa:7097   | TLR2      | IPI00019006 | hsa:10333  | TLR6        | IPI00294125 | 24.677726 |
| hsa:7097   | TLR2      | IPI00019006 | hsa:7096   | TLR1        | IPI00090764 | 24.677726 |
| hsa:7099   | TLR4      | IPI00008673 | hsa:7096   | TLR1        | IPI00090764 | 24.677726 |
| hsa:7098   | TLR3      | IPI00019007 | hsa:148022 | TICAM1      | IPI00398285 | 24.677726 |
| hsa:7099   | TLR4      | IPI00008673 | hsa:353376 | TICAM251014 | IPI00428967 | 24.677726 |
| hsa:7098   | TLR3      | IPI00019007 | hsa:353376 | TICAM251014 | IPI00428967 | 24.677726 |
| hsa:7099   | TLR4      | IPI00008673 | hsa:114609 | TIRAP       | IPI00718966 | 24.677726 |
| hsa:81793  | TLR10     | IPI00008887 | hsa:7096   | TLR1        | IPI00090764 | 24.677726 |
| hsa:54106  | TLR911344 | IPI00010140 | hsa:7096   | TLR1        | IPI00090764 | 24.677726 |
| hsa:7100   | TLR5      | IPI00298758 | hsa:7096   | TLR1        | IPI00090764 | 24.677726 |
| hsa:9826   | ARHGAF11  | IPI00157442 | hsa:387    | RHOA        | IPI00478231 | 24.452881 |
| hsa:23365  | ARHGAF12  | IPI00339353 | hsa:387    | RHOA        | IPI00478231 | 24.452881 |
| hsa:5327   | PLAT      | IPI00019590 | hsa:5340   | PLG         | IPI00019580 | 24.131389 |
| hsa:1107   | CHD3      | IPI00373870 | hsa:7341   | SUMO1       | IPI00303105 | 24.033959 |
| hsa:5371   | PML       | IPI00022348 | hsa:7341   | SUMO1       | IPI00303105 | 24.033959 |
| hsa:672    | BRCA1     | IPI00218982 | hsa:7314   | UBB         | unknown     | 24.033959 |
| hsa:4193   | MDM2      | IPI00025490 | hsa:7314   | UBB         | unknown     | 24.033959 |
| hsa:4193   | MDM2      | IPI00025490 | hsa:56893  | UBQLN4      | IPI00024502 | 24.033959 |
| hsa:4591   | TRIM37    | IPI00016619 | hsa:7314   | UBB         | unknown     | 24.033959 |
| hsa:7186   | TRAF2     | IPI00030278 | hsa:56893  | UBQLN4      | IPI00024502 | 24.033959 |
| hsa:7186   | TRAF2     | IPI00030278 | hsa:5886   | RAD23A      | IPI00008219 | 24.033959 |
| hsa:7186   | TRAF2     | IPI00030278 | hsa:7755   | ZNF205      | IPI00029377 | 24.033959 |
| hsa:7755   | ZNF205    | IPI00029377 | hsa:56893  | UBQLN4      | IPI00024502 | 24.033959 |
| hsa:113878 | DTX2      | IPI00292746 | hsa:56893  | UBQLN4      | IPI00024502 | 24.033959 |
| hsa:10551  | AGR2      | IPI00007427 | hsa:56893  | UBQLN4      | IPI00024502 | 24.033959 |
| hsa:672    | BRCA1     | IPI00218982 | hsa:5887   | RAD23B      | IPI00008223 | 24.033959 |
| hsa:1840   | DTX1      | IPI00004554 | hsa:7314   | UBB         | unknown     | 24.033959 |
| hsa:4194   | MDM4      | IPI00005170 | hsa:7314   | UBB         | unknown     | 24.033959 |
| hsa:7189   | TRAF6     | IPI00743663 | hsa:4738   | NEDD8       | IPI00020008 | 24.033959 |
| hsa:56658  | TRIM39    | IPI00873841 | hsa:80019  | UBTD1       | IPI00017227 | 24.033959 |
| hsa:165918 | RNF168    | IPI00217899 | hsa:7314   | UBB         | unknown     | 24.033959 |
| hsa:8554   | PIAS1     | IPI00220424 | hsa:7341   | SUMO1       | IPI00303105 | 24.033959 |

|           |              |             |            |            |             |           |
|-----------|--------------|-------------|------------|------------|-------------|-----------|
| hsa:10210 | TOPORS       | IPI00396077 | hsa:7341   | SUM01      | IPI00303105 | 24.033959 |
| hsa:8805  | TRIM24       | IPI00005184 | hsa:7341   | SUM01      | IPI00303105 | 24.033959 |
| hsa:4193  | MDM2         | IPI00025490 | hsa:7341   | SUM01      | IPI00303105 | 24.033959 |
| hsa:329   | BIRC2        | IPI00013418 | hsa:7314   | UBB        | unknown     | 24.033959 |
| hsa:26994 | RNF11        | IPI00003894 | hsa:7314   | UBB        | unknown     | 24.033959 |
| hsa:331   | BIRC4        | IPI00303890 | hsa:7314   | UBB        | unknown     | 24.033959 |
| hsa:7189  | TRAF6        | IPI00743663 | hsa:7314   | UBB        | unknown     | 24.033959 |
| hsa:22954 | TRIM32       | IPI00297113 | hsa:29979  | UBQLN1     | IPI00099550 | 24.033959 |
| hsa:6477  | SIAH1        | IPI00396517 | hsa:573    | BAG1       | IPI00300531 | 24.033959 |
| hsa:55658 | RNF126       | IPI00155562 | hsa:7917   | BAT3       | IPI00465128 | 24.033959 |
| hsa:22954 | TRIM32       | IPI00297113 | hsa:56893  | UBQLN4     | IPI00024502 | 24.033959 |
| hsa:26994 | RNF11        | IPI00003894 | hsa:56893  | UBQLN4     | IPI00024502 | 24.033959 |
| hsa:26994 | RNF11        | IPI00003894 | hsa:29978  | UBQLN2     | IPI00409659 | 24.033959 |
| hsa:26994 | RNF11        | IPI00003894 | hsa:6233   | RPS27A7316 | IPI00654754 | 24.033959 |
| hsa:26994 | RNF11        | IPI00003894 | hsa:7311   | UBA52      | IPI00385127 | 24.033959 |
| hsa:26994 | RNF11        | IPI00003894 | hsa:7316   | UBC        | unknown     | 24.033959 |
| hsa:54708 | 5-Mar        | IPI00414168 | hsa:7314   | UBB        | unknown     | 24.033959 |
| hsa:7186  | TRAF2        | IPI00030278 | hsa:7314   | UBB        | unknown     | 24.033959 |
| hsa:7189  | TRAF6        | IPI00743663 | hsa:6233   | RPS27A7316 | IPI00654754 | 24.033959 |
| hsa:6048  | RNF5         | IPI00012608 | hsa:7314   | UBB        | unknown     | 24.033959 |
| hsa:4188  | MDFI         | IPI00023726 | hsa:154865 | FLJ35834   | IPI00167908 | 24.033959 |
| hsa:22954 | TRIM32       | IPI00297113 | hsa:29979  | UBQLN1     | IPI00099550 | 24.033959 |
| hsa:7186  | TRAF2        | IPI00030278 | hsa:7755   | ZNF205     | IPI00029377 | 24.033959 |
| hsa:56658 | TRIM39       | IPI00873841 | hsa:80019  | UBTD1      | IPI00017227 | 24.033959 |
| hsa:7186  | TRAF2        | IPI00030278 | hsa:5886   | RAD23A     | IPI00008219 | 24.033959 |
| hsa:4485  | MST1         | IPI00292218 | hsa:3818   | KLKB1      | IPI00654888 | 24.012653 |
| hsa:3082  | HGF          | IPI00025767 | hsa:3818   | KLKB1      | IPI00654888 | 24.012653 |
| hsa:3082  | HGF          | IPI00025767 | hsa:2160   | F11        | IPI00008556 | 24.012653 |
| hsa:868   | CBLB         | IPI00292856 | hsa:7535   | ZAP70      | IPI00329789 | 23.874707 |
| hsa:868   | CBLB         | IPI00292856 | hsa:6850   | SYK        | IPI00018597 | 23.874707 |
| hsa:3932  | LCK          | IPI00394952 | hsa:1501   | CTNND2     | IPI00301317 | 23.706369 |
| hsa:2241  | FER          | IPI00029263 | hsa:1500   | CTNND1     | IPI00219725 | 23.706369 |
| hsa:6714  | SRC          | IPI00641230 | hsa:1500   | CTNND1     | IPI00219725 | 23.706369 |
| hsa:1956  | EGFR         | IPI00018274 | hsa:1500   | CTNND1     | IPI00219725 | 23.706369 |
| hsa:5747  | PTK2         | IPI00012885 | hsa:324    | APC        | IPI00012391 | 23.706369 |
| hsa:25    | ABL129892    | IPI00216969 | hsa:1501   | CTNND2     | IPI00301317 | 23.706369 |
| hsa:5566  | PRKACA730418 | IPI00396630 | hsa:324    | APC        | IPI00012391 | 23.706369 |
| hsa:2534  | FYN          | IPI00219012 | hsa:1501   | CTNND2     | IPI00301317 | 23.706369 |
| hsa:2932  | GSK3B        | IPI00028570 | hsa:324    | APC        | IPI00012391 | 23.706369 |
| hsa:4140  | MARK3        | IPI00183118 | hsa:113174 | SAAL1      | IPI00304935 | 23.706369 |
| hsa:4214  | MAP3K1       | IPI00855985 | hsa:23640  | HSPBP1     | IPI00100748 | 23.706369 |
| hsa:3611  | ILK          | IPI00013219 | hsa:93436  | ARMC6      | IPI00020196 | 23.706369 |
| hsa:27148 | STK36        | IPI00235407 | hsa:93436  | ARMC6      | IPI00020196 | 23.706369 |
| hsa:29959 | NRBP1        | IPI00604756 | hsa:55183  | RIF1       | IPI00375454 | 23.706369 |
| hsa:2932  | GSK3B        | IPI00028570 | hsa:1500   | CTNND1     | IPI00219725 | 23.706369 |
| hsa:50488 | MINK1        | IPI00166680 | hsa:8502   | PKP4       | IPI00021076 | 23.706369 |
| hsa:699   | BUB1         | IPI00783305 | hsa:324    | APC        | IPI00012391 | 23.706369 |
| hsa:1454  | CSNK1E       | IPI00027729 | hsa:324    | APC        | IPI00012391 | 23.706369 |
| hsa:4140  | MARK3        | IPI00183118 | hsa:5318   | PKP2       | IPI00005264 | 23.706369 |
| hsa:29959 | NRBP         | IPI00604756 | hsa:55183  | RIF1       | IPI00375454 | 23.706369 |
| hsa:9266  | PSCD2        | IPI00015228 | hsa:55738  | ARFGAP1    | IPI00175169 | 23.690617 |
| hsa:8737  | RIPK1        | IPI00013773 | hsa:7186   | TRAF2      | IPI00030278 | 23.645307 |
| hsa:51135 | IRAK4        | IPI00007641 | hsa:7189   | TRAF6      | IPI00743663 | 23.645307 |
| hsa:11213 | IRAK3        | IPI00026984 | hsa:7189   | TRAF6      | IPI00743663 | 23.645307 |
| hsa:3656  | IRAK2        | IPI00304986 | hsa:7189   | TRAF6      | IPI00743663 | 23.645307 |
| hsa:3654  | IRAK1        | IPI00293652 | hsa:7189   | TRAF6      | IPI00743663 | 23.645307 |
| hsa:868   | CBLB         | IPI00292856 | hsa:2534   | FYN        | IPI00219012 | 23.376009 |
| hsa:5338  | PLD2         | IPI00024727 | hsa:375    | ARF1       | IPI00215914 | 23.207135 |
| hsa:5337  | PLD1         | IPI00012865 | hsa:382    | ARF6       | IPI00215920 | 23.207135 |
| hsa:5337  | PLD1         | IPI00012865 | hsa:5898   | RALA       | IPI00217519 | 23.207135 |

|            |         |             |           |            |             |           |
|------------|---------|-------------|-----------|------------|-------------|-----------|
| hsa:5337   | PLD1    | IPI00012865 | hsa:391   | RHOG       | IPI00017342 | 23.207135 |
| hsa:5337   | PLD1    | IPI00012865 | hsa:387   | RHOA       | IPI00478231 | 23.207135 |
| hsa:5337   | PLD1    | IPI00012865 | hsa:998   | CDC42      | IPI00007189 | 23.207135 |
| hsa:5337   | PLD1    | IPI00012865 | hsa:375   | ARF1       | IPI00215914 | 23.207135 |
| hsa:84725  | PLEKHA8 | IPI00867525 | hsa:375   | ARF1       | IPI00215914 | 23.207135 |
| hsa:9267   | PSCD1   | IPI00478608 | hsa:10139 | ARFRP1     | IPI00015178 | 23.207135 |
| hsa:9267   | PSCD1   | IPI00478608 | hsa:373   | TRIM23     | IPI00003328 | 23.207135 |
| hsa:9266   | PSCD2   | IPI00015228 | hsa:373   | TRIM23     | IPI00003328 | 23.207135 |
| hsa:9266   | PSCD2   | IPI00015228 | hsa:382   | ARF6       | IPI00215920 | 23.207135 |
| hsa:55198  | APPL2   | IPI00172513 | hsa:57403 | RAB22A     | IPI00007756 | 23.207135 |
| hsa:5662   | PSD     | IPI00385148 | hsa:57799 | RAB40C     | IPI00045478 | 23.207135 |
| hsa:9046   | DOK2    | IPI00022602 | hsa:10890 | RAB10      | IPI00016513 | 23.207135 |
| hsa:5337   | PLD1    | IPI00012865 | hsa:5879  | RAC1       | IPI00010271 | 23.207135 |
| hsa:55198  | APPL2   | IPI00172513 | hsa:5868  | RAB5A      | IPI00023510 | 23.207135 |
| hsa:26060  | APPL1   | IPI00015836 | hsa:5868  | RAB5A      | IPI00023510 | 23.207135 |
| hsa:9266   | PSCD2   | IPI00015228 | hsa:375   | ARF1       | IPI00215914 | 23.207135 |
| hsa:9267   | PSCD1   | IPI00478608 | hsa:375   | ARF1       | IPI00215914 | 23.207135 |
| hsa:149371 | EXOC8   | IPI00028264 | hsa:5898  | RALA       | IPI00217519 | 23.207135 |
| hsa:23348  | DOCK9   | IPI00332567 | hsa:998   | CDC42      | IPI00007189 | 23.207135 |
| hsa:63916  | ELMO2   | IPI00260090 | hsa:391   | RHOG       | IPI00017342 | 23.207135 |
| hsa:23612  | PHLDA3  | IPI00329599 | hsa:400   | ARL1       | IPI00219518 | 23.207135 |
| hsa:55198  | DIP13B  | IPI00172513 | hsa:57403 | RAB22A     | IPI00007756 | 23.207135 |
| hsa:9542   | NRG2    | IPI00477848 | hsa:2065  | ERBB3      | IPI00298285 | 23.174097 |
| hsa:23345  | SYNE1   | IPI00386444 | hsa:823   | CAPN1      | IPI00011285 | 23.032545 |
| hsa:88     | ACTN2   | IPI00019884 | hsa:5311  | PKD2       | IPI00299040 | 23.032545 |
| hsa:88     | ACTN2   | IPI00019884 | hsa:823   | CAPN1      | IPI00011285 | 23.032545 |
| hsa:6709   | SPTAN1  | IPI00844215 | hsa:823   | CAPN1      | IPI00011285 | 23.032545 |
| hsa:6709   | SPTAN1  | IPI00844215 | hsa:825   | CAPN3      | IPI00025819 | 23.032545 |
| hsa:7402   | UTRN    | IPI00009329 | hsa:88    | ACTN2      | IPI00019884 | 23.032545 |
| hsa:4622   | MYH4    | IPI00001753 | hsa:6275  | S100A4     | IPI00032313 | 23.032545 |
| hsa:4620   | MYH2    | IPI00007856 | hsa:6275  | S100A4     | IPI00032313 | 23.032545 |
| hsa:58480  | RHOU    | IPI00009644 | hsa:5058  | PAK1       | IPI00656138 | 22.752059 |
| hsa:4735   | 2-Sep   | IPI00014177 | hsa:5062  | PAK2       | IPI00787208 | 22.752059 |
| hsa:3265   | HRAS    | IPI00000006 | hsa:369   | ARAF       | IPI00872240 | 22.582651 |
| hsa:5906   | RAP1A   | IPI00019345 | hsa:673   | BRAF       | IPI00303797 | 22.582651 |
| hsa:3265   | HRAS    | IPI00000006 | hsa:673   | BRAF       | IPI00303797 | 22.582651 |
| hsa:3845   | KRAS    | IPI00423568 | hsa:5894  | RAF1       | IPI00021786 | 22.582651 |
| hsa:22800  | RRAS2   | IPI00012512 | hsa:5894  | RAF1       | IPI00021786 | 22.582651 |
| hsa:3265   | HRAS    | IPI00000006 | hsa:5894  | RAF1       | IPI00021786 | 22.582651 |
| hsa:5911   | RAP2A   | IPI00019346 | hsa:5894  | RAF1       | IPI00021786 | 22.582651 |
| hsa:5906   | RAP1A   | IPI00019345 | hsa:5894  | RAF1       | IPI00021786 | 22.582651 |
| hsa:4893   | NRAS    | IPI00000005 | hsa:5894  | RAF1       | IPI00021786 | 22.582651 |
| hsa:22800  | RRAS2   | IPI00012512 | hsa:369   | ARAF       | IPI00872240 | 22.582651 |
| hsa:6237   | RRAS    | IPI00020418 | hsa:369   | ARAF       | IPI00872240 | 22.582651 |
| hsa:23624  | CBLC    | IPI00008459 | hsa:6714  | SRC        | IPI00641230 | 22.524036 |
| hsa:23624  | CBLC    | IPI00008459 | hsa:4067  | LYN        | IPI00298625 | 22.524036 |
| hsa:9693   | RAPGEF2 | IPI00853219 | hsa:5912  | RAP2B      | IPI00018364 | 22.198203 |
| hsa:51735  | RAPGEF6 | IPI00337694 | hsa:5906  | RAP1A      | IPI00019345 | 22.198203 |
| hsa:9693   | RAPGEF2 | IPI00853219 | hsa:5906  | RAP1A      | IPI00019345 | 22.198203 |
| hsa:51735  | RAPGEF6 | IPI00337694 | hsa:22808 | MRAS       | IPI00024166 | 22.198203 |
| hsa:51735  | RAPGEF6 | IPI00337694 | hsa:5911  | RAP2A      | IPI00019346 | 22.198203 |
| hsa:51196  | PLCE1   | IPI00791109 | hsa:3265  | HRAS       | IPI00000006 | 22.186451 |
| hsa:51196  | PLCE1   | IPI00791109 | hsa:4893  | NRAS       | IPI00000005 | 22.186451 |
| hsa:51196  | PLCE1   | IPI00791109 | hsa:4893  | NRAS       | IPI00000005 | 22.186451 |
| hsa:3576   | IL8     | IPI00288914 | hsa:3577  | IL8RA      | IPI00296618 | 22.100193 |
| hsa:3576   | IL8     | IPI00288914 | hsa:2532  | DARC       | IPI00002940 | 22.100193 |
| hsa:2919   | CXCL1   | IPI00013874 | hsa:3577  | IL8RA      | IPI00296618 | 22.100193 |
| hsa:6347   | CCL2    | IPI00009308 | hsa:1238  | CCBP2      | IPI00012180 | 22.100193 |
| hsa:6347   | CCL2    | IPI00009308 | hsa:51554 | CCRL1      | IPI00014785 | 22.100193 |
| hsa:6347   | CCL2    | IPI00009308 | hsa:1231  | CCR2729230 | IPI00015137 | 22.100193 |

|            |            |             |           |            |             |           |
|------------|------------|-------------|-----------|------------|-------------|-----------|
| hsa:6347   | CCL2       | IPI00009308 | hsa:1230  | CCR1       | IPI00027685 | 22.100193 |
| hsa:6347   | CCL2       | IPI00009308 | hsa:2826  | CCR10      | IPI00004346 | 22.100193 |
| hsa:6352   | CCL5       | IPI00009309 | hsa:1238  | CCBP2      | IPI00012180 | 22.100193 |
| hsa:6352   | CCL5       | IPI00009309 | hsa:51554 | CCRL1      | IPI00014785 | 22.100193 |
| hsa:6352   | CCL5       | IPI00009309 | hsa:1232  | CCR3       | IPI00019957 | 22.100193 |
| hsa:6352   | CCL5       | IPI00009309 | hsa:1230  | CCR1       | IPI00027685 | 22.100193 |
| hsa:5473   | PPBP       | IPI00022445 | hsa:3577  | IL8RA      | IPI00296618 | 22.100193 |
| hsa:6366   | CCL21      | IPI00012174 | hsa:51554 | CCRL1      | IPI00014785 | 22.100193 |
| hsa:6366   | CCL21      | IPI00012174 | hsa:1238  | CCBP2      | IPI00012180 | 22.100193 |
| hsa:6366   | CCL21      | IPI00012174 | hsa:1236  | CCR7       | IPI00027687 | 22.100193 |
| hsa:3627   | CXCL10     | IPI00022448 | hsa:1232  | CCR3       | IPI00019957 | 22.100193 |
| hsa:3627   | CXCL10     | IPI00022448 | hsa:2833  | CXCR3      | IPI00027754 | 22.100193 |
| hsa:6375   | XCL1       | IPI00026979 | hsa:2829  | XCR1       | IPI00004349 | 22.100193 |
| hsa:6364   | CCL20      | IPI00020355 | hsa:1235  | CCR6       | IPI00293730 | 22.100193 |
| hsa:6355   | CCL8       | IPI00007524 | hsa:1238  | CCBP2      | IPI00012180 | 22.100193 |
| hsa:6355   | CCL8       | IPI00007524 | hsa:51554 | CCRL1      | IPI00014785 | 22.100193 |
| hsa:6355   | CCL8       | IPI00007524 | hsa:1232  | CCR3       | IPI00019957 | 22.100193 |
| hsa:6355   | CCL8       | IPI00007524 | hsa:1231  | CCR2729230 | IPI00015137 | 22.100193 |
| hsa:6355   | CCL8       | IPI00007524 | hsa:1230  | CCR1       | IPI00027685 | 22.100193 |
| hsa:6354   | CCL7       | IPI00746376 | hsa:1238  | CCBP2      | IPI00012180 | 22.100193 |
| hsa:6354   | CCL7       | IPI00746376 | hsa:51554 | CCRL1      | IPI00014785 | 22.100193 |
| hsa:6354   | CCL7       | IPI00746376 | hsa:1232  | CCR3       | IPI00019957 | 22.100193 |
| hsa:6354   | CCL7       | IPI00746376 | hsa:1231  | CCR2729230 | IPI00015137 | 22.100193 |
| hsa:6354   | CCL7       | IPI00746376 | hsa:1230  | CCR1       | IPI00027685 | 22.100193 |
| hsa:6354   | CCL7       | IPI00746376 | hsa:2826  | CCR10      | IPI00004346 | 22.100193 |
| hsa:6357   | CCL13      | IPI00016914 | hsa:1232  | CCR3       | IPI00019957 | 22.100193 |
| hsa:6357   | CCL13      | IPI00016914 | hsa:1231  | CCR2729230 | IPI00015137 | 22.100193 |
| hsa:6357   | CCL13      | IPI00016914 | hsa:1238  | CCBP2      | IPI00012180 | 22.100193 |
| hsa:6357   | CCL13      | IPI00016914 | hsa:51554 | CCRL1      | IPI00014785 | 22.100193 |
| hsa:6374   | CXCL5      | IPI00292936 | hsa:3577  | IL8RA      | IPI00296618 | 22.100193 |
| hsa:6372   | CXCL6      | IPI00008079 | hsa:3577  | IL8RA      | IPI00296618 | 22.100193 |
| hsa:2920   | CXCL2      | IPI00021067 | hsa:3577  | IL8RA      | IPI00296618 | 22.100193 |
| hsa:2921   | CXCL3      | IPI00218180 | hsa:3577  | IL8RA      | IPI00296618 | 22.100193 |
| hsa:5196   | PF4        | IPI00022446 | hsa:2833  | CXCR3      | IPI00027754 | 22.100193 |
| hsa:10563  | CXCL13     | IPI00015163 | hsa:51554 | CCRL1      | IPI00014785 | 22.100193 |
| hsa:10563  | CXCL13     | IPI00015163 | hsa:643   | BLR1       | IPI00027955 | 22.100193 |
| hsa:10563  | CXCL13     | IPI00015163 | hsa:2833  | CXCR3      | IPI00027754 | 22.100193 |
| hsa:6351   | CCL4       | IPI00007751 | hsa:1238  | CCBP2      | IPI00012180 | 22.100193 |
| hsa:6351   | CCL4       | IPI00007751 | hsa:1237  | CCR8       | IPI00019985 | 22.100193 |
| hsa:6351   | CCL4       | IPI00007751 | hsa:1230  | CCR1       | IPI00027685 | 22.100193 |
| hsa:6361   | CCL17      | IPI00022062 | hsa:1237  | CCR8       | IPI00019985 | 22.100193 |
| hsa:6376   | CX3CL1     | IPI00019771 | hsa:1524  | CX3CR1     | IPI00026498 | 22.100193 |
| hsa:6360   | CCL16      | IPI00006717 | hsa:1237  | CCR8       | IPI00019985 | 22.100193 |
| hsa:6370   | CCL25      | IPI00292032 | hsa:10803 | CCR9       | IPI00009902 | 22.100193 |
| hsa:6366   | CCL21      | IPI00012174 | hsa:2826  | CCR10      | IPI00004346 | 22.100193 |
| hsa:6356   | CCL11      | IPI00019945 | hsa:1234  | CCR5       | IPI00807387 | 22.100193 |
| hsa:6351   | CCL4       | IPI00007751 | hsa:1234  | CCR5       | IPI00807387 | 22.100193 |
| hsa:6348   | CCL3       | IPI00019426 | hsa:1234  | CCR5       | IPI00807387 | 22.100193 |
| hsa:414062 | CCL3L36349 | IPI00871477 | hsa:1234  | CCR5       | IPI00807387 | 22.100193 |
| hsa:6355   | CCL8       | IPI00007524 | hsa:1234  | CCR5       | IPI00807387 | 22.100193 |
| hsa:6349   | CCL3L1     | unknown     | hsa:1234  | CCR5       | IPI00807387 | 22.100193 |
| hsa:6360   | CCL16      | IPI00006717 | hsa:1234  | CCR5       | IPI00807387 | 22.100193 |
| hsa:6358   | CCL14      | IPI00003375 | hsa:1234  | CCR5       | IPI00807387 | 22.100193 |
| hsa:6357   | CCL13      | IPI00016914 | hsa:1234  | CCR5       | IPI00807387 | 22.100193 |
| hsa:6352   | CCL5       | IPI00009309 | hsa:1234  | CCR5       | IPI00807387 | 22.100193 |
| hsa:6354   | CCL7       | IPI00746376 | hsa:1234  | CCR5       | IPI00807387 | 22.100193 |
| hsa:6347   | CCL2       | IPI00009308 | hsa:1234  | CCR5       | IPI00807387 | 22.100193 |
| hsa:6374   | CXCL5      | IPI00292936 | hsa:3579  | IL8RB      | IPI00012320 | 22.100193 |
| hsa:5473   | PPBP       | IPI00022445 | hsa:3579  | IL8RB      | IPI00012320 | 22.100193 |
| hsa:2919   | CXCL1      | IPI00013874 | hsa:3579  | IL8RB      | IPI00012320 | 22.100193 |

|            |            |             |           |            |             |           |
|------------|------------|-------------|-----------|------------|-------------|-----------|
| hsa:3576   | IL8        | IPI00288914 | hsa:3579  | IL8RB      | IPI00012320 | 22.100193 |
| hsa:2921   | CXCL3      | IPI00218180 | hsa:3579  | IL8RB      | IPI00012320 | 22.100193 |
| hsa:2920   | CXCL2      | IPI00021067 | hsa:3579  | IL8RB      | IPI00012320 | 22.100193 |
| hsa:6372   | CXCL6      | IPI00008079 | hsa:3579  | IL8RB      | IPI00012320 | 22.100193 |
| hsa:6367   | CCL22      | IPI00299224 | hsa:1233  | CCR4       | IPI00019958 | 22.100193 |
| hsa:6361   | CCL17      | IPI00022062 | hsa:1233  | CCR4       | IPI00019958 | 22.100193 |
| hsa:6348   | CCL3       | IPI00019426 | hsa:1233  | CCR4       | IPI00019958 | 22.100193 |
| hsa:6352   | CCL5       | IPI00009309 | hsa:1233  | CCR4       | IPI00019958 | 22.100193 |
| hsa:6387   | CXCL12     | IPI00848299 | hsa:7852  | CXCR4      | IPI00028159 | 22.100193 |
| hsa:6354   | CCL7       | IPI00746376 | hsa:2532  | DARC       | IPI00002940 | 22.100193 |
| hsa:6361   | CCL17      | IPI00022062 | hsa:2532  | DARC       | IPI00002940 | 22.100193 |
| hsa:6355   | CCL8       | IPI00007524 | hsa:2532  | DARC       | IPI00002940 | 22.100193 |
| hsa:6374   | CXCL5      | IPI00292936 | hsa:2532  | DARC       | IPI00002940 | 22.100193 |
| hsa:6352   | CCL5       | IPI00009309 | hsa:2532  | DARC       | IPI00002940 | 22.100193 |
| hsa:6347   | CCL2       | IPI00009308 | hsa:2532  | DARC       | IPI00002940 | 22.100193 |
| hsa:2919   | CXCL1      | IPI00013874 | hsa:2532  | DARC       | IPI00002940 | 22.100193 |
| hsa:56477  | CCL28      | IPI00016593 | hsa:2826  | CCR10      | IPI00004346 | 22.100193 |
| hsa:10563  | CXCL13     | IPI00015163 | hsa:2826  | CCR10      | IPI00004346 | 22.100193 |
| hsa:6370   | CCL25      | IPI00292032 | hsa:2826  | CCR10      | IPI00004346 | 22.100193 |
| hsa:6363   | CCL19      | IPI00017761 | hsa:2826  | CCR10      | IPI00004346 | 22.100193 |
| hsa:6351   | CCL4       | IPI00007751 | hsa:1232  | CCR3       | IPI00019957 | 22.100193 |
| hsa:6369   | CCL24      | IPI00010462 | hsa:1232  | CCR3       | IPI00019957 | 22.100193 |
| hsa:4283   | CXCL9      | IPI00016534 | hsa:1232  | CCR3       | IPI00019957 | 22.100193 |
| hsa:6349   | CCL3L1     | unknown     | hsa:1232  | CCR3       | IPI00019957 | 22.100193 |
| hsa:6359   | CCL15      | IPI00003440 | hsa:1232  | CCR3       | IPI00019957 | 22.100193 |
| hsa:6358   | CCL14      | IPI00003375 | hsa:1232  | CCR3       | IPI00019957 | 22.100193 |
| hsa:6356   | CCL11      | IPI00019945 | hsa:1232  | CCR3       | IPI00019957 | 22.100193 |
| hsa:56477  | CCL28      | IPI00016593 | hsa:1232  | CCR3       | IPI00019957 | 22.100193 |
| hsa:6373   | CXCL11     | IPI00023056 | hsa:1232  | CCR3       | IPI00019957 | 22.100193 |
| hsa:10344  | CCL26      | IPI00031757 | hsa:1232  | CCR3       | IPI00019957 | 22.100193 |
| hsa:6348   | CCL3       | IPI00019426 | hsa:1232  | CCR3       | IPI00019957 | 22.100193 |
| hsa:6360   | CCL16      | IPI00006717 | hsa:59340 | HRH4       | IPI00023596 | 22.100193 |
| hsa:6360   | CCL16      | IPI00006717 | hsa:1231  | CCR2729230 | IPI00015137 | 22.100193 |
| hsa:6356   | CCL11      | IPI00019945 | hsa:1231  | CCR2729230 | IPI00015137 | 22.100193 |
| hsa:6373   | CXCL11     | IPI00023056 | hsa:2833  | CXCR3      | IPI00027754 | 22.100193 |
| hsa:4283   | CXCL9      | IPI00016534 | hsa:2833  | CXCR3      | IPI00027754 | 22.100193 |
| hsa:10344  | CCL26      | IPI00031757 | hsa:1230  | CCR1       | IPI00027685 | 22.100193 |
| hsa:6368   | CCL23      | IPI00026179 | hsa:1230  | CCR1       | IPI00027685 | 22.100193 |
| hsa:6349   | CCL3L1     | unknown     | hsa:1230  | CCR1       | IPI00027685 | 22.100193 |
| hsa:6360   | CCL16      | IPI00006717 | hsa:1230  | CCR1       | IPI00027685 | 22.100193 |
| hsa:6359   | CCL15      | IPI00003440 | hsa:1230  | CCR1       | IPI00027685 | 22.100193 |
| hsa:6358   | CCL14      | IPI00003375 | hsa:1230  | CCR1       | IPI00027685 | 22.100193 |
| hsa:6348   | CCL3       | IPI00019426 | hsa:1230  | CCR1       | IPI00027685 | 22.100193 |
| hsa:6370   | CCL25      | IPI00292032 | hsa:51554 | CCRL1      | IPI00014785 | 22.100193 |
| hsa:6363   | CCL19      | IPI00017761 | hsa:51554 | CCRL1      | IPI00014785 | 22.100193 |
| hsa:6356   | CCL11      | IPI00019945 | hsa:51554 | CCRL1      | IPI00014785 | 22.100193 |
| hsa:56477  | CCL28      | IPI00016593 | hsa:1238  | CCBP2      | IPI00012180 | 22.100193 |
| hsa:414062 | CCL3L36349 | IPI00871477 | hsa:1238  | CCBP2      | IPI00012180 | 22.100193 |
| hsa:6363   | CCL19      | IPI00017761 | hsa:1238  | CCBP2      | IPI00012180 | 22.100193 |
| hsa:6370   | CCL25      | IPI00292032 | hsa:1238  | CCBP2      | IPI00012180 | 22.100193 |
| hsa:6358   | CCL14      | IPI00003375 | hsa:1238  | CCBP2      | IPI00012180 | 22.100193 |
| hsa:6356   | CCL11      | IPI00019945 | hsa:1238  | CCBP2      | IPI00012180 | 22.100193 |
| hsa:6348   | CCL3       | IPI00019426 | hsa:1238  | CCBP2      | IPI00012180 | 22.100193 |
| hsa:6846   | XCL2       | IPI00002528 | hsa:2829  | XCR1       | IPI00004349 | 22.100193 |
| hsa:6346   | CCL1       | IPI00026221 | hsa:1237  | CCR8       | IPI00019985 | 22.100193 |
| hsa:6363   | CCL19      | IPI00017761 | hsa:1236  | CCR7       | IPI00027687 | 22.100193 |
| hsa:868    | CBLB       | IPI00292856 | hsa:2533  | FYB        | IPI00446986 | 21.630563 |
| hsa:868    | CBLB       | IPI00292856 | hsa:30011 | SH3KBP1    | IPI00294962 | 21.630563 |
| hsa:868    | CBLB       | IPI00292856 | hsa:10174 | SORBS3     | IPI00419847 | 21.630563 |
| hsa:3569   | IL6        | IPI00007793 | hsa:3570  | IL6R       | IPI00031171 | 21.536925 |

|            |            |             |            |         |             |           |
|------------|------------|-------------|------------|---------|-------------|-----------|
| hsa:3569   | IL6        | IPI00007793 | hsa:3572   | IL6ST   | IPI00297124 | 21.536925 |
| hsa:2688   | GH1        | unknown     | hsa:2690   | GHR     | IPI00023599 | 21.536925 |
| hsa:2689   | GH2        | IPI00000890 | hsa:2690   | GHR     | IPI00023599 | 21.536925 |
| hsa:51561  | IL23A      | IPI00300835 | hsa:149233 | IL23R   | IPI00303045 | 21.536925 |
| hsa:1440   | CSF3       | IPI00018306 | hsa:1441   | CSF3R   | IPI00012936 | 21.536925 |
| hsa:1442   | CSH1       | unknown     | hsa:5618   | PRLR    | IPI00028640 | 21.536925 |
| hsa:5617   | PRL        | IPI00873653 | hsa:5618   | PRLR    | IPI00028640 | 21.536925 |
| hsa:2688   | GH1        | unknown     | hsa:5618   | PRLR    | IPI00028640 | 21.536925 |
| hsa:3589   | IL11       | IPI00025820 | hsa:3590   | IL11RA  | IPI00184319 | 21.536925 |
| hsa:51561  | IL23A      | IPI00300835 | hsa:3594   | IL12RB1 | IPI00001400 | 21.536925 |
| hsa:50619  | DEF6       | IPI00004924 | hsa:387    | RHOA    | IPI00478231 | 20.467404 |
| hsa:5333   | PLCD1      | IPI00746030 | hsa:5899   | RALB    | IPI00004397 | 20.467404 |
| hsa:50619  | DEF6       | IPI00004924 | hsa:5879   | RAC1    | IPI00010271 | 20.467404 |
| hsa:50619  | DEF6       | IPI00004924 | hsa:5880   | RAC2    | IPI00010270 | 20.467404 |
| hsa:5333   | PLCD1      | IPI00746030 | hsa:5898   | RALA    | IPI00217519 | 20.467404 |
| hsa:50619  | DEF6       | IPI00004924 | hsa:998    | CDC42   | IPI00007189 | 20.467404 |
| hsa:4649   | MYO9A      | IPI00018057 | hsa:998    | CDC42   | IPI00007189 | 20.306244 |
| hsa:8315   | BRAP       | IPI00396089 | hsa:3265   | HRAS    | IPI00000006 | 20.306243 |
| hsa:197131 | UBR1       | IPI00217405 | hsa:54622  | ARL15   | IPI00005163 | 20.306243 |
| hsa:197131 | UBR1       | IPI00217405 | hsa:379    | ARL4D   | IPI00027971 | 20.306243 |
| hsa:197131 | UBR1       | IPI00217405 | hsa:403    | ARL3    | IPI00003327 | 20.306243 |
| hsa:79083  | MLPH       | IPI00012201 | hsa:5874   | RAB27B  | IPI00010491 | 20.306243 |
| hsa:9372   | ZFYVE9     | IPI00030648 | hsa:89941  | RHOT2   | IPI00465059 | 20.306243 |
| hsa:9146   | HGS        | IPI00006176 | hsa:51552  | RAB14   | IPI00291928 | 20.306243 |
| hsa:64145  | ZFYVE20    | IPI00007057 | hsa:5868   | RAB5A   | IPI00023510 | 20.306243 |
| hsa:64145  | ZFYVE20    | IPI00007057 | hsa:5867   | RAB4A   | IPI00480056 | 20.306243 |
| hsa:80230  | RUFY1      | IPI00744637 | hsa:5867   | RAB4A   | IPI00480056 | 20.306243 |
| hsa:197131 | UBR1       | IPI00217405 | hsa:998    | CDC42   | IPI00007189 | 20.306243 |
| hsa:79083  | MLPH       | IPI00012201 | hsa:5873   | RAB27A  | IPI00016381 | 20.306243 |
| hsa:197131 | UBR1       | IPI00217405 | hsa:379    | ARF4L   | IPI00027971 | 20.306243 |
| hsa:197131 | UBR1       | IPI00217405 | hsa:403    | ARL3    | IPI00003327 | 20.306243 |
| hsa:197131 | UBR1       | IPI00217405 | hsa:54622  | ARFRP2  | IPI00005163 | 20.306243 |
| hsa:197131 | UBR1       | IPI00217405 | hsa:998    | CDC42   | IPI00007189 | 20.306243 |
| hsa:5335   | PLCG1      | IPI00016736 | hsa:58480  | RHOA    | IPI00009644 | 20.265953 |
| hsa:5335   | PLCG1      | IPI00016736 | hsa:387    | RHOA    | IPI00478231 | 20.265953 |
| hsa:8853   | DDEF2      | IPI00022058 | hsa:5901   | RAN     | IPI00643041 | 20.265953 |
| hsa:8853   | DDEF2      | IPI00022058 | hsa:382    | ARF6    | IPI00215920 | 20.265953 |
| hsa:8853   | DDEF2      | IPI00022058 | hsa:381    | ARF5    | IPI00215919 | 20.265953 |
| hsa:8853   | DDEF2      | IPI00022058 | hsa:375    | ARF1    | IPI00215914 | 20.265953 |
| hsa:1950   | EGF        | IPI00000073 | hsa:2064   | ERBB2   | IPI00300384 | 20.106633 |
| hsa:1839   | HBEGF      | IPI00012948 | hsa:2066   | ERBB4   | IPI00016371 | 20.106633 |
| hsa:1839   | HBEGF      | IPI00012948 | hsa:1956   | EGFR    | IPI00018274 | 20.106633 |
| hsa:7039   | TGFA       | IPI00872280 | hsa:1956   | EGFR    | IPI00018274 | 20.106633 |
| hsa:1950   | EGF        | IPI00000073 | hsa:1956   | EGFR    | IPI00018274 | 20.106633 |
| hsa:2069   | EREG       | IPI00024741 | hsa:1956   | EGFR    | IPI00018274 | 20.106633 |
| hsa:685    | BTC        | IPI00015755 | hsa:1956   | EGFR    | IPI00018274 | 20.106633 |
| hsa:374    | AREG727738 | IPI00012023 | hsa:1956   | EGFR    | IPI00018274 | 20.106633 |
| hsa:7039   | TGFA       | IPI00872280 | hsa:2064   | ERBB2   | IPI00300384 | 20.106633 |
| hsa:4585   | MUC4       | IPI00302162 | hsa:2064   | ERBB2   | IPI00300384 | 20.106633 |
| hsa:685    | BTC        | IPI00015755 | hsa:2064   | ERBB2   | IPI00300384 | 20.106633 |
| hsa:685    | BTC        | IPI00015755 | hsa:2066   | ERBB4   | IPI00016371 | 20.106633 |
| hsa:7039   | TGFA       | IPI00872280 | hsa:2066   | ERBB4   | IPI00016371 | 20.106633 |
| hsa:10718  | NRG3       | IPI00012044 | hsa:2066   | ERBB4   | IPI00016371 | 20.106633 |
| hsa:145957 | NRG4       | IPI00103330 | hsa:2066   | ERBB4   | IPI00016371 | 20.106633 |
| hsa:2069   | EREG       | IPI00024741 | hsa:2066   | ERBB4   | IPI00016371 | 20.106633 |
| hsa:7168   | TPM1       | IPI00014581 | hsa:5311   | PKD2    | IPI00299040 | 19.742181 |
| hsa:7168   | TPM1       | IPI00014581 | hsa:6273   | S100A2  | IPI00019869 | 19.742181 |
| hsa:7169   | TPM2       | IPI00013991 | hsa:6273   | S100A2  | IPI00019869 | 19.742181 |
| hsa:3848   | KRT1       | IPI00220327 | hsa:794    | CALB2   | IPI00027264 | 19.742181 |
| hsa:56658  | TRIM39     | IPI00873841 | hsa:84812  | PLCD4   | IPI00013745 | 19.742181 |



|            |           |             |            |           |             |           |
|------------|-----------|-------------|------------|-----------|-------------|-----------|
| hsa:84440  | RAB11FIP4 | IPI00174771 | hsa:9727   | RAB11FIP3 | IPI00024426 | 19.742181 |
| hsa:7169   | TPM2      | IPI00013991 | hsa:6275   | S100A4    | IPI00032313 | 19.742181 |
| hsa:9472   | AKAP6     | IPI00297089 | hsa:6262   | RYR2      | IPI00023217 | 19.742181 |
| hsa:56658  | TRIM39    | IPI00873841 | hsa:84812  | PLCD4     | IPI00013745 | 19.742181 |
| hsa:57584  | ARHGAP21  | IPI00867539 | hsa:387    | RHOA      | IPI00478231 | 19.722036 |
| hsa:57584  | ARHGAP21  | IPI00867539 | hsa:375    | ARF1      | IPI00215914 | 19.722036 |
| hsa:4851   | NOTCH1    | IPI00412982 | hsa:331    | BIRC4     | IPI00303890 | 19.664149 |
| hsa:4851   | NOTCH1    | IPI00412982 | hsa:867    | CBL       | IPI00027269 | 19.664149 |
| hsa:4851   | NOTCH1    | IPI00412982 | hsa:113878 | DTX2      | IPI00292746 | 19.664149 |
| hsa:4851   | NOTCH1    | IPI00412982 | hsa:1840   | DTX1      | IPI00004554 | 19.664149 |
| hsa:602    | BCL3      | IPI00791379 | hsa:580    | BARD1     | IPI00017746 | 19.664149 |
| hsa:9627   | SNCAIP    | IPI00002293 | hsa:25897  | RNF19A    | IPI00019056 | 19.664149 |
| hsa:51676  | ASB2      | IPI00216028 | hsa:9616   | RNF7      | IPI00033132 | 19.664149 |
| hsa:28964  | GIT1      | IPI00384861 | hsa:1107   | CHD3      | IPI00373870 | 19.664149 |
| hsa:26287  | ANKRD2    | IPI00418217 | hsa:5371   | PML       | IPI00022348 | 19.664149 |
| hsa:4790   | NFKB1     | IPI00788987 | hsa:672    | BRCA1     | IPI00218982 | 19.664149 |
| hsa:580    | BARD1     | IPI00017746 | hsa:672    | BRCA1     | IPI00218982 | 19.664149 |
| hsa:5716   | PSMD10    | IPI00003565 | hsa:4193   | MDM2      | IPI00025490 | 19.664149 |
| hsa:1029   | CDKN2A    | IPI00651662 | hsa:4193   | MDM2      | IPI00025490 | 19.664149 |
| hsa:4793   | NFKB1B    | IPI00161119 | hsa:4804   | NGFR      | IPI00027436 | 19.664149 |
| hsa:57498  | KIDINS220 | IPI00384909 | hsa:4804   | NGFR      | IPI00027436 | 19.664149 |
| hsa:28964  | GIT1      | IPI00384861 | hsa:580    | BARD1     | IPI00017746 | 19.664149 |
| hsa:4853   | NOTCH2    | IPI00297655 | hsa:1840   | DTX1      | IPI00004554 | 19.664149 |
| hsa:9627   | SNCAIP    | IPI00002293 | hsa:6477   | SIAH1     | IPI00396517 | 19.664149 |
| hsa:9551   | ATP5J2    | IPI00220300 | hsa:7542   | ZFPL1     | IPI00296374 | 19.664149 |
| hsa:140460 | ASB7      | IPI00385151 | hsa:9616   | RNF7      | IPI00033132 | 19.664149 |
| hsa:142689 | ASB12     | IPI00514754 | hsa:9616   | RNF7      | IPI00033132 | 19.664149 |
| hsa:51665  | ASB1      | IPI00294946 | hsa:9616   | RNF7      | IPI00033132 | 19.664149 |
| hsa:140459 | ASB6      | IPI00016560 | hsa:9616   | RNF7      | IPI00033132 | 19.664149 |
| hsa:580    | BARD1     | IPI00017746 | hsa:1107   | CHD3      | IPI00373870 | 19.664149 |
| hsa:88455  | ANKRD13A  | IPI00217831 | hsa:26994  | RNF11     | IPI00003894 | 19.664149 |
| hsa:136319 | MTPN      | IPI00179589 | hsa:7189   | TRAF6     | IPI00743663 | 19.664149 |
| hsa:55503  | TRPV6     | IPI00152950 | hsa:4188   | MDFI      | IPI00023726 | 19.664149 |
| hsa:22821  | RASA3     | IPI00032267 | hsa:5906   | RAP1A     | IPI00019345 | 19.61919  |
| hsa:3083   | HGFAC     | IPI00029193 | hsa:3082   | HGF       | IPI00025767 | 19.561284 |
| hsa:7704   | ZBTB16    | IPI00305613 | hsa:7186   | TRAF2     | IPI00030278 | 19.527592 |
| hsa:7704   | ZBTB16    | IPI00305613 | hsa:7186   | TRAF2     | IPI00030278 | 19.527592 |
| hsa:84527  | ZNF559    | IPI00022177 | hsa:4188   | MDFI      | IPI00023726 | 19.527592 |
| hsa:7186   | TRAF2     | IPI00030278 | hsa:4214   | MAP3K1    | IPI00855985 | 19.279103 |
| hsa:1129   | CHRM2     | IPI00027473 | hsa:54331  | GNG2      | IPI00470619 | 19.061416 |
| hsa:6010   | RHO       | IPI00027391 | hsa:2792   | GNGT1     | IPI00221386 | 19.061416 |
| hsa:5921   | RASA1     | IPI00026262 | hsa:3265   | HRAS      | IPI00000006 | 18.854384 |
| hsa:5921   | RASA1     | IPI00026262 | hsa:5906   | RAP1A     | IPI00019345 | 18.854384 |
| hsa:5921   | RASA1     | IPI00026262 | hsa:5868   | RAB5A     | IPI00023510 | 18.854384 |
| hsa:4803   | NGFB      | IPI00000076 | hsa:4914   | NTRK1     | IPI00025076 | 18.612157 |
| hsa:627    | BDNF      | IPI00012058 | hsa:4915   | NTRK2     | IPI00003366 | 18.612157 |
| hsa:4908   | NTF3      | IPI00025474 | hsa:4915   | NTRK2     | IPI00003366 | 18.612157 |
| hsa:4908   | NTF3      | IPI00025474 | hsa:4916   | NTRK3     | IPI00000824 | 18.612157 |
| hsa:4909   | NTF5      | IPI00030097 | hsa:4915   | NTRK2     | IPI00003366 | 18.612157 |
| hsa:627    | BDNF      | IPI00012058 | hsa:4684   | NCAM1     | IPI00435020 | 18.612157 |
| hsa:7046   | TGFBR1    | IPI00005733 | hsa:163    | AP2B1     | IPI00784156 | 18.468916 |
| hsa:7046   | TGFBR1    | IPI00005733 | hsa:1499   | CTNNB1    | IPI00017292 | 18.468916 |
| hsa:7048   | TGFBR2    | IPI00020431 | hsa:163    | AP2B1     | IPI00784156 | 18.468916 |
| hsa:7048   | TGFBR2    | IPI00020431 | hsa:1499   | CTNNB1    | IPI00017292 | 18.468916 |
| hsa:4233   | MET       | IPI00029273 | hsa:1499   | CTNNB1    | IPI00017292 | 18.468916 |
| hsa:2241   | FER       | IPI00029263 | hsa:3728   | JUP       | IPI00554711 | 18.468916 |
| hsa:2241   | FER       | IPI00029263 | hsa:1499   | CTNNB1    | IPI00017292 | 18.468916 |
| hsa:6714   | SRC       | IPI00641230 | hsa:3728   | JUP       | IPI00554711 | 18.468916 |
| hsa:6714   | SRC       | IPI00641230 | hsa:1499   | CTNNB1    | IPI00017292 | 18.468916 |
| hsa:1956   | EGFR      | IPI00018274 | hsa:3064   | HD        | IPI00002335 | 18.468916 |

|            |           |             |            |        |             |           |
|------------|-----------|-------------|------------|--------|-------------|-----------|
| hsa:1956   | EGFR      | IPI00018274 | hsa:1499   | CTNNB1 | IPI00017292 | 18.468916 |
| hsa:90     | ACVR1     | IPI00029219 | hsa:163    | AP2B1  | IPI00784156 | 18.468916 |
| hsa:1452   | CSNK1A1   | IPI00183400 | hsa:3837   | KPNB1  | IPI00001639 | 18.468916 |
| hsa:1452   | CSNK1A1   | IPI00183400 | hsa:3838   | KPNA2  | IPI00002214 | 18.468916 |
| hsa:1452   | CSNK1A1   | IPI00183400 | hsa:1499   | CTNNB1 | IPI00017292 | 18.468916 |
| hsa:2534   | FYN       | IPI00219012 | hsa:3728   | JUP    | IPI00554711 | 18.468916 |
| hsa:2534   | FYN       | IPI00219012 | hsa:1499   | CTNNB1 | IPI00017292 | 18.468916 |
| hsa:2064   | ERBB2     | IPI00300384 | hsa:3728   | JUP    | IPI00554711 | 18.468916 |
| hsa:699    | BUB1      | IPI00783305 | hsa:163    | AP2B1  | IPI00784156 | 18.468916 |
| hsa:699    | BUB1      | IPI00783305 | hsa:162    | AP1B1  | IPI00328257 | 18.468916 |
| hsa:1021   | CDK6      | IPI00023529 | hsa:1499   | CTNNB1 | IPI00017292 | 18.468916 |
| hsa:1457   | CSNK2A1   | IPI00744507 | hsa:1499   | CTNNB1 | IPI00017292 | 18.468916 |
| hsa:2932   | GSK3B     | IPI00028570 | hsa:1499   | CTNNB1 | IPI00017292 | 18.468916 |
| hsa:3551   | IKBKB     | IPI00024709 | hsa:1499   | CTNNB1 | IPI00017292 | 18.468916 |
| hsa:2064   | ERBB2     | IPI00300384 | hsa:1499   | CTNNB1 | IPI00017292 | 18.468916 |
| hsa:1453   | CSNK1D    | IPI00011102 | hsa:1499   | CTNNB1 | IPI00017292 | 18.468916 |
| hsa:1147   | CHUK      | IPI00005104 | hsa:1499   | CTNNB1 | IPI00017292 | 18.468916 |
| hsa:4294   | MAP3K10   | IPI00295401 | hsa:3064   | HD     | IPI00002335 | 18.468916 |
| hsa:207    | AKT1      | IPI00012866 | hsa:3064   | HD     | IPI00002335 | 18.468916 |
| hsa:11200  | CHEK2     | IPI00014072 | hsa:3838   | KPNA2  | IPI00002214 | 18.468916 |
| hsa:23683  | PRKD3     | IPI00015538 | hsa:3838   | KPNA2  | IPI00002214 | 18.468916 |
| hsa:6446   | SGK       | IPI00297590 | hsa:3838   | KPNA2  | IPI00002214 | 18.468916 |
| hsa:3702   | ITK       | IPI00004566 | hsa:3838   | KPNA2  | IPI00002214 | 18.468916 |
| hsa:23683  | PRKD3     | IPI00015538 | hsa:3837   | KPNB1  | IPI00001639 | 18.468916 |
| hsa:1452   | CSNK1A1   | IPI00183400 | hsa:3836   | KPNA1  | IPI00303292 | 18.468916 |
| hsa:25     | ABL129892 | IPI00216969 | hsa:1499   | CTNNB1 | IPI00017292 | 18.468916 |
| hsa:4193   | MDM2      | IPI00025490 | hsa:8554   | PIAS1  | IPI00220424 | 18.02547  |
| hsa:4193   | MDM2      | IPI00025490 | hsa:64219  | PJA1   | IPI00294448 | 18.02547  |
| hsa:2130   | EWSR1     | IPI00872855 | hsa:138065 | RNF183 | IPI00177673 | 18.02547  |
| hsa:2130   | EWSR1     | IPI00872855 | hsa:6297   | SALL2  | IPI00144003 | 18.02547  |
| hsa:4193   | MDM2      | IPI00025490 | hsa:5371   | PML    | IPI00022348 | 18.02547  |
| hsa:5903   | RANBP2    | IPI00221325 | hsa:4193   | MDM2   | IPI00025490 | 18.02547  |
| hsa:2130   | EWSR1     | IPI00872855 | hsa:4591   | TRIM37 | IPI00016619 | 18.02547  |
| hsa:23118  | MAP3K7IP2 | IPI00419504 | hsa:7186   | TRAF2  | IPI00030278 | 18.02547  |
| hsa:257397 | MAP3K7IP3 | IPI00166840 | hsa:7186   | TRAF2  | IPI00030278 | 18.02547  |
| hsa:54764  | ZRANB1    | IPI00005347 | hsa:7189   | TRAF6  | IPI00743663 | 18.02547  |
| hsa:257397 | MAP3K7IP3 | IPI00166840 | hsa:7189   | TRAF6  | IPI00743663 | 18.02547  |
| hsa:23118  | MAP3K7IP2 | IPI00419504 | hsa:7189   | TRAF6  | IPI00743663 | 18.02547  |
| hsa:2130   | EWSR1     | IPI00872855 | hsa:580    | BARD1  | IPI00017746 | 18.02547  |
| hsa:23118  | MAP3K7IP2 | IPI00419504 | hsa:331    | BIRC4  | IPI00303890 | 18.02547  |
| hsa:23429  | RYBP      | IPI00296594 | hsa:6015   | RING1  | IPI00641330 | 18.02547  |
| hsa:23429  | RYBP      | IPI00296594 | hsa:6045   | RNF2   | IPI00026993 | 18.02547  |
| hsa:2130   | EWSR1     | IPI00872855 | hsa:138065 | RNF183 | IPI00177673 | 18.02547  |
| hsa:2130   | EWSR1     | IPI00872855 | hsa:4591   | TRIM37 | IPI00016619 | 18.02547  |
| hsa:2130   | EWSR1     | IPI00872855 | hsa:6297   | SALL2  | IPI00144003 | 18.02547  |
| hsa:23429  | RYBP      | IPI00296594 | hsa:6015   | RING1  | IPI00641330 | 18.02547  |
| hsa:9727   | RAB11FIP3 | IPI00024426 | hsa:8766   | RAB11A | IPI00429190 | 17.727673 |
| hsa:9727   | RAB11FIP3 | IPI00024426 | hsa:57111  | RAB25  | IPI00027993 | 17.727673 |
| hsa:9727   | RAB11FIP3 | IPI00024426 | hsa:9230   | RAB11B | IPI00020436 | 17.727673 |
| hsa:9727   | RAB11FIP3 | IPI00024426 | hsa:378    | ARF4   | IPI00215918 | 17.727673 |
| hsa:9727   | RAB11FIP3 | IPI00024426 | hsa:382    | ARF6   | IPI00215920 | 17.727673 |
| hsa:6275   | S100A4    | IPI00032313 | hsa:4735   | 2-Sep  | IPI00014177 | 17.727673 |
| hsa:801    | CALM1     | unknown     | hsa:3845   | KRAS   | IPI00423568 | 17.727673 |
| hsa:801    | CALM1     | unknown     | hsa:6236   | RRAD   | IPI00375333 | 17.727673 |
| hsa:801    | CALM1     | unknown     | hsa:5899   | RALB   | IPI00004397 | 17.727673 |
| hsa:801    | CALM1     | unknown     | hsa:5898   | RALA   | IPI00217519 | 17.727673 |
| hsa:801    | CALM1     | unknown     | hsa:6014   | RIT2   | IPI00163763 | 17.727673 |
| hsa:801    | CALM1     | unknown     | hsa:5865   | RAB3B  | IPI00300562 | 17.727673 |
| hsa:808    | CALM3     | unknown     | hsa:5865   | RAB3B  | IPI00300562 | 17.727673 |
| hsa:805    | CALM2801  | IPI00075248 | hsa:5865   | RAB3B  | IPI00300562 | 17.727673 |

|           |           |             |           |         |             |           |
|-----------|-----------|-------------|-----------|---------|-------------|-----------|
| hsa:5589  | PRKCSH    | IPI00026154 | hsa:379   | ARL4D   | IPI00027971 | 17.727673 |
| hsa:826   | CAPNS1    | IPI00025084 | hsa:5861  | RAB1A   | IPI00005719 | 17.727673 |
| hsa:9185  | REPS2     | IPI00382936 | hsa:5899  | RALB    | IPI00004397 | 17.727673 |
| hsa:85021 | REPS1     | IPI00337530 | hsa:5899  | RALB    | IPI00004397 | 17.727673 |
| hsa:6279  | S100A8    | IPI00007047 | hsa:64284 | RAB17   | IPI00007866 | 17.727673 |
| hsa:808   | CALM3     | unknown     | hsa:5898  | RALA    | IPI00217519 | 17.727673 |
| hsa:808   | CALM3     | unknown     | hsa:5899  | RALB    | IPI00004397 | 17.727673 |
| hsa:5357  | PLS1      | IPI00032304 | hsa:382   | ARF6    | IPI00215920 | 17.727673 |
| hsa:9727  | RAB11FIP3 | IPI00024426 | hsa:381   | ARF5    | IPI00215919 | 17.727673 |
| hsa:85021 | REPS1     | IPI00337530 | hsa:5898  | RALA    | IPI00217519 | 17.727673 |
| hsa:84440 | RAB11FIP4 | IPI00174771 | hsa:8766  | RAB11A  | IPI00429190 | 17.727673 |
| hsa:10519 | CIB1      | IPI00018451 | hsa:5881  | RAC3    | IPI00023138 | 17.727673 |
| hsa:5589  | PRKCSH    | IPI00026154 | hsa:379   | ARF4L   | IPI00027971 | 17.727673 |
| hsa:826   | CAPNS1    | IPI00025084 | hsa:5861  | RAB1A   | IPI00005719 | 17.727673 |
| hsa:7185  | TRAF1     | IPI00011549 | hsa:9020  | MAP3K14 | IPI00016099 | 17.641949 |
| hsa:7185  | TRAF1     | IPI00011549 | hsa:8767  | RIPK2   | IPI00021917 | 17.641949 |
| hsa:7185  | TRAF1     | IPI00011549 | hsa:6714  | SRC     | IPI00641230 | 17.641949 |
| hsa:6711  | SPTBN1    | IPI00005614 | hsa:823   | CAPN1   | IPI00011285 | 17.611279 |
| hsa:2260  | FGFR1     | IPI00005142 | hsa:3837  | KPNB1   | IPI00001639 | 17.5545   |
| hsa:3791  | KDR       | IPI00021396 | hsa:1499  | CTNNB1  | IPI00017292 | 17.5545   |
| hsa:2321  | FLT1      | IPI00018335 | hsa:1499  | CTNNB1  | IPI00017292 | 17.5545   |
| hsa:2260  | FGFR1     | IPI00005142 | hsa:1499  | CTNNB1  | IPI00017292 | 17.5545   |
| hsa:6453  | ITSN1     | IPI00304740 | hsa:3265  | HRAS    | IPI00000006 | 17.526222 |
| hsa:6453  | ITSN1     | IPI00304740 | hsa:998   | CDC42   | IPI00007189 | 17.526222 |
| hsa:7046  | TGFBR1    | IPI00005733 | hsa:4091  | SMAD6   | IPI00012869 | 17.330023 |
| hsa:7046  | TGFBR1    | IPI00005733 | hsa:4089  | SMAD4   | IPI00013404 | 17.330023 |
| hsa:7046  | TGFBR1    | IPI00005733 | hsa:4088  | SMAD3   | IPI00024305 | 17.330023 |
| hsa:7046  | TGFBR1    | IPI00005733 | hsa:4092  | SMAD7   | IPI00005079 | 17.330023 |
| hsa:7046  | TGFBR1    | IPI00005733 | hsa:4086  | SMAD1   | IPI00019549 | 17.330023 |
| hsa:7046  | TGFBR1    | IPI00005733 | hsa:4087  | SMAD2   | IPI00019548 | 17.330023 |
| hsa:90    | ACVR1     | IPI00029219 | hsa:4093  | SMAD9   | IPI00005223 | 17.330023 |
| hsa:90    | ACVR1     | IPI00029219 | hsa:4090  | SMAD5   | IPI00017730 | 17.330023 |
| hsa:90    | ACVR1     | IPI00029219 | hsa:4086  | SMAD1   | IPI00019549 | 17.330023 |
| hsa:658   | BMPR1B    | IPI00010862 | hsa:4092  | SMAD7   | IPI00005079 | 17.330023 |
| hsa:658   | BMPR1B    | IPI00010862 | hsa:4091  | SMAD6   | IPI00012869 | 17.330023 |
| hsa:91    | ACVR1B    | IPI00005732 | hsa:4092  | SMAD7   | IPI00005079 | 17.330023 |
| hsa:657   | BMPR1A    | IPI00005731 | hsa:4086  | SMAD1   | IPI00019549 | 17.330023 |
| hsa:91    | ACVR1B    | IPI00005732 | hsa:4089  | SMAD4   | IPI00013404 | 17.330023 |
| hsa:91    | ACVR1B    | IPI00005732 | hsa:4087  | SMAD2   | IPI00019548 | 17.330023 |
| hsa:2885  | GRB2      | IPI00021327 | hsa:58480 | RHOU    | IPI00009644 | 17.324771 |
| hsa:2885  | GRB2      | IPI00021327 | hsa:3265  | HRAS    | IPI00000006 | 17.324771 |
| hsa:1793  | DOCK1     | IPI00015286 | hsa:391   | RHOG    | IPI00017342 | 17.324771 |
| hsa:10451 | VAV3      | IPI00299763 | hsa:391   | RHOG    | IPI00017342 | 17.324771 |
| hsa:10451 | VAV3      | IPI00299763 | hsa:387   | RHOA    | IPI00478231 | 17.324771 |
| hsa:4690  | NCK1      | IPI00028065 | hsa:58480 | RHOU    | IPI00009644 | 17.324771 |
| hsa:4690  | NCK1      | IPI00028065 | hsa:6237  | RRAS    | IPI00020418 | 17.324771 |
| hsa:782   | CACNB1    | IPI00183965 | hsa:2669  | GEM     | IPI00022710 | 17.324771 |
| hsa:9853  | RUSC2     | IPI00444656 | hsa:5861  | RAB1A   | IPI00005719 | 17.324771 |
| hsa:1794  | DOCK2     | IPI00022449 | hsa:5879  | RAC1    | IPI00010271 | 17.324771 |
| hsa:10451 | VAV3      | IPI00299763 | hsa:5879  | RAC1    | IPI00010271 | 17.324771 |
| hsa:10458 | BAIAP2    | IPI00299088 | hsa:5879  | RAC1    | IPI00010271 | 17.324771 |
| hsa:4690  | NCK1      | IPI00028065 | hsa:5879  | RAC1    | IPI00010271 | 17.324771 |
| hsa:1793  | DOCK1     | IPI00015286 | hsa:5879  | RAC1    | IPI00010271 | 17.324771 |
| hsa:23607 | CD2AP     | IPI00412771 | hsa:5867  | RAB4A   | IPI00480056 | 17.324771 |
| hsa:1794  | DOCK2     | IPI00022449 | hsa:5880  | RAC2    | IPI00010270 | 17.324771 |
| hsa:782   | CACNB1    | IPI00183965 | hsa:28954 | REM1    | IPI00289912 | 17.324771 |
| hsa:785   | CACNB4    | IPI00876906 | hsa:28954 | REM1    | IPI00289912 | 17.324771 |
| hsa:783   | CACNB2    | IPI00000867 | hsa:28954 | REM1    | IPI00289912 | 17.324771 |
| hsa:10458 | BAIAP2    | IPI00299088 | hsa:998   | CDC42   | IPI00007189 | 17.324771 |
| hsa:274   | BIN1      | IPI00186966 | hsa:5906  | RAP1A   | IPI00019345 | 17.324771 |

|            |           |             |            |       |             |           |
|------------|-----------|-------------|------------|-------|-------------|-----------|
| hsa:9853   | RUSC2     | IPI00444656 | hsa:81876  | RAB1B | IPI00008964 | 17.324771 |
| hsa:354    | KLK3      | IPI00010858 | hsa:5340   | PLG   | IPI00019580 | 17.285546 |
| hsa:3249   | HPN       | IPI00395826 | hsa:3082   | HGF   | IPI00025767 | 17.285546 |
| hsa:6768   | ST14      | IPI00001922 | hsa:3082   | HGF   | IPI00025767 | 17.285546 |
| hsa:7204   | TRIO      | IPI00442035 | hsa:387    | RHOA  | IPI00478231 | 16.855448 |
| hsa:4214   | MAP3K1    | IPI00855985 | hsa:7314   | UBB   | unknown     | 16.427467 |
| hsa:7189   | TRAF6     | IPI00743663 | hsa:84231  | TRAF7 | IPI00395631 | 16.323064 |
| hsa:5600   | MAPK11    | IPI00019473 | hsa:7157   | TP53  | IPI00025087 | 16.171787 |
| hsa:5747   | PTK2      | IPI00012885 | hsa:7157   | TP53  | IPI00025087 | 16.171787 |
| hsa:1025   | CDK9      | IPI00301923 | hsa:7157   | TP53  | IPI00025087 | 16.171787 |
| hsa:25     | ABL129892 | IPI00216969 | hsa:7157   | TP53  | IPI00025087 | 16.171787 |
| hsa:5599   | MAPK8     | IPI00024672 | hsa:7157   | TP53  | IPI00025087 | 16.171787 |
| hsa:1453   | CSNK1D    | IPI00011102 | hsa:7157   | TP53  | IPI00025087 | 16.171787 |
| hsa:1147   | CHUK      | IPI00005104 | hsa:7157   | TP53  | IPI00025087 | 16.171787 |
| hsa:1452   | CSNK1A1   | IPI00183400 | hsa:7157   | TP53  | IPI00025087 | 16.171787 |
| hsa:112858 | TP53RK    | IPI00290305 | hsa:7157   | TP53  | IPI00025087 | 16.171787 |
| hsa:204851 | HIPK1     | IPI00302302 | hsa:7157   | TP53  | IPI00025087 | 16.171787 |
| hsa:2932   | GSK3B     | IPI00028570 | hsa:7157   | TP53  | IPI00025087 | 16.171787 |
| hsa:6789   | STK4      | IPI00011488 | hsa:7157   | TP53  | IPI00025087 | 16.171787 |
| hsa:1111   | CHEK1     | IPI00023664 | hsa:7157   | TP53  | IPI00025087 | 16.171787 |
| hsa:1263   | PLK3      | IPI00304186 | hsa:7157   | TP53  | IPI00025087 | 16.171787 |
| hsa:5602   | MAPK10    | IPI00023547 | hsa:7157   | TP53  | IPI00025087 | 16.171787 |
| hsa:5601   | MAPK9     | IPI00024673 | hsa:7157   | TP53  | IPI00025087 | 16.171787 |
| hsa:6790   | AURKA     | IPI00298940 | hsa:7157   | TP53  | IPI00025087 | 16.171787 |
| hsa:6794   | STK11     | IPI00219072 | hsa:7157   | TP53  | IPI00025087 | 16.171787 |
| hsa:7443   | VRK1      | IPI00019640 | hsa:7157   | TP53  | IPI00025087 | 16.171787 |
| hsa:5595   | MAPK3     | IPI00018195 | hsa:7157   | TP53  | IPI00025087 | 16.171787 |
| hsa:5578   | PRKCA     | IPI00385449 | hsa:7157   | TP53  | IPI00025087 | 16.171787 |
| hsa:5594   | MAPK1     | IPI00003479 | hsa:7157   | TP53  | IPI00025087 | 16.171787 |
| hsa:5610   | EIF2AK2   | IPI00019463 | hsa:7157   | TP53  | IPI00025087 | 16.171787 |
| hsa:1020   | CDK5      | IPI00023530 | hsa:7157   | TP53  | IPI00025087 | 16.171787 |
| hsa:1017   | CDK2      | IPI00031681 | hsa:7157   | TP53  | IPI00025087 | 16.171787 |
| hsa:983    | CDC2      | IPI00073536 | hsa:7157   | TP53  | IPI00025087 | 16.171787 |
| hsa:1457   | CSNK2A1   | IPI00744507 | hsa:7157   | TP53  | IPI00025087 | 16.171787 |
| hsa:25     | ABL129892 | IPI00216969 | hsa:7161   | TP73  | IPI00006160 | 16.171787 |
| hsa:1017   | CDK2      | IPI00031681 | hsa:7161   | TP73  | IPI00006160 | 16.171787 |
| hsa:983    | CDC2      | IPI00073536 | hsa:7161   | TP73  | IPI00006160 | 16.171787 |
| hsa:11200  | CHEK2     | IPI00014072 | hsa:7157   | TP53  | IPI00025087 | 16.171787 |
| hsa:5347   | PLK1      | IPI00021248 | hsa:7157   | TP53  | IPI00025087 | 16.171787 |
| hsa:55872  | PBK       | IPI00306708 | hsa:7157   | TP53  | IPI00025087 | 16.171787 |
| hsa:8550   | MAPKAPK5  | IPI00160672 | hsa:7157   | TP53  | IPI00025087 | 16.171787 |
| hsa:660    | BMX       | IPI00020899 | hsa:7157   | TP53  | IPI00025087 | 16.171787 |
| hsa:394    | ARHGAP5   | IPI00013988 | hsa:390    | RND3  | IPI00001437 | 16.128657 |
| hsa:8826   | IQGAP1    | IPI00009342 | hsa:998    | CDC42 | IPI00007189 | 16.031245 |
| hsa:10788  | IQGAP2    | IPI00299048 | hsa:391    | RHOG  | IPI00017342 | 16.031245 |
| hsa:10788  | IQGAP2    | IPI00299048 | hsa:998    | CDC42 | IPI00007189 | 16.031245 |
| hsa:8826   | IQGAP1    | IPI00009342 | hsa:382    | ARF6  | IPI00215920 | 16.031245 |
| hsa:10788  | IQGAP2    | IPI00299048 | hsa:5879   | RAC1  | IPI00010271 | 16.031245 |
| hsa:8826   | IQGAP1    | IPI00009342 | hsa:5879   | RAC1  | IPI00010271 | 16.031245 |
| hsa:4763   | NF1       | IPI00299512 | hsa:3265   | HRAS  | IPI00000006 | 16.031245 |
| hsa:388    | RHOB      | IPI00000041 | hsa:85415  | RHPN2 | IPI00292548 | 15.864252 |
| hsa:387    | RHOA      | IPI00478231 | hsa:114822 | RHPN1 | IPI00154752 | 15.864252 |
| hsa:387    | RHOA      | IPI00478231 | hsa:85415  | RHPN2 | IPI00292548 | 15.864252 |
| hsa:5879   | RAC1      | IPI00010271 | hsa:57144  | PAK7  | IPI00001814 | 15.788264 |
| hsa:5879   | RAC1      | IPI00010271 | hsa:5062   | PAK2  | IPI00787208 | 15.788264 |
| hsa:5879   | RAC1      | IPI00010271 | hsa:5058   | PAK1  | IPI00656138 | 15.788264 |
| hsa:998    | CDC42     | IPI00007189 | hsa:56924  | PAK6  | IPI00024584 | 15.788264 |
| hsa:998    | CDC42     | IPI00007189 | hsa:57144  | PAK7  | IPI00001814 | 15.788264 |
| hsa:998    | CDC42     | IPI00007189 | hsa:10298  | PAK4  | IPI00014068 | 15.788264 |
| hsa:998    | CDC42     | IPI00007189 | hsa:5062   | PAK2  | IPI00787208 | 15.788264 |

|            |          |             |            |          |             |           |
|------------|----------|-------------|------------|----------|-------------|-----------|
| hsa:5908   | RAP1B    | IPI00015148 | hsa:5062   | PAK2     | IPI00787208 | 15.788264 |
| hsa:57381  | RHOJ     | IPI00027952 | hsa:5058   | PAK1     | IPI00656138 | 15.788264 |
| hsa:998    | CDC42    | IPI00007189 | hsa:5058   | PAK1     | IPI00656138 | 15.788264 |
| hsa:5175   | PECAM1   | IPI00295618 | hsa:3728   | JUP      | IPI00554711 | 15.725668 |
| hsa:3106   | HLA-B    | unknown     | hsa:3839   | KPNA3    | IPI00299033 | 15.725668 |
| hsa:3117   | HLA-DQA1 | IPI00289658 | hsa:55183  | RIF1     | IPI00375454 | 15.725668 |
| hsa:91653  | BOC      | IPI00747930 | hsa:55183  | RIF1     | IPI00375454 | 15.725668 |
| hsa:5678   | PSG9     | IPI00293461 | hsa:55183  | RIF1     | IPI00375454 | 15.725668 |
| hsa:5175   | PECAM1   | IPI00295618 | hsa:1499   | CTNNB1   | IPI00017292 | 15.725668 |
| hsa:50937  | CDON     | IPI00027220 | hsa:1499   | CTNNB1   | IPI00017292 | 15.725668 |
| hsa:91653  | BOC      | IPI00747930 | hsa:1499   | CTNNB1   | IPI00017292 | 15.725668 |
| hsa:3117   | HLA-DQA1 | IPI00289658 | hsa:55183  | RIF1     | IPI00375454 | 15.725668 |
| hsa:5678   | PSG9     | IPI00293461 | hsa:55183  | RIF1     | IPI00375454 | 15.725668 |
| hsa:91653  | BOC      | IPI00747930 | hsa:55183  | RIF1     | IPI00375454 | 15.725668 |
| hsa:5921   | RASA1    | IPI00026262 | hsa:394    | ARHGAP5  | IPI00013988 | 15.690244 |
| hsa:5154   | PDGFA    | IPI00021833 | hsa:5156   | PDGFRA   | IPI00027721 | 15.626983 |
| hsa:5155   | PDGFB    | IPI00000044 | hsa:5156   | PDGFRA   | IPI00027721 | 15.626983 |
| hsa:5155   | PDGFB    | IPI00000044 | hsa:5159   | PDGFRB   | IPI00015902 | 15.626983 |
| hsa:7422   | VEGFA    | IPI00852889 | hsa:3490   | IGFBP7   | IPI00016915 | 15.626983 |
| hsa:7422   | VEGFA    | IPI00852889 | hsa:6405   | SEMA3F   | IPI00298003 | 15.626983 |
| hsa:7422   | VEGFA    | IPI00852889 | hsa:2321   | FLT1     | IPI00018335 | 15.626983 |
| hsa:5155   | PDGFB    | IPI00000044 | hsa:3339   | HSPG2    | IPI00024284 | 15.626983 |
| hsa:5154   | PDGFA    | IPI00021833 | hsa:3339   | HSPG2    | IPI00024284 | 15.626983 |
| hsa:80310  | PDGFD    | IPI00018822 | hsa:5159   | PDGFRB   | IPI00015902 | 15.626983 |
| hsa:7422   | VEGFA    | IPI00852889 | hsa:3791   | KDR      | IPI00021396 | 15.626983 |
| hsa:56034  | PDGFC    | IPI00099977 | hsa:5156   | PDGFRA   | IPI00027721 | 15.626983 |
| hsa:7423   | VEGFB    | IPI00028075 | hsa:2321   | FLT1     | IPI00018335 | 15.626983 |
| hsa:5228   | PGF      | IPI00028074 | hsa:2321   | FLT1     | IPI00018335 | 15.626983 |
| hsa:6009   | RHEB     | IPI00016669 | hsa:2475   | FRAP1    | IPI00031410 | 15.620187 |
| hsa:6009   | RHEB     | IPI00016669 | hsa:472    | ATM      | IPI00298306 | 15.620187 |
| hsa:6009   | RHEB     | IPI00016669 | hsa:545    | ATR      | IPI00412298 | 15.620187 |
| hsa:121268 | RHEBL1   | IPI00556561 | hsa:2475   | FRAP1    | IPI00031410 | 15.620187 |
| hsa:8767   | RIPK2    | IPI00021917 | hsa:7132   | TNFRSF1A | IPI00018880 | 15.507495 |
| hsa:3553   | IL1B     | IPI00307223 | hsa:7850   | IL1R2    | IPI00021382 | 15.249133 |
| hsa:3553   | IL1B     | IPI00307223 | hsa:3554   | IL1R1    | IPI00027508 | 15.249133 |
| hsa:3552   | IL1A     | IPI00003096 | hsa:3554   | IL1R1    | IPI00027508 | 15.249133 |
| hsa:3552   | IL1A     | IPI00003096 | hsa:7850   | IL1R2    | IPI00021382 | 15.249133 |
| hsa:3606   | IL18     | IPI00290198 | hsa:8808   | IL1RL2   | IPI00795930 | 15.249133 |
| hsa:3606   | IL18     | IPI00290198 | hsa:8807   | IL18RAP  | IPI00021998 | 15.249133 |
| hsa:3606   | IL18     | IPI00290198 | hsa:10068  | IL18BP   | IPI00001528 | 15.249133 |
| hsa:84639  | IL1F10   | IPI00103482 | hsa:3554   | IL1R1    | IPI00027508 | 15.249133 |
| hsa:3557   | IL1RN    | IPI00000045 | hsa:3554   | IL1R1    | IPI00027508 | 15.249133 |
| hsa:3557   | IL1RN    | IPI00000045 | hsa:7850   | IL1R2    | IPI00021382 | 15.249133 |
| hsa:27178  | IL1F7    | IPI00218391 | hsa:10068  | IL18BP   | IPI00001528 | 15.249133 |
| hsa:3104   | ZBTB48   | IPI00018893 | hsa:653121 | ZBTB8    | unknown     | 15.021225 |
| hsa:9757   | MLL4     | IPI00218823 | hsa:57473  | ZNF512B  | IPI00074893 | 15.021225 |
| hsa:3104   | HKR3     | IPI00018893 | hsa:653121 | ZBTB8    | unknown     | 15.021225 |
| hsa:8767   | RIPK2    | IPI00021917 | hsa:3654   | IRAK1    | IPI00293652 | 14.994274 |
| hsa:8738   | CRADD    | IPI00020364 | hsa:8737   | RIPK1    | IPI00013773 | 14.994274 |
| hsa:2886   | GRB7     | IPI00448767 | hsa:27289  | RND1     | IPI00023211 | 14.987942 |
| hsa:54518  | APBB1IP  | IPI00376219 | hsa:5906   | RAP1A    | IPI00019345 | 14.987942 |
| hsa:868    | CBLB     | IPI00292856 | hsa:8874   | ARHGEF7  | IPI00449906 | 14.930405 |
| hsa:5364   | PLXNB1   | IPI00455329 | hsa:27289  | RND1     | IPI00023211 | 14.637223 |
| hsa:5361   | PLXNA1   | IPI00552671 | hsa:29984  | RHOD     | IPI00010841 | 14.637223 |
| hsa:5361   | PLXNA1   | IPI00552671 | hsa:27289  | RND1     | IPI00023211 | 14.637223 |
| hsa:5364   | PLXNB1   | IPI00455329 | hsa:390    | RND3     | IPI00001437 | 14.637223 |
| hsa:5364   | PLXNB1   | IPI00455329 | hsa:5879   | RAC1     | IPI00010271 | 14.637223 |
| hsa:23654  | PLXNB2   | IPI00853369 | hsa:27289  | RND1     | IPI00023211 | 14.637223 |
| hsa:5781   | PTPN11   | IPI00658023 | hsa:6772   | STAT1    | IPI00030781 | 14.468929 |
| hsa:5781   | PTPN11   | IPI00658023 | hsa:6777   | STAT5B   | IPI00103415 | 14.468929 |

|           |           |             |           |        |             |           |
|-----------|-----------|-------------|-----------|--------|-------------|-----------|
| hsa:5781  | PTPN11    | IPI00658023 | hsa:6776  | STAT5A | IPI00030783 | 14.468929 |
| hsa:5777  | PTPN6     | IPI00218604 | hsa:6778  | STAT6  | IPI00030782 | 14.468929 |
| hsa:5777  | PTPN6     | IPI00218604 | hsa:6777  | STAT5B | IPI00103415 | 14.468929 |
| hsa:5781  | PTPN11    | IPI00658023 | hsa:6774  | STAT3  | IPI00784414 | 14.468929 |
| hsa:7204  | TRIO      | IPI00442035 | hsa:5879  | RAC1   | IPI00010271 | 14.458729 |
| hsa:10188 | TNK2      | IPI00167089 | hsa:51429 | SNX9   | IPI00001883 | 14.386589 |
| hsa:54106 | TLR911344 | IPI00010140 | hsa:59307 | SIGIRR | IPI00029155 | 14.381158 |
| hsa:7100  | TLR5      | IPI00298758 | hsa:59307 | SIGIRR | IPI00029155 | 14.381158 |
| hsa:7099  | TLR4      | IPI00008673 | hsa:59307 | SIGIRR | IPI00029155 | 14.381158 |
| hsa:3688  | ITGB1     | IPI00217563 | hsa:3480  | IGF1R  | IPI00027232 | 14.319389 |
| hsa:4486  | MST1R     | IPI00030273 | hsa:5970  | RELA   | IPI00386448 | 14.214998 |
| hsa:2247  | FGF2      | IPI00154603 | hsa:53834 | FGFRL1 | IPI00296561 | 14.093896 |
| hsa:2247  | FGF2      | IPI00154603 | hsa:2263  | FGFR2  | IPI00010680 | 14.093896 |
| hsa:8074  | FGF23     | IPI00026407 | hsa:2261  | FGFR3  | IPI00027174 | 14.093896 |
| hsa:8817  | FGF18     | IPI00008830 | hsa:2261  | FGFR3  | IPI00027174 | 14.093896 |
| hsa:8822  | FGF17     | IPI00028483 | hsa:2261  | FGFR3  | IPI00027174 | 14.093896 |
| hsa:2250  | FGF5      | IPI00295390 | hsa:2261  | FGFR3  | IPI00027174 | 14.093896 |
| hsa:2249  | FGF4      | IPI00029760 | hsa:2261  | FGFR3  | IPI00027174 | 14.093896 |
| hsa:2248  | FGF3      | IPI00005729 | hsa:2261  | FGFR3  | IPI00027174 | 14.093896 |
| hsa:2252  | FGF7      | IPI00010403 | hsa:2261  | FGFR3  | IPI00027174 | 14.093896 |
| hsa:2251  | FGF6      | IPI00022396 | hsa:2261  | FGFR3  | IPI00027174 | 14.093896 |
| hsa:2247  | FGF2      | IPI00154603 | hsa:2261  | FGFR3  | IPI00027174 | 14.093896 |
| hsa:2254  | FGF9      | IPI00011172 | hsa:2261  | FGFR3  | IPI00027174 | 14.093896 |
| hsa:2253  | FGF8      | IPI00219933 | hsa:2261  | FGFR3  | IPI00027174 | 14.093896 |
| hsa:2246  | FGF1      | IPI00007792 | hsa:2261  | FGFR3  | IPI00027174 | 14.093896 |
| hsa:8817  | FGF18     | IPI00008830 | hsa:2264  | FGFR4  | IPI00304578 | 14.093896 |
| hsa:8822  | FGF17     | IPI00028483 | hsa:2264  | FGFR4  | IPI00304578 | 14.093896 |
| hsa:2254  | FGF9      | IPI00011172 | hsa:2264  | FGFR4  | IPI00304578 | 14.093896 |
| hsa:2250  | FGF5      | IPI00295390 | hsa:2264  | FGFR4  | IPI00304578 | 14.093896 |
| hsa:2249  | FGF4      | IPI00029760 | hsa:2264  | FGFR4  | IPI00304578 | 14.093896 |
| hsa:2248  | FGF3      | IPI00005729 | hsa:2264  | FGFR4  | IPI00304578 | 14.093896 |
| hsa:2252  | FGF7      | IPI00010403 | hsa:2264  | FGFR4  | IPI00304578 | 14.093896 |
| hsa:9965  | FGF19     | IPI00032908 | hsa:2264  | FGFR4  | IPI00304578 | 14.093896 |
| hsa:2253  | FGF8      | IPI00219933 | hsa:2264  | FGFR4  | IPI00304578 | 14.093896 |
| hsa:2251  | FGF6      | IPI00022396 | hsa:2264  | FGFR4  | IPI00304578 | 14.093896 |
| hsa:2247  | FGF2      | IPI00154603 | hsa:2264  | FGFR4  | IPI00304578 | 14.093896 |
| hsa:2246  | FGF1      | IPI00007792 | hsa:2264  | FGFR4  | IPI00304578 | 14.093896 |
| hsa:2252  | FGF7      | IPI00010403 | hsa:3339  | HSPG2  | IPI00024284 | 14.093896 |
| hsa:2247  | FGF2      | IPI00154603 | hsa:3339  | HSPG2  | IPI00024284 | 14.093896 |
| hsa:2252  | FGF7      | IPI00010403 | hsa:2260  | FGFR1  | IPI00005142 | 14.093896 |
| hsa:2251  | FGF6      | IPI00022396 | hsa:2260  | FGFR1  | IPI00005142 | 14.093896 |
| hsa:8817  | FGF18     | IPI00008830 | hsa:2260  | FGFR1  | IPI00005142 | 14.093896 |
| hsa:8822  | FGF17     | IPI00028483 | hsa:2260  | FGFR1  | IPI00005142 | 14.093896 |
| hsa:2254  | FGF9      | IPI00011172 | hsa:2260  | FGFR1  | IPI00005142 | 14.093896 |
| hsa:2253  | FGF8      | IPI00219933 | hsa:2260  | FGFR1  | IPI00005142 | 14.093896 |
| hsa:2249  | FGF4      | IPI00029760 | hsa:2260  | FGFR1  | IPI00005142 | 14.093896 |
| hsa:2248  | FGF3      | IPI00005729 | hsa:2260  | FGFR1  | IPI00005142 | 14.093896 |
| hsa:2250  | FGF5      | IPI00295390 | hsa:2260  | FGFR1  | IPI00005142 | 14.093896 |
| hsa:2247  | FGF2      | IPI00154603 | hsa:2260  | FGFR1  | IPI00005142 | 14.093896 |
| hsa:2246  | FGF1      | IPI00007792 | hsa:2260  | FGFR1  | IPI00005142 | 14.093896 |
| hsa:2251  | FGF6      | IPI00022396 | hsa:2263  | FGFR2  | IPI00010680 | 14.093896 |
| hsa:2249  | FGF4      | IPI00029760 | hsa:2263  | FGFR2  | IPI00010680 | 14.093896 |
| hsa:2248  | FGF3      | IPI00005729 | hsa:2263  | FGFR2  | IPI00010680 | 14.093896 |
| hsa:8074  | FGF23     | IPI00026407 | hsa:2263  | FGFR2  | IPI00010680 | 14.093896 |
| hsa:8817  | FGF18     | IPI00008830 | hsa:2263  | FGFR2  | IPI00010680 | 14.093896 |
| hsa:8822  | FGF17     | IPI00028483 | hsa:2263  | FGFR2  | IPI00010680 | 14.093896 |
| hsa:2253  | FGF8      | IPI00219933 | hsa:2263  | FGFR2  | IPI00010680 | 14.093896 |
| hsa:2250  | FGF5      | IPI00295390 | hsa:2263  | FGFR2  | IPI00010680 | 14.093896 |
| hsa:2255  | FGF10     | IPI00007307 | hsa:2263  | FGFR2  | IPI00010680 | 14.093896 |
| hsa:2254  | FGF9      | IPI00011172 | hsa:2263  | FGFR2  | IPI00010680 | 14.093896 |

|            |           |             |            |             |             |           |
|------------|-----------|-------------|------------|-------------|-------------|-----------|
| hsa:2252   | FGF7      | IPI00010403 | hsa:2263   | FGFR2       | IPI00010680 | 14.093896 |
| hsa:2246   | FGF1      | IPI00007792 | hsa:2263   | FGFR2       | IPI00010680 | 14.093896 |
| hsa:5587   | PRKD1     | IPI00782950 | hsa:11033  | CENTA1      | IPI00009992 | 13.704014 |
| hsa:547    | KIF1A     | IPI00604711 | hsa:28964  | GIT1        | IPI00384861 | 13.460578 |
| hsa:55770  | EXOC2     | IPI00783559 | hsa:5898   | RALA        | IPI00217519 | 13.243202 |
| hsa:5365   | PLXNB3    | IPI00155729 | hsa:6014   | RIT2        | IPI00163763 | 13.243202 |
| hsa:9600   | PITPNM1   | IPI00791675 | hsa:387    | RHOA        | IPI00478231 | 13.243202 |
| hsa:6790   | AURKA     | IPI00298940 | hsa:9793   | CKAP5       | IPI00028275 | 13.231462 |
| hsa:5581   | PRKCE     | IPI00024539 | hsa:1315   | COPB1       | IPI00295851 | 13.231462 |
| hsa:3717   | JAK2      | IPI00031016 | hsa:5519   | PPP2R1B     | IPI00294178 | 13.231462 |
| hsa:5580   | PRKCD     | IPI00329236 | hsa:5591   | PRKDC       | IPI00296337 | 13.231462 |
| hsa:5599   | MAPK8     | IPI00024672 | hsa:5591   | PRKDC       | IPI00296337 | 13.231462 |
| hsa:25     | ABL129892 | IPI00216969 | hsa:5591   | PRKDC       | IPI00296337 | 13.231462 |
| hsa:4067   | LYN       | IPI00298625 | hsa:5591   | PRKDC       | IPI00296337 | 13.231462 |
| hsa:5584   | PRKCI     | IPI00016639 | hsa:23049  | SMG1        | IPI00639874 | 13.231462 |
| hsa:57787  | MARK4     | IPI00064797 | hsa:9891   | NUAK1       | IPI00028566 | 13.231462 |
| hsa:57787  | MARK4     | IPI00064797 | hsa:6794   | STK11       | IPI00219072 | 13.231462 |
| hsa:207    | AKT1      | IPI00012866 | hsa:5591   | PRKDC       | IPI00296337 | 13.231462 |
| hsa:1025   | CDK9      | IPI00301923 | hsa:27148  | STK36       | IPI00235407 | 13.231462 |
| hsa:1147   | CHUK      | IPI00005104 | hsa:5591   | PRKDC       | IPI00296337 | 13.231462 |
| hsa:4140   | MARK3     | IPI00183118 | hsa:9891   | NUAK1       | IPI00028566 | 13.231462 |
| hsa:23235  | SNF1LK2   | IPI00465291 | hsa:9891   | NUAK1       | IPI00028566 | 13.231462 |
| hsa:699    | BUB1      | IPI00783305 | hsa:10717  | AP4B1       | IPI00002150 | 13.231462 |
| hsa:54861  | SNRK      | IPI00470811 | hsa:9891   | NUAK1       | IPI00028566 | 13.231462 |
| hsa:54861  | SNRK      | IPI00470811 | hsa:6794   | STK11       | IPI00219072 | 13.231462 |
| hsa:4139   | MARK1     | IPI00185037 | hsa:9891   | NUAK1       | IPI00028566 | 13.231462 |
| hsa:4139   | MARK1     | IPI00185037 | hsa:57551  | TAOK1       | IPI00002232 | 13.231462 |
| hsa:4139   | MARK1     | IPI00185037 | hsa:6794   | STK11       | IPI00219072 | 13.231462 |
| hsa:2011   | MARK2     | IPI00555838 | hsa:9891   | NUAK1       | IPI00028566 | 13.231462 |
| hsa:207    | AKT1      | IPI00012866 | hsa:5518   | PPP2R1A     | IPI00554737 | 13.231462 |
| hsa:11035  | RIPK3     | IPI00294938 | hsa:5591   | PRKDC       | IPI00296337 | 13.231462 |
| hsa:4215   | MAP3K3    | IPI00017801 | hsa:5591   | PRKDC       | IPI00296337 | 13.231462 |
| hsa:4215   | MAP3K3    | IPI00017801 | hsa:5518   | PPP2R1A     | IPI00554737 | 13.231462 |
| hsa:4215   | MAP3K3    | IPI00017801 | hsa:5519   | PPP2R1B     | IPI00294178 | 13.231462 |
| hsa:54861  | SNRK      | IPI00470811 | hsa:8576   | STK16       | IPI00872027 | 13.231462 |
| hsa:8428   | STK24     | IPI00002212 | hsa:5518   | PPP2R1A     | IPI00554737 | 13.231462 |
| hsa:3611   | ILK       | IPI00013219 | hsa:22820  | COPG        | IPI00783982 | 13.231462 |
| hsa:10783  | NEK6      | IPI00550738 | hsa:26958  | COPG2114960 | IPI00002557 | 13.231462 |
| hsa:10783  | NEK6      | IPI00550738 | hsa:54892  | NCAPG2      | IPI00797030 | 13.231462 |
| hsa:10783  | NEK6      | IPI00550738 | hsa:79711  | IP04        | IPI00156374 | 13.231462 |
| hsa:9641   | IKBKE     | IPI00029045 | hsa:5518   | PPP2R1A     | IPI00554737 | 13.231462 |
| hsa:51035  | LOC51035  | IPI00027378 | hsa:1019   | CDK4        | IPI00007811 | 13.231462 |
| hsa:3611   | ILK       | IPI00013219 | hsa:64210  | MMS19       | IPI00180322 | 13.231462 |
| hsa:6446   | SGK       | IPI00297590 | hsa:79711  | IP04        | IPI00156374 | 13.231462 |
| hsa:51035  | LOC51035  | IPI00027378 | hsa:7046   | TGFBR1      | IPI00005733 | 13.231462 |
| hsa:51366  | UBR5      | IPI00026320 | hsa:5594   | MAPK1       | IPI00003479 | 13.231462 |
| hsa:51035  | LOC51035  | IPI00027378 | hsa:90     | ACVR1       | IPI00029219 | 13.231462 |
| hsa:55968  | NSFL1C    | IPI00100197 | hsa:983    | CDC2        | IPI00073536 | 13.231462 |
| hsa:5159   | PDGFRB    | IPI00015902 | hsa:1315   | COPB1       | IPI00295851 | 13.231462 |
| hsa:2011   | MARK2     | IPI00555838 | hsa:2932   | GSK3B       | IPI00028570 | 13.231462 |
| hsa:51035  | LOC51035  | IPI00027378 | hsa:658    | BMPR1B      | IPI00010862 | 13.231462 |
| hsa:124402 | FAM100A   | IPI00152091 | hsa:112950 | MED8        | IPI00419516 | 13.231462 |
| hsa:9891   | NUAK1     | IPI00028566 | hsa:5519   | PPP2R1B     | IPI00294178 | 13.231462 |
| hsa:2011   | MARK2     | IPI00555838 | hsa:6794   | STK11       | IPI00219072 | 13.231462 |
| hsa:150094 | SNF1LK    | IPI00025679 | hsa:9891   | NUAK1       | IPI00028566 | 13.231462 |
| hsa:23387  | KIAA0999  | IPI00032263 | hsa:9891   | NUAK1       | IPI00028566 | 13.231462 |
| hsa:5520   | PPP2R2A   | IPI00332511 | hsa:5518   | PPP2R1A     | IPI00554737 | 13.231462 |
| hsa:9020   | MAP3K14   | IPI00016099 | hsa:23223  | RRP12       | IPI00101186 | 13.231462 |
| hsa:3611   | ILK       | IPI00013219 | hsa:54919  | HEATR2      | IPI00242630 | 13.231462 |
| hsa:10783  | NEK6      | IPI00550738 | hsa:54919  | HEATR2      | IPI00242630 | 13.231462 |

|            |          |             |           |         |             |           |
|------------|----------|-------------|-----------|---------|-------------|-----------|
| hsa:23043  | TNIK     | IPI00145805 | hsa:5518  | PPP2R1A | IPI00554737 | 13.231462 |
| hsa:3093   | HIP2     | IPI00021370 | hsa:9641  | IKBKE   | IPI00029045 | 13.231462 |
| hsa:3093   | HIP2     | IPI00021370 | hsa:25778 | RIPK5   | IPI00465346 | 13.231462 |
| hsa:1019   | CDK4     | IPI00007811 | hsa:64210 | MMS19   | IPI00180322 | 13.231462 |
| hsa:7424   | VEGFC    | IPI00028076 | hsa:2324  | FLT4    | IPI00337568 | 13.168143 |
| hsa:2277   | FIGF     | IPI00004653 | hsa:2324  | FLT4    | IPI00337568 | 13.168143 |
| hsa:7424   | VEGFC    | IPI00028076 | hsa:3791  | KDR     | IPI00021396 | 13.168143 |
| hsa:2277   | FIGF     | IPI00004653 | hsa:3791  | KDR     | IPI00021396 | 13.168143 |
| hsa:4790   | NFKB1    | IPI00788987 | hsa:5971  | RELB    | IPI00221034 | 13.109432 |
| hsa:4790   | NFKB1    | IPI00788987 | hsa:5966  | REL     | IPI00029773 | 13.109432 |
| hsa:4851   | NOTCH1   | IPI00412982 | hsa:3516  | RBPJ    | IPI00030177 | 13.109432 |
| hsa:602    | BCL3     | IPI00791379 | hsa:4791  | NFKB2   | IPI00845373 | 13.109432 |
| hsa:4791   | NFKB2    | IPI00845373 | hsa:5966  | REL     | IPI00029773 | 13.109432 |
| hsa:4791   | NFKB2    | IPI00845373 | hsa:5971  | RELB    | IPI00221034 | 13.109432 |
| hsa:4792   | NFKBIA   | IPI00018330 | hsa:5966  | REL     | IPI00029773 | 13.109432 |
| hsa:4792   | NFKBIA   | IPI00018330 | hsa:5971  | RELB    | IPI00221034 | 13.109432 |
| hsa:4851   | NOTCH1   | IPI00412982 | hsa:5966  | REL     | IPI00029773 | 13.109432 |
| hsa:4794   | NFKBIE   | IPI00442458 | hsa:5971  | RELB    | IPI00221034 | 13.109432 |
| hsa:55075  | UACA     | IPI00173359 | hsa:5966  | REL     | IPI00029773 | 13.109432 |
| hsa:4794   | NFKBIE   | IPI00442458 | hsa:5970  | RELA    | IPI00386448 | 13.109432 |
| hsa:4792   | NFKBIA   | IPI00018330 | hsa:5970  | RELA    | IPI00386448 | 13.109432 |
| hsa:4793   | NFKBIB   | IPI00161119 | hsa:5970  | RELA    | IPI00386448 | 13.109432 |
| hsa:4791   | NFKB2    | IPI00845373 | hsa:5970  | RELA    | IPI00386448 | 13.109432 |
| hsa:4790   | NFKB1    | IPI00788987 | hsa:5970  | RELA    | IPI00386448 | 13.109432 |
| hsa:7159   | TP53BP2  | IPI00337588 | hsa:5970  | RELA    | IPI00386448 | 13.109432 |
| hsa:10848  | PPP1R13L | IPI00439948 | hsa:5970  | RELA    | IPI00386448 | 13.109432 |
| hsa:136319 | MTPN     | IPI00179589 | hsa:5970  | RELA    | IPI00386448 | 13.109432 |
| hsa:4851   | NOTCH1   | IPI00412982 | hsa:5970  | RELA    | IPI00386448 | 13.109432 |
| hsa:4793   | NFKBIB   | IPI00161119 | hsa:4790  | NFKB1   | IPI00788987 | 13.109432 |
| hsa:4794   | NFKBIE   | IPI00442458 | hsa:4790  | NFKB1   | IPI00788987 | 13.109432 |
| hsa:4792   | NFKBIA   | IPI00018330 | hsa:4790  | NFKB1   | IPI00788987 | 13.109432 |
| hsa:64332  | NFKBIZ   | IPI00027741 | hsa:4790  | NFKB1   | IPI00788987 | 13.109432 |
| hsa:136319 | MTPN     | IPI00179589 | hsa:4790  | NFKB1   | IPI00788987 | 13.109432 |
| hsa:602    | BCL3     | IPI00791379 | hsa:4790  | NFKB1   | IPI00788987 | 13.109432 |
| hsa:4793   | NFKBIB   | IPI00161119 | hsa:4791  | NFKB2   | IPI00845373 | 13.109432 |
| hsa:4792   | NFKBIA   | IPI00018330 | hsa:4791  | NFKB2   | IPI00845373 | 13.109432 |
| hsa:4794   | NFKBIE   | IPI00442458 | hsa:4791  | NFKB2   | IPI00845373 | 13.109432 |
| hsa:4793   | NFKBIB   | IPI00161119 | hsa:5966  | REL     | IPI00029773 | 13.109432 |
| hsa:4794   | NFKBIE   | IPI00442458 | hsa:5966  | REL     | IPI00029773 | 13.109432 |
| hsa:4855   | NOTCH4   | IPI00829649 | hsa:3516  | RBPJ    | IPI00030177 | 13.109432 |
| hsa:4854   | NOTCH3   | IPI00029819 | hsa:3516  | RBPJ    | IPI00030177 | 13.109432 |
| hsa:4853   | NOTCH2   | IPI00297655 | hsa:3516  | RBPJ    | IPI00030177 | 13.109432 |
| hsa:57531  | HACE1    | IPI00337371 | hsa:5362  | PLXNA2  | IPI00719621 | 13.109432 |
| hsa:3385   | ICAM3    | IPI00031620 | hsa:10332 | CLEC4M  | IPI00385903 | 12.878222 |
| hsa:3385   | ICAM3    | IPI00031620 | hsa:30835 | CD209   | IPI00028136 | 12.878222 |
| hsa:634    | CEACAM1  | IPI00009938 | hsa:10332 | CLEC4M  | IPI00385903 | 12.878222 |
| hsa:387    | RHOA     | IPI00478231 | hsa:5586  | PKN2    | IPI00002804 | 12.71156  |
| hsa:387    | RHOA     | IPI00478231 | hsa:5585  | PKN1    | IPI00002803 | 12.71156  |
| hsa:4214   | MAP3K1   | IPI00855985 | hsa:3551  | IKBKB   | IPI00024709 | 12.677487 |
| hsa:10256  | CNKSR1   | IPI00299824 | hsa:389   | RHOC    | IPI00027434 | 12.661185 |
| hsa:10256  | CNKSR1   | IPI00299824 | hsa:399   | RHOH    | IPI00018882 | 12.661185 |
| hsa:22866  | CNKSR2   | IPI00435208 | hsa:5898  | RALA    | IPI00217519 | 12.661185 |
| hsa:10256  | CNKSR1   | IPI00299824 | hsa:387   | RHOA    | IPI00478231 | 12.661185 |
| hsa:58500  | ZNF250   | IPI00643611 | hsa:373   | TRIM23  | IPI00003328 | 12.406305 |
| hsa:58500  | ZNF250   | IPI00643611 | hsa:373   | TRIM23  | IPI00003328 | 12.406305 |
| hsa:5335   | PLCG1    | IPI00016736 | hsa:28964 | GIT1    | IPI00384861 | 12.338863 |
| hsa:8874   | ARHGEF7  | IPI00449906 | hsa:28964 | GIT1    | IPI00384861 | 12.338863 |
| hsa:9459   | ARHGEF6  | IPI00014256 | hsa:28964 | GIT1    | IPI00384861 | 12.338863 |
| hsa:8874   | ARHGEF7  | IPI00449906 | hsa:9815  | GIT2    | IPI00238218 | 12.338863 |
| hsa:8878   | SQSTM1   | IPI00784104 | hsa:3932  | LCK     | IPI00394952 | 12.172595 |



|           |              |             |           |              |             |           |
|-----------|--------------|-------------|-----------|--------------|-------------|-----------|
| hsa:5781  | PTPN11       | IPI00658023 | hsa:392   | ARHGAP1      | IPI00020567 | 12.01698  |
| hsa:53358 | SHC3         | IPI00409679 | hsa:9743  | RICS         | IPI00334294 | 12.01698  |
| hsa:5295  | PIK3R1       | IPI00021448 | hsa:9743  | RICS         | IPI00334294 | 12.01698  |
| hsa:5295  | PIK3R1       | IPI00021448 | hsa:392   | ARHGAP1      | IPI00020567 | 12.01698  |
| hsa:998   | CDC42        | IPI00007189 | hsa:8476  | CDC42BPA     | IPI00640468 | 11.600279 |
| hsa:23433 | RHOQ         | IPI00012511 | hsa:8476  | CDC42BPA     | IPI00640468 | 11.600279 |
| hsa:5788  | PTPRC        | IPI00844079 | hsa:919   | CD247        | IPI00218634 | 11.596806 |
| hsa:5774  | PTPN3        | IPI00289649 | hsa:919   | CD247        | IPI00218634 | 11.596806 |
| hsa:26191 | PTPN22       | IPI00219138 | hsa:919   | CD247        | IPI00218634 | 11.596806 |
| hsa:4591  | TRIM37       | IPI00016619 | hsa:55872 | PBK          | IPI00306708 | 11.409739 |
| hsa:7187  | TRAF3        | IPI00297473 | hsa:9020  | MAP3K14      | IPI00016099 | 11.409739 |
| hsa:7188  | TRAF5        | IPI00005760 | hsa:9020  | MAP3K14      | IPI00016099 | 11.409739 |
| hsa:7188  | TRAF5        | IPI00005760 | hsa:8767  | RIPK2        | IPI00021917 | 11.409739 |
| hsa:7187  | TRAF3        | IPI00297473 | hsa:6714  | SRC          | IPI00641230 | 11.409739 |
| hsa:7187  | TRAF3        | IPI00297473 | hsa:5604  | MAP2K1       | IPI00219604 | 11.409739 |
| hsa:7188  | TRAF5        | IPI00005760 | hsa:4217  | MAP3K5       | IPI00412433 | 11.409739 |
| hsa:9618  | TRAF4        | IPI00162088 | hsa:4216  | MAP3K4       | IPI00386260 | 11.409739 |
| hsa:9618  | TRAF4        | IPI00162088 | hsa:6198  | RPS6KB1      | IPI00216132 | 11.409739 |
| hsa:4591  | TRIM37       | IPI00016619 | hsa:55872 | PBK          | IPI00306708 | 11.409739 |
| hsa:5781  | PTPN11       | IPI00658023 | hsa:9021  | SOCS3        | IPI00297349 | 11.361508 |
| hsa:5781  | PTPN11       | IPI00658023 | hsa:5295  | PIK3R1       | IPI00021448 | 11.361508 |
| hsa:5781  | PTPN11       | IPI00658023 | hsa:3635  | INPP5D646743 | IPI00329213 | 11.361508 |
| hsa:5771  | PTPN2        | IPI00219695 | hsa:6464  | SHC1         | IPI00645103 | 11.361508 |
| hsa:5771  | PTPN2        | IPI00219695 | hsa:6777  | STAT5B       | IPI00103415 | 11.361508 |
| hsa:5771  | PTPN2        | IPI00219695 | hsa:6776  | STAT5A       | IPI00030783 | 11.361508 |
| hsa:5777  | PTPN6        | IPI00218604 | hsa:29760 | BLNK         | IPI00002434 | 11.361508 |
| hsa:5777  | PTPN6        | IPI00218604 | hsa:3937  | LCP2         | IPI00297169 | 11.361508 |
| hsa:5770  | PTPN1        | IPI00297261 | hsa:6777  | STAT5B       | IPI00103415 | 11.361508 |
| hsa:5770  | PTPN1        | IPI00297261 | hsa:6776  | STAT5A       | IPI00030783 | 11.361508 |
| hsa:11156 | PTP4A3       | IPI00289328 | hsa:6772  | STAT1        | IPI00030781 | 11.361508 |
| hsa:5771  | PTPN2        | IPI00219695 | hsa:6774  | STAT3        | IPI00784414 | 11.361508 |
| hsa:5771  | PTPN2        | IPI00219695 | hsa:6772  | STAT1        | IPI00030781 | 11.361508 |
| hsa:5782  | PTPN12       | IPI00289082 | hsa:6464  | SHC1         | IPI00645103 | 11.361508 |
| hsa:5777  | PTPN6        | IPI00218604 | hsa:5295  | PIK3R1       | IPI00021448 | 11.361508 |
| hsa:29760 | BLNK         | IPI00002434 | hsa:5336  | PLCG2        | IPI00329185 | 11.089956 |
| hsa:3937  | LCP2         | IPI00297169 | hsa:5336  | PLCG2        | IPI00329185 | 11.089956 |
| hsa:3635  | INPP5D646743 | IPI00329213 | hsa:5335  | PLCG1        | IPI00016736 | 11.089956 |
| hsa:29760 | BLNK         | IPI00002434 | hsa:5335  | PLCG1        | IPI00016736 | 11.089956 |
| hsa:9047  | SH2D2A       | IPI00099806 | hsa:5335  | PLCG1        | IPI00016736 | 11.089956 |
| hsa:30837 | SOCS7        | IPI00022329 | hsa:5335  | PLCG1        | IPI00016736 | 11.089956 |
| hsa:3937  | LCP2         | IPI00297169 | hsa:5335  | PLCG1        | IPI00016736 | 11.089956 |
| hsa:6461  | SHB          | IPI00604688 | hsa:5335  | PLCG1        | IPI00016736 | 11.089956 |
| hsa:4140  | MARK3        | IPI00183118 | hsa:3551  | IKBKB        | IPI00024709 | 11.026218 |
| hsa:7186  | TRAF2        | IPI00030278 | hsa:3551  | IKBKB        | IPI00024709 | 10.955307 |
| hsa:7186  | TRAF2        | IPI00030278 | hsa:1147  | CHUK         | IPI00005104 | 10.955307 |
| hsa:3055  | HCK          | IPI00646510 | hsa:23616 | SH3BP157026  | IPI00456744 | 10.944035 |
| hsa:6714  | SRC          | IPI00641230 | hsa:9743  | RICS         | IPI00334294 | 10.944035 |
| hsa:6714  | SRC          | IPI00641230 | hsa:23616 | SH3BP157026  | IPI00456744 | 10.944035 |
| hsa:6714  | SRC          | IPI00641230 | hsa:392   | ARHGAP1      | IPI00020567 | 10.944035 |
| hsa:5335  | PLCG1        | IPI00016736 | hsa:9743  | RICS         | IPI00334294 | 10.944035 |
| hsa:2534  | FYN          | IPI00219012 | hsa:9743  | RICS         | IPI00334294 | 10.944035 |
| hsa:2885  | GRB2         | IPI00021327 | hsa:4952  | OCR1         | IPI00873093 | 10.944035 |
| hsa:5921  | RASA1        | IPI00026262 | hsa:392   | ARHGAP1      | IPI00020567 | 10.944035 |
| hsa:1398  | CRK          | IPI00004838 | hsa:9743  | RICS         | IPI00334294 | 10.944035 |
| hsa:1398  | CRK          | IPI00004838 | hsa:23616 | SH3BP157026  | IPI00456744 | 10.944035 |
| hsa:1399  | CRKL         | IPI00004839 | hsa:9743  | RICS         | IPI00334294 | 10.944035 |
| hsa:10750 | GRAP         | IPI00013864 | hsa:9743  | RICS         | IPI00334294 | 10.944035 |
| hsa:4690  | NCK1         | IPI00028065 | hsa:9743  | RICS         | IPI00334294 | 10.944035 |
| hsa:5781  | PTPN11       | IPI00658023 | hsa:5335  | PLCG1        | IPI00016736 | 10.826429 |
| hsa:5295  | PIK3R1       | IPI00021448 | hsa:5290  | PIK3CA       | IPI00031386 | 10.574942 |

|           |           |             |            |           |             |           |
|-----------|-----------|-------------|------------|-----------|-------------|-----------|
| hsa:868   | CBLB      | IPI00292856 | hsa:4734   | NEDD4     | IPI00009322 | 10.574942 |
| hsa:23624 | CBLC      | IPI00008459 | hsa:83737  | ITCH      | IPI00061780 | 10.574942 |
| hsa:8503  | PIK3R3    | IPI00513745 | hsa:5290   | PIK3CA    | IPI00031386 | 10.574942 |
| hsa:9306  | SOCS6     | IPI00297351 | hsa:64750  | SMURF2    | IPI00329664 | 10.574942 |
| hsa:5781  | PTPN11    | IPI00658023 | hsa:6464   | SHC1      | IPI00645103 | 10.487546 |
| hsa:5777  | PTPN6     | IPI00218604 | hsa:6464   | SHC1      | IPI00645103 | 10.487546 |
| hsa:4804  | NGFR      | IPI00027436 | hsa:8717   | TRADD     | IPI00018744 | 10.293165 |
| hsa:355   | FAS       | IPI00744894 | hsa:288    | ANK3      | IPI00472779 | 10.293165 |
| hsa:355   | FAS       | IPI00744894 | hsa:8717   | TRADD     | IPI00018744 | 10.293165 |
| hsa:355   | FAS       | IPI00744894 | hsa:8772   | FADD      | IPI00011919 | 10.293165 |
| hsa:7132  | TNFRSF1A  | IPI00018880 | hsa:8717   | TRADD     | IPI00018744 | 10.293165 |
| hsa:8797  | TNFRSF10A | IPI00021975 | hsa:8772   | FADD      | IPI00011919 | 10.293165 |
| hsa:8797  | TNFRSF10A | IPI00021975 | hsa:8717   | TRADD     | IPI00018744 | 10.293165 |
| hsa:10913 | EDAR      | IPI00007051 | hsa:128178 | EDARADD   | IPI00103484 | 10.293165 |
| hsa:7132  | TNFRSF1A  | IPI00018880 | hsa:8772   | FADD      | IPI00011919 | 10.293165 |
| hsa:8718  | TNFRSF25  | IPI00003999 | hsa:7132   | TNFRSF1A  | IPI00018880 | 10.293165 |
| hsa:8793  | TNFRSF10D | IPI00294516 | hsa:8797   | TNFRSF10A | IPI00021975 | 10.293165 |
| hsa:8795  | TNFRSF10B | IPI00296379 | hsa:8772   | FADD      | IPI00011919 | 10.293165 |
| hsa:60401 | EDA2R     | IPI00029116 | hsa:8772   | FADD      | IPI00011919 | 10.293165 |
| hsa:8718  | TNFRSF25  | IPI00003999 | hsa:8717   | TRADD     | IPI00018744 | 10.293165 |
| hsa:27242 | TNFRSF21  | IPI00004413 | hsa:8717   | TRADD     | IPI00018744 | 10.293165 |
| hsa:8795  | TNFRSF10B | IPI00296379 | hsa:8717   | TRADD     | IPI00018744 | 10.293165 |
| hsa:8793  | TNFRSF10D | IPI00294516 | hsa:8795   | TNFRSF10B | IPI00296379 | 10.293165 |
| hsa:5339  | PLEC1     | IPI00014898 | hsa:6708   | SPTA1     | IPI00220741 | 10.282386 |
| hsa:5339  | PLEC1     | IPI00014898 | hsa:6709   | SPTAN1    | IPI00844215 | 10.282386 |
| hsa:6710  | SPTB      | IPI00216704 | hsa:6709   | SPTAN1    | IPI00844215 | 10.282386 |
| hsa:6710  | SPTB      | IPI00216704 | hsa:6708   | SPTA1     | IPI00220741 | 10.282386 |
| hsa:4294  | MAP3K10   | IPI00295401 | hsa:22920  | KIFAP3    | IPI00647465 | 10.199252 |
| hsa:50488 | MINK1     | IPI00166680 | hsa:22920  | KIFAP3    | IPI00647465 | 10.199252 |
| hsa:5791  | PTPRE     | IPI00334825 | hsa:2885   | GRB2      | IPI00021327 | 10.167614 |
| hsa:5782  | PTPN12    | IPI00289082 | hsa:2885   | GRB2      | IPI00021327 | 10.167614 |
| hsa:26191 | PTPN22    | IPI00219138 | hsa:2885   | GRB2      | IPI00021327 | 10.167614 |
| hsa:5770  | PTPN1     | IPI00297261 | hsa:2885   | GRB2      | IPI00021327 | 10.167614 |
| hsa:5786  | PTPRA     | IPI00221067 | hsa:2885   | GRB2      | IPI00021327 | 10.167614 |
| hsa:64218 | SEMA4A    | IPI00149097 | hsa:23129  | PLXND1    | IPI00412492 | 10.109938 |
| hsa:64218 | SEMA4A    | IPI00149097 | hsa:5365   | PLXNB3    | IPI00155729 | 10.109938 |
| hsa:64218 | SEMA4A    | IPI00149097 | hsa:23654  | PLXNB2    | IPI00853369 | 10.109938 |
| hsa:10509 | SEMA4B    | IPI00513964 | hsa:5364   | PLXNB1    | IPI00455329 | 10.109938 |
| hsa:80031 | SEMA6D    | IPI00332846 | hsa:5361   | PLXNA1    | IPI00552671 | 10.109938 |
| hsa:64218 | SEMA4A    | IPI00149097 | hsa:5364   | PLXNB1    | IPI00455329 | 10.109938 |
| hsa:3339  | HSPG2     | IPI00024284 | hsa:6678   | SPARC     | IPI00014572 | 9.960019  |
| hsa:867   | CBL       | IPI00027269 | hsa:26578  | OSTF1     | IPI00414836 | 9.910106  |
| hsa:867   | CBL       | IPI00027269 | hsa:50807  | DDEF1     | IPI00410303 | 9.910106  |
| hsa:2017  | CTTN      | IPI00029601 | hsa:23779  | ARHGAP8   | IPI00868745 | 9.87109   |
| hsa:4867  | NPHP1     | IPI00028739 | hsa:2317   | FLNB      | IPI00289334 | 9.87109   |
| hsa:4867  | NPHP1     | IPI00028739 | hsa:2316   | FLNA      | IPI00333541 | 9.87109   |
| hsa:1742  | DLG4      | IPI00619928 | hsa:9743   | RICS      | IPI00334294 | 9.87109   |
| hsa:2534  | FYN       | IPI00219012 | hsa:1266   | CNN3      | IPI00216682 | 9.87109   |
| hsa:4294  | MAP3K10   | IPI00295401 | hsa:29127  | RACGAP1   | IPI00152946 | 9.87109   |
| hsa:9322  | TRIP10    | IPI00168849 | hsa:55114  | ARHGAP17  | IPI00064767 | 9.87109   |
| hsa:51678 | MPP6      | IPI00303280 | hsa:93663  | ARHGAP18  | IPI00296353 | 9.87109   |
| hsa:57630 | SH3RF1    | IPI00217138 | hsa:29127  | RACGAP1   | IPI00152946 | 9.87109   |
| hsa:4867  | NPHP1     | IPI00028739 | hsa:2318   | FLNC      | IPI00178352 | 9.87109   |
| hsa:2534  | FYN       | IPI00219012 | hsa:1264   | CNN1      | IPI00021264 | 9.87109   |
| hsa:9564  | BCAR1     | IPI00872386 | hsa:9743   | RICS      | IPI00334294 | 9.87109   |
| hsa:6453  | ITSN1     | IPI00304740 | hsa:57514  | CDGAP     | IPI00297288 | 9.87109   |
| hsa:7082  | TJP1      | IPI00216219 | hsa:2316   | FLNA      | IPI00333541 | 9.87109   |
| hsa:6455  | SH3GL1    | IPI00019169 | hsa:23779  | ARHGAP8   | IPI00868745 | 9.87109   |
| hsa:5781  | PTPN11    | IPI00658023 | hsa:613    | BCR       | IPI00004497 | 9.763104  |
| hsa:6464  | SHC1      | IPI00645103 | hsa:613    | BCR       | IPI00004497 | 9.763104  |

|           |              |             |           |              |             |          |
|-----------|--------------|-------------|-----------|--------------|-------------|----------|
| hsa:5777  | PTPN6        | IPI00218604 | hsa:613   | BCR          | IPI00004497 | 9.763104 |
| hsa:390   | RND3         | IPI00001437 | hsa:6093  | ROCK1        | IPI00022542 | 9.754257 |
| hsa:389   | RHOC         | IPI00027434 | hsa:6093  | ROCK1        | IPI00022542 | 9.754257 |
| hsa:387   | RHOA         | IPI00478231 | hsa:6093  | ROCK1        | IPI00022542 | 9.754257 |
| hsa:4356  | MPP3         | IPI00419337 | hsa:11031 | RAB31        | IPI00014376 | 9.720002 |
| hsa:9459  | ARHGEF6      | IPI00014256 | hsa:29780 | PARVB        | IPI00043083 | 9.673669 |
| hsa:7204  | TRIO         | IPI00442035 | hsa:2316  | FLNA         | IPI00333541 | 9.673669 |
| hsa:3611  | ILK          | IPI00013219 | hsa:55898 | UNC45A       | IPI00072534 | 9.647941 |
| hsa:4225  | MEP1B        | IPI00178015 | hsa:5580  | PRKCD        | IPI00329236 | 9.620916 |
| hsa:4225  | MEP1B        | IPI00178015 | hsa:5566  | PRKACA730418 | IPI00396630 | 9.620916 |
| hsa:5781  | PTPN11       | IPI00658023 | hsa:1600  | DAB1         | IPI00514638 | 9.613584 |
| hsa:6714  | SRC          | IPI00641230 | hsa:1600  | DAB1         | IPI00514638 | 9.613584 |
| hsa:6714  | SRC          | IPI00641230 | hsa:1601  | DAB2         | IPI00179438 | 9.613584 |
| hsa:3636  | INPPL1       | IPI00016932 | hsa:6464  | SHC1         | IPI00645103 | 9.613584 |
| hsa:25    | ABL129892    | IPI00216969 | hsa:322   | APBB1        | IPI00783577 | 9.613584 |
| hsa:2885  | GRB2         | IPI00021327 | hsa:1601  | DAB2         | IPI00179438 | 9.613584 |
| hsa:1445  | CSK          | IPI00013212 | hsa:1601  | DAB2         | IPI00179438 | 9.613584 |
| hsa:2268  | FGR          | IPI00016871 | hsa:1601  | DAB2         | IPI00179438 | 9.613584 |
| hsa:3635  | INPP5D646743 | IPI00329213 | hsa:6464  | SHC1         | IPI00645103 | 9.613584 |
| hsa:3937  | LCP2         | IPI00297169 | hsa:6464  | SHC1         | IPI00645103 | 9.613584 |
| hsa:5295  | PIK3R1       | IPI00021448 | hsa:6464  | SHC1         | IPI00645103 | 9.613584 |
| hsa:1399  | CRKL         | IPI00004839 | hsa:1600  | DAB1         | IPI00514638 | 9.613584 |
| hsa:1398  | CRK          | IPI00004838 | hsa:1600  | DAB1         | IPI00514638 | 9.613584 |
| hsa:5335  | PLCG1        | IPI00016736 | hsa:1600  | DAB1         | IPI00514638 | 9.613584 |
| hsa:4851  | NOTCH1       | IPI00412982 | hsa:4790  | NFKB1        | IPI00788987 | 9.510765 |
| hsa:6640  | SNTA1        | IPI00164528 | hsa:1756  | DMD          | IPI00006091 | 9.476247 |
| hsa:54221 | SNTG2        | IPI00004445 | hsa:1756  | DMD          | IPI00006091 | 9.476247 |
| hsa:54212 | SNTG1        | IPI00071897 | hsa:1756  | DMD          | IPI00006091 | 9.476247 |
| hsa:93664 | CADPS2       | IPI00384264 | hsa:1756  | DMD          | IPI00006091 | 9.476247 |
| hsa:8618  | CADPS        | IPI00297412 | hsa:1756  | DMD          | IPI00006091 | 9.476247 |
| hsa:6645  | SNTB2        | IPI00009505 | hsa:1756  | DMD          | IPI00006091 | 9.476247 |
| hsa:6641  | SNTB1        | IPI00026059 | hsa:1756  | DMD          | IPI00006091 | 9.476247 |
| hsa:90102 | PHLDB2       | IPI00410259 | hsa:2318  | FLNC         | IPI00178352 | 9.476247 |
| hsa:6640  | SNTA1        | IPI00164528 | hsa:7402  | UTRN         | IPI00009329 | 9.476247 |
| hsa:6645  | SNTB2        | IPI00009505 | hsa:7402  | UTRN         | IPI00009329 | 9.476247 |
| hsa:6641  | SNTB1        | IPI00026059 | hsa:7402  | UTRN         | IPI00009329 | 9.476247 |
| hsa:10019 | SH2B3        | IPI00010821 | hsa:2316  | FLNA         | IPI00333541 | 9.476247 |
| hsa:23612 | PHLDA3       | IPI00329599 | hsa:10982 | MAPRE2       | IPI00003420 | 9.476247 |
| hsa:83478 | ARHGAP24     | IPI00166301 | hsa:2316  | FLNA         | IPI00333541 | 9.476247 |
| hsa:1398  | CRK          | IPI00004838 | hsa:6777  | STAT5B       | IPI00103415 | 9.422838 |
| hsa:1398  | CRK          | IPI00004838 | hsa:6776  | STAT5A       | IPI00030783 | 9.422838 |
| hsa:1399  | CRKL         | IPI00004839 | hsa:6777  | STAT5B       | IPI00103415 | 9.422838 |
| hsa:1399  | CRKL         | IPI00004839 | hsa:6776  | STAT5A       | IPI00030783 | 9.422838 |
| hsa:3691  | ITGB4        | IPI00027422 | hsa:2064  | ERBB2        | IPI00300384 | 9.254424 |
| hsa:3371  | TNC          | IPI00031008 | hsa:1956  | EGFR         | IPI00018274 | 9.254424 |
| hsa:7006  | TEC          | IPI00000878 | hsa:1796  | DOK1         | IPI00015287 | 9.251111 |
| hsa:2887  | GRB10        | IPI00012752 | hsa:4734  | NEDD4        | IPI00009322 | 9.235907 |
| hsa:867   | CBL          | IPI00027269 | hsa:3791  | KDR          | IPI00021396 | 9.204496 |
| hsa:867   | CBL          | IPI00027269 | hsa:8999  | CDKL2        | IPI00022541 | 9.204496 |
| hsa:867   | CBL          | IPI00027269 | hsa:2051  | EPHB6        | IPI00005222 | 9.204496 |
| hsa:867   | CBL          | IPI00027269 | hsa:2185  | PTK2B        | IPI00029702 | 9.204496 |
| hsa:867   | CBL          | IPI00027269 | hsa:4058  | LTK          | IPI00021365 | 9.204496 |
| hsa:867   | CBL          | IPI00027269 | hsa:3643  | INSR         | IPI00220325 | 9.204496 |
| hsa:867   | CBL          | IPI00027269 | hsa:5979  | RET          | IPI00013983 | 9.204496 |
| hsa:867   | CBL          | IPI00027269 | hsa:4233  | MET          | IPI00029273 | 9.204496 |
| hsa:867   | CBL          | IPI00027269 | hsa:1956  | EGFR         | IPI00018274 | 9.204496 |
| hsa:867   | CBL          | IPI00027269 | hsa:5578  | PRKCA        | IPI00385449 | 9.204496 |
| hsa:867   | CBL          | IPI00027269 | hsa:558   | AXL          | IPI00397361 | 9.204496 |
| hsa:867   | CBL          | IPI00027269 | hsa:1436  | CSF1R        | IPI00011218 | 9.204496 |
| hsa:867   | CBL          | IPI00027269 | hsa:3815  | KIT          | IPI00022296 | 9.204496 |

|           |         |             |           |            |             |          |
|-----------|---------|-------------|-----------|------------|-------------|----------|
| hsa:867   | CBL     | IPI00027269 | hsa:5159  | PDGFRB     | IPI00015902 | 9.204496 |
| hsa:867   | CBL     | IPI00027269 | hsa:1969  | EPHA2      | IPI00021267 | 9.204496 |
| hsa:6714  | SRC     | IPI00641230 | hsa:2909  | GRLF1      | IPI00334715 | 9.195643 |
| hsa:156   | ADRBK1  | IPI00012497 | hsa:9815  | GIT2       | IPI00238218 | 9.174195 |
| hsa:156   | ADRBK1  | IPI00012497 | hsa:28964 | GIT1       | IPI00384861 | 9.174195 |
| hsa:157   | ADRBK2  | IPI00019926 | hsa:28964 | GIT1       | IPI00384861 | 9.174195 |
| hsa:7409  | VAV1    | IPI00011696 | hsa:29127 | RACGAP1    | IPI00152946 | 9.171845 |
| hsa:4690  | NCK1    | IPI00028065 | hsa:1124  | CHN2       | IPI00428671 | 9.171845 |
| hsa:3718  | JAK3    | IPI00002773 | hsa:6774  | STAT3      | IPI00784414 | 9.046826 |
| hsa:6850  | SYK     | IPI00018597 | hsa:6774  | STAT3      | IPI00784414 | 9.046826 |
| hsa:2242  | FES     | IPI00294344 | hsa:6774  | STAT3      | IPI00784414 | 9.046826 |
| hsa:2241  | FER     | IPI00029263 | hsa:6774  | STAT3      | IPI00784414 | 9.046826 |
| hsa:3717  | JAK2    | IPI00031016 | hsa:6774  | STAT3      | IPI00784414 | 9.046826 |
| hsa:3716  | JAK1    | IPI00443765 | hsa:6774  | STAT3      | IPI00784414 | 9.046826 |
| hsa:7297  | TYK2    | IPI00022353 | hsa:6772  | STAT1      | IPI00030781 | 9.046826 |
| hsa:3716  | JAK1    | IPI00443765 | hsa:6778  | STAT6      | IPI00030782 | 9.046825 |
| hsa:3716  | JAK1    | IPI00443765 | hsa:6776  | STAT5A     | IPI00030783 | 9.046825 |
| hsa:3716  | JAK1    | IPI00443765 | hsa:6773  | STAT2      | IPI00004312 | 9.046825 |
| hsa:3716  | JAK1    | IPI00443765 | hsa:6772  | STAT1      | IPI00030781 | 9.046825 |
| hsa:3717  | JAK2    | IPI00031016 | hsa:6777  | STAT5B     | IPI00103415 | 9.046825 |
| hsa:3717  | JAK2    | IPI00031016 | hsa:6773  | STAT2      | IPI00004312 | 9.046825 |
| hsa:3717  | JAK2    | IPI00031016 | hsa:6776  | STAT5A     | IPI00030783 | 9.046825 |
| hsa:3717  | JAK2    | IPI00031016 | hsa:6772  | STAT1      | IPI00030781 | 9.046825 |
| hsa:6850  | SYK     | IPI00018597 | hsa:6772  | STAT1      | IPI00030781 | 9.046825 |
| hsa:6850  | SYK     | IPI00018597 | hsa:6776  | STAT5A     | IPI00030783 | 9.046825 |
| hsa:3718  | JAK3    | IPI00002773 | hsa:6776  | STAT5A     | IPI00030783 | 9.046825 |
| hsa:7297  | TYK2    | IPI00022353 | hsa:6773  | STAT2      | IPI00004312 | 9.046825 |
| hsa:3911  | LAMA5   | IPI00783665 | hsa:4059  | BCAM       | IPI00002406 | 8.986096 |
| hsa:80781 | COL18A1 | IPI00022822 | hsa:3791  | KDR        | IPI00021396 | 8.986096 |
| hsa:1297  | COL9A1  | IPI00874229 | hsa:4099  | MAG        | IPI00026237 | 8.986096 |
| hsa:6462  | SHBG    | IPI00023019 | hsa:6405  | SEMA3F     | IPI00298003 | 8.986096 |
| hsa:5788  | PTPRC   | IPI00844079 | hsa:8631  | SKAP1      | IPI00289536 | 8.973719 |
| hsa:5786  | PTPRA   | IPI00221067 | hsa:9564  | BCAR1      | IPI00872386 | 8.973719 |
| hsa:5770  | PTPN1   | IPI00297261 | hsa:9564  | BCAR1      | IPI00872386 | 8.973719 |
| hsa:5782  | PTPN12  | IPI00289082 | hsa:10278 | EFS        | IPI00011652 | 8.973719 |
| hsa:5782  | PTPN12  | IPI00289082 | hsa:9051  | PSTPIP1    | IPI00022606 | 8.973719 |
| hsa:5782  | PTPN12  | IPI00289082 | hsa:4739  | NEDD9      | IPI00031407 | 8.973719 |
| hsa:5782  | PTPN12  | IPI00289082 | hsa:9564  | BCAR1      | IPI00872386 | 8.973719 |
| hsa:26469 | PTPN18  | IPI00152019 | hsa:9051  | PSTPIP1    | IPI00022606 | 8.973719 |
| hsa:5770  | PTPN1   | IPI00297261 | hsa:9051  | PSTPIP1    | IPI00022606 | 8.973719 |
| hsa:5794  | PTPRH   | IPI00760988 | hsa:9564  | BCAR1      | IPI00872386 | 8.973719 |
| hsa:6279  | S100A8  | IPI00007047 | hsa:79705 | LRRK1      | IPI00747813 | 8.968848 |
| hsa:9542  | NRG2    | IPI00477848 | hsa:2066  | ERBB4      | IPI00016371 | 8.950617 |
| hsa:3554  | IL1R1   | IPI00027508 | hsa:3656  | IRAK2      | IPI00304986 | 8.821589 |
| hsa:59307 | SIGIRR  | IPI00029155 | hsa:3654  | IRAK1      | IPI00293652 | 8.821589 |
| hsa:1019  | CDK4    | IPI00007811 | hsa:7917  | BAT3       | IPI00465128 | 8.820974 |
| hsa:7046  | TGFBR1  | IPI00005733 | hsa:6233  | RPS27A7316 | IPI00654754 | 8.820974 |
| hsa:7046  | TGFBR1  | IPI00005733 | hsa:3551  | IKBKB      | IPI00024709 | 8.820974 |
| hsa:7046  | TGFBR1  | IPI00005733 | hsa:1147  | CHUK       | IPI00005104 | 8.820974 |
| hsa:7046  | TGFBR1  | IPI00005733 | hsa:10537 | UBD        | IPI00007405 | 8.820974 |
| hsa:7046  | TGFBR1  | IPI00005733 | hsa:7314  | UBB        | unknown     | 8.820974 |
| hsa:7046  | TGFBR1  | IPI00005733 | hsa:7311  | UBA52      | IPI00385127 | 8.820974 |
| hsa:4233  | MET     | IPI00029273 | hsa:573   | BAG1       | IPI00300531 | 8.820974 |
| hsa:5610  | EIF2AK2 | IPI00019463 | hsa:1147  | CHUK       | IPI00005104 | 8.820974 |
| hsa:5610  | EIF2AK2 | IPI00019463 | hsa:3551  | IKBKB      | IPI00024709 | 8.820974 |
| hsa:6850  | SYK     | IPI00018597 | hsa:7314  | UBB        | unknown     | 8.820974 |
| hsa:1956  | EGFR    | IPI00018274 | hsa:7314  | UBB        | unknown     | 8.820974 |
| hsa:5747  | PTK2    | IPI00012885 | hsa:4738  | NEDD8      | IPI00020008 | 8.820974 |
| hsa:5747  | PTK2    | IPI00012885 | hsa:9821  | RB1CC1     | IPI00783392 | 8.820974 |
| hsa:90    | ACVR1   | IPI00029219 | hsa:7311  | UBA52      | IPI00385127 | 8.820974 |

|           |          |             |           |            |             |          |
|-----------|----------|-------------|-----------|------------|-------------|----------|
| hsa:90    | ACVR1    | IPI00029219 | hsa:6233  | RPS27A7316 | IPI00654754 | 8.820974 |
| hsa:90    | ACVR1    | IPI00029219 | hsa:3551  | IKBKB      | IPI00024709 | 8.820974 |
| hsa:4067  | LYN      | IPI00298625 | hsa:7314  | UBB        | unknown     | 8.820974 |
| hsa:658   | BMPRI1B  | IPI00010862 | hsa:7311  | UBA52      | IPI00385127 | 8.820974 |
| hsa:658   | BMPRI1B  | IPI00010862 | hsa:6233  | RPS27A7316 | IPI00654754 | 8.820974 |
| hsa:5894  | RAF1     | IPI00021786 | hsa:573   | BAG1       | IPI00300531 | 8.820974 |
| hsa:5127  | PCTK1    | IPI00442129 | hsa:7917  | BAT3       | IPI00465128 | 8.820974 |
| hsa:5159  | PDGFRB   | IPI00015902 | hsa:573   | BAG1       | IPI00300531 | 8.820974 |
| hsa:2185  | PTK2B    | IPI00029702 | hsa:9821  | RB1CC1     | IPI00783392 | 8.820974 |
| hsa:8573  | CASK     | IPI00514301 | hsa:5071  | PARK2      | IPI00005254 | 8.820974 |
| hsa:23139 | MAST2    | IPI00514071 | hsa:6233  | RPS27A7316 | IPI00654754 | 8.820974 |
| hsa:57396 | CLK4     | IPI00180143 | hsa:59286 | UBL5       | IPI00013241 | 8.820974 |
| hsa:156   | ADRBK1   | IPI00012497 | hsa:7314  | UBB        | unknown     | 8.820974 |
| hsa:11035 | RIPK3    | IPI00294938 | hsa:7314  | UBB        | unknown     | 8.820974 |
| hsa:4215  | MAP3K3   | IPI00017801 | hsa:7316  | UBC        | unknown     | 8.820974 |
| hsa:4215  | MAP3K3   | IPI00017801 | hsa:7311  | UBA52      | IPI00385127 | 8.820974 |
| hsa:4215  | MAP3K3   | IPI00017801 | hsa:6233  | RPS27A7316 | IPI00654754 | 8.820974 |
| hsa:4215  | MAP3K3   | IPI00017801 | hsa:8266  | UBL4A      | IPI00005658 | 8.820974 |
| hsa:5979  | RET      | IPI00013983 | hsa:2197  | FAU        | IPI00397098 | 8.820974 |
| hsa:9641  | IKBKE    | IPI00029045 | hsa:10291 | SF3A1      | IPI00017451 | 8.820974 |
| hsa:23097 | CDC2L6   | IPI00250316 | hsa:9821  | RB1CC1     | IPI00783392 | 8.820974 |
| hsa:3611  | ILK      | IPI00013219 | hsa:10291 | SF3A1      | IPI00017451 | 8.820974 |
| hsa:3654  | IRAK1    | IPI00293652 | hsa:7341  | SUM01      | IPI00303105 | 8.820974 |
| hsa:10114 | HIPK3    | IPI00099522 | hsa:7341  | SUM01      | IPI00303105 | 8.820974 |
| hsa:4914  | NTRK1    | IPI00025076 | hsa:7314  | UBB        | unknown     | 8.820974 |
| hsa:2064  | ERBB2    | IPI00300384 | hsa:7314  | UBB        | unknown     | 8.820974 |
| hsa:3551  | IKBKB    | IPI00024709 | hsa:7314  | UBB        | unknown     | 8.820974 |
| hsa:1111  | CHEK1    | IPI00023664 | hsa:7314  | UBB        | unknown     | 8.820974 |
| hsa:8997  | KALRN    | IPI00877065 | hsa:6612  | SUM03      | IPI00299147 | 8.820974 |
| hsa:9020  | MAP3K14  | IPI00016099 | hsa:1147  | CHUK       | IPI00005104 | 8.820974 |
| hsa:6885  | MAP3K7   | IPI00295738 | hsa:1147  | CHUK       | IPI00005104 | 8.820974 |
| hsa:1326  | MAP3K8   | IPI00298726 | hsa:1147  | CHUK       | IPI00005104 | 8.820974 |
| hsa:29110 | TBK1     | IPI00293613 | hsa:3551  | IKBKB      | IPI00024709 | 8.820974 |
| hsa:9020  | MAP3K14  | IPI00016099 | hsa:3551  | IKBKB      | IPI00024709 | 8.820974 |
| hsa:9175  | MAP3K13  | IPI00006192 | hsa:3551  | IKBKB      | IPI00024709 | 8.820974 |
| hsa:9451  | EIF2AK3  | IPI00303053 | hsa:3551  | IKBKB      | IPI00024709 | 8.820974 |
| hsa:6885  | MAP3K7   | IPI00295738 | hsa:3551  | IKBKB      | IPI00024709 | 8.820974 |
| hsa:3654  | IRAK1    | IPI00293652 | hsa:7314  | UBB        | unknown     | 8.820974 |
| hsa:6885  | MAP3K7   | IPI00295738 | hsa:7314  | UBB        | unknown     | 8.820974 |
| hsa:4215  | MAP3K3   | IPI00017801 | hsa:7314  | UBB        | unknown     | 8.820974 |
| hsa:9020  | MAP3K14  | IPI00016099 | hsa:2197  | FAU        | IPI00397098 | 8.820974 |
| hsa:1017  | CDK2     | IPI00031681 | hsa:4738  | NEDD8      | IPI00020008 | 8.820974 |
| hsa:2932  | GSK3B    | IPI00028570 | hsa:10291 | SF3A1      | IPI00017451 | 8.820974 |
| hsa:1019  | CDK4     | IPI00007811 | hsa:7917  | BAT3       | IPI00465128 | 8.820974 |
| hsa:30011 | SH3KBP1  | IPI00294962 | hsa:50807 | DDEF1      | IPI00410303 | 8.794244 |
| hsa:274   | BIN1     | IPI00186966 | hsa:8853  | DDEF2      | IPI00022058 | 8.794244 |
| hsa:30011 | SH3KBP1  | IPI00294962 | hsa:8853  | DDEF2      | IPI00022058 | 8.794244 |
| hsa:29763 | PACSIN3  | IPI00329572 | hsa:8853  | DDEF2      | IPI00022058 | 8.794244 |
| hsa:29763 | PACSIN3  | IPI00329572 | hsa:50807 | DDEF1      | IPI00410303 | 8.794244 |
| hsa:2017  | CTTN     | IPI00029601 | hsa:50807 | DDEF1      | IPI00410303 | 8.794244 |
| hsa:81    | ACTN4    | IPI00013808 | hsa:89    | ACTN3      | IPI00032137 | 8.774303 |
| hsa:88    | ACTN2    | IPI00019884 | hsa:89    | ACTN3      | IPI00032137 | 8.774303 |
| hsa:801   | CALM1    | unknown     | hsa:5470  | PPEF2      | IPI00784130 | 8.774303 |
| hsa:801   | CALM1    | unknown     | hsa:5475  | PPEF1      | IPI00221149 | 8.774303 |
| hsa:808   | CALM3    | unknown     | hsa:5470  | PPEF2      | IPI00784130 | 8.774303 |
| hsa:808   | CALM3    | unknown     | hsa:5475  | PPEF1      | IPI00221149 | 8.774303 |
| hsa:51806 | CALML5   | IPI00021536 | hsa:5531  | PPP4C      | IPI00012833 | 8.774303 |
| hsa:805   | CALM2801 | IPI00075248 | hsa:5475  | PPEF1      | IPI00221149 | 8.774303 |
| hsa:805   | CALM2801 | IPI00075248 | hsa:5470  | PPEF2      | IPI00784130 | 8.774303 |
| hsa:5534  | PPP3R1   | IPI00027464 | hsa:5530  | PPP3CA     | IPI00179415 | 8.774303 |

|           |           |             |            |         |             |          |
|-----------|-----------|-------------|------------|---------|-------------|----------|
| hsa:5523  | PPP2R3A   | IPI00029144 | hsa:5536   | PPP5C   | IPI00019812 | 8.774303 |
| hsa:8767  | RIPK2     | IPI00021917 | hsa:4804   | NGFR    | IPI00027436 | 8.612487 |
| hsa:25    | ABL129892 | IPI00216969 | hsa:8936   | WASF1   | IPI00022007 | 8.460935 |
| hsa:23268 | DNMBP     | IPI00174025 | hsa:147179 | WIPF2   | IPI00435947 | 8.460935 |
| hsa:23268 | DNMBP     | IPI00174025 | hsa:8936   | WASF1   | IPI00022007 | 8.460935 |
| hsa:8440  | NCK2      | IPI00306531 | hsa:147179 | WIPF2   | IPI00435947 | 8.460935 |
| hsa:51225 | ABI3      | IPI00009273 | hsa:10163  | WASF2   | IPI00472164 | 8.460935 |
| hsa:1399  | CRKL      | IPI00004839 | hsa:7456   | WIPF1   | IPI00418328 | 8.460935 |
| hsa:4690  | NCK1      | IPI00028065 | hsa:7456   | WIPF1   | IPI00418328 | 8.460935 |
| hsa:2017  | CTTN      | IPI00029601 | hsa:7456   | WIPF1   | IPI00418328 | 8.460935 |
| hsa:3055  | HCK       | IPI00646510 | hsa:7456   | WIPF1   | IPI00418328 | 8.460935 |
| hsa:9051  | PSTPIP1   | IPI00022606 | hsa:8936   | WASF1   | IPI00022007 | 8.460935 |
| hsa:10006 | ABI1      | IPI00431025 | hsa:8936   | WASF1   | IPI00022007 | 8.460935 |
| hsa:4690  | NCK1      | IPI00028065 | hsa:8936   | WASF1   | IPI00022007 | 8.460935 |
| hsa:2534  | FYN       | IPI00219012 | hsa:8936   | WASF1   | IPI00022007 | 8.460935 |
| hsa:2885  | GRB2      | IPI00021327 | hsa:8936   | WASF1   | IPI00022007 | 8.460935 |
| hsa:5296  | PIK3R2    | IPI00011736 | hsa:10810  | WASF3   | IPI00299003 | 8.460935 |
| hsa:10458 | BAIAP2    | IPI00299088 | hsa:10163  | WASF2   | IPI00472164 | 8.460935 |
| hsa:29993 | PACSIN1   | IPI00011515 | hsa:10163  | WASF2   | IPI00472164 | 8.460935 |
| hsa:9051  | PSTPIP1   | IPI00022606 | hsa:10163  | WASF2   | IPI00472164 | 8.460935 |
| hsa:10006 | ABI1      | IPI00431025 | hsa:10163  | WASF2   | IPI00472164 | 8.460935 |
| hsa:1793  | DOCK1     | IPI00015286 | hsa:10163  | WASF2   | IPI00472164 | 8.460935 |
| hsa:695   | BTK       | IPI00029132 | hsa:10163  | WASF2   | IPI00472164 | 8.460935 |
| hsa:2534  | FYN       | IPI00219012 | hsa:10163  | WASF2   | IPI00472164 | 8.460935 |
| hsa:2885  | GRB2      | IPI00021327 | hsa:10163  | WASF2   | IPI00472164 | 8.460935 |
| hsa:2887  | GRB10     | IPI00012752 | hsa:613    | BCR     | IPI00004497 | 8.334357 |
| hsa:10507 | SEMA4D    | IPI00023807 | hsa:5364   | PLXNB1  | IPI00455329 | 8.303179 |
| hsa:8482  | SEMA7A    | IPI00025257 | hsa:10154  | PLXNC1  | IPI00024766 | 8.303179 |
| hsa:9723  | SEMA3E    | IPI00004494 | hsa:23129  | PLXND1  | IPI00412492 | 8.303179 |
| hsa:998   | CDC42     | IPI00007189 | hsa:23048  | FNBP1   | IPI00807625 | 8.259484 |
| hsa:998   | CDC42     | IPI00007189 | hsa:9322   | TRIP10  | IPI00168849 | 8.259484 |
| hsa:23433 | RHOQ      | IPI00012511 | hsa:9322   | TRIP10  | IPI00168849 | 8.259484 |
| hsa:8153  | RND2      | IPI00001436 | hsa:23048  | FNBP1   | IPI00807625 | 8.259484 |
| hsa:5781  | PTPN11    | IPI00658023 | hsa:6654   | SOS1    | IPI00020131 | 8.230247 |
| hsa:6464  | SHC1      | IPI00645103 | hsa:6655   | SOS2    | IPI00020134 | 8.230247 |
| hsa:6464  | SHC1      | IPI00645103 | hsa:6654   | SOS1    | IPI00020131 | 8.230247 |
| hsa:2885  | GRB2      | IPI00021327 | hsa:613    | BCR     | IPI00004497 | 8.217025 |
| hsa:5795  | PTPRJ     | IPI00847732 | hsa:5335   | PLCG1   | IPI00016736 | 8.214204 |
| hsa:5788  | PTPRC     | IPI00844079 | hsa:2885   | GRB2    | IPI00021327 | 8.214204 |
| hsa:5788  | PTPRC     | IPI00844079 | hsa:5921   | RASA1   | IPI00026262 | 8.214204 |
| hsa:80329 | ULBP1     | IPI00018861 | hsa:8302   | KLRC4   | IPI00307816 | 8.206695 |
| hsa:2159  | F10       | IPI00019576 | hsa:5340   | PLG     | IPI00019580 | 8.175675 |
| hsa:55620 | STAP2     | IPI00383883 | hsa:6777   | STAT5B  | IPI00103415 | 8.141027 |
| hsa:55620 | STAP2     | IPI00383883 | hsa:6776   | STAT5A  | IPI00030783 | 8.141027 |
| hsa:55620 | STAP2     | IPI00383883 | hsa:6774   | STAT3   | IPI00784414 | 8.141027 |
| hsa:7057  | THBS1     | IPI00296099 | hsa:4041   | LRP5    | IPI00744811 | 8.129133 |
| hsa:7057  | THBS1     | IPI00296099 | hsa:3690   | ITGB3   | IPI00303283 | 8.129133 |
| hsa:5338  | PLD2      | IPI00024727 | hsa:87     | ACTN1   | IPI00013508 | 8.122498 |
| hsa:8711  | TNK1      | IPI00022633 | hsa:5335   | PLCG1   | IPI00016736 | 8.065543 |
| hsa:5781  | PTPN11    | IPI00658023 | hsa:1399   | CRKL    | IPI00004839 | 8.037331 |
| hsa:5781  | PTPN11    | IPI00658023 | hsa:2885   | GRB2    | IPI00021327 | 8.037331 |
| hsa:5777  | PTPN6     | IPI00218604 | hsa:2885   | GRB2    | IPI00021327 | 8.037331 |
| hsa:55072 | RNF31     | IPI00094740 | hsa:10616  | RBCK1   | IPI00010748 | 8.01132  |
| hsa:3716  | JAK1      | IPI00443765 | hsa:5321   | PLA2G4A | IPI00026108 | 8.007271 |
| hsa:79705 | LRRK1     | IPI00747813 | hsa:10298  | PAK4    | IPI00014068 | 7.90924  |
| hsa:30837 | SOCS7     | IPI00022329 | hsa:5296   | PIK3R2  | IPI00011736 | 7.896873 |
| hsa:8651  | SOCS1     | IPI00021491 | hsa:5296   | PIK3R2  | IPI00011736 | 7.896873 |
| hsa:9306  | SOCS6     | IPI00297351 | hsa:5296   | PIK3R2  | IPI00011736 | 7.896873 |
| hsa:6712  | SPTBN2    | IPI00012645 | hsa:10497  | UNC13B  | IPI00478689 | 7.896872 |
| hsa:8471  | IRS4      | IPI00020729 | hsa:5290   | PIK3CA  | IPI00031386 | 7.896872 |

|            |          |             |            |           |             |          |
|------------|----------|-------------|------------|-----------|-------------|----------|
| hsa:8660   | IRS2     | IPI00464978 | hsa:5290   | PIK3CA    | IPI00031386 | 7.896872 |
| hsa:51177  | PLEKH01  | IPI00016877 | hsa:57154  | SMURF1    | IPI00217054 | 7.896872 |
| hsa:26060  | APPL1    | IPI00015836 | hsa:5290   | PIK3CA    | IPI00031386 | 7.896872 |
| hsa:6242   | RTKN     | IPI00029834 | hsa:57154  | SMURF1    | IPI00217054 | 7.896872 |
| hsa:23612  | PHLDA3   | IPI00329599 | hsa:55841  | WWC3      | IPI00395925 | 7.896872 |
| hsa:6711   | SPTBN1   | IPI00005614 | hsa:8904   | CPNE1     | IPI00018452 | 7.896872 |
| hsa:6711   | SPTBN1   | IPI00005614 | hsa:131034 | CPNE4     | IPI00059186 | 7.896872 |
| hsa:55843  | ARHGAP15 | IPI00182116 | hsa:57154  | SMURF1    | IPI00217054 | 7.896872 |
| hsa:5788   | PTPRC    | IPI00844079 | hsa:3937   | LCP2      | IPI00297169 | 7.834447 |
| hsa:868    | CBLB     | IPI00292856 | hsa:8853   | DDEF2     | IPI00022058 | 7.804794 |
| hsa:868    | CBLB     | IPI00292856 | hsa:50807  | DDEF1     | IPI00410303 | 7.804794 |
| hsa:26469  | PTPN18   | IPI00152019 | hsa:7006   | TEC       | IPI00000878 | 7.756829 |
| hsa:5771   | PTPN2    | IPI00219695 | hsa:6714   | SRC       | IPI00641230 | 7.756829 |
| hsa:26469  | PTPN18   | IPI00152019 | hsa:6714   | SRC       | IPI00641230 | 7.756829 |
| hsa:26469  | PTPN18   | IPI00152019 | hsa:25     | ABL129892 | IPI00216969 | 7.756829 |
| hsa:5782   | PTPN12   | IPI00289082 | hsa:25     | ABL129892 | IPI00216969 | 7.756829 |
| hsa:26469  | PTPN18   | IPI00152019 | hsa:1445   | CSK       | IPI00013212 | 7.756829 |
| hsa:5782   | PTPN12   | IPI00289082 | hsa:1445   | CSK       | IPI00013212 | 7.756829 |
| hsa:6452   | SH3BP2   | IPI00218997 | hsa:5336   | PLCG2     | IPI00329185 | 7.744085 |
| hsa:27071  | DAPP1    | IPI00384620 | hsa:5335   | PLCG1     | IPI00016736 | 7.744085 |
| hsa:6452   | SH3BP2   | IPI00218997 | hsa:5335   | PLCG1     | IPI00016736 | 7.744085 |
| hsa:27071  | DAPP1    | IPI00384620 | hsa:5336   | PLCG2     | IPI00329185 | 7.744085 |
| hsa:7057   | THBS1    | IPI00296099 | hsa:182    | JAG1      | IPI00099650 | 7.739154 |
| hsa:3084   | NRG1     | IPI00296902 | hsa:2065   | ERBB3     | IPI00298285 | 7.73481  |
| hsa:5310   | PKD1     | IPI00409566 | hsa:55729  | ATF7IP    | IPI00795654 | 7.691759 |
| hsa:5310   | PKD1     | IPI00409566 | hsa:2335   | FN1       | IPI00022418 | 7.691759 |
| hsa:116844 | LRG1     | IPI00022417 | hsa:2335   | FN1       | IPI00022418 | 7.691759 |
| hsa:5549   | PRELP    | IPI00020987 | hsa:2335   | FN1       | IPI00022418 | 7.691759 |
| hsa:1634   | DCN      | IPI00012119 | hsa:2335   | FN1       | IPI00022418 | 7.691759 |
| hsa:55914  | ERBB2IP  | IPI00438286 | hsa:3691   | ITGB4     | IPI00027422 | 7.691759 |
| hsa:8125   | ANP32A   | IPI00025849 | hsa:5788   | PTPRC     | IPI00844079 | 7.691759 |
| hsa:1634   | DCN      | IPI00012119 | hsa:7373   | COL14A1   | IPI00176193 | 7.691759 |
| hsa:6714   | SRC      | IPI00641230 | hsa:28964  | GIT1      | IPI00384861 | 7.678576 |
| hsa:6464   | SHC1     | IPI00645103 | hsa:5335   | PLCG1     | IPI00016736 | 7.639366 |
| hsa:6464   | SHC1     | IPI00645103 | hsa:5336   | PLCG2     | IPI00329185 | 7.639366 |
| hsa:4739   | NEDD9    | IPI00031407 | hsa:64780  | MICAL1    | IPI00157757 | 7.627661 |
| hsa:5781   | PTPN11   | IPI00658023 | hsa:139716 | GAB3      | IPI00103456 | 7.622199 |
| hsa:5781   | PTPN11   | IPI00658023 | hsa:9846   | GAB2      | IPI00186990 | 7.622199 |
| hsa:5781   | PTPN11   | IPI00658023 | hsa:2549   | GAB1      | IPI00031068 | 7.622199 |
| hsa:5781   | PTPN11   | IPI00658023 | hsa:8471   | IRS4      | IPI00020729 | 7.622199 |
| hsa:5781   | PTPN11   | IPI00658023 | hsa:8660   | IRS2      | IPI00464978 | 7.622199 |
| hsa:5781   | PTPN11   | IPI00658023 | hsa:3667   | IRS1      | IPI00019471 | 7.622199 |
| hsa:6464   | SHC1     | IPI00645103 | hsa:1796   | DOK1      | IPI00015287 | 7.622199 |
| hsa:6464   | SHC1     | IPI00645103 | hsa:9846   | GAB2      | IPI00186990 | 7.622199 |
| hsa:6464   | SHC1     | IPI00645103 | hsa:2549   | GAB1      | IPI00031068 | 7.622199 |
| hsa:6464   | SHC1     | IPI00645103 | hsa:8660   | IRS2      | IPI00464978 | 7.622199 |
| hsa:6464   | SHC1     | IPI00645103 | hsa:3667   | IRS1      | IPI00019471 | 7.622199 |
| hsa:5295   | PIK3R1   | IPI00021448 | hsa:1759   | DNM1      | IPI00873844 | 7.622199 |
| hsa:5295   | PIK3R1   | IPI00021448 | hsa:139716 | GAB3      | IPI00103456 | 7.622199 |
| hsa:5295   | PIK3R1   | IPI00021448 | hsa:9846   | GAB2      | IPI00186990 | 7.622199 |
| hsa:5295   | PIK3R1   | IPI00021448 | hsa:116986 | CENTG1    | IPI00217393 | 7.622199 |
| hsa:5295   | PIK3R1   | IPI00021448 | hsa:2549   | GAB1      | IPI00031068 | 7.622199 |
| hsa:5295   | PIK3R1   | IPI00021448 | hsa:8471   | IRS4      | IPI00020729 | 7.622199 |
| hsa:5295   | PIK3R1   | IPI00021448 | hsa:8660   | IRS2      | IPI00464978 | 7.622199 |
| hsa:5777   | PTPN6    | IPI00218604 | hsa:8660   | IRS2      | IPI00464978 | 7.622199 |
| hsa:5777   | PTPN6    | IPI00218604 | hsa:9846   | GAB2      | IPI00186990 | 7.622199 |
| hsa:5777   | PTPN6    | IPI00218604 | hsa:8471   | IRS4      | IPI00020729 | 7.622199 |
| hsa:5777   | PTPN6    | IPI00218604 | hsa:1796   | DOK1      | IPI00015287 | 7.622199 |
| hsa:9021   | SOCS3    | IPI00297349 | hsa:8660   | IRS2      | IPI00464978 | 7.622199 |
| hsa:4068   | SH2D1A   | IPI00032401 | hsa:1796   | DOK1      | IPI00015287 | 7.622199 |

|           |              |             |           |         |             |          |
|-----------|--------------|-------------|-----------|---------|-------------|----------|
| hsa:8651  | SOCS1        | IPI00021491 | hsa:8660  | IRS2    | IPI00464978 | 7.622199 |
| hsa:3635  | INPP5D646743 | IPI00329213 | hsa:9046  | DOK2    | IPI00022602 | 7.622199 |
| hsa:3635  | INPP5D646743 | IPI00329213 | hsa:1796  | DOK1    | IPI00015287 | 7.622199 |
| hsa:3635  | INPP5D646743 | IPI00329213 | hsa:79930 | DOK3    | IPI00156649 | 7.622199 |
| hsa:30837 | SOCS7        | IPI00022329 | hsa:8660  | IRS2    | IPI00464978 | 7.622199 |
| hsa:2887  | GRB10        | IPI00012752 | hsa:1796  | DOK1    | IPI00015287 | 7.622199 |
| hsa:2888  | GRB14        | IPI00030917 | hsa:3667  | IRS1    | IPI00019471 | 7.622199 |
| hsa:8503  | PIK3R3       | IPI00513745 | hsa:3667  | IRS1    | IPI00019471 | 7.622199 |
| hsa:9021  | SOCS3        | IPI00297349 | hsa:3667  | IRS1    | IPI00019471 | 7.622199 |
| hsa:8651  | SOCS1        | IPI00021491 | hsa:3667  | IRS1    | IPI00019471 | 7.622199 |
| hsa:5295  | PIK3R1       | IPI00021448 | hsa:3667  | IRS1    | IPI00019471 | 7.622199 |
| hsa:3635  | INPP5D646743 | IPI00329213 | hsa:2549  | GAB1    | IPI00031068 | 7.622199 |
| hsa:30837 | SOCS7        | IPI00022329 | hsa:8471  | IRS4    | IPI00020729 | 7.622199 |
| hsa:9306  | SOCS6        | IPI00297351 | hsa:8471  | IRS4    | IPI00020729 | 7.622199 |
| hsa:3635  | INPP5D646743 | IPI00329213 | hsa:9846  | GAB2    | IPI00186990 | 7.622199 |
| hsa:8503  | PIK3R3       | IPI00513745 | hsa:8660  | IRS2    | IPI00464978 | 7.622199 |
| hsa:9306  | SOCS6        | IPI00297351 | hsa:8660  | IRS2    | IPI00464978 | 7.622199 |
| hsa:9113  | LATS1        | IPI00005858 | hsa:983   | CDC2    | IPI00073536 | 7.486222 |
| hsa:9113  | LATS1        | IPI00005858 | hsa:6789  | STK4    | IPI00011488 | 7.486222 |
| hsa:26524 | LATS2        | IPI00016690 | hsa:6788  | STK3    | IPI00411984 | 7.486222 |
| hsa:6464  | SHC1         | IPI00645103 | hsa:6777  | STAT5B  | IPI00103415 | 7.477232 |
| hsa:6464  | SHC1         | IPI00645103 | hsa:6776  | STAT5A  | IPI00030783 | 7.477232 |
| hsa:5921  | RASA1        | IPI00026262 | hsa:11060 | WWP2    | IPI00013010 | 7.473417 |
| hsa:5921  | RASA1        | IPI00026262 | hsa:11059 | WWP1    | IPI00013009 | 7.473417 |
| hsa:5777  | PTPN6        | IPI00218604 | hsa:919   | CD247   | IPI00218634 | 7.462293 |
| hsa:10750 | GRAP         | IPI00013864 | hsa:5335  | PLCG1   | IPI00016736 | 7.446236 |
| hsa:4690  | NCK1         | IPI00028065 | hsa:5335  | PLCG1   | IPI00016736 | 7.446236 |
| hsa:10451 | VAV3         | IPI00299763 | hsa:5335  | PLCG1   | IPI00016736 | 7.446236 |
| hsa:2885  | GRB2         | IPI00021327 | hsa:5335  | PLCG1   | IPI00016736 | 7.446236 |
| hsa:6714  | SRC          | IPI00641230 | hsa:22920 | KIFAP3  | IPI00647465 | 7.40035  |
| hsa:5771  | PTPN2        | IPI00219695 | hsa:3716  | JAK1    | IPI00443765 | 7.351199 |
| hsa:5782  | PTPN12       | IPI00289082 | hsa:3717  | JAK2    | IPI00031016 | 7.351199 |
| hsa:5771  | PTPN2        | IPI00219695 | hsa:3718  | JAK3    | IPI00002773 | 7.351199 |
| hsa:6712  | SPTBN2       | IPI00012645 | hsa:6708  | SPTA1   | IPI00220741 | 7.324976 |
| hsa:6711  | SPTBN1       | IPI00005614 | hsa:6709  | SPTAN1  | IPI00844215 | 7.324976 |
| hsa:6711  | SPTBN1       | IPI00005614 | hsa:6708  | SPTA1   | IPI00220741 | 7.324976 |
| hsa:5295  | PIK3R1       | IPI00021448 | hsa:5921  | RASA1   | IPI00026262 | 7.324635 |
| hsa:9021  | SOCS3        | IPI00297349 | hsa:5921  | RASA1   | IPI00026262 | 7.324635 |
| hsa:3717  | JAK2         | IPI00031016 | hsa:613   | BCR     | IPI00004497 | 7.273233 |
| hsa:2242  | FES          | IPI00294344 | hsa:613   | BCR     | IPI00004497 | 7.273233 |
| hsa:2885  | GRB2         | IPI00021327 | hsa:5287  | PIK3C2B | IPI00292056 | 7.261689 |
| hsa:2217  | FCGRT        | IPI00026646 | hsa:567   | B2M     | IPI00004656 | 7.258001 |
| hsa:3107  | HLA-C3106    | IPI00004657 | hsa:3802  | KIR2DL1 | IPI00302335 | 7.258001 |
| hsa:3107  | HLA-C3106    | IPI00004657 | hsa:3803  | KIR2DL2 | IPI00019883 | 7.258001 |
| hsa:3107  | HLA-C3106    | IPI00004657 | hsa:3804  | KIR2DL3 | IPI00719576 | 7.258001 |
| hsa:3107  | HLA-C3106    | IPI00004657 | hsa:3809  | KIR2DS4 | IPI00816305 | 7.258001 |
| hsa:3107  | HLA-C3106    | IPI00004657 | hsa:3807  | KIR2DS2 | IPI00873250 | 7.258001 |
| hsa:3107  | HLA-C3106    | IPI00004657 | hsa:3806  | KIR2DS1 | unknown     | 7.258001 |
| hsa:10188 | TNK2         | IPI00167089 | hsa:4690  | NCK1    | IPI00028065 | 7.254171 |
| hsa:10188 | TNK2         | IPI00167089 | hsa:2885  | GRB2    | IPI00021327 | 7.254171 |
| hsa:7454  | WAS          | IPI00001545 | hsa:1457  | CSNK2A1 | IPI00744507 | 7.217161 |
| hsa:7454  | WAS          | IPI00001545 | hsa:1459  | CSNK2A2 | IPI00020602 | 7.217161 |
| hsa:5058  | PAK1         | IPI00656138 | hsa:658   | BMPRI1B | IPI00010862 | 7.217161 |
| hsa:5058  | PAK1         | IPI00656138 | hsa:984   | CDC2L1  | IPI00215999 | 7.217161 |
| hsa:5058  | PAK1         | IPI00656138 | hsa:9943  | OXSRI   | IPI00010080 | 7.217161 |
| hsa:5058  | PAK1         | IPI00656138 | hsa:5170  | PDPK1   | IPI00002538 | 7.217161 |
| hsa:5058  | PAK1         | IPI00656138 | hsa:1459  | CSNK2A2 | IPI00020602 | 7.217161 |
| hsa:5058  | PAK1         | IPI00656138 | hsa:1457  | CSNK2A1 | IPI00744507 | 7.217161 |
| hsa:5062  | PAK2         | IPI00787208 | hsa:8569  | MKNK1   | IPI00304048 | 7.217161 |
| hsa:5058  | PAK1         | IPI00656138 | hsa:7046  | TGFBR1  | IPI00005733 | 7.217161 |



|           |              |             |            |          |             |          |
|-----------|--------------|-------------|------------|----------|-------------|----------|
| hsa:23580 | CDC42EP4     | IPI00015894 | hsa:7046   | TGFBR1   | IPI00005733 | 7.217161 |
| hsa:5058  | PAK1         | IPI00656138 | hsa:7048   | TGFBR2   | IPI00020431 | 7.217161 |
| hsa:5062  | PAK2         | IPI00787208 | hsa:5594   | MAPK1    | IPI00003479 | 7.217161 |
| hsa:5058  | PAK1         | IPI00656138 | hsa:5594   | MAPK1    | IPI00003479 | 7.217161 |
| hsa:5062  | PAK2         | IPI00787208 | hsa:5595   | MAPK3    | IPI00018195 | 7.217161 |
| hsa:5058  | PAK1         | IPI00656138 | hsa:1020   | CDK5     | IPI00023530 | 7.217161 |
| hsa:5058  | PAK1         | IPI00656138 | hsa:90     | ACVR1    | IPI00029219 | 7.217161 |
| hsa:5058  | PAK1         | IPI00656138 | hsa:9641   | IKBKE    | IPI00029045 | 7.217161 |
| hsa:5791  | PTPRE        | IPI00334825 | hsa:7525   | YES1     | IPI00013981 | 7.121488 |
| hsa:26191 | PTPN22       | IPI00219138 | hsa:3932   | LCK      | IPI00394952 | 7.121488 |
| hsa:5791  | PTPRE        | IPI00334825 | hsa:6714   | SRC      | IPI00641230 | 7.121488 |
| hsa:11099 | PTPN21       | IPI00004388 | hsa:6714   | SRC      | IPI00641230 | 7.121488 |
| hsa:5770  | PTPN1        | IPI00297261 | hsa:6714   | SRC      | IPI00641230 | 7.121488 |
| hsa:5786  | PTPRA        | IPI00221067 | hsa:6714   | SRC      | IPI00641230 | 7.121488 |
| hsa:5791  | PTPRE        | IPI00334825 | hsa:2534   | FYN      | IPI00219012 | 7.121488 |
| hsa:5786  | PTPRA        | IPI00221067 | hsa:2534   | FYN      | IPI00219012 | 7.121488 |
| hsa:84867 | PTPN5        | IPI00008837 | hsa:2534   | FYN      | IPI00219012 | 7.121488 |
| hsa:26191 | PTPN22       | IPI00219138 | hsa:1445   | CSK      | IPI00013212 | 7.121488 |
| hsa:11099 | PTPN21       | IPI00004388 | hsa:7006   | TEC      | IPI00000878 | 7.121488 |
| hsa:3055  | HCK          | IPI00646510 | hsa:613    | BCR      | IPI00004497 | 7.05422  |
| hsa:6714  | SRC          | IPI00641230 | hsa:613    | BCR      | IPI00004497 | 7.05422  |
| hsa:25    | ABL129892    | IPI00216969 | hsa:613    | BCR      | IPI00004497 | 7.05422  |
| hsa:27    | ABL2         | IPI00329488 | hsa:613    | BCR      | IPI00004497 | 7.05422  |
| hsa:640   | BLK          | IPI00554756 | hsa:613    | BCR      | IPI00004497 | 7.05422  |
| hsa:7057  | THBS1        | IPI00296099 | hsa:4035   | LRP1     | IPI00020557 | 7.025894 |
| hsa:10507 | SEMA4D       | IPI00023807 | hsa:971    | CD72     | IPI00010851 | 6.989186 |
| hsa:2011  | MARK2        | IPI00555838 | hsa:4215   | MAP3K3   | IPI00017801 | 6.983271 |
| hsa:4147  | MATN2        | IPI00168520 | hsa:2201   | FBN2     | IPI00019439 | 6.909763 |
| hsa:30011 | SH3KBP1      | IPI00294962 | hsa:201176 | ARHGAP27 | IPI00645265 | 6.909763 |
| hsa:2199  | FBLN2        | IPI00023824 | hsa:2200   | FBN1     | IPI00328113 | 6.909763 |
| hsa:5566  | PRKACA730418 | IPI00396630 | hsa:9351   | SLC9A3R2 | IPI00385034 | 6.895014 |
| hsa:5566  | PRKACA730418 | IPI00396630 | hsa:4842   | NOS1     | IPI00217225 | 6.895014 |
| hsa:5584  | PRKCI        | IPI00016639 | hsa:56288  | PARD3    | IPI00154915 | 6.895014 |
| hsa:6198  | RPS6KB1      | IPI00216132 | hsa:55607  | PPP1R9A  | IPI00008144 | 6.895014 |
| hsa:6198  | RPS6KB1      | IPI00216132 | hsa:84687  | PPP1R9B  | IPI00816035 | 6.895014 |
| hsa:5566  | PRKACA730418 | IPI00396630 | hsa:84687  | PPP1R9B  | IPI00816035 | 6.895014 |
| hsa:6195  | RPS6KA1      | IPI00017305 | hsa:9223   | MAGI1    | IPI00470759 | 6.895014 |
| hsa:6196  | RPS6KA2      | IPI00300321 | hsa:9223   | MAGI1    | IPI00470759 | 6.895014 |
| hsa:6197  | RPS6KA3      | IPI00020898 | hsa:9223   | MAGI1    | IPI00470759 | 6.895014 |
| hsa:23678 | SGK3         | IPI00655852 | hsa:9351   | SLC9A3R2 | IPI00385034 | 6.895014 |
| hsa:6446  | SGK          | IPI00297590 | hsa:9351   | SLC9A3R2 | IPI00385034 | 6.895014 |
| hsa:2321  | FLT1         | IPI00018335 | hsa:8828   | NRP2     | IPI00029693 | 6.86211  |
| hsa:6405  | SEMA3F       | IPI00298003 | hsa:8828   | NRP2     | IPI00029693 | 6.86211  |
| hsa:10512 | SEMA3C       | IPI00019209 | hsa:8828   | NRP2     | IPI00029693 | 6.86211  |
| hsa:7869  | SEMA3B       | IPI00012283 | hsa:8828   | NRP2     | IPI00029693 | 6.86211  |
| hsa:5868  | RAB5A        | IPI00023510 | hsa:8411   | EEA1     | IPI00329536 | 6.768748 |
| hsa:4651  | MYO10        | IPI00289258 | hsa:801    | CALM1    | unknown     | 6.768748 |
| hsa:4651  | MYO10        | IPI00289258 | hsa:810    | CALML3   | IPI00216984 | 6.768748 |
| hsa:6640  | SNTA1        | IPI00164528 | hsa:801    | CALM1    | unknown     | 6.768748 |
| hsa:8853  | DDEF2        | IPI00022058 | hsa:9185   | REPS2    | IPI00382936 | 6.768748 |
| hsa:1785  | DNM2         | IPI00033022 | hsa:2060   | EPS15    | IPI00292134 | 6.768748 |
| hsa:1759  | DNM1         | IPI00873844 | hsa:2060   | EPS15    | IPI00292134 | 6.768748 |
| hsa:5869  | RAB5B        | IPI00017344 | hsa:8411   | EEA1     | IPI00329536 | 6.768748 |
| hsa:83593 | RASSF5       | IPI00332633 | hsa:5908   | RAP1B    | IPI00015148 | 6.768748 |
| hsa:54453 | RIN2         | IPI00549715 | hsa:5878   | RAB5C    | IPI00016339 | 6.768748 |
| hsa:79890 | RIN3         | IPI00745485 | hsa:5878   | RAB5C    | IPI00016339 | 6.768748 |
| hsa:51552 | RAB14        | IPI00291928 | hsa:8411   | EEA1     | IPI00329536 | 6.768748 |
| hsa:23612 | PHLDA3       | IPI00329599 | hsa:8604   | SLC25A12 | IPI00386271 | 6.768748 |
| hsa:83593 | RASSF5       | IPI00332633 | hsa:5906   | RAP1A    | IPI00019345 | 6.768748 |
| hsa:1785  | DNM2         | IPI00033022 | hsa:553115 | PEF1     | IPI00018235 | 6.768748 |

|           |         |             |           |         |             |          |
|-----------|---------|-------------|-----------|---------|-------------|----------|
| hsa:54453 | RIN2    | IPI00549715 | hsa:5868  | RAB5A   | IPI00023510 | 6.768748 |
| hsa:9610  | RIN1    | IPI00014454 | hsa:5868  | RAB5A   | IPI00023510 | 6.768748 |
| hsa:5333  | PLCD1   | IPI00746030 | hsa:801   | CALM1   | unknown     | 6.768748 |
| hsa:2886  | GRB7    | IPI00448767 | hsa:801   | CALM1   | unknown     | 6.768748 |
| hsa:84033 | OBSCN   | IPI00288940 | hsa:801   | CALM1   | unknown     | 6.768748 |
| hsa:83593 | RASSF5  | IPI00332633 | hsa:5898  | RALA    | IPI00217519 | 6.768748 |
| hsa:23095 | KIF1B   | IPI00029011 | hsa:11261 | CHP     | IPI00218924 | 6.768748 |
| hsa:9459  | ARHGEF6 | IPI00014256 | hsa:826   | CAPNS1  | IPI00025084 | 6.768748 |
| hsa:9770  | RASSF2  | IPI00414179 | hsa:3265  | HRAS    | IPI00000006 | 6.768748 |
| hsa:54922 | RASIP1  | IPI00015805 | hsa:3265  | HRAS    | IPI00000006 | 6.768748 |
| hsa:83593 | RASSF5  | IPI00332633 | hsa:3265  | HRAS    | IPI00000006 | 6.768748 |
| hsa:9610  | RIN1    | IPI00014454 | hsa:3265  | HRAS    | IPI00000006 | 6.768748 |
| hsa:11186 | RASSF1  | IPI00221057 | hsa:3265  | HRAS    | IPI00000006 | 6.768748 |
| hsa:50807 | DDEF1   | IPI00410303 | hsa:9185  | REPS2   | IPI00382936 | 6.768748 |
| hsa:54453 | RIN2    | IPI00549715 | hsa:5869  | RAB5B   | IPI00017344 | 6.768748 |
| hsa:79890 | RIN3    | IPI00745485 | hsa:5869  | RAB5B   | IPI00017344 | 6.768748 |
| hsa:9610  | RIN1    | IPI00014454 | hsa:5869  | RAB5B   | IPI00017344 | 6.768748 |
| hsa:9770  | RASSF2  | IPI00414179 | hsa:3845  | KRAS    | IPI00423568 | 6.768748 |
| hsa:83593 | RASSF5  | IPI00332633 | hsa:3845  | KRAS    | IPI00423568 | 6.768748 |
| hsa:54922 | RASIP1  | IPI00015805 | hsa:22800 | RRAS2   | IPI00012512 | 6.768748 |
| hsa:83593 | RASSF5  | IPI00332633 | hsa:22800 | RRAS2   | IPI00012512 | 6.768748 |
| hsa:9610  | RIN1    | IPI00014454 | hsa:22800 | RRAS2   | IPI00012512 | 6.768748 |
| hsa:54922 | RASIP1  | IPI00015805 | hsa:5906  | RAP1A   | IPI00019345 | 6.768748 |
| hsa:1609  | DGKQ    | IPI00005565 | hsa:387   | RHOA    | IPI00478231 | 6.768748 |
| hsa:54922 | RASIP1  | IPI00015805 | hsa:6237  | RRAS    | IPI00020418 | 6.768748 |
| hsa:83593 | RASSF5  | IPI00332633 | hsa:6237  | RRAS    | IPI00020418 | 6.768748 |
| hsa:54922 | RASIP1  | IPI00015805 | hsa:22808 | MRAS    | IPI00024166 | 6.768748 |
| hsa:83593 | RASSF5  | IPI00332633 | hsa:22808 | MRAS    | IPI00024166 | 6.768748 |
| hsa:83593 | RASSF5  | IPI00332633 | hsa:4893  | NRAS    | IPI00000005 | 6.768748 |
| hsa:54922 | RASIP1  | IPI00015805 | hsa:5911  | RAP2A   | IPI00019346 | 6.768748 |
| hsa:83593 | RASSF5  | IPI00332633 | hsa:5911  | RAP2A   | IPI00019346 | 6.768748 |
| hsa:57403 | RAB22A  | IPI00007756 | hsa:8411  | EEA1    | IPI00329536 | 6.768748 |
| hsa:5878  | RAB5C   | IPI00016339 | hsa:8411  | EEA1    | IPI00329536 | 6.768748 |
| hsa:23612 | PHLDA3  | IPI00329599 | hsa:30844 | EHD4    | IPI00005578 | 6.768748 |
| hsa:84033 | OBSCN   | IPI00288940 | hsa:808   | CALM3   | unknown     | 6.768748 |
| hsa:4068  | SH2D1A  | IPI00032401 | hsa:8874  | ARHGEF7 | IPI00449906 | 6.745753 |
| hsa:4068  | SH2D1A  | IPI00032401 | hsa:9459  | ARHGEF6 | IPI00014256 | 6.745753 |
| hsa:5058  | PAK1    | IPI00656138 | hsa:5604  | MAP2K1  | IPI00219604 | 6.695921 |
| hsa:6464  | SHC1    | IPI00645103 | hsa:2059  | EPS8    | IPI00290337 | 6.695175 |
| hsa:6461  | SHB     | IPI00604688 | hsa:2059  | EPS8    | IPI00290337 | 6.695175 |
| hsa:5770  | PTPN1   | IPI00297261 | hsa:7297  | TYK2    | IPI00022353 | 6.65843  |
| hsa:26191 | PTPN22  | IPI00219138 | hsa:7535  | ZAP70   | IPI00329789 | 6.65843  |
| hsa:5770  | PTPN1   | IPI00297261 | hsa:3717  | JAK2    | IPI00031016 | 6.65843  |
| hsa:11099 | PTPN21  | IPI00004388 | hsa:660   | BMX     | IPI00020899 | 6.65843  |
| hsa:3932  | LCK     | IPI00394952 | hsa:5290  | PIK3CA  | IPI00031386 | 6.654326 |
| hsa:4690  | NCK1    | IPI00028065 | hsa:8874  | ARHGEF7 | IPI00449906 | 6.620304 |
| hsa:7186  | TRAF2   | IPI00030278 | hsa:23139 | MAST2   | IPI00514071 | 6.595756 |
| hsa:7186  | TRAF2   | IPI00030278 | hsa:11183 | MAP4K5  | IPI00294842 | 6.595756 |
| hsa:7186  | TRAF2   | IPI00030278 | hsa:29110 | TBK1    | IPI00293613 | 6.595756 |
| hsa:7186  | TRAF2   | IPI00030278 | hsa:9020  | MAP3K14 | IPI00016099 | 6.595756 |
| hsa:7186  | TRAF2   | IPI00030278 | hsa:8767  | RIPK2   | IPI00021917 | 6.595756 |
| hsa:7186  | TRAF2   | IPI00030278 | hsa:5871  | MAP4K2  | IPI00149094 | 6.595756 |
| hsa:7186  | TRAF2   | IPI00030278 | hsa:5601  | MAPK9   | IPI00024673 | 6.595756 |
| hsa:7186  | TRAF2   | IPI00030278 | hsa:4217  | MAP3K5  | IPI00412433 | 6.595756 |
| hsa:7186  | TRAF2   | IPI00030278 | hsa:23043 | TNIK    | IPI00145805 | 6.595756 |
| hsa:7186  | TRAF2   | IPI00030278 | hsa:1025  | CDK9    | IPI00301923 | 6.595756 |
| hsa:7186  | TRAF2   | IPI00030278 | hsa:51347 | TAOK3   | IPI00410485 | 6.595756 |
| hsa:7186  | TRAF2   | IPI00030278 | hsa:11035 | RIPK3   | IPI00294938 | 6.595756 |
| hsa:7186  | TRAF2   | IPI00030278 | hsa:1326  | MAP3K8  | IPI00298726 | 6.595756 |
| hsa:7189  | TRAF6   | IPI00743663 | hsa:1326  | MAP3K8  | IPI00298726 | 6.595756 |

|           |              |             |           |           |             |          |
|-----------|--------------|-------------|-----------|-----------|-------------|----------|
| hsa:7189  | TRAF6        | IPI00743663 | hsa:5608  | MAP2K6    | IPI00003814 | 6.595756 |
| hsa:7189  | TRAF6        | IPI00743663 | hsa:5609  | MAP2K7    | IPI00023636 | 6.595756 |
| hsa:7189  | TRAF6        | IPI00743663 | hsa:4215  | MAP3K3    | IPI00017801 | 6.595756 |
| hsa:7189  | TRAF6        | IPI00743663 | hsa:55437 | ALS2CR2   | IPI00032099 | 6.595756 |
| hsa:7189  | TRAF6        | IPI00743663 | hsa:23139 | MAST2     | IPI00514071 | 6.595756 |
| hsa:7189  | TRAF6        | IPI00743663 | hsa:9020  | MAP3K14   | IPI00016099 | 6.595756 |
| hsa:7189  | TRAF6        | IPI00743663 | hsa:8767  | RIPK2     | IPI00021917 | 6.595756 |
| hsa:7189  | TRAF6        | IPI00743663 | hsa:6885  | MAP3K7    | IPI00295738 | 6.595756 |
| hsa:7186  | TRAF2        | IPI00030278 | hsa:85366 | MYLK2     | IPI00221127 | 6.595756 |
| hsa:7186  | TRAF2        | IPI00030278 | hsa:9641  | IKBKE     | IPI00029045 | 6.595756 |
| hsa:7189  | TRAF6        | IPI00743663 | hsa:6714  | SRC       | IPI00641230 | 6.595756 |
| hsa:7189  | TRAF6        | IPI00743663 | hsa:6850  | SYK       | IPI00018597 | 6.595756 |
| hsa:7186  | TRAF2        | IPI00030278 | hsa:5585  | PKN1      | IPI00002803 | 6.595756 |
| hsa:7189  | TRAF6        | IPI00743663 | hsa:5604  | MAP2K1    | IPI00219604 | 6.595756 |
| hsa:7189  | TRAF6        | IPI00743663 | hsa:25    | ABL129892 | IPI00216969 | 6.595756 |
| hsa:7189  | TRAF6        | IPI00743663 | hsa:5590  | PRKCZ     | IPI00013749 | 6.595756 |
| hsa:7186  | TRAF2        | IPI00030278 | hsa:2081  | ERN1      | IPI00015974 | 6.595756 |
| hsa:7189  | TRAF6        | IPI00743663 | hsa:4217  | MAP3K5    | IPI00412433 | 6.595756 |
| hsa:3716  | JAK1         | IPI00443765 | hsa:5336  | PLCG2     | IPI00329185 | 6.58402  |
| hsa:3717  | JAK2         | IPI00031016 | hsa:5336  | PLCG2     | IPI00329185 | 6.58402  |
| hsa:6850  | SYK          | IPI00018597 | hsa:5336  | PLCG2     | IPI00329185 | 6.58402  |
| hsa:6850  | SYK          | IPI00018597 | hsa:5335  | PLCG1     | IPI00016736 | 6.58402  |
| hsa:7535  | ZAP70        | IPI00329789 | hsa:5335  | PLCG1     | IPI00016736 | 6.58402  |
| hsa:5566  | PRKACA730418 | IPI00396630 | hsa:10636 | RGS14     | IPI00012893 | 6.528682 |
| hsa:3932  | LCK          | IPI00394952 | hsa:6776  | STAT5A    | IPI00030783 | 6.482107 |
| hsa:3932  | LCK          | IPI00394952 | hsa:6772  | STAT1     | IPI00030781 | 6.482107 |
| hsa:6714  | SRC          | IPI00641230 | hsa:6778  | STAT6     | IPI00030782 | 6.482107 |
| hsa:6714  | SRC          | IPI00641230 | hsa:6777  | STAT5B    | IPI00103415 | 6.482107 |
| hsa:6714  | SRC          | IPI00641230 | hsa:6776  | STAT5A    | IPI00030783 | 6.482107 |
| hsa:6714  | SRC          | IPI00641230 | hsa:6772  | STAT1     | IPI00030781 | 6.482107 |
| hsa:3055  | HCK          | IPI00646510 | hsa:6774  | STAT3     | IPI00784414 | 6.482107 |
| hsa:6714  | SRC          | IPI00641230 | hsa:6774  | STAT3     | IPI00784414 | 6.482107 |
| hsa:3932  | LCK          | IPI00394952 | hsa:6774  | STAT3     | IPI00784414 | 6.482107 |
| hsa:2534  | FYN          | IPI00219012 | hsa:6772  | STAT1     | IPI00030781 | 6.482107 |
| hsa:9113  | LATS1        | IPI00005858 | hsa:3984  | LIMK1     | IPI00291702 | 6.47421  |
| hsa:29760 | BLNK         | IPI00002434 | hsa:7409  | VAV1      | IPI00011696 | 6.466181 |
| hsa:8651  | SOCS1        | IPI00021491 | hsa:7409  | VAV1      | IPI00011696 | 6.466181 |
| hsa:3937  | LCP2         | IPI00297169 | hsa:7409  | VAV1      | IPI00011696 | 6.466181 |
| hsa:6461  | SHB          | IPI00604688 | hsa:7409  | VAV1      | IPI00011696 | 6.466181 |
| hsa:8651  | SOCS1        | IPI00021491 | hsa:7410  | VAV2      | IPI00446303 | 6.466181 |
| hsa:2885  | GRB2         | IPI00021327 | hsa:6655  | SOS2      | IPI00020134 | 6.441242 |
| hsa:2885  | GRB2         | IPI00021327 | hsa:6654  | SOS1      | IPI00020131 | 6.441242 |
| hsa:1398  | CRK          | IPI00004838 | hsa:6654  | SOS1      | IPI00020131 | 6.441242 |
| hsa:1399  | CRKL         | IPI00004839 | hsa:6655  | SOS2      | IPI00020134 | 6.441242 |
| hsa:5296  | PIK3R2       | IPI00011736 | hsa:6654  | SOS1      | IPI00020131 | 6.441242 |
| hsa:8440  | NCK2         | IPI00306531 | hsa:6654  | SOS1      | IPI00020131 | 6.441242 |
| hsa:10750 | GRAP         | IPI00013864 | hsa:6654  | SOS1      | IPI00020131 | 6.441242 |
| hsa:1399  | CRKL         | IPI00004839 | hsa:6654  | SOS1      | IPI00020131 | 6.441242 |
| hsa:4690  | NCK1         | IPI00028065 | hsa:6654  | SOS1      | IPI00020131 | 6.441242 |
| hsa:9402  | GRAP2        | IPI00026928 | hsa:6655  | SOS2      | IPI00020134 | 6.441242 |
| hsa:2017  | CTTN         | IPI00029601 | hsa:2245  | FGD1      | IPI00024312 | 6.43213  |
| hsa:9479  | MAPK8IP1     | IPI00023133 | hsa:7074  | TIAM1     | IPI00011400 | 6.43213  |
| hsa:23542 | MAPK8IP2     | IPI00031777 | hsa:7074  | TIAM1     | IPI00011400 | 6.43213  |
| hsa:5781  | PTPN11       | IPI00658023 | hsa:4739  | NEDD9     | IPI00031407 | 6.375242 |
| hsa:660   | BMX          | IPI00020899 | hsa:5906  | RAP1A     | IPI00019345 | 6.305398 |
| hsa:207   | AKT1         | IPI00012866 | hsa:998   | CDC42     | IPI00007189 | 6.305398 |
| hsa:207   | AKT1         | IPI00012866 | hsa:9545  | RAB3D     | IPI00032808 | 6.305398 |
| hsa:208   | AKT2         | IPI00012870 | hsa:9545  | RAB3D     | IPI00032808 | 6.305398 |
| hsa:207   | AKT1         | IPI00012866 | hsa:5879  | RAC1      | IPI00010271 | 6.305398 |
| hsa:8878  | SQSTM1       | IPI00784104 | hsa:4914  | NTRK1     | IPI00025076 | 6.248191 |

|            |              |             |            |          |             |          |
|------------|--------------|-------------|------------|----------|-------------|----------|
| hsa:8878   | SQSTM1       | IPI00784104 | hsa:8737   | RIPK1    | IPI00013773 | 6.248191 |
| hsa:8878   | SQSTM1       | IPI00784104 | hsa:3654   | IRAK1    | IPI00293652 | 6.248191 |
| hsa:8878   | SQSTM1       | IPI00784104 | hsa:7046   | TGFBR1   | IPI00005733 | 6.248191 |
| hsa:4077   | NBR1         | IPI00871941 | hsa:7273   | TTN      | IPI00759754 | 6.248191 |
| hsa:8878   | SQSTM1       | IPI00784104 | hsa:90     | ACVR1    | IPI00029219 | 6.248191 |
| hsa:8878   | SQSTM1       | IPI00784104 | hsa:5590   | PRKCZ    | IPI00013749 | 6.248191 |
| hsa:8878   | SQSTM1       | IPI00784104 | hsa:658    | BMPR1B   | IPI00010862 | 6.248191 |
| hsa:8878   | SQSTM1       | IPI00784104 | hsa:5584   | PRKCI    | IPI00016639 | 6.248191 |
| hsa:1432   | MAPK14       | IPI00002857 | hsa:5604   | MAP2K1   | IPI00219604 | 6.174682 |
| hsa:1019   | CDK4         | IPI00007811 | hsa:5573   | PRKAR1A  | IPI00021831 | 6.174682 |
| hsa:5979   | RET          | IPI00013983 | hsa:5576   | PRKAR2A  | IPI00219774 | 6.174682 |
| hsa:5594   | MAPK1        | IPI00003479 | hsa:5605   | MAP2K2   | IPI00003783 | 6.174682 |
| hsa:5594   | MAPK1        | IPI00003479 | hsa:5604   | MAP2K1   | IPI00219604 | 6.174682 |
| hsa:5595   | MAPK3        | IPI00018195 | hsa:5605   | MAP2K2   | IPI00003783 | 6.174682 |
| hsa:5595   | MAPK3        | IPI00018195 | hsa:5604   | MAP2K1   | IPI00219604 | 6.174682 |
| hsa:1956   | EGFR         | IPI00018274 | hsa:5573   | PRKAR1A  | IPI00021831 | 6.174682 |
| hsa:1020   | CDK5         | IPI00023530 | hsa:5604   | MAP2K1   | IPI00219604 | 6.174682 |
| hsa:5566   | PRKACA730418 | IPI00396630 | hsa:5573   | PRKAR1A  | IPI00021831 | 6.174682 |
| hsa:1017   | CDK2         | IPI00031681 | hsa:5573   | PRKAR1A  | IPI00021831 | 6.174682 |
| hsa:9891   | NUAK1        | IPI00028566 | hsa:5573   | PRKAR1A  | IPI00021831 | 6.174682 |
| hsa:57761  | TRIB3        | IPI00290307 | hsa:5604   | MAP2K1   | IPI00219604 | 6.174682 |
| hsa:8844   | KSR1         | IPI00217124 | hsa:5605   | MAP2K2   | IPI00003783 | 6.174682 |
| hsa:8844   | KSR1         | IPI00217124 | hsa:5604   | MAP2K1   | IPI00219604 | 6.174682 |
| hsa:283455 | KSR2         | IPI00414043 | hsa:5604   | MAP2K1   | IPI00219604 | 6.174682 |
| hsa:10221  | TRIB1        | IPI00290308 | hsa:5604   | MAP2K1   | IPI00219604 | 6.174682 |
| hsa:4216   | MAP3K4       | IPI00386260 | hsa:5604   | MAP2K1   | IPI00219604 | 6.174682 |
| hsa:5613   | PRKX         | IPI00020904 | hsa:5573   | PRKAR1A  | IPI00021831 | 6.174682 |
| hsa:5613   | PRKX         | IPI00020904 | hsa:5576   | PRKAR2A  | IPI00219774 | 6.174682 |
| hsa:5335   | PLCG1        | IPI00016736 | hsa:116986 | CENTG1   | IPI00217393 | 6.17239  |
| hsa:9479   | MAPK8IP1     | IPI00023133 | hsa:64283  | RGNEF    | IPI00455803 | 6.08283  |
| hsa:695    | BTK          | IPI00029132 | hsa:5336   | PLCG2    | IPI00329185 | 6.069618 |
| hsa:3702   | ITK          | IPI00004566 | hsa:5336   | PLCG2    | IPI00329185 | 6.069618 |
| hsa:7006   | TEC          | IPI00000878 | hsa:5335   | PLCG1    | IPI00016736 | 6.069618 |
| hsa:695    | BTK          | IPI00029132 | hsa:5335   | PLCG1    | IPI00016736 | 6.069618 |
| hsa:3702   | ITK          | IPI00004566 | hsa:5335   | PLCG1    | IPI00016736 | 6.069618 |
| hsa:7006   | TEC          | IPI00000878 | hsa:5336   | PLCG2    | IPI00329185 | 6.069618 |
| hsa:5794   | PTPRH        | IPI00760988 | hsa:3932   | LCK      | IPI00394952 | 6.051408 |
| hsa:5788   | PTPRC        | IPI00844079 | hsa:3932   | LCK      | IPI00394952 | 6.051408 |
| hsa:5788   | PTPRC        | IPI00844079 | hsa:4067   | LYN      | IPI00298625 | 6.051408 |
| hsa:5788   | PTPRC        | IPI00844079 | hsa:2534   | FYN      | IPI00219012 | 6.051408 |
| hsa:5879   | RAC1         | IPI00010271 | hsa:55561  | CDC42BPG | IPI00454910 | 6.039414 |
| hsa:998    | CDC42        | IPI00007189 | hsa:55561  | CDC42BPG | IPI00454910 | 6.039414 |
| hsa:23433  | RHOQ         | IPI00012511 | hsa:55561  | CDC42BPG | IPI00454910 | 6.039414 |
| hsa:2885   | GRB2         | IPI00021327 | hsa:8826   | IQGAP1   | IPI00009342 | 5.974607 |
| hsa:660    | BMX          | IPI00020899 | hsa:6776   | STAT5A   | IPI00030783 | 5.962548 |
| hsa:660    | BMX          | IPI00020899 | hsa:6772   | STAT1    | IPI00030781 | 5.962548 |
| hsa:660    | BMX          | IPI00020899 | hsa:6774   | STAT3    | IPI00784414 | 5.962548 |
| hsa:6714   | SRC          | IPI00641230 | hsa:9855   | FARP2    | IPI00744221 | 5.957561 |
| hsa:5921   | RASA1        | IPI00026262 | hsa:613    | BCR      | IPI00004497 | 5.940567 |
| hsa:4036   | LRP2         | IPI00024292 | hsa:57763  | ANKRA2   | IPI00011902 | 5.912097 |
| hsa:1951   | CELSR3       | unknown     | hsa:55075  | UACA     | IPI00173359 | 5.912097 |
| hsa:9378   | NRXN1        | IPI00428511 | hsa:23026  | MYO16    | IPI00444012 | 5.912097 |
| hsa:10542  | HBXIP        | IPI00012831 | hsa:28964  | GIT1     | IPI00384861 | 5.912097 |
| hsa:10188  | TNK2         | IPI00167089 | hsa:2534   | FYN      | IPI00219012 | 5.897898 |
| hsa:2534   | FYN          | IPI00219012 | hsa:115703 | SNX26    | IPI00549274 | 5.868048 |
| hsa:10811  | NOXA1        | IPI00654838 | hsa:5879   | RAC1     | IPI00010271 | 5.842074 |
| hsa:4688   | NCF2         | IPI00021070 | hsa:5879   | RAC1     | IPI00010271 | 5.842074 |
| hsa:10811  | NOXA1        | IPI00654838 | hsa:5880   | RAC2     | IPI00010270 | 5.842074 |
| hsa:4688   | NCF2         | IPI00021070 | hsa:5880   | RAC2     | IPI00010270 | 5.842074 |
| hsa:4688   | NCF2         | IPI00021070 | hsa:998    | CDC42    | IPI00007189 | 5.842074 |

|           |        |             |            |           |             |          |
|-----------|--------|-------------|------------|-----------|-------------|----------|
| hsa:10811 | NOXA1  | IPI00654838 | hsa:58480  | RHOU      | IPI00009644 | 5.842074 |
| hsa:5803  | PTPRZ1 | IPI00216283 | hsa:2534   | FYN       | IPI00219012 | 5.841224 |
| hsa:3135  | HLA-G  | IPI00015988 | hsa:3805   | KIR2DL4   | IPI00871481 | 5.82831  |
| hsa:3135  | HLA-G  | IPI00015988 | hsa:10288  | LILRB2    | IPI00376762 | 5.82831  |
| hsa:3135  | HLA-G  | IPI00015988 | hsa:10859  | LILRB1    | IPI00643313 | 5.82831  |
| hsa:5590  | PRKCZ  | IPI00013749 | hsa:9260   | PDLIM7    | IPI00023122 | 5.799536 |
| hsa:2885  | GRB2   | IPI00021327 | hsa:2549   | GAB1      | IPI00031068 | 5.785317 |
| hsa:2885  | GRB2   | IPI00021327 | hsa:8471   | IRS4      | IPI00020729 | 5.785317 |
| hsa:2885  | GRB2   | IPI00021327 | hsa:1759   | DNM1      | IPI00873844 | 5.785317 |
| hsa:2885  | GRB2   | IPI00021327 | hsa:8660   | IRS2      | IPI00464978 | 5.785317 |
| hsa:2885  | GRB2   | IPI00021327 | hsa:139716 | GAB3      | IPI00103456 | 5.785317 |
| hsa:2885  | GRB2   | IPI00021327 | hsa:9846   | GAB2      | IPI00186990 | 5.785317 |
| hsa:1398  | CRK    | IPI00004838 | hsa:8660   | IRS2      | IPI00464978 | 5.785317 |
| hsa:1398  | CRK    | IPI00004838 | hsa:55715  | DOK4      | IPI00550728 | 5.785317 |
| hsa:1398  | CRK    | IPI00004838 | hsa:2549   | GAB1      | IPI00031068 | 5.785317 |
| hsa:1398  | CRK    | IPI00004838 | hsa:8471   | IRS4      | IPI00020729 | 5.785317 |
| hsa:1399  | CRKL   | IPI00004839 | hsa:9846   | GAB2      | IPI00186990 | 5.785317 |
| hsa:1399  | CRKL   | IPI00004839 | hsa:2549   | GAB1      | IPI00031068 | 5.785317 |
| hsa:1399  | CRKL   | IPI00004839 | hsa:8471   | IRS4      | IPI00020729 | 5.785317 |
| hsa:1399  | CRKL   | IPI00004839 | hsa:1796   | DOK1      | IPI00015287 | 5.785317 |
| hsa:5296  | PIK3R2 | IPI00011736 | hsa:8660   | IRS2      | IPI00464978 | 5.785317 |
| hsa:4690  | NCK1   | IPI00028065 | hsa:9046   | DOK2      | IPI00022602 | 5.785317 |
| hsa:4690  | NCK1   | IPI00028065 | hsa:1796   | DOK1      | IPI00015287 | 5.785317 |
| hsa:8440  | NCK2   | IPI00306531 | hsa:1796   | DOK1      | IPI00015287 | 5.785317 |
| hsa:2885  | GRB2   | IPI00021327 | hsa:1785   | DNM2      | IPI00033022 | 5.785317 |
| hsa:2885  | GRB2   | IPI00021327 | hsa:5338   | PLD2      | IPI00024727 | 5.785317 |
| hsa:1398  | CRK    | IPI00004838 | hsa:3667   | IRS1      | IPI00019471 | 5.785317 |
| hsa:5296  | PIK3R2 | IPI00011736 | hsa:3667   | IRS1      | IPI00019471 | 5.785317 |
| hsa:2885  | GRB2   | IPI00021327 | hsa:3667   | IRS1      | IPI00019471 | 5.785317 |
| hsa:2885  | GRB2   | IPI00021327 | hsa:6640   | SNTA1     | IPI00164528 | 5.785317 |
| hsa:9402  | GRAP2  | IPI00026928 | hsa:2549   | GAB1      | IPI00031068 | 5.785317 |
| hsa:8440  | NCK2   | IPI00306531 | hsa:1759   | DNM1      | IPI00873844 | 5.785317 |
| hsa:4690  | NCK1   | IPI00028065 | hsa:1759   | DNM1      | IPI00873844 | 5.785317 |
| hsa:9402  | GRAP2  | IPI00026928 | hsa:9846   | GAB2      | IPI00186990 | 5.785317 |
| hsa:9402  | GRAP2  | IPI00026928 | hsa:139716 | GAB3      | IPI00103456 | 5.785317 |
| hsa:5578  | PRKCA  | IPI00385449 | hsa:9463   | PICK1     | IPI00160369 | 5.748303 |
| hsa:5578  | PRKCA  | IPI00385449 | hsa:4842   | NOS1      | IPI00217225 | 5.748303 |
| hsa:5582  | PRKCG  | IPI00007128 | hsa:56288  | PARD3     | IPI00154915 | 5.748303 |
| hsa:5578  | PRKCA  | IPI00385449 | hsa:10207  | INADL     | IPI00304064 | 5.748303 |
| hsa:5582  | PRKCG  | IPI00007128 | hsa:9463   | PICK1     | IPI00160369 | 5.748303 |
| hsa:5578  | PRKCA  | IPI00385449 | hsa:10755  | GIPC1     | IPI00024705 | 5.748303 |
| hsa:4140  | MARK3  | IPI00183118 | hsa:5588   | PRKCQ     | IPI00029196 | 5.74524  |
| hsa:6892  | TAPBP  | IPI00007327 | hsa:3107   | HLA-C3106 | IPI00004657 | 5.718425 |
| hsa:6892  | TAPBP  | IPI00007327 | hsa:3105   | HLA-A     | IPI00472882 | 5.718425 |
| hsa:4214  | MAP3K1 | IPI00855985 | hsa:5604   | MAP2K1    | IPI00219604 | 5.676106 |
| hsa:3716  | JAK1   | IPI00443765 | hsa:3667   | IRS1      | IPI00019471 | 5.669805 |
| hsa:3716  | JAK1   | IPI00443765 | hsa:8660   | IRS2      | IPI00464978 | 5.669805 |
| hsa:3717  | JAK2   | IPI00031016 | hsa:8660   | IRS2      | IPI00464978 | 5.669805 |
| hsa:3717  | JAK2   | IPI00031016 | hsa:3667   | IRS1      | IPI00019471 | 5.669805 |
| hsa:2241  | FER    | IPI00029263 | hsa:3667   | IRS1      | IPI00019471 | 5.669805 |
| hsa:2242  | FES    | IPI00294344 | hsa:1796   | DOK1      | IPI00015287 | 5.669805 |
| hsa:2242  | FES    | IPI00294344 | hsa:8660   | IRS2      | IPI00464978 | 5.669805 |
| hsa:2242  | FES    | IPI00294344 | hsa:3667   | IRS1      | IPI00019471 | 5.669805 |
| hsa:6850  | SYK    | IPI00018597 | hsa:9846   | GAB2      | IPI00186990 | 5.669805 |
| hsa:3718  | JAK3   | IPI00002773 | hsa:8660   | IRS2      | IPI00464978 | 5.669805 |
| hsa:3718  | JAK3   | IPI00002773 | hsa:3667   | IRS1      | IPI00019471 | 5.669805 |
| hsa:7297  | TYK2   | IPI00022353 | hsa:8660   | IRS2      | IPI00464978 | 5.669805 |
| hsa:7297  | TYK2   | IPI00022353 | hsa:3667   | IRS1      | IPI00019471 | 5.669805 |
| hsa:7535  | ZAP70  | IPI00329789 | hsa:9846   | GAB2      | IPI00186990 | 5.669805 |
| hsa:57787 | MARK4  | IPI00064797 | hsa:5582   | PRKCQ     | IPI00007128 | 5.64336  |

|            |           |             |           |         |             |          |
|------------|-----------|-------------|-----------|---------|-------------|----------|
| hsa:54622  | ARL15     | IPI00005163 | hsa:10342 | TFG     | IPI00294619 | 5.640623 |
| hsa:54622  | ARFRP2    | IPI00005163 | hsa:10342 | TFG     | IPI00294619 | 5.640623 |
| hsa:6774   | STAT3     | IPI00784414 | hsa:7707  | ZNF148  | IPI00010833 | 5.627464 |
| hsa:660    | BMX       | IPI00020899 | hsa:80230 | RUFY1   | IPI00744637 | 5.627464 |
| hsa:2885   | GRB2      | IPI00021327 | hsa:11186 | RASSF1  | IPI00221057 | 5.627464 |
| hsa:2885   | GRB2      | IPI00021327 | hsa:5913  | RAPSN   | IPI00828059 | 5.627464 |
| hsa:23371  | TENC1     | IPI00465295 | hsa:8328  | GFI1B   | IPI00003110 | 5.627464 |
| hsa:8412   | BCAR3     | IPI00179053 | hsa:10155 | TRIM28  | IPI00438229 | 5.627464 |
| hsa:3107   | HLA-C3106 | IPI00004657 | hsa:10288 | LILRB2  | IPI00376762 | 5.620856 |
| hsa:3107   | HLA-C3106 | IPI00004657 | hsa:10859 | LILRB1  | IPI00643313 | 5.620856 |
| hsa:3105   | HLA-A     | IPI00472882 | hsa:10288 | LILRB2  | IPI00376762 | 5.620856 |
| hsa:3105   | HLA-A     | IPI00472882 | hsa:3812  | KIR3DL2 | IPI00302352 | 5.620856 |
| hsa:3105   | HLA-A     | IPI00472882 | hsa:10859 | LILRB1  | IPI00643313 | 5.620856 |
| hsa:3106   | HLA-B     | unknown     | hsa:10288 | LILRB2  | IPI00376762 | 5.620856 |
| hsa:3106   | HLA-B     | unknown     | hsa:3811  | KIR3DL1 | IPI00871440 | 5.620856 |
| hsa:3106   | HLA-B     | unknown     | hsa:10859 | LILRB1  | IPI00643313 | 5.620856 |
| hsa:3134   | HLA-F     | IPI00646822 | hsa:10288 | LILRB2  | IPI00376762 | 5.620856 |
| hsa:3134   | HLA-F     | IPI00646822 | hsa:10859 | LILRB1  | IPI00643313 | 5.620856 |
| hsa:2885   | GRB2      | IPI00021327 | hsa:7410  | VAV2    | IPI00446303 | 5.602914 |
| hsa:2885   | GRB2      | IPI00021327 | hsa:7409  | VAV1    | IPI00011696 | 5.602914 |
| hsa:1398   | CRK       | IPI00004838 | hsa:7409  | VAV1    | IPI00011696 | 5.602914 |
| hsa:6503   | SLA       | IPI00009499 | hsa:7409  | VAV1    | IPI00011696 | 5.602914 |
| hsa:2059   | EPS8      | IPI00290337 | hsa:6654  | SOS1    | IPI00020131 | 5.546739 |
| hsa:64787  | EPS8L2    | IPI00414315 | hsa:6654  | SOS1    | IPI00020131 | 5.546739 |
| hsa:54869  | EPS8L1    | IPI00301250 | hsa:6654  | SOS1    | IPI00020131 | 5.546739 |
| hsa:274    | BIN1      | IPI00186966 | hsa:6654  | SOS1    | IPI00020131 | 5.546739 |
| hsa:112574 | SNAG1     | IPI00045219 | hsa:6654  | SOS1    | IPI00020131 | 5.546739 |
| hsa:51429  | SNX9      | IPI00001883 | hsa:6654  | SOS1    | IPI00020131 | 5.546739 |
| hsa:29763  | PACSIN3   | IPI00329572 | hsa:6654  | SOS1    | IPI00020131 | 5.546739 |
| hsa:29993  | PACSIN1   | IPI00011515 | hsa:6654  | SOS1    | IPI00020131 | 5.546739 |
| hsa:51225  | ABI3      | IPI00009273 | hsa:6654  | SOS1    | IPI00020131 | 5.546739 |
| hsa:23607  | CD2AP     | IPI00412771 | hsa:6654  | SOS1    | IPI00020131 | 5.546739 |
| hsa:10006  | ABI1      | IPI00431025 | hsa:6654  | SOS1    | IPI00020131 | 5.546739 |
| hsa:30011  | SH3KBP1   | IPI00294962 | hsa:6654  | SOS1    | IPI00020131 | 5.546739 |
| hsa:152503 | SH3D19    | IPI00472155 | hsa:6655  | SOS2    | IPI00020134 | 5.546739 |
| hsa:112574 | SNAG1     | IPI00045219 | hsa:6655  | SOS2    | IPI00020134 | 5.546739 |
| hsa:51429  | SNX9      | IPI00001883 | hsa:6655  | SOS2    | IPI00020134 | 5.546739 |
| hsa:29763  | PACSIN3   | IPI00329572 | hsa:6655  | SOS2    | IPI00020134 | 5.546739 |
| hsa:23607  | CD2AP     | IPI00412771 | hsa:6655  | SOS2    | IPI00020134 | 5.546739 |
| hsa:10006  | ABI1      | IPI00431025 | hsa:6655  | SOS2    | IPI00020134 | 5.546739 |
| hsa:5580   | PRKCD     | IPI00329236 | hsa:7074  | TIAM1   | IPI00011400 | 5.544667 |
| hsa:8440   | NCK2      | IPI00306531 | hsa:7205  | TRIP6   | IPI00301561 | 5.505847 |
| hsa:8440   | NCK2      | IPI00306531 | hsa:7205  | TRIP6   | IPI00301561 | 5.505847 |
| hsa:3667   | IRS1      | IPI00019471 | hsa:613   | BCR     | IPI00004497 | 5.476863 |
| hsa:2885   | GRB2      | IPI00021327 | hsa:5296  | PIK3R2  | IPI00011736 | 5.472017 |
| hsa:1399   | CRKL      | IPI00004839 | hsa:5296  | PIK3R2  | IPI00011736 | 5.472017 |
| hsa:3055   | HCK       | IPI00646510 | hsa:5336  | PLCG2   | IPI00329185 | 5.467452 |
| hsa:3055   | HCK       | IPI00646510 | hsa:5335  | PLCG1   | IPI00016736 | 5.467452 |
| hsa:3932   | LCK       | IPI00394952 | hsa:5336  | PLCG2   | IPI00329185 | 5.467452 |
| hsa:3932   | LCK       | IPI00394952 | hsa:5335  | PLCG1   | IPI00016736 | 5.467452 |
| hsa:6714   | SRC       | IPI00641230 | hsa:5335  | PLCG1   | IPI00016736 | 5.467452 |
| hsa:25     | ABL129892 | IPI00216969 | hsa:5335  | PLCG1   | IPI00016736 | 5.467452 |
| hsa:4067   | LYN       | IPI00298625 | hsa:5336  | PLCG2   | IPI00329185 | 5.467452 |
| hsa:2534   | FYN       | IPI00219012 | hsa:5336  | PLCG2   | IPI00329185 | 5.467452 |
| hsa:640    | BLK       | IPI00554756 | hsa:5336  | PLCG2   | IPI00329185 | 5.467452 |
| hsa:4067   | LYN       | IPI00298625 | hsa:5335  | PLCG1   | IPI00016736 | 5.467452 |
| hsa:2534   | FYN       | IPI00219012 | hsa:5335  | PLCG1   | IPI00016736 | 5.467452 |
| hsa:5788   | PTPRC     | IPI00844079 | hsa:7535  | ZAP70   | IPI00329789 | 5.466945 |
| hsa:5788   | PTPRC     | IPI00844079 | hsa:7297  | TYK2    | IPI00022353 | 5.466945 |
| hsa:5788   | PTPRC     | IPI00844079 | hsa:3716  | JAK1    | IPI00443765 | 5.466945 |

|            |          |             |            |         |             |          |
|------------|----------|-------------|------------|---------|-------------|----------|
| hsa:5788   | PTPRC    | IPI00844079 | hsa:3717   | JAK2    | IPI00031016 | 5.466945 |
| hsa:5788   | PTPRC    | IPI00844079 | hsa:3718   | JAK3    | IPI00002773 | 5.466945 |
| hsa:1432   | MAPK14   | IPI00002857 | hsa:5321   | PLA2G4A | IPI00026108 | 5.439601 |
| hsa:7046   | TGFBR1   | IPI00005733 | hsa:64750  | SMURF2  | IPI00329664 | 5.439601 |
| hsa:5594   | MAPK1    | IPI00003479 | hsa:23236  | PLCB1   | IPI00219563 | 5.439601 |
| hsa:5580   | PRKCD    | IPI00329236 | hsa:5290   | PIK3CA  | IPI00031386 | 5.439601 |
| hsa:5580   | PRKCD    | IPI00329236 | hsa:23236  | PLCB1   | IPI00219563 | 5.439601 |
| hsa:5595   | MAPK3    | IPI00018195 | hsa:23236  | PLCB1   | IPI00219563 | 5.439601 |
| hsa:9252   | RPS6KA5  | IPI00335101 | hsa:5321   | PLA2G4A | IPI00026108 | 5.439601 |
| hsa:1956   | EGFR     | IPI00018274 | hsa:5287   | PIK3C2B | IPI00292056 | 5.439601 |
| hsa:5604   | MAP2K1   | IPI00219604 | hsa:131034 | CPNE4   | IPI00059186 | 5.439601 |
| hsa:5604   | MAP2K1   | IPI00219604 | hsa:8904   | CPNE1   | IPI00018452 | 5.439601 |
| hsa:5578   | PRKCA    | IPI00385449 | hsa:23236  | PLCB1   | IPI00219563 | 5.439601 |
| hsa:5058   | PAK1     | IPI00656138 | hsa:57154  | SMURF1  | IPI00217054 | 5.439601 |
| hsa:1452   | CSNK1A1  | IPI00183400 | hsa:143425 | SYT9    | IPI00386377 | 5.439601 |
| hsa:5590   | PRKCZ    | IPI00013749 | hsa:23286  | WWC1    | IPI00217340 | 5.439601 |
| hsa:1459   | CSNK2A2  | IPI00020602 | hsa:57154  | SMURF1  | IPI00217054 | 5.439601 |
| hsa:3815   | KIT      | IPI00022296 | hsa:51196  | PLCE1   | IPI00791109 | 5.439601 |
| hsa:5159   | PDGFRB   | IPI00015902 | hsa:5290   | PIK3CA  | IPI00031386 | 5.439601 |
| hsa:5592   | PRKG1    | IPI00436355 | hsa:5331   | PLCB3   | IPI00010400 | 5.439601 |
| hsa:5579   | PRKCB1   | IPI00010466 | hsa:148281 | SYT6    | IPI00180851 | 5.439601 |
| hsa:8767   | RIPK2    | IPI00021917 | hsa:57154  | SMURF1  | IPI00217054 | 5.439601 |
| hsa:818    | CAMK2G   | IPI00334344 | hsa:5331   | PLCB3   | IPI00010400 | 5.439601 |
| hsa:4914   | NTRK1    | IPI00025076 | hsa:23327  | NEDD4L  | IPI00640924 | 5.439601 |
| hsa:7465   | WEE1     | IPI00025830 | hsa:57154  | SMURF1  | IPI00217054 | 5.439601 |
| hsa:3480   | IGF1R    | IPI00027232 | hsa:4734   | NEDD4   | IPI00009322 | 5.439601 |
| hsa:8550   | MAPKAPK5 | IPI00160672 | hsa:5321   | PLA2G4A | IPI00026108 | 5.439601 |
| hsa:8569   | MKNK1    | IPI00304048 | hsa:5321   | PLA2G4A | IPI00026108 | 5.439601 |
| hsa:816    | CAMK2B   | IPI00334271 | hsa:5331   | PLCB3   | IPI00010400 | 5.439601 |
| hsa:3656   | IRAK2    | IPI00304986 | hsa:57154  | SMURF1  | IPI00217054 | 5.439601 |
| hsa:6446   | SGK      | IPI00297590 | hsa:23327  | NEDD4L  | IPI00640924 | 5.439601 |
| hsa:9943   | OXSRI    | IPI00010080 | hsa:57154  | SMURF1  | IPI00217054 | 5.439601 |
| hsa:5593   | PRKG2    | IPI00012322 | hsa:5331   | PLCB3   | IPI00010400 | 5.439601 |
| hsa:5606   | MAP2K3   | IPI00220438 | hsa:5330   | PLCB2   | IPI00744517 | 5.439601 |
| hsa:65125  | WNK1     | IPI00004472 | hsa:127833 | SYT2    | IPI00219274 | 5.439601 |
| hsa:5608   | MAP2K6   | IPI00003814 | hsa:5330   | PLCB2   | IPI00744517 | 5.439601 |
| hsa:1452   | CSNK1A1  | IPI00183400 | hsa:23208  | SYT11   | IPI00027875 | 5.439601 |
| hsa:23043  | TNIK     | IPI00145805 | hsa:23286  | WWC1    | IPI00217340 | 5.439601 |
| hsa:2064   | ERBB2    | IPI00300384 | hsa:5287   | PIK3C2B | IPI00292056 | 5.439601 |
| hsa:4058   | LTK      | IPI00021365 | hsa:5287   | PIK3C2B | IPI00292056 | 5.439601 |
| hsa:6446   | SGK      | IPI00297590 | hsa:4734   | NEDD4   | IPI00009322 | 5.439601 |
| hsa:10783  | NEK6     | IPI00550738 | hsa:64750  | SMURF2  | IPI00329664 | 5.439601 |
| hsa:2041   | EPHA1    | IPI00294250 | hsa:64750  | SMURF2  | IPI00329664 | 5.439601 |
| hsa:283629 | TSSK4    | IPI00646936 | hsa:64750  | SMURF2  | IPI00329664 | 5.439601 |
| hsa:30849  | PIK3R4   | IPI00024006 | hsa:5289   | PIK3C3  | IPI00299755 | 5.439601 |
| hsa:5218   | PFTK1    | IPI00165249 | hsa:57154  | SMURF1  | IPI00217054 | 5.439601 |
| hsa:8814   | CDKL1    | IPI00023527 | hsa:57154  | SMURF1  | IPI00217054 | 5.439601 |
| hsa:140901 | STK35    | IPI00291457 | hsa:57154  | SMURF1  | IPI00217054 | 5.439601 |
| hsa:23678  | SGK3     | IPI00655852 | hsa:83737  | ITCH    | IPI00061780 | 5.439601 |
| hsa:5159   | PDGFRB   | IPI00015902 | hsa:5287   | PIK3C2B | IPI00292056 | 5.439601 |
| hsa:1432   | MAPK14   | IPI00002857 | hsa:4286   | MITF    | IPI00023896 | 5.390596 |
| hsa:1432   | MAPK14   | IPI00002857 | hsa:122953 | JDP2    | IPI00103731 | 5.390596 |
| hsa:1432   | MAPK14   | IPI00002857 | hsa:389692 | MAFA    | IPI00169353 | 5.390596 |
| hsa:1432   | MAPK14   | IPI00002857 | hsa:3726   | JUNB    | IPI00013439 | 5.390596 |
| hsa:1432   | MAPK14   | IPI00002857 | hsa:1385   | CREB1   | IPI00027713 | 5.390596 |
| hsa:1432   | MAPK14   | IPI00002857 | hsa:1649   | DDIT3   | IPI00019956 | 5.390596 |
| hsa:6790   | AURKA    | IPI00298940 | hsa:51199  | NIN     | IPI00441952 | 5.390596 |
| hsa:2261   | FGFR3    | IPI00027174 | hsa:467    | ATF3    | IPI00002502 | 5.390596 |
| hsa:5594   | MAPK1    | IPI00003479 | hsa:3727   | JUND    | IPI00289547 | 5.390596 |
| hsa:5594   | MAPK1    | IPI00003479 | hsa:4286   | MITF    | IPI00023896 | 5.390596 |

|           |              |             |            |        |             |          |
|-----------|--------------|-------------|------------|--------|-------------|----------|
| hsa:5594  | MAPK1        | IPI00003479 | hsa:389692 | MAFA   | IPI00169353 | 5.390596 |
| hsa:5594  | MAPK1        | IPI00003479 | hsa:7175   | TPR    | IPI00742682 | 5.390596 |
| hsa:5594  | MAPK1        | IPI00003479 | hsa:8826   | IQGAP1 | IPI00009342 | 5.390596 |
| hsa:5594  | MAPK1        | IPI00003479 | hsa:1051   | CEBPB  | IPI00289773 | 5.390596 |
| hsa:5594  | MAPK1        | IPI00003479 | hsa:2353   | FOS    | IPI00033008 | 5.390596 |
| hsa:5580  | PRKCD        | IPI00329236 | hsa:4780   | NFE2L2 | IPI00000712 | 5.390596 |
| hsa:5599  | MAPK8        | IPI00024672 | hsa:122953 | JDP2   | IPI00103731 | 5.390596 |
| hsa:5599  | MAPK8        | IPI00024672 | hsa:3727   | JUND   | IPI00289547 | 5.390596 |
| hsa:5599  | MAPK8        | IPI00024672 | hsa:3726   | JUNB   | IPI00013439 | 5.390596 |
| hsa:5595  | MAPK3        | IPI00018195 | hsa:3727   | JUND   | IPI00289547 | 5.390596 |
| hsa:5595  | MAPK3        | IPI00018195 | hsa:1051   | CEBPB  | IPI00289773 | 5.390596 |
| hsa:9252  | RPS6KA5      | IPI00335101 | hsa:1051   | CEBPB  | IPI00289773 | 5.390596 |
| hsa:9252  | RPS6KA5      | IPI00335101 | hsa:1385   | CREB1  | IPI00027713 | 5.390596 |
| hsa:9252  | RPS6KA5      | IPI00335101 | hsa:466    | ATF1   | IPI00002501 | 5.390596 |
| hsa:1956  | EGFR         | IPI00018274 | hsa:1051   | CEBPB  | IPI00289773 | 5.390596 |
| hsa:1956  | EGFR         | IPI00018274 | hsa:3872   | KRT17  | IPI00450768 | 5.390596 |
| hsa:5566  | PRKACA730418 | IPI00396630 | hsa:466    | ATF1   | IPI00002501 | 5.390596 |
| hsa:5566  | PRKACA730418 | IPI00396630 | hsa:51199  | NIN    | IPI00441952 | 5.390596 |
| hsa:5566  | PRKACA730418 | IPI00396630 | hsa:2353   | FOS    | IPI00033008 | 5.390596 |
| hsa:2932  | GSK3B        | IPI00028570 | hsa:51199  | NIN    | IPI00441952 | 5.390596 |
| hsa:2932  | GSK3B        | IPI00028570 | hsa:4286   | MITF   | IPI00023896 | 5.390596 |
| hsa:2932  | GSK3B        | IPI00028570 | hsa:1385   | CREB1  | IPI00027713 | 5.390596 |
| hsa:2048  | EPHB2        | IPI00021275 | hsa:2353   | FOS    | IPI00033008 | 5.390596 |
| hsa:1457  | CSNK2A1      | IPI00744507 | hsa:1649   | DDIT3  | IPI00019956 | 5.390596 |
| hsa:1457  | CSNK2A1      | IPI00744507 | hsa:466    | ATF1   | IPI00002501 | 5.390596 |
| hsa:1457  | CSNK2A1      | IPI00744507 | hsa:2353   | FOS    | IPI00033008 | 5.390596 |
| hsa:1459  | CSNK2A2      | IPI00020602 | hsa:466    | ATF1   | IPI00002501 | 5.390596 |
| hsa:1459  | CSNK2A2      | IPI00020602 | hsa:2353   | FOS    | IPI00033008 | 5.390596 |
| hsa:815   | CAMK2A       | IPI00215715 | hsa:1051   | CEBPB  | IPI00289773 | 5.390596 |
| hsa:5592  | PRKG1        | IPI00436355 | hsa:1385   | CREB1  | IPI00027713 | 5.390596 |
| hsa:207   | AKT1         | IPI00012866 | hsa:1385   | CREB1  | IPI00027713 | 5.390596 |
| hsa:1025  | CDK9         | IPI00301923 | hsa:124790 | HEXIM2 | IPI00180465 | 5.390596 |
| hsa:1613  | DAPK3        | IPI00015213 | hsa:468    | ATF4   | IPI00002503 | 5.390596 |
| hsa:57761 | TRIB3        | IPI00290307 | hsa:468    | ATF4   | IPI00002503 | 5.390596 |
| hsa:6195  | RPS6KA1      | IPI00017305 | hsa:4286   | MITF   | IPI00023896 | 5.390596 |
| hsa:5601  | MAPK9        | IPI00024673 | hsa:122953 | JDP2   | IPI00103731 | 5.390596 |
| hsa:9451  | EIF2AK3      | IPI00303053 | hsa:4780   | NFE2L2 | IPI00000712 | 5.390596 |
| hsa:79696 | C14orf140    | IPI00760585 | hsa:3866   | KRT15  | IPI00290077 | 5.390596 |
| hsa:3551  | IKBKB        | IPI00024709 | hsa:8826   | IQGAP1 | IPI00009342 | 5.390596 |
| hsa:5894  | RAF1         | IPI00021786 | hsa:3880   | KRT19  | IPI00479145 | 5.390596 |
| hsa:11035 | RIPK3        | IPI00294938 | hsa:8826   | IQGAP1 | IPI00009342 | 5.390596 |
| hsa:4215  | MAP3K3       | IPI00017801 | hsa:8826   | IQGAP1 | IPI00009342 | 5.390596 |
| hsa:2932  | GSK3B        | IPI00028570 | hsa:1050   | CEBPA  | IPI00292025 | 5.390596 |
| hsa:1019  | CDK4         | IPI00007811 | hsa:1050   | CEBPA  | IPI00292025 | 5.390596 |
| hsa:1017  | CDK2         | IPI00031681 | hsa:1050   | CEBPA  | IPI00292025 | 5.390596 |
| hsa:5602  | MAPK10       | IPI00023547 | hsa:3725   | JUN    | IPI00008965 | 5.390596 |
| hsa:5600  | MAPK11       | IPI00019473 | hsa:3725   | JUN    | IPI00008965 | 5.390596 |
| hsa:5599  | MAPK8        | IPI00024672 | hsa:3725   | JUN    | IPI00008965 | 5.390596 |
| hsa:25    | ABL129892    | IPI00216969 | hsa:3725   | JUN    | IPI00008965 | 5.390596 |
| hsa:54861 | SNRK         | IPI00470811 | hsa:3725   | JUN    | IPI00008965 | 5.390596 |
| hsa:8550  | MAPKAPK5     | IPI00160672 | hsa:3725   | JUN    | IPI00008965 | 5.390596 |
| hsa:5891  | RAGE         | IPI00413657 | hsa:3725   | JUN    | IPI00008965 | 5.390596 |
| hsa:5587  | PRKD1        | IPI00782950 | hsa:3725   | JUN    | IPI00008965 | 5.390596 |
| hsa:5601  | MAPK9        | IPI00024673 | hsa:3725   | JUN    | IPI00008965 | 5.390596 |
| hsa:5595  | MAPK3        | IPI00018195 | hsa:3725   | JUN    | IPI00008965 | 5.390596 |
| hsa:1457  | CSNK2A1      | IPI00744507 | hsa:3725   | JUN    | IPI00008965 | 5.390596 |
| hsa:5566  | PRKACA730418 | IPI00396630 | hsa:8826   | IQGAP1 | IPI00009342 | 5.390596 |
| hsa:3791  | KDR          | IPI00021396 | hsa:8826   | IQGAP1 | IPI00009342 | 5.390596 |
| hsa:8986  | RPS6KA4      | IPI00022536 | hsa:2353   | FOS    | IPI00033008 | 5.390596 |
| hsa:6885  | MAP3K7       | IPI00295738 | hsa:2353   | FOS    | IPI00033008 | 5.390596 |



|            |              |             |            |              |             |          |
|------------|--------------|-------------|------------|--------------|-------------|----------|
| hsa:6195   | RPS6KA1      | IPI00017305 | hsa:2353   | FOS          | IPI00033008 | 5.390596 |
| hsa:5601   | MAPK9        | IPI00024673 | hsa:3727   | JUND         | IPI00289547 | 5.390596 |
| hsa:8536   | CAMK1        | IPI00028296 | hsa:466    | ATF1         | IPI00002501 | 5.390596 |
| hsa:8986   | RPS6KA4      | IPI00022536 | hsa:466    | ATF1         | IPI00002501 | 5.390596 |
| hsa:818    | CAMK2G       | IPI00334344 | hsa:466    | ATF1         | IPI00002501 | 5.390596 |
| hsa:6195   | RPS6KA1      | IPI00017305 | hsa:1051   | CEBPB        | IPI00289773 | 5.390596 |
| hsa:57761  | TRIB3        | IPI00290307 | hsa:1649   | DDIT3        | IPI00019956 | 5.390596 |
| hsa:6446   | SGK          | IPI00297590 | hsa:1385   | CREB1        | IPI00027713 | 5.390596 |
| hsa:1859   | DYRK1A       | IPI00014344 | hsa:1385   | CREB1        | IPI00027713 | 5.390596 |
| hsa:9261   | MAPKAPK2     | IPI00026054 | hsa:1385   | CREB1        | IPI00027713 | 5.390596 |
| hsa:8986   | RPS6KA4      | IPI00022536 | hsa:1385   | CREB1        | IPI00027713 | 5.390596 |
| hsa:6196   | RPS6KA2      | IPI00300321 | hsa:1385   | CREB1        | IPI00027713 | 5.390596 |
| hsa:6195   | RPS6KA1      | IPI00017305 | hsa:1385   | CREB1        | IPI00027713 | 5.390596 |
| hsa:6197   | RPS6KA3      | IPI00020898 | hsa:1385   | CREB1        | IPI00027713 | 5.390596 |
| hsa:4751   | NEK2         | IPI00021331 | hsa:10403  | NDC80        | IPI00005791 | 5.390596 |
| hsa:57761  | TRIB3        | IPI00290307 | hsa:22809  | ATF5         | IPI00032057 | 5.390596 |
| hsa:283629 | TSSK4        | IPI00646936 | hsa:1385   | CREB1        | IPI00027713 | 5.390596 |
| hsa:53904  | MYO3A        | IPI00185036 | hsa:145781 | Gcom1        | IPI00455420 | 5.390596 |
| hsa:51765  | RP6-213H19.1 | IPI00292827 | hsa:145781 | Gcom1        | IPI00455420 | 5.390596 |
| hsa:2261   | FGFR3        | IPI00027174 | hsa:467    | ATF3         | IPI00002502 | 5.390596 |
| hsa:3927   | LASP1        | IPI00000861 | hsa:7791   | ZYX          | IPI00871311 | 5.384231 |
| hsa:3927   | LASP1        | IPI00000861 | hsa:2275   | FHL3         | IPI00014399 | 5.384231 |
| hsa:6709   | SPTAN1       | IPI00844215 | hsa:26136  | TES          | IPI00024097 | 5.384231 |
| hsa:8853   | DDEF2        | IPI00022058 | hsa:5829   | PXN          | IPI00335634 | 5.384231 |
| hsa:5921   | RASA1        | IPI00026262 | hsa:5829   | PXN          | IPI00335634 | 5.384231 |
| hsa:1398   | CRK          | IPI00004838 | hsa:5829   | PXN          | IPI00335634 | 5.384231 |
| hsa:1399   | CRKL         | IPI00004839 | hsa:5829   | PXN          | IPI00335634 | 5.384231 |
| hsa:1399   | CRKL         | IPI00004839 | hsa:7041   | TGFB1I1      | IPI00761017 | 5.384231 |
| hsa:9564   | BCAR1        | IPI00872386 | hsa:7205   | TRIP6        | IPI00301561 | 5.384231 |
| hsa:23607  | CD2AP        | IPI00412771 | hsa:126374 | WTIP         | IPI00045320 | 5.384231 |
| hsa:8440   | NCK2         | IPI00306531 | hsa:3987   | LIMS1        | IPI00872358 | 5.384231 |
| hsa:4739   | NEDD9        | IPI00031407 | hsa:7205   | TRIP6        | IPI00301561 | 5.384231 |
| hsa:6457   | SH3GL3       | IPI00019172 | hsa:1396   | CRIP1        | IPI00215611 | 5.384231 |
| hsa:4739   | NEDD9        | IPI00031407 | hsa:7791   | ZYX          | IPI00871311 | 5.384231 |
| hsa:10529  | NEBL         | IPI00844035 | hsa:7791   | ZYX          | IPI00871311 | 5.384231 |
| hsa:10451  | VAV3         | IPI00299763 | hsa:7791   | ZYX          | IPI00871311 | 5.384231 |
| hsa:7409   | VAV1         | IPI00011696 | hsa:7791   | ZYX          | IPI00871311 | 5.384231 |
| hsa:9564   | BCAR1        | IPI00872386 | hsa:84962  | JUB          | IPI00063605 | 5.384231 |
| hsa:2885   | GRB2         | IPI00021327 | hsa:84962  | JUB          | IPI00063605 | 5.384231 |
| hsa:6453   | ITSN1        | IPI00304740 | hsa:8543   | LMO4         | IPI00297604 | 5.384231 |
| hsa:4739   | NEDD9        | IPI00031407 | hsa:5829   | PXN          | IPI00335634 | 5.384231 |
| hsa:50807  | DDEF1        | IPI00410303 | hsa:5829   | PXN          | IPI00335634 | 5.384231 |
| hsa:8874   | ARHGFE7      | IPI00449906 | hsa:5829   | PXN          | IPI00335634 | 5.384231 |
| hsa:9564   | BCAR1        | IPI00872386 | hsa:5829   | PXN          | IPI00335634 | 5.384231 |
| hsa:4690   | NCK1         | IPI00028065 | hsa:5829   | PXN          | IPI00335634 | 5.384231 |
| hsa:3927   | LASP1        | IPI00000861 | hsa:2275   | FHL3         | IPI00014399 | 5.384231 |
| hsa:6457   | SH3GL3       | IPI00019172 | hsa:1396   | CRIP1        | IPI00215611 | 5.384231 |
| hsa:7409   | VAV1         | IPI00011696 | hsa:613    | BCR          | IPI00004497 | 5.346402 |
| hsa:5771   | PTPN2        | IPI00219695 | hsa:1020   | CDK5         | IPI00023530 | 5.346045 |
| hsa:5771   | PTPN2        | IPI00219695 | hsa:1956   | EGFR         | IPI00018274 | 5.346045 |
| hsa:5771   | PTPN2        | IPI00219695 | hsa:1017   | CDK2         | IPI00031681 | 5.346045 |
| hsa:5771   | PTPN2        | IPI00219695 | hsa:983    | CDC2         | IPI00073536 | 5.346045 |
| hsa:5782   | PTPN12       | IPI00289082 | hsa:2185   | PTK2B        | IPI00029702 | 5.346045 |
| hsa:11156  | PTP4A3       | IPI00289328 | hsa:1017   | CDK2         | IPI00031681 | 5.346045 |
| hsa:5778   | PTPN7        | IPI00017338 | hsa:1432   | MAPK14       | IPI00002857 | 5.346045 |
| hsa:5778   | PTPN7        | IPI00017338 | hsa:5594   | MAPK1        | IPI00003479 | 5.346045 |
| hsa:5778   | PTPN7        | IPI00017338 | hsa:5595   | MAPK3        | IPI00018195 | 5.346045 |
| hsa:5782   | PTPN12       | IPI00289082 | hsa:5747   | PTK2         | IPI00012885 | 5.346045 |
| hsa:5782   | PTPN12       | IPI00289082 | hsa:5578   | PRKCA        | IPI00385449 | 5.346045 |
| hsa:5782   | PTPN12       | IPI00289082 | hsa:5566   | PRKACA730418 | IPI00396630 | 5.346045 |

|           |           |             |           |              |             |          |
|-----------|-----------|-------------|-----------|--------------|-------------|----------|
| hsa:5778  | PTPN7     | IPI00017338 | hsa:5566  | PRKACA730418 | IPI00396630 | 5.346045 |
| hsa:26469 | PTPN18    | IPI00152019 | hsa:2064  | ERBB2        | IPI00300384 | 5.346045 |
| hsa:207   | AKT1      | IPI00012866 | hsa:79026 | AHNAK        | IPI00021812 | 5.337007 |
| hsa:2885  | GRB2      | IPI00021327 | hsa:9649  | RALGPS1      | IPI00329517 | 5.319262 |
| hsa:5880  | RAC2      | IPI00010270 | hsa:6242  | RTKN         | IPI00029834 | 5.318302 |
| hsa:387   | RHOA      | IPI00478231 | hsa:6242  | RTKN         | IPI00029834 | 5.318302 |
| hsa:389   | RHOC      | IPI00027434 | hsa:6242  | RTKN         | IPI00029834 | 5.318302 |
| hsa:5590  | PRKCZ     | IPI00013749 | hsa:3551  | IKBKB        | IPI00024709 | 5.280978 |
| hsa:5588  | PRKCQ     | IPI00029196 | hsa:1147  | CHUK         | IPI00005104 | 5.280978 |
| hsa:5588  | PRKCQ     | IPI00029196 | hsa:3551  | IKBKB        | IPI00024709 | 5.280978 |
| hsa:54776 | PPP1R12C  | IPI00443045 | hsa:8476  | CDC42BPA     | IPI00640468 | 5.277393 |
| hsa:5792  | PTPRF     | IPI00107831 | hsa:9564  | BCAR1        | IPI00872386 | 5.235701 |
| hsa:355   | FAS       | IPI00744894 | hsa:8737  | RIPK1        | IPI00013773 | 5.234792 |
| hsa:7132  | TNFRSF1A  | IPI00018880 | hsa:1612  | DAPK1        | IPI00745936 | 5.234792 |
| hsa:7132  | TNFRSF1A  | IPI00018880 | hsa:8737  | RIPK1        | IPI00013773 | 5.234792 |
| hsa:8797  | TNFRSF10A | IPI00021975 | hsa:8737  | RIPK1        | IPI00013773 | 5.234792 |
| hsa:958   | CD40      | IPI00018282 | hsa:3718  | JAK3         | IPI00002773 | 5.234792 |
| hsa:8795  | TNFRSF10B | IPI00296379 | hsa:8737  | RIPK1        | IPI00013773 | 5.234792 |
| hsa:65078 | RTN4R     | IPI00289204 | hsa:84894 | LINGO1       | IPI00465325 | 5.219197 |
| hsa:5549  | PRELP     | IPI00020987 | hsa:3339  | HSPG2        | IPI00024284 | 5.219197 |
| hsa:4060  | LUM       | IPI00020986 | hsa:176   | ACAN         | IPI00291932 | 5.219197 |
| hsa:65078 | RTN4R     | IPI00289204 | hsa:4099  | MAG          | IPI00026237 | 5.219197 |
| hsa:5581  | PRKCE     | IPI00024539 | hsa:10611 | PDLIM5       | IPI00007935 | 5.213372 |
| hsa:5578  | PRKCA     | IPI00385449 | hsa:9260  | PDLIM7       | IPI00023122 | 5.213372 |
| hsa:5579  | PRKCB1    | IPI00010466 | hsa:9260  | PDLIM7       | IPI00023122 | 5.213372 |
| hsa:5582  | PRKCG     | IPI00007128 | hsa:10611 | PDLIM5       | IPI00007935 | 5.213372 |
| hsa:5579  | PRKCB1    | IPI00010466 | hsa:10611 | PDLIM5       | IPI00007935 | 5.213372 |
| hsa:5371  | PML       | IPI00022348 | hsa:7048  | TGFBR2       | IPI00020431 | 5.177529 |
| hsa:5371  | PML       | IPI00022348 | hsa:7046  | TGFBR1       | IPI00005733 | 5.177529 |
| hsa:5371  | PML       | IPI00022348 | hsa:6790  | AURKA        | IPI00298940 | 5.177529 |
| hsa:5371  | PML       | IPI00022348 | hsa:1432  | MAPK14       | IPI00002857 | 5.177529 |
| hsa:672   | BRCA1     | IPI00218982 | hsa:1022  | CDK7         | IPI00000685 | 5.177529 |
| hsa:672   | BRCA1     | IPI00218982 | hsa:4215  | MAP3K3       | IPI00017801 | 5.177529 |
| hsa:672   | BRCA1     | IPI00218982 | hsa:25    | ABL129892    | IPI00216969 | 5.177529 |
| hsa:672   | BRCA1     | IPI00218982 | hsa:11200 | CHEK2        | IPI00014072 | 5.177529 |
| hsa:672   | BRCA1     | IPI00218982 | hsa:207   | AKT1         | IPI00012866 | 5.177529 |
| hsa:672   | BRCA1     | IPI00218982 | hsa:3717  | JAK2         | IPI00031016 | 5.177529 |
| hsa:672   | BRCA1     | IPI00218982 | hsa:3716  | JAK1         | IPI00443765 | 5.177529 |
| hsa:672   | BRCA1     | IPI00218982 | hsa:1019  | CDK4         | IPI00007811 | 5.177529 |
| hsa:672   | BRCA1     | IPI00218982 | hsa:1017  | CDK2         | IPI00031681 | 5.177529 |
| hsa:672   | BRCA1     | IPI00218982 | hsa:983   | CDC2         | IPI00073536 | 5.177529 |
| hsa:672   | BRCA1     | IPI00218982 | hsa:1457  | CSNK2A1      | IPI00744507 | 5.177529 |
| hsa:4193  | MDM2      | IPI00025490 | hsa:3480  | IGF1R        | IPI00027232 | 5.177529 |
| hsa:4193  | MDM2      | IPI00025490 | hsa:25    | ABL129892    | IPI00216969 | 5.177529 |
| hsa:4193  | MDM2      | IPI00025490 | hsa:207   | AKT1         | IPI00012866 | 5.177529 |
| hsa:4194  | MDM4      | IPI00005170 | hsa:207   | AKT1         | IPI00012866 | 5.177529 |
| hsa:4194  | MDM4      | IPI00005170 | hsa:1111  | CHEK1        | IPI00023664 | 5.177529 |
| hsa:4194  | MDM4      | IPI00005170 | hsa:11200 | CHEK2        | IPI00014072 | 5.177529 |
| hsa:9169  | SFRS2IP   | IPI00181359 | hsa:6732  | SRPK1        | IPI00290439 | 5.177529 |
| hsa:10425 | ARIH2     | IPI00007304 | hsa:699   | BUB1         | IPI00783305 | 5.177529 |
| hsa:6477  | SIAH1     | IPI00396517 | hsa:10114 | HIPK3        | IPI00099522 | 5.177529 |
| hsa:6478  | SIAH2     | IPI00305283 | hsa:10114 | HIPK3        | IPI00099522 | 5.177529 |
| hsa:331   | BIRC4     | IPI00303890 | hsa:94    | ACVRL1       | IPI00293271 | 5.177529 |
| hsa:331   | BIRC4     | IPI00303890 | hsa:55437 | ALS2CR2      | IPI00032099 | 5.177529 |
| hsa:331   | BIRC4     | IPI00303890 | hsa:6885  | MAP3K7       | IPI00295738 | 5.177529 |
| hsa:1107  | CHD3      | IPI00373870 | hsa:25764 | HYPK         | IPI00335001 | 5.177529 |
| hsa:4194  | MDM4      | IPI00005170 | hsa:1452  | CSNK1A1      | IPI00183400 | 5.177529 |
| hsa:4214  | MAP3K1    | IPI00855985 | hsa:5609  | MAP2K7       | IPI00023636 | 5.177529 |
| hsa:4214  | MAP3K1    | IPI00855985 | hsa:6416  | MAP2K4       | IPI00024674 | 5.177529 |
| hsa:4193  | MDM2      | IPI00025490 | hsa:11200 | CHEK2        | IPI00014072 | 5.177529 |

|           |          |             |           |         |             |          |
|-----------|----------|-------------|-----------|---------|-------------|----------|
| hsa:4214  | MAP3K1   | IPI00855985 | hsa:85366 | MYLK2   | IPI00221127 | 5.177529 |
| hsa:22823 | MTF2     | IPI00291983 | hsa:25865 | PRKD2   | IPI00009334 | 5.177529 |
| hsa:10155 | TRIM28   | IPI00438229 | hsa:5062  | PAK2    | IPI00787208 | 5.177529 |
| hsa:80306 | MED28    | IPI00097532 | hsa:3932  | LCK     | IPI00394952 | 5.177529 |
| hsa:672   | BRCA1    | IPI00218982 | hsa:6790  | AURKA   | IPI00298940 | 5.177529 |
| hsa:6048  | RNF5     | IPI00012608 | hsa:7046  | TGFBR1  | IPI00005733 | 5.177529 |
| hsa:81847 | RNF146   | IPI00008911 | hsa:7046  | TGFBR1  | IPI00005733 | 5.177529 |
| hsa:55819 | RNF130   | IPI00183643 | hsa:7046  | TGFBR1  | IPI00005733 | 5.177529 |
| hsa:55120 | FANCL    | IPI00018099 | hsa:7046  | TGFBR1  | IPI00005733 | 5.177529 |
| hsa:331   | BIRC4    | IPI00303890 | hsa:7046  | TGFBR1  | IPI00005733 | 5.177529 |
| hsa:55819 | RNF130   | IPI00183643 | hsa:2261  | FGFR3   | IPI00027174 | 5.177529 |
| hsa:64207 | C14orf4  | IPI00019205 | hsa:3055  | HCK     | IPI00646510 | 5.177529 |
| hsa:84676 | TRIM63   | IPI00000309 | hsa:7273  | TTN     | IPI00759754 | 5.177529 |
| hsa:8554  | PIAS1    | IPI00220424 | hsa:5747  | PTK2    | IPI00012885 | 5.177529 |
| hsa:55120 | FANCL    | IPI00018099 | hsa:90    | ACVR1   | IPI00029219 | 5.177529 |
| hsa:57820 | CCNB1IP1 | IPI00009603 | hsa:983   | CDC2    | IPI00073536 | 5.177529 |
| hsa:4194  | MDM4     | IPI00005170 | hsa:983   | CDC2    | IPI00073536 | 5.177529 |
| hsa:55120 | FANCL    | IPI00018099 | hsa:658   | BMPRI1B | IPI00010862 | 5.177529 |
| hsa:9616  | RNF7     | IPI00033132 | hsa:1457  | CSNK2A1 | IPI00744507 | 5.177529 |
| hsa:10193 | RNF41    | IPI00024801 | hsa:2066  | ERBB4   | IPI00016371 | 5.177529 |
| hsa:331   | BIRC4    | IPI00303890 | hsa:207   | AKT1    | IPI00012866 | 5.177529 |
| hsa:546   | ATRX     | IPI00297633 | hsa:4750  | NEK1    | IPI00044749 | 5.177529 |
| hsa:84108 | PCGF6    | IPI00102714 | hsa:1022  | CDK7    | IPI00000685 | 5.177529 |
| hsa:4331  | MNAT1    | IPI00294701 | hsa:1022  | CDK7    | IPI00000685 | 5.177529 |
| hsa:90678 | LRSAM1   | IPI00300805 | hsa:2931  | GSK3A   | IPI00292228 | 5.177529 |
| hsa:55823 | VPS11    | IPI00300697 | hsa:4140  | MARK3   | IPI00183118 | 5.177529 |
| hsa:10475 | TRIM38   | IPI00007365 | hsa:8737  | RIPK1   | IPI00013773 | 5.177529 |
| hsa:54476 | RNF216   | IPI00375632 | hsa:8737  | RIPK1   | IPI00013773 | 5.177529 |
| hsa:331   | BIRC4    | IPI00303890 | hsa:208   | AKT2    | IPI00012870 | 5.177529 |
| hsa:51132 | RNF12    | IPI00060628 | hsa:3984  | LIMK1   | IPI00291702 | 5.177529 |
| hsa:84231 | TRAF7    | IPI00395631 | hsa:4215  | MAP3K3  | IPI00017801 | 5.177529 |
| hsa:4193  | MDM2     | IPI00025490 | hsa:156   | ADRBK1  | IPI00012497 | 5.177529 |
| hsa:55658 | RNF126   | IPI00155562 | hsa:4215  | MAP3K3  | IPI00017801 | 5.177529 |
| hsa:10155 | TRIM28   | IPI00438229 | hsa:9641  | IKBKE   | IPI00029045 | 5.177529 |
| hsa:23321 | TRIM2    | IPI00153011 | hsa:23043 | TNIK    | IPI00145805 | 5.177529 |
| hsa:5371  | PML      | IPI00022348 | hsa:1457  | CSNK2A1 | IPI00744507 | 5.177529 |
| hsa:331   | BIRC4    | IPI00303890 | hsa:29110 | TBK1    | IPI00293613 | 5.177529 |
| hsa:10425 | ARIH2    | IPI00007304 | hsa:699   | BUB1    | IPI00783305 | 5.177529 |
| hsa:55819 | RNF130   | IPI00183643 | hsa:2261  | FGFR3   | IPI00027174 | 5.177529 |
| hsa:55823 | VPS11    | IPI00300697 | hsa:4140  | MARK3   | IPI00183118 | 5.177529 |
| hsa:3113  | HLA-DPA1 | IPI00021711 | hsa:920   | CD4     | IPI00003983 | 5.150774 |
| hsa:2017  | CTTN     | IPI00029601 | hsa:8976  | WASL    | IPI00011676 | 5.127839 |
| hsa:23268 | DNMBP    | IPI00174025 | hsa:8976  | WASL    | IPI00011676 | 5.127839 |
| hsa:2885  | GRB2     | IPI00021327 | hsa:8976  | WASL    | IPI00011676 | 5.127839 |
| hsa:11252 | PACSIN2  | IPI00027009 | hsa:8976  | WASL    | IPI00011676 | 5.127839 |
| hsa:3059  | HCLS1    | IPI00026156 | hsa:7454  | WAS     | IPI00001545 | 5.127839 |
| hsa:1739  | DLG1     | IPI00030351 | hsa:7454  | WAS     | IPI00001545 | 5.127839 |
| hsa:9051  | PSTPIP1  | IPI00022606 | hsa:7454  | WAS     | IPI00001545 | 5.127839 |
| hsa:9322  | TRIP10   | IPI00168849 | hsa:7454  | WAS     | IPI00001545 | 5.127839 |
| hsa:2533  | FYB      | IPI00446986 | hsa:7454  | WAS     | IPI00001545 | 5.127839 |
| hsa:1399  | CRKL     | IPI00004839 | hsa:7454  | WAS     | IPI00001545 | 5.127839 |
| hsa:4690  | NCK1     | IPI00028065 | hsa:7454  | WAS     | IPI00001545 | 5.127839 |
| hsa:2885  | GRB2     | IPI00021327 | hsa:7454  | WAS     | IPI00001545 | 5.127839 |
| hsa:29763 | PACSIN3  | IPI00329572 | hsa:8976  | WASL    | IPI00011676 | 5.127839 |
| hsa:6457  | SH3GL3   | IPI00019172 | hsa:8976  | WASL    | IPI00011676 | 5.127839 |
| hsa:29993 | PACSIN1  | IPI00011515 | hsa:8976  | WASL    | IPI00011676 | 5.127839 |
| hsa:54874 | FNBP1L   | IPI00807364 | hsa:8976  | WASL    | IPI00011676 | 5.127839 |
| hsa:51517 | NCKIPSD  | IPI00009319 | hsa:8976  | WASL    | IPI00011676 | 5.127839 |
| hsa:6453  | ITSN1    | IPI00304740 | hsa:8976  | WASL    | IPI00011676 | 5.127839 |
| hsa:4690  | NCK1     | IPI00028065 | hsa:8976  | WASL    | IPI00011676 | 5.127839 |

|           |           |             |            |              |             |          |
|-----------|-----------|-------------|------------|--------------|-------------|----------|
| hsa:1398  | CRK       | IPI00004838 | hsa:8976   | WASL         | IPI00011676 | 5.127839 |
| hsa:2885  | GRB2      | IPI00021327 | hsa:8631   | SKAP1        | IPI00289536 | 5.1158   |
| hsa:3055  | HCK       | IPI00646510 | hsa:1796   | DOK1         | IPI00015287 | 5.096015 |
| hsa:3055  | HCK       | IPI00646510 | hsa:1785   | DNM2         | IPI00033022 | 5.096015 |
| hsa:3932  | LCK       | IPI00394952 | hsa:9846   | GAB2         | IPI00186990 | 5.096015 |
| hsa:3932  | LCK       | IPI00394952 | hsa:79930  | DOK3         | IPI00156649 | 5.096015 |
| hsa:3932  | LCK       | IPI00394952 | hsa:9046   | DOK2         | IPI00022602 | 5.096015 |
| hsa:3932  | LCK       | IPI00394952 | hsa:1796   | DOK1         | IPI00015287 | 5.096015 |
| hsa:3932  | LCK       | IPI00394952 | hsa:5338   | PLD2         | IPI00024727 | 5.096015 |
| hsa:6714  | SRC       | IPI00641230 | hsa:84632  | AFAP1L2      | IPI00181905 | 5.096015 |
| hsa:6714  | SRC       | IPI00641230 | hsa:1796   | DOK1         | IPI00015287 | 5.096015 |
| hsa:6714  | SRC       | IPI00641230 | hsa:55715  | DOK4         | IPI00550728 | 5.096015 |
| hsa:6714  | SRC       | IPI00641230 | hsa:139716 | GAB3         | IPI00103456 | 5.096015 |
| hsa:6714  | SRC       | IPI00641230 | hsa:9846   | GAB2         | IPI00186990 | 5.096015 |
| hsa:6714  | SRC       | IPI00641230 | hsa:1759   | DNM1         | IPI00873844 | 5.096015 |
| hsa:25    | ABL129892 | IPI00216969 | hsa:79930  | DOK3         | IPI00156649 | 5.096015 |
| hsa:25    | ABL129892 | IPI00216969 | hsa:1796   | DOK1         | IPI00015287 | 5.096015 |
| hsa:4067  | LYN       | IPI00298625 | hsa:1796   | DOK1         | IPI00015287 | 5.096015 |
| hsa:4067  | LYN       | IPI00298625 | hsa:79930  | DOK3         | IPI00156649 | 5.096015 |
| hsa:4067  | LYN       | IPI00298625 | hsa:139716 | GAB3         | IPI00103456 | 5.096015 |
| hsa:4067  | LYN       | IPI00298625 | hsa:9846   | GAB2         | IPI00186990 | 5.096015 |
| hsa:2534  | FYN       | IPI00219012 | hsa:1796   | DOK1         | IPI00015287 | 5.096015 |
| hsa:2534  | FYN       | IPI00219012 | hsa:79930  | DOK3         | IPI00156649 | 5.096015 |
| hsa:2534  | FYN       | IPI00219012 | hsa:55715  | DOK4         | IPI00550728 | 5.096015 |
| hsa:2534  | FYN       | IPI00219012 | hsa:139716 | GAB3         | IPI00103456 | 5.096015 |
| hsa:1445  | CSK       | IPI00013212 | hsa:1796   | DOK1         | IPI00015287 | 5.096015 |
| hsa:1445  | CSK       | IPI00013212 | hsa:79930  | DOK3         | IPI00156649 | 5.096015 |
| hsa:2268  | FGR       | IPI00016871 | hsa:1796   | DOK1         | IPI00015287 | 5.096015 |
| hsa:7525  | YES1      | IPI00013981 | hsa:1796   | DOK1         | IPI00015287 | 5.096015 |
| hsa:6714  | SRC       | IPI00641230 | hsa:1785   | DNM2         | IPI00033022 | 5.096015 |
| hsa:6714  | SRC       | IPI00641230 | hsa:60312  | AFAP1        | IPI00444138 | 5.096015 |
| hsa:1445  | CSK       | IPI00013212 | hsa:5338   | PLD2         | IPI00024727 | 5.096015 |
| hsa:2534  | FYN       | IPI00219012 | hsa:5338   | PLD2         | IPI00024727 | 5.096015 |
| hsa:2534  | FYN       | IPI00219012 | hsa:3667   | IRS1         | IPI00019471 | 5.096015 |
| hsa:5770  | PTPN1     | IPI00297261 | hsa:4914   | NTRK1        | IPI00025076 | 5.090737 |
| hsa:5770  | PTPN1     | IPI00297261 | hsa:4058   | LTK          | IPI00021365 | 5.090737 |
| hsa:5770  | PTPN1     | IPI00297261 | hsa:207    | AKT1         | IPI00012866 | 5.090737 |
| hsa:5728  | PTEN      | IPI00012587 | hsa:6794   | STK11        | IPI00219072 | 5.090737 |
| hsa:1033  | CDKN3     | IPI00003445 | hsa:1018   | CDK3         | IPI00023503 | 5.090737 |
| hsa:51207 | DUSP13    | IPI00008928 | hsa:7046   | TGFBR1       | IPI00005733 | 5.090737 |
| hsa:5791  | PTPRE     | IPI00334825 | hsa:5594   | MAPK1        | IPI00003479 | 5.090737 |
| hsa:5770  | PTPN1     | IPI00297261 | hsa:5594   | MAPK1        | IPI00003479 | 5.090737 |
| hsa:5801  | PTPRR     | IPI00033560 | hsa:5594   | MAPK1        | IPI00003479 | 5.090737 |
| hsa:84867 | PTPN5     | IPI00008837 | hsa:5594   | MAPK1        | IPI00003479 | 5.090737 |
| hsa:5786  | PTPRA     | IPI00221067 | hsa:5580   | PRKCD        | IPI00329236 | 5.090737 |
| hsa:5791  | PTPRE     | IPI00334825 | hsa:5595   | MAPK3        | IPI00018195 | 5.090737 |
| hsa:5801  | PTPRR     | IPI00033560 | hsa:5595   | MAPK3        | IPI00018195 | 5.090737 |
| hsa:84867 | PTPN5     | IPI00008837 | hsa:5595   | MAPK3        | IPI00018195 | 5.090737 |
| hsa:5770  | PTPN1     | IPI00297261 | hsa:1956   | EGFR         | IPI00018274 | 5.090737 |
| hsa:51207 | DUSP13    | IPI00008928 | hsa:90     | ACVR1        | IPI00029219 | 5.090737 |
| hsa:5770  | PTPN1     | IPI00297261 | hsa:983    | CDC2         | IPI00073536 | 5.090737 |
| hsa:1033  | CDKN3     | IPI00003445 | hsa:983    | CDC2         | IPI00073536 | 5.090737 |
| hsa:5801  | PTPRR     | IPI00033560 | hsa:5566   | PRKACA730418 | IPI00396630 | 5.090737 |
| hsa:5770  | PTPN1     | IPI00297261 | hsa:2932   | GSK3B        | IPI00028570 | 5.090737 |
| hsa:5770  | PTPN1     | IPI00297261 | hsa:1457   | CSNK2A1      | IPI00744507 | 5.090737 |
| hsa:5728  | PTEN      | IPI00012587 | hsa:1457   | CSNK2A1      | IPI00744507 | 5.090737 |
| hsa:5728  | PTEN      | IPI00012587 | hsa:1459   | CSNK2A2      | IPI00020602 | 5.090737 |
| hsa:5770  | PTPN1     | IPI00297261 | hsa:1459   | CSNK2A2      | IPI00020602 | 5.090737 |
| hsa:5728  | PTEN      | IPI00012587 | hsa:207    | AKT1         | IPI00012866 | 5.090737 |
| hsa:1033  | CDKN3     | IPI00003445 | hsa:1017   | CDK2         | IPI00031681 | 5.090737 |

|           |              |             |           |         |             |          |
|-----------|--------------|-------------|-----------|---------|-------------|----------|
| hsa:5801  | PTPRR        | IPI00033560 | hsa:5598  | MAPK7   | IPI00376860 | 5.090737 |
| hsa:3055  | HCK          | IPI00646510 | hsa:50807 | DDEF1   | IPI00410303 | 5.086216 |
| hsa:6714  | SRC          | IPI00641230 | hsa:50807 | DDEF1   | IPI00410303 | 5.086216 |
| hsa:3118  | HLA-DQA2     | IPI00005172 | hsa:920   | CD4     | IPI00003983 | 5.079876 |
| hsa:5581  | PRKCE        | IPI00024539 | hsa:2915  | GRM5    | IPI00220277 | 5.040557 |
| hsa:5581  | PRKCE        | IPI00024539 | hsa:2906  | GRIN2D  | IPI00006217 | 5.040557 |
| hsa:5580  | PRKCD        | IPI00329236 | hsa:2915  | GRM5    | IPI00220277 | 5.040557 |
| hsa:6714  | SRC          | IPI00641230 | hsa:2903  | GRIN2A  | IPI00029768 | 5.040557 |
| hsa:6714  | SRC          | IPI00641230 | hsa:2904  | GRIN2B  | IPI00297933 | 5.040557 |
| hsa:1020  | CDK5         | IPI00023530 | hsa:2903  | GRIN2A  | IPI00029768 | 5.040557 |
| hsa:25    | ABL129892    | IPI00216969 | hsa:2906  | GRIN2D  | IPI00006217 | 5.040557 |
| hsa:156   | ADRBK1       | IPI00012497 | hsa:2911  | GRM1    | IPI00012363 | 5.040557 |
| hsa:5578  | PRKCA        | IPI00385449 | hsa:2915  | GRM5    | IPI00220277 | 5.040557 |
| hsa:5578  | PRKCA        | IPI00385449 | hsa:2911  | GRM1    | IPI00012363 | 5.040557 |
| hsa:5578  | PRKCA        | IPI00385449 | hsa:2891  | GRIA2   | IPI00030882 | 5.040557 |
| hsa:5578  | PRKCA        | IPI00385449 | hsa:2890  | GRIA1   | IPI00030880 | 5.040557 |
| hsa:5578  | PRKCA        | IPI00385449 | hsa:2893  | GRIA4   | IPI00007632 | 5.040557 |
| hsa:4067  | LYN          | IPI00298625 | hsa:2892  | GRIA3   | IPI00298700 | 5.040557 |
| hsa:5566  | PRKACA730418 | IPI00396630 | hsa:2893  | GRIA4   | IPI00007632 | 5.040557 |
| hsa:5566  | PRKACA730418 | IPI00396630 | hsa:2890  | GRIA1   | IPI00030880 | 5.040557 |
| hsa:5590  | PRKCZ        | IPI00013749 | hsa:2915  | GRM5    | IPI00220277 | 5.040557 |
| hsa:5579  | PRKCB1       | IPI00010466 | hsa:2915  | GRM5    | IPI00220277 | 5.040557 |
| hsa:5579  | PRKCB1       | IPI00010466 | hsa:2906  | GRIN2D  | IPI00006217 | 5.040557 |
| hsa:818   | CAMK2G       | IPI00334344 | hsa:2893  | GRIA4   | IPI00007632 | 5.040557 |
| hsa:818   | CAMK2G       | IPI00334344 | hsa:2890  | GRIA1   | IPI00030880 | 5.040557 |
| hsa:5582  | PRKCG        | IPI00007128 | hsa:2893  | GRIA4   | IPI00007632 | 5.040557 |
| hsa:816   | CAMK2B       | IPI00334271 | hsa:94032 | CAMK2N2 | IPI00045539 | 5.040557 |
| hsa:815   | CAMK2A       | IPI00215715 | hsa:2893  | GRIA4   | IPI00007632 | 5.040557 |
| hsa:2066  | ERBB4        | IPI00016371 | hsa:2902  | GRIN1   | IPI00013915 | 5.040557 |
| hsa:11113 | CIT          | IPI00022465 | hsa:2902  | GRIN1   | IPI00013915 | 5.040557 |
| hsa:815   | CAMK2A       | IPI00215715 | hsa:2902  | GRIN1   | IPI00013915 | 5.040557 |
| hsa:5605  | MAP2K2       | IPI00003783 | hsa:2902  | GRIN1   | IPI00013915 | 5.040557 |
| hsa:2048  | EPHB2        | IPI00021275 | hsa:2902  | GRIN1   | IPI00013915 | 5.040557 |
| hsa:2050  | EPHB4        | IPI00289342 | hsa:2902  | GRIN1   | IPI00013915 | 5.040557 |
| hsa:6197  | RPS6KA3      | IPI00020898 | hsa:2902  | GRIN1   | IPI00013915 | 5.040557 |
| hsa:5582  | PRKCG        | IPI00007128 | hsa:2902  | GRIN1   | IPI00013915 | 5.040557 |
| hsa:5581  | PRKCE        | IPI00024539 | hsa:2902  | GRIN1   | IPI00013915 | 5.040557 |
| hsa:5579  | PRKCB1       | IPI00010466 | hsa:2902  | GRIN1   | IPI00013915 | 5.040557 |
| hsa:8573  | CASK         | IPI00514301 | hsa:2903  | GRIN2A  | IPI00029768 | 5.040557 |
| hsa:816   | CAMK2B       | IPI00334271 | hsa:2903  | GRIN2A  | IPI00029768 | 5.040557 |
| hsa:815   | CAMK2A       | IPI00215715 | hsa:2903  | GRIN2A  | IPI00029768 | 5.040557 |
| hsa:2185  | PTK2B        | IPI00029702 | hsa:2903  | GRIN2A  | IPI00029768 | 5.040557 |
| hsa:5578  | PRKCA        | IPI00385449 | hsa:2903  | GRIN2A  | IPI00029768 | 5.040557 |
| hsa:2534  | FYN          | IPI00219012 | hsa:2903  | GRIN2A  | IPI00029768 | 5.040557 |
| hsa:815   | CAMK2A       | IPI00215715 | hsa:2904  | GRIN2B  | IPI00297933 | 5.040557 |
| hsa:816   | CAMK2B       | IPI00334271 | hsa:2904  | GRIN2B  | IPI00297933 | 5.040557 |
| hsa:818   | CAMK2G       | IPI00334344 | hsa:2904  | GRIN2B  | IPI00297933 | 5.040557 |
| hsa:817   | CAMK2D       | IPI00430291 | hsa:2904  | GRIN2B  | IPI00297933 | 5.040557 |
| hsa:2048  | EPHB2        | IPI00021275 | hsa:2904  | GRIN2B  | IPI00297933 | 5.040557 |
| hsa:5582  | PRKCG        | IPI00007128 | hsa:2904  | GRIN2B  | IPI00297933 | 5.040557 |
| hsa:5579  | PRKCB1       | IPI00010466 | hsa:2904  | GRIN2B  | IPI00297933 | 5.040557 |
| hsa:5578  | PRKCA        | IPI00385449 | hsa:2904  | GRIN2B  | IPI00297933 | 5.040557 |
| hsa:2534  | FYN          | IPI00219012 | hsa:2904  | GRIN2B  | IPI00297933 | 5.040557 |
| hsa:5588  | PRKCQ        | IPI00029196 | hsa:2915  | GRM5    | IPI00220277 | 5.040557 |
| hsa:5582  | PRKCG        | IPI00007128 | hsa:2915  | GRM5    | IPI00220277 | 5.040557 |
| hsa:5562  | PRKAA1       | IPI00872804 | hsa:2898  | GRIK2   | IPI00011396 | 5.040557 |
| hsa:8573  | CASK         | IPI00514301 | hsa:2898  | GRIK2   | IPI00011396 | 5.040557 |
| hsa:11113 | CIT          | IPI00022465 | hsa:2906  | GRIN2D  | IPI00006217 | 5.040557 |
| hsa:5605  | MAP2K2       | IPI00003783 | hsa:2906  | GRIN2D  | IPI00006217 | 5.040557 |
| hsa:6197  | RPS6KA3      | IPI00020898 | hsa:2906  | GRIN2D  | IPI00006217 | 5.040557 |

|            |              |             |           |         |             |          |
|------------|--------------|-------------|-----------|---------|-------------|----------|
| hsa:5582   | PRKCG        | IPI00007128 | hsa:2906  | GRIN2D  | IPI00006217 | 5.040557 |
| hsa:1612   | DAPK1        | IPI00745936 | hsa:57534 | MIB1    | IPI00183054 | 5.02935  |
| hsa:5774   | PTPN3        | IPI00289649 | hsa:7535  | ZAP70   | IPI00329789 | 5.023523 |
| hsa:5588   | PRKCQ        | IPI00029196 | hsa:84433 | CARD11  | IPI00869011 | 4.997629 |
| hsa:6709   | SPTAN1       | IPI00844215 | hsa:10006 | ABI1    | IPI00431025 | 4.935545 |
| hsa:6708   | SPTA1        | IPI00220741 | hsa:10006 | ABI1    | IPI00431025 | 4.935545 |
| hsa:9564   | BCAR1        | IPI00872386 | hsa:10278 | EFS     | IPI00011652 | 4.935545 |
| hsa:9564   | BCAR1        | IPI00872386 | hsa:2533  | FYB     | IPI00446986 | 4.935545 |
| hsa:9564   | BCAR1        | IPI00872386 | hsa:4739  | NEDD9   | IPI00031407 | 4.935545 |
| hsa:9564   | BCAR1        | IPI00872386 | hsa:23607 | CD2AP   | IPI00412771 | 4.935545 |
| hsa:9564   | BCAR1        | IPI00872386 | hsa:4867  | NPHP1   | IPI00028739 | 4.935545 |
| hsa:8615   | USO1         | IPI00031583 | hsa:5335  | PLCG1   | IPI00016736 | 4.935545 |
| hsa:9564   | BCAR1        | IPI00872386 | hsa:1793  | DOCK1   | IPI00015286 | 4.935545 |
| hsa:3856   | KRT8         | IPI00554648 | hsa:7082  | TJP1    | IPI00216219 | 4.935545 |
| hsa:6709   | SPTAN1       | IPI00844215 | hsa:7082  | TJP1    | IPI00216219 | 4.935545 |
| hsa:3848   | KRT1         | IPI00220327 | hsa:7082  | TJP1    | IPI00216219 | 4.935545 |
| hsa:1832   | DSP          | IPI00013933 | hsa:9051  | PSTPIP1 | IPI00022606 | 4.935545 |
| hsa:9564   | BCAR1        | IPI00872386 | hsa:10278 | EFS     | IPI00011652 | 4.935545 |
| hsa:3135   | HLA-G        | IPI00015988 | hsa:925   | CD8A    | IPI00438278 | 4.933941 |
| hsa:5580   | PRKCD        | IPI00329236 | hsa:5894  | RAF1    | IPI00021786 | 4.932782 |
| hsa:5566   | PRKACA730418 | IPI00396630 | hsa:5894  | RAF1    | IPI00021786 | 4.932782 |
| hsa:5566   | PRKACA730418 | IPI00396630 | hsa:673   | BRAF    | IPI00303797 | 4.932782 |
| hsa:5590   | PRKCZ        | IPI00013749 | hsa:5894  | RAF1    | IPI00021786 | 4.932782 |
| hsa:6446   | SGK          | IPI00297590 | hsa:673   | BRAF    | IPI00303797 | 4.932782 |
| hsa:1760   | DMPK         | IPI00305254 | hsa:5894  | RAF1    | IPI00021786 | 4.932782 |
| hsa:6196   | RPS6KA2      | IPI00300321 | hsa:673   | BRAF    | IPI00303797 | 4.932782 |
| hsa:920    | CD4          | IPI00003983 | hsa:914   | CD2     | IPI00027484 | 4.92894  |
| hsa:3107   | HLA-C3106    | IPI00004657 | hsa:925   | CD8A    | IPI00438278 | 4.883891 |
| hsa:3105   | HLA-A        | IPI00472882 | hsa:925   | CD8A    | IPI00438278 | 4.883891 |
| hsa:3106   | HLA-B        | unknown     | hsa:925   | CD8A    | IPI00438278 | 4.883891 |
| hsa:3133   | HLA-E        | IPI00830076 | hsa:925   | CD8A    | IPI00438278 | 4.883891 |
| hsa:6714   | SRC          | IPI00641230 | hsa:7205  | TRIP6   | IPI00301561 | 4.873425 |
| hsa:5590   | PRKCZ        | IPI00013749 | hsa:84612 | PARD6B  | IPI00019025 | 4.841703 |
| hsa:5590   | PRKCZ        | IPI00013749 | hsa:84552 | PARD6G  | IPI00032555 | 4.841703 |
| hsa:5590   | PRKCZ        | IPI00013749 | hsa:50855 | PARD6A  | IPI00027217 | 4.841703 |
| hsa:5584   | PRKCI        | IPI00016639 | hsa:84612 | PARD6B  | IPI00019025 | 4.841703 |
| hsa:5584   | PRKCI        | IPI00016639 | hsa:84552 | PARD6G  | IPI00032555 | 4.841703 |
| hsa:5584   | PRKCI        | IPI00016639 | hsa:50855 | PARD6A  | IPI00027217 | 4.841703 |
| hsa:5584   | PRKCI        | IPI00016639 | hsa:50855 | PARD6A  | IPI00027217 | 4.841703 |
| hsa:5590   | PRKCZ        | IPI00013749 | hsa:50855 | PARD6A  | IPI00027217 | 4.841703 |
| hsa:5913   | RAPSN        | IPI00828059 | hsa:4593  | MUSK    | IPI00655599 | 4.794008 |
| hsa:673    | BRAF         | IPI00303797 | hsa:5605  | MAP2K2  | IPI00003783 | 4.741274 |
| hsa:5894   | RAF1         | IPI00021786 | hsa:5605  | MAP2K2  | IPI00003783 | 4.741274 |
| hsa:369    | ARAF         | IPI00872240 | hsa:5605  | MAP2K2  | IPI00003783 | 4.741274 |
| hsa:369    | ARAF         | IPI00872240 | hsa:5604  | MAP2K1  | IPI00219604 | 4.741274 |
| hsa:5894   | RAF1         | IPI00021786 | hsa:5604  | MAP2K1  | IPI00219604 | 4.741274 |
| hsa:673    | BRAF         | IPI00303797 | hsa:5604  | MAP2K1  | IPI00219604 | 4.741274 |
| hsa:1794   | DOCK2        | IPI00022449 | hsa:7409  | VAV1    | IPI00011696 | 4.739646 |
| hsa:3055   | HCK          | IPI00646510 | hsa:6654  | SOS1    | IPI00020131 | 4.71998  |
| hsa:25     | ABL129892    | IPI00216969 | hsa:6655  | SOS2    | IPI00020134 | 4.71998  |
| hsa:2534   | FYN          | IPI00219012 | hsa:6654  | SOS1    | IPI00020131 | 4.71998  |
| hsa:9863   | MAGI2        | IPI00376306 | hsa:5728  | PTEN    | IPI00012587 | 4.711202 |
| hsa:4842   | NOS1         | IPI00217225 | hsa:5798  | PTPRN   | IPI00004440 | 4.711202 |
| hsa:4842   | NOS1         | IPI00217225 | hsa:5777  | PTPN6   | IPI00218604 | 4.711202 |
| hsa:8572   | PDLIM4       | IPI00032206 | hsa:5783  | PTPN13  | IPI00030246 | 4.711202 |
| hsa:6645   | SNTB2        | IPI00009505 | hsa:5798  | PTPRN   | IPI00004440 | 4.711202 |
| hsa:260425 | MAGI3        | IPI00514954 | hsa:5787  | PTPRB   | IPI00295577 | 4.711202 |
| hsa:9368   | SLC9A3R1     | IPI00003527 | hsa:5728  | PTEN    | IPI00012587 | 4.711202 |
| hsa:260425 | MAGI3        | IPI00514954 | hsa:5728  | PTEN    | IPI00012587 | 4.711202 |
| hsa:6386   | SDCBP        | IPI00299086 | hsa:5795  | PTPRJ   | IPI00847732 | 4.711202 |

|            |          |             |            |         |             |          |
|------------|----------|-------------|------------|---------|-------------|----------|
| hsa:51735  | RAPGEF6  | IPI00337694 | hsa:5783   | PTPN13  | IPI00030246 | 4.711202 |
| hsa:9351   | SLC9A3R2 | IPI00385034 | hsa:5728   | PTEN    | IPI00012587 | 4.711202 |
| hsa:1844   | DUSP2    | IPI00016729 | hsa:1432   | MAPK14  | IPI00002857 | 4.675648 |
| hsa:1846   | DUSP4    | IPI00011860 | hsa:1432   | MAPK14  | IPI00002857 | 4.675648 |
| hsa:1843   | DUSP1    | IPI00003928 | hsa:1432   | MAPK14  | IPI00002857 | 4.675648 |
| hsa:1844   | DUSP2    | IPI00016729 | hsa:5594   | MAPK1   | IPI00003479 | 4.675648 |
| hsa:1847   | DUSP5    | IPI00003478 | hsa:5594   | MAPK1   | IPI00003479 | 4.675648 |
| hsa:1846   | DUSP4    | IPI00011860 | hsa:5594   | MAPK1   | IPI00003479 | 4.675648 |
| hsa:1843   | DUSP1    | IPI00003928 | hsa:5594   | MAPK1   | IPI00003479 | 4.675648 |
| hsa:1846   | DUSP4    | IPI00011860 | hsa:5599   | MAPK8   | IPI00024672 | 4.675648 |
| hsa:1843   | DUSP1    | IPI00003928 | hsa:5599   | MAPK8   | IPI00024672 | 4.675648 |
| hsa:1843   | DUSP1    | IPI00003928 | hsa:5595   | MAPK3   | IPI00018195 | 4.675648 |
| hsa:1847   | DUSP5    | IPI00003478 | hsa:5595   | MAPK3   | IPI00018195 | 4.675648 |
| hsa:1846   | DUSP4    | IPI00011860 | hsa:5595   | MAPK3   | IPI00018195 | 4.675648 |
| hsa:1843   | DUSP1    | IPI00003928 | hsa:6300   | MAPK12  | IPI00296283 | 4.675648 |
| hsa:1846   | DUSP4    | IPI00011860 | hsa:5601   | MAPK9   | IPI00024673 | 4.675648 |
| hsa:2885   | GRB2     | IPI00021327 | hsa:2889   | RAPGEF1 | IPI00394743 | 4.661348 |
| hsa:1398   | CRK      | IPI00004838 | hsa:2889   | RAPGEF1 | IPI00394743 | 4.661348 |
| hsa:1399   | CRKL     | IPI00004839 | hsa:2889   | RAPGEF1 | IPI00394743 | 4.661348 |
| hsa:4739   | NEDD9    | IPI00031407 | hsa:2889   | RAPGEF1 | IPI00394743 | 4.661348 |
| hsa:9564   | BCAR1    | IPI00872386 | hsa:2889   | RAPGEF1 | IPI00394743 | 4.661348 |
| hsa:5771   | PTPN2    | IPI00219695 | hsa:3643   | INSR    | IPI00220325 | 4.651753 |
| hsa:5782   | PTPN12   | IPI00289082 | hsa:3643   | INSR    | IPI00220325 | 4.651753 |
| hsa:5770   | PTPN1    | IPI00297261 | hsa:3643   | INSR    | IPI00220325 | 4.633845 |
| hsa:5770   | PTPN1    | IPI00297261 | hsa:3480   | IGF1R   | IPI00027232 | 4.633845 |
| hsa:6585   | SLIT1    | IPI00296434 | hsa:6091   | ROB01   | IPI00219798 | 4.616721 |
| hsa:9353   | SLIT2    | IPI00006288 | hsa:6091   | ROB01   | IPI00219798 | 4.616721 |
| hsa:9353   | SLIT2    | IPI00006288 | hsa:6092   | ROB02   | IPI00830091 | 4.616721 |
| hsa:6586   | SLIT3    | IPI00017640 | hsa:6092   | ROB02   | IPI00830091 | 4.616721 |
| hsa:5579   | PRKCB1   | IPI00010466 | hsa:84433  | CARD11  | IPI00869011 | 4.611942 |
| hsa:3717   | JAK2     | IPI00031016 | hsa:6464   | SHC1    | IPI00645103 | 4.585202 |
| hsa:6850   | SYK      | IPI00018597 | hsa:6464   | SHC1    | IPI00645103 | 4.585202 |
| hsa:7535   | ZAP70    | IPI00329789 | hsa:6464   | SHC1    | IPI00645103 | 4.585202 |
| hsa:1845   | DUSP3    | IPI00018671 | hsa:5605   | MAP2K2  | IPI00003783 | 4.580121 |
| hsa:1845   | DUSP3    | IPI00018671 | hsa:7535   | ZAP70   | IPI00329789 | 4.580121 |
| hsa:56940  | DUSP22   | IPI00024617 | hsa:1432   | MAPK14  | IPI00002857 | 4.580121 |
| hsa:1845   | DUSP3    | IPI00018671 | hsa:5594   | MAPK1   | IPI00003479 | 4.580121 |
| hsa:1845   | DUSP3    | IPI00018671 | hsa:6850   | SYK     | IPI00018597 | 4.580121 |
| hsa:56940  | DUSP22   | IPI00024617 | hsa:5599   | MAPK8   | IPI00024672 | 4.580121 |
| hsa:1845   | DUSP3    | IPI00018671 | hsa:5595   | MAPK3   | IPI00018195 | 4.580121 |
| hsa:56940  | DUSP22   | IPI00024617 | hsa:6416   | MAP2K4  | IPI00024674 | 4.580121 |
| hsa:142679 | DUSP19   | IPI00102808 | hsa:4217   | MAP3K5  | IPI00412433 | 4.580121 |
| hsa:142679 | DUSP19   | IPI00102808 | hsa:5601   | MAPK9   | IPI00024673 | 4.580121 |
| hsa:56940  | DUSP22   | IPI00024617 | hsa:5609   | MAP2K7  | IPI00023636 | 4.580121 |
| hsa:142679 | DUSP19   | IPI00102808 | hsa:5609   | MAP2K7  | IPI00023636 | 4.580121 |
| hsa:4217   | MAP3K5   | IPI00412433 | hsa:153090 | DAB2IP  | IPI00789361 | 4.578506 |
| hsa:5159   | PDGFRB   | IPI00015902 | hsa:8831   | SYNGAP1 | IPI00177884 | 4.578506 |
| hsa:815    | CAMK2A   | IPI00215715 | hsa:8831   | SYNGAP1 | IPI00177884 | 4.578506 |
| hsa:3791   | KDR      | IPI00021396 | hsa:8831   | SYNGAP1 | IPI00177884 | 4.578506 |
| hsa:8408   | ULK1     | IPI00289357 | hsa:8831   | SYNGAP1 | IPI00177884 | 4.578506 |
| hsa:9706   | ULK2     | IPI00479399 | hsa:8831   | SYNGAP1 | IPI00177884 | 4.578506 |
| hsa:695    | BTK      | IPI00029132 | hsa:6776   | STAT5A  | IPI00030783 | 4.571218 |
| hsa:7704   | ZBTB16   | IPI00305613 | hsa:5987   | TRIM27  | IPI00426252 | 4.506367 |
| hsa:7704   | ZBTB16   | IPI00305613 | hsa:648    | BMI1    | IPI00017299 | 4.506367 |
| hsa:6667   | SP1      | IPI00465152 | hsa:1958   | EGR1    | IPI00030227 | 4.506367 |
| hsa:10320  | IKZF1    | IPI00013232 | hsa:64375  | IKZF4   | IPI00064241 | 4.506367 |
| hsa:25888  | ZNF473   | IPI00297388 | hsa:90933  | TRIM41  | IPI00414021 | 4.506367 |
| hsa:59348  | ZNF350   | IPI00478374 | hsa:26994  | RNF11   | IPI00003894 | 4.506367 |
| hsa:10524  | HTATIP   | IPI00290020 | hsa:648    | BMI1    | IPI00017299 | 4.506367 |
| hsa:4150   | MAZ      | IPI00869267 | hsa:2186   | BPTF    | IPI00785110 | 4.506367 |

|            |         |             |           |        |             |          |
|------------|---------|-------------|-----------|--------|-------------|----------|
| hsa:22806  | IKZF3   | IPI00018923 | hsa:64375 | IKZF4  | IPI00064241 | 4.506367 |
| hsa:64376  | IKZF5   | IPI00872098 | hsa:64375 | IKZF4  | IPI00064241 | 4.506367 |
| hsa:8517   | IKBKG   | IPI00002411 | hsa:26994 | RNF11  | IPI00003894 | 4.506367 |
| hsa:10133  | OPTN    | IPI00304189 | hsa:26994 | RNF11  | IPI00003894 | 4.506367 |
| hsa:26036  | ZNF451  | IPI00000725 | hsa:9810  | RNF40  | IPI00162563 | 4.506367 |
| hsa:10127  | ZNF263  | IPI00298951 | hsa:90933 | TRIM41 | IPI00414021 | 4.506367 |
| hsa:23598  | PATZ1   | IPI00003801 | hsa:6047  | RNF4   | IPI00297694 | 4.506367 |
| hsa:49854  | ZNF295  | IPI00008137 | hsa:7541  | ZFP161 | IPI00307325 | 4.506367 |
| hsa:8328   | GFI1B   | IPI00003110 | hsa:55072 | RNF31  | IPI00094740 | 4.506367 |
| hsa:8328   | GFI1B   | IPI00003110 | hsa:84133 | ZNRF3  | IPI00853368 | 4.506367 |
| hsa:58525  | WIZ     | IPI00295502 | hsa:79813 | EHMT1  | IPI00015526 | 4.506367 |
| hsa:653121 | ZBTB8   | unknown     | hsa:90933 | TRIM41 | IPI00414021 | 4.506367 |
| hsa:8517   | IKBKG   | IPI00002411 | hsa:10155 | TRIM28 | IPI00438229 | 4.506367 |
| hsa:57473  | ZNF512B | IPI00074893 | hsa:9618  | TRAF4  | IPI00162088 | 4.506367 |
| hsa:57473  | ZNF512B | IPI00074893 | hsa:546   | ATRX   | IPI00297633 | 4.506367 |
| hsa:57473  | ZNF512B | IPI00074893 | hsa:27072 | VPS41  | IPI00028051 | 4.506367 |
| hsa:6667   | SP1     | IPI00465152 | hsa:25897 | RNF19A | IPI00019056 | 4.506367 |
| hsa:22806  | IKZF3   | IPI00018923 | hsa:1107  | CHD3   | IPI00373870 | 4.506367 |
| hsa:11244  | ZHX1    | IPI00293086 | hsa:1107  | CHD3   | IPI00373870 | 4.506367 |
| hsa:10320  | IKZF1   | IPI00013232 | hsa:1107  | CHD3   | IPI00373870 | 4.506367 |
| hsa:6667   | SP1     | IPI00465152 | hsa:5371  | PML    | IPI00022348 | 4.506367 |
| hsa:7704   | ZBTB16  | IPI00305613 | hsa:5371  | PML    | IPI00022348 | 4.506367 |
| hsa:7556   | ZNF10   | IPI00009267 | hsa:8805  | TRIM24 | IPI00005184 | 4.506367 |
| hsa:8328   | GFI1B   | IPI00003110 | hsa:5987  | TRIM27 | IPI00426252 | 4.506367 |
| hsa:8328   | GFI1B   | IPI00003110 | hsa:672   | BRCA1  | IPI00218982 | 4.506367 |
| hsa:7528   | YY1     | IPI00014513 | hsa:672   | BRCA1  | IPI00218982 | 4.506367 |
| hsa:26747  | NUFIP1  | IPI00017630 | hsa:672   | BRCA1  | IPI00218982 | 4.506367 |
| hsa:59348  | ZNF350  | IPI00478374 | hsa:672   | BRCA1  | IPI00218982 | 4.506367 |
| hsa:6667   | SP1     | IPI00465152 | hsa:672   | BRCA1  | IPI00218982 | 4.506367 |
| hsa:10524  | HTATIP  | IPI00290020 | hsa:4193  | MDM2   | IPI00025490 | 4.506367 |
| hsa:54840  | APTX    | IPI00420029 | hsa:4591  | TRIM37 | IPI00016619 | 4.506367 |
| hsa:147687 | ZNF417  | IPI00290557 | hsa:4591  | TRIM37 | IPI00016619 | 4.506367 |
| hsa:6670   | SP3     | IPI00025807 | hsa:8554  | PIAS1  | IPI00220424 | 4.506367 |
| hsa:7629   | ZNF76   | IPI00003784 | hsa:8554  | PIAS1  | IPI00220424 | 4.506367 |
| hsa:5178   | PEG3    | IPI00478786 | hsa:7186  | TRAF2  | IPI00030278 | 4.506367 |
| hsa:7597   | ZBTB25  | IPI00217777 | hsa:7186  | TRAF2  | IPI00030278 | 4.506367 |
| hsa:59269  | HIVEP3  | IPI00328089 | hsa:7186  | TRAF2  | IPI00030278 | 4.506367 |
| hsa:23099  | ZBTB43  | IPI00022264 | hsa:7186  | TRAF2  | IPI00030278 | 4.506367 |
| hsa:25988  | MIZF    | IPI00023489 | hsa:7186  | TRAF2  | IPI00030278 | 4.506367 |
| hsa:9726   | ZNF646  | IPI00004419 | hsa:7186  | TRAF2  | IPI00030278 | 4.506367 |
| hsa:10782  | ZNF274  | IPI00062467 | hsa:4804  | NGFR   | IPI00027436 | 4.506367 |
| hsa:10906  | TRAFD1  | IPI00009146 | hsa:7189  | TRAF6  | IPI00743663 | 4.506367 |
| hsa:171392 | ZNF675  | IPI00152427 | hsa:7189  | TRAF6  | IPI00743663 | 4.506367 |
| hsa:10524  | HTATIP  | IPI00290020 | hsa:580   | BARD1  | IPI00017746 | 4.506367 |
| hsa:11244  | ZHX1    | IPI00293086 | hsa:580   | BARD1  | IPI00017746 | 4.506367 |
| hsa:11143  | MYST2   | IPI00180764 | hsa:580   | BARD1  | IPI00017746 | 4.506367 |
| hsa:10524  | HTATIP  | IPI00290020 | hsa:10425 | ARIH2  | IPI00007304 | 4.506367 |
| hsa:58525  | WIZ     | IPI00295502 | hsa:10919 | EHMT2  | IPI00096972 | 4.506367 |
| hsa:1316   | KLF6    | IPI00293523 | hsa:10919 | EHMT2  | IPI00096972 | 4.506367 |
| hsa:1877   | E4F1    | IPI00556439 | hsa:10919 | EHMT2  | IPI00096972 | 4.506367 |
| hsa:11278  | KLF12   | IPI00027024 | hsa:10919 | EHMT2  | IPI00096972 | 4.506367 |
| hsa:5178   | PEG3    | IPI00478786 | hsa:6477  | SIAH1  | IPI00396517 | 4.506367 |
| hsa:5178   | PEG3    | IPI00478786 | hsa:6478  | SIAH2  | IPI00305283 | 4.506367 |
| hsa:115509 | ZNF689  | IPI00073580 | hsa:10155 | TRIM28 | IPI00438229 | 4.506367 |
| hsa:7625   | ZNF74   | IPI00807386 | hsa:10155 | TRIM28 | IPI00438229 | 4.506367 |
| hsa:6940   | ZNF354A | IPI00031589 | hsa:10155 | TRIM28 | IPI00438229 | 4.506367 |
| hsa:84911  | ZNF382  | IPI00797562 | hsa:10155 | TRIM28 | IPI00438229 | 4.506367 |
| hsa:7556   | ZNF10   | IPI00009267 | hsa:10155 | TRIM28 | IPI00438229 | 4.506367 |
| hsa:8517   | IKBKG   | IPI00002411 | hsa:329   | BIRC2  | IPI00013418 | 4.506367 |
| hsa:126070 | ZNF440  | IPI00829765 | hsa:64219 | PJA1   | IPI00294448 | 4.506367 |



|            |           |             |           |          |             |          |
|------------|-----------|-------------|-----------|----------|-------------|----------|
| hsa:51545  | ZNF581    | IPI00009777 | hsa:373   | TRIM23   | IPI00003328 | 4.506367 |
| hsa:8328   | GFI1B     | IPI00003110 | hsa:25898 | RCHY1    | IPI00289787 | 4.506367 |
| hsa:8328   | GFI1B     | IPI00003110 | hsa:11043 | MID2     | IPI00067350 | 4.506367 |
| hsa:22807  | IKZF2     | IPI00007757 | hsa:64375 | IKZF4    | IPI00064241 | 4.506367 |
| hsa:7227   | TRPS1     | IPI00296078 | hsa:6047  | RNF4     | IPI00297694 | 4.506367 |
| hsa:84107  | ZIC4      | IPI00396030 | hsa:90850 | ZNF598   | IPI00328737 | 4.506367 |
| hsa:1316   | KLF6      | IPI00293523 | hsa:10919 | BAT8     | IPI00096972 | 4.506367 |
| hsa:1877   | E4F1      | IPI00556439 | hsa:10919 | BAT8     | IPI00096972 | 4.506367 |
| hsa:10127  | ZNF263    | IPI00298951 | hsa:90933 | TRIM41   | IPI00414021 | 4.506367 |
| hsa:25888  | ZNF473    | IPI00297388 | hsa:90933 | TRIM41   | IPI00414021 | 4.506367 |
| hsa:11278  | KLF12     | IPI00027024 | hsa:10919 | BAT8     | IPI00096972 | 4.506367 |
| hsa:147687 | ZNF417    | IPI00290557 | hsa:4591  | TRIM37   | IPI00016619 | 4.506367 |
| hsa:25988  | MIZF      | IPI00023489 | hsa:7186  | TRAF2    | IPI00030278 | 4.506367 |
| hsa:26036  | ZNF451    | IPI00000725 | hsa:9810  | RNF40    | IPI00162563 | 4.506367 |
| hsa:51545  | ZNF581    | IPI00009777 | hsa:373   | TRIM23   | IPI00003328 | 4.506367 |
| hsa:653121 | ZBTB8     | unknown     | hsa:90933 | TRIM41   | IPI00414021 | 4.506367 |
| hsa:7597   | ZNF46     | IPI00217777 | hsa:7186  | TRAF2    | IPI00030278 | 4.506367 |
| hsa:7704   | ZBTB16    | IPI00305613 | hsa:5987  | RFP      | IPI00426252 | 4.506367 |
| hsa:84775  | ZNF607    | IPI00100922 | hsa:4188  | MDFI     | IPI00023726 | 4.506367 |
| hsa:90594  | ZNF439    | IPI00168560 | hsa:4188  | MDFI     | IPI00023726 | 4.506367 |
| hsa:9726   | ZNF646    | IPI00004419 | hsa:7186  | TRAF2    | IPI00030278 | 4.506367 |
| hsa:9841   | ZBTB24    | IPI00011180 | hsa:4188  | MDFI     | IPI00023726 | 4.506367 |
| hsa:10524  | HTATIP    | IPI00290020 | hsa:10425 | ARIH2    | IPI00007304 | 4.506367 |
| hsa:10524  | HTATIP    | IPI00290020 | hsa:648   | BMI1     | IPI00017299 | 4.506367 |
| hsa:3932   | LCK       | IPI00394952 | hsa:5829  | PXN      | IPI00335634 | 4.496405 |
| hsa:6714   | SRC       | IPI00641230 | hsa:5829  | PXN      | IPI00335634 | 4.496405 |
| hsa:25     | ABL129892 | IPI00216969 | hsa:5829  | PXN      | IPI00335634 | 4.496405 |
| hsa:2534   | FYN       | IPI00219012 | hsa:5829  | PXN      | IPI00335634 | 4.496405 |
| hsa:1445   | CSK       | IPI00013212 | hsa:5829  | PXN      | IPI00335634 | 4.496405 |
| hsa:4145   | MATK      | IPI00000868 | hsa:5829  | PXN      | IPI00335634 | 4.496405 |
| hsa:5582   | PRKCG     | IPI00007128 | hsa:50855 | PARD6A   | IPI00027217 | 4.494998 |
| hsa:5582   | PRKCG     | IPI00007128 | hsa:84612 | PARD6B   | IPI00019025 | 4.494998 |
| hsa:23139  | MAST2     | IPI00514071 | hsa:27148 | STK36    | IPI00235407 | 4.485446 |
| hsa:7006   | TEC       | IPI00000878 | hsa:7409  | VAV1     | IPI00011696 | 4.44752  |
| hsa:695    | BTK       | IPI00029132 | hsa:7409  | VAV1     | IPI00011696 | 4.44752  |
| hsa:4301   | MLLT4     | IPI00398718 | hsa:6016  | RIT1     | IPI00144289 | 4.441991 |
| hsa:4301   | MLLT4     | IPI00398718 | hsa:22808 | MRAS     | IPI00024166 | 4.441991 |
| hsa:4301   | MLLT4     | IPI00398718 | hsa:22800 | RRAS2    | IPI00012512 | 4.441991 |
| hsa:4301   | MLLT4     | IPI00398718 | hsa:5911  | RAP2A    | IPI00019346 | 4.441991 |
| hsa:4301   | MLLT4     | IPI00398718 | hsa:5906  | RAP1A    | IPI00019345 | 4.441991 |
| hsa:4301   | MLLT4     | IPI00398718 | hsa:6237  | RRAS     | IPI00020418 | 4.441991 |
| hsa:4301   | MLLT4     | IPI00398718 | hsa:6014  | RIT2     | IPI00163763 | 4.441991 |
| hsa:4301   | MLLT4     | IPI00398718 | hsa:3265  | HRAS     | IPI00000006 | 4.441991 |
| hsa:11200  | CHEK2     | IPI00014072 | hsa:545   | ATR      | IPI00412298 | 4.410488 |
| hsa:3791   | KDR       | IPI00021396 | hsa:545   | ATR      | IPI00412298 | 4.410488 |
| hsa:1111   | CHEK1     | IPI00023664 | hsa:545   | ATR      | IPI00412298 | 4.410488 |
| hsa:2321   | FLT1      | IPI00018335 | hsa:545   | ATR      | IPI00412298 | 4.410488 |
| hsa:1432   | MAPK14    | IPI00002857 | hsa:10891 | PPARGC1A | IPI00033138 | 4.410487 |
| hsa:1432   | MAPK14    | IPI00002857 | hsa:3172  | HNF4A    | IPI00013196 | 4.410487 |
| hsa:1432   | MAPK14    | IPI00002857 | hsa:2099  | ESR1     | IPI00294982 | 4.410487 |
| hsa:1019   | CDK4      | IPI00007811 | hsa:1028  | CDKN1C   | IPI00029086 | 4.410487 |
| hsa:1019   | CDK4      | IPI00007811 | hsa:1027  | CDKN1B   | IPI00006991 | 4.410487 |
| hsa:1019   | CDK4      | IPI00007811 | hsa:1026  | CDKN1A   | IPI00009384 | 4.410487 |
| hsa:5581   | PRKCE     | IPI00024539 | hsa:58    | ACTA1    | IPI00021428 | 4.410487 |
| hsa:4638   | MYLK      | IPI00336081 | hsa:58    | ACTA1    | IPI00021428 | 4.410487 |
| hsa:51086  | TNNI3K    | IPI00655547 | hsa:58    | ACTA1    | IPI00021428 | 4.410487 |
| hsa:2261   | FGFR3     | IPI00027174 | hsa:3191  | HNRNPL   | IPI00465225 | 4.410487 |
| hsa:3932   | LCK       | IPI00394952 | hsa:2100  | ESR2     | IPI00023212 | 4.410487 |
| hsa:3932   | LCK       | IPI00394952 | hsa:2099  | ESR1     | IPI00294982 | 4.410487 |
| hsa:5594   | MAPK1     | IPI00003479 | hsa:367   | AR       | IPI00020070 | 4.410487 |

|           |              |             |            |           |             |          |
|-----------|--------------|-------------|------------|-----------|-------------|----------|
| hsa:5594  | MAPK1        | IPI00003479 | hsa:5468   | PPARG     | IPI00794250 | 4.410487 |
| hsa:5594  | MAPK1        | IPI00003479 | hsa:2516   | NR5A1     | IPI00012446 | 4.410487 |
| hsa:5594  | MAPK1        | IPI00003479 | hsa:6256   | RXRA      | IPI00418394 | 4.410487 |
| hsa:5594  | MAPK1        | IPI00003479 | hsa:5465   | PPARA     | IPI00020097 | 4.410487 |
| hsa:5594  | MAPK1        | IPI00003479 | hsa:3164   | NR4A1     | IPI00743108 | 4.410487 |
| hsa:5594  | MAPK1        | IPI00003479 | hsa:2099   | ESR1      | IPI00294982 | 4.410487 |
| hsa:5580  | PRKCD        | IPI00329236 | hsa:2101   | ESRRA     | IPI00005717 | 4.410487 |
| hsa:5580  | PRKCD        | IPI00329236 | hsa:5465   | PPARA     | IPI00020097 | 4.410487 |
| hsa:5580  | PRKCD        | IPI00329236 | hsa:58     | ACTA1     | IPI00021428 | 4.410487 |
| hsa:5580  | PRKCD        | IPI00329236 | hsa:59     | ACTA2     | IPI00008603 | 4.410487 |
| hsa:6714  | SRC          | IPI00641230 | hsa:5241   | PGR       | IPI00297419 | 4.410487 |
| hsa:6714  | SRC          | IPI00641230 | hsa:2100   | ESR2      | IPI00023212 | 4.410487 |
| hsa:6714  | SRC          | IPI00641230 | hsa:5467   | PPARD     | IPI00009330 | 4.410487 |
| hsa:6714  | SRC          | IPI00641230 | hsa:2099   | ESR1      | IPI00294982 | 4.410487 |
| hsa:5599  | MAPK8        | IPI00024672 | hsa:5468   | PPARG     | IPI00794250 | 4.410487 |
| hsa:5595  | MAPK3        | IPI00018195 | hsa:2099   | ESR1      | IPI00294982 | 4.410487 |
| hsa:5595  | MAPK3        | IPI00018195 | hsa:5465   | PPARA     | IPI00020097 | 4.410487 |
| hsa:9252  | RPS6KA5      | IPI00335101 | hsa:3164   | NR4A1     | IPI00743108 | 4.410487 |
| hsa:1956  | EGFR         | IPI00018274 | hsa:2099   | ESR1      | IPI00294982 | 4.410487 |
| hsa:1020  | CDK5         | IPI00023530 | hsa:1027   | CDKN1B    | IPI00006991 | 4.410487 |
| hsa:1020  | CDK5         | IPI00023530 | hsa:8867   | SYNJ1     | IPI00012441 | 4.410487 |
| hsa:90    | ACVR1        | IPI00029219 | hsa:7068   | THRB      | IPI00446999 | 4.410487 |
| hsa:90    | ACVR1        | IPI00029219 | hsa:7421   | VDR       | IPI00005716 | 4.410487 |
| hsa:90    | ACVR1        | IPI00029219 | hsa:6256   | RXRA      | IPI00418394 | 4.410487 |
| hsa:25    | ABL129892    | IPI00216969 | hsa:1027   | CDKN1B    | IPI00006991 | 4.410487 |
| hsa:983   | CDC2         | IPI00073536 | hsa:3306   | HSPA2     | IPI00007702 | 4.410487 |
| hsa:5578  | PRKCA        | IPI00385449 | hsa:5465   | PPARA     | IPI00020097 | 4.410487 |
| hsa:5578  | PRKCA        | IPI00385449 | hsa:2130   | EWSR1     | IPI00872855 | 4.410487 |
| hsa:5058  | PAK1         | IPI00656138 | hsa:2099   | ESR1      | IPI00294982 | 4.410487 |
| hsa:4067  | LYN          | IPI00298625 | hsa:1027   | CDKN1B    | IPI00006991 | 4.410487 |
| hsa:1452  | CSNK1A1      | IPI00183400 | hsa:3183   | HNRNPC    | IPI00477313 | 4.410487 |
| hsa:5566  | PRKACA730418 | IPI00396630 | hsa:2099   | ESR1      | IPI00294982 | 4.410487 |
| hsa:5566  | PRKACA730418 | IPI00396630 | hsa:5725   | PTBP1     | IPI00179964 | 4.410487 |
| hsa:5566  | PRKACA730418 | IPI00396630 | hsa:3184   | HNRPD     | IPI00028888 | 4.410487 |
| hsa:5590  | PRKCZ        | IPI00013749 | hsa:4691   | NCL       | IPI00604620 | 4.410487 |
| hsa:2932  | GSK3B        | IPI00028570 | hsa:3184   | HNRPD     | IPI00028888 | 4.410487 |
| hsa:657   | BMPR1A       | IPI00005731 | hsa:10262  | SF3B4     | IPI00017339 | 4.410487 |
| hsa:2048  | EPHB2        | IPI00021275 | hsa:8867   | SYNJ1     | IPI00012441 | 4.410487 |
| hsa:2268  | FGR          | IPI00016871 | hsa:7421   | VDR       | IPI00005716 | 4.410487 |
| hsa:1457  | CSNK2A1      | IPI00744507 | hsa:3181   | HNRNPA2B1 | IPI00396378 | 4.410487 |
| hsa:1457  | CSNK2A1      | IPI00744507 | hsa:4691   | NCL       | IPI00604620 | 4.410487 |
| hsa:1457  | CSNK2A1      | IPI00744507 | hsa:3183   | HNRNPC    | IPI00477313 | 4.410487 |
| hsa:1457  | CSNK2A1      | IPI00744507 | hsa:5241   | PGR       | IPI00297419 | 4.410487 |
| hsa:1457  | CSNK2A1      | IPI00744507 | hsa:140890 | SFRS12    | IPI00103497 | 4.410487 |
| hsa:1457  | CSNK2A1      | IPI00744507 | hsa:7421   | VDR       | IPI00005716 | 4.410487 |
| hsa:1459  | CSNK2A2      | IPI00020602 | hsa:4691   | NCL       | IPI00604620 | 4.410487 |
| hsa:1459  | CSNK2A2      | IPI00020602 | hsa:3183   | HNRNPC    | IPI00477313 | 4.410487 |
| hsa:695   | BTK          | IPI00029132 | hsa:2130   | EWSR1     | IPI00872855 | 4.410487 |
| hsa:659   | BMPR2        | IPI00783156 | hsa:93973  | ACTR8     | IPI00025646 | 4.410487 |
| hsa:659   | BMPR2        | IPI00783156 | hsa:10236  | HNRNPR    | IPI00012074 | 4.410487 |
| hsa:3643  | INSR         | IPI00220325 | hsa:10492  | SYNCRIP   | IPI00018140 | 4.410487 |
| hsa:10188 | TNK2         | IPI00167089 | hsa:6430   | SFRS5     | IPI00012341 | 4.410487 |
| hsa:1025  | CDK9         | IPI00301923 | hsa:27336  | HTATSF1   | IPI00013788 | 4.410487 |
| hsa:5062  | PAK2         | IPI00787208 | hsa:1975   | EIF4B     | IPI00012079 | 4.410487 |
| hsa:1147  | CHUK         | IPI00005104 | hsa:7182   | NR2C2     | IPI00749258 | 4.410487 |
| hsa:3551  | IKBKB        | IPI00024709 | hsa:7182   | NR2C2     | IPI00749258 | 4.410487 |
| hsa:4678  | NASP         | IPI00179953 | hsa:9706   | ULK2      | IPI00479399 | 4.410487 |
| hsa:6198  | RPS6KB1      | IPI00216132 | hsa:84271  | POLDIP3   | IPI00440688 | 4.410487 |
| hsa:6195  | RPS6KA1      | IPI00017305 | hsa:4929   | NR4A2     | IPI00018033 | 4.410487 |
| hsa:6195  | RPS6KA1      | IPI00017305 | hsa:8013   | NR4A3     | IPI00328269 | 4.410487 |

|           |          |             |            |         |             |          |
|-----------|----------|-------------|------------|---------|-------------|----------|
| hsa:9261  | MAPKAPK2 | IPI00026054 | hsa:10949  | HNRNPA0 | IPI00011913 | 4.410487 |
| hsa:5601  | MAPK9    | IPI00024673 | hsa:10262  | SF3B4   | IPI00017339 | 4.410487 |
| hsa:2289  | FKBP5    | IPI00218775 | hsa:9641   | IKBKE   | IPI00029045 | 4.410487 |
| hsa:10953 | TOMM34   | IPI00009946 | hsa:5562   | PRKAA1  | IPI00872804 | 4.410487 |
| hsa:5562  | PRKAA1   | IPI00872804 | hsa:5571   | PRKAG1  | IPI00413318 | 4.410487 |
| hsa:5562  | PRKAA1   | IPI00872804 | hsa:53632  | PRKAG3  | IPI00220340 | 4.410487 |
| hsa:5563  | PRKAA2   | IPI00307755 | hsa:5571   | PRKAG1  | IPI00413318 | 4.410487 |
| hsa:6732  | SRPK1    | IPI00290439 | hsa:6431   | SFRS6   | IPI00012345 | 4.410487 |
| hsa:6732  | SRPK1    | IPI00290439 | hsa:6428   | SFRS3   | IPI00010204 | 4.410487 |
| hsa:6732  | SRPK1    | IPI00290439 | hsa:6430   | SFRS5   | IPI00012341 | 4.410487 |
| hsa:6732  | SRPK1    | IPI00290439 | hsa:11338  | U2AF2   | IPI00031556 | 4.410487 |
| hsa:23097 | CDC2L6   | IPI00250316 | hsa:6432   | SFRS7   | IPI00003377 | 4.410487 |
| hsa:3551  | IKBKB    | IPI00024709 | hsa:71     | ACTG1   | unknown     | 4.410487 |
| hsa:3551  | IKBKB    | IPI00024709 | hsa:3313   | HSPA9   | IPI00007765 | 4.410487 |
| hsa:3551  | IKBKB    | IPI00024709 | hsa:3309   | HSPA5   | IPI00003362 | 4.410487 |
| hsa:6767  | ST13     | IPI00032826 | hsa:4215   | MAP3K3  | IPI00017801 | 4.410487 |
| hsa:3932  | LCK      | IPI00394952 | hsa:2908   | NR3C1   | IPI00022282 | 4.410487 |
| hsa:6195  | RPS6KA1  | IPI00017305 | hsa:1975   | EIF4B   | IPI00012079 | 4.410487 |
| hsa:8737  | RIPK1    | IPI00013773 | hsa:3309   | HSPA5   | IPI00003362 | 4.410487 |
| hsa:8737  | RIPK1    | IPI00013773 | hsa:71     | ACTG1   | unknown     | 4.410487 |
| hsa:8767  | RIPK2    | IPI00021917 | hsa:3306   | HSPA2   | IPI00007702 | 4.410487 |
| hsa:11035 | RIPK3    | IPI00294938 | hsa:3178   | HNRNPA1 | IPI00215965 | 4.410487 |
| hsa:11035 | RIPK3    | IPI00294938 | hsa:4841   | NONO    | IPI00304596 | 4.410487 |
| hsa:11035 | RIPK3    | IPI00294938 | hsa:3187   | HNRPH1  | IPI00013881 | 4.410487 |
| hsa:11035 | RIPK3    | IPI00294938 | hsa:3309   | HSPA5   | IPI00003362 | 4.410487 |
| hsa:3932  | LCK      | IPI00394952 | hsa:10146  | G3BP1   | IPI00012442 | 4.410487 |
| hsa:29110 | TBK1     | IPI00293613 | hsa:4670   | HNRPM   | IPI00171903 | 4.410487 |
| hsa:29110 | TBK1     | IPI00293613 | hsa:6421   | SFPQ    | IPI00010740 | 4.410487 |
| hsa:3702  | ITK      | IPI00004566 | hsa:10146  | G3BP1   | IPI00012442 | 4.410487 |
| hsa:4215  | MAP3K3   | IPI00017801 | hsa:3313   | HSPA9   | IPI00007765 | 4.410487 |
| hsa:4215  | MAP3K3   | IPI00017801 | hsa:71     | ACTG1   | unknown     | 4.410487 |
| hsa:4215  | MAP3K3   | IPI00017801 | hsa:9782   | MATR3   | IPI00017297 | 4.410487 |
| hsa:4215  | MAP3K3   | IPI00017801 | hsa:3187   | HNRPH1  | IPI00013881 | 4.410487 |
| hsa:4215  | MAP3K3   | IPI00017801 | hsa:3309   | HSPA5   | IPI00003362 | 4.410487 |
| hsa:9020  | MAP3K14  | IPI00016099 | hsa:4670   | HNRPM   | IPI00171903 | 4.410487 |
| hsa:9020  | MAP3K14  | IPI00016099 | hsa:71     | ACTG1   | unknown     | 4.410487 |
| hsa:9020  | MAP3K14  | IPI00016099 | hsa:3313   | HSPA9   | IPI00007765 | 4.410487 |
| hsa:9020  | MAP3K14  | IPI00016099 | hsa:3309   | HSPA5   | IPI00003362 | 4.410487 |
| hsa:2289  | FKBP5    | IPI00218775 | hsa:4214   | MAP3K1  | IPI00855985 | 4.410487 |
| hsa:9641  | IKBKE    | IPI00029045 | hsa:71     | ACTG1   | unknown     | 4.410487 |
| hsa:9641  | IKBKE    | IPI00029045 | hsa:3187   | HNRPH1  | IPI00013881 | 4.410487 |
| hsa:9641  | IKBKE    | IPI00029045 | hsa:3313   | HSPA9   | IPI00007765 | 4.410487 |
| hsa:4214  | MAP3K1   | IPI00855985 | hsa:4670   | HNRPM   | IPI00171903 | 4.410487 |
| hsa:4214  | MAP3K1   | IPI00855985 | hsa:71     | ACTG1   | unknown     | 4.410487 |
| hsa:4214  | MAP3K1   | IPI00855985 | hsa:3313   | HSPA9   | IPI00007765 | 4.410487 |
| hsa:4214  | MAP3K1   | IPI00855985 | hsa:3309   | HSPA5   | IPI00003362 | 4.410487 |
| hsa:1445  | CSK      | IPI00013212 | hsa:10146  | G3BP1   | IPI00012442 | 4.410487 |
| hsa:6446  | SGK      | IPI00297590 | hsa:3191   | HNRNPL  | IPI00465225 | 4.410487 |
| hsa:9641  | IKBKE    | IPI00029045 | hsa:10146  | G3BP1   | IPI00012442 | 4.410487 |
| hsa:2932  | GSK3B    | IPI00028570 | hsa:10642  | IGF2BP1 | IPI00008557 | 4.410487 |
| hsa:2932  | GSK3B    | IPI00028570 | hsa:2130   | EWSR1   | IPI00872855 | 4.410487 |
| hsa:8428  | STK24    | IPI00002212 | hsa:9782   | MATR3   | IPI00017297 | 4.410487 |
| hsa:8428  | STK24    | IPI00002212 | hsa:220988 | HNRPA3  | IPI00419373 | 4.410487 |
| hsa:8428  | STK24    | IPI00002212 | hsa:2130   | EWSR1   | IPI00872855 | 4.410487 |
| hsa:8428  | STK24    | IPI00002212 | hsa:9908   | G3BP2   | IPI00009057 | 4.410487 |
| hsa:6732  | SRPK1    | IPI00290439 | hsa:10921  | RNPS1   | IPI00033561 | 4.410487 |
| hsa:23043 | TNIK     | IPI00145805 | hsa:51639  | SF3B14  | IPI00032827 | 4.410487 |
| hsa:23043 | TNIK     | IPI00145805 | hsa:6629   | SNRPB2  | IPI00029267 | 4.410487 |
| hsa:23043 | TNIK     | IPI00145805 | hsa:220988 | HNRPA3  | IPI00419373 | 4.410487 |
| hsa:1017  | CDK2     | IPI00031681 | hsa:26986  | PABPC1  | IPI00008524 | 4.410487 |

|            |              |             |           |             |             |          |
|------------|--------------|-------------|-----------|-------------|-------------|----------|
| hsa:9641   | IKBKE        | IPI00029045 | hsa:3183  | HNRNPC      | IPI00477313 | 4.410487 |
| hsa:9641   | IKBKE        | IPI00029045 | hsa:26986 | PABPC1      | IPI00008524 | 4.410487 |
| hsa:9641   | IKBKE        | IPI00029045 | hsa:7458  | EIF4H653994 | IPI00014263 | 4.410487 |
| hsa:9641   | IKBKE        | IPI00029045 | hsa:8761  | PABPC4      | IPI00012726 | 4.410487 |
| hsa:9641   | IKBKE        | IPI00029045 | hsa:6741  | SSB         | IPI00009032 | 4.410487 |
| hsa:9641   | IKBKE        | IPI00029045 | hsa:10492 | SYNCRIP     | IPI00018140 | 4.410487 |
| hsa:9641   | IKBKE        | IPI00029045 | hsa:4670  | HNRPM       | IPI00171903 | 4.410487 |
| hsa:9641   | IKBKE        | IPI00029045 | hsa:9939  | RBM8A       | IPI00001757 | 4.410487 |
| hsa:9641   | IKBKE        | IPI00029045 | hsa:51639 | SF3B14      | IPI00032827 | 4.410487 |
| hsa:9641   | IKBKE        | IPI00029045 | hsa:6629  | SNRPB2      | IPI00029267 | 4.410487 |
| hsa:80155  | NARG1        | IPI00386189 | hsa:23043 | TNIK        | IPI00145805 | 4.410487 |
| hsa:4678   | NASP         | IPI00179953 | hsa:6446  | SGK         | IPI00297590 | 4.410487 |
| hsa:984    | CDC2L1       | IPI00215999 | hsa:10921 | RNPS1       | IPI00033561 | 4.410487 |
| hsa:1457   | CSNK2A1      | IPI00744507 | hsa:10921 | RNPS1       | IPI00033561 | 4.410487 |
| hsa:1459   | CSNK2A2      | IPI00020602 | hsa:10921 | RNPS1       | IPI00033561 | 4.410487 |
| hsa:5062   | PAK2         | IPI00787208 | hsa:11052 | CPSF6       | IPI00012998 | 4.410487 |
| hsa:6733   | SRPK2        | IPI00333420 | hsa:10921 | RNPS1       | IPI00033561 | 4.410487 |
| hsa:3611   | ILK          | IPI00013219 | hsa:2130  | EWSR1       | IPI00872855 | 4.410487 |
| hsa:80155  | NARG1        | IPI00386189 | hsa:9641  | IKBKE       | IPI00029045 | 4.410487 |
| hsa:6446   | SGK          | IPI00297590 | hsa:10525 | HYOU1       | IPI00000877 | 4.410487 |
| hsa:6446   | SGK          | IPI00297590 | hsa:4670  | HNRPM       | IPI00171903 | 4.410487 |
| hsa:3611   | ILK          | IPI00013219 | hsa:10642 | IGF2BP1     | IPI00008557 | 4.410487 |
| hsa:8428   | STK24        | IPI00002212 | hsa:10492 | SYNCRIP     | IPI00018140 | 4.410487 |
| hsa:5218   | PFTK1        | IPI00165249 | hsa:1026  | CDKN1A      | IPI00009384 | 4.410487 |
| hsa:7525   | YES1         | IPI00013981 | hsa:1027  | CDKN1B      | IPI00006991 | 4.410487 |
| hsa:2289   | FKBP5        | IPI00218775 | hsa:6885  | MAP3K7      | IPI00295738 | 4.410487 |
| hsa:23770  | FKBP8        | IPI00328161 | hsa:1432  | MAPK14      | IPI00002857 | 4.410487 |
| hsa:1022   | CDK7         | IPI00000685 | hsa:5914  | RARA        | IPI00020071 | 4.410487 |
| hsa:5578   | PRKCA        | IPI00385449 | hsa:5914  | RARA        | IPI00020071 | 4.410487 |
| hsa:1022   | CDK7         | IPI00000685 | hsa:7067  | THRA        | IPI00022991 | 4.410487 |
| hsa:55622  | TTC27        | IPI00183938 | hsa:7046  | TGFBR1      | IPI00005733 | 4.410487 |
| hsa:79657  | RPAP3        | IPI00002408 | hsa:7046  | TGFBR1      | IPI00005733 | 4.410487 |
| hsa:51433  | ANAPC5       | IPI00008247 | hsa:7046  | TGFBR1      | IPI00005733 | 4.410487 |
| hsa:7265   | TTC1         | IPI00016912 | hsa:7046  | TGFBR1      | IPI00005733 | 4.410487 |
| hsa:10273  | STUB1        | IPI00025156 | hsa:7046  | TGFBR1      | IPI00005733 | 4.410487 |
| hsa:1452   | CSNK1A1      | IPI00183400 | hsa:60    | ACTB        | IPI00021439 | 4.410487 |
| hsa:5580   | PRKCD        | IPI00329236 | hsa:60    | ACTB        | IPI00021439 | 4.410487 |
| hsa:4067   | LYN          | IPI00298625 | hsa:60    | ACTB        | IPI00021439 | 4.410487 |
| hsa:3055   | HCK          | IPI00646510 | hsa:60    | ACTB        | IPI00021439 | 4.410487 |
| hsa:51086  | TNNI3K       | IPI00655547 | hsa:70    | ACTC1       | IPI00023006 | 4.410487 |
| hsa:4638   | MYLK         | IPI00336081 | hsa:70    | ACTC1       | IPI00023006 | 4.410487 |
| hsa:5581   | PRKCE        | IPI00024539 | hsa:70    | ACTC1       | IPI00023006 | 4.410487 |
| hsa:9049   | AIP          | IPI00010460 | hsa:51086 | TNNI3K      | IPI00655547 | 4.410487 |
| hsa:1021   | CDK6         | IPI00023529 | hsa:1026  | CDKN1A      | IPI00009384 | 4.410487 |
| hsa:983    | CDC2         | IPI00073536 | hsa:1026  | CDKN1A      | IPI00009384 | 4.410487 |
| hsa:1457   | CSNK2A1      | IPI00744507 | hsa:1026  | CDKN1A      | IPI00009384 | 4.410487 |
| hsa:1613   | DAPK3        | IPI00015213 | hsa:1026  | CDKN1A      | IPI00009384 | 4.410487 |
| hsa:8317   | CDC7         | IPI00448121 | hsa:1026  | CDKN1A      | IPI00009384 | 4.410487 |
| hsa:5599   | MAPK8        | IPI00024672 | hsa:1026  | CDKN1A      | IPI00009384 | 4.410487 |
| hsa:5292   | PIM1         | IPI00005014 | hsa:1026  | CDKN1A      | IPI00009384 | 4.410487 |
| hsa:207    | AKT1         | IPI00012866 | hsa:1026  | CDKN1A      | IPI00009384 | 4.410487 |
| hsa:1018   | CDK3         | IPI00023503 | hsa:1026  | CDKN1A      | IPI00009384 | 4.410487 |
| hsa:1017   | CDK2         | IPI00031681 | hsa:1026  | CDKN1A      | IPI00009384 | 4.410487 |
| hsa:225689 | MAPK15       | IPI00747020 | hsa:2908  | NR3C1       | IPI00022282 | 4.410487 |
| hsa:5566   | PRKACA730418 | IPI00396630 | hsa:2908  | NR3C1       | IPI00022282 | 4.410487 |
| hsa:5599   | MAPK8        | IPI00024672 | hsa:2908  | NR3C1       | IPI00022282 | 4.410487 |
| hsa:5594   | MAPK1        | IPI00003479 | hsa:2908  | NR3C1       | IPI00022282 | 4.410487 |
| hsa:5894   | RAF1         | IPI00021786 | hsa:2908  | NR3C1       | IPI00022282 | 4.410487 |
| hsa:5611   | DNAJC3       | IPI00006713 | hsa:5610  | EIF2AK2     | IPI00019463 | 4.410487 |
| hsa:2580   | GAK          | IPI00298949 | hsa:367   | AR          | IPI00020070 | 4.410487 |

|           |           |             |            |         |             |          |
|-----------|-----------|-------------|------------|---------|-------------|----------|
| hsa:1956  | EGFR      | IPI00018274 | hsa:367    | AR      | IPI00020070 | 4.410487 |
| hsa:1022  | CDK7      | IPI00000685 | hsa:367    | AR      | IPI00020070 | 4.410487 |
| hsa:983   | CDC2      | IPI00073536 | hsa:367    | AR      | IPI00020070 | 4.410487 |
| hsa:6041  | RNASEL    | IPI00015864 | hsa:367    | AR      | IPI00020070 | 4.410487 |
| hsa:1021  | CDK6      | IPI00023529 | hsa:367    | AR      | IPI00020070 | 4.410487 |
| hsa:1025  | CDK9      | IPI00301923 | hsa:367    | AR      | IPI00020070 | 4.410487 |
| hsa:56924 | PAK6      | IPI00024584 | hsa:367    | AR      | IPI00020070 | 4.410487 |
| hsa:10114 | HIPK3     | IPI00099522 | hsa:367    | AR      | IPI00020070 | 4.410487 |
| hsa:207   | AKT1      | IPI00012866 | hsa:367    | AR      | IPI00020070 | 4.410487 |
| hsa:5894  | RAF1      | IPI00021786 | hsa:367    | AR      | IPI00020070 | 4.410487 |
| hsa:25    | ABL129892 | IPI00216969 | hsa:58     | ACTA1   | IPI00021428 | 4.410487 |
| hsa:7273  | TTN       | IPI00759754 | hsa:58     | ACTA1   | IPI00021428 | 4.410487 |
| hsa:5578  | PRKCA     | IPI00385449 | hsa:58     | ACTA1   | IPI00021428 | 4.410487 |
| hsa:5058  | PAK1      | IPI00656138 | hsa:58     | ACTA1   | IPI00021428 | 4.410487 |
| hsa:1956  | EGFR      | IPI00018274 | hsa:58     | ACTA1   | IPI00021428 | 4.410487 |
| hsa:55622 | TTC27     | IPI00183938 | hsa:90     | ACVR1   | IPI00029219 | 4.410487 |
| hsa:55761 | TTC17     | IPI00302966 | hsa:90     | ACVR1   | IPI00029219 | 4.410487 |
| hsa:2288  | FKBP4     | IPI00219005 | hsa:90     | ACVR1   | IPI00029219 | 4.410487 |
| hsa:27330 | RPS6KA6   | IPI00007123 | hsa:3164   | NR4A1   | IPI00743108 | 4.410487 |
| hsa:6197  | RPS6KA3   | IPI00020898 | hsa:3164   | NR4A1   | IPI00743108 | 4.410487 |
| hsa:6195  | RPS6KA1   | IPI00017305 | hsa:3164   | NR4A1   | IPI00743108 | 4.410487 |
| hsa:207   | AKT1      | IPI00012866 | hsa:3164   | NR4A1   | IPI00743108 | 4.410487 |
| hsa:9891  | NUAK1     | IPI00028566 | hsa:3309   | HSPA5   | IPI00003362 | 4.410487 |
| hsa:2081  | ERN1      | IPI00015974 | hsa:3309   | HSPA5   | IPI00003362 | 4.410487 |
| hsa:9451  | EIF2AK3   | IPI00303053 | hsa:3309   | HSPA5   | IPI00003362 | 4.410487 |
| hsa:6674  | SPAG1     | IPI00292326 | hsa:5578   | PRKCA   | IPI00385449 | 4.410487 |
| hsa:50488 | MINK1     | IPI00166680 | hsa:59     | ACTA2   | IPI00008603 | 4.410487 |
| hsa:8473  | OGT       | IPI00005780 | hsa:2932   | GSK3B   | IPI00028570 | 4.410487 |
| hsa:55622 | TTC27     | IPI00183938 | hsa:658    | BMPR1B  | IPI00010862 | 4.410487 |
| hsa:55761 | TTC17     | IPI00302966 | hsa:658    | BMPR1B  | IPI00010862 | 4.410487 |
| hsa:10273 | STUB1     | IPI00025156 | hsa:658    | BMPR1B  | IPI00010862 | 4.410487 |
| hsa:2064  | ERBB2     | IPI00300384 | hsa:2099   | ESR1    | IPI00294982 | 4.410487 |
| hsa:3480  | IGF1R     | IPI00027232 | hsa:2099   | ESR1    | IPI00294982 | 4.410487 |
| hsa:1147  | CHUK      | IPI00005104 | hsa:2099   | ESR1    | IPI00294982 | 4.410487 |
| hsa:1022  | CDK7      | IPI00000685 | hsa:2099   | ESR1    | IPI00294982 | 4.410487 |
| hsa:56924 | PAK6      | IPI00024584 | hsa:2099   | ESR1    | IPI00294982 | 4.410487 |
| hsa:2872  | MKNK2     | IPI00396114 | hsa:2099   | ESR1    | IPI00294982 | 4.410487 |
| hsa:6195  | RPS6KA1   | IPI00017305 | hsa:2099   | ESR1    | IPI00294982 | 4.410487 |
| hsa:6197  | RPS6KA3   | IPI00020898 | hsa:2099   | ESR1    | IPI00294982 | 4.410487 |
| hsa:208   | AKT2      | IPI00012870 | hsa:2099   | ESR1    | IPI00294982 | 4.410487 |
| hsa:207   | AKT1      | IPI00012866 | hsa:2099   | ESR1    | IPI00294982 | 4.410487 |
| hsa:51555 | PEX5L     | IPI00009809 | hsa:5894   | RAF1    | IPI00021786 | 4.410487 |
| hsa:207   | AKT1      | IPI00012866 | hsa:1027   | CDKN1B  | IPI00006991 | 4.410487 |
| hsa:1018  | CDK3      | IPI00023503 | hsa:1027   | CDKN1B  | IPI00006991 | 4.410487 |
| hsa:1017  | CDK2      | IPI00031681 | hsa:1027   | CDKN1B  | IPI00006991 | 4.410487 |
| hsa:5600  | MAPK11    | IPI00019473 | hsa:2100   | ESR2    | IPI00023212 | 4.410487 |
| hsa:207   | AKT1      | IPI00012866 | hsa:2100   | ESR2    | IPI00023212 | 4.410487 |
| hsa:2872  | MKNK2     | IPI00396114 | hsa:2100   | ESR2    | IPI00023212 | 4.410487 |
| hsa:10114 | HIPK3     | IPI00099522 | hsa:7026   | NR2F2   | IPI00028611 | 4.410487 |
| hsa:2288  | FKBP4     | IPI00219005 | hsa:1457   | CSNK2A1 | IPI00744507 | 4.410487 |
| hsa:9049  | AIP       | IPI00010460 | hsa:1457   | CSNK2A1 | IPI00744507 | 4.410487 |
| hsa:8473  | OGT       | IPI00005780 | hsa:1457   | CSNK2A1 | IPI00744507 | 4.410487 |
| hsa:5536  | PPP5C     | IPI00019812 | hsa:4217   | MAP3K5  | IPI00412433 | 4.410487 |
| hsa:10273 | STUB1     | IPI00025156 | hsa:2064   | ERBB2   | IPI00300384 | 4.410487 |
| hsa:5598  | MAPK7     | IPI00376860 | hsa:6256   | RXRA    | IPI00418394 | 4.410487 |
| hsa:9646  | CTR9      | IPI00477468 | hsa:640    | BLK     | IPI00554756 | 4.410487 |
| hsa:1022  | CDK7      | IPI00000685 | hsa:7421   | VDR     | IPI00005716 | 4.410487 |
| hsa:4145  | MATK      | IPI00000868 | hsa:2130   | EWSR1   | IPI00872855 | 4.410487 |
| hsa:2185  | PTK2B     | IPI00029702 | hsa:2130   | EWSR1   | IPI00872855 | 4.410487 |
| hsa:6732  | SRPK1     | IPI00290439 | hsa:140890 | SFRS12  | IPI00103497 | 4.410487 |

|           |         |             |            |         |             |          |
|-----------|---------|-------------|------------|---------|-------------|----------|
| hsa:26576 | SRPK3   | IPI00010067 | hsa:140890 | SFRS12  | IPI00103497 | 4.410487 |
| hsa:24148 | PRPF6   | IPI00305068 | hsa:369    | ARAF    | IPI00872240 | 4.410487 |
| hsa:2289  | FKBP5   | IPI00218775 | hsa:1147   | CHUK    | IPI00005104 | 4.410487 |
| hsa:4215  | MAP3K3  | IPI00017801 | hsa:3306   | HSPA2   | IPI00007702 | 4.410487 |
| hsa:6732  | SRPK1   | IPI00290439 | hsa:6426   | SFRS1   | IPI00215884 | 4.410487 |
| hsa:51755 | CRKRS   | IPI00021175 | hsa:6426   | SFRS1   | IPI00215884 | 4.410487 |
| hsa:8899  | PRPF4B  | IPI00013721 | hsa:6426   | SFRS1   | IPI00215884 | 4.410487 |
| hsa:6733  | SRPK2   | IPI00333420 | hsa:6426   | SFRS1   | IPI00215884 | 4.410487 |
| hsa:6732  | SRPK1   | IPI00290439 | hsa:6625   | SNRP70  | IPI00290204 | 4.410487 |
| hsa:6732  | SRPK1   | IPI00290439 | hsa:6294   | SAFB    | IPI00300631 | 4.410487 |
| hsa:3984  | LIMK1   | IPI00291702 | hsa:1028   | CDKN1C  | IPI00029086 | 4.410487 |
| hsa:1760  | DMPK    | IPI00305254 | hsa:10658  | CUGBP1  | IPI00034015 | 4.410487 |
| hsa:5611  | DNAJC3  | IPI00006713 | hsa:9451   | EIF2AK3 | IPI00303053 | 4.410487 |
| hsa:6732  | SRPK1   | IPI00290439 | hsa:7307   | U2AF1   | IPI00005613 | 4.410487 |
| hsa:5563  | PRKAA2  | IPI00307755 | hsa:3172   | HNF4A   | IPI00013196 | 4.410487 |
| hsa:51755 | CRKRS   | IPI00021175 | hsa:6427   | SFRS2   | IPI00005978 | 4.410487 |
| hsa:6732  | SRPK1   | IPI00290439 | hsa:6429   | SFRS4   | IPI00000015 | 4.410487 |
| hsa:11040 | PIM2    | IPI00332692 | hsa:3189   | HNRPH3  | IPI00013877 | 4.410487 |
| hsa:6733  | SRPK2   | IPI00333420 | hsa:11338  | U2AF2   | IPI00031556 | 4.410487 |
| hsa:9891  | NUAK1   | IPI00028566 | hsa:5571   | PRKAG1  | IPI00413318 | 4.410487 |
| hsa:4214  | MAP3K1  | IPI00855985 | hsa:4691   | NCL     | IPI00604620 | 4.410487 |
| hsa:9020  | MAP3K14 | IPI00016099 | hsa:4691   | NCL     | IPI00604620 | 4.410487 |
| hsa:9020  | MAP3K14 | IPI00016099 | hsa:3178   | HNRNPA1 | IPI00215965 | 4.410487 |
| hsa:1025  | CDK9    | IPI00301923 | hsa:10002  | NR2E3   | IPI00001888 | 4.410487 |
| hsa:9020  | MAP3K14 | IPI00016099 | hsa:6421   | SFPQ    | IPI00010740 | 4.410487 |
| hsa:9020  | MAP3K14 | IPI00016099 | hsa:26986  | PABPC1  | IPI00008524 | 4.410487 |
| hsa:9020  | MAP3K14 | IPI00016099 | hsa:6741   | SSB     | IPI00009032 | 4.410487 |
| hsa:11035 | RIPK3   | IPI00294938 | hsa:3313   | HSPA9   | IPI00007765 | 4.410487 |
| hsa:8737  | RIPK1   | IPI00013773 | hsa:3313   | HSPA9   | IPI00007765 | 4.410487 |
| hsa:29110 | TBK1    | IPI00293613 | hsa:3313   | HSPA9   | IPI00007765 | 4.410487 |
| hsa:11035 | RIPK3   | IPI00294938 | hsa:71     | ACTG1   | unknown     | 4.410487 |
| hsa:8767  | RIPK2   | IPI00021917 | hsa:71     | ACTG1   | unknown     | 4.410487 |
| hsa:29110 | TBK1    | IPI00293613 | hsa:3309   | HSPA5   | IPI00003362 | 4.410487 |
| hsa:29110 | TBK1    | IPI00293613 | hsa:4841   | NONO    | IPI00304596 | 4.410487 |
| hsa:7266  | DNAJC7  | IPI00329629 | hsa:4215   | MAP3K3  | IPI00017801 | 4.410487 |
| hsa:10273 | STUB1   | IPI00025156 | hsa:4215   | MAP3K3  | IPI00017801 | 4.410487 |
| hsa:10910 | SUGT1   | IPI00828150 | hsa:4215   | MAP3K3  | IPI00017801 | 4.410487 |
| hsa:79657 | RPAP3   | IPI00002408 | hsa:4215   | MAP3K3  | IPI00017801 | 4.410487 |
| hsa:10273 | STUB1   | IPI00025156 | hsa:9020   | MAP3K14 | IPI00016099 | 4.410487 |
| hsa:10188 | TNK2    | IPI00167089 | hsa:8867   | SYNJ1   | IPI00012441 | 4.410487 |
| hsa:25865 | PRKD2   | IPI00009334 | hsa:6625   | SNRP70  | IPI00290204 | 4.410487 |
| hsa:3717  | JAK2    | IPI00031016 | hsa:10146  | G3BP1   | IPI00012442 | 4.410487 |
| hsa:2534  | FYN     | IPI00219012 | hsa:10146  | G3BP1   | IPI00012442 | 4.410487 |
| hsa:4214  | MAP3K1  | IPI00855985 | hsa:2099   | ESR1    | IPI00294982 | 4.410487 |
| hsa:25865 | PRKD2   | IPI00009334 | hsa:6256   | RXRA    | IPI00418394 | 4.410487 |
| hsa:25865 | PRKD2   | IPI00009334 | hsa:5915   | RARB    | IPI00022989 | 4.410487 |
| hsa:6449  | SGTA    | IPI00013949 | hsa:9641   | IKBKE   | IPI00029045 | 4.410487 |
| hsa:4678  | NASP    | IPI00179953 | hsa:9641   | IKBKE   | IPI00029045 | 4.410487 |
| hsa:23043 | TNIK    | IPI00145805 | hsa:10097  | ACTR2   | IPI00005159 | 4.410487 |
| hsa:3611  | ILK     | IPI00013219 | hsa:22827  | PUF60   | IPI00069750 | 4.410487 |
| hsa:8473  | OGT     | IPI00005780 | hsa:1017   | CDK2    | IPI00031681 | 4.410487 |
| hsa:10963 | STIP1   | IPI00013894 | hsa:9641   | IKBKE   | IPI00029045 | 4.410487 |
| hsa:10953 | TOMM34  | IPI00009946 | hsa:9641   | IKBKE   | IPI00029045 | 4.410487 |
| hsa:6767  | ST13    | IPI00032826 | hsa:9641   | IKBKE   | IPI00029045 | 4.410487 |
| hsa:8576  | STK16   | IPI00872027 | hsa:3172   | HNF4A   | IPI00013196 | 4.410487 |
| hsa:1019  | CDK4    | IPI00007811 | hsa:57180  | ACTR3B  | IPI00872364 | 4.410487 |
| hsa:3611  | ILK     | IPI00013219 | hsa:3191   | HNRNPL  | IPI00465225 | 4.410487 |
| hsa:2932  | GSK3B   | IPI00028570 | hsa:6625   | SNRP70  | IPI00290204 | 4.410487 |
| hsa:9641  | IKBKE   | IPI00029045 | hsa:10642  | IGF2BP1 | IPI00008557 | 4.410487 |
| hsa:6446  | SGK     | IPI00297590 | hsa:26986  | PABPC1  | IPI00008524 | 4.410487 |

|            |              |             |            |           |             |          |
|------------|--------------|-------------|------------|-----------|-------------|----------|
| hsa:9641   | IKBKE        | IPI00029045 | hsa:11052  | CPSF6     | IPI00012998 | 4.410487 |
| hsa:9641   | IKBKE        | IPI00029045 | hsa:10525  | HYOU1     | IPI00000877 | 4.410487 |
| hsa:8767   | RIPK2        | IPI00021917 | hsa:220988 | HNRPA3    | IPI00419373 | 4.410487 |
| hsa:8428   | STK24        | IPI00002212 | hsa:3189   | HNRPH3    | IPI00013877 | 4.410487 |
| hsa:440275 | EIF2AK4      | IPI00163851 | hsa:2130   | EWSR1     | IPI00872855 | 4.410487 |
| hsa:1326   | MAP3K8       | IPI00298726 | hsa:3309   | HSPA5     | IPI00003362 | 4.410487 |
| hsa:1326   | MAP3K8       | IPI00298726 | hsa:3313   | HSPA9     | IPI00007765 | 4.410487 |
| hsa:1147   | CHUK         | IPI00005104 | hsa:3313   | HSPA9     | IPI00007765 | 4.410487 |
| hsa:1147   | CHUK         | IPI00005104 | hsa:71     | ACTG1     | unknown     | 4.410487 |
| hsa:996    | CDC27        | IPI00294575 | hsa:4751   | NEK2      | IPI00021331 | 4.410487 |
| hsa:6714   | SRC          | IPI00641230 | hsa:1027   | CDKN1B    | IPI00006991 | 4.410487 |
| hsa:1020   | CDK5         | IPI00023530 | hsa:1026   | CDKN1A    | IPI00009384 | 4.410487 |
| hsa:5601   | MAPK9        | IPI00024673 | hsa:10262  | SF3B4     | IPI00017339 | 4.410487 |
| hsa:6733   | SRPK2        | IPI00333420 | hsa:11338  | U2AF2     | IPI00031556 | 4.410487 |
| hsa:56159  | TEX11        | IPI00307536 | hsa:143379 | C10orf82  | IPI00143752 | 4.410487 |
| hsa:27330  | RPS6KA6      | IPI00007123 | hsa:3164   | NR4A1     | IPI00743108 | 4.410487 |
| hsa:2261   | FGFR3        | IPI00027174 | hsa:3191   | HNRPL     | IPI00465225 | 4.410487 |
| hsa:4145   | MATK         | IPI00000868 | hsa:2130   | EWSR1     | IPI00872855 | 4.410487 |
| hsa:440275 | EIF2AK4      | IPI00163851 | hsa:2130   | EWSR1     | IPI00872855 | 4.410487 |
| hsa:11040  | PIM2         | IPI00332692 | hsa:3189   | HNRPH3    | IPI00013877 | 4.410487 |
| hsa:4678   | NASP         | IPI00179953 | hsa:9706   | ULK2      | IPI00479399 | 4.410487 |
| hsa:5781   | PTPN11       | IPI00658023 | hsa:6714   | SRC       | IPI00641230 | 4.405273 |
| hsa:5781   | PTPN11       | IPI00658023 | hsa:2534   | FYN       | IPI00219012 | 4.405273 |
| hsa:5777   | PTPN6        | IPI00218604 | hsa:3932   | LCK       | IPI00394952 | 4.405273 |
| hsa:5781   | PTPN11       | IPI00658023 | hsa:3932   | LCK       | IPI00394952 | 4.405273 |
| hsa:5777   | PTPN6        | IPI00218604 | hsa:6714   | SRC       | IPI00641230 | 4.405273 |
| hsa:5777   | PTPN6        | IPI00218604 | hsa:25     | ABL129892 | IPI00216969 | 4.405273 |
| hsa:5777   | PTPN6        | IPI00218604 | hsa:4067   | LYN       | IPI00298625 | 4.405273 |
| hsa:5338   | PLD2         | IPI00024727 | hsa:5335   | PLCG1     | IPI00016736 | 4.398215 |
| hsa:2549   | GAB1         | IPI00031068 | hsa:5336   | PLCG2     | IPI00329185 | 4.398215 |
| hsa:9846   | GAB2         | IPI00186990 | hsa:5336   | PLCG2     | IPI00329185 | 4.398215 |
| hsa:1796   | DOK1         | IPI00015287 | hsa:5335   | PLCG1     | IPI00016736 | 4.398215 |
| hsa:1759   | DNM1         | IPI00873844 | hsa:5335   | PLCG1     | IPI00016736 | 4.398215 |
| hsa:2549   | GAB1         | IPI00031068 | hsa:5335   | PLCG1     | IPI00016736 | 4.398215 |
| hsa:8660   | IRS2         | IPI00464978 | hsa:5335   | PLCG1     | IPI00016736 | 4.398215 |
| hsa:3119   | HLA-DQB1     | IPI00005186 | hsa:920    | CD4       | IPI00003983 | 4.391914 |
| hsa:10188  | TNK2         | IPI00167089 | hsa:255426 | RASGEF1C  | IPI00300415 | 4.387151 |
| hsa:5566   | PRKACA730418 | IPI00396630 | hsa:3757   | KCNH2     | IPI00029662 | 4.34748  |
| hsa:6714   | SRC          | IPI00641230 | hsa:3265   | HRAS      | IPI00000006 | 4.34461  |
| hsa:25     | ABL129892    | IPI00216969 | hsa:5901   | RAN       | IPI00643041 | 4.34461  |
| hsa:2534   | FYN          | IPI00219012 | hsa:3265   | HRAS      | IPI00000006 | 4.34461  |
| hsa:4294   | MAP3K10      | IPI00295401 | hsa:998    | CDC42     | IPI00007189 | 4.34461  |
| hsa:10188  | TNK2         | IPI00167089 | hsa:998    | CDC42     | IPI00007189 | 4.34461  |
| hsa:4296   | MAP3K11      | IPI00000977 | hsa:391    | RHOG      | IPI00017342 | 4.34461  |
| hsa:2444   | FRK          | IPI00000885 | hsa:5879   | RAC1      | IPI00010271 | 4.34461  |
| hsa:27     | ABL2         | IPI00329488 | hsa:3265   | HRAS      | IPI00000006 | 4.34461  |
| hsa:4296   | MAP3K11      | IPI00000977 | hsa:5879   | RAC1      | IPI00010271 | 4.34461  |
| hsa:4296   | MAP3K11      | IPI00000977 | hsa:998    | CDC42     | IPI00007189 | 4.34461  |
| hsa:2242   | FES          | IPI00294344 | hsa:5921   | RASA1     | IPI00026262 | 4.327594 |
| hsa:6850   | SYK          | IPI00018597 | hsa:5921   | RASA1     | IPI00026262 | 4.327594 |
| hsa:7535   | ZAP70        | IPI00329789 | hsa:5921   | RASA1     | IPI00026262 | 4.327594 |
| hsa:5058   | PAK1         | IPI00656138 | hsa:660    | BMX       | IPI00020899 | 4.307534 |
| hsa:3454   | IFNAR1       | IPI00012877 | hsa:1399   | CRKL      | IPI00004839 | 4.307385 |
| hsa:3454   | IFNAR1       | IPI00012877 | hsa:6773   | STAT2     | IPI00004312 | 4.307385 |
| hsa:3454   | IFNAR1       | IPI00012877 | hsa:5295   | PIK3R1    | IPI00021448 | 4.307385 |
| hsa:3572   | IL6ST        | IPI00297124 | hsa:9021   | SOCS3     | IPI00297349 | 4.307385 |
| hsa:3572   | IL6ST        | IPI00297124 | hsa:7409   | VAV1      | IPI00011696 | 4.307385 |
| hsa:2690   | GHR          | IPI00023599 | hsa:1154   | CISH      | IPI00017281 | 4.307385 |
| hsa:2690   | GHR          | IPI00023599 | hsa:6464   | SHC1      | IPI00645103 | 4.307385 |
| hsa:2690   | GHR          | IPI00023599 | hsa:6777   | STAT5B    | IPI00103415 | 4.307385 |

|            |            |             |           |              |             |          |
|------------|------------|-------------|-----------|--------------|-------------|----------|
| hsa:2690   | GHR        | IPI00023599 | hsa:9021  | SOCS3        | IPI00297349 | 4.307385 |
| hsa:2690   | GHR        | IPI00023599 | hsa:8651  | SOCS1        | IPI00021491 | 4.307385 |
| hsa:2690   | GHR        | IPI00023599 | hsa:2887  | GRB10        | IPI00012752 | 4.307385 |
| hsa:2690   | GHR        | IPI00023599 | hsa:6776  | STAT5A       | IPI00030783 | 4.307385 |
| hsa:2690   | GHR        | IPI00023599 | hsa:8835  | SOCS2        | IPI00033944 | 4.307385 |
| hsa:2690   | GHR        | IPI00023599 | hsa:5295  | PIK3R1       | IPI00021448 | 4.307385 |
| hsa:2690   | GHR        | IPI00023599 | hsa:2885  | GRB2         | IPI00021327 | 4.307385 |
| hsa:3953   | LEPR       | IPI00009243 | hsa:9021  | SOCS3        | IPI00297349 | 4.307385 |
| hsa:2057   | EPOR       | IPI00017476 | hsa:10603 | SH2B2        | IPI00155706 | 4.307385 |
| hsa:2057   | EPOR       | IPI00017476 | hsa:3635  | INPP5D646743 | IPI00329213 | 4.307385 |
| hsa:2057   | EPOR       | IPI00017476 | hsa:6777  | STAT5B       | IPI00103415 | 4.307385 |
| hsa:2057   | EPOR       | IPI00017476 | hsa:5336  | PLCG2        | IPI00329185 | 4.307385 |
| hsa:2057   | EPOR       | IPI00017476 | hsa:8835  | SOCS2        | IPI00033944 | 4.307385 |
| hsa:2057   | EPOR       | IPI00017476 | hsa:10750 | GRAP         | IPI00013864 | 4.307385 |
| hsa:2057   | EPOR       | IPI00017476 | hsa:9021  | SOCS3        | IPI00297349 | 4.307385 |
| hsa:2057   | EPOR       | IPI00017476 | hsa:1154  | CISH         | IPI00017281 | 4.307385 |
| hsa:2057   | EPOR       | IPI00017476 | hsa:1399  | CRKL         | IPI00004839 | 4.307385 |
| hsa:2057   | EPOR       | IPI00017476 | hsa:6776  | STAT5A       | IPI00030783 | 4.307385 |
| hsa:1441   | CSF3R      | IPI00012936 | hsa:3635  | INPP5D646743 | IPI00329213 | 4.307385 |
| hsa:1441   | CSF3R      | IPI00012936 | hsa:1154  | CISH         | IPI00017281 | 4.307385 |
| hsa:1441   | CSF3R      | IPI00012936 | hsa:9021  | SOCS3        | IPI00297349 | 4.307385 |
| hsa:3561   | IL2RG      | IPI00012899 | hsa:6461  | SHB          | IPI00604688 | 4.307385 |
| hsa:5618   | PRLR       | IPI00028640 | hsa:8835  | SOCS2        | IPI00033944 | 4.307385 |
| hsa:5618   | PRLR       | IPI00028640 | hsa:1154  | CISH         | IPI00017281 | 4.307385 |
| hsa:1439   | CSF2RB     | IPI00465234 | hsa:1154  | CISH         | IPI00017281 | 4.307385 |
| hsa:3566   | IL4R       | IPI00444383 | hsa:6778  | STAT6        | IPI00030782 | 4.307385 |
| hsa:3566   | IL4R       | IPI00444383 | hsa:9655  | SOCS5        | IPI00022271 | 4.307385 |
| hsa:1441   | CSF3R      | IPI00012936 | hsa:6774  | STAT3        | IPI00784414 | 4.307385 |
| hsa:3575   | IL7R       | IPI00292014 | hsa:6774  | STAT3        | IPI00784414 | 4.307385 |
| hsa:1439   | CSF2RB     | IPI00465234 | hsa:6774  | STAT3        | IPI00784414 | 4.307385 |
| hsa:149233 | IL23R      | IPI00303045 | hsa:6774  | STAT3        | IPI00784414 | 4.307385 |
| hsa:3454   | IFNAR1     | IPI00012877 | hsa:6774  | STAT3        | IPI00784414 | 4.307385 |
| hsa:3953   | LEPR       | IPI00009243 | hsa:6774  | STAT3        | IPI00784414 | 4.307385 |
| hsa:2690   | GHR        | IPI00023599 | hsa:6774  | STAT3        | IPI00784414 | 4.307385 |
| hsa:3572   | IL6ST      | IPI00297124 | hsa:6774  | STAT3        | IPI00784414 | 4.307385 |
| hsa:9466   | IL27RA     | IPI00792287 | hsa:6772  | STAT1        | IPI00030781 | 4.307385 |
| hsa:3561   | IL2RG      | IPI00012899 | hsa:6772  | STAT1        | IPI00030781 | 4.307385 |
| hsa:1439   | CSF2RB     | IPI00465234 | hsa:6772  | STAT1        | IPI00030781 | 4.307385 |
| hsa:4352   | MPL        | IPI00027637 | hsa:6464  | SHC1         | IPI00645103 | 4.307385 |
| hsa:3561   | IL2RG      | IPI00012899 | hsa:6464  | SHC1         | IPI00645103 | 4.307385 |
| hsa:1439   | CSF2RB     | IPI00465234 | hsa:6464  | SHC1         | IPI00645103 | 4.307385 |
| hsa:3691   | ITGB4      | IPI00027422 | hsa:6464  | SHC1         | IPI00645103 | 4.307385 |
| hsa:1441   | CSF3R      | IPI00012936 | hsa:6464  | SHC1         | IPI00645103 | 4.307385 |
| hsa:3566   | IL4R       | IPI00444383 | hsa:6464  | SHC1         | IPI00645103 | 4.307385 |
| hsa:2057   | EPOR       | IPI00017476 | hsa:6464  | SHC1         | IPI00645103 | 4.307385 |
| hsa:2057   | EPOR       | IPI00017476 | hsa:5335  | PLCG1        | IPI00016736 | 4.307385 |
| hsa:3977   | LIFR       | IPI00444272 | hsa:5335  | PLCG1        | IPI00016736 | 4.307385 |
| hsa:5618   | PRLR       | IPI00028640 | hsa:7409  | VAV1         | IPI00011696 | 4.307385 |
| hsa:2057   | EPOR       | IPI00017476 | hsa:7409  | VAV1         | IPI00011696 | 4.307385 |
| hsa:3691   | ITGB4      | IPI00027422 | hsa:2885  | GRB2         | IPI00021327 | 4.307385 |
| hsa:1441   | CSF3R      | IPI00012936 | hsa:2885  | GRB2         | IPI00021327 | 4.307385 |
| hsa:2057   | EPOR       | IPI00017476 | hsa:2885  | GRB2         | IPI00021327 | 4.307385 |
| hsa:3575   | IL7R       | IPI00292014 | hsa:5295  | PIK3R1       | IPI00021448 | 4.307385 |
| hsa:1438   | CSF2RA1438 | IPI00012009 | hsa:5295  | PIK3R1       | IPI00021448 | 4.307385 |
| hsa:2057   | EPOR       | IPI00017476 | hsa:5295  | PIK3R1       | IPI00021448 | 4.307385 |
| hsa:5618   | PRLR       | IPI00028640 | hsa:7410  | VAV2         | IPI00446303 | 4.307385 |
| hsa:3575   | IL7R       | IPI00292014 | hsa:6776  | STAT5A       | IPI00030783 | 4.307385 |
| hsa:3561   | IL2RG      | IPI00012899 | hsa:6776  | STAT5A       | IPI00030783 | 4.307385 |
| hsa:5618   | PRLR       | IPI00028640 | hsa:9021  | SOCS3        | IPI00297349 | 4.307385 |
| hsa:4352   | MPL        | IPI00027637 | hsa:8651  | SOCS1        | IPI00021491 | 4.307385 |



|            |          |             |           |              |             |          |
|------------|----------|-------------|-----------|--------------|-------------|----------|
| hsa:3566   | IL4R     | IPI00444383 | hsa:3635  | INPP5D646743 | IPI00329213 | 4.307385 |
| hsa:3575   | IL7R     | IPI00292014 | hsa:6777  | STAT5B       | IPI00103415 | 4.307385 |
| hsa:3595   | IL12RB2  | IPI00438855 | hsa:6775  | STAT4        | IPI00000106 | 4.307385 |
| hsa:3594   | IL12RB1  | IPI00001400 | hsa:6775  | STAT4        | IPI00000106 | 4.307385 |
| hsa:5058   | PAK1     | IPI00656138 | hsa:9181  | ARHGEF2      | IPI00472160 | 4.293897 |
| hsa:6714   | SRC      | IPI00641230 | hsa:2059  | EPS8         | IPI00290337 | 4.266439 |
| hsa:567    | B2M      | IPI00004656 | hsa:10859 | LILRB1       | IPI00643313 | 4.242719 |
| hsa:3055   | HCK      | IPI00646510 | hsa:7409  | VAV1         | IPI00011696 | 4.218668 |
| hsa:3932   | LCK      | IPI00394952 | hsa:7409  | VAV1         | IPI00011696 | 4.218668 |
| hsa:2534   | FYN      | IPI00219012 | hsa:7409  | VAV1         | IPI00011696 | 4.218668 |
| hsa:1432   | MAPK14   | IPI00002857 | hsa:1386  | ATF2         | IPI00748604 | 4.211403 |
| hsa:5599   | MAPK8    | IPI00024672 | hsa:1386  | ATF2         | IPI00748604 | 4.211403 |
| hsa:9252   | RPS6KA5  | IPI00335101 | hsa:1386  | ATF2         | IPI00748604 | 4.211403 |
| hsa:1457   | CSNK2A1  | IPI00744507 | hsa:1386  | ATF2         | IPI00748604 | 4.211403 |
| hsa:1459   | CSNK2A2  | IPI00020602 | hsa:1386  | ATF2         | IPI00748604 | 4.211403 |
| hsa:5601   | MAPK9    | IPI00024673 | hsa:11016 | ATF7         | IPI00015147 | 4.211403 |
| hsa:8550   | MAPKAPK5 | IPI00160672 | hsa:1386  | ATF2         | IPI00748604 | 4.211403 |
| hsa:5603   | MAPK13   | IPI00005741 | hsa:1386  | ATF2         | IPI00748604 | 4.211403 |
| hsa:5600   | MAPK11   | IPI00019473 | hsa:1386  | ATF2         | IPI00748604 | 4.211403 |
| hsa:5601   | MAPK9    | IPI00024673 | hsa:1386  | ATF2         | IPI00748604 | 4.211403 |
| hsa:1263   | PLK3     | IPI00304186 | hsa:5604  | MAP2K1       | IPI00219604 | 4.189963 |
| hsa:7535   | ZAP70    | IPI00329789 | hsa:6654  | SOS1         | IPI00020131 | 4.168807 |
| hsa:5788   | PTPRC    | IPI00844079 | hsa:5777  | PTPN6        | IPI00218604 | 4.135241 |
| hsa:5058   | PAK1     | IPI00656138 | hsa:3984  | LIMK1        | IPI00291702 | 4.113949 |
| hsa:10298  | PAK4     | IPI00014068 | hsa:3984  | LIMK1        | IPI00291702 | 4.113949 |
| hsa:10114  | HIPK3    | IPI00099522 | hsa:3985  | LIMK2        | IPI00022872 | 4.113949 |
| hsa:5062   | PAK2     | IPI00787208 | hsa:3984  | LIMK1        | IPI00291702 | 4.113949 |
| hsa:695    | BTK      | IPI00029132 | hsa:27071 | DAPP1        | IPI00384620 | 4.10641  |
| hsa:695    | BTK      | IPI00029132 | hsa:10603 | SH2B2        | IPI00155706 | 4.10641  |
| hsa:7006   | TEC      | IPI00000878 | hsa:26228 | STAP1        | IPI00015876 | 4.10641  |
| hsa:55379  | LRRC59   | IPI00396321 | hsa:3106  | HLA-B        | unknown     | 4.084589 |
| hsa:55631  | LRRC40   | IPI00152998 | hsa:3106  | HLA-B        | unknown     | 4.084589 |
| hsa:57787  | MARK4    | IPI00064797 | hsa:5584  | PRKCI        | IPI00016639 | 4.075187 |
| hsa:5795   | PTPRJ    | IPI00847732 | hsa:4233  | MET          | IPI00029273 | 4.061489 |
| hsa:5800   | PTPRO    | IPI00241041 | hsa:5292  | PIM1         | IPI00005014 | 4.061489 |
| hsa:284217 | LAMA1    | IPI00375294 | hsa:3339  | HSPG2        | IPI00024284 | 4.053636 |
| hsa:4215   | MAP3K3   | IPI00017801 | hsa:3551  | IKBKB        | IPI00024709 | 4.042947 |
| hsa:4215   | MAP3K3   | IPI00017801 | hsa:1147  | CHUK         | IPI00005104 | 4.042947 |
| hsa:2242   | FES      | IPI00294344 | hsa:22821 | RASA3        | IPI00032267 | 4.028793 |
| hsa:2885   | GRB2     | IPI00021327 | hsa:5921  | RASA1        | IPI00026262 | 4.024591 |
| hsa:4690   | NCK1     | IPI00028065 | hsa:5921  | RASA1        | IPI00026262 | 4.024591 |
| hsa:3717   | JAK2     | IPI00031016 | hsa:7409  | VAV1         | IPI00011696 | 4.010276 |
| hsa:6850   | SYK      | IPI00018597 | hsa:7410  | VAV2         | IPI00446303 | 4.010276 |
| hsa:6850   | SYK      | IPI00018597 | hsa:7409  | VAV1         | IPI00011696 | 4.010276 |
| hsa:7535   | ZAP70    | IPI00329789 | hsa:7409  | VAV1         | IPI00011696 | 4.010276 |
| hsa:7297   | TYK2     | IPI00022353 | hsa:7409  | VAV1         | IPI00011696 | 4.010276 |
| hsa:1852   | DUSP9    | IPI00294486 | hsa:1432  | MAPK14       | IPI00002857 | 4.00525  |
| hsa:1849   | DUSP7    | IPI00394738 | hsa:1432  | MAPK14       | IPI00002857 | 4.00525  |
| hsa:11221  | DUSP10   | IPI00026987 | hsa:1432  | MAPK14       | IPI00002857 | 4.00525  |
| hsa:80824  | DUSP16   | IPI00028428 | hsa:1432  | MAPK14       | IPI00002857 | 4.00525  |
| hsa:51657  | STYXL1   | IPI00007125 | hsa:7046  | TGFBR1       | IPI00005733 | 4.00525  |
| hsa:1852   | DUSP9    | IPI00294486 | hsa:5594  | MAPK1        | IPI00003479 | 4.00525  |
| hsa:1848   | DUSP6    | IPI00004390 | hsa:5594  | MAPK1        | IPI00003479 | 4.00525  |
| hsa:80824  | DUSP16   | IPI00028428 | hsa:5594  | MAPK1        | IPI00003479 | 4.00525  |
| hsa:1849   | DUSP7    | IPI00394738 | hsa:5594  | MAPK1        | IPI00003479 | 4.00525  |
| hsa:1849   | DUSP7    | IPI00394738 | hsa:5599  | MAPK8        | IPI00024672 | 4.00525  |
| hsa:11221  | DUSP10   | IPI00026987 | hsa:5599  | MAPK8        | IPI00024672 | 4.00525  |
| hsa:80824  | DUSP16   | IPI00028428 | hsa:5599  | MAPK8        | IPI00024672 | 4.00525  |
| hsa:1852   | DUSP9    | IPI00294486 | hsa:5595  | MAPK3        | IPI00018195 | 4.00525  |
| hsa:11221  | DUSP10   | IPI00026987 | hsa:5595  | MAPK3        | IPI00018195 | 4.00525  |

|           |         |             |           |         |             |          |
|-----------|---------|-------------|-----------|---------|-------------|----------|
| hsa:1848  | DUSP6   | IPI00004390 | hsa:5595  | MAPK3   | IPI00018195 | 4.00525  |
| hsa:11221 | DUSP10  | IPI00026987 | hsa:5602  | MAPK10  | IPI00023547 | 4.00525  |
| hsa:80824 | DUSP16  | IPI00028428 | hsa:5602  | MAPK10  | IPI00023547 | 4.00525  |
| hsa:80824 | DUSP16  | IPI00028428 | hsa:5601  | MAPK9   | IPI00024673 | 4.00525  |
| hsa:11221 | DUSP10  | IPI00026987 | hsa:5600  | MAPK11  | IPI00019473 | 4.00525  |
| hsa:80824 | DUSP16  | IPI00028428 | hsa:5600  | MAPK11  | IPI00019473 | 4.00525  |
| hsa:6714  | SRC     | IPI00641230 | hsa:7074  | TIAM1   | IPI00011400 | 3.972906 |
| hsa:5590  | PRK CZ  | IPI00013749 | hsa:5604  | MAP2K1  | IPI00219604 | 3.957832 |
| hsa:8986  | RPS6KA4 | IPI00022536 | hsa:5604  | MAP2K1  | IPI00219604 | 3.957832 |
| hsa:6196  | RPS6KA2 | IPI00300321 | hsa:5604  | MAP2K1  | IPI00219604 | 3.957832 |
| hsa:11183 | MAP4K5  | IPI00294842 | hsa:613   | BCR     | IPI00004497 | 3.953405 |
| hsa:2017  | CTTN    | IPI00029601 | hsa:1785  | DNM2    | IPI00033022 | 3.948436 |
| hsa:2017  | CTTN    | IPI00029601 | hsa:1759  | DNM1    | IPI00873844 | 3.948436 |
| hsa:7159  | TP53BP2 | IPI00337588 | hsa:11060 | WWP2    | IPI00013010 | 3.948436 |
| hsa:7159  | TP53BP2 | IPI00337588 | hsa:11059 | WWP1    | IPI00013009 | 3.948436 |
| hsa:1793  | DOCK1   | IPI00015286 | hsa:63916 | ELMO2   | IPI00260090 | 3.948436 |
| hsa:4688  | NCF2    | IPI00021070 | hsa:84958 | SYTL1   | IPI00217789 | 3.948436 |
| hsa:2533  | FYB     | IPI00446986 | hsa:8935  | SKAP2   | IPI00022508 | 3.948436 |
| hsa:30011 | SH3KBP1 | IPI00294962 | hsa:4734  | NEDD4   | IPI00009322 | 3.948436 |
| hsa:30011 | SH3KBP1 | IPI00294962 | hsa:5290  | PIK3CA  | IPI00031386 | 3.948436 |
| hsa:4739  | NEDD9   | IPI00031407 | hsa:83737 | ITCH    | IPI00061780 | 3.948436 |
| hsa:273   | AMPH    | IPI00305486 | hsa:1785  | DNM2    | IPI00033022 | 3.948436 |
| hsa:6456  | SH3GL2  | IPI00019171 | hsa:1785  | DNM2    | IPI00033022 | 3.948436 |
| hsa:51429 | SNX9    | IPI00001883 | hsa:1759  | DNM1    | IPI00873844 | 3.948436 |
| hsa:23048 | FBNP1   | IPI00807625 | hsa:1785  | DNM2    | IPI00033022 | 3.948436 |
| hsa:274   | BIN1    | IPI00186966 | hsa:5338  | PLD2    | IPI00024727 | 3.948436 |
| hsa:273   | AMPH    | IPI00305486 | hsa:5338  | PLD2    | IPI00024727 | 3.948436 |
| hsa:274   | BIN1    | IPI00186966 | hsa:1785  | DNM2    | IPI00033022 | 3.948436 |
| hsa:51100 | SH3GLB1 | IPI00006558 | hsa:1785  | DNM2    | IPI00033022 | 3.948436 |
| hsa:51429 | SNX9    | IPI00001883 | hsa:1785  | DNM2    | IPI00033022 | 3.948436 |
| hsa:23048 | FBNP1   | IPI00807625 | hsa:1759  | DNM1    | IPI00873844 | 3.948436 |
| hsa:29763 | PACSIN3 | IPI00329572 | hsa:1759  | DNM1    | IPI00873844 | 3.948436 |
| hsa:29993 | PACSIN1 | IPI00011515 | hsa:1759  | DNM1    | IPI00873844 | 3.948436 |
| hsa:6456  | SH3GL2  | IPI00019171 | hsa:1759  | DNM1    | IPI00873844 | 3.948436 |
| hsa:6457  | SH3GL3  | IPI00019172 | hsa:1759  | DNM1    | IPI00873844 | 3.948436 |
| hsa:274   | BIN1    | IPI00186966 | hsa:1759  | DNM1    | IPI00873844 | 3.948436 |
| hsa:273   | AMPH    | IPI00305486 | hsa:1759  | DNM1    | IPI00873844 | 3.948436 |
| hsa:6455  | SH3GL1  | IPI00019169 | hsa:1759  | DNM1    | IPI00873844 | 3.948436 |
| hsa:2533  | FYB     | IPI00446986 | hsa:8631  | SKAP1   | IPI00289536 | 3.948436 |
| hsa:6456  | SH3GL2  | IPI00019171 | hsa:83737 | ITCH    | IPI00061780 | 3.948436 |
| hsa:54440 | CXorf9  | IPI00004504 | hsa:57154 | SMURF1  | IPI00217054 | 3.948436 |
| hsa:23048 | FBNP1   | IPI00807625 | hsa:26052 | DNM3    | IPI00221332 | 3.948436 |
| hsa:5797  | PTPRM   | IPI00293849 | hsa:5125  | PCSK5   | IPI00294862 | 3.94665  |
| hsa:6850  | SYK     | IPI00018597 | hsa:5296  | PIK3R2  | IPI00011736 | 3.935196 |
| hsa:5328  | PLAU    | IPI00296180 | hsa:6768  | ST14    | IPI00001922 | 3.920433 |
| hsa:4018  | LPA     | IPI00029168 | hsa:1990  | ELA1    | IPI00019729 | 3.920433 |
| hsa:4018  | LPA     | IPI00029168 | hsa:1991  | ELA2    | IPI00027769 | 3.920433 |
| hsa:5058  | PAK1    | IPI00656138 | hsa:207   | AKT1    | IPI00012866 | 3.913667 |
| hsa:5582  | PRKCG   | IPI00007128 | hsa:1856  | DVL2    | IPI00023103 | 3.897744 |
| hsa:5579  | PRKCB1  | IPI00010466 | hsa:1856  | DVL2    | IPI00023103 | 3.897744 |
| hsa:5578  | PRKCA   | IPI00385449 | hsa:1856  | DVL2    | IPI00023103 | 3.897744 |
| hsa:54472 | TOLLIP  | IPI00100154 | hsa:3654  | IRAK1   | IPI00293652 | 3.895931 |
| hsa:5787  | PTPRB   | IPI00295577 | hsa:4233  | MET     | IPI00029273 | 3.888611 |
| hsa:5794  | PTPRH   | IPI00760988 | hsa:5594  | MAPK1   | IPI00003479 | 3.888611 |
| hsa:5794  | PTPRH   | IPI00760988 | hsa:5747  | PTK2    | IPI00012885 | 3.888611 |
| hsa:5788  | PTPRC   | IPI00844079 | hsa:1457  | CSNK2A1 | IPI00744507 | 3.888611 |
| hsa:5788  | PTPRC   | IPI00844079 | hsa:1459  | CSNK2A2 | IPI00020602 | 3.888611 |
| hsa:3716  | JAK1    | IPI00443765 | hsa:10603 | SH2B2   | IPI00155706 | 3.870408 |
| hsa:3717  | JAK2    | IPI00031016 | hsa:25970 | SH2B1   | IPI00016441 | 3.870408 |
| hsa:3717  | JAK2    | IPI00031016 | hsa:10603 | SH2B2   | IPI00155706 | 3.870408 |

|            |        |             |           |         |             |          |
|------------|--------|-------------|-----------|---------|-------------|----------|
| hsa:3717   | JAK2   | IPI00031016 | hsa:55620 | STAP2   | IPI00383883 | 3.870408 |
| hsa:3717   | JAK2   | IPI00031016 | hsa:2887  | GRB10   | IPI00012752 | 3.870408 |
| hsa:6850   | SYK    | IPI00018597 | hsa:10603 | SH2B2   | IPI00155706 | 3.870408 |
| hsa:6850   | SYK    | IPI00018597 | hsa:6452  | SH3BP2  | IPI00218997 | 3.870408 |
| hsa:3718   | JAK3   | IPI00002773 | hsa:10603 | SH2B2   | IPI00155706 | 3.870408 |
| hsa:7535   | ZAP70  | IPI00329789 | hsa:6452  | SH3BP2  | IPI00218997 | 3.870408 |
| hsa:7535   | ZAP70  | IPI00329789 | hsa:10019 | SH2B3   | IPI00010821 | 3.870408 |
| hsa:55423  | SIRPG  | IPI00032061 | hsa:961   | CD47    | IPI00374740 | 3.864441 |
| hsa:140885 | SIRPA  | IPI00656087 | hsa:3556  | IL1RAP  | IPI00031789 | 3.864441 |
| hsa:941    | CD80   | IPI00015914 | hsa:940   | CD28    | IPI00022339 | 3.864441 |
| hsa:140885 | SIRPA  | IPI00656087 | hsa:961   | CD47    | IPI00374740 | 3.864441 |
| hsa:1462   | VCAN   | IPI00009802 | hsa:2200  | FBN1    | IPI00328113 | 3.850265 |
| hsa:5335   | PLCG1  | IPI00016736 | hsa:8525  | DGKZ    | IPI00013835 | 3.85004  |
| hsa:22983  | MAST1  | IPI00027883 | hsa:6640  | SNTA1   | IPI00164528 | 3.821611 |
| hsa:22983  | MAST1  | IPI00027883 | hsa:6645  | SNTB2   | IPI00009505 | 3.821611 |
| hsa:23139  | MAST2  | IPI00514071 | hsa:6645  | SNTB2   | IPI00009505 | 3.821611 |
| hsa:6709   | SPTAN1 | IPI00844215 | hsa:50944 | SHANK1  | IPI00007695 | 3.81383  |
| hsa:3055   | HCK    | IPI00646510 | hsa:8935  | SKAP2   | IPI00022508 | 3.790036 |
| hsa:3932   | LCK    | IPI00394952 | hsa:8631  | SKAP1   | IPI00289536 | 3.790036 |
| hsa:6714   | SRC    | IPI00641230 | hsa:8631  | SKAP1   | IPI00289536 | 3.790036 |
| hsa:4067   | LYN    | IPI00298625 | hsa:8935  | SKAP2   | IPI00022508 | 3.790036 |
| hsa:4067   | LYN    | IPI00298625 | hsa:8631  | SKAP1   | IPI00289536 | 3.790036 |
| hsa:2534   | FYN    | IPI00219012 | hsa:8935  | SKAP2   | IPI00022508 | 3.790036 |
| hsa:2534   | FYN    | IPI00219012 | hsa:8631  | SKAP1   | IPI00289536 | 3.790036 |
| hsa:8573   | CASK   | IPI00514301 | hsa:5864  | RAB3A   | IPI00023504 | 3.787266 |
| hsa:3636   | INPPL1 | IPI00016932 | hsa:10174 | SORBS3  | IPI00419847 | 3.776765 |
| hsa:3636   | INPPL1 | IPI00016932 | hsa:10580 | SORBS1  | IPI00186452 | 3.776765 |
| hsa:3636   | INPPL1 | IPI00016932 | hsa:9564  | BCAR1   | IPI00872386 | 3.776765 |
| hsa:2885   | GRB2   | IPI00021327 | hsa:30011 | SH3KBP1 | IPI00294962 | 3.776765 |
| hsa:2885   | GRB2   | IPI00021327 | hsa:23607 | CD2AP   | IPI00412771 | 3.776765 |
| hsa:2885   | GRB2   | IPI00021327 | hsa:51517 | NCKIPSD | IPI00009319 | 3.776765 |
| hsa:5295   | PIK3R1 | IPI00021448 | hsa:1398  | CRK     | IPI00004838 | 3.776765 |
| hsa:5295   | PIK3R1 | IPI00021448 | hsa:10451 | VAV3    | IPI00299763 | 3.776765 |
| hsa:5295   | PIK3R1 | IPI00021448 | hsa:23607 | CD2AP   | IPI00412771 | 3.776765 |
| hsa:5295   | PIK3R1 | IPI00021448 | hsa:9564  | BCAR1   | IPI00872386 | 3.776765 |
| hsa:5295   | PIK3R1 | IPI00021448 | hsa:1399  | CRKL    | IPI00004839 | 3.776765 |
| hsa:5295   | PIK3R1 | IPI00021448 | hsa:30011 | SH3KBP1 | IPI00294962 | 3.776765 |
| hsa:1398   | CRK    | IPI00004838 | hsa:4739  | NEDD9   | IPI00031407 | 3.776765 |
| hsa:29760  | BLNK   | IPI00002434 | hsa:1399  | CRKL    | IPI00004839 | 3.776765 |
| hsa:29760  | BLNK   | IPI00002434 | hsa:4690  | NCK1    | IPI00028065 | 3.776765 |
| hsa:29760  | BLNK   | IPI00002434 | hsa:30011 | SH3KBP1 | IPI00294962 | 3.776765 |
| hsa:1399   | CRKL   | IPI00004839 | hsa:4739  | NEDD9   | IPI00031407 | 3.776765 |
| hsa:1399   | CRKL   | IPI00004839 | hsa:1794  | DOCK2   | IPI00022449 | 3.776765 |
| hsa:4068   | SH2D1A | IPI00032401 | hsa:2533  | FYB     | IPI00446986 | 3.776765 |
| hsa:6461   | SHB    | IPI00604688 | hsa:9402  | GRAP2   | IPI00026928 | 3.776765 |
| hsa:3937   | LCP2   | IPI00297169 | hsa:10451 | VAV3    | IPI00299763 | 3.776765 |
| hsa:3937   | LCP2   | IPI00297169 | hsa:9402  | GRAP2   | IPI00026928 | 3.776765 |
| hsa:3937   | LCP2   | IPI00297169 | hsa:2533  | FYB     | IPI00446986 | 3.776765 |
| hsa:3937   | LCP2   | IPI00297169 | hsa:4690  | NCK1    | IPI00028065 | 3.776765 |
| hsa:8651   | SOCS1  | IPI00021491 | hsa:4690  | NCK1    | IPI00028065 | 3.776765 |
| hsa:30837  | SOCS7  | IPI00022329 | hsa:10174 | SORBS3  | IPI00419847 | 3.776765 |
| hsa:30837  | SOCS7  | IPI00022329 | hsa:4690  | NCK1    | IPI00028065 | 3.776765 |
| hsa:4690   | NCK1   | IPI00028065 | hsa:4739  | NEDD9   | IPI00031407 | 3.776765 |
| hsa:4690   | NCK1   | IPI00028065 | hsa:10006 | ABI1    | IPI00431025 | 3.776765 |
| hsa:63898  | SH2D4A | IPI00100731 | hsa:28988 | DBNL    | IPI00456925 | 3.776765 |
| hsa:8440   | NCK2   | IPI00306531 | hsa:10006 | ABI1    | IPI00431025 | 3.776765 |
| hsa:8440   | NCK2   | IPI00306531 | hsa:10152 | ABI2    | IPI00442210 | 3.776765 |
| hsa:3937   | LCP2   | IPI00297169 | hsa:10254 | STAM2   | IPI00290542 | 3.776765 |
| hsa:3937   | LCP2   | IPI00297169 | hsa:8027  | STAM    | IPI00020178 | 3.776765 |
| hsa:2885   | GRB2   | IPI00021327 | hsa:2017  | CTTN    | IPI00029601 | 3.776765 |

|           |              |             |            |          |             |          |
|-----------|--------------|-------------|------------|----------|-------------|----------|
| hsa:63898 | SH2D4A       | IPI00100731 | hsa:3059   | HCLS1    | IPI00026156 | 3.776765 |
| hsa:29760 | BLNK         | IPI00002434 | hsa:2885   | GRB2     | IPI00021327 | 3.776765 |
| hsa:8651  | SOCS1        | IPI00021491 | hsa:2885   | GRB2     | IPI00021327 | 3.776765 |
| hsa:3937  | LCP2         | IPI00297169 | hsa:2885   | GRB2     | IPI00021327 | 3.776765 |
| hsa:6461  | SHB          | IPI00604688 | hsa:2885   | GRB2     | IPI00021327 | 3.776765 |
| hsa:4068  | SH2D1A       | IPI00032401 | hsa:2885   | GRB2     | IPI00021327 | 3.776765 |
| hsa:30837 | SOCS7        | IPI00022329 | hsa:2885   | GRB2     | IPI00021327 | 3.776765 |
| hsa:3635  | INPP5D646743 | IPI00329213 | hsa:2885   | GRB2     | IPI00021327 | 3.776765 |
| hsa:5295  | PIK3R1       | IPI00021448 | hsa:2885   | GRB2     | IPI00021327 | 3.776765 |
| hsa:1398  | CRK          | IPI00004838 | hsa:1795   | DOCK3    | IPI00217985 | 3.776765 |
| hsa:8440  | NCK2         | IPI00306531 | hsa:1793   | DOCK1    | IPI00015286 | 3.776765 |
| hsa:1398  | CRK          | IPI00004838 | hsa:1793   | DOCK1    | IPI00015286 | 3.776765 |
| hsa:6461  | SHB          | IPI00604688 | hsa:1398   | CRK      | IPI00004838 | 3.776765 |
| hsa:3635  | INPP5D646743 | IPI00329213 | hsa:1399   | CRKL     | IPI00004839 | 3.776765 |
| hsa:10045 | SH2D3A       | IPI00305020 | hsa:9564   | BCAR1    | IPI00872386 | 3.776765 |
| hsa:4690  | NCK1         | IPI00028065 | hsa:51517  | NCKIPSD  | IPI00009319 | 3.776765 |
| hsa:8440  | NCK2         | IPI00306531 | hsa:51517  | NCKIPSD  | IPI00009319 | 3.776765 |
| hsa:63898 | SH2D4A       | IPI00100731 | hsa:6455   | SH3GL1   | IPI00019169 | 3.776765 |
| hsa:79890 | RIN3         | IPI00745485 | hsa:274    | BIN1     | IPI00186966 | 3.776765 |
| hsa:8440  | NCK2         | IPI00306531 | hsa:10152  | ABI2     | IPI00442210 | 3.776765 |
| hsa:8440  | NCK2         | IPI00306531 | hsa:51517  | NCKIPSD  | IPI00009319 | 3.776765 |
| hsa:3937  | LCP2         | IPI00297169 | hsa:9402   | GRAP2    | IPI00026928 | 3.776765 |
| hsa:63898 | SH2D4A       | IPI00100731 | hsa:28988  | DBNL     | IPI00456925 | 3.776765 |
| hsa:63898 | SH2D4A       | IPI00100731 | hsa:3059   | HCLS1    | IPI00026156 | 3.776765 |
| hsa:63898 | SH2D4A       | IPI00100731 | hsa:6455   | SH3GL1   | IPI00019169 | 3.776765 |
| hsa:5792  | PTPRF        | IPI00107831 | hsa:3932   | LCK      | IPI00394952 | 3.770359 |
| hsa:5792  | PTPRF        | IPI00107831 | hsa:2534   | FYN      | IPI00219012 | 3.770359 |
| hsa:3932  | LCK          | IPI00394952 | hsa:50619  | DEF6     | IPI00004924 | 3.769506 |
| hsa:3055  | HCK          | IPI00646510 | hsa:22821  | RASA3    | IPI00032267 | 3.76487  |
| hsa:3689  | ITGB2        | IPI00291792 | hsa:3611   | ILK      | IPI00013219 | 3.75599  |
| hsa:3688  | ITGB1        | IPI00217563 | hsa:3611   | ILK      | IPI00013219 | 3.75599  |
| hsa:3690  | ITGB3        | IPI00303283 | hsa:3611   | ILK      | IPI00013219 | 3.75599  |
| hsa:5777  | PTPN6        | IPI00218604 | hsa:7535   | ZAP70    | IPI00329789 | 3.748616 |
| hsa:5777  | PTPN6        | IPI00218604 | hsa:7297   | TYK2     | IPI00022353 | 3.748616 |
| hsa:5777  | PTPN6        | IPI00218604 | hsa:3716   | JAK1     | IPI00443765 | 3.748616 |
| hsa:5781  | PTPN11       | IPI00658023 | hsa:3716   | JAK1     | IPI00443765 | 3.748616 |
| hsa:5777  | PTPN6        | IPI00218604 | hsa:3717   | JAK2     | IPI00031016 | 3.748616 |
| hsa:5781  | PTPN11       | IPI00658023 | hsa:3717   | JAK2     | IPI00031016 | 3.748616 |
| hsa:5777  | PTPN6        | IPI00218604 | hsa:6850   | SYK      | IPI00018597 | 3.748616 |
| hsa:5777  | PTPN6        | IPI00218604 | hsa:3718   | JAK3     | IPI00002773 | 3.748616 |
| hsa:387   | RHOA         | IPI00478231 | hsa:11113  | CIT      | IPI00022465 | 3.731886 |
| hsa:389   | RHOC         | IPI00027434 | hsa:11113  | CIT      | IPI00022465 | 3.731886 |
| hsa:7046  | TGFBR1       | IPI00005733 | hsa:55111  | PLEKHJ1  | IPI00644031 | 3.717411 |
| hsa:7046  | TGFBR1       | IPI00005733 | hsa:58473  | PLEKHB1  | IPI00009635 | 3.717411 |
| hsa:7046  | TGFBR1       | IPI00005733 | hsa:55843  | ARHGAP15 | IPI00182116 | 3.717411 |
| hsa:7046  | TGFBR1       | IPI00005733 | hsa:79674  | VEPH1    | IPI00478192 | 3.717411 |
| hsa:2261  | FGFR3        | IPI00027174 | hsa:116985 | CENTD2   | IPI00479190 | 3.717411 |
| hsa:5979  | RET          | IPI00013983 | hsa:220164 | DOK6     | IPI00400860 | 3.717411 |
| hsa:5979  | RET          | IPI00013983 | hsa:79930  | DOK3     | IPI00156649 | 3.717411 |
| hsa:5979  | RET          | IPI00013983 | hsa:55816  | DOK5     | IPI00020443 | 3.717411 |
| hsa:5979  | RET          | IPI00013983 | hsa:55715  | DOK4     | IPI00550728 | 3.717411 |
| hsa:5979  | RET          | IPI00013983 | hsa:9046   | DOK2     | IPI00022602 | 3.717411 |
| hsa:5979  | RET          | IPI00013983 | hsa:2549   | GAB1     | IPI00031068 | 3.717411 |
| hsa:5979  | RET          | IPI00013983 | hsa:1796   | DOK1     | IPI00015287 | 3.717411 |
| hsa:4233  | MET          | IPI00029273 | hsa:2549   | GAB1     | IPI00031068 | 3.717411 |
| hsa:5594  | MAPK1        | IPI00003479 | hsa:3667   | IRS1     | IPI00019471 | 3.717411 |
| hsa:5594  | MAPK1        | IPI00003479 | hsa:9846   | GAB2     | IPI00186990 | 3.717411 |
| hsa:5594  | MAPK1        | IPI00003479 | hsa:2549   | GAB1     | IPI00031068 | 3.717411 |
| hsa:5580  | PRKCD        | IPI00329236 | hsa:3667   | IRS1     | IPI00019471 | 3.717411 |
| hsa:5580  | PRKCD        | IPI00329236 | hsa:5338   | PLD2     | IPI00024727 | 3.717411 |

|           |         |             |            |          |             |          |
|-----------|---------|-------------|------------|----------|-------------|----------|
| hsa:5580  | PRKCD   | IPI00329236 | hsa:9267   | PSCD1    | IPI00478608 | 3.717411 |
| hsa:5599  | MAPK8   | IPI00024672 | hsa:5587   | PRKD1    | IPI00782950 | 3.717411 |
| hsa:5599  | MAPK8   | IPI00024672 | hsa:3667   | IRS1     | IPI00019471 | 3.717411 |
| hsa:5595  | MAPK3   | IPI00018195 | hsa:9846   | GAB2     | IPI00186990 | 3.717411 |
| hsa:5595  | MAPK3   | IPI00018195 | hsa:2549   | GAB1     | IPI00031068 | 3.717411 |
| hsa:5595  | MAPK3   | IPI00018195 | hsa:156    | ADRBK1   | IPI00012497 | 3.717411 |
| hsa:1956  | EGFR    | IPI00018274 | hsa:5337   | PLD1     | IPI00012865 | 3.717411 |
| hsa:1956  | EGFR    | IPI00018274 | hsa:9046   | DOK2     | IPI00022602 | 3.717411 |
| hsa:1956  | EGFR    | IPI00018274 | hsa:2549   | GAB1     | IPI00031068 | 3.717411 |
| hsa:1956  | EGFR    | IPI00018274 | hsa:5338   | PLD2     | IPI00024727 | 3.717411 |
| hsa:1020  | CDK5    | IPI00023530 | hsa:1759   | DNM1     | IPI00873844 | 3.717411 |
| hsa:5747  | PTK2    | IPI00012885 | hsa:3667   | IRS1     | IPI00019471 | 3.717411 |
| hsa:5747  | PTK2    | IPI00012885 | hsa:1785   | DNM2     | IPI00033022 | 3.717411 |
| hsa:90    | ACVR1   | IPI00029219 | hsa:79674  | VEPH1    | IPI00478192 | 3.717411 |
| hsa:90    | ACVR1   | IPI00029219 | hsa:55111  | PLEKHJ1  | IPI00644031 | 3.717411 |
| hsa:90    | ACVR1   | IPI00029219 | hsa:58473  | PLEKHB1  | IPI00009635 | 3.717411 |
| hsa:983   | CDC2    | IPI00073536 | hsa:1785   | DNM2     | IPI00033022 | 3.717411 |
| hsa:238   | ALK     | IPI00395632 | hsa:3667   | IRS1     | IPI00019471 | 3.717411 |
| hsa:1452  | CSNK1A1 | IPI00183400 | hsa:11033  | CENTA1   | IPI00009992 | 3.717411 |
| hsa:5590  | PRKCZ   | IPI00013749 | hsa:11033  | CENTA1   | IPI00009992 | 3.717411 |
| hsa:5590  | PRKCZ   | IPI00013749 | hsa:8471   | IRS4     | IPI00020729 | 3.717411 |
| hsa:658   | BMPR1B  | IPI00010862 | hsa:79674  | VEPH1    | IPI00478192 | 3.717411 |
| hsa:658   | BMPR1B  | IPI00010862 | hsa:58473  | PLEKHB1  | IPI00009635 | 3.717411 |
| hsa:5584  | PRKCI   | IPI00016639 | hsa:11033  | CENTA1   | IPI00009992 | 3.717411 |
| hsa:1457  | CSNK2A1 | IPI00744507 | hsa:51177  | PLEKH01  | IPI00016877 | 3.717411 |
| hsa:3815  | KIT     | IPI00022296 | hsa:1796   | DOK1     | IPI00015287 | 3.717411 |
| hsa:5159  | PDGFRB  | IPI00015902 | hsa:2549   | GAB1     | IPI00031068 | 3.717411 |
| hsa:9448  | MAP4K4  | IPI00006752 | hsa:1796   | DOK1     | IPI00015287 | 3.717411 |
| hsa:207   | AKT1    | IPI00012866 | hsa:26060  | APPL1    | IPI00015836 | 3.717411 |
| hsa:207   | AKT1    | IPI00012866 | hsa:9846   | GAB2     | IPI00186990 | 3.717411 |
| hsa:3643  | INSR    | IPI00220325 | hsa:55715  | DOK4     | IPI00550728 | 3.717411 |
| hsa:3643  | INSR    | IPI00220325 | hsa:2549   | GAB1     | IPI00031068 | 3.717411 |
| hsa:3643  | INSR    | IPI00220325 | hsa:1796   | DOK1     | IPI00015287 | 3.717411 |
| hsa:3643  | INSR    | IPI00220325 | hsa:8660   | IRS2     | IPI00464978 | 3.717411 |
| hsa:3643  | INSR    | IPI00220325 | hsa:55816  | DOK5     | IPI00020443 | 3.717411 |
| hsa:4914  | NTRK1   | IPI00025076 | hsa:8660   | IRS2     | IPI00464978 | 3.717411 |
| hsa:7010  | TEK     | IPI00412829 | hsa:9046   | DOK2     | IPI00022602 | 3.717411 |
| hsa:7010  | TEK     | IPI00412829 | hsa:55715  | DOK4     | IPI00550728 | 3.717411 |
| hsa:3480  | IGF1R   | IPI00027232 | hsa:55715  | DOK4     | IPI00550728 | 3.717411 |
| hsa:3480  | IGF1R   | IPI00027232 | hsa:55816  | DOK5     | IPI00020443 | 3.717411 |
| hsa:5601  | MAPK9   | IPI00024673 | hsa:5587   | PRKD1    | IPI00782950 | 3.717411 |
| hsa:2931  | GSK3A   | IPI00292228 | hsa:23683  | PRKD3    | IPI00015538 | 3.717411 |
| hsa:6732  | SRPK1   | IPI00290439 | hsa:55612  | C20orf42 | IPI00304754 | 3.717411 |
| hsa:4593  | MUSK    | IPI00655599 | hsa:285489 | DOK7     | IPI00783590 | 3.717411 |
| hsa:2064  | ERBB2   | IPI00300384 | hsa:8471   | IRS4     | IPI00020729 | 3.717411 |
| hsa:2064  | ERBB2   | IPI00300384 | hsa:3667   | IRS1     | IPI00019471 | 3.717411 |
| hsa:2064  | ERBB2   | IPI00300384 | hsa:220164 | DOK6     | IPI00400860 | 3.717411 |
| hsa:2064  | ERBB2   | IPI00300384 | hsa:55715  | DOK4     | IPI00550728 | 3.717411 |
| hsa:2064  | ERBB2   | IPI00300384 | hsa:1796   | DOK1     | IPI00015287 | 3.717411 |
| hsa:4214  | MAP3K1  | IPI00855985 | hsa:8471   | IRS4     | IPI00020729 | 3.717411 |
| hsa:4914  | NTRK1   | IPI00025076 | hsa:23612  | PHLDA3   | IPI00329599 | 3.717411 |
| hsa:5590  | PRKCZ   | IPI00013749 | hsa:60312  | AFAP1    | IPI00444138 | 3.717411 |
| hsa:5580  | PRKCD   | IPI00329236 | hsa:60312  | AFAP1    | IPI00444138 | 3.717411 |
| hsa:29941 | PKN3    | IPI00413780 | hsa:5337   | PLD1     | IPI00012865 | 3.717411 |
| hsa:4914  | NTRK1   | IPI00025076 | hsa:3667   | IRS1     | IPI00019471 | 3.717411 |
| hsa:6093  | ROCK1   | IPI00022542 | hsa:3667   | IRS1     | IPI00019471 | 3.717411 |
| hsa:1147  | CHUK    | IPI00005104 | hsa:3667   | IRS1     | IPI00019471 | 3.717411 |
| hsa:5588  | PRKCQ   | IPI00029196 | hsa:3667   | IRS1     | IPI00019471 | 3.717411 |
| hsa:5170  | PDPK1   | IPI00002538 | hsa:3667   | IRS1     | IPI00019471 | 3.717411 |
| hsa:23235 | SNF1LK2 | IPI00465291 | hsa:3667   | IRS1     | IPI00019471 | 3.717411 |

|           |           |             |            |          |             |          |
|-----------|-----------|-------------|------------|----------|-------------|----------|
| hsa:3551  | IKBKB     | IPI00024709 | hsa:3667   | IRS1     | IPI00019471 | 3.717411 |
| hsa:5601  | MAPK9     | IPI00024673 | hsa:3667   | IRS1     | IPI00019471 | 3.717411 |
| hsa:5590  | PRKCZ     | IPI00013749 | hsa:3667   | IRS1     | IPI00019471 | 3.717411 |
| hsa:207   | AKT1      | IPI00012866 | hsa:3667   | IRS1     | IPI00019471 | 3.717411 |
| hsa:3643  | INSR      | IPI00220325 | hsa:3667   | IRS1     | IPI00019471 | 3.717411 |
| hsa:3480  | IGF1R     | IPI00027232 | hsa:3667   | IRS1     | IPI00019471 | 3.717411 |
| hsa:1457  | CSNK2A1   | IPI00744507 | hsa:3667   | IRS1     | IPI00019471 | 3.717411 |
| hsa:3791  | KDR       | IPI00021396 | hsa:1785   | DNM2     | IPI00033022 | 3.717411 |
| hsa:4486  | MST1R     | IPI00030273 | hsa:2549   | GAB1     | IPI00031068 | 3.717411 |
| hsa:5596  | MAPK4     | IPI00010156 | hsa:2549   | GAB1     | IPI00031068 | 3.717411 |
| hsa:4215  | MAP3K3    | IPI00017801 | hsa:2549   | GAB1     | IPI00031068 | 3.717411 |
| hsa:3480  | IGF1R     | IPI00027232 | hsa:8471   | IRS4     | IPI00020729 | 3.717411 |
| hsa:5596  | MAPK4     | IPI00010156 | hsa:9846   | GAB2     | IPI00186990 | 3.717411 |
| hsa:3480  | IGF1R     | IPI00027232 | hsa:8660   | IRS2     | IPI00464978 | 3.717411 |
| hsa:1455  | CSNK1G2   | IPI00297767 | hsa:10087  | COL4A3BP | IPI00024701 | 3.717411 |
| hsa:208   | AKT2      | IPI00012870 | hsa:26060  | APPL1    | IPI00015836 | 3.717411 |
| hsa:1956  | EGFR      | IPI00018274 | hsa:26060  | APPL1    | IPI00015836 | 3.717411 |
| hsa:1956  | EGFR      | IPI00018274 | hsa:55715  | DOK4     | IPI00550728 | 3.717411 |
| hsa:1956  | EGFR      | IPI00018274 | hsa:55816  | DOK5     | IPI00020443 | 3.717411 |
| hsa:1956  | EGFR      | IPI00018274 | hsa:220164 | DOK6     | IPI00400860 | 3.717411 |
| hsa:1956  | EGFR      | IPI00018274 | hsa:3667   | IRS1     | IPI00019471 | 3.717411 |
| hsa:1956  | EGFR      | IPI00018274 | hsa:8471   | IRS4     | IPI00020729 | 3.717411 |
| hsa:1455  | CSNK1G2   | IPI00297767 | hsa:10087  | COL4A3BP | IPI00024701 | 3.717411 |
| hsa:2261  | FGFR3     | IPI00027174 | hsa:116985 | CENTD2   | IPI00479190 | 3.717411 |
| hsa:3055  | HCK       | IPI00646510 | hsa:5296   | PIK3R2   | IPI00011736 | 3.713187 |
| hsa:2534  | FYN       | IPI00219012 | hsa:5296   | PIK3R2   | IPI00011736 | 3.713187 |
| hsa:7535  | ZAP70     | IPI00329789 | hsa:50619  | DEF6     | IPI00004924 | 3.709862 |
| hsa:8036  | SHOC2     | IPI00298928 | hsa:4893   | NRAS     | IPI00000005 | 3.626115 |
| hsa:7097  | TLR2      | IPI00019006 | hsa:5879   | RAC1     | IPI00010271 | 3.626115 |
| hsa:54106 | TLR911344 | IPI00010140 | hsa:3265   | HRAS     | IPI00000006 | 3.626115 |
| hsa:7097  | TLR2      | IPI00019006 | hsa:3265   | HRAS     | IPI00000006 | 3.626115 |
| hsa:8036  | SHOC2     | IPI00298928 | hsa:3265   | HRAS     | IPI00000006 | 3.626115 |
| hsa:5875  | RABGGTA   | IPI00022664 | hsa:5861   | RAB1A    | IPI00005719 | 3.626115 |
| hsa:8036  | SHOC2     | IPI00298928 | hsa:3845   | KRAS     | IPI00423568 | 3.626115 |
| hsa:6197  | RPS6KA3   | IPI00020898 | hsa:50944  | SHANK1   | IPI00007695 | 3.613373 |
| hsa:6196  | RPS6KA2   | IPI00300321 | hsa:50944  | SHANK1   | IPI00007695 | 3.613373 |
| hsa:7046  | TGFBR1    | IPI00005733 | hsa:3987   | LIMS1    | IPI00872358 | 3.60858  |
| hsa:7048  | TGFBR2    | IPI00020431 | hsa:7041   | TGFB1I1  | IPI00761017 | 3.60858  |
| hsa:5594  | MAPK1     | IPI00003479 | hsa:2275   | FHL3     | IPI00014399 | 3.60858  |
| hsa:5594  | MAPK1     | IPI00003479 | hsa:5829   | PXN      | IPI00335634 | 3.60858  |
| hsa:6850  | SYK       | IPI00018597 | hsa:5829   | PXN      | IPI00335634 | 3.60858  |
| hsa:5599  | MAPK8     | IPI00024672 | hsa:5829   | PXN      | IPI00335634 | 3.60858  |
| hsa:5595  | MAPK3     | IPI00018195 | hsa:5829   | PXN      | IPI00335634 | 3.60858  |
| hsa:7273  | TTN       | IPI00759754 | hsa:2274   | FHL2     | IPI00743342 | 3.60858  |
| hsa:5747  | PTK2      | IPI00012885 | hsa:5829   | PXN      | IPI00335634 | 3.60858  |
| hsa:5747  | PTK2      | IPI00012885 | hsa:64780  | MICAL1   | IPI00157757 | 3.60858  |
| hsa:5747  | PTK2      | IPI00012885 | hsa:7205   | TRIP6    | IPI00301561 | 3.60858  |
| hsa:5747  | PTK2      | IPI00012885 | hsa:7041   | TGFB1I1  | IPI00761017 | 3.60858  |
| hsa:5058  | PAK1      | IPI00656138 | hsa:5829   | PXN      | IPI00335634 | 3.60858  |
| hsa:2932  | GSK3B     | IPI00028570 | hsa:5829   | PXN      | IPI00335634 | 3.60858  |
| hsa:5170  | PDPK1     | IPI00002538 | hsa:5829   | PXN      | IPI00335634 | 3.60858  |
| hsa:9448  | MAP4K4    | IPI00006752 | hsa:6885   | MAP3K7   | IPI00295738 | 3.60858  |
| hsa:5592  | PRKG1     | IPI00436355 | hsa:1397   | CRIP2    | IPI00006034 | 3.60858  |
| hsa:2185  | PTK2B     | IPI00029702 | hsa:7041   | TGFB1I1  | IPI00761017 | 3.60858  |
| hsa:2185  | PTK2B     | IPI00029702 | hsa:9404   | LPXN     | IPI00299066 | 3.60858  |
| hsa:11184 | MAP4K1    | IPI00020258 | hsa:6885   | MAP3K7   | IPI00295738 | 3.60858  |
| hsa:1025  | CDK9      | IPI00301923 | hsa:9204   | ZMYM6    | IPI00827877 | 3.60858  |
| hsa:1022  | CDK7      | IPI00000685 | hsa:2966   | GTF2H2   | IPI00426640 | 3.60858  |
| hsa:10114 | HIPK3     | IPI00099522 | hsa:8994   | LIMD1    | IPI00003369 | 3.60858  |
| hsa:10114 | HIPK3     | IPI00099522 | hsa:55679  | LIMS2    | IPI00815737 | 3.60858  |

|            |           |             |           |          |             |          |
|------------|-----------|-------------|-----------|----------|-------------|----------|
| hsa:3611   | ILK       | IPI00013219 | hsa:55679 | LIMS2    | IPI00815737 | 3.60858  |
| hsa:3611   | ILK       | IPI00013219 | hsa:3987  | LIMS1    | IPI00872358 | 3.60858  |
| hsa:5563   | PRKAA2    | IPI00307755 | hsa:7205  | TRIP6    | IPI00301561 | 3.60858  |
| hsa:9392   | TGFBRAP1  | IPI00550891 | hsa:94    | ACVRL1   | IPI00293271 | 3.60858  |
| hsa:11035  | RIPK3     | IPI00294938 | hsa:51474 | LIMA1    | IPI00008918 | 3.60858  |
| hsa:4215   | MAP3K3    | IPI00017801 | hsa:51474 | LIMA1    | IPI00008918 | 3.60858  |
| hsa:23043  | TNIK      | IPI00145805 | hsa:5594  | MAPK1    | IPI00003479 | 3.60858  |
| hsa:9641   | IKBKE     | IPI00029045 | hsa:2273  | FHL1     | IPI00647207 | 3.60858  |
| hsa:9392   | TGFBRAP1  | IPI00550891 | hsa:7046  | TGFBR1   | IPI00005733 | 3.60858  |
| hsa:9392   | TGFBRAP1  | IPI00550891 | hsa:7048  | TGFBR2   | IPI00020431 | 3.60858  |
| hsa:10114  | HIPK3     | IPI00099522 | hsa:7791  | ZYX      | IPI00871311 | 3.60858  |
| hsa:9113   | LATS1     | IPI00005858 | hsa:7791  | ZYX      | IPI00871311 | 3.60858  |
| hsa:26524  | LATS2     | IPI00016690 | hsa:84962 | JUB      | IPI00063605 | 3.60858  |
| hsa:57144  | PAK7      | IPI00001814 | hsa:2275  | FHL3     | IPI00014399 | 3.60858  |
| hsa:9392   | TGFBRAP1  | IPI00550891 | hsa:657   | BMPRI1A  | IPI00005731 | 3.60858  |
| hsa:9392   | TGFBRAP1  | IPI00550891 | hsa:93    | ACVR2B   | IPI00437565 | 3.60858  |
| hsa:10461  | MERTK     | IPI00029756 | hsa:8543  | LMO4     | IPI00297604 | 3.60858  |
| hsa:2931   | GSK3A     | IPI00292228 | hsa:5829  | PXN      | IPI00335634 | 3.60858  |
| hsa:2185   | PTK2B     | IPI00029702 | hsa:5829  | PXN      | IPI00335634 | 3.60858  |
| hsa:3611   | ILK       | IPI00013219 | hsa:5829  | PXN      | IPI00335634 | 3.60858  |
| hsa:2047   | EPHB1     | IPI00008315 | hsa:5829  | PXN      | IPI00335634 | 3.60858  |
| hsa:3984   | LIMK1     | IPI00291702 | hsa:5829  | PXN      | IPI00335634 | 3.60858  |
| hsa:5063   | PAK3      | IPI00410084 | hsa:5829  | PXN      | IPI00335634 | 3.60858  |
| hsa:10114  | HIPK3     | IPI00099522 | hsa:7041  | TGFB1I1  | IPI00761017 | 3.60858  |
| hsa:225689 | MAPK15    | IPI00747020 | hsa:7041  | TGFB1I1  | IPI00761017 | 3.60858  |
| hsa:9392   | TGFBRAP1  | IPI00550891 | hsa:91    | ACVR1B   | IPI00005732 | 3.60858  |
| hsa:57144  | PAK7      | IPI00001814 | hsa:2275  | FHL3     | IPI00014399 | 3.60858  |
| hsa:5581   | PRKCE     | IPI00024539 | hsa:7074  | TIAM1    | IPI00011400 | 3.603252 |
| hsa:5578   | PRKCA     | IPI00385449 | hsa:7074  | TIAM1    | IPI00011400 | 3.603252 |
| hsa:5582   | PRKCG     | IPI00007128 | hsa:7074  | TIAM1    | IPI00011400 | 3.603252 |
| hsa:868    | CBLB      | IPI00292856 | hsa:5979  | RET      | IPI00013983 | 3.566742 |
| hsa:868    | CBLB      | IPI00292856 | hsa:1956  | EGFR     | IPI00018274 | 3.566742 |
| hsa:5795   | PTPRJ     | IPI00847732 | hsa:1956  | EGFR     | IPI00018274 | 3.555177 |
| hsa:8506   | CNTNAP1   | IPI00219249 | hsa:23114 | NFASC    | IPI00513705 | 3.546723 |
| hsa:26047  | CNTNAP2   | IPI00029343 | hsa:6900  | CNTN2    | IPI00024966 | 3.546723 |
| hsa:4684   | NCAM1     | IPI00435020 | hsa:1463  | NCAN     | IPI00159927 | 3.536392 |
| hsa:3897   | L1CAM     | IPI00027087 | hsa:1463  | NCAN     | IPI00159927 | 3.536392 |
| hsa:5781   | PTPN11    | IPI00658023 | hsa:5583  | PRKCH    | IPI00031610 | 3.511445 |
| hsa:5781   | PTPN11    | IPI00658023 | hsa:5579  | PRKCB1   | IPI00010466 | 3.511445 |
| hsa:5781   | PTPN11    | IPI00658023 | hsa:5578  | PRKCA    | IPI00385449 | 3.511445 |
| hsa:5777   | PTPN6     | IPI00218604 | hsa:5578  | PRKCA    | IPI00385449 | 3.511445 |
| hsa:6300   | MAPK12    | IPI00296283 | hsa:5998  | RGS3     | IPI00181533 | 3.477853 |
| hsa:10114  | HIPK3     | IPI00099522 | hsa:5998  | RGS3     | IPI00181533 | 3.477853 |
| hsa:3055   | HCK       | IPI00646510 | hsa:5921  | RASA1    | IPI00026262 | 3.472814 |
| hsa:3932   | LCK       | IPI00394952 | hsa:5921  | RASA1    | IPI00026262 | 3.472814 |
| hsa:6714   | SRC       | IPI00641230 | hsa:5921  | RASA1    | IPI00026262 | 3.472814 |
| hsa:25     | ABL129892 | IPI00216969 | hsa:5921  | RASA1    | IPI00026262 | 3.472814 |
| hsa:4067   | LYN       | IPI00298625 | hsa:5921  | RASA1    | IPI00026262 | 3.472814 |
| hsa:1445   | CSK       | IPI00013212 | hsa:5921  | RASA1    | IPI00026262 | 3.472814 |
| hsa:7525   | YES1      | IPI00013981 | hsa:5921  | RASA1    | IPI00026262 | 3.472814 |
| hsa:11060  | WWP2      | IPI00013010 | hsa:9260  | PDLIM7   | IPI00023122 | 3.454882 |
| hsa:80125  | CCDC33    | IPI00376874 | hsa:1856  | DVL2     | IPI00023103 | 3.454882 |
| hsa:23072  | HECW1     | IPI00173347 | hsa:1855  | DVL1     | IPI00023100 | 3.454882 |
| hsa:23236  | PLCB1     | IPI00219563 | hsa:9368  | SLC9A3R1 | IPI00003527 | 3.454882 |
| hsa:5330   | PLCB2     | IPI00744517 | hsa:9368  | SLC9A3R1 | IPI00003527 | 3.454882 |
| hsa:6857   | SYT1      | IPI00009439 | hsa:22999 | RIMS1    | IPI00387015 | 3.454882 |
| hsa:10497  | UNC13B    | IPI00478689 | hsa:22999 | RIMS1    | IPI00387015 | 3.454882 |
| hsa:5331   | PLCB3     | IPI00010400 | hsa:9351  | SLC9A3R2 | IPI00385034 | 3.454882 |
| hsa:5331   | PLCB3     | IPI00010400 | hsa:56288 | PARD3    | IPI00154915 | 3.454882 |
| hsa:23236  | PLCB1     | IPI00219563 | hsa:56288 | PARD3    | IPI00154915 | 3.454882 |

|           |         |             |            |          |             |          |
|-----------|---------|-------------|------------|----------|-------------|----------|
| hsa:5331  | PLCB3   | IPI00010400 | hsa:50855  | PARD6A   | IPI00027217 | 3.454882 |
| hsa:23236 | PLCB1   | IPI00219563 | hsa:50855  | PARD6A   | IPI00027217 | 3.454882 |
| hsa:23236 | PLCB1   | IPI00219563 | hsa:6002   | RGS12    | IPI00024714 | 3.454882 |
| hsa:5331  | PLCB3   | IPI00010400 | hsa:6002   | RGS12    | IPI00024714 | 3.454882 |
| hsa:57154 | SMURF1  | IPI00217054 | hsa:85415  | RHPN2    | IPI00292548 | 3.454882 |
| hsa:827   | CAPN6   | IPI00002547 | hsa:9368   | SLC9A3R1 | IPI00003527 | 3.454882 |
| hsa:5331  | PLCB3   | IPI00010400 | hsa:9368   | SLC9A3R1 | IPI00003527 | 3.454882 |
| hsa:11060 | WWP2    | IPI00013010 | hsa:9260   | PDLIM7   | IPI00023122 | 3.454882 |
| hsa:2260  | FGFR1   | IPI00005142 | hsa:2065   | ERBB3    | IPI00298285 | 3.453922 |
| hsa:994   | CDC25B  | IPI00291990 | hsa:9833   | MELK     | IPI00006471 | 3.430379 |
| hsa:994   | CDC25B  | IPI00291990 | hsa:1111   | CHEK1    | IPI00023664 | 3.430379 |
| hsa:994   | CDC25B  | IPI00291990 | hsa:84446  | BRSK1    | IPI00148020 | 3.430379 |
| hsa:994   | CDC25B  | IPI00291990 | hsa:9024   | BRSK2    | IPI00744296 | 3.430379 |
| hsa:994   | CDC25B  | IPI00291990 | hsa:1457   | CSNK2A1  | IPI00744507 | 3.430379 |
| hsa:995   | CDC25C  | IPI00216683 | hsa:84446  | BRSK1    | IPI00148020 | 3.430379 |
| hsa:995   | CDC25C  | IPI00216683 | hsa:9024   | BRSK2    | IPI00744296 | 3.430379 |
| hsa:995   | CDC25C  | IPI00216683 | hsa:11200  | CHEK2    | IPI00014072 | 3.430379 |
| hsa:995   | CDC25C  | IPI00216683 | hsa:1111   | CHEK1    | IPI00023664 | 3.430379 |
| hsa:995   | CDC25C  | IPI00216683 | hsa:1263   | PLK3     | IPI00304186 | 3.430379 |
| hsa:995   | CDC25C  | IPI00216683 | hsa:4140   | MARK3    | IPI00183118 | 3.430379 |
| hsa:995   | CDC25C  | IPI00216683 | hsa:5347   | PLK1     | IPI00021248 | 3.430379 |
| hsa:993   | CDC25A  | IPI00220981 | hsa:5292   | PIM1     | IPI00005014 | 3.430379 |
| hsa:994   | CDC25B  | IPI00291990 | hsa:1432   | MAPK14   | IPI00002857 | 3.430379 |
| hsa:995   | CDC25C  | IPI00216683 | hsa:1432   | MAPK14   | IPI00002857 | 3.430379 |
| hsa:994   | CDC25B  | IPI00291990 | hsa:6790   | AURKA    | IPI00298940 | 3.430379 |
| hsa:995   | CDC25C  | IPI00216683 | hsa:3932   | LCK      | IPI00394952 | 3.430379 |
| hsa:993   | CDC25A  | IPI00220981 | hsa:1956   | EGFR     | IPI00018274 | 3.430379 |
| hsa:995   | CDC25C  | IPI00216683 | hsa:5585   | PKN1     | IPI00002803 | 3.430379 |
| hsa:995   | CDC25C  | IPI00216683 | hsa:983    | CDC2     | IPI00073536 | 3.430379 |
| hsa:994   | CDC25B  | IPI00291990 | hsa:983    | CDC2     | IPI00073536 | 3.430379 |
| hsa:993   | CDC25A  | IPI00220981 | hsa:983    | CDC2     | IPI00073536 | 3.430379 |
| hsa:993   | CDC25A  | IPI00220981 | hsa:6093   | ROCK1    | IPI00022542 | 3.430379 |
| hsa:993   | CDC25A  | IPI00220981 | hsa:5894   | RAF1     | IPI00021786 | 3.430379 |
| hsa:993   | CDC25A  | IPI00220981 | hsa:4217   | MAP3K5   | IPI00412433 | 3.430379 |
| hsa:993   | CDC25A  | IPI00220981 | hsa:11200  | CHEK2    | IPI00014072 | 3.430379 |
| hsa:993   | CDC25A  | IPI00220981 | hsa:1017   | CDK2     | IPI00031681 | 3.430379 |
| hsa:993   | CDC25A  | IPI00220981 | hsa:1111   | CHEK1    | IPI00023664 | 3.430379 |
| hsa:993   | CDC25A  | IPI00220981 | hsa:9261   | MAPKAPK2 | IPI00026054 | 3.430379 |
| hsa:994   | CDC25B  | IPI00291990 | hsa:1017   | CDK2     | IPI00031681 | 3.430379 |
| hsa:10188 | TNK2    | IPI00167089 | hsa:5923   | RASGRF1  | IPI00016784 | 3.404266 |
| hsa:5728  | PTEN    | IPI00012587 | hsa:5159   | PDGFRB   | IPI00015902 | 3.384839 |
| hsa:5770  | PTPN1   | IPI00297261 | hsa:5159   | PDGFRB   | IPI00015902 | 3.384839 |
| hsa:214   | ALCAM   | IPI00015102 | hsa:1956   | EGFR     | IPI00018274 | 3.37261  |
| hsa:634   | CEACAM1 | IPI00009938 | hsa:1956   | EGFR     | IPI00018274 | 3.37261  |
| hsa:3084  | NRG1    | IPI00296902 | hsa:2066   | ERBB4    | IPI00016371 | 3.37261  |
| hsa:3084  | NRG1    | IPI00296902 | hsa:2064   | ERBB2    | IPI00300384 | 3.37261  |
| hsa:5802  | PTPRS   | IPI00289831 | hsa:1956   | EGFR     | IPI00018274 | 3.360153 |
| hsa:6452  | SH3BP2  | IPI00218997 | hsa:7409   | VAV1     | IPI00011696 | 3.353399 |
| hsa:6452  | SH3BP2  | IPI00218997 | hsa:7410   | VAV2     | IPI00446303 | 3.353399 |
| hsa:5788  | PTPRC   | IPI00844079 | hsa:3643   | INSR     | IPI00220325 | 3.335685 |
| hsa:3932  | LCK     | IPI00394952 | hsa:919    | CD247    | IPI00218634 | 3.327779 |
| hsa:6850  | SYK     | IPI00018597 | hsa:150372 | NFAM1    | IPI00168743 | 3.327779 |
| hsa:6850  | SYK     | IPI00018597 | hsa:7305   | TYROBP   | IPI00015144 | 3.327779 |
| hsa:6850  | SYK     | IPI00018597 | hsa:2207   | FCER1G   | IPI00025804 | 3.327779 |
| hsa:3718  | JAK3    | IPI00002773 | hsa:919    | CD247    | IPI00218634 | 3.327779 |
| hsa:6464  | SHC1    | IPI00645103 | hsa:919    | CD247    | IPI00218634 | 3.327779 |
| hsa:4067  | LYN     | IPI00298625 | hsa:2207   | FCER1G   | IPI00025804 | 3.327779 |
| hsa:2534  | FYN     | IPI00219012 | hsa:919    | CD247    | IPI00218634 | 3.327779 |
| hsa:2885  | GRB2    | IPI00021327 | hsa:919    | CD247    | IPI00218634 | 3.327779 |
| hsa:1445  | CSK     | IPI00013212 | hsa:919    | CD247    | IPI00218634 | 3.327779 |



|            |          |             |            |         |             |          |
|------------|----------|-------------|------------|---------|-------------|----------|
| hsa:6776   | STAT5A   | IPI00030783 | hsa:919    | CD247   | IPI00218634 | 3.327779 |
| hsa:10019  | SH2B3    | IPI00010821 | hsa:919    | CD247   | IPI00218634 | 3.327779 |
| hsa:7535   | ZAP70    | IPI00329789 | hsa:150372 | NFAM1   | IPI00168743 | 3.327779 |
| hsa:7535   | ZAP70    | IPI00329789 | hsa:7305   | TYROBP  | IPI00015144 | 3.327779 |
| hsa:5336   | PLCG2    | IPI00329185 | hsa:2207   | FCER1G  | IPI00025804 | 3.327779 |
| hsa:695    | BTK      | IPI00029132 | hsa:2207   | FCER1G  | IPI00025804 | 3.327779 |
| hsa:84174  | SLA2     | IPI00030447 | hsa:919    | CD247   | IPI00218634 | 3.327779 |
| hsa:6777   | STAT5B   | IPI00103415 | hsa:919    | CD247   | IPI00218634 | 3.327779 |
| hsa:6503   | SLA      | IPI00009499 | hsa:919    | CD247   | IPI00218634 | 3.327779 |
| hsa:7535   | ZAP70    | IPI00329789 | hsa:919    | CD247   | IPI00218634 | 3.327779 |
| hsa:5595   | MAPK3    | IPI00018195 | hsa:7553   | ZNF7    | IPI00012527 | 3.320395 |
| hsa:1457   | CSNK2A1  | IPI00744507 | hsa:4150   | MAZ     | IPI00869267 | 3.320395 |
| hsa:2322   | FLT3     | IPI00748391 | hsa:84922  | FIZ1    | IPI00045801 | 3.320395 |
| hsa:10114  | HIPK3    | IPI00099522 | hsa:51427  | ZNF107  | IPI00008208 | 3.320395 |
| hsa:51776  | ZAK      | IPI00329638 | hsa:163081 | ZNF567  | IPI00640322 | 3.320395 |
| hsa:114783 | LMTK3    | IPI00140833 | hsa:7704   | ZBTB16  | IPI00305613 | 3.320395 |
| hsa:4215   | MAP3K3   | IPI00017801 | hsa:7704   | ZBTB16  | IPI00305613 | 3.320395 |
| hsa:983    | CDC2     | IPI00073536 | hsa:7704   | ZBTB16  | IPI00305613 | 3.320395 |
| hsa:4750   | NEK1     | IPI00044749 | hsa:59348  | ZNF350  | IPI00478374 | 3.320395 |
| hsa:51776  | ZAK      | IPI00329638 | hsa:163081 | ZNF567  | IPI00640322 | 3.320395 |
| hsa:114783 | LMTK3    | IPI00140833 | hsa:7704   | ZNF145  | IPI00305613 | 3.320395 |
| hsa:4215   | MAP3K3   | IPI00017801 | hsa:7704   | ZNF145  | IPI00305613 | 3.320395 |
| hsa:5335   | PLCG1    | IPI00016736 | hsa:613    | BCR     | IPI00004497 | 3.317555 |
| hsa:5879   | RAC1     | IPI00010271 | hsa:5584   | PRKCI   | IPI00016639 | 3.310522 |
| hsa:5867   | RAB4A    | IPI00480056 | hsa:5584   | PRKCI   | IPI00016639 | 3.310522 |
| hsa:5862   | RAB2A    | IPI00031169 | hsa:5584   | PRKCI   | IPI00016639 | 3.310522 |
| hsa:3265   | HRAS     | IPI00000006 | hsa:5584   | PRKCI   | IPI00016639 | 3.310522 |
| hsa:23433  | RHOQ     | IPI00012511 | hsa:5584   | PRKCI   | IPI00016639 | 3.310522 |
| hsa:998    | CDC42    | IPI00007189 | hsa:5584   | PRKCI   | IPI00016639 | 3.310522 |
| hsa:1019   | CDK4     | IPI00007811 | hsa:896    | CCND3   | IPI00025817 | 3.307866 |
| hsa:5596   | MAPK4    | IPI00010156 | hsa:896    | CCND3   | IPI00025817 | 3.307866 |
| hsa:984    | CDC2L1   | IPI00215999 | hsa:896    | CCND3   | IPI00025817 | 3.307866 |
| hsa:1021   | CDK6     | IPI00023529 | hsa:896    | CCND3   | IPI00025817 | 3.307866 |
| hsa:5218   | PFTK1    | IPI00165249 | hsa:896    | CCND3   | IPI00025817 | 3.307866 |
| hsa:1019   | CDK4     | IPI00007811 | hsa:896    | CCND3   | IPI00025817 | 3.307866 |
| hsa:3320   | HSP90AA1 | IPI00784295 | hsa:9891   | NUAK1   | IPI00028566 | 3.307865 |
| hsa:3320   | HSP90AA1 | IPI00784295 | hsa:1111   | CHEK1   | IPI00023664 | 3.307865 |
| hsa:3320   | HSP90AA1 | IPI00784295 | hsa:6714   | SRC     | IPI00641230 | 3.307865 |
| hsa:3320   | HSP90AA1 | IPI00784295 | hsa:9641   | IKBKE   | IPI00029045 | 3.307865 |
| hsa:3320   | HSP90AA1 | IPI00784295 | hsa:29110  | TBK1    | IPI00293613 | 3.307865 |
| hsa:3320   | HSP90AA1 | IPI00784295 | hsa:9020   | MAP3K14 | IPI00016099 | 3.307865 |
| hsa:3320   | HSP90AA1 | IPI00784295 | hsa:4215   | MAP3K3  | IPI00017801 | 3.307865 |
| hsa:3320   | HSP90AA1 | IPI00784295 | hsa:3654   | IRAK1   | IPI00293652 | 3.307865 |
| hsa:3320   | HSP90AA1 | IPI00784295 | hsa:27102  | EIF2AK1 | IPI00328149 | 3.307865 |
| hsa:3320   | HSP90AA1 | IPI00784295 | hsa:8737   | RIPK1   | IPI00013773 | 3.307865 |
| hsa:3320   | HSP90AA1 | IPI00784295 | hsa:3551   | IKBKB   | IPI00024709 | 3.307865 |
| hsa:3320   | HSP90AA1 | IPI00784295 | hsa:1147   | CHUK    | IPI00005104 | 3.307865 |
| hsa:3320   | HSP90AA1 | IPI00784295 | hsa:3791   | KDR     | IPI00021396 | 3.307865 |
| hsa:3320   | HSP90AA1 | IPI00784295 | hsa:5594   | MAPK1   | IPI00003479 | 3.307865 |
| hsa:3320   | HSP90AA1 | IPI00784295 | hsa:5610   | EIF2AK2 | IPI00019463 | 3.307865 |
| hsa:3320   | HSP90AA1 | IPI00784295 | hsa:5292   | PIM1    | IPI00005014 | 3.307865 |
| hsa:3320   | HSP90AA1 | IPI00784295 | hsa:2064   | ERBB2   | IPI00300384 | 3.307865 |
| hsa:3320   | HSP90AA1 | IPI00784295 | hsa:5894   | RAF1    | IPI00021786 | 3.307865 |
| hsa:3320   | HSP90AA1 | IPI00784295 | hsa:208    | AKT2    | IPI00012870 | 3.307865 |
| hsa:3320   | HSP90AA1 | IPI00784295 | hsa:207    | AKT1    | IPI00012866 | 3.307865 |
| hsa:3320   | HSP90AA1 | IPI00784295 | hsa:5170   | PDPK1   | IPI00002538 | 3.307865 |
| hsa:3320   | HSP90AA1 | IPI00784295 | hsa:2081   | ERN1    | IPI00015974 | 3.307865 |
| hsa:3320   | HSP90AA1 | IPI00784295 | hsa:9451   | EIF2AK3 | IPI00303053 | 3.307865 |
| hsa:3320   | HSP90AA1 | IPI00784295 | hsa:1457   | CSNK2A1 | IPI00744507 | 3.307865 |
| hsa:3320   | HSP90AA1 | IPI00784295 | hsa:1459   | CSNK2A2 | IPI00020602 | 3.307865 |

|            |          |             |            |              |             |          |
|------------|----------|-------------|------------|--------------|-------------|----------|
| hsa:7094   | TLN1     | IPI00298994 | hsa:2185   | PTK2B        | IPI00029702 | 3.307865 |
| hsa:5894   | RAF1     | IPI00021786 | hsa:8844   | KSR1         | IPI00217124 | 3.307865 |
| hsa:5894   | RAF1     | IPI00021786 | hsa:6788   | STK3         | IPI00411984 | 3.307865 |
| hsa:5894   | RAF1     | IPI00021786 | hsa:55872  | PBK          | IPI00306708 | 3.307865 |
| hsa:5894   | RAF1     | IPI00021786 | hsa:283455 | KSR2         | IPI00414043 | 3.307865 |
| hsa:5894   | RAF1     | IPI00021786 | hsa:51765  | RP6-213H19.1 | IPI00292827 | 3.307865 |
| hsa:5894   | RAF1     | IPI00021786 | hsa:5562   | PRKAA1       | IPI00872804 | 3.307865 |
| hsa:5894   | RAF1     | IPI00021786 | hsa:5598   | MAPK7        | IPI00376860 | 3.307865 |
| hsa:5894   | RAF1     | IPI00021786 | hsa:4217   | MAP3K5       | IPI00412433 | 3.307865 |
| hsa:369    | ARAF     | IPI00872240 | hsa:55872  | PBK          | IPI00306708 | 3.307865 |
| hsa:7153   | TOP2A    | IPI00414101 | hsa:6732   | SRPK1        | IPI00290439 | 3.307865 |
| hsa:3326   | HSP90AB1 | IPI00414676 | hsa:4215   | MAP3K3       | IPI00017801 | 3.307865 |
| hsa:3326   | HSP90AB1 | IPI00414676 | hsa:9641   | IKBKE        | IPI00029045 | 3.307865 |
| hsa:3326   | HSP90AB1 | IPI00414676 | hsa:29110  | TBK1         | IPI00293613 | 3.307865 |
| hsa:7094   | TLN1     | IPI00298994 | hsa:1956   | EGFR         | IPI00018274 | 3.307865 |
| hsa:3320   | HSP90AA1 | IPI00784295 | hsa:7535   | ZAP70        | IPI00329789 | 3.307865 |
| hsa:3320   | HSP90AA1 | IPI00784295 | hsa:3932   | LCK          | IPI00394952 | 3.307865 |
| hsa:3320   | HSP90AA1 | IPI00784295 | hsa:11035  | RIPK3        | IPI00294938 | 3.307865 |
| hsa:3320   | HSP90AA1 | IPI00784295 | hsa:8767   | RIPK2        | IPI00021917 | 3.307865 |
| hsa:3320   | HSP90AA1 | IPI00784295 | hsa:4214   | MAP3K1       | IPI00855985 | 3.307865 |
| hsa:3326   | HSP90AB1 | IPI00414676 | hsa:4214   | MAP3K1       | IPI00855985 | 3.307865 |
| hsa:3320   | HSP90AA1 | IPI00784295 | hsa:1326   | MAP3K8       | IPI00298726 | 3.307865 |
| hsa:3326   | HSP90AB1 | IPI00414676 | hsa:1326   | MAP3K8       | IPI00298726 | 3.307865 |
| hsa:7184   | HSP90B1  | IPI00027230 | hsa:9451   | EIF2AK3      | IPI00303053 | 3.307865 |
| hsa:3326   | HSP90AB1 | IPI00414676 | hsa:1111   | CHEK1        | IPI00023664 | 3.307865 |
| hsa:3320   | HSP90AA1 | IPI00784295 | hsa:6885   | MAP3K7       | IPI00295738 | 3.307865 |
| hsa:10131  | TRAP1    | IPI00030275 | hsa:7046   | TGFBR1       | IPI00005733 | 3.307865 |
| hsa:10131  | TRAP1    | IPI00030275 | hsa:7048   | TGFBR2       | IPI00020431 | 3.307865 |
| hsa:673    | BRAF     | IPI00303797 | hsa:5594   | MAPK1        | IPI00003479 | 3.307865 |
| hsa:5894   | RAF1     | IPI00021786 | hsa:5594   | MAPK1        | IPI00003479 | 3.307865 |
| hsa:7155   | TOP2B    | IPI00027280 | hsa:5595   | MAPK3        | IPI00018195 | 3.307865 |
| hsa:5894   | RAF1     | IPI00021786 | hsa:5595   | MAPK3        | IPI00018195 | 3.307865 |
| hsa:7094   | TLN1     | IPI00298994 | hsa:5747   | PTK2         | IPI00012885 | 3.307865 |
| hsa:7153   | TOP2A    | IPI00414101 | hsa:983    | CDC2         | IPI00073536 | 3.307865 |
| hsa:7153   | TOP2A    | IPI00414101 | hsa:5578   | PRKCA        | IPI00385449 | 3.307865 |
| hsa:7153   | TOP2A    | IPI00414101 | hsa:1457   | CSNK2A1      | IPI00744507 | 3.307865 |
| hsa:7184   | HSP90B1  | IPI00027230 | hsa:1457   | CSNK2A1      | IPI00744507 | 3.307865 |
| hsa:7184   | HSP90B1  | IPI00027230 | hsa:1459   | CSNK2A2      | IPI00020602 | 3.307865 |
| hsa:7184   | HSP90B1  | IPI00027230 | hsa:2064   | ERBB2        | IPI00300384 | 3.307865 |
| hsa:7153   | TOP2A    | IPI00414101 | hsa:5579   | PRKCB1       | IPI00010466 | 3.307865 |
| hsa:5164   | PDK2     | IPI00797834 | hsa:207    | AKT1         | IPI00012866 | 3.307865 |
| hsa:3326   | HSP90AB1 | IPI00414676 | hsa:207    | AKT1         | IPI00012866 | 3.307865 |
| hsa:7153   | TOP2A    | IPI00414101 | hsa:5582   | PRKCG        | IPI00007128 | 3.307865 |
| hsa:3326   | HSP90AB1 | IPI00414676 | hsa:1147   | CHUK         | IPI00005104 | 3.307865 |
| hsa:3326   | HSP90AB1 | IPI00414676 | hsa:3551   | IKBKB        | IPI00024709 | 3.307865 |
| hsa:3326   | HSP90AB1 | IPI00414676 | hsa:9020   | MAP3K14      | IPI00016099 | 3.307865 |
| hsa:5164   | PDK2     | IPI00797834 | hsa:6446   | SGK          | IPI00297590 | 3.307865 |
| hsa:7094   | TLN1     | IPI00298994 | hsa:2064   | ERBB2        | IPI00300384 | 3.307865 |
| hsa:3326   | HSP90AB1 | IPI00414676 | hsa:208    | AKT2         | IPI00012870 | 3.307865 |
| hsa:5163   | PDK1     | IPI00014831 | hsa:6198   | RPS6KB1      | IPI00216132 | 3.307865 |
| hsa:5163   | PDK1     | IPI00014831 | hsa:5586   | PKN2         | IPI00002804 | 3.307865 |
| hsa:5163   | PDK1     | IPI00014831 | hsa:23678  | SGK3         | IPI00655852 | 3.307865 |
| hsa:3326   | HSP90AB1 | IPI00414676 | hsa:8737   | RIPK1        | IPI00013773 | 3.307865 |
| hsa:3326   | HSP90AB1 | IPI00414676 | hsa:11035  | RIPK3        | IPI00294938 | 3.307865 |
| hsa:3326   | HSP90AB1 | IPI00414676 | hsa:5894   | RAF1         | IPI00021786 | 3.307865 |
| hsa:567    | B2M      | IPI00004656 | hsa:925    | CD8A         | IPI00438278 | 3.297563 |
| hsa:51517  | NCKIPSD  | IPI00009319 | hsa:1730   | DIAPH2       | IPI00844377 | 3.290363 |
| hsa:10458  | BAIAP2   | IPI00299088 | hsa:1729   | DIAPH1       | IPI00783474 | 3.290363 |
| hsa:653361 | NCF1     | IPI00788186 | hsa:4688   | NCF2         | IPI00021070 | 3.290363 |
| hsa:64398  | MPP5     | IPI00174976 | hsa:84612  | PARD6B       | IPI00019025 | 3.290363 |

|            |          |             |            |          |             |          |
|------------|----------|-------------|------------|----------|-------------|----------|
| hsa:124056 | NOXO1    | IPI00172576 | hsa:10811  | NOXA1    | IPI00654838 | 3.290363 |
| hsa:156    | ADRBK1   | IPI00012497 | hsa:23413  | FREQ     | IPI00219110 | 3.279363 |
| hsa:156    | ADRBK1   | IPI00012497 | hsa:5957   | RCVRN    | IPI00219720 | 3.279363 |
| hsa:156    | ADRBK1   | IPI00012497 | hsa:824    | CAPN2    | IPI00289758 | 3.279363 |
| hsa:8476   | CDC42BPA | IPI00640468 | hsa:10627  | MRCL3    | IPI00220573 | 3.279363 |
| hsa:8476   | CDC42BPA | IPI00640468 | hsa:4633   | MYL2     | IPI00216798 | 3.279363 |
| hsa:5584   | PRKCI    | IPI00016639 | hsa:1147   | CHUK     | IPI00005104 | 3.275625 |
| hsa:5798   | PTPRN    | IPI00004440 | hsa:11122  | PTPRT    | IPI00013096 | 3.26317  |
| hsa:5788   | PTPRC    | IPI00844079 | hsa:3454   | IFNAR1   | IPI00012877 | 3.26317  |
| hsa:5771   | PTPN2    | IPI00219695 | hsa:2690   | GHR      | IPI00023599 | 3.26317  |
| hsa:5795   | PTPRJ    | IPI00847732 | hsa:3561   | IL2RG    | IPI00012899 | 3.26317  |
| hsa:5787   | PTPRB    | IPI00295577 | hsa:2690   | GHR      | IPI00023599 | 3.26317  |
| hsa:5770   | PTPN1    | IPI00297261 | hsa:2690   | GHR      | IPI00023599 | 3.26317  |
| hsa:5794   | PTPRH    | IPI00760988 | hsa:2690   | GHR      | IPI00023599 | 3.26317  |
| hsa:5780   | PTPN9    | IPI00852804 | hsa:2690   | GHR      | IPI00023599 | 3.26317  |
| hsa:5774   | PTPN3    | IPI00289649 | hsa:2690   | GHR      | IPI00023599 | 3.26317  |
| hsa:4485   | MST1     | IPI00292218 | hsa:4486   | MST1R    | IPI00030273 | 3.247723 |
| hsa:3082   | HGF      | IPI00025767 | hsa:4233   | MET      | IPI00029273 | 3.247723 |
| hsa:5581   | PRKCE    | IPI00024539 | hsa:4620   | MYH2     | IPI00007856 | 3.246609 |
| hsa:207    | AKT1     | IPI00012866 | hsa:55704  | CCDC88A  | IPI00171134 | 3.246609 |
| hsa:6446   | SGK      | IPI00297590 | hsa:4619   | MYH1     | IPI00025879 | 3.246609 |
| hsa:1017   | CDK2     | IPI00031681 | hsa:4626   | MYH8     | IPI00302329 | 3.246609 |
| hsa:6640   | SNTA1    | IPI00164528 | hsa:27165  | GLS2     | IPI00296219 | 3.230539 |
| hsa:6640   | SNTA1    | IPI00164528 | hsa:8525   | DGKZ     | IPI00013835 | 3.230539 |
| hsa:6640   | SNTA1    | IPI00164528 | hsa:2744   | GLS      | IPI00289159 | 3.230539 |
| hsa:1759   | DNM1     | IPI00873844 | hsa:79754  | ASB13    | IPI00103564 | 3.230539 |
| hsa:10603  | SH2B2    | IPI00155706 | hsa:140459 | ASB6     | IPI00016560 | 3.230539 |
| hsa:6641   | SNTB1    | IPI00026059 | hsa:8525   | DGKZ     | IPI00013835 | 3.230539 |
| hsa:6645   | SNTB2    | IPI00009505 | hsa:8525   | DGKZ     | IPI00013835 | 3.230539 |
| hsa:2888   | GRB14    | IPI00030917 | hsa:80351  | TNKS2    | IPI00019270 | 3.230539 |
| hsa:2046   | EPHA8    | IPI00021274 | hsa:2534   | FYN      | IPI00219012 | 3.230539 |
| hsa:84033  | OBSCN    | IPI00288940 | hsa:286    | ANK1     | IPI00216697 | 3.230539 |
| hsa:7074   | TIAM1    | IPI00011400 | hsa:286    | ANK1     | IPI00216697 | 3.230539 |
| hsa:6711   | SPTBN1   | IPI00005614 | hsa:287    | ANK2     | IPI00007834 | 3.230539 |
| hsa:84033  | OBSCN    | IPI00288940 | hsa:287    | ANK2     | IPI00007834 | 3.230539 |
| hsa:8527   | DGKD     | IPI00303136 | hsa:10456  | HAX1     | IPI00010440 | 3.230539 |
| hsa:54212  | SNTG1    | IPI00071897 | hsa:8525   | DGKZ     | IPI00013835 | 3.230539 |
| hsa:23164  | M-RIP    | IPI00305344 | hsa:4659   | PPP1R12A | IPI00183002 | 3.230539 |
| hsa:9462   | RASAL2   | IPI00006854 | hsa:4793   | NFKBIB   | IPI00161119 | 3.230539 |
| hsa:23164  | M-RIP    | IPI00305344 | hsa:54776  | PPP1R12C | IPI00443045 | 3.230539 |
| hsa:23612  | PHLDA3   | IPI00329599 | hsa:8625   | RFXANK   | IPI00022520 | 3.230539 |
| hsa:9046   | DOK2     | IPI00022602 | hsa:5716   | PSMD10   | IPI00003565 | 3.230539 |
| hsa:9181   | ARHGEF2  | IPI00472160 | hsa:4794   | NFKBIE   | IPI00442458 | 3.230539 |
| hsa:1759   | DNM1     | IPI00873844 | hsa:79754  | ASB13    | IPI00103564 | 3.230539 |
| hsa:3055   | HCK      | IPI00646510 | hsa:2889   | RAPGEF1  | IPI00394743 | 3.230079 |
| hsa:90     | ACVR1    | IPI00029219 | hsa:55785  | FGD6     | IPI00419100 | 3.210306 |
| hsa:983    | CDC2     | IPI00073536 | hsa:1894   | ECT2     | IPI00787864 | 3.210306 |
| hsa:5347   | PLK1     | IPI00021248 | hsa:1894   | ECT2     | IPI00787864 | 3.210306 |
| hsa:2043   | EPHA4    | IPI00008318 | hsa:22899  | ARHGEF15 | IPI00455852 | 3.210306 |
| hsa:941    | CD80     | IPI00015914 | hsa:1493   | CTLA4    | IPI00028559 | 3.206301 |
| hsa:2621   | GAS6     | IPI00412410 | hsa:7301   | TYRO3    | IPI00030887 | 3.157355 |
| hsa:2621   | GAS6     | IPI00412410 | hsa:10461  | MERTK    | IPI00029756 | 3.157355 |
| hsa:5627   | PROS1    | IPI00294004 | hsa:7301   | TYRO3    | IPI00030887 | 3.157355 |
| hsa:2621   | GAS6     | IPI00412410 | hsa:558    | AXL      | IPI00397361 | 3.157355 |
| hsa:695    | BTK      | IPI00029132 | hsa:5587   | PRKD1    | IPI00782950 | 3.109707 |
| hsa:3339   | HSPG2    | IPI00024284 | hsa:3673   | ITGA2    | IPI00013744 | 3.093924 |
| hsa:7087   | ICAM5    | IPI00290456 | hsa:3683   | ITGAL    | IPI00025380 | 3.093924 |
| hsa:5175   | PECAM1   | IPI00295618 | hsa:2547   | XRCC6    | IPI00644712 | 3.093924 |
| hsa:50848  | F11R     | IPI00645501 | hsa:3683   | ITGAL    | IPI00025380 | 3.093924 |
| hsa:7412   | VCAM1    | IPI00018136 | hsa:3681   | ITGAD    | IPI00218987 | 3.093924 |

|           |              |             |            |          |             |          |
|-----------|--------------|-------------|------------|----------|-------------|----------|
| hsa:2205  | FCER1A       | IPI00549768 | hsa:3698   | ITIH2    | IPI00305461 | 3.093924 |
| hsa:7070  | THY1         | IPI00022892 | hsa:3684   | ITGAM    | IPI00217987 | 3.093924 |
| hsa:83700 | JAM3         | IPI00382811 | hsa:3684   | ITGAM    | IPI00217987 | 3.093924 |
| hsa:83700 | JAM3         | IPI00382811 | hsa:3687   | ITGAX    | IPI00302270 | 3.093924 |
| hsa:6464  | SHC1         | IPI00645103 | hsa:5921   | RASA1    | IPI00026262 | 3.090081 |
| hsa:5580  | PRKCD        | IPI00329236 | hsa:113    | ADCY7    | IPI00020920 | 3.087341 |
| hsa:5578  | PRKCA        | IPI00385449 | hsa:111    | ADCY5    | IPI00339214 | 3.087341 |
| hsa:5566  | PRKACA730418 | IPI00396630 | hsa:111    | ADCY5    | IPI00339214 | 3.087341 |
| hsa:5894  | RAF1         | IPI00021786 | hsa:112    | ADCY6    | IPI00011938 | 3.087341 |
| hsa:818   | CAMK2G       | IPI00334344 | hsa:109    | ADCY3    | IPI00028513 | 3.087341 |
| hsa:5590  | PRKCZ        | IPI00013749 | hsa:111    | ADCY5    | IPI00339214 | 3.087341 |
| hsa:4294  | MAP3K10      | IPI00295401 | hsa:10256  | CNKSR1   | IPI00299824 | 3.060651 |
| hsa:3643  | INSR         | IPI00220325 | hsa:2888   | GRB14    | IPI00030917 | 3.041705 |
| hsa:3643  | INSR         | IPI00220325 | hsa:2887   | GRB10    | IPI00012752 | 3.041705 |
| hsa:3643  | INSR         | IPI00220325 | hsa:2886   | GRB7     | IPI00448767 | 3.041705 |
| hsa:3643  | INSR         | IPI00220325 | hsa:10603  | SH2B2    | IPI00155706 | 3.041705 |
| hsa:3643  | INSR         | IPI00220325 | hsa:25970  | SH2B1    | IPI00016441 | 3.041705 |
| hsa:7010  | TEK          | IPI00412829 | hsa:2888   | GRB14    | IPI00030917 | 3.041705 |
| hsa:7010  | TEK          | IPI00412829 | hsa:2886   | GRB7     | IPI00448767 | 3.041705 |
| hsa:2047  | EPHB1        | IPI00008315 | hsa:2887   | GRB10    | IPI00012752 | 3.041705 |
| hsa:3480  | IGF1R        | IPI00027232 | hsa:2887   | GRB10    | IPI00012752 | 3.041705 |
| hsa:2048  | EPHB2        | IPI00021275 | hsa:5921   | RASA1    | IPI00026262 | 3.040261 |
| hsa:3643  | INSR         | IPI00220325 | hsa:5335   | PLCG1    | IPI00016736 | 3.040261 |
| hsa:1969  | EPHA2        | IPI00021267 | hsa:5921   | RASA1    | IPI00026262 | 3.040261 |
| hsa:2049  | EPHB3        | IPI00289329 | hsa:5921   | RASA1    | IPI00026262 | 3.040261 |
| hsa:3643  | INSR         | IPI00220325 | hsa:5921   | RASA1    | IPI00026262 | 3.040261 |
| hsa:3480  | IGF1R        | IPI00027232 | hsa:5921   | RASA1    | IPI00026262 | 3.040261 |
| hsa:7046  | TGFBR1       | IPI00005733 | hsa:130497 | OSR1     | IPI00152145 | 3.03221  |
| hsa:7048  | TGFBR2       | IPI00020431 | hsa:130497 | OSR1     | IPI00152145 | 3.03221  |
| hsa:5594  | MAPK1        | IPI00003479 | hsa:604    | BCL6     | IPI00012820 | 3.03221  |
| hsa:5594  | MAPK1        | IPI00003479 | hsa:57658  | CALCOCO1 | IPI00011232 | 3.03221  |
| hsa:5594  | MAPK1        | IPI00003479 | hsa:8462   | KLF11    | IPI00024692 | 3.03221  |
| hsa:5580  | PRKCD        | IPI00329236 | hsa:688    | KLF5     | IPI00015934 | 3.03221  |
| hsa:6714  | SRC          | IPI00641230 | hsa:8517   | IKBKG    | IPI00002411 | 3.03221  |
| hsa:90    | ACVR1        | IPI00029219 | hsa:10713  | USP39    | IPI00419844 | 3.03221  |
| hsa:983   | CDC2         | IPI00073536 | hsa:10524  | HTATIP   | IPI00290020 | 3.03221  |
| hsa:5566  | PRKACA730418 | IPI00396630 | hsa:26993  | AKAP8L   | IPI00297455 | 3.03221  |
| hsa:5566  | PRKACA730418 | IPI00396630 | hsa:10661  | KLF1     | IPI00012816 | 3.03221  |
| hsa:5566  | PRKACA730418 | IPI00396630 | hsa:7490   | WT1      | IPI00215679 | 3.03221  |
| hsa:2932  | GSK3B        | IPI00028570 | hsa:8517   | IKBKG    | IPI00002411 | 3.03221  |
| hsa:1457  | CSNK2A1      | IPI00744507 | hsa:11244  | ZHX1     | IPI00293086 | 3.03221  |
| hsa:1457  | CSNK2A1      | IPI00744507 | hsa:10661  | KLF1     | IPI00012816 | 3.03221  |
| hsa:1459  | CSNK2A2      | IPI00020602 | hsa:10661  | KLF1     | IPI00012816 | 3.03221  |
| hsa:8767  | RIPK2        | IPI00021917 | hsa:8517   | IKBKG    | IPI00002411 | 3.03221  |
| hsa:7010  | TEK          | IPI00412829 | hsa:79155  | TNIP2    | IPI00168953 | 3.03221  |
| hsa:9833  | MELK         | IPI00006471 | hsa:90441  | ZNF622   | IPI00056499 | 3.03221  |
| hsa:1147  | CHUK         | IPI00005104 | hsa:8517   | IKBKG    | IPI00002411 | 3.03221  |
| hsa:3551  | IKBKB        | IPI00024709 | hsa:8517   | IKBKG    | IPI00002411 | 3.03221  |
| hsa:5601  | MAPK9        | IPI00024673 | hsa:7597   | ZBTB25   | IPI00217777 | 3.03221  |
| hsa:8737  | RIPK1        | IPI00013773 | hsa:8517   | IKBKG    | IPI00002411 | 3.03221  |
| hsa:9020  | MAP3K14      | IPI00016099 | hsa:8517   | IKBKG    | IPI00002411 | 3.03221  |
| hsa:1859  | DYRK1A       | IPI00014344 | hsa:2735   | GLI1     | IPI00027451 | 3.03221  |
| hsa:5588  | PRKCQ        | IPI00029196 | hsa:8517   | IKBKG    | IPI00002411 | 3.03221  |
| hsa:1326  | MAP3K8       | IPI00298726 | hsa:79155  | TNIP2    | IPI00168953 | 3.03221  |
| hsa:8997  | KALRN        | IPI00877065 | hsa:8328   | GFI1B    | IPI00003110 | 3.03221  |
| hsa:51776 | ZAK          | IPI00329638 | hsa:7581   | ZNF33A   | IPI00299890 | 3.03221  |
| hsa:6885  | MAP3K7       | IPI00295738 | hsa:8517   | IKBKG    | IPI00002411 | 3.03221  |
| hsa:4215  | MAP3K3       | IPI00017801 | hsa:26993  | AKAP8L   | IPI00297455 | 3.03221  |
| hsa:817   | CAMK2D       | IPI00430291 | hsa:8517   | IKBKG    | IPI00002411 | 3.03221  |
| hsa:5595  | MAPK3        | IPI00018195 | hsa:6667   | SP1      | IPI00465152 | 3.03221  |

|           |           |             |           |         |             |          |
|-----------|-----------|-------------|-----------|---------|-------------|----------|
| hsa:5594  | MAPK1     | IPI00003479 | hsa:6667  | SP1     | IPI00465152 | 3.03221  |
| hsa:1457  | CSNK2A1   | IPI00744507 | hsa:6667  | SP1     | IPI00465152 | 3.03221  |
| hsa:57761 | TRIB3     | IPI00290307 | hsa:10524 | HTATIP  | IPI00290020 | 3.03221  |
| hsa:984   | CDC2L1    | IPI00215999 | hsa:11143 | MYST2   | IPI00180764 | 3.03221  |
| hsa:27148 | STK36     | IPI00235407 | hsa:2736  | GLI2    | IPI00784005 | 3.03221  |
| hsa:29110 | TBK1      | IPI00293613 | hsa:8517  | IKBKG   | IPI00002411 | 3.03221  |
| hsa:27148 | STK36     | IPI00235407 | hsa:2737  | GLI3    | IPI00018889 | 3.03221  |
| hsa:27148 | STK36     | IPI00235407 | hsa:2735  | GLI1    | IPI00027451 | 3.03221  |
| hsa:6794  | STK11     | IPI00219072 | hsa:79155 | TNIP2   | IPI00168953 | 3.03221  |
| hsa:8899  | PRPF4B    | IPI00013721 | hsa:51621 | KLF13   | IPI00219691 | 3.03221  |
| hsa:65125 | WNK1      | IPI00004472 | hsa:84662 | GLIS2   | IPI00000274 | 3.03221  |
| hsa:4215  | MAP3K3    | IPI00017801 | hsa:8517  | IKBKG   | IPI00002411 | 3.03221  |
| hsa:7525  | YES1      | IPI00013981 | hsa:57473 | ZNF512B | IPI00074893 | 3.03221  |
| hsa:2932  | GSK3B     | IPI00028570 | hsa:6615  | SNAI1   | IPI00000757 | 3.03221  |
| hsa:5601  | MAPK9     | IPI00024673 | hsa:7597  | ZNF46   | IPI00217777 | 3.03221  |
| hsa:57761 | C2orf97   | IPI00290307 | hsa:10524 | HTATIP  | IPI00290020 | 3.03221  |
| hsa:1457  | CSNK2A1   | IPI00744507 | hsa:11244 | ZHX1    | IPI00293086 | 3.03221  |
| hsa:634   | CEACAM1   | IPI00009938 | hsa:1084  | CEACAM3 | IPI00027411 | 3.013855 |
| hsa:5771  | PTPN2     | IPI00219695 | hsa:5159  | PDGFRB  | IPI00015902 | 2.986411 |
| hsa:5782  | PTPN12    | IPI00289082 | hsa:2322  | FLT3    | IPI00748391 | 2.986411 |
| hsa:8573  | CASK      | IPI00514301 | hsa:22895 | RPH3A   | IPI00032227 | 2.985193 |
| hsa:6714  | SRC       | IPI00641230 | hsa:8525  | DGKZ    | IPI00013835 | 2.97367  |
| hsa:8573  | CASK      | IPI00514301 | hsa:8874  | ARHGEF7 | IPI00449906 | 2.962755 |
| hsa:5335  | PLCG1     | IPI00016736 | hsa:7222  | TRPC3   | IPI00748783 | 2.961327 |
| hsa:55743 | CHFR      | IPI00023513 | hsa:6790  | AURKA   | IPI00298940 | 2.956305 |
| hsa:1019  | CDK4      | IPI00007811 | hsa:894   | CCND2   | IPI00025810 | 2.940325 |
| hsa:1020  | CDK5      | IPI00023530 | hsa:894   | CCND2   | IPI00025810 | 2.940325 |
| hsa:1021  | CDK6      | IPI00023529 | hsa:894   | CCND2   | IPI00025810 | 2.940325 |
| hsa:1017  | CDK2      | IPI00031681 | hsa:894   | CCND2   | IPI00025810 | 2.940325 |
| hsa:3803  | KIR2DL2   | IPI00019883 | hsa:22918 | CD93    | IPI00299485 | 2.933963 |
| hsa:3077  | HFE       | IPI00029419 | hsa:567   | B2M     | IPI00004656 | 2.932526 |
| hsa:913   | CD1E      | IPI00783516 | hsa:567   | B2M     | IPI00004656 | 2.932526 |
| hsa:912   | CD1D      | IPI00013435 | hsa:567   | B2M     | IPI00004656 | 2.932526 |
| hsa:909   | CD1A      | IPI00025382 | hsa:567   | B2M     | IPI00004656 | 2.932526 |
| hsa:910   | CD1B      | IPI00019849 | hsa:567   | B2M     | IPI00004656 | 2.932526 |
| hsa:3134  | HLA-F     | IPI00646822 | hsa:567   | B2M     | IPI00004656 | 2.932526 |
| hsa:3133  | HLA-E     | IPI00830076 | hsa:567   | B2M     | IPI00004656 | 2.932526 |
| hsa:3135  | HLA-G     | IPI00015988 | hsa:567   | B2M     | IPI00004656 | 2.932526 |
| hsa:3107  | HLA-C3106 | IPI00004657 | hsa:567   | B2M     | IPI00004656 | 2.932526 |
| hsa:3106  | HLA-B     | unknown     | hsa:567   | B2M     | IPI00004656 | 2.932526 |
| hsa:3105  | HLA-A     | IPI00472882 | hsa:567   | B2M     | IPI00004656 | 2.932526 |
| hsa:4276  | MICA      | unknown     | hsa:567   | B2M     | IPI00004656 | 2.932526 |
| hsa:942   | CD86      | IPI00290621 | hsa:940   | CD28    | IPI00022339 | 2.931918 |
| hsa:2885  | GRB2      | IPI00021327 | hsa:25759 | SHC2    | IPI00786975 | 2.918409 |
| hsa:10451 | VAV3      | IPI00299763 | hsa:6464  | SHC1    | IPI00645103 | 2.918409 |
| hsa:10750 | GRAP      | IPI00013864 | hsa:6464  | SHC1    | IPI00645103 | 2.918409 |
| hsa:1398  | CRK       | IPI00004838 | hsa:6464  | SHC1    | IPI00645103 | 2.918409 |
| hsa:9402  | GRAP2     | IPI00026928 | hsa:6464  | SHC1    | IPI00645103 | 2.918409 |
| hsa:1399  | CRKL      | IPI00004839 | hsa:6464  | SHC1    | IPI00645103 | 2.918409 |
| hsa:2885  | GRB2      | IPI00021327 | hsa:6464  | SHC1    | IPI00645103 | 2.918409 |
| hsa:2885  | GRB2      | IPI00021327 | hsa:53358 | SHC3    | IPI00409679 | 2.918409 |
| hsa:2549  | GAB1      | IPI00031068 | hsa:6654  | SOS1    | IPI00020131 | 2.844572 |
| hsa:5921  | RASA1     | IPI00026262 | hsa:9223  | MAGI1   | IPI00470759 | 2.837938 |
| hsa:613   | BCR       | IPI00004497 | hsa:4301  | MLLT4   | IPI00398718 | 2.837938 |
| hsa:613   | BCR       | IPI00004497 | hsa:9546  | APBA3   | IPI00014073 | 2.837938 |
| hsa:8831  | SYNGAP1   | IPI00177884 | hsa:8777  | MPDZ    | IPI00552988 | 2.837938 |
| hsa:5979  | RET       | IPI00013983 | hsa:5335  | PLCG1   | IPI00016736 | 2.829073 |
| hsa:4233  | MET       | IPI00029273 | hsa:5335  | PLCG1   | IPI00016736 | 2.829073 |
| hsa:1956  | EGFR      | IPI00018274 | hsa:5335  | PLCG1   | IPI00016736 | 2.829073 |
| hsa:1956  | EGFR      | IPI00018274 | hsa:5921  | RASA1   | IPI00026262 | 2.829073 |

|           |          |             |           |        |             |          |
|-----------|----------|-------------|-----------|--------|-------------|----------|
| hsa:238   | ALK      | IPI00395632 | hsa:5335  | PLCG1  | IPI00016736 | 2.829073 |
| hsa:2064  | ERBB2    | IPI00300384 | hsa:5336  | PLCG2  | IPI00329185 | 2.829073 |
| hsa:2064  | ERBB2    | IPI00300384 | hsa:5921  | RASA1  | IPI00026262 | 2.829073 |
| hsa:2066  | ERBB4    | IPI00016371 | hsa:5921  | RASA1  | IPI00026262 | 2.829073 |
| hsa:2064  | ERBB2    | IPI00300384 | hsa:5335  | PLCG1  | IPI00016736 | 2.829073 |
| hsa:4914  | NTRK1    | IPI00025076 | hsa:5335  | PLCG1  | IPI00016736 | 2.829073 |
| hsa:780   | DDR1     | IPI00001477 | hsa:5335  | PLCG1  | IPI00016736 | 2.829073 |
| hsa:4486  | MST1R    | IPI00030273 | hsa:5335  | PLCG1  | IPI00016736 | 2.829073 |
| hsa:4914  | NTRK1    | IPI00025076 | hsa:5921  | RASA1  | IPI00026262 | 2.829073 |
| hsa:9212  | AURKB    | IPI00176642 | hsa:5921  | RASA1  | IPI00026262 | 2.829073 |
| hsa:9448  | MAP4K4   | IPI00006752 | hsa:5921  | RASA1  | IPI00026262 | 2.829073 |
| hsa:1956  | EGFR     | IPI00018274 | hsa:5336  | PLCG2  | IPI00329185 | 2.829073 |
| hsa:6790  | AURKA    | IPI00298940 | hsa:5921  | RASA1  | IPI00026262 | 2.829073 |
| hsa:5578  | PRKCA    | IPI00385449 | hsa:1742  | DLG4   | IPI00619928 | 2.828647 |
| hsa:2048  | EPHB2    | IPI00021275 | hsa:10044 | SH2D3C | IPI00171093 | 2.816469 |
| hsa:3643  | INSR     | IPI00220325 | hsa:8835  | SOCS2  | IPI00033944 | 2.816469 |
| hsa:3643  | INSR     | IPI00220325 | hsa:6777  | STAT5B | IPI00103415 | 2.816469 |
| hsa:3643  | INSR     | IPI00220325 | hsa:9306  | SOCS6  | IPI00297351 | 2.816469 |
| hsa:3643  | INSR     | IPI00220325 | hsa:8503  | PIK3R3 | IPI00513745 | 2.816469 |
| hsa:3643  | INSR     | IPI00220325 | hsa:8651  | SOCS1  | IPI00021491 | 2.816469 |
| hsa:7010  | TEK      | IPI00412829 | hsa:8651  | SOCS1  | IPI00021491 | 2.816469 |
| hsa:7010  | TEK      | IPI00412829 | hsa:6777  | STAT5B | IPI00103415 | 2.816469 |
| hsa:3480  | IGF1R    | IPI00027232 | hsa:8503  | PIK3R3 | IPI00513745 | 2.816469 |
| hsa:3480  | IGF1R    | IPI00027232 | hsa:8835  | SOCS2  | IPI00033944 | 2.816469 |
| hsa:3480  | IGF1R    | IPI00027232 | hsa:6774  | STAT3  | IPI00784414 | 2.816469 |
| hsa:7010  | TEK      | IPI00412829 | hsa:6464  | SHC1   | IPI00645103 | 2.816469 |
| hsa:1969  | EPHA2    | IPI00021267 | hsa:6464  | SHC1   | IPI00645103 | 2.816469 |
| hsa:3643  | INSR     | IPI00220325 | hsa:6464  | SHC1   | IPI00645103 | 2.816469 |
| hsa:3480  | IGF1R    | IPI00027232 | hsa:6464  | SHC1   | IPI00645103 | 2.816469 |
| hsa:7010  | TEK      | IPI00412829 | hsa:5295  | PIK3R1 | IPI00021448 | 2.816469 |
| hsa:3643  | INSR     | IPI00220325 | hsa:5295  | PIK3R1 | IPI00021448 | 2.816469 |
| hsa:3480  | IGF1R    | IPI00027232 | hsa:5295  | PIK3R1 | IPI00021448 | 2.816469 |
| hsa:3643  | INSR     | IPI00220325 | hsa:6776  | STAT5A | IPI00030783 | 2.816469 |
| hsa:7010  | TEK      | IPI00412829 | hsa:6776  | STAT5A | IPI00030783 | 2.816469 |
| hsa:3643  | INSR     | IPI00220325 | hsa:9021  | SOCS3  | IPI00297349 | 2.816469 |
| hsa:3480  | IGF1R    | IPI00027232 | hsa:9021  | SOCS3  | IPI00297349 | 2.816469 |
| hsa:3480  | IGF1R    | IPI00027232 | hsa:8651  | SOCS1  | IPI00021491 | 2.816469 |
| hsa:5587  | PRKD1    | IPI00782950 | hsa:5335  | PLCG1  | IPI00016736 | 2.778171 |
| hsa:5587  | PRKD1    | IPI00782950 | hsa:5336  | PLCG2  | IPI00329185 | 2.778171 |
| hsa:207   | AKT1     | IPI00012866 | hsa:673   | BRAF   | IPI00303797 | 2.770234 |
| hsa:207   | AKT1     | IPI00012866 | hsa:5894  | RAF1   | IPI00021786 | 2.770234 |
| hsa:5747  | PTK2     | IPI00012885 | hsa:5335  | PLCG1  | IPI00016736 | 2.768262 |
| hsa:2185  | PTK2B    | IPI00029702 | hsa:5921  | RASA1  | IPI00026262 | 2.768262 |
| hsa:29126 | CD274    | IPI00023021 | hsa:5133  | PDCD1  | IPI00014830 | 2.748933 |
| hsa:5819  | PVRL2    | IPI00022661 | hsa:10666 | CD226  | IPI00008578 | 2.748933 |
| hsa:80380 | PDCD1LG2 | IPI00414542 | hsa:5133  | PDCD1  | IPI00014830 | 2.748933 |
| hsa:649   | BMP1     | IPI00009054 | hsa:1294  | COL7A1 | IPI00025418 | 2.744902 |
| hsa:3694  | ITGB6    | IPI00000151 | hsa:2335  | FN1    | IPI00022418 | 2.744902 |
| hsa:1311  | COMP     | IPI00028030 | hsa:2335  | FN1    | IPI00022418 | 2.744902 |
| hsa:4147  | MATN2    | IPI00168520 | hsa:2335  | FN1    | IPI00022418 | 2.744902 |
| hsa:4225  | MEP1B    | IPI00178015 | hsa:2335  | FN1    | IPI00022418 | 2.744902 |
| hsa:4224  | MEP1A    | IPI00004372 | hsa:2335  | FN1    | IPI00022418 | 2.744902 |
| hsa:7057  | THBS1    | IPI00296099 | hsa:2335  | FN1    | IPI00022418 | 2.744902 |
| hsa:3371  | TNC      | IPI00031008 | hsa:2335  | FN1    | IPI00022418 | 2.744902 |
| hsa:3690  | ITGB3    | IPI00303283 | hsa:2335  | FN1    | IPI00022418 | 2.744902 |
| hsa:4052  | LTBP1    | IPI00220249 | hsa:2335  | FN1    | IPI00022418 | 2.744902 |
| hsa:3695  | ITGB7    | IPI00297880 | hsa:2335  | FN1    | IPI00022418 | 2.744902 |
| hsa:2199  | FBLN2    | IPI00023824 | hsa:2335  | FN1    | IPI00022418 | 2.744902 |
| hsa:3688  | ITGB1    | IPI00217563 | hsa:2335  | FN1    | IPI00022418 | 2.744902 |
| hsa:7057  | THBS1    | IPI00296099 | hsa:1294  | COL7A1 | IPI00025418 | 2.744902 |

|           |              |             |           |           |             |          |
|-----------|--------------|-------------|-----------|-----------|-------------|----------|
| hsa:8506  | CNTNAP1      | IPI00219249 | hsa:5787  | PTPRB     | IPI00295577 | 2.744902 |
| hsa:5058  | PAK1         | IPI00656138 | hsa:5580  | PRKCD     | IPI00329236 | 2.73809  |
| hsa:5580  | PRKCD        | IPI00329236 | hsa:156   | ADRBK1    | IPI00012497 | 2.729197 |
| hsa:5566  | PRKACA730418 | IPI00396630 | hsa:156   | ADRBK1    | IPI00012497 | 2.729197 |
| hsa:4153  | MBL2         | IPI00004373 | hsa:10747 | MASP2     | IPI00294713 | 2.709711 |
| hsa:4153  | MBL2         | IPI00004373 | hsa:22918 | CD93      | IPI00299485 | 2.709711 |
| hsa:2208  | FCER2        | IPI00027491 | hsa:3689  | ITGB2     | IPI00291792 | 2.709711 |
| hsa:7123  | CLEC3B       | IPI00009028 | hsa:5327  | PLAT      | IPI00019590 | 2.709711 |
| hsa:6436  | SFTPA2       | unknown     | hsa:22918 | CD93      | IPI00299485 | 2.709711 |
| hsa:6714  | SRC          | IPI00641230 | hsa:1606  | DGKA      | IPI00333143 | 2.708721 |
| hsa:5058  | PAK1         | IPI00656138 | hsa:5335  | PLCG1     | IPI00016736 | 2.705097 |
| hsa:3572  | IL6ST        | IPI00297124 | hsa:2065  | ERBB3     | IPI00298285 | 2.692116 |
| hsa:2017  | CTTN         | IPI00029601 | hsa:55139 | ANKZF1    | IPI00335437 | 2.692116 |
| hsa:2017  | CTTN         | IPI00029601 | hsa:83992 | CTTNBP2   | IPI00103869 | 2.692116 |
| hsa:4867  | NPHP1        | IPI00028739 | hsa:27130 | INVS      | IPI00034309 | 2.692116 |
| hsa:1739  | DLG1         | IPI00030351 | hsa:27165 | GLS2      | IPI00296219 | 2.692116 |
| hsa:1739  | DLG1         | IPI00030351 | hsa:85461 | TANC1     | IPI00645890 | 2.692116 |
| hsa:1742  | DLG4         | IPI00619928 | hsa:27165 | GLS2      | IPI00296219 | 2.692116 |
| hsa:1742  | DLG4         | IPI00619928 | hsa:23390 | ZDHHC17   | IPI00216753 | 2.692116 |
| hsa:1742  | DLG4         | IPI00619928 | hsa:50944 | SHANK1    | IPI00007695 | 2.692116 |
| hsa:1742  | DLG4         | IPI00619928 | hsa:85461 | TANC1     | IPI00645890 | 2.692116 |
| hsa:7082  | TJP1         | IPI00216219 | hsa:7223  | TRPC4     | IPI00002689 | 2.692116 |
| hsa:6709  | SPTAN1       | IPI00844215 | hsa:85461 | TANC1     | IPI00645890 | 2.692116 |
| hsa:6709  | SPTAN1       | IPI00844215 | hsa:286   | ANK1      | IPI00216697 | 2.692116 |
| hsa:11252 | PACSIN2      | IPI00027009 | hsa:59341 | TRPV4     | IPI00168624 | 2.692116 |
| hsa:1399  | CRKL         | IPI00004839 | hsa:57498 | KIDINS220 | IPI00384909 | 2.692116 |
| hsa:1741  | DLG3         | IPI00023343 | hsa:27165 | GLS2      | IPI00296219 | 2.692116 |
| hsa:1740  | DLG2         | IPI00444727 | hsa:27165 | GLS2      | IPI00296219 | 2.692116 |
| hsa:10458 | BAIAP2       | IPI00299088 | hsa:50944 | SHANK1    | IPI00007695 | 2.692116 |
| hsa:23048 | FNBP1        | IPI00807625 | hsa:8658  | TNKS      | IPI00021493 | 2.692116 |
| hsa:50944 | SHANK1       | IPI00007695 | hsa:85461 | TANC1     | IPI00645890 | 2.692116 |
| hsa:29993 | PACSIN1      | IPI00011515 | hsa:59341 | TRPV4     | IPI00168624 | 2.692116 |
| hsa:29763 | PACSIN3      | IPI00329572 | hsa:59341 | TRPV4     | IPI00168624 | 2.692116 |
| hsa:1969  | EPHA2        | IPI00021267 | hsa:5747  | PTK2      | IPI00012885 | 2.692115 |
| hsa:6093  | ROCK1        | IPI00022542 | hsa:3985  | LIMK2     | IPI00022872 | 2.677971 |
| hsa:6093  | ROCK1        | IPI00022542 | hsa:3984  | LIMK1     | IPI00291702 | 2.677971 |
| hsa:4804  | NGFR         | IPI00027436 | hsa:4914  | NTRK1     | IPI00025076 | 2.676974 |
| hsa:4804  | NGFR         | IPI00027436 | hsa:5567  | PRKACB    | IPI00395654 | 2.676974 |
| hsa:4804  | NGFR         | IPI00027436 | hsa:5594  | MAPK1     | IPI00003479 | 2.676974 |
| hsa:4804  | NGFR         | IPI00027436 | hsa:5595  | MAPK3     | IPI00018195 | 2.676974 |
| hsa:8476  | CDC42BPA     | IPI00640468 | hsa:3984  | LIMK1     | IPI00291702 | 2.668952 |
| hsa:8476  | CDC42BPA     | IPI00640468 | hsa:3985  | LIMK2     | IPI00022872 | 2.668952 |
| hsa:5792  | PTPRF        | IPI00107831 | hsa:3643  | INSR      | IPI00220325 | 2.658319 |
| hsa:2048  | EPHB2        | IPI00021275 | hsa:7410  | VAV2      | IPI00446303 | 2.649347 |
| hsa:3643  | INSR         | IPI00220325 | hsa:7409  | VAV1      | IPI00011696 | 2.649347 |
| hsa:3480  | IGF1R        | IPI00027232 | hsa:23365 | ARHGEF12  | IPI00339353 | 2.645573 |
| hsa:3454  | IFNAR1       | IPI00012877 | hsa:7535  | ZAP70     | IPI00329789 | 2.640565 |
| hsa:3454  | IFNAR1       | IPI00012877 | hsa:3932  | LCK       | IPI00394952 | 2.640565 |
| hsa:3454  | IFNAR1       | IPI00012877 | hsa:7297  | TYK2      | IPI00022353 | 2.640565 |
| hsa:3572  | IL6ST        | IPI00297124 | hsa:7297  | TYK2      | IPI00022353 | 2.640565 |
| hsa:2690  | GHR          | IPI00023599 | hsa:7297  | TYK2      | IPI00022353 | 2.640565 |
| hsa:5618  | PRLR         | IPI00028640 | hsa:7535  | ZAP70     | IPI00329789 | 2.640565 |
| hsa:5618  | PRLR         | IPI00028640 | hsa:7006  | TEC       | IPI00000878 | 2.640565 |
| hsa:1439  | CSF2RB       | IPI00465234 | hsa:3055  | HCK       | IPI00646510 | 2.640565 |
| hsa:1441  | CSF3R        | IPI00012936 | hsa:3055  | HCK       | IPI00646510 | 2.640565 |
| hsa:3572  | IL6ST        | IPI00297124 | hsa:3055  | HCK       | IPI00646510 | 2.640565 |
| hsa:3561  | IL2RG        | IPI00012899 | hsa:3716  | JAK1      | IPI00443765 | 2.640565 |
| hsa:3575  | IL7R         | IPI00292014 | hsa:3716  | JAK1      | IPI00443765 | 2.640565 |
| hsa:50615 | IL21R        | IPI00034249 | hsa:3716  | JAK1      | IPI00443765 | 2.640565 |
| hsa:1439  | CSF2RB       | IPI00465234 | hsa:3716  | JAK1      | IPI00443765 | 2.640565 |

|            |            |             |           |        |             |          |
|------------|------------|-------------|-----------|--------|-------------|----------|
| hsa:1441   | CSF3R      | IPI00012936 | hsa:3716  | JAK1   | IPI00443765 | 2.640565 |
| hsa:9180   | OSMR       | IPI00022674 | hsa:3716  | JAK1   | IPI00443765 | 2.640565 |
| hsa:2690   | GHR        | IPI00023599 | hsa:3716  | JAK1   | IPI00443765 | 2.640565 |
| hsa:3572   | IL6ST      | IPI00297124 | hsa:3716  | JAK1   | IPI00443765 | 2.640565 |
| hsa:3566   | IL4R       | IPI00444383 | hsa:3716  | JAK1   | IPI00443765 | 2.640565 |
| hsa:3566   | IL4R       | IPI00444383 | hsa:3717  | JAK2   | IPI00031016 | 2.640565 |
| hsa:4352   | MPL        | IPI00027637 | hsa:3717  | JAK2   | IPI00031016 | 2.640565 |
| hsa:64109  | CRLF264109 | IPI00030172 | hsa:3717  | JAK2   | IPI00031016 | 2.640565 |
| hsa:149233 | IL23R      | IPI00303045 | hsa:3717  | JAK2   | IPI00031016 | 2.640565 |
| hsa:9180   | OSMR       | IPI00022674 | hsa:3717  | JAK2   | IPI00031016 | 2.640565 |
| hsa:3595   | IL12RB2    | IPI00438855 | hsa:3717  | JAK2   | IPI00031016 | 2.640565 |
| hsa:3953   | LEPR       | IPI00009243 | hsa:3717  | JAK2   | IPI00031016 | 2.640565 |
| hsa:2690   | GHR        | IPI00023599 | hsa:3717  | JAK2   | IPI00031016 | 2.640565 |
| hsa:5618   | PRLR       | IPI00028640 | hsa:3717  | JAK2   | IPI00031016 | 2.640565 |
| hsa:3460   | IFNGR2     | IPI00221193 | hsa:3717  | JAK2   | IPI00031016 | 2.640565 |
| hsa:1439   | CSF2RB     | IPI00465234 | hsa:3717  | JAK2   | IPI00031016 | 2.640565 |
| hsa:1441   | CSF3R      | IPI00012936 | hsa:3717  | JAK2   | IPI00031016 | 2.640565 |
| hsa:2057   | EPOR       | IPI00017476 | hsa:3717  | JAK2   | IPI00031016 | 2.640565 |
| hsa:1439   | CSF2RB     | IPI00465234 | hsa:3932  | LCK    | IPI00394952 | 2.640565 |
| hsa:1441   | CSF3R      | IPI00012936 | hsa:3932  | LCK    | IPI00394952 | 2.640565 |
| hsa:1439   | CSF2RB     | IPI00465234 | hsa:2242  | FES    | IPI00294344 | 2.640565 |
| hsa:3566   | IL4R       | IPI00444383 | hsa:2242  | FES    | IPI00294344 | 2.640565 |
| hsa:1439   | CSF2RB     | IPI00465234 | hsa:6850  | SYK    | IPI00018597 | 2.640565 |
| hsa:1441   | CSF3R      | IPI00012936 | hsa:6850  | SYK    | IPI00018597 | 2.640565 |
| hsa:2057   | EPOR       | IPI00017476 | hsa:6850  | SYK    | IPI00018597 | 2.640565 |
| hsa:3561   | IL2RG      | IPI00012899 | hsa:3718  | JAK3   | IPI00002773 | 2.640565 |
| hsa:3575   | IL7R       | IPI00292014 | hsa:3718  | JAK3   | IPI00002773 | 2.640565 |
| hsa:3566   | IL4R       | IPI00444383 | hsa:3718  | JAK3   | IPI00002773 | 2.640565 |
| hsa:1438   | CSF2RA1438 | IPI00012009 | hsa:4067  | LYN    | IPI00298625 | 2.640565 |
| hsa:1439   | CSF2RB     | IPI00465234 | hsa:4067  | LYN    | IPI00298625 | 2.640565 |
| hsa:1441   | CSF3R      | IPI00012936 | hsa:4067  | LYN    | IPI00298625 | 2.640565 |
| hsa:3575   | IL7R       | IPI00292014 | hsa:4067  | LYN    | IPI00298625 | 2.640565 |
| hsa:2057   | EPOR       | IPI00017476 | hsa:4067  | LYN    | IPI00298625 | 2.640565 |
| hsa:1439   | CSF2RB     | IPI00465234 | hsa:2534  | FYN    | IPI00219012 | 2.640565 |
| hsa:3575   | IL7R       | IPI00292014 | hsa:2534  | FYN    | IPI00219012 | 2.640565 |
| hsa:3597   | IL13RA1    | IPI00020354 | hsa:7297  | TYK2   | IPI00022353 | 2.640565 |
| hsa:54961  | SSH3       | IPI00218486 | hsa:3984  | LIMK1  | IPI00291702 | 2.640252 |
| hsa:5728   | PTEN       | IPI00012587 | hsa:22983 | MAST1  | IPI00027883 | 2.640252 |
| hsa:5728   | PTEN       | IPI00012587 | hsa:23139 | MAST2  | IPI00514071 | 2.640252 |
| hsa:5728   | PTEN       | IPI00012587 | hsa:23031 | MAST3  | IPI00028932 | 2.640252 |
| hsa:10256  | CNKSRR1    | IPI00299824 | hsa:5900  | RALGDS | IPI00290395 | 2.632291 |
| hsa:11113  | CIT        | IPI00022465 | hsa:1742  | DLG4   | IPI00619928 | 2.622999 |
| hsa:5979   | RET        | IPI00013983 | hsa:2887  | GRB10  | IPI00012752 | 2.619811 |
| hsa:5979   | RET        | IPI00013983 | hsa:2886  | GRB7   | IPI00448767 | 2.619811 |
| hsa:5594   | MAPK1      | IPI00003479 | hsa:2887  | GRB10  | IPI00012752 | 2.619811 |
| hsa:1956   | EGFR       | IPI00018274 | hsa:2888  | GRB14  | IPI00030917 | 2.619811 |
| hsa:1956   | EGFR       | IPI00018274 | hsa:2887  | GRB10  | IPI00012752 | 2.619811 |
| hsa:1956   | EGFR       | IPI00018274 | hsa:2886  | GRB7   | IPI00448767 | 2.619811 |
| hsa:5604   | MAP2K1     | IPI00219604 | hsa:2887  | GRB10  | IPI00012752 | 2.619811 |
| hsa:2064   | ERBB2      | IPI00300384 | hsa:2886  | GRB7   | IPI00448767 | 2.619811 |
| hsa:4914   | NTRK1      | IPI00025076 | hsa:10603 | SH2B2  | IPI00155706 | 2.619811 |
| hsa:4914   | NTRK1      | IPI00025076 | hsa:25970 | SH2B1  | IPI00016441 | 2.619811 |
| hsa:11184  | MAP4K1     | IPI00020258 | hsa:27071 | DAPP1  | IPI00384620 | 2.619811 |
| hsa:2064   | ERBB2      | IPI00300384 | hsa:10019 | SH2B3  | IPI00010821 | 2.619811 |
| hsa:2064   | ERBB2      | IPI00300384 | hsa:10603 | SH2B2  | IPI00155706 | 2.619811 |
| hsa:2064   | ERBB2      | IPI00300384 | hsa:6452  | SH3BP2 | IPI00218997 | 2.619811 |
| hsa:1147   | CHUK       | IPI00005104 | hsa:55620 | STAP2  | IPI00383883 | 2.619811 |
| hsa:3551   | IKBKB      | IPI00024709 | hsa:55620 | STAP2  | IPI00383883 | 2.619811 |
| hsa:9020   | MAP3K14    | IPI00016099 | hsa:2886  | GRB7   | IPI00448767 | 2.619811 |
| hsa:9020   | MAP3K14    | IPI00016099 | hsa:2887  | GRB10  | IPI00012752 | 2.619811 |



|            |           |             |           |          |             |          |
|------------|-----------|-------------|-----------|----------|-------------|----------|
| hsa:9020   | MAP3K14   | IPI00016099 | hsa:2888  | GRB14    | IPI00030917 | 2.619811 |
| hsa:1956   | EGFR      | IPI00018274 | hsa:10019 | SH2B3    | IPI00010821 | 2.619811 |
| hsa:1956   | EGFR      | IPI00018274 | hsa:25970 | SH2B1    | IPI00016441 | 2.619811 |
| hsa:5292   | PIM1      | IPI00005014 | hsa:660   | BMX      | IPI00020899 | 2.619811 |
| hsa:558    | AXL       | IPI00397361 | hsa:5335  | PLCG1    | IPI00016736 | 2.619201 |
| hsa:7046   | TGFBR1    | IPI00005733 | hsa:54212 | SNTG1    | IPI00071897 | 2.616758 |
| hsa:5894   | RAF1      | IPI00021786 | hsa:10256 | CNKSR1   | IPI00299824 | 2.616758 |
| hsa:2066   | ERBB4     | IPI00016371 | hsa:6645  | SNTB2    | IPI00009505 | 2.616758 |
| hsa:6300   | MAPK12    | IPI00296283 | hsa:6641  | SNTB1    | IPI00026059 | 2.616758 |
| hsa:6789   | STK4      | IPI00011488 | hsa:10256 | CNKSR1   | IPI00299824 | 2.616758 |
| hsa:1017   | CDK2      | IPI00031681 | hsa:22866 | CNKSR2   | IPI00435208 | 2.616758 |
| hsa:23043  | TNIK      | IPI00145805 | hsa:22866 | CNKSR2   | IPI00435208 | 2.616758 |
| hsa:2185   | PTK2B     | IPI00029702 | hsa:57584 | ARHGAP21 | IPI00867539 | 2.616758 |
| hsa:6300   | MAPK12    | IPI00296283 | hsa:6640  | SNTA1    | IPI00164528 | 2.616758 |
| hsa:5609   | MAP2K7    | IPI00023636 | hsa:10256 | CNKSR1   | IPI00299824 | 2.616758 |
| hsa:6788   | STK3      | IPI00411984 | hsa:10256 | CNKSR1   | IPI00299824 | 2.616758 |
| hsa:5605   | MAP2K2    | IPI00003783 | hsa:10256 | CNKSR1   | IPI00299824 | 2.616758 |
| hsa:3932   | LCK       | IPI00394952 | hsa:6452  | SH3BP2   | IPI00218997 | 2.608884 |
| hsa:3932   | LCK       | IPI00394952 | hsa:27071 | DAPP1    | IPI00384620 | 2.608884 |
| hsa:3932   | LCK       | IPI00394952 | hsa:10019 | SH2B3    | IPI00010821 | 2.608884 |
| hsa:6714   | SRC       | IPI00641230 | hsa:27071 | DAPP1    | IPI00384620 | 2.608884 |
| hsa:6714   | SRC       | IPI00641230 | hsa:55620 | STAP2    | IPI00383883 | 2.608884 |
| hsa:6714   | SRC       | IPI00641230 | hsa:2887  | GRB10    | IPI00012752 | 2.608884 |
| hsa:25     | ABL129892 | IPI00216969 | hsa:6452  | SH3BP2   | IPI00218997 | 2.608884 |
| hsa:4067   | LYN       | IPI00298625 | hsa:27071 | DAPP1    | IPI00384620 | 2.608884 |
| hsa:4067   | LYN       | IPI00298625 | hsa:10603 | SH2B2    | IPI00155706 | 2.608884 |
| hsa:2534   | FYN       | IPI00219012 | hsa:6452  | SH3BP2   | IPI00218997 | 2.608884 |
| hsa:2534   | FYN       | IPI00219012 | hsa:10603 | SH2B2    | IPI00155706 | 2.608884 |
| hsa:2534   | FYN       | IPI00219012 | hsa:2887  | GRB10    | IPI00012752 | 2.608884 |
| hsa:5753   | PTK6      | IPI00015927 | hsa:55620 | STAP2    | IPI00383883 | 2.608884 |
| hsa:2885   | GRB2      | IPI00021327 | hsa:10603 | SH2B2    | IPI00155706 | 2.597957 |
| hsa:2885   | GRB2      | IPI00021327 | hsa:6452  | SH3BP2   | IPI00218997 | 2.597957 |
| hsa:2885   | GRB2      | IPI00021327 | hsa:2886  | GRB7     | IPI00448767 | 2.597957 |
| hsa:2885   | GRB2      | IPI00021327 | hsa:25970 | SH2B1    | IPI00016441 | 2.597957 |
| hsa:2885   | GRB2      | IPI00021327 | hsa:10019 | SH2B3    | IPI00010821 | 2.597957 |
| hsa:10451  | VAV3      | IPI00299763 | hsa:6452  | SH3BP2   | IPI00218997 | 2.597957 |
| hsa:27240  | SIT1      | IPI00004407 | hsa:7535  | ZAP70    | IPI00329789 | 2.583534 |
| hsa:11184  | MAP4K1    | IPI00020258 | hsa:6850  | SYK      | IPI00018597 | 2.583534 |
| hsa:1956   | EGFR      | IPI00018274 | hsa:5604  | MAP2K1   | IPI00219604 | 2.57891  |
| hsa:10188  | TNK2      | IPI00167089 | hsa:4168  | MCF2     | IPI00339309 | 2.575325 |
| hsa:3570   | IL6R      | IPI00031171 | hsa:6774  | STAT3    | IPI00784414 | 2.573295 |
| hsa:5747   | PTK2      | IPI00012885 | hsa:2886  | GRB7     | IPI00448767 | 2.565707 |
| hsa:2185   | PTK2B     | IPI00029702 | hsa:26228 | STAP1    | IPI00015876 | 2.565707 |
| hsa:5747   | PTK2      | IPI00012885 | hsa:660   | BMX      | IPI00020899 | 2.565707 |
| hsa:4224   | MEP1A     | IPI00004372 | hsa:5340  | PLG      | IPI00019580 | 2.565577 |
| hsa:6850   | SYK       | IPI00018597 | hsa:5587  | PRKD1    | IPI00782950 | 2.56501  |
| hsa:6464   | SHC1      | IPI00645103 | hsa:5578  | PRKCA    | IPI00385449 | 2.56387  |
| hsa:1154   | CISH      | IPI00017281 | hsa:5578  | PRKCA    | IPI00385449 | 2.56387  |
| hsa:1154   | CISH      | IPI00017281 | hsa:5579  | PRKCB1   | IPI00010466 | 2.56387  |
| hsa:5979   | RET       | IPI00013983 | hsa:9260  | PDLIM7   | IPI00023122 | 2.562342 |
| hsa:659    | BMPR2     | IPI00783156 | hsa:3984  | LIMK1    | IPI00291702 | 2.562342 |
| hsa:57144  | PAK7      | IPI00001814 | hsa:9260  | PDLIM7   | IPI00023122 | 2.562342 |
| hsa:140901 | STK35     | IPI00291457 | hsa:9124  | PDLIM1   | IPI00010414 | 2.562342 |
| hsa:9261   | MAPKAPK2  | IPI00026054 | hsa:3984  | LIMK1    | IPI00291702 | 2.562342 |
| hsa:1432   | MAPK14    | IPI00002857 | hsa:3984  | LIMK1    | IPI00291702 | 2.562342 |
| hsa:57144  | PAK7      | IPI00001814 | hsa:9260  | PDLIM7   | IPI00023122 | 2.562342 |
| hsa:7075   | TIE1      | IPI00019530 | hsa:5295  | PIK3R1   | IPI00021448 | 2.535018 |
| hsa:7046   | TGFBR1    | IPI00005733 | hsa:9459  | ARHGFEF6 | IPI00014256 | 2.524005 |
| hsa:7048   | TGFBR2    | IPI00020431 | hsa:8874  | ARHGFEF7 | IPI00449906 | 2.524005 |
| hsa:7048   | TGFBR2    | IPI00020431 | hsa:9459  | ARHGFEF6 | IPI00014256 | 2.524005 |

|           |           |             |           |          |             |          |
|-----------|-----------|-------------|-----------|----------|-------------|----------|
| hsa:658   | BMPR1B    | IPI00010862 | hsa:9459  | ARHGEF6  | IPI00014256 | 2.524005 |
| hsa:2048  | EPHB2     | IPI00021275 | hsa:9459  | ARHGEF6  | IPI00014256 | 2.524005 |
| hsa:2043  | EPHA4     | IPI00008318 | hsa:25791 | NGEF     | IPI00166928 | 2.524005 |
| hsa:1432  | MAPK14    | IPI00002857 | hsa:8202  | NCOA3    | IPI00220079 | 2.520278 |
| hsa:1019  | CDK4      | IPI00007811 | hsa:10499 | NCOA2    | IPI00018251 | 2.520278 |
| hsa:5594  | MAPK1     | IPI00003479 | hsa:8648  | NCOA1    | IPI00470490 | 2.520278 |
| hsa:5594  | MAPK1     | IPI00003479 | hsa:8202  | NCOA3    | IPI00220079 | 2.520278 |
| hsa:5595  | MAPK3     | IPI00018195 | hsa:3091  | HIF1A    | IPI00003442 | 2.520278 |
| hsa:1457  | CSNK2A1   | IPI00744507 | hsa:3091  | HIF1A    | IPI00003442 | 2.520278 |
| hsa:1453  | CSNK1D    | IPI00011102 | hsa:8863  | PER3     | IPI00010692 | 2.520278 |
| hsa:1453  | CSNK1D    | IPI00011102 | hsa:5187  | PER1     | IPI00440484 | 2.520278 |
| hsa:1454  | CSNK1E    | IPI00027729 | hsa:8863  | PER3     | IPI00010692 | 2.520278 |
| hsa:1454  | CSNK1E    | IPI00027729 | hsa:5187  | PER1     | IPI00440484 | 2.520278 |
| hsa:2932  | GSK3B     | IPI00028570 | hsa:8202  | NCOA3    | IPI00220079 | 2.520278 |
| hsa:1457  | CSNK2A1   | IPI00744507 | hsa:405   | ARNT     | IPI00514749 | 2.520278 |
| hsa:3551  | IKBKB     | IPI00024709 | hsa:8202  | NCOA3    | IPI00220079 | 2.520278 |
| hsa:1147  | CHUK      | IPI00005104 | hsa:8202  | NCOA3    | IPI00220079 | 2.520278 |
| hsa:1454  | CSNK1E    | IPI00027729 | hsa:406   | ARNTL    | IPI00412162 | 2.520278 |
| hsa:8576  | STK16     | IPI00872027 | hsa:23178 | PASK     | IPI00398824 | 2.520278 |
| hsa:5777  | PTPN6     | IPI00218604 | hsa:5580  | PRKCD    | IPI00329236 | 2.502374 |
| hsa:2043  | EPHA4     | IPI00008318 | hsa:2534  | FYN      | IPI00219012 | 2.501292 |
| hsa:3932  | LCK       | IPI00394952 | hsa:6464  | SHC1     | IPI00645103 | 2.49471  |
| hsa:6714  | SRC       | IPI00641230 | hsa:6464  | SHC1     | IPI00645103 | 2.49471  |
| hsa:4067  | LYN       | IPI00298625 | hsa:6464  | SHC1     | IPI00645103 | 2.49471  |
| hsa:1445  | CSK       | IPI00013212 | hsa:6464  | SHC1     | IPI00645103 | 2.49471  |
| hsa:2534  | FYN       | IPI00219012 | hsa:6464  | SHC1     | IPI00645103 | 2.49471  |
| hsa:5364  | PLXNB1    | IPI00455329 | hsa:9826  | ARHGEF11 | IPI00157442 | 2.493749 |
| hsa:5361  | PLXNA1    | IPI00552671 | hsa:207   | AKT1     | IPI00012866 | 2.493749 |
| hsa:23654 | PLXNB2    | IPI00853369 | hsa:23365 | ARHGEF12 | IPI00339353 | 2.493749 |
| hsa:5364  | PLXNB1    | IPI00455329 | hsa:23365 | ARHGEF12 | IPI00339353 | 2.493749 |
| hsa:23654 | PLXNB2    | IPI00853369 | hsa:9826  | ARHGEF11 | IPI00157442 | 2.493749 |
| hsa:3055  | HCK       | IPI00646510 | hsa:23607 | CD2AP    | IPI00412771 | 2.484057 |
| hsa:3055  | HCK       | IPI00646510 | hsa:30011 | SH3KBP1  | IPI00294962 | 2.484057 |
| hsa:3716  | JAK1      | IPI00443765 | hsa:8027  | STAM     | IPI00020178 | 2.484057 |
| hsa:3716  | JAK1      | IPI00443765 | hsa:10254 | STAM2    | IPI00290542 | 2.484057 |
| hsa:3717  | JAK2      | IPI00031016 | hsa:10254 | STAM2    | IPI00290542 | 2.484057 |
| hsa:3717  | JAK2      | IPI00031016 | hsa:8027  | STAM     | IPI00020178 | 2.484057 |
| hsa:3932  | LCK       | IPI00394952 | hsa:4739  | NEDD9    | IPI00031407 | 2.484057 |
| hsa:2241  | FER       | IPI00029263 | hsa:2017  | CTTN     | IPI00029601 | 2.484057 |
| hsa:6714  | SRC       | IPI00641230 | hsa:2533  | FYB      | IPI00446986 | 2.484057 |
| hsa:6714  | SRC       | IPI00641230 | hsa:9644  | SH3PXD2A | IPI00640092 | 2.484057 |
| hsa:6714  | SRC       | IPI00641230 | hsa:23607 | CD2AP    | IPI00412771 | 2.484057 |
| hsa:6714  | SRC       | IPI00641230 | hsa:2017  | CTTN     | IPI00029601 | 2.484057 |
| hsa:6850  | SYK       | IPI00018597 | hsa:28988 | DBNL     | IPI00456925 | 2.484057 |
| hsa:6850  | SYK       | IPI00018597 | hsa:3059  | HCLS1    | IPI00026156 | 2.484057 |
| hsa:6850  | SYK       | IPI00018597 | hsa:2017  | CTTN     | IPI00029601 | 2.484057 |
| hsa:3718  | JAK3      | IPI00002773 | hsa:10254 | STAM2    | IPI00290542 | 2.484057 |
| hsa:3718  | JAK3      | IPI00002773 | hsa:8027  | STAM     | IPI00020178 | 2.484057 |
| hsa:25    | ABL129892 | IPI00216969 | hsa:10006 | ABI1     | IPI00431025 | 2.484057 |
| hsa:25    | ABL129892 | IPI00216969 | hsa:8470  | SORBS2   | IPI00477876 | 2.484057 |
| hsa:25    | ABL129892 | IPI00216969 | hsa:4739  | NEDD9    | IPI00031407 | 2.484057 |
| hsa:25    | ABL129892 | IPI00216969 | hsa:10152 | ABI2     | IPI00442210 | 2.484057 |
| hsa:25    | ABL129892 | IPI00216969 | hsa:10580 | SORBS1   | IPI00186452 | 2.484057 |
| hsa:25    | ABL129892 | IPI00216969 | hsa:274   | BIN1     | IPI00186966 | 2.484057 |
| hsa:4067  | LYN       | IPI00298625 | hsa:4739  | NEDD9    | IPI00031407 | 2.484057 |
| hsa:2534  | FYN       | IPI00219012 | hsa:4739  | NEDD9    | IPI00031407 | 2.484057 |
| hsa:2534  | FYN       | IPI00219012 | hsa:23607 | CD2AP    | IPI00412771 | 2.484057 |
| hsa:2534  | FYN       | IPI00219012 | hsa:2533  | FYB      | IPI00446986 | 2.484057 |
| hsa:7297  | TYK2      | IPI00022353 | hsa:10254 | STAM2    | IPI00290542 | 2.484057 |
| hsa:27    | ABL2      | IPI00329488 | hsa:8470  | SORBS2   | IPI00477876 | 2.484057 |

|           |         |             |           |          |             |          |
|-----------|---------|-------------|-----------|----------|-------------|----------|
| hsa:7535  | ZAP70   | IPI00329789 | hsa:28988 | DBNL     | IPI00456925 | 2.484057 |
| hsa:4067  | LYN     | IPI00298625 | hsa:3059  | HCLS1    | IPI00026156 | 2.484057 |
| hsa:2268  | FGR     | IPI00016871 | hsa:3059  | HCLS1    | IPI00026156 | 2.484057 |
| hsa:7525  | YES1    | IPI00013981 | hsa:23607 | CD2AP    | IPI00412771 | 2.484057 |
| hsa:7074  | TIAM1   | IPI00011400 | hsa:3265  | HRAS     | IPI00000006 | 2.475408 |
| hsa:7074  | TIAM1   | IPI00011400 | hsa:5879  | RAC1     | IPI00010271 | 2.475408 |
| hsa:5802  | PTPRS   | IPI00289831 | hsa:11021 | RAB35    | IPI00300096 | 2.475139 |
| hsa:3556  | IL1RAP  | IPI00031789 | hsa:5879  | RAC1     | IPI00010271 | 2.475139 |
| hsa:5678  | PSG9    | IPI00293461 | hsa:1915  | EEF1A1   | IPI00396485 | 2.475139 |
| hsa:5678  | PSG9    | IPI00293461 | hsa:1915  | EEF1A1   | IPI00396485 | 2.475139 |
| hsa:7082  | TJP1    | IPI00216219 | hsa:5339  | PLEC1    | IPI00014898 | 2.467773 |
| hsa:2885  | GRB2    | IPI00021327 | hsa:5339  | PLEC1    | IPI00014898 | 2.467773 |
| hsa:4703  | NEB     | IPI00303335 | hsa:81    | ACTN4    | IPI00013808 | 2.467773 |
| hsa:10529 | NEBL    | IPI00844035 | hsa:87    | ACTN1    | IPI00013508 | 2.467773 |
| hsa:54869 | EPS8L1  | IPI00301250 | hsa:88    | ACTN2    | IPI00019884 | 2.467773 |
| hsa:1742  | DLG4    | IPI00619928 | hsa:88    | ACTN2    | IPI00019884 | 2.467773 |
| hsa:1739  | DLG1    | IPI00030351 | hsa:88    | ACTN2    | IPI00019884 | 2.467773 |
| hsa:7082  | TJP1    | IPI00216219 | hsa:81    | ACTN4    | IPI00013808 | 2.467773 |
| hsa:7046  | TGFBR1  | IPI00005733 | hsa:8935  | SKAP2    | IPI00022508 | 2.464272 |
| hsa:5747  | PTK2    | IPI00012885 | hsa:23092 | ARHGAP26 | IPI00007913 | 2.464272 |
| hsa:3643  | INSR    | IPI00220325 | hsa:23092 | ARHGAP26 | IPI00007913 | 2.464272 |
| hsa:29941 | PKN3    | IPI00413780 | hsa:23092 | ARHGAP26 | IPI00007913 | 2.464272 |
| hsa:29941 | PKN3    | IPI00413780 | hsa:79658 | ARHGAP10 | IPI00290332 | 2.464272 |
| hsa:5058  | PAK1    | IPI00656138 | hsa:8874  | ARHGEF7  | IPI00449906 | 2.460392 |
| hsa:5058  | PAK1    | IPI00656138 | hsa:9459  | ARHGEF6  | IPI00014256 | 2.460392 |
| hsa:5062  | PAK2    | IPI00787208 | hsa:8874  | ARHGEF7  | IPI00449906 | 2.460392 |
| hsa:5063  | PAK3    | IPI00410084 | hsa:8874  | ARHGEF7  | IPI00449906 | 2.460392 |
| hsa:5063  | PAK3    | IPI00410084 | hsa:9459  | ARHGEF6  | IPI00014256 | 2.460392 |
| hsa:25865 | PRKD2   | IPI00009334 | hsa:9260  | PDLIM7   | IPI00023122 | 2.44856  |
| hsa:5578  | PRKCA   | IPI00385449 | hsa:846   | CASR     | IPI00012817 | 2.432069 |
| hsa:5579  | PRKCB1  | IPI00010466 | hsa:846   | CASR     | IPI00012817 | 2.432069 |
| hsa:5582  | PRKCG   | IPI00007128 | hsa:846   | CASR     | IPI00012817 | 2.432069 |
| hsa:2264  | FGFR4   | IPI00304578 | hsa:5335  | PLCG1    | IPI00016736 | 2.431625 |
| hsa:3791  | KDR     | IPI00021396 | hsa:5336  | PLCG2    | IPI00329185 | 2.431625 |
| hsa:3791  | KDR     | IPI00021396 | hsa:5335  | PLCG1    | IPI00016736 | 2.431625 |
| hsa:2321  | FLT1    | IPI00018335 | hsa:5335  | PLCG1    | IPI00016736 | 2.431625 |
| hsa:3815  | KIT     | IPI00022296 | hsa:5335  | PLCG1    | IPI00016736 | 2.431625 |
| hsa:2263  | FGFR2   | IPI00010680 | hsa:5335  | PLCG1    | IPI00016736 | 2.431625 |
| hsa:5156  | PDGFRA  | IPI00027721 | hsa:5335  | PLCG1    | IPI00016736 | 2.431625 |
| hsa:5159  | PDGFRB  | IPI00015902 | hsa:5335  | PLCG1    | IPI00016736 | 2.431625 |
| hsa:2260  | FGFR1   | IPI00005142 | hsa:5335  | PLCG1    | IPI00016736 | 2.431625 |
| hsa:3815  | KIT     | IPI00022296 | hsa:5921  | RASA1    | IPI00026262 | 2.431625 |
| hsa:3791  | KDR     | IPI00021396 | hsa:5921  | RASA1    | IPI00026262 | 2.431625 |
| hsa:5159  | PDGFRB  | IPI00015902 | hsa:5921  | RASA1    | IPI00026262 | 2.431625 |
| hsa:1436  | CSF1R   | IPI00011218 | hsa:5921  | RASA1    | IPI00026262 | 2.431625 |
| hsa:2321  | FLT1    | IPI00018335 | hsa:5336  | PLCG2    | IPI00329185 | 2.431625 |
| hsa:51285 | RASL12  | IPI00009813 | hsa:7046  | TGFBR1   | IPI00005733 | 2.430268 |
| hsa:51285 | RASL12  | IPI00009813 | hsa:90    | ACVR1    | IPI00029219 | 2.430268 |
| hsa:51285 | RASL12  | IPI00009813 | hsa:658   | BMP1B    | IPI00010862 | 2.430268 |
| hsa:394   | ARHGAP5 | IPI00013988 | hsa:2185  | PTK2B    | IPI00029702 | 2.430268 |
| hsa:4735  | 2-Sep   | IPI00014177 | hsa:9641  | IKBKE    | IPI00029045 | 2.430268 |
| hsa:11184 | MAP4K1  | IPI00020258 | hsa:4296  | MAP3K11  | IPI00000977 | 2.427995 |
| hsa:5593  | PRKG2   | IPI00012322 | hsa:3927  | LASP1    | IPI00000861 | 2.427995 |
| hsa:5592  | PRKG1   | IPI00436355 | hsa:3927  | LASP1    | IPI00000861 | 2.427995 |
| hsa:1022  | CDK7    | IPI00000685 | hsa:3927  | LASP1    | IPI00000861 | 2.427995 |
| hsa:5871  | MAP4K2  | IPI00149094 | hsa:4296  | MAP3K11  | IPI00000977 | 2.427995 |
| hsa:2048  | EPHB2   | IPI00021275 | hsa:4690  | NCK1     | IPI00028065 | 2.424963 |
| hsa:1969  | EPHA2   | IPI00021267 | hsa:5296  | PIK3R2   | IPI00011736 | 2.424963 |
| hsa:1969  | EPHA2   | IPI00021267 | hsa:6503  | SLA      | IPI00009499 | 2.424963 |
| hsa:3643  | INSR    | IPI00220325 | hsa:10451 | VAV3     | IPI00299763 | 2.424963 |

|           |              |             |           |          |             |          |
|-----------|--------------|-------------|-----------|----------|-------------|----------|
| hsa:2047  | EPHB1        | IPI00008315 | hsa:4690  | NCK1     | IPI00028065 | 2.424963 |
| hsa:2051  | EPHB6        | IPI00005222 | hsa:2885  | GRB2     | IPI00021327 | 2.424963 |
| hsa:2048  | EPHB2        | IPI00021275 | hsa:2885  | GRB2     | IPI00021327 | 2.424963 |
| hsa:2047  | EPHB1        | IPI00008315 | hsa:2885  | GRB2     | IPI00021327 | 2.424963 |
| hsa:7010  | TEK          | IPI00412829 | hsa:2885  | GRB2     | IPI00021327 | 2.424963 |
| hsa:1969  | EPHA2        | IPI00021267 | hsa:2885  | GRB2     | IPI00021327 | 2.424963 |
| hsa:2051  | EPHB6        | IPI00005222 | hsa:1398  | CRK      | IPI00004838 | 2.424963 |
| hsa:2049  | EPHB3        | IPI00289329 | hsa:1398  | CRK      | IPI00004838 | 2.424963 |
| hsa:2042  | EPHA3        | IPI00298105 | hsa:1398  | CRK      | IPI00004838 | 2.424963 |
| hsa:3643  | INSR         | IPI00220325 | hsa:1398  | CRK      | IPI00004838 | 2.424963 |
| hsa:3480  | IGF1R        | IPI00027232 | hsa:1398  | CRK      | IPI00004838 | 2.424963 |
| hsa:2051  | EPHB6        | IPI00005222 | hsa:1399  | CRKL     | IPI00004839 | 2.424963 |
| hsa:3643  | INSR         | IPI00220325 | hsa:1399  | CRKL     | IPI00004839 | 2.424963 |
| hsa:3480  | IGF1R        | IPI00027232 | hsa:1399  | CRKL     | IPI00004839 | 2.424963 |
| hsa:3480  | IGF1R        | IPI00027232 | hsa:5296  | PIK3R2   | IPI00011736 | 2.424963 |
| hsa:6098  | ROS1         | IPI00288965 | hsa:10451 | VAV3     | IPI00299763 | 2.424963 |
| hsa:3480  | IGF1R        | IPI00027232 | hsa:10451 | VAV3     | IPI00299763 | 2.424963 |
| hsa:3689  | ITGB2        | IPI00291792 | hsa:5657  | PRTN3    | IPI00027409 | 2.421444 |
| hsa:3689  | ITGB2        | IPI00291792 | hsa:3240  | HP       | IPI00431645 | 2.421444 |
| hsa:7039  | TGFA         | IPI00872280 | hsa:1991  | ELA2     | IPI00027769 | 2.421444 |
| hsa:8874  | ARHGEF7      | IPI00449906 | hsa:9459  | ARHGEF6  | IPI00014256 | 2.418417 |
| hsa:5062  | PAK2         | IPI00787208 | hsa:79658 | ARHGAP10 | IPI00290332 | 2.41183  |
| hsa:5566  | PRKACA730418 | IPI00396630 | hsa:6711  | SPTBN1   | IPI00005614 | 2.410016 |
| hsa:1457  | CSNK2A1      | IPI00744507 | hsa:6711  | SPTBN1   | IPI00005614 | 2.410016 |
| hsa:11035 | RIPK3        | IPI00294938 | hsa:6711  | SPTBN1   | IPI00005614 | 2.410016 |
| hsa:4215  | MAP3K3       | IPI00017801 | hsa:6711  | SPTBN1   | IPI00005614 | 2.410016 |
| hsa:9641  | IKBKE        | IPI00029045 | hsa:6711  | SPTBN1   | IPI00005614 | 2.410016 |
| hsa:11035 | RIPK3        | IPI00294938 | hsa:23164 | M-RIP    | IPI00305344 | 2.410016 |
| hsa:23043 | TNIK         | IPI00145805 | hsa:6711  | SPTBN1   | IPI00005614 | 2.410016 |
| hsa:4215  | MAP3K3       | IPI00017801 | hsa:23164 | M-RIP    | IPI00305344 | 2.410016 |
| hsa:50488 | MINK1        | IPI00166680 | hsa:6712  | SPTBN2   | IPI00012645 | 2.410016 |
| hsa:1326  | MAP3K8       | IPI00298726 | hsa:6711  | SPTBN1   | IPI00005614 | 2.410016 |
| hsa:5584  | PRKCI        | IPI00016639 | hsa:5604  | MAP2K1   | IPI00219604 | 2.393528 |
| hsa:2185  | PTK2B        | IPI00029702 | hsa:7409  | VAV1     | IPI00011696 | 2.377348 |
| hsa:4233  | MET          | IPI00029273 | hsa:7409  | VAV1     | IPI00011696 | 2.373007 |
| hsa:5594  | MAPK1        | IPI00003479 | hsa:7409  | VAV1     | IPI00011696 | 2.373007 |
| hsa:1956  | EGFR         | IPI00018274 | hsa:7410  | VAV2     | IPI00446303 | 2.373007 |
| hsa:1956  | EGFR         | IPI00018274 | hsa:7409  | VAV1     | IPI00011696 | 2.373007 |
| hsa:2064  | ERBB2        | IPI00300384 | hsa:7410  | VAV2     | IPI00446303 | 2.373007 |
| hsa:2064  | ERBB2        | IPI00300384 | hsa:7409  | VAV1     | IPI00011696 | 2.373007 |
| hsa:4752  | NEK3         | IPI00465101 | hsa:7409  | VAV1     | IPI00011696 | 2.373007 |
| hsa:4752  | NEK3         | IPI00465101 | hsa:7410  | VAV2     | IPI00446303 | 2.373007 |
| hsa:558   | AXL          | IPI00397361 | hsa:8651  | SOCS1    | IPI00021491 | 2.372382 |
| hsa:558   | AXL          | IPI00397361 | hsa:8503  | PIK3R3   | IPI00513745 | 2.372382 |
| hsa:558   | AXL          | IPI00397361 | hsa:23371 | TENC1    | IPI00465295 | 2.372382 |
| hsa:558   | AXL          | IPI00397361 | hsa:6464  | SHC1     | IPI00645103 | 2.372382 |
| hsa:558   | AXL          | IPI00397361 | hsa:53358 | SHC3     | IPI00409679 | 2.372382 |
| hsa:558   | AXL          | IPI00397361 | hsa:5295  | PIK3R1   | IPI00021448 | 2.372382 |
| hsa:7301  | TYRO3        | IPI00030887 | hsa:5295  | PIK3R1   | IPI00021448 | 2.372382 |
| hsa:6850  | SYK          | IPI00018597 | hsa:5578  | PRKCA    | IPI00385449 | 2.35971  |
| hsa:7297  | TYK2         | IPI00022353 | hsa:5578  | PRKCA    | IPI00385449 | 2.35971  |
| hsa:3716  | JAK1         | IPI00443765 | hsa:5578  | PRKCA    | IPI00385449 | 2.35971  |
| hsa:10461 | MERTK        | IPI00029756 | hsa:7409  | VAV1     | IPI00011696 | 2.345561 |
| hsa:5581  | PRKCE        | IPI00024539 | hsa:5894  | RAF1     | IPI00021786 | 2.339686 |
| hsa:5578  | PRKCA        | IPI00385449 | hsa:5894  | RAF1     | IPI00021786 | 2.339686 |
| hsa:5578  | PRKCA        | IPI00385449 | hsa:673   | BRAF     | IPI00303797 | 2.339686 |
| hsa:5581  | PRKCE        | IPI00024539 | hsa:673   | BRAF     | IPI00303797 | 2.339686 |
| hsa:10298 | PAK4         | IPI00014068 | hsa:2263  | FGFR2    | IPI00010680 | 2.320614 |
| hsa:3716  | JAK1         | IPI00443765 | hsa:2885  | GRB2     | IPI00021327 | 2.318839 |
| hsa:3717  | JAK2         | IPI00031016 | hsa:2885  | GRB2     | IPI00021327 | 2.318839 |

|           |          |             |           |              |             |          |
|-----------|----------|-------------|-----------|--------------|-------------|----------|
| hsa:6850  | SYK      | IPI00018597 | hsa:1399  | CRKL         | IPI00004839 | 2.318839 |
| hsa:6850  | SYK      | IPI00018597 | hsa:6503  | SLA          | IPI00009499 | 2.318839 |
| hsa:6850  | SYK      | IPI00018597 | hsa:2885  | GRB2         | IPI00021327 | 2.318839 |
| hsa:7297  | TYK2     | IPI00022353 | hsa:1399  | CRKL         | IPI00004839 | 2.318839 |
| hsa:7535  | ZAP70    | IPI00329789 | hsa:84174 | SLA2         | IPI00030447 | 2.318839 |
| hsa:7535  | ZAP70    | IPI00329789 | hsa:6503  | SLA          | IPI00009499 | 2.318839 |
| hsa:7535  | ZAP70    | IPI00329789 | hsa:1399  | CRKL         | IPI00004839 | 2.318839 |
| hsa:7535  | ZAP70    | IPI00329789 | hsa:2885  | GRB2         | IPI00021327 | 2.318839 |
| hsa:7535  | ZAP70    | IPI00329789 | hsa:1398  | CRK          | IPI00004838 | 2.318839 |
| hsa:5774  | PTPN3    | IPI00289649 | hsa:25865 | PRKD2        | IPI00009334 | 2.307022 |
| hsa:7046  | TGFBR1   | IPI00005733 | hsa:3702  | ITK          | IPI00004566 | 2.306968 |
| hsa:3654  | IRAK1    | IPI00293652 | hsa:695   | BTK          | IPI00029132 | 2.306968 |
| hsa:4868  | NPHS1    | unknown     | hsa:8440  | NCK2         | IPI00306531 | 2.304392 |
| hsa:4868  | NPHS1    | unknown     | hsa:4690  | NCK1         | IPI00028065 | 2.304392 |
| hsa:1630  | DCC      | IPI00016422 | hsa:4690  | NCK1         | IPI00028065 | 2.304392 |
| hsa:3691  | ITGB4    | IPI00027422 | hsa:7525  | YES1         | IPI00013981 | 2.293671 |
| hsa:3691  | ITGB4    | IPI00027422 | hsa:2534  | FYN          | IPI00219012 | 2.293671 |
| hsa:634   | CEACAM1  | IPI00009938 | hsa:1088  | CEACAM8      | IPI00013972 | 2.290215 |
| hsa:634   | CEACAM1  | IPI00009938 | hsa:4680  | CEACAM6      | IPI00027412 | 2.290215 |
| hsa:5817  | PVR      | IPI00299158 | hsa:10666 | CD226        | IPI00008578 | 2.290215 |
| hsa:10733 | PLK4     | IPI00410344 | hsa:7006  | TEC          | IPI00000878 | 2.290014 |
| hsa:580   | BARD1    | IPI00017746 | hsa:983   | CDC2         | IPI00073536 | 2.28805  |
| hsa:3122  | HLA-DRA  | IPI00005171 | hsa:3127  | HLA-DRB53123 | IPI00746734 | 2.28737  |
| hsa:3122  | HLA-DRA  | IPI00005171 | hsa:3123  | HLA-DRB1     | unknown     | 2.28737  |
| hsa:3113  | HLA-DPA1 | IPI00021711 | hsa:3115  | HLA-DPB1     | IPI00472206 | 2.28737  |
| hsa:3108  | HLA-DMA  | IPI00291924 | hsa:3123  | HLA-DRB1     | unknown     | 2.28737  |
| hsa:3118  | HLA-DQA2 | IPI00005172 | hsa:3119  | HLA-DQB1     | IPI00005186 | 2.28737  |
| hsa:3117  | HLA-DQA1 | IPI00289658 | hsa:3119  | HLA-DQB1     | IPI00005186 | 2.28737  |
| hsa:11183 | MAP4K5   | IPI00294842 | hsa:25    | ABL129892    | IPI00216969 | 2.285202 |
| hsa:11184 | MAP4K1   | IPI00020258 | hsa:25    | ABL129892    | IPI00216969 | 2.285202 |
| hsa:11184 | MAP4K1   | IPI00020258 | hsa:4067  | LYN          | IPI00298625 | 2.285202 |
| hsa:207   | AKT1     | IPI00012866 | hsa:3551  | IKBKB        | IPI00024709 | 2.281515 |
| hsa:207   | AKT1     | IPI00012866 | hsa:1147  | CHUK         | IPI00005104 | 2.281515 |
| hsa:208   | AKT2     | IPI00012870 | hsa:1147  | CHUK         | IPI00005104 | 2.281515 |
| hsa:2261  | FGFR3    | IPI00027174 | hsa:25970 | SH2B1        | IPI00016441 | 2.254387 |
| hsa:2260  | FGFR1    | IPI00005142 | hsa:6452  | SH3BP2       | IPI00218997 | 2.254387 |
| hsa:2260  | FGFR1    | IPI00005142 | hsa:2888  | GRB14        | IPI00030917 | 2.254387 |
| hsa:2322  | FLT3     | IPI00748391 | hsa:6452  | SH3BP2       | IPI00218997 | 2.254387 |
| hsa:3815  | KIT      | IPI00022296 | hsa:2887  | GRB10        | IPI00012752 | 2.254387 |
| hsa:3815  | KIT      | IPI00022296 | hsa:2886  | GRB7         | IPI00448767 | 2.254387 |
| hsa:3815  | KIT      | IPI00022296 | hsa:10603 | SH2B2        | IPI00155706 | 2.254387 |
| hsa:3815  | KIT      | IPI00022296 | hsa:26228 | STAP1        | IPI00015876 | 2.254387 |
| hsa:3815  | KIT      | IPI00022296 | hsa:10019 | SH2B3        | IPI00010821 | 2.254387 |
| hsa:5159  | PDGFRB   | IPI00015902 | hsa:2886  | GRB7         | IPI00448767 | 2.254387 |
| hsa:5159  | PDGFRB   | IPI00015902 | hsa:2888  | GRB14        | IPI00030917 | 2.254387 |
| hsa:5159  | PDGFRB   | IPI00015902 | hsa:2887  | GRB10        | IPI00012752 | 2.254387 |
| hsa:3791  | KDR      | IPI00021396 | hsa:2887  | GRB10        | IPI00012752 | 2.254387 |
| hsa:5156  | PDGFRA   | IPI00027721 | hsa:2888  | GRB14        | IPI00030917 | 2.254387 |
| hsa:3932  | LCK      | IPI00394952 | hsa:1739  | DLG1         | IPI00030351 | 2.242069 |
| hsa:4067  | LYN      | IPI00298625 | hsa:1742  | DLG4         | IPI00619928 | 2.242069 |
| hsa:7525  | YES1     | IPI00013981 | hsa:1742  | DLG4         | IPI00619928 | 2.242069 |
| hsa:2534  | FYN      | IPI00219012 | hsa:1742  | DLG4         | IPI00619928 | 2.242069 |
| hsa:5781  | PTPN11   | IPI00658023 | hsa:780   | DDR1         | IPI00001477 | 2.226038 |
| hsa:5781  | PTPN11   | IPI00658023 | hsa:5595  | MAPK3        | IPI00018195 | 2.226038 |
| hsa:5781  | PTPN11   | IPI00658023 | hsa:1147  | CHUK         | IPI00005104 | 2.226038 |
| hsa:5781  | PTPN11   | IPI00658023 | hsa:4914  | NTRK1        | IPI00025076 | 2.226038 |
| hsa:5781  | PTPN11   | IPI00658023 | hsa:4216  | MAP3K4       | IPI00386260 | 2.226038 |
| hsa:5781  | PTPN11   | IPI00658023 | hsa:1956  | EGFR         | IPI00018274 | 2.226038 |
| hsa:5781  | PTPN11   | IPI00658023 | hsa:5979  | RET          | IPI00013983 | 2.226038 |
| hsa:5781  | PTPN11   | IPI00658023 | hsa:4233  | MET          | IPI00029273 | 2.226038 |

|           |           |             |            |           |             |          |
|-----------|-----------|-------------|------------|-----------|-------------|----------|
| hsa:5777  | PTPN6     | IPI00218604 | hsa:1956   | EGFR      | IPI00018274 | 2.226038 |
| hsa:5781  | PTPN11    | IPI00658023 | hsa:2064   | ERBB2     | IPI00300384 | 2.226038 |
| hsa:5777  | PTPN6     | IPI00218604 | hsa:4216   | MAP3K4    | IPI00386260 | 2.226038 |
| hsa:5781  | PTPN11    | IPI00658023 | hsa:2066   | ERBB4     | IPI00016371 | 2.226038 |
| hsa:6640  | SNTA1     | IPI00164528 | hsa:4842   | NOS1      | IPI00217225 | 2.220995 |
| hsa:9267  | PSCD1     | IPI00478608 | hsa:9595   | PSCDBP    | IPI00003591 | 2.220995 |
| hsa:1785  | DNM2      | IPI00033022 | hsa:22941  | SHANK2    | IPI00220490 | 2.220995 |
| hsa:7074  | TIAM1     | IPI00011400 | hsa:56288  | PARD3     | IPI00154915 | 2.220995 |
| hsa:10603 | SH2B2     | IPI00155706 | hsa:9260   | PDLIM7    | IPI00023122 | 2.220995 |
| hsa:10256 | CNKSR1    | IPI00299824 | hsa:114822 | RHPN1     | IPI00154752 | 2.220995 |
| hsa:9265  | PSCD3     | IPI00013892 | hsa:160622 | GRASP     | IPI00333325 | 2.220995 |
| hsa:6242  | RTKN      | IPI00029834 | hsa:57120  | GOPC      | IPI00186721 | 2.220995 |
| hsa:8874  | ARHGEF7   | IPI00449906 | hsa:23513  | SCRIB     | IPI00425560 | 2.220995 |
| hsa:59339 | PLEKHA2   | IPI00455835 | hsa:8777   | MPDZ      | IPI00552988 | 2.220995 |
| hsa:23095 | KIF1B     | IPI00029011 | hsa:10755  | GIPC1     | IPI00024705 | 2.220995 |
| hsa:84904 | C9orf100  | IPI00181892 | hsa:1856   | DVL2      | IPI00023103 | 2.220995 |
| hsa:7074  | TIAM1     | IPI00011400 | hsa:84687  | PPP1R9B   | IPI00816035 | 2.220995 |
| hsa:23095 | KIF1B     | IPI00029011 | hsa:6640   | SNTA1     | IPI00164528 | 2.220995 |
| hsa:10276 | NET1      | IPI00385312 | hsa:9223   | MAGI1     | IPI00470759 | 2.220995 |
| hsa:22866 | CNKSR2    | IPI00435208 | hsa:57554  | LRRC7     | IPI00426267 | 2.220995 |
| hsa:1894  | ECT2      | IPI00787864 | hsa:50855  | PARD6A    | IPI00027217 | 2.220995 |
| hsa:6242  | RTKN      | IPI00029834 | hsa:30851  | TAX1BP3   | IPI00005585 | 2.220995 |
| hsa:59338 | PLEKHA1   | IPI00306354 | hsa:8777   | MPDZ      | IPI00552988 | 2.220995 |
| hsa:59338 | PLEKHA1   | IPI00306354 | hsa:5783   | PTPN13    | IPI00030246 | 2.220995 |
| hsa:22866 | CNKSR2    | IPI00435208 | hsa:5998   | RGS3      | IPI00181533 | 2.220995 |
| hsa:23095 | KIF1B     | IPI00029011 | hsa:10207  | INADL     | IPI00304064 | 2.220995 |
| hsa:22866 | CNKSR2    | IPI00435208 | hsa:10207  | INADL     | IPI00304064 | 2.220995 |
| hsa:9265  | PSCD3     | IPI00013892 | hsa:10256  | CNKSR1    | IPI00299824 | 2.220995 |
| hsa:8874  | ARHGEF7   | IPI00449906 | hsa:22941  | SHANK2    | IPI00220490 | 2.220995 |
| hsa:59339 | PLEKHA2   | IPI00455835 | hsa:5783   | PTPN13    | IPI00030246 | 2.220995 |
| hsa:9265  | PSCD3     | IPI00013892 | hsa:10256  | CNKSR1    | IPI00299824 | 2.220995 |
| hsa:84904 | C9orf100  | IPI00181892 | hsa:1856   | DVL2      | IPI00023103 | 2.220995 |
| hsa:2885  | GRB2      | IPI00021327 | hsa:23164  | M-RIP     | IPI00305344 | 2.211697 |
| hsa:2048  | EPHB2     | IPI00021275 | hsa:27     | ABL2      | IPI00329488 | 2.210683 |
| hsa:2048  | EPHB2     | IPI00021275 | hsa:6714   | SRC       | IPI00641230 | 2.210683 |
| hsa:2048  | EPHB2     | IPI00021275 | hsa:25     | ABL129892 | IPI00216969 | 2.210683 |
| hsa:2049  | EPHB3     | IPI00289329 | hsa:2534   | FYN       | IPI00219012 | 2.210683 |
| hsa:5062  | PAK2      | IPI00787208 | hsa:6714   | SRC       | IPI00641230 | 2.206641 |
| hsa:5062  | PAK2      | IPI00787208 | hsa:25     | ABL129892 | IPI00216969 | 2.206641 |
| hsa:1432  | MAPK14    | IPI00002857 | hsa:4772   | NFATC1    | IPI00032069 | 2.205244 |
| hsa:1432  | MAPK14    | IPI00002857 | hsa:4776   | NFATC4    | IPI00292684 | 2.205244 |
| hsa:1019  | CDK4      | IPI00007811 | hsa:595    | CCND1     | IPI00028098 | 2.205244 |
| hsa:7048  | TGFBR2    | IPI00020431 | hsa:9133   | CCNB2     | IPI00028266 | 2.205244 |
| hsa:7048  | TGFBR2    | IPI00020431 | hsa:891    | CCNB1     | IPI00745793 | 2.205244 |
| hsa:5599  | MAPK8     | IPI00024672 | hsa:5966   | REL       | IPI00029773 | 2.205244 |
| hsa:1020  | CDK5      | IPI00023530 | hsa:91768  | CABLES1   | IPI00291427 | 2.205244 |
| hsa:1020  | CDK5      | IPI00023530 | hsa:81928  | CABLES2   | IPI00030512 | 2.205244 |
| hsa:1020  | CDK5      | IPI00023530 | hsa:900    | CCNG1     | IPI00021335 | 2.205244 |
| hsa:5585  | PKN1      | IPI00002803 | hsa:905    | CCNT2     | IPI00030313 | 2.205244 |
| hsa:25    | ABL129892 | IPI00216969 | hsa:91768  | CABLES1   | IPI00291427 | 2.205244 |
| hsa:25    | ABL129892 | IPI00216969 | hsa:81928  | CABLES2   | IPI00030512 | 2.205244 |
| hsa:983   | CDC2      | IPI00073536 | hsa:8900   | CCNA1     | IPI00019284 | 2.205244 |
| hsa:983   | CDC2      | IPI00073536 | hsa:9133   | CCNB2     | IPI00028266 | 2.205244 |
| hsa:983   | CDC2      | IPI00073536 | hsa:898    | CCNE1     | IPI00031077 | 2.205244 |
| hsa:983   | CDC2      | IPI00073536 | hsa:891    | CCNB1     | IPI00745793 | 2.205244 |
| hsa:983   | CDC2      | IPI00073536 | hsa:890    | CCNA2     | IPI00022865 | 2.205244 |
| hsa:5578  | PRKCA     | IPI00385449 | hsa:4772   | NFATC1    | IPI00032069 | 2.205244 |
| hsa:1452  | CSNK1A1   | IPI00183400 | hsa:4775   | NFATC3    | IPI00030369 | 2.205244 |
| hsa:5590  | PRKCZ     | IPI00013749 | hsa:4773   | NFATC2    | IPI00297845 | 2.205244 |
| hsa:2932  | GSK3B     | IPI00028570 | hsa:898    | CCNE1     | IPI00031077 | 2.205244 |

|           |              |             |           |         |             |          |
|-----------|--------------|-------------|-----------|---------|-------------|----------|
| hsa:1017  | CDK2         | IPI00031681 | hsa:9133  | CCNB2   | IPI00028266 | 2.205244 |
| hsa:1017  | CDK2         | IPI00031681 | hsa:902   | CCNH    | IPI00021305 | 2.205244 |
| hsa:1017  | CDK2         | IPI00031681 | hsa:8812  | CCNK    | IPI00411579 | 2.205244 |
| hsa:1017  | CDK2         | IPI00031681 | hsa:8900  | CCNA1   | IPI00019284 | 2.205244 |
| hsa:1017  | CDK2         | IPI00031681 | hsa:9134  | CCNE2   | IPI00014085 | 2.205244 |
| hsa:1017  | CDK2         | IPI00031681 | hsa:85417 | CCNB3   | IPI00152849 | 2.205244 |
| hsa:1017  | CDK2         | IPI00031681 | hsa:898   | CCNE1   | IPI00031077 | 2.205244 |
| hsa:5347  | PLK1         | IPI00021248 | hsa:699   | BUB1    | IPI00783305 | 2.205244 |
| hsa:5347  | PLK1         | IPI00021248 | hsa:7465  | WEE1    | IPI00025830 | 2.205244 |
| hsa:5347  | PLK1         | IPI00021248 | hsa:9088  | PKMYT1  | IPI00384765 | 2.205244 |
| hsa:1025  | CDK9         | IPI00301923 | hsa:8812  | CCNK    | IPI00411579 | 2.205244 |
| hsa:1025  | CDK9         | IPI00301923 | hsa:905   | CCNT2   | IPI00030313 | 2.205244 |
| hsa:1018  | CDK3         | IPI00023503 | hsa:9134  | CCNE2   | IPI00014085 | 2.205244 |
| hsa:1018  | CDK3         | IPI00023503 | hsa:91768 | CABLES1 | IPI00291427 | 2.205244 |
| hsa:1018  | CDK3         | IPI00023503 | hsa:81928 | CABLES2 | IPI00030512 | 2.205244 |
| hsa:1018  | CDK3         | IPI00023503 | hsa:898   | CCNE1   | IPI00031077 | 2.205244 |
| hsa:1022  | CDK7         | IPI00000685 | hsa:902   | CCNH    | IPI00021305 | 2.205244 |
| hsa:5601  | MAPK9        | IPI00024673 | hsa:4775  | NFATC3  | IPI00030369 | 2.205244 |
| hsa:984   | CDC2L1       | IPI00215999 | hsa:81669 | CCNL2   | IPI00066458 | 2.205244 |
| hsa:1024  | CDK8         | IPI00026791 | hsa:902   | CCNH    | IPI00021305 | 2.205244 |
| hsa:1859  | DYRK1A       | IPI00014344 | hsa:81669 | CCNL2   | IPI00066458 | 2.205244 |
| hsa:56893 | UBQLN4       | IPI00024502 | hsa:28951 | TRIB2   | IPI00012516 | 2.205244 |
| hsa:1147  | CHUK         | IPI00005104 | hsa:5971  | RELB    | IPI00221034 | 2.205244 |
| hsa:1452  | CSNK1A1      | IPI00183400 | hsa:4776  | NFATC4  | IPI00292684 | 2.205244 |
| hsa:5747  | PTK2         | IPI00012885 | hsa:8900  | CCNA1   | IPI00019284 | 2.205244 |
| hsa:1453  | CSNK1D       | IPI00011102 | hsa:8900  | CCNA1   | IPI00019284 | 2.205244 |
| hsa:1025  | CDK9         | IPI00301923 | hsa:904   | CCNT1   | IPI00030247 | 2.205244 |
| hsa:1111  | CHEK1        | IPI00023664 | hsa:5970  | RELA    | IPI00386448 | 2.205244 |
| hsa:814   | CAMK4        | IPI00430411 | hsa:5970  | RELA    | IPI00386448 | 2.205244 |
| hsa:29110 | TBK1         | IPI00293613 | hsa:5970  | RELA    | IPI00386448 | 2.205244 |
| hsa:6885  | MAP3K7       | IPI00295738 | hsa:5970  | RELA    | IPI00386448 | 2.205244 |
| hsa:5608  | MAP2K6       | IPI00003814 | hsa:5970  | RELA    | IPI00386448 | 2.205244 |
| hsa:695   | BTK          | IPI00029132 | hsa:5970  | RELA    | IPI00386448 | 2.205244 |
| hsa:1326  | MAP3K8       | IPI00298726 | hsa:5970  | RELA    | IPI00386448 | 2.205244 |
| hsa:1147  | CHUK         | IPI00005104 | hsa:5970  | RELA    | IPI00386448 | 2.205244 |
| hsa:57761 | TRIB3        | IPI00290307 | hsa:5970  | RELA    | IPI00386448 | 2.205244 |
| hsa:9252  | RPS6KA5      | IPI00335101 | hsa:5970  | RELA    | IPI00386448 | 2.205244 |
| hsa:3551  | IKBKB        | IPI00024709 | hsa:5970  | RELA    | IPI00386448 | 2.205244 |
| hsa:5566  | PRKACA730418 | IPI00396630 | hsa:5970  | RELA    | IPI00386448 | 2.205244 |
| hsa:5590  | PRKCZ        | IPI00013749 | hsa:5970  | RELA    | IPI00386448 | 2.205244 |
| hsa:1025  | CDK9         | IPI00301923 | hsa:5970  | RELA    | IPI00386448 | 2.205244 |
| hsa:1457  | CSNK2A1      | IPI00744507 | hsa:5970  | RELA    | IPI00386448 | 2.205244 |
| hsa:2932  | GSK3B        | IPI00028570 | hsa:595   | CCND1   | IPI00028098 | 2.205244 |
| hsa:1021  | CDK6         | IPI00023529 | hsa:595   | CCND1   | IPI00028098 | 2.205244 |
| hsa:5566  | PRKACA730418 | IPI00396630 | hsa:595   | CCND1   | IPI00028098 | 2.205244 |
| hsa:10733 | PLK4         | IPI00410344 | hsa:7046  | TGFBR1  | IPI00005733 | 2.205244 |
| hsa:1263  | PLK3         | IPI00304186 | hsa:5594  | MAPK1   | IPI00003479 | 2.205244 |
| hsa:2580  | GAK          | IPI00298949 | hsa:900   | CCNG1   | IPI00021335 | 2.205244 |
| hsa:1018  | CDK3         | IPI00023503 | hsa:890   | CCNA2   | IPI00022865 | 2.205244 |
| hsa:1017  | CDK2         | IPI00031681 | hsa:890   | CCNA2   | IPI00022865 | 2.205244 |
| hsa:55872 | PBK          | IPI00306708 | hsa:891   | CCNB1   | IPI00745793 | 2.205244 |
| hsa:5891  | RAGE         | IPI00413657 | hsa:891   | CCNB1   | IPI00745793 | 2.205244 |
| hsa:9088  | PKMYT1       | IPI00384765 | hsa:891   | CCNB1   | IPI00745793 | 2.205244 |
| hsa:5347  | PLK1         | IPI00021248 | hsa:891   | CCNB1   | IPI00745793 | 2.205244 |
| hsa:5292  | PIM1         | IPI00005014 | hsa:4772  | NFATC1  | IPI00032069 | 2.205244 |
| hsa:1024  | CDK8         | IPI00026791 | hsa:1030  | CDKN2B  | IPI00001563 | 2.205244 |
| hsa:1326  | MAP3K8       | IPI00298726 | hsa:5966  | REL     | IPI00029773 | 2.205244 |
| hsa:5129  | PCTK3        | IPI00383457 | hsa:8812  | CCNK    | IPI00411579 | 2.205244 |
| hsa:56893 | UBQLN4       | IPI00024502 | hsa:1760  | DMPK    | IPI00305254 | 2.205244 |
| hsa:1454  | CSNK1E       | IPI00027729 | hsa:8900  | CCNA1   | IPI00019284 | 2.205244 |

|            |         |             |           |           |             |          |
|------------|---------|-------------|-----------|-----------|-------------|----------|
| hsa:8767   | RIPK2   | IPI00021917 | hsa:4773  | NFATC2    | IPI00297845 | 2.205244 |
| hsa:1017   | CDK2    | IPI00031681 | hsa:595   | CCND1     | IPI00028098 | 2.205244 |
| hsa:5129   | PCTK3   | IPI00383457 | hsa:8812  | CCNK      | IPI00411579 | 2.205244 |
| hsa:2212   | FCGR2A  | IPI00023505 | hsa:51206 | GP6       | IPI00737479 | 2.197164 |
| hsa:6098   | ROS1    | IPI00288965 | hsa:25    | ABL129892 | IPI00216969 | 2.183093 |
| hsa:5747   | PTK2    | IPI00012885 | hsa:7145  | TNS1      | IPI00384868 | 2.181806 |
| hsa:5747   | PTK2    | IPI00012885 | hsa:8835  | SOCS2     | IPI00033944 | 2.181806 |
| hsa:5747   | PTK2    | IPI00012885 | hsa:6464  | SHC1      | IPI00645103 | 2.181806 |
| hsa:5747   | PTK2    | IPI00012885 | hsa:5295  | PIK3R1    | IPI00021448 | 2.181806 |
| hsa:2185   | PTK2B   | IPI00029702 | hsa:10044 | SH2D3C    | IPI00171093 | 2.181806 |
| hsa:2185   | PTK2B   | IPI00029702 | hsa:7535  | ZAP70     | IPI00329789 | 2.181806 |
| hsa:2185   | PTK2B   | IPI00029702 | hsa:6774  | STAT3     | IPI00784414 | 2.181806 |
| hsa:2185   | PTK2B   | IPI00029702 | hsa:3716  | JAK1      | IPI00443765 | 2.181806 |
| hsa:2185   | PTK2B   | IPI00029702 | hsa:3717  | JAK2      | IPI00031016 | 2.181806 |
| hsa:5747   | PTK2    | IPI00012885 | hsa:3717  | JAK2      | IPI00031016 | 2.181806 |
| hsa:2185   | PTK2B   | IPI00029702 | hsa:6850  | SYK       | IPI00018597 | 2.181806 |
| hsa:5747   | PTK2    | IPI00012885 | hsa:6850  | SYK       | IPI00018597 | 2.181806 |
| hsa:2185   | PTK2B   | IPI00029702 | hsa:3718  | JAK3      | IPI00002773 | 2.181806 |
| hsa:5747   | PTK2    | IPI00012885 | hsa:6772  | STAT1     | IPI00030781 | 2.181806 |
| hsa:2185   | PTK2B   | IPI00029702 | hsa:6464  | SHC1      | IPI00645103 | 2.181806 |
| hsa:2185   | PTK2B   | IPI00029702 | hsa:5295  | PIK3R1    | IPI00021448 | 2.181806 |
| hsa:5747   | PTK2    | IPI00012885 | hsa:8835  | SOCS2     | IPI00033944 | 2.181806 |
| hsa:695    | BTK     | IPI00029132 | hsa:25998 | IBTK      | IPI00792333 | 2.174695 |
| hsa:5592   | PRKG1   | IPI00436355 | hsa:5894  | RAF1      | IPI00021786 | 2.155916 |
| hsa:7525   | YES1    | IPI00013981 | hsa:7159  | TP53BP2   | IPI00337588 | 2.149143 |
| hsa:5879   | RAC1    | IPI00010271 | hsa:4216  | MAP3K4    | IPI00386260 | 2.145471 |
| hsa:5879   | RAC1    | IPI00010271 | hsa:6198  | RPS6KB1   | IPI00216132 | 2.145471 |
| hsa:5879   | RAC1    | IPI00010271 | hsa:5578  | PRKCA     | IPI00385449 | 2.145471 |
| hsa:375    | ARF1    | IPI00215914 | hsa:3643  | INSR      | IPI00220325 | 2.145471 |
| hsa:3265   | HRAS    | IPI00000006 | hsa:3656  | IRAK2     | IPI00304986 | 2.145471 |
| hsa:3265   | HRAS    | IPI00000006 | hsa:3654  | IRAK1     | IPI00293652 | 2.145471 |
| hsa:998    | CDC42   | IPI00007189 | hsa:5601  | MAPK9     | IPI00024673 | 2.145471 |
| hsa:998    | CDC42   | IPI00007189 | hsa:6198  | RPS6KB1   | IPI00216132 | 2.145471 |
| hsa:998    | CDC42   | IPI00007189 | hsa:4216  | MAP3K4    | IPI00386260 | 2.145471 |
| hsa:5861   | RAB1A   | IPI00005719 | hsa:57143 | ADCK1     | IPI00787836 | 2.145471 |
| hsa:5881   | RAC3    | IPI00023138 | hsa:29959 | NRBP1     | IPI00604756 | 2.145471 |
| hsa:5901   | RAN     | IPI00643041 | hsa:91754 | NEK9      | IPI00301609 | 2.145471 |
| hsa:4218   | RAB8A   | IPI00028481 | hsa:5871  | MAP4K2    | IPI00149094 | 2.145471 |
| hsa:5908   | RAP1B   | IPI00015148 | hsa:9020  | MAP3K14   | IPI00016099 | 2.145471 |
| hsa:10890  | RAB10   | IPI00016513 | hsa:6790  | AURKA     | IPI00298940 | 2.145471 |
| hsa:56681  | SAR1A   | IPI00015954 | hsa:9641  | IKBKE     | IPI00029045 | 2.145471 |
| hsa:51552  | RAB14   | IPI00291928 | hsa:9641  | IKBKE     | IPI00029045 | 2.145471 |
| hsa:7879   | RAB7A   | IPI00016342 | hsa:9641  | IKBKE     | IPI00029045 | 2.145471 |
| hsa:28512  | NKIRAS1 | IPI00410705 | hsa:7046  | TGFBR1    | IPI00005733 | 2.145471 |
| hsa:57381  | RHOJ    | IPI00027952 | hsa:7046  | TGFBR1    | IPI00005733 | 2.145471 |
| hsa:399    | RHOH    | IPI00018882 | hsa:7046  | TGFBR1    | IPI00005733 | 2.145471 |
| hsa:391    | RHOG    | IPI00017342 | hsa:7046  | TGFBR1    | IPI00005733 | 2.145471 |
| hsa:29984  | RHOD    | IPI00010841 | hsa:7046  | TGFBR1    | IPI00005733 | 2.145471 |
| hsa:387    | RHOA    | IPI00478231 | hsa:7046  | TGFBR1    | IPI00005733 | 2.145471 |
| hsa:121268 | RHEBL1  | IPI00556561 | hsa:7046  | TGFBR1    | IPI00005733 | 2.145471 |
| hsa:55207  | ARL8B   | IPI00018871 | hsa:7046  | TGFBR1    | IPI00005733 | 2.145471 |
| hsa:23551  | RASD2   | IPI00304150 | hsa:7046  | TGFBR1    | IPI00005733 | 2.145471 |
| hsa:5911   | RAP2A   | IPI00019346 | hsa:7046  | TGFBR1    | IPI00005733 | 2.145471 |
| hsa:5901   | RAN     | IPI00643041 | hsa:7046  | TGFBR1    | IPI00005733 | 2.145471 |
| hsa:51560  | RAB6B   | IPI00016891 | hsa:7046  | TGFBR1    | IPI00005733 | 2.145471 |
| hsa:5865   | RAB3B   | IPI00300562 | hsa:7046  | TGFBR1    | IPI00005733 | 2.145471 |
| hsa:23682  | RAB38   | IPI00027981 | hsa:7046  | TGFBR1    | IPI00005733 | 2.145471 |
| hsa:83871  | RAB34   | IPI00328180 | hsa:7046  | TGFBR1    | IPI00005733 | 2.145471 |
| hsa:83452  | RAB33B  | IPI00021475 | hsa:7046  | TGFBR1    | IPI00005733 | 2.145471 |
| hsa:5872   | RAB13   | IPI00016373 | hsa:7046  | TGFBR1    | IPI00005733 | 2.145471 |



|            |         |             |           |              |             |          |
|------------|---------|-------------|-----------|--------------|-------------|----------|
| hsa:379    | ARL4D   | IPI00027971 | hsa:7046  | TGFBR1       | IPI00005733 | 2.145471 |
| hsa:5879   | RAC1    | IPI00010271 | hsa:5610  | EIF2AK2      | IPI00019463 | 2.145471 |
| hsa:998    | CDC42   | IPI00007189 | hsa:5610  | EIF2AK2      | IPI00019463 | 2.145471 |
| hsa:998    | CDC42   | IPI00007189 | hsa:5599  | MAPK8        | IPI00024672 | 2.145471 |
| hsa:3265   | HRAS    | IPI00000006 | hsa:5599  | MAPK8        | IPI00024672 | 2.145471 |
| hsa:5867   | RAB4A   | IPI00480056 | hsa:5595  | MAPK3        | IPI00018195 | 2.145471 |
| hsa:378    | ARF4    | IPI00215918 | hsa:1956  | EGFR         | IPI00018274 | 2.145471 |
| hsa:22800  | RRAS2   | IPI00012512 | hsa:90    | ACVR1        | IPI00029219 | 2.145471 |
| hsa:57381  | RHOJ    | IPI00027952 | hsa:90    | ACVR1        | IPI00029219 | 2.145471 |
| hsa:29984  | RHOD    | IPI00010841 | hsa:90    | ACVR1        | IPI00029219 | 2.145471 |
| hsa:121268 | RHEBL1  | IPI00556561 | hsa:90    | ACVR1        | IPI00029219 | 2.145471 |
| hsa:23551  | RASD2   | IPI00304150 | hsa:90    | ACVR1        | IPI00029219 | 2.145471 |
| hsa:5911   | RAP2A   | IPI00019346 | hsa:90    | ACVR1        | IPI00029219 | 2.145471 |
| hsa:51560  | RAB6B   | IPI00016891 | hsa:90    | ACVR1        | IPI00029219 | 2.145471 |
| hsa:5865   | RAB3B   | IPI00300562 | hsa:90    | ACVR1        | IPI00029219 | 2.145471 |
| hsa:83452  | RAB33B  | IPI00021475 | hsa:90    | ACVR1        | IPI00029219 | 2.145471 |
| hsa:64284  | RAB17   | IPI00007866 | hsa:90    | ACVR1        | IPI00029219 | 2.145471 |
| hsa:4893   | NRAS    | IPI00000005 | hsa:90    | ACVR1        | IPI00029219 | 2.145471 |
| hsa:28512  | NKIRAS1 | IPI00410705 | hsa:90    | ACVR1        | IPI00029219 | 2.145471 |
| hsa:3265   | HRAS    | IPI00000006 | hsa:5604  | MAP2K1       | IPI00219604 | 2.145471 |
| hsa:5869   | RAB5B   | IPI00017344 | hsa:983   | CDC2         | IPI00073536 | 2.145471 |
| hsa:5867   | RAB4A   | IPI00480056 | hsa:983   | CDC2         | IPI00073536 | 2.145471 |
| hsa:6236   | RRAD    | IPI00375333 | hsa:5578  | PRKCA        | IPI00385449 | 2.145471 |
| hsa:387    | RHOA    | IPI00478231 | hsa:5578  | PRKCA        | IPI00385449 | 2.145471 |
| hsa:998    | CDC42   | IPI00007189 | hsa:5578  | PRKCA        | IPI00385449 | 2.145471 |
| hsa:6236   | RRAD    | IPI00375333 | hsa:5566  | PRKACA730418 | IPI00396630 | 2.145471 |
| hsa:5908   | RAP1B   | IPI00015148 | hsa:5566  | PRKACA730418 | IPI00396630 | 2.145471 |
| hsa:5906   | RAP1A   | IPI00019345 | hsa:5566  | PRKACA730418 | IPI00396630 | 2.145471 |
| hsa:387    | RHOA    | IPI00478231 | hsa:5566  | PRKACA730418 | IPI00396630 | 2.145471 |
| hsa:387    | RHOA    | IPI00478231 | hsa:5590  | PRKCCZ       | IPI00013749 | 2.145471 |
| hsa:3265   | HRAS    | IPI00000006 | hsa:5590  | PRKCCZ       | IPI00013749 | 2.145471 |
| hsa:998    | CDC42   | IPI00007189 | hsa:5590  | PRKCCZ       | IPI00013749 | 2.145471 |
| hsa:22800  | RRAS2   | IPI00012512 | hsa:658   | BMPR1B       | IPI00010862 | 2.145471 |
| hsa:57381  | RHOJ    | IPI00027952 | hsa:658   | BMPR1B       | IPI00010862 | 2.145471 |
| hsa:29984  | RHOD    | IPI00010841 | hsa:658   | BMPR1B       | IPI00010862 | 2.145471 |
| hsa:121268 | RHEBL1  | IPI00556561 | hsa:658   | BMPR1B       | IPI00010862 | 2.145471 |
| hsa:23551  | RASD2   | IPI00304150 | hsa:658   | BMPR1B       | IPI00010862 | 2.145471 |
| hsa:5911   | RAP2A   | IPI00019346 | hsa:658   | BMPR1B       | IPI00010862 | 2.145471 |
| hsa:5901   | RAN     | IPI00643041 | hsa:658   | BMPR1B       | IPI00010862 | 2.145471 |
| hsa:51560  | RAB6B   | IPI00016891 | hsa:658   | BMPR1B       | IPI00010862 | 2.145471 |
| hsa:23682  | RAB38   | IPI00027981 | hsa:658   | BMPR1B       | IPI00010862 | 2.145471 |
| hsa:28512  | NKIRAS1 | IPI00410705 | hsa:658   | BMPR1B       | IPI00010862 | 2.145471 |
| hsa:6237   | RRAS    | IPI00020418 | hsa:2048  | EPHB2        | IPI00021275 | 2.145471 |
| hsa:6236   | RRAD    | IPI00375333 | hsa:1457  | CSNK2A1      | IPI00744507 | 2.145471 |
| hsa:5911   | RAP2A   | IPI00019346 | hsa:9448  | MAP4K4       | IPI00006752 | 2.145471 |
| hsa:6236   | RRAD    | IPI00375333 | hsa:5579  | PRKCB1       | IPI00010466 | 2.145471 |
| hsa:998    | CDC42   | IPI00007189 | hsa:57787 | MARK4        | IPI00064797 | 2.145471 |
| hsa:6236   | RRAD    | IPI00375333 | hsa:818   | CAMK2G       | IPI00334344 | 2.145471 |
| hsa:3265   | HRAS    | IPI00000006 | hsa:3643  | INSR         | IPI00220325 | 2.145471 |
| hsa:998    | CDC42   | IPI00007189 | hsa:5582  | PRKCG        | IPI00007128 | 2.145471 |
| hsa:5906   | RAP1A   | IPI00019345 | hsa:4914  | NTRK1        | IPI00025076 | 2.145471 |
| hsa:5911   | RAP2A   | IPI00019346 | hsa:23043 | TNIK         | IPI00145805 | 2.145471 |
| hsa:23011  | RAB21   | IPI00007755 | hsa:9641  | IKBKE        | IPI00029045 | 2.145471 |
| hsa:389    | RHOC    | IPI00027434 | hsa:9641  | IKBKE        | IPI00029045 | 2.145471 |
| hsa:8766   | RAB11A  | IPI00429190 | hsa:9641  | IKBKE        | IPI00029045 | 2.145471 |
| hsa:5878   | RAB5C   | IPI00016339 | hsa:9641  | IKBKE        | IPI00029045 | 2.145471 |
| hsa:5868   | RAB5A   | IPI00023510 | hsa:9641  | IKBKE        | IPI00029045 | 2.145471 |
| hsa:5878   | RAB5C   | IPI00016339 | hsa:25778 | RIPK5        | IPI00465346 | 2.145471 |
| hsa:51552  | RAB14   | IPI00291928 | hsa:25778 | RIPK5        | IPI00465346 | 2.145471 |
| hsa:2242   | FES     | IPI00294344 | hsa:9564  | BCAR1        | IPI00872386 | 2.138698 |

|           |           |             |            |         |             |          |
|-----------|-----------|-------------|------------|---------|-------------|----------|
| hsa:5594  | MAPK1     | IPI00003479 | hsa:6654   | SOS1    | IPI00020131 | 2.138087 |
| hsa:1956  | EGFR      | IPI00018274 | hsa:6655   | SOS2    | IPI00020134 | 2.138087 |
| hsa:1956  | EGFR      | IPI00018274 | hsa:6654   | SOS1    | IPI00020131 | 2.138087 |
| hsa:2260  | FGFR1     | IPI00005142 | hsa:6654   | SOS1    | IPI00020131 | 2.138087 |
| hsa:1436  | CSF1R     | IPI00011218 | hsa:6654   | SOS1    | IPI00020131 | 2.138087 |
| hsa:2064  | ERBB2     | IPI00300384 | hsa:6654   | SOS1    | IPI00020131 | 2.138087 |
| hsa:5728  | PTEN      | IPI00012587 | hsa:1739   | DLG1    | IPI00030351 | 2.131258 |
| hsa:5793  | PTPRG     | IPI00011651 | hsa:1742   | DLG4    | IPI00619928 | 2.131258 |
| hsa:5784  | PTPN14    | IPI00018914 | hsa:7082   | TJP1    | IPI00216219 | 2.131258 |
| hsa:558   | AXL       | IPI00397361 | hsa:8440   | NCK2    | IPI00306531 | 2.129375 |
| hsa:558   | AXL       | IPI00397361 | hsa:5296   | PIK3R2  | IPI00011736 | 2.129375 |
| hsa:10461 | MERTK     | IPI00029756 | hsa:2885   | GRB2    | IPI00021327 | 2.129375 |
| hsa:558   | AXL       | IPI00397361 | hsa:2885   | GRB2    | IPI00021327 | 2.129375 |
| hsa:1856  | DVL2      | IPI00023103 | hsa:387    | RHOA    | IPI00478231 | 2.115234 |
| hsa:4842  | NOS1      | IPI00217225 | hsa:51655  | RASD1   | IPI00007111 | 2.115234 |
| hsa:22999 | RIMS1     | IPI00387015 | hsa:25837  | RAB26   | IPI00419883 | 2.115234 |
| hsa:22999 | RIMS1     | IPI00387015 | hsa:326624 | RAB37   | IPI00073180 | 2.115234 |
| hsa:22999 | RIMS1     | IPI00387015 | hsa:10890  | RAB10   | IPI00016513 | 2.115234 |
| hsa:22999 | RIMS1     | IPI00387015 | hsa:5873   | RAB27A  | IPI00016381 | 2.115234 |
| hsa:22999 | RIMS1     | IPI00387015 | hsa:5864   | RAB3A   | IPI00023504 | 2.115234 |
| hsa:9699  | RIMS2     | IPI00005698 | hsa:115827 | RAB3C   | IPI00061114 | 2.115234 |
| hsa:9699  | RIMS2     | IPI00005698 | hsa:9545   | RAB3D   | IPI00032808 | 2.115234 |
| hsa:9699  | RIMS2     | IPI00005698 | hsa:5873   | RAB27A  | IPI00016381 | 2.115234 |
| hsa:9699  | RIMS2     | IPI00005698 | hsa:5864   | RAB3A   | IPI00023504 | 2.115234 |
| hsa:9699  | RIMS2     | IPI00005698 | hsa:5865   | RAB3B   | IPI00300562 | 2.115234 |
| hsa:9699  | RIMS2     | IPI00005698 | hsa:4218   | RAB8A   | IPI00028481 | 2.115234 |
| hsa:56288 | PARD3     | IPI00154915 | hsa:998    | CDC42   | IPI00007189 | 2.115234 |
| hsa:9260  | PDLIM7    | IPI00023122 | hsa:2669   | GEM     | IPI00022710 | 2.115234 |
| hsa:84708 | LNX1      | IPI00152181 | hsa:373    | TRIM23  | IPI00003328 | 2.115234 |
| hsa:1855  | DVL1      | IPI00023100 | hsa:5879   | RAC1    | IPI00010271 | 2.115234 |
| hsa:1856  | DVL2      | IPI00023103 | hsa:5879   | RAC1    | IPI00010271 | 2.115234 |
| hsa:6386  | SDCBP     | IPI00299086 | hsa:5868   | RAB5A   | IPI00023510 | 2.115234 |
| hsa:9463  | PICK1     | IPI00160369 | hsa:377    | ARF3    | IPI00215917 | 2.115234 |
| hsa:9463  | PICK1     | IPI00160369 | hsa:375    | ARF1    | IPI00215914 | 2.115234 |
| hsa:57120 | GOPC      | IPI00186721 | hsa:23433  | RHOQ    | IPI00012511 | 2.115234 |
| hsa:84953 | MICALCL   | IPI00844523 | hsa:81876  | RAB1B   | IPI00008964 | 2.115234 |
| hsa:9260  | PDLIM7    | IPI00023122 | hsa:2669   | GEM     | IPI00022710 | 2.115234 |
| hsa:25    | ABL129892 | IPI00216969 | hsa:9051   | PSTPIP1 | IPI00022606 | 2.10807  |
| hsa:4811  | NID1      | IPI00026944 | hsa:5328   | PLAU    | IPI00296180 | 2.102428 |
| hsa:7057  | THBS1     | IPI00296099 | hsa:5340   | PLG     | IPI00019580 | 2.102428 |
| hsa:7057  | THBS1     | IPI00296099 | hsa:2147   | F2      | IPI00019568 | 2.102428 |
| hsa:60312 | AFAP1     | IPI00444138 | hsa:5582   | PRKCG   | IPI00007128 | 2.08973  |
| hsa:60312 | AFAP1     | IPI00444138 | hsa:5578   | PRKCA   | IPI00385449 | 2.08973  |
| hsa:60312 | AFAP1     | IPI00444138 | hsa:5579   | PRKCB1  | IPI00010466 | 2.08973  |
| hsa:5338  | PLD2      | IPI00024727 | hsa:5578   | PRKCA   | IPI00385449 | 2.08973  |
| hsa:5337  | PLD1      | IPI00012865 | hsa:5578   | PRKCA   | IPI00385449 | 2.08973  |
| hsa:3667  | IRS1      | IPI00019471 | hsa:5582   | PRKCG   | IPI00007128 | 2.08973  |
| hsa:9266  | PSCD2     | IPI00015228 | hsa:5582   | PRKCG   | IPI00007128 | 2.08973  |
| hsa:9266  | PSCD2     | IPI00015228 | hsa:5579   | PRKCB1  | IPI00010466 | 2.08973  |
| hsa:60312 | AFAP1     | IPI00444138 | hsa:5581   | PRKCE   | IPI00024539 | 2.08973  |
| hsa:11033 | CENTA1    | IPI00009992 | hsa:5581   | PRKCE   | IPI00024539 | 2.08973  |
| hsa:5337  | PLD1      | IPI00012865 | hsa:5585   | PKN1    | IPI00002803 | 2.08973  |
| hsa:8527  | DGKD      | IPI00303136 | hsa:5578   | PRKCA   | IPI00385449 | 2.08973  |
| hsa:9266  | PSCD2     | IPI00015228 | hsa:5578   | PRKCA   | IPI00385449 | 2.08973  |
| hsa:1759  | DNM1      | IPI00873844 | hsa:5578   | PRKCA   | IPI00385449 | 2.08973  |
| hsa:11033 | CENTA1    | IPI00009992 | hsa:5578   | PRKCA   | IPI00385449 | 2.08973  |
| hsa:634   | CEACAM1   | IPI00009938 | hsa:3643   | INSR    | IPI00220325 | 2.077719 |
| hsa:1432  | MAPK14    | IPI00002857 | hsa:6775   | STAT4   | IPI00000106 | 2.071011 |
| hsa:1432  | MAPK14    | IPI00002857 | hsa:6772   | STAT1   | IPI00030781 | 2.071011 |
| hsa:7046  | TGFBR1    | IPI00005733 | hsa:1123   | CHN1    | IPI00013488 | 2.071011 |

|          |         |             |            |              |             |          |
|----------|---------|-------------|------------|--------------|-------------|----------|
| hsa:7046 | TGFBR1  | IPI00005733 | hsa:9306   | SOCS6        | IPI00297351 | 2.071011 |
| hsa:7046 | TGFBR1  | IPI00005733 | hsa:5295   | PIK3R1       | IPI00021448 | 2.071011 |
| hsa:7048 | TGFBR2  | IPI00020431 | hsa:5295   | PIK3R1       | IPI00021448 | 2.071011 |
| hsa:3716 | JAK1    | IPI00443765 | hsa:3635   | INPP5D646743 | IPI00329213 | 2.071011 |
| hsa:3716 | JAK1    | IPI00443765 | hsa:9021   | SOCS3        | IPI00297349 | 2.071011 |
| hsa:3716 | JAK1    | IPI00443765 | hsa:8651   | SOCS1        | IPI00021491 | 2.071011 |
| hsa:3716 | JAK1    | IPI00443765 | hsa:6461   | SHB          | IPI00604688 | 2.071011 |
| hsa:3716 | JAK1    | IPI00443765 | hsa:5295   | PIK3R1       | IPI00021448 | 2.071011 |
| hsa:3717 | JAK2    | IPI00031016 | hsa:9021   | SOCS3        | IPI00297349 | 2.071011 |
| hsa:3717 | JAK2    | IPI00031016 | hsa:8651   | SOCS1        | IPI00021491 | 2.071011 |
| hsa:3717 | JAK2    | IPI00031016 | hsa:5295   | PIK3R1       | IPI00021448 | 2.071011 |
| hsa:5979 | RET     | IPI00013983 | hsa:53358  | SHC3         | IPI00409679 | 2.071011 |
| hsa:5979 | RET     | IPI00013983 | hsa:6464   | SHC1         | IPI00645103 | 2.071011 |
| hsa:5979 | RET     | IPI00013983 | hsa:5295   | PIK3R1       | IPI00021448 | 2.071011 |
| hsa:4233 | MET     | IPI00029273 | hsa:5295   | PIK3R1       | IPI00021448 | 2.071011 |
| hsa:4233 | MET     | IPI00029273 | hsa:3636   | INPPL1       | IPI00016932 | 2.071011 |
| hsa:4233 | MET     | IPI00029273 | hsa:3635   | INPP5D646743 | IPI00329213 | 2.071011 |
| hsa:4233 | MET     | IPI00029273 | hsa:6464   | SHC1         | IPI00645103 | 2.071011 |
| hsa:5610 | EIF2AK2 | IPI00019463 | hsa:6772   | STAT1        | IPI00030781 | 2.071011 |
| hsa:5594 | MAPK1   | IPI00003479 | hsa:10044  | SH2D3C       | IPI00171093 | 2.071011 |
| hsa:5594 | MAPK1   | IPI00003479 | hsa:6777   | STAT5B       | IPI00103415 | 2.071011 |
| hsa:5594 | MAPK1   | IPI00003479 | hsa:6776   | STAT5A       | IPI00030783 | 2.071011 |
| hsa:5594 | MAPK1   | IPI00003479 | hsa:6464   | SHC1         | IPI00645103 | 2.071011 |
| hsa:2242 | FES     | IPI00294344 | hsa:84941  | HSH2D        | IPI00657885 | 2.071011 |
| hsa:2242 | FES     | IPI00294344 | hsa:5295   | PIK3R1       | IPI00021448 | 2.071011 |
| hsa:6850 | SYK     | IPI00018597 | hsa:5295   | PIK3R1       | IPI00021448 | 2.071011 |
| hsa:6850 | SYK     | IPI00018597 | hsa:29760  | BLNK         | IPI00002434 | 2.071011 |
| hsa:6850 | SYK     | IPI00018597 | hsa:3937   | LCP2         | IPI00297169 | 2.071011 |
| hsa:3718 | JAK3    | IPI00002773 | hsa:3635   | INPP5D646743 | IPI00329213 | 2.071011 |
| hsa:3718 | JAK3    | IPI00002773 | hsa:9021   | SOCS3        | IPI00297349 | 2.071011 |
| hsa:3718 | JAK3    | IPI00002773 | hsa:5295   | PIK3R1       | IPI00021448 | 2.071011 |
| hsa:3718 | JAK3    | IPI00002773 | hsa:8651   | SOCS1        | IPI00021491 | 2.071011 |
| hsa:3718 | JAK3    | IPI00002773 | hsa:6461   | SHB          | IPI00604688 | 2.071011 |
| hsa:5599 | MAPK8   | IPI00024672 | hsa:5295   | PIK3R1       | IPI00021448 | 2.071011 |
| hsa:5595 | MAPK3   | IPI00018195 | hsa:6776   | STAT5A       | IPI00030783 | 2.071011 |
| hsa:1956 | EGFR    | IPI00018274 | hsa:53358  | SHC3         | IPI00409679 | 2.071011 |
| hsa:1956 | EGFR    | IPI00018274 | hsa:10045  | SH2D3A       | IPI00305020 | 2.071011 |
| hsa:1956 | EGFR    | IPI00018274 | hsa:6777   | STAT5B       | IPI00103415 | 2.071011 |
| hsa:1956 | EGFR    | IPI00018274 | hsa:9021   | SOCS3        | IPI00297349 | 2.071011 |
| hsa:1956 | EGFR    | IPI00018274 | hsa:8651   | SOCS1        | IPI00021491 | 2.071011 |
| hsa:1956 | EGFR    | IPI00018274 | hsa:6776   | STAT5A       | IPI00030783 | 2.071011 |
| hsa:1956 | EGFR    | IPI00018274 | hsa:3636   | INPPL1       | IPI00016932 | 2.071011 |
| hsa:1956 | EGFR    | IPI00018274 | hsa:6464   | SHC1         | IPI00645103 | 2.071011 |
| hsa:1956 | EGFR    | IPI00018274 | hsa:5295   | PIK3R1       | IPI00021448 | 2.071011 |
| hsa:1020 | CDK5    | IPI00023530 | hsa:1123   | CHN1         | IPI00013488 | 2.071011 |
| hsa:90   | ACVR1   | IPI00029219 | hsa:9306   | SOCS6        | IPI00297351 | 2.071011 |
| hsa:90   | ACVR1   | IPI00029219 | hsa:1123   | CHN1         | IPI00013488 | 2.071011 |
| hsa:658  | BMPR1B  | IPI00010862 | hsa:1123   | CHN1         | IPI00013488 | 2.071011 |
| hsa:658  | BMPR1B  | IPI00010862 | hsa:9306   | SOCS6        | IPI00297351 | 2.071011 |
| hsa:2066 | ERBB4   | IPI00016371 | hsa:6776   | STAT5A       | IPI00030783 | 2.071011 |
| hsa:4914 | NTRK1   | IPI00025076 | hsa:25759  | SHC2         | IPI00786975 | 2.071011 |
| hsa:2064 | ERBB2   | IPI00300384 | hsa:8503   | PIK3R3       | IPI00513745 | 2.071011 |
| hsa:2064 | ERBB2   | IPI00300384 | hsa:116449 | MIST         | IPI00185667 | 2.071011 |
| hsa:2064 | ERBB2   | IPI00300384 | hsa:117157 | SH2D1B       | IPI00023755 | 2.071011 |
| hsa:2064 | ERBB2   | IPI00300384 | hsa:25759  | SHC2         | IPI00786975 | 2.071011 |
| hsa:2064 | ERBB2   | IPI00300384 | hsa:6830   | SUPT6H       | IPI00784161 | 2.071011 |
| hsa:2064 | ERBB2   | IPI00300384 | hsa:1154   | CISH         | IPI00017281 | 2.071011 |
| hsa:2064 | ERBB2   | IPI00300384 | hsa:1123   | CHN1         | IPI00013488 | 2.071011 |
| hsa:2064 | ERBB2   | IPI00300384 | hsa:29760  | BLNK         | IPI00002434 | 2.071011 |
| hsa:2064 | ERBB2   | IPI00300384 | hsa:8412   | BCAR3        | IPI00179053 | 2.071011 |

|           |          |             |            |        |             |          |
|-----------|----------|-------------|------------|--------|-------------|----------|
| hsa:2064  | ERBB2    | IPI00300384 | hsa:6774   | STAT3  | IPI00784414 | 2.071011 |
| hsa:2064  | ERBB2    | IPI00300384 | hsa:6772   | STAT1  | IPI00030781 | 2.071011 |
| hsa:2064  | ERBB2    | IPI00300384 | hsa:8651   | SOCS1  | IPI00021491 | 2.071011 |
| hsa:2064  | ERBB2    | IPI00300384 | hsa:53358  | SHC3   | IPI00409679 | 2.071011 |
| hsa:2064  | ERBB2    | IPI00300384 | hsa:9047   | SH2D2A | IPI00099806 | 2.071011 |
| hsa:2064  | ERBB2    | IPI00300384 | hsa:9610   | RIN1   | IPI00014454 | 2.071011 |
| hsa:2066  | ERBB4    | IPI00016371 | hsa:6464   | SHC1   | IPI00645103 | 2.071011 |
| hsa:4914  | NTRK1    | IPI00025076 | hsa:4068   | SH2D1A | IPI00032401 | 2.071011 |
| hsa:6885  | MAP3K7   | IPI00295738 | hsa:6774   | STAT3  | IPI00784414 | 2.071011 |
| hsa:1956  | EGFR     | IPI00018274 | hsa:6774   | STAT3  | IPI00784414 | 2.071011 |
| hsa:3654  | IRAK1    | IPI00293652 | hsa:6774   | STAT3  | IPI00784414 | 2.071011 |
| hsa:51701 | NLK      | IPI00008237 | hsa:6774   | STAT3  | IPI00784414 | 2.071011 |
| hsa:5595  | MAPK3    | IPI00018195 | hsa:6774   | STAT3  | IPI00784414 | 2.071011 |
| hsa:5599  | MAPK8    | IPI00024672 | hsa:6774   | STAT3  | IPI00784414 | 2.071011 |
| hsa:5594  | MAPK1    | IPI00003479 | hsa:6774   | STAT3  | IPI00784414 | 2.071011 |
| hsa:5610  | EIF2AK2  | IPI00019463 | hsa:6774   | STAT3  | IPI00784414 | 2.071011 |
| hsa:4233  | MET      | IPI00029273 | hsa:6774   | STAT3  | IPI00784414 | 2.071011 |
| hsa:5979  | RET      | IPI00013983 | hsa:6774   | STAT3  | IPI00784414 | 2.071011 |
| hsa:4486  | MST1R    | IPI00030273 | hsa:3717   | JAK2   | IPI00031016 | 2.071011 |
| hsa:5595  | MAPK3    | IPI00018195 | hsa:6850   | SYK    | IPI00018597 | 2.071011 |
| hsa:817   | CAMK2D   | IPI00430291 | hsa:6772   | STAT1  | IPI00030781 | 2.071011 |
| hsa:818   | CAMK2G   | IPI00334344 | hsa:6772   | STAT1  | IPI00030781 | 2.071011 |
| hsa:1956  | EGFR     | IPI00018274 | hsa:6772   | STAT1  | IPI00030781 | 2.071011 |
| hsa:9261  | MAPKAPK2 | IPI00026054 | hsa:6464   | SHC1   | IPI00645103 | 2.071011 |
| hsa:4914  | NTRK1    | IPI00025076 | hsa:6464   | SHC1   | IPI00645103 | 2.071011 |
| hsa:780   | DDR1     | IPI00001477 | hsa:6464   | SHC1   | IPI00645103 | 2.071011 |
| hsa:11184 | MAP4K1   | IPI00020258 | hsa:6464   | SHC1   | IPI00645103 | 2.071011 |
| hsa:4486  | MST1R    | IPI00030273 | hsa:6464   | SHC1   | IPI00645103 | 2.071011 |
| hsa:4921  | DDR2     | IPI00004409 | hsa:6464   | SHC1   | IPI00645103 | 2.071011 |
| hsa:4058  | LTK      | IPI00021365 | hsa:6464   | SHC1   | IPI00645103 | 2.071011 |
| hsa:2064  | ERBB2    | IPI00300384 | hsa:6464   | SHC1   | IPI00645103 | 2.071011 |
| hsa:238   | ALK      | IPI00395632 | hsa:6464   | SHC1   | IPI00645103 | 2.071011 |
| hsa:4914  | NTRK1    | IPI00025076 | hsa:53358  | SHC3   | IPI00409679 | 2.071011 |
| hsa:238   | ALK      | IPI00395632 | hsa:53358  | SHC3   | IPI00409679 | 2.071011 |
| hsa:4914  | NTRK1    | IPI00025076 | hsa:5295   | PIK3R1 | IPI00021448 | 2.071011 |
| hsa:4486  | MST1R    | IPI00030273 | hsa:5295   | PIK3R1 | IPI00021448 | 2.071011 |
| hsa:7297  | TYK2     | IPI00022353 | hsa:5295   | PIK3R1 | IPI00021448 | 2.071011 |
| hsa:2064  | ERBB2    | IPI00300384 | hsa:5295   | PIK3R1 | IPI00021448 | 2.071011 |
| hsa:11184 | MAP4K1   | IPI00020258 | hsa:29760  | BLNK   | IPI00002434 | 2.071011 |
| hsa:1454  | CSNK1E   | IPI00027729 | hsa:9021   | SOCS3  | IPI00297349 | 2.071011 |
| hsa:7535  | ZAP70    | IPI00329789 | hsa:6461   | SHB    | IPI00604688 | 2.071011 |
| hsa:11184 | MAP4K1   | IPI00020258 | hsa:3937   | LCP2   | IPI00297169 | 2.071011 |
| hsa:7535  | ZAP70    | IPI00329789 | hsa:3937   | LCP2   | IPI00297169 | 2.071011 |
| hsa:11040 | PIM2     | IPI00332692 | hsa:8651   | SOCS1  | IPI00021491 | 2.071011 |
| hsa:5608  | MAP2K6   | IPI00003814 | hsa:6775   | STAT4  | IPI00000106 | 2.071011 |
| hsa:1956  | EGFR     | IPI00018274 | hsa:1154   | CISH   | IPI00017281 | 2.071011 |
| hsa:1956  | EGFR     | IPI00018274 | hsa:84951  | TNS4   | IPI00170752 | 2.071011 |
| hsa:1956  | EGFR     | IPI00018274 | hsa:25759  | SHC2   | IPI00786975 | 2.071011 |
| hsa:1956  | EGFR     | IPI00018274 | hsa:116449 | MIST   | IPI00185667 | 2.071011 |
| hsa:1956  | EGFR     | IPI00018274 | hsa:8503   | PIK3R3 | IPI00513745 | 2.071011 |
| hsa:1956  | EGFR     | IPI00018274 | hsa:4068   | SH2D1A | IPI00032401 | 2.071011 |
| hsa:1956  | EGFR     | IPI00018274 | hsa:9047   | SH2D2A | IPI00099806 | 2.071011 |
| hsa:2066  | ERBB4    | IPI00016371 | hsa:6777   | STAT5B | IPI00103415 | 2.071011 |
| hsa:6464  | SHC1     | IPI00645103 | hsa:5296   | PIK3R2 | IPI00011736 | 2.060054 |
| hsa:5747  | PTK2     | IPI00012885 | hsa:8440   | NCK2   | IPI00306531 | 2.044165 |
| hsa:5747  | PTK2     | IPI00012885 | hsa:1398   | CRK    | IPI00004838 | 2.044165 |
| hsa:5747  | PTK2     | IPI00012885 | hsa:4067   | LYN    | IPI00298625 | 2.044165 |
| hsa:5747  | PTK2     | IPI00012885 | hsa:2268   | FGR    | IPI00016871 | 2.044165 |
| hsa:5747  | PTK2     | IPI00012885 | hsa:1445   | CSK    | IPI00013212 | 2.044165 |
| hsa:5747  | PTK2     | IPI00012885 | hsa:2534   | FYN    | IPI00219012 | 2.044165 |

|          |       |             |          |       |             |          |
|----------|-------|-------------|----------|-------|-------------|----------|
| hsa:5747 | PTK2  | IPI00012885 | hsa:2885 | GRB2  | IPI00021327 | 2.044165 |
| hsa:2185 | PTK2B | IPI00029702 | hsa:4145 | MATK  | IPI00000868 | 2.044165 |
| hsa:5747 | PTK2  | IPI00012885 | hsa:3932 | LCK   | IPI00394952 | 2.044165 |
| hsa:2185 | PTK2B | IPI00029702 | hsa:3932 | LCK   | IPI00394952 | 2.044165 |
| hsa:2185 | PTK2B | IPI00029702 | hsa:6714 | SRC   | IPI00641230 | 2.044165 |
| hsa:5747 | PTK2  | IPI00012885 | hsa:6714 | SRC   | IPI00641230 | 2.044165 |
| hsa:2185 | PTK2B | IPI00029702 | hsa:4067 | LYN   | IPI00298625 | 2.044165 |
| hsa:2185 | PTK2B | IPI00029702 | hsa:2534 | FYN   | IPI00219012 | 2.044165 |
| hsa:2185 | PTK2B | IPI00029702 | hsa:2885 | GRB2  | IPI00021327 | 2.044165 |
| hsa:2185 | PTK2B | IPI00029702 | hsa:1398 | CRK   | IPI00004838 | 2.044165 |
| hsa:3572 | IL6ST | IPI00297124 | hsa:2064 | ERBB2 | IPI00300384 | 2.019617 |
