# Supplementary material
Source: PubMed Central journal article supplement (PMC2742434)
Supplement: M800354-MCP200_3.pdf [file M800354-MCP200_3.pdf]

| KEGG ID A | Protein Name | Subcellular location | KEGG ID B | Protein Name | Subcellular location | PIDS     |
|-----------|--------------|----------------------|-----------|--------------|----------------------|----------|
| hsa:56998 | CTNNBIP1     | nucleus              | hsa:3728  | JUP          | cytoplasm            | 207.2929 |
| hsa:56998 | CTNNBIP1     | nucleus              | hsa:3728  | JUP          | cytoplasm            | 207.2929 |
| hsa:8996  | NOL3         | nucleus              | hsa:835   | CASP2        | cytoplasm            | 173.3722 |
| hsa:8996  | NOL3         | nucleus              | hsa:841   | CASP8        | cytoplasm            | 173.3722 |
| hsa:11156 | PTP4A3       | nucleus              | hsa:55898 | UNC45A       | cytoplasm            | 125.6321 |
| hsa:11156 | PTP4A3       | nucleus              | hsa:10985 | GCN1L1       | cytoplasm            | 125.6321 |
| hsa:11156 | PTP4A3       | nucleus              | hsa:55027 | HEATR3       | cytoplasm            | 125.6321 |
| hsa:8915  | BCL10        | cytoplasm            | hsa:10892 | MALT1        | extracellular        | 102.2818 |
| hsa:1500  | CTNND1       | cytoplasm            | hsa:64403 | CDH24        | extracellular        | 77.73484 |
| hsa:1500  | CTNND1       | cytoplasm            | hsa:1003  | CDH5         | extracellular        | 77.73484 |
| hsa:1500  | CTNND1       | cytoplasm            | hsa:999   | CDH1         | extracellular        | 77.73484 |
| hsa:1500  | CTNND1       | cytoplasm            | hsa:1001  | CDH3         | extracellular        | 77.73484 |
| hsa:8502  | PKP4         | cytoplasm            | hsa:1003  | CDH5         | extracellular        | 77.73484 |
| hsa:8502  | PKP4         | cytoplasm            | hsa:1825  | DSC3         | extracellular        | 77.73484 |
| hsa:1501  | CTNND2       | cytoplasm            | hsa:1000  | CDH2         | extracellular        | 77.73484 |
| hsa:3728  | JUP          | cytoplasm            | hsa:1830  | DSG3         | extracellular        | 77.73484 |
| hsa:3728  | JUP          | cytoplasm            | hsa:1829  | DSG2         | extracellular        | 77.73484 |
| hsa:3728  | JUP          | cytoplasm            | hsa:1824  | DSC2         | extracellular        | 77.73484 |
| hsa:3728  | JUP          | cytoplasm            | hsa:1823  | DSC1         | extracellular        | 77.73484 |
| hsa:1501  | CTNND2       | cytoplasm            | hsa:999   | CDH1         | extracellular        | 77.73484 |
| hsa:1434  | CSE1L        | cytoplasm            | hsa:999   | CDH1         | extracellular        | 77.73484 |
| hsa:7874  | USP7         | nucleus              | hsa:10346 | TRIM22       | cytoplasm            | 72.10188 |
| hsa:7874  | USP7         | nucleus              | hsa:7187  | TRAF3        | cytoplasm            | 72.10188 |
| hsa:7874  | USP7         | nucleus              | hsa:7186  | TRAF2        | cytoplasm            | 72.10188 |
| hsa:7874  | USP7         | nucleus              | hsa:7189  | TRAF6        | cytoplasm            | 72.10188 |
| hsa:7874  | USP7         | nucleus              | hsa:7188  | TRAF5        | cytoplasm            | 72.10188 |
| hsa:8161  | COIL         | nucleus              | hsa:3839  | KPNA3        | cytoplasm            | 64.49113 |
| hsa:9391  | CIAO1        | nucleus              | hsa:54919 | HEATR2       | cytoplasm            | 64.49113 |
| hsa:6001  | RGS10        | nucleus              | hsa:2770  | GNAI1        | cytoplasm            | 63.78243 |
| hsa:6002  | RGS12        | nucleus              | hsa:2770  | GNAI1        | cytoplasm            | 63.78243 |
| hsa:6001  | RGS10        | nucleus              | hsa:2781  | GNAZ         | cytoplasm            | 63.78243 |
| hsa:6002  | RGS12        | nucleus              | hsa:2771  | GNAI2        | cytoplasm            | 63.78243 |
| hsa:6001  | RGS10        | nucleus              | hsa:2773  | GNAI3        | cytoplasm            | 63.78243 |
| hsa:6002  | RGS12        | nucleus              | hsa:2773  | GNAI3        | cytoplasm            | 63.78243 |
| hsa:3728  | JUP          | cytoplasm            | hsa:1003  | CDH5         | extracellular        | 63.3395  |
| hsa:3728  | JUP          | cytoplasm            | hsa:1825  | DSC3         | extracellular        | 63.3395  |
| hsa:3728  | JUP          | cytoplasm            | hsa:1828  | DSG1         | extracellular        | 63.3395  |
| hsa:3728  | JUP          | cytoplasm            | hsa:1000  | CDH2         | extracellular        | 63.3395  |
| hsa:421   | ARVCF        | cytoplasm            | hsa:1000  | CDH2         | extracellular        | 63.3395  |
| hsa:421   | ARVCF        | cytoplasm            | hsa:999   | CDH1         | extracellular        | 63.3395  |
| hsa:3728  | JUP          | cytoplasm            | hsa:999   | CDH1         | extracellular        | 63.3395  |
| hsa:421   | ARVCF        | cytoplasm            | hsa:1013  | CDH15        | extracellular        | 63.3395  |
| hsa:3728  | JUP          | cytoplasm            | hsa:1013  | CDH15        | extracellular        | 63.3395  |
| hsa:56893 | UBQLN4       | nucleus              | hsa:4867  | NPHP1        | cytoplasm            | 39.48436 |
| hsa:56893 | UBQLN4       | nucleus              | hsa:10254 | STAM2        | cytoplasm            | 39.48436 |
| hsa:8996  | NOL3         | nucleus              | hsa:8772  | FADD         | cytoplasm            | 31.19141 |

|            |           |                 |            |              |                 |          |
|------------|-----------|-----------------|------------|--------------|-----------------|----------|
| hsa:317    | APAF1     | cytoplasm       | hsa:355    | FAS          | extracellular   | 31.19141 |
| hsa:8915   | BCL10     | cytoplasm       | hsa:8797   | TNFRSF10A    | extracellular   | 31.19141 |
| hsa:9771   | RAPGEF5   | nucleus         | hsa:5906   | RAP1A        | cytoplasm       | 28.89253 |
| hsa:9771   | RAPGEF5   | nucleus         | hsa:22808  | MRAS         | cytoplasm       | 28.89253 |
| hsa:9771   | RAPGEF5   | nucleus         | hsa:5911   | RAP2A        | cytoplasm       | 28.89253 |
| hsa:9771   | RAPGEF5   | nucleus         | hsa:5912   | RAP2B        | cytoplasm       | 28.89253 |
| hsa:5931   | RBBP7     | nucleus         | hsa:7189   | TRAF6        | cytoplasm       | 27.63905 |
| hsa:9184   | BUB3      | nucleus         | hsa:7189   | TRAF6        | cytoplasm       | 27.63905 |
| hsa:8379   | MAD1L1    | nucleus         | hsa:22981  | RP4-691N24.1 | cytoplasm       | 26.32291 |
| hsa:8379   | MAD1L1    | nucleus         | hsa:22981  | KIAA0980     | cytoplasm       | 26.32291 |
| hsa:114609 | TIRAP     | cytoplasm       | hsa:4615   | MYD88        | plasma membrane | 26.20945 |
| hsa:7097   | TLR2      | plasma membrane | hsa:148022 | TICAM1       | extracellular   | 24.67773 |
| hsa:7098   | TLR3      | plasma membrane | hsa:148022 | TICAM1       | extracellular   | 24.67773 |
| hsa:1107   | CHD3      | nucleus         | hsa:7341   | SUMO1        | cytoplasm       | 24.03396 |
| hsa:5371   | PML       | nucleus         | hsa:7341   | SUMO1        | cytoplasm       | 24.03396 |
| hsa:8554   | PIAS1     | nucleus         | hsa:7341   | SUMO1        | cytoplasm       | 24.03396 |
| hsa:10210  | TOPORS    | nucleus         | hsa:7341   | SUMO1        | cytoplasm       | 24.03396 |
| hsa:8805   | TRIM24    | nucleus         | hsa:7341   | SUMO1        | cytoplasm       | 24.03396 |
| hsa:4193   | MDM2      | nucleus         | hsa:7341   | SUMO1        | cytoplasm       | 24.03396 |
| hsa:6477   | SIAH1     | nucleus         | hsa:573    | BAG1         | cytoplasm       | 24.03396 |
| hsa:55658  | RNF126    | cytoplasm       | hsa:7917   | BAT3         | extracellular   | 24.03396 |
| hsa:29959  | NRBP1     | cytoplasm       | hsa:55183  | RIF1         | extracellular   | 23.70637 |
| hsa:699    | BUB1      | nucleus         | hsa:324    | APC          | cytoplasm       | 23.70637 |
| hsa:29959  | NRBP      | cytoplasm       | hsa:55183  | RIF1         | extracellular   | 23.70637 |
| hsa:55198  | APPL2     | nucleus         | hsa:57403  | RAB22A       | cytoplasm       | 23.20714 |
| hsa:55198  | APPL2     | nucleus         | hsa:5868   | RAB5A        | cytoplasm       | 23.20714 |
| hsa:26060  | APPL1     | nucleus         | hsa:5868   | RAB5A        | cytoplasm       | 23.20714 |
| hsa:55198  | DIP13B    | nucleus         | hsa:57403  | RAB22A       | cytoplasm       | 23.20714 |
| hsa:84440  | RAB11FIP4 | cytoplasm       | hsa:9727   | RAB11FIP3    | extracellular   | 19.74218 |
| hsa:9627   | SNCAIP    | nucleus         | hsa:25897  | RNF19A       | cytoplasm       | 19.66415 |
| hsa:57498  | KIDINS220 | cytoplasm       | hsa:4804   | NGFR         | extracellular   | 19.66415 |
| hsa:7704   | ZBTB16    | nucleus         | hsa:7186   | TRAF2        | cytoplasm       | 19.52759 |
| hsa:7704   | ZBTB16    | nucleus         | hsa:7186   | TRAF2        | cytoplasm       | 19.52759 |
| hsa:84527  | ZNF559    | nucleus         | hsa:4188   | MDFI         | cytoplasm       | 19.52759 |
| hsa:699    | BUB1      | nucleus         | hsa:163    | AP2B1        | cytoplasm       | 18.46892 |
| hsa:11200  | CHEK2     | nucleus         | hsa:3838   | KPNA2        | cytoplasm       | 18.46892 |
| hsa:4193   | MDM2      | nucleus         | hsa:64219  | PJA1         | cytoplasm       | 18.02547 |
| hsa:2130   | EWSR1     | nucleus         | hsa:138065 | RNF183       | cytoplasm       | 18.02547 |
| hsa:2130   | EWSR1     | nucleus         | hsa:4591   | TRIM37       | cytoplasm       | 18.02547 |
| hsa:257397 | MAP3K7IP3 | nucleus         | hsa:7186   | TRAF2        | cytoplasm       | 18.02547 |
| hsa:54764  | ZRANB1    | nucleus         | hsa:7189   | TRAF6        | cytoplasm       | 18.02547 |
| hsa:257397 | MAP3K7IP3 | nucleus         | hsa:7189   | TRAF6        | cytoplasm       | 18.02547 |
| hsa:2130   | EWSR1     | nucleus         | hsa:138065 | RNF183       | cytoplasm       | 18.02547 |
| hsa:2130   | EWSR1     | nucleus         | hsa:4591   | TRIM37       | cytoplasm       | 18.02547 |
| hsa:388    | RHOB      | nucleus         | hsa:85415  | RHPN2        | cytoplasm       | 15.86425 |
| hsa:91653  | BOC       | plasma membrane | hsa:55183  | RIF1         | extracellular   | 15.72567 |
| hsa:91653  | BOC       | plasma membrane | hsa:55183  | RIF1         | extracellular   | 15.72567 |

|           |           |                 |           |          |                 |          |
|-----------|-----------|-----------------|-----------|----------|-----------------|----------|
| hsa:8767  | RIPK2     | cytoplasm       | hsa:7132  | TNFRSF1A | extracellular   | 15.5075  |
| hsa:54106 | TLR911344 | plasma membrane | hsa:59307 | SIGIRR   | extracellular   | 14.38116 |
| hsa:1025  | CDK9      | nucleus         | hsa:27148 | STK36    | cytoplasm       | 13.23146 |
| hsa:51366 | UBR5      | nucleus         | hsa:5594  | MAPK1    | cytoplasm       | 13.23146 |
| hsa:9020  | MAP3K14   | cytoplasm       | hsa:23223 | RRP12    | plasma membrane | 13.23146 |
| hsa:58500 | ZNF250    | nucleus         | hsa:373   | TRIM23   | cytoplasm       | 12.40631 |
| hsa:58500 | ZNF250    | nucleus         | hsa:373   | TRIM23   | cytoplasm       | 12.40631 |
| hsa:8878  | SQSTM1    | nucleus         | hsa:3932  | LCK      | cytoplasm       | 12.1726  |
| hsa:5788  | PTPRC     | cytoplasm       | hsa:919   | CD247    | extracellular   | 11.59681 |
| hsa:5774  | PTPN3     | cytoplasm       | hsa:919   | CD247    | extracellular   | 11.59681 |
| hsa:26191 | PTPN22    | cytoplasm       | hsa:919   | CD247    | extracellular   | 11.59681 |
| hsa:9618  | TRAF4     | nucleus         | hsa:4216  | MAP3K4   | cytoplasm       | 11.40974 |
| hsa:9618  | TRAF4     | nucleus         | hsa:6198  | RPS6KB1  | cytoplasm       | 11.40974 |
| hsa:8618  | CADPS     | nucleus         | hsa:1756  | DMD      | cytoplasm       | 9.476247 |
| hsa:1019  | CDK4      | cytoplasm       | hsa:7917  | BAT3     | extracellular   | 8.820974 |
| hsa:5610  | EIF2AK2   | nucleus         | hsa:1147  | CHUK     | cytoplasm       | 8.820974 |
| hsa:5610  | EIF2AK2   | nucleus         | hsa:3551  | IKBKB    | cytoplasm       | 8.820974 |
| hsa:5127  | PCTK1     | cytoplasm       | hsa:7917  | BAT3     | extracellular   | 8.820974 |
| hsa:57396 | CLK4      | nucleus         | hsa:59286 | UBL5     | cytoplasm       | 8.820974 |
| hsa:23097 | CDC2L6    | nucleus         | hsa:9821  | RB1CC1   | cytoplasm       | 8.820974 |
| hsa:10114 | HIPK3     | nucleus         | hsa:7341  | SUMO1    | cytoplasm       | 8.820974 |
| hsa:1019  | CDK4      | cytoplasm       | hsa:7917  | BAT3     | extracellular   | 8.820974 |
| hsa:8767  | RIPK2     | cytoplasm       | hsa:4804  | NGFR     | extracellular   | 8.612487 |
| hsa:26060 | APPL1     | nucleus         | hsa:5290  | PIK3CA   | cytoplasm       | 7.896872 |
| hsa:55914 | ERBB2IP   | cytoplasm       | hsa:3691  | ITGB4    | extracellular   | 7.691759 |
| hsa:8125  | ANP32A    | nucleus         | hsa:5788  | PTPRC    | cytoplasm       | 7.691759 |
| hsa:5777  | PTPN6     | cytoplasm       | hsa:919   | CD247    | extracellular   | 7.462293 |
| hsa:6196  | RPS6KA2   | nucleus         | hsa:9223  | MAGI1    | cytoplasm       | 6.895014 |
| hsa:2321  | FLT1      | cytoplasm       | hsa:8828  | NRP2     | extracellular   | 6.86211  |
| hsa:83593 | RASSF5    | nucleus         | hsa:5908  | RAP1B    | cytoplasm       | 6.768748 |
| hsa:83593 | RASSF5    | nucleus         | hsa:5906  | RAP1A    | cytoplasm       | 6.768748 |
| hsa:83593 | RASSF5    | nucleus         | hsa:5898  | RALA     | cytoplasm       | 6.768748 |
| hsa:9770  | RASSF2    | nucleus         | hsa:3265  | HRAS     | cytoplasm       | 6.768748 |
| hsa:83593 | RASSF5    | nucleus         | hsa:3265  | HRAS     | cytoplasm       | 6.768748 |
| hsa:11186 | RASSF1    | nucleus         | hsa:3265  | HRAS     | cytoplasm       | 6.768748 |
| hsa:9770  | RASSF2    | nucleus         | hsa:3845  | KRAS     | cytoplasm       | 6.768748 |
| hsa:83593 | RASSF5    | nucleus         | hsa:3845  | KRAS     | cytoplasm       | 6.768748 |
| hsa:83593 | RASSF5    | nucleus         | hsa:22800 | RRAS2    | cytoplasm       | 6.768748 |
| hsa:83593 | RASSF5    | nucleus         | hsa:6237  | RRAS     | cytoplasm       | 6.768748 |
| hsa:83593 | RASSF5    | nucleus         | hsa:22808 | MRAS     | cytoplasm       | 6.768748 |
| hsa:83593 | RASSF5    | nucleus         | hsa:4893  | NRAS     | cytoplasm       | 6.768748 |
| hsa:83593 | RASSF5    | nucleus         | hsa:5911  | RAP2A    | cytoplasm       | 6.768748 |
| hsa:8878  | SQSTM1    | nucleus         | hsa:8737  | RIPK1    | cytoplasm       | 6.248191 |
| hsa:8878  | SQSTM1    | nucleus         | hsa:3654  | IRAK1    | cytoplasm       | 6.248191 |
| hsa:8878  | SQSTM1    | nucleus         | hsa:7046  | TGFBR1   | cytoplasm       | 6.248191 |
| hsa:8878  | SQSTM1    | nucleus         | hsa:90    | ACVR1    | cytoplasm       | 6.248191 |
| hsa:8878  | SQSTM1    | nucleus         | hsa:5590  | PRKCZ    | cytoplasm       | 6.248191 |

|           |              |           |            |           |               |          |
|-----------|--------------|-----------|------------|-----------|---------------|----------|
| hsa:8878  | SQSTM1       | nucleus   | hsa:658    | BMPR1B    | cytoplasm     | 6.248191 |
| hsa:8878  | SQSTM1       | nucleus   | hsa:5584   | PRKCI     | cytoplasm     | 6.248191 |
| hsa:5595  | MAPK3        | nucleus   | hsa:5605   | MAP2K2    | cytoplasm     | 6.174682 |
| hsa:5595  | MAPK3        | nucleus   | hsa:5604   | MAP2K1    | cytoplasm     | 6.174682 |
| hsa:57761 | TRIB3        | nucleus   | hsa:5604   | MAP2K1    | cytoplasm     | 6.174682 |
| hsa:10221 | TRIB1        | nucleus   | hsa:5604   | MAP2K1    | cytoplasm     | 6.174682 |
| hsa:5595  | MAPK3        | nucleus   | hsa:23236  | PLCB1     | cytoplasm     | 5.439601 |
| hsa:7465  | WEE1         | nucleus   | hsa:57154  | SMURF1    | cytoplasm     | 5.439601 |
| hsa:53904 | MYO3A        | cytoplasm | hsa:145781 | Gcom1     | extracellular | 5.390596 |
| hsa:51765 | RP6-213H19.1 | cytoplasm | hsa:145781 | Gcom1     | extracellular | 5.390596 |
| hsa:11156 | PTP4A3       | nucleus   | hsa:1017   | CDK2      | cytoplasm     | 5.346045 |
| hsa:5371  | PML          | nucleus   | hsa:7048   | TGFBR2    | cytoplasm     | 5.177529 |
| hsa:5371  | PML          | nucleus   | hsa:7046   | TGFBR1    | cytoplasm     | 5.177529 |
| hsa:5371  | PML          | nucleus   | hsa:6790   | AURKA     | cytoplasm     | 5.177529 |
| hsa:5371  | PML          | nucleus   | hsa:1432   | MAPK14    | cytoplasm     | 5.177529 |
| hsa:672   | BRCA1        | nucleus   | hsa:4215   | MAP3K3    | cytoplasm     | 5.177529 |
| hsa:672   | BRCA1        | nucleus   | hsa:25     | ABL129892 | cytoplasm     | 5.177529 |
| hsa:672   | BRCA1        | nucleus   | hsa:207    | AKT1      | cytoplasm     | 5.177529 |
| hsa:672   | BRCA1        | nucleus   | hsa:3717   | JAK2      | cytoplasm     | 5.177529 |
| hsa:672   | BRCA1        | nucleus   | hsa:3716   | JAK1      | cytoplasm     | 5.177529 |
| hsa:672   | BRCA1        | nucleus   | hsa:1019   | CDK4      | cytoplasm     | 5.177529 |
| hsa:672   | BRCA1        | nucleus   | hsa:1017   | CDK2      | cytoplasm     | 5.177529 |
| hsa:672   | BRCA1        | nucleus   | hsa:1457   | CSNK2A1   | cytoplasm     | 5.177529 |
| hsa:4193  | MDM2         | nucleus   | hsa:3480   | IGF1R     | cytoplasm     | 5.177529 |
| hsa:4193  | MDM2         | nucleus   | hsa:25     | ABL129892 | cytoplasm     | 5.177529 |
| hsa:4193  | MDM2         | nucleus   | hsa:207    | AKT1      | cytoplasm     | 5.177529 |
| hsa:4194  | MDM4         | nucleus   | hsa:207    | AKT1      | cytoplasm     | 5.177529 |
| hsa:9169  | SFRS2IP      | nucleus   | hsa:6732   | SRPK1     | cytoplasm     | 5.177529 |
| hsa:1107  | CHD3         | nucleus   | hsa:25764  | HYPK      | cytoplasm     | 5.177529 |
| hsa:4194  | MDM4         | nucleus   | hsa:1452   | CSNK1A1   | cytoplasm     | 5.177529 |
| hsa:22823 | MTF2         | nucleus   | hsa:25865  | PRKD2     | cytoplasm     | 5.177529 |
| hsa:10155 | TRIM28       | nucleus   | hsa:5062   | PAK2      | cytoplasm     | 5.177529 |
| hsa:80306 | MED28        | nucleus   | hsa:3932   | LCK       | cytoplasm     | 5.177529 |
| hsa:672   | BRCA1        | nucleus   | hsa:6790   | AURKA     | cytoplasm     | 5.177529 |
| hsa:55120 | FANCL        | nucleus   | hsa:7046   | TGFBR1    | cytoplasm     | 5.177529 |
| hsa:64207 | C14orf4      | nucleus   | hsa:3055   | HCK       | cytoplasm     | 5.177529 |
| hsa:84676 | TRIM63       | nucleus   | hsa:7273   | TIN       | cytoplasm     | 5.177529 |
| hsa:8554  | PIAS1        | nucleus   | hsa:5747   | PTK2      | cytoplasm     | 5.177529 |
| hsa:55120 | FANCL        | nucleus   | hsa:90     | ACVR1     | cytoplasm     | 5.177529 |
| hsa:55120 | FANCL        | nucleus   | hsa:658    | BMPR1B    | cytoplasm     | 5.177529 |
| hsa:9616  | RNF7         | nucleus   | hsa:1457   | CSNK2A1   | cytoplasm     | 5.177529 |
| hsa:546   | ATRX         | nucleus   | hsa:4750   | NEK1      | cytoplasm     | 5.177529 |
| hsa:10475 | TRIM38       | nucleus   | hsa:8737   | RIPK1     | cytoplasm     | 5.177529 |
| hsa:54476 | RNF216       | nucleus   | hsa:8737   | RIPK1     | cytoplasm     | 5.177529 |
| hsa:51132 | RNF12        | nucleus   | hsa:3984   | LIMK1     | cytoplasm     | 5.177529 |
| hsa:4193  | MDM2         | nucleus   | hsa:156    | ADRBK1    | cytoplasm     | 5.177529 |
| hsa:10155 | TRIM28       | nucleus   | hsa:9641   | IKBKE     | cytoplasm     | 5.177529 |

|           |              |           |          |         |                 |          |
|-----------|--------------|-----------|----------|---------|-----------------|----------|
| hsa:5371  | PML          | nucleus   | hsa:1457 | CSNK2A1 | cytoplasm       | 5.177529 |
| hsa:5770  | PTPN1        | cytoplasm | hsa:4914 | NTRK1   | plasma membrane | 5.090737 |
| hsa:5581  | PRKCE        | cytoplasm | hsa:2915 | GRM5    | plasma membrane | 5.040557 |
| hsa:5581  | PRKCE        | cytoplasm | hsa:2906 | GRIN2D  | plasma membrane | 5.040557 |
| hsa:5580  | PRKCD        | cytoplasm | hsa:2915 | GRM5    | plasma membrane | 5.040557 |
| hsa:6714  | SRC          | cytoplasm | hsa:2903 | GRIN2A  | plasma membrane | 5.040557 |
| hsa:6714  | SRC          | cytoplasm | hsa:2904 | GRIN2B  | plasma membrane | 5.040557 |
| hsa:1020  | CDK5         | cytoplasm | hsa:2903 | GRIN2A  | plasma membrane | 5.040557 |
| hsa:25    | ABL129892    | cytoplasm | hsa:2906 | GRIN2D  | plasma membrane | 5.040557 |
| hsa:156   | ADRBK1       | cytoplasm | hsa:2911 | GRM1    | plasma membrane | 5.040557 |
| hsa:5578  | PRKCA        | cytoplasm | hsa:2915 | GRM5    | plasma membrane | 5.040557 |
| hsa:5578  | PRKCA        | cytoplasm | hsa:2911 | GRM1    | plasma membrane | 5.040557 |
| hsa:5578  | PRKCA        | cytoplasm | hsa:2891 | GRIA2   | plasma membrane | 5.040557 |
| hsa:5578  | PRKCA        | cytoplasm | hsa:2890 | GRIA1   | plasma membrane | 5.040557 |
| hsa:5578  | PRKCA        | cytoplasm | hsa:2893 | GRIA4   | plasma membrane | 5.040557 |
| hsa:4067  | LYN          | cytoplasm | hsa:2892 | GRIA3   | plasma membrane | 5.040557 |
| hsa:5566  | PRKACA730418 | cytoplasm | hsa:2893 | GRIA4   | plasma membrane | 5.040557 |
| hsa:5566  | PRKACA730418 | cytoplasm | hsa:2890 | GRIA1   | plasma membrane | 5.040557 |
| hsa:5590  | PRK CZ       | cytoplasm | hsa:2915 | GRM5    | plasma membrane | 5.040557 |
| hsa:5579  | PRKCB1       | cytoplasm | hsa:2915 | GRM5    | plasma membrane | 5.040557 |
| hsa:5579  | PRKCB1       | cytoplasm | hsa:2906 | GRIN2D  | plasma membrane | 5.040557 |
| hsa:818   | CAMK2G       | cytoplasm | hsa:2893 | GRIA4   | plasma membrane | 5.040557 |
| hsa:818   | CAMK2G       | cytoplasm | hsa:2890 | GRIA1   | plasma membrane | 5.040557 |
| hsa:5582  | PRKCG        | cytoplasm | hsa:2893 | GRIA4   | plasma membrane | 5.040557 |
| hsa:815   | CAMK2A       | cytoplasm | hsa:2893 | GRIA4   | plasma membrane | 5.040557 |
| hsa:2066  | ERBB4        | cytoplasm | hsa:2902 | GRIN1   | plasma membrane | 5.040557 |
| hsa:11113 | CIT          | cytoplasm | hsa:2902 | GRIN1   | plasma membrane | 5.040557 |
| hsa:815   | CAMK2A       | cytoplasm | hsa:2902 | GRIN1   | plasma membrane | 5.040557 |
| hsa:5605  | MAP2K2       | cytoplasm | hsa:2902 | GRIN1   | plasma membrane | 5.040557 |
| hsa:2048  | EPHB2        | cytoplasm | hsa:2902 | GRIN1   | plasma membrane | 5.040557 |
| hsa:2050  | EPHB4        | cytoplasm | hsa:2902 | GRIN1   | plasma membrane | 5.040557 |
| hsa:6197  | RPS6KA3      | cytoplasm | hsa:2902 | GRIN1   | plasma membrane | 5.040557 |
| hsa:5582  | PRKCG        | cytoplasm | hsa:2902 | GRIN1   | plasma membrane | 5.040557 |
| hsa:5581  | PRKCE        | cytoplasm | hsa:2902 | GRIN1   | plasma membrane | 5.040557 |
| hsa:5579  | PRKCB1       | cytoplasm | hsa:2902 | GRIN1   | plasma membrane | 5.040557 |
| hsa:8573  | CASK         | cytoplasm | hsa:2903 | GRIN2A  | plasma membrane | 5.040557 |
| hsa:816   | CAMK2B       | cytoplasm | hsa:2903 | GRIN2A  | plasma membrane | 5.040557 |
| hsa:815   | CAMK2A       | cytoplasm | hsa:2903 | GRIN2A  | plasma membrane | 5.040557 |
| hsa:2185  | PTK2B        | cytoplasm | hsa:2903 | GRIN2A  | plasma membrane | 5.040557 |
| hsa:5578  | PRKCA        | cytoplasm | hsa:2903 | GRIN2A  | plasma membrane | 5.040557 |
| hsa:2534  | FYN          | cytoplasm | hsa:2903 | GRIN2A  | plasma membrane | 5.040557 |
| hsa:815   | CAMK2A       | cytoplasm | hsa:2904 | GRIN2B  | plasma membrane | 5.040557 |
| hsa:816   | CAMK2B       | cytoplasm | hsa:2904 | GRIN2B  | plasma membrane | 5.040557 |
| hsa:818   | CAMK2G       | cytoplasm | hsa:2904 | GRIN2B  | plasma membrane | 5.040557 |
| hsa:817   | CAMK2D       | cytoplasm | hsa:2904 | GRIN2B  | plasma membrane | 5.040557 |
| hsa:2048  | EPHB2        | cytoplasm | hsa:2904 | GRIN2B  | plasma membrane | 5.040557 |
| hsa:5582  | PRKCG        | cytoplasm | hsa:2904 | GRIN2B  | plasma membrane | 5.040557 |

|            |          |           |           |        |                 |          |
|------------|----------|-----------|-----------|--------|-----------------|----------|
| hsa:5579   | PRKCB1   | cytoplasm | hsa:2904  | GRIN2B | plasma membrane | 5.040557 |
| hsa:5578   | PRKCA    | cytoplasm | hsa:2904  | GRIN2B | plasma membrane | 5.040557 |
| hsa:2534   | FYN      | cytoplasm | hsa:2904  | GRIN2B | plasma membrane | 5.040557 |
| hsa:5588   | PRKCQ    | cytoplasm | hsa:2915  | GRM5   | plasma membrane | 5.040557 |
| hsa:5582   | PRKCG    | cytoplasm | hsa:2915  | GRM5   | plasma membrane | 5.040557 |
| hsa:5562   | PRKAA1   | cytoplasm | hsa:2898  | GRIK2  | plasma membrane | 5.040557 |
| hsa:8573   | CASK     | cytoplasm | hsa:2898  | GRIK2  | plasma membrane | 5.040557 |
| hsa:11113  | CIT      | cytoplasm | hsa:2906  | GRIN2D | plasma membrane | 5.040557 |
| hsa:5605   | MAP2K2   | cytoplasm | hsa:2906  | GRIN2D | plasma membrane | 5.040557 |
| hsa:6197   | RPS6KA3  | cytoplasm | hsa:2906  | GRIN2D | plasma membrane | 5.040557 |
| hsa:5582   | PRKCG    | cytoplasm | hsa:2906  | GRIN2D | plasma membrane | 5.040557 |
| hsa:6196   | RPS6KA2  | nucleus   | hsa:673   | BRAF   | cytoplasm       | 4.932782 |
| hsa:260425 | MAGI3    | cytoplasm | hsa:5787  | PTPRB  | extracellular   | 4.711202 |
| hsa:9351   | SLC9A3R2 | nucleus   | hsa:5728  | PTEN   | cytoplasm       | 4.711202 |
| hsa:1844   | DUSP2    | nucleus   | hsa:1432  | MAPK14 | cytoplasm       | 4.675648 |
| hsa:1846   | DUSP4    | nucleus   | hsa:1432  | MAPK14 | cytoplasm       | 4.675648 |
| hsa:1844   | DUSP2    | nucleus   | hsa:5594  | MAPK1  | cytoplasm       | 4.675648 |
| hsa:1847   | DUSP5    | nucleus   | hsa:5594  | MAPK1  | cytoplasm       | 4.675648 |
| hsa:1846   | DUSP4    | nucleus   | hsa:5594  | MAPK1  | cytoplasm       | 4.675648 |
| hsa:1846   | DUSP4    | nucleus   | hsa:5599  | MAPK8  | cytoplasm       | 4.675648 |
| hsa:1846   | DUSP4    | nucleus   | hsa:5601  | MAPK9  | cytoplasm       | 4.675648 |
| hsa:25888  | ZNF473   | nucleus   | hsa:90933 | TRIM41 | cytoplasm       | 4.506367 |
| hsa:59348  | ZNF350   | nucleus   | hsa:26994 | RNF11  | cytoplasm       | 4.506367 |
| hsa:8517   | IKBK     | nucleus   | hsa:26994 | RNF11  | cytoplasm       | 4.506367 |
| hsa:26036  | ZNF451   | nucleus   | hsa:9810  | RNF40  | cytoplasm       | 4.506367 |
| hsa:10127  | ZNF263   | nucleus   | hsa:90933 | TRIM41 | cytoplasm       | 4.506367 |
| hsa:8328   | GFI1B    | nucleus   | hsa:55072 | RNF31  | cytoplasm       | 4.506367 |
| hsa:653121 | unknown  | nucleus   | hsa:90933 | TRIM41 | cytoplasm       | 4.506367 |
| hsa:57473  | ZNF512B  | nucleus   | hsa:27072 | VPS41  | cytoplasm       | 4.506367 |
| hsa:6667   | SP1      | nucleus   | hsa:25897 | RNF19A | cytoplasm       | 4.506367 |
| hsa:54840  | APTX     | nucleus   | hsa:4591  | TRIM37 | cytoplasm       | 4.506367 |
| hsa:147687 | ZNF417   | nucleus   | hsa:4591  | TRIM37 | cytoplasm       | 4.506367 |
| hsa:5178   | PEG3     | nucleus   | hsa:7186  | TRAF2  | cytoplasm       | 4.506367 |
| hsa:7597   | ZBTB25   | nucleus   | hsa:7186  | TRAF2  | cytoplasm       | 4.506367 |
| hsa:59269  | HIVEP3   | nucleus   | hsa:7186  | TRAF2  | cytoplasm       | 4.506367 |
| hsa:23099  | ZBTB43   | nucleus   | hsa:7186  | TRAF2  | cytoplasm       | 4.506367 |
| hsa:25988  | MIZF     | nucleus   | hsa:7186  | TRAF2  | cytoplasm       | 4.506367 |
| hsa:9726   | ZNF646   | nucleus   | hsa:7186  | TRAF2  | cytoplasm       | 4.506367 |
| hsa:10906  | TRAFD1   | nucleus   | hsa:7189  | TRAF6  | cytoplasm       | 4.506367 |
| hsa:171392 | ZNF675   | nucleus   | hsa:7189  | TRAF6  | cytoplasm       | 4.506367 |
| hsa:8517   | IKBK     | nucleus   | hsa:329   | BIRC2  | cytoplasm       | 4.506367 |
| hsa:126070 | ZNF440   | nucleus   | hsa:64219 | PJA1   | cytoplasm       | 4.506367 |
| hsa:51545  | ZNF581   | nucleus   | hsa:373   | TRIM23 | cytoplasm       | 4.506367 |
| hsa:8328   | GFI1B    | nucleus   | hsa:25898 | RCHY1  | cytoplasm       | 4.506367 |
| hsa:8328   | GFI1B    | nucleus   | hsa:11043 | MID2   | cytoplasm       | 4.506367 |
| hsa:10127  | ZNF263   | nucleus   | hsa:90933 | TRIM41 | cytoplasm       | 4.506367 |
| hsa:25888  | ZNF473   | nucleus   | hsa:90933 | TRIM41 | cytoplasm       | 4.506367 |

|            |              |           |           |         |                 |          |
|------------|--------------|-----------|-----------|---------|-----------------|----------|
| hsa:147687 | ZNF417       | nucleus   | hsa:4591  | TRIM37  | cytoplasm       | 4.506367 |
| hsa:25988  | MIZF         | nucleus   | hsa:7186  | TRAF2   | cytoplasm       | 4.506367 |
| hsa:26036  | ZNF451       | nucleus   | hsa:9810  | RNF40   | cytoplasm       | 4.506367 |
| hsa:51545  | ZNF581       | nucleus   | hsa:373   | TRIM23  | cytoplasm       | 4.506367 |
| hsa:653121 | ZBTB8        | nucleus   | hsa:90933 | TRIM41  | cytoplasm       | 4.506367 |
| hsa:7597   | ZNF46        | nucleus   | hsa:7186  | TRAF2   | cytoplasm       | 4.506367 |
| hsa:84775  | ZNF607       | nucleus   | hsa:4188  | MDFI    | cytoplasm       | 4.506367 |
| hsa:90594  | ZNF439       | nucleus   | hsa:4188  | MDFI    | cytoplasm       | 4.506367 |
| hsa:9726   | ZNF646       | nucleus   | hsa:7186  | TRAF2   | cytoplasm       | 4.506367 |
| hsa:9841   | ZBTB24       | nucleus   | hsa:4188  | MDFI    | cytoplasm       | 4.506367 |
| hsa:1019   | CDK4         | cytoplasm | hsa:1028  | CDKN1C  | extracellular   | 4.410487 |
| hsa:983    | CDC2         | nucleus   | hsa:3306  | HSPA2   | cytoplasm       | 4.410487 |
| hsa:4678   | NASP         | nucleus   | hsa:9706  | ULK2    | cytoplasm       | 4.410487 |
| hsa:80155  | NARG1        | nucleus   | hsa:23043 | TNIK    | cytoplasm       | 4.410487 |
| hsa:4678   | NASP         | nucleus   | hsa:6446  | SGK     | cytoplasm       | 4.410487 |
| hsa:5062   | PAK2         | cytoplasm | hsa:11052 | CPSF6   | extracellular   | 4.410487 |
| hsa:80155  | NARG1        | nucleus   | hsa:9641  | IKBKE   | cytoplasm       | 4.410487 |
| hsa:55761  | TTC17        | nucleus   | hsa:90    | ACVR1   | cytoplasm       | 4.410487 |
| hsa:8473   | OGT          | nucleus   | hsa:2932  | GSK3B   | cytoplasm       | 4.410487 |
| hsa:55761  | TTC17        | nucleus   | hsa:658   | BMPR1B  | cytoplasm       | 4.410487 |
| hsa:8473   | OGT          | nucleus   | hsa:1457  | CSNK2A1 | cytoplasm       | 4.410487 |
| hsa:5536   | PPP5C        | nucleus   | hsa:4217  | MAP3K5  | cytoplasm       | 4.410487 |
| hsa:24148  | PRPF6        | nucleus   | hsa:369   | ARAF    | cytoplasm       | 4.410487 |
| hsa:3984   | LIMK1        | cytoplasm | hsa:1028  | CDKN1C  | extracellular   | 4.410487 |
| hsa:4678   | NASP         | nucleus   | hsa:9641  | IKBKE   | cytoplasm       | 4.410487 |
| hsa:8473   | OGT          | nucleus   | hsa:1017  | CDK2    | cytoplasm       | 4.410487 |
| hsa:9641   | IKBKE        | cytoplasm | hsa:11052 | CPSF6   | extracellular   | 4.410487 |
| hsa:4678   | NASP         | nucleus   | hsa:9706  | ULK2    | cytoplasm       | 4.410487 |
| hsa:5566   | PRKACA730418 | cytoplasm | hsa:3757  | KCNH2   | plasma membrane | 4.34748  |
| hsa:10114  | HIPK3        | nucleus   | hsa:3985  | LIMK2   | cytoplasm       | 4.113949 |
| hsa:55631  | LRRC40       | cytoplasm | hsa:3106  | unknown | extracellular   | 4.084589 |
| hsa:80824  | DUSP16       | nucleus   | hsa:1432  | MAPK14  | cytoplasm       | 4.00525  |
| hsa:51657  | STYXL1       | nucleus   | hsa:7046  | TGFBR1  | cytoplasm       | 4.00525  |
| hsa:80824  | DUSP16       | nucleus   | hsa:5594  | MAPK1   | cytoplasm       | 4.00525  |
| hsa:80824  | DUSP16       | nucleus   | hsa:5599  | MAPK8   | cytoplasm       | 4.00525  |
| hsa:80824  | DUSP16       | nucleus   | hsa:5602  | MAPK10  | cytoplasm       | 4.00525  |
| hsa:80824  | DUSP16       | nucleus   | hsa:5601  | MAPK9   | cytoplasm       | 4.00525  |
| hsa:80824  | DUSP16       | nucleus   | hsa:5600  | MAPK11  | cytoplasm       | 4.00525  |
| hsa:6196   | RPS6KA2      | nucleus   | hsa:5604  | MAP2K1  | cytoplasm       | 3.957832 |
| hsa:5595   | MAPK3        | nucleus   | hsa:9846  | GAB2    | cytoplasm       | 3.717411 |
| hsa:5595   | MAPK3        | nucleus   | hsa:2549  | GAB1    | cytoplasm       | 3.717411 |
| hsa:5595   | MAPK3        | nucleus   | hsa:156   | ADRBK1  | cytoplasm       | 3.717411 |
| hsa:983    | CDC2         | nucleus   | hsa:1785  | DNM2    | cytoplasm       | 3.717411 |
| hsa:6196   | RPS6KA2      | nucleus   | hsa:50944 | SHANK1  | cytoplasm       | 3.613373 |
| hsa:5595   | MAPK3        | nucleus   | hsa:5829  | PXN     | cytoplasm       | 3.60858  |
| hsa:10114  | HIPK3        | nucleus   | hsa:8994  | LIMD1   | cytoplasm       | 3.60858  |
| hsa:10114  | HIPK3        | nucleus   | hsa:7791  | ZYX     | cytoplasm       | 3.60858  |

|           |         |           |            |         |                 |          |
|-----------|---------|-----------|------------|---------|-----------------|----------|
| hsa:10114 | HIPK3   | nucleus   | hsa:7041   | TGFB1I1 | cytoplasm       | 3.60858  |
| hsa:10114 | HIPK3   | nucleus   | hsa:5998   | RGS3    | cytoplasm       | 3.477853 |
| hsa:995   | CDC25C  | nucleus   | hsa:84446  | BRSK1   | cytoplasm       | 3.430379 |
| hsa:995   | CDC25C  | nucleus   | hsa:9024   | BRSK2   | cytoplasm       | 3.430379 |
| hsa:995   | CDC25C  | nucleus   | hsa:1263   | PLK3    | cytoplasm       | 3.430379 |
| hsa:995   | CDC25C  | nucleus   | hsa:4140   | MARK3   | cytoplasm       | 3.430379 |
| hsa:995   | CDC25C  | nucleus   | hsa:1432   | MAPK14  | cytoplasm       | 3.430379 |
| hsa:995   | CDC25C  | nucleus   | hsa:3932   | LCK     | cytoplasm       | 3.430379 |
| hsa:995   | CDC25C  | nucleus   | hsa:5585   | PKN1    | cytoplasm       | 3.430379 |
| hsa:3932  | LCK     | cytoplasm | hsa:919    | CD247   | extracellular   | 3.327779 |
| hsa:6850  | SYK     | cytoplasm | hsa:150372 | NFAM1   | extracellular   | 3.327779 |
| hsa:6850  | SYK     | cytoplasm | hsa:7305   | TYROBP  | extracellular   | 3.327779 |
| hsa:6850  | SYK     | cytoplasm | hsa:2207   | FCER1G  | extracellular   | 3.327779 |
| hsa:3718  | JAK3    | cytoplasm | hsa:919    | CD247   | extracellular   | 3.327779 |
| hsa:6464  | SHC1    | cytoplasm | hsa:919    | CD247   | extracellular   | 3.327779 |
| hsa:4067  | LYN     | cytoplasm | hsa:2207   | FCER1G  | extracellular   | 3.327779 |
| hsa:2534  | FYN     | cytoplasm | hsa:919    | CD247   | extracellular   | 3.327779 |
| hsa:2885  | GRB2    | cytoplasm | hsa:919    | CD247   | extracellular   | 3.327779 |
| hsa:1445  | CSK     | cytoplasm | hsa:919    | CD247   | extracellular   | 3.327779 |
| hsa:10019 | SH2B3   | cytoplasm | hsa:919    | CD247   | extracellular   | 3.327779 |
| hsa:7535  | ZAP70   | cytoplasm | hsa:150372 | NFAM1   | extracellular   | 3.327779 |
| hsa:7535  | ZAP70   | cytoplasm | hsa:7305   | TYROBP  | extracellular   | 3.327779 |
| hsa:5336  | PLCG2   | cytoplasm | hsa:2207   | FCER1G  | extracellular   | 3.327779 |
| hsa:695   | BTK     | cytoplasm | hsa:2207   | FCER1G  | extracellular   | 3.327779 |
| hsa:84174 | SLA2    | cytoplasm | hsa:919    | CD247   | extracellular   | 3.327779 |
| hsa:6503  | SLA     | cytoplasm | hsa:919    | CD247   | extracellular   | 3.327779 |
| hsa:7535  | ZAP70   | cytoplasm | hsa:919    | CD247   | extracellular   | 3.327779 |
| hsa:7153  | TOP2A   | nucleus   | hsa:6732   | SRPK1   | cytoplasm       | 3.307865 |
| hsa:7153  | TOP2A   | nucleus   | hsa:5578   | PRKCA   | cytoplasm       | 3.307865 |
| hsa:7153  | TOP2A   | nucleus   | hsa:1457   | CSNK2A1 | cytoplasm       | 3.307865 |
| hsa:7153  | TOP2A   | nucleus   | hsa:5579   | PRKCB1  | cytoplasm       | 3.307865 |
| hsa:7153  | TOP2A   | nucleus   | hsa:5582   | PRKCG   | cytoplasm       | 3.307865 |
| hsa:5798  | PTPRN   | cytoplasm | hsa:11122  | PTPRT   | extracellular   | 3.26317  |
| hsa:5788  | PTPRC   | cytoplasm | hsa:3454   | IFNAR1  | extracellular   | 3.26317  |
| hsa:5771  | PTPN2   | cytoplasm | hsa:2690   | GHR     | plasma membrane | 3.26317  |
| hsa:5795  | PTPRJ   | cytoplasm | hsa:3561   | IL2RG   | extracellular   | 3.26317  |
| hsa:5770  | PTPN1   | cytoplasm | hsa:2690   | GHR     | plasma membrane | 3.26317  |
| hsa:5780  | PTPN9   | cytoplasm | hsa:2690   | GHR     | plasma membrane | 3.26317  |
| hsa:5774  | PTPN3   | cytoplasm | hsa:2690   | GHR     | plasma membrane | 3.26317  |
| hsa:983   | CDC2    | nucleus   | hsa:1894   | ECT2    | cytoplasm       | 3.210306 |
| hsa:5347  | PLK1    | nucleus   | hsa:1894   | ECT2    | cytoplasm       | 3.210306 |
| hsa:55743 | CHFR    | nucleus   | hsa:6790   | AURKA   | cytoplasm       | 2.956305 |
| hsa:11252 | PACSIN2 | cytoplasm | hsa:59341  | TRPV4   | plasma membrane | 2.692116 |
| hsa:29993 | PACSIN1 | cytoplasm | hsa:59341  | TRPV4   | plasma membrane | 2.692116 |
| hsa:29763 | PACSIN3 | cytoplasm | hsa:59341  | TRPV4   | plasma membrane | 2.692116 |
| hsa:54961 | SSH3    | nucleus   | hsa:3984   | LIMK1   | cytoplasm       | 2.640252 |
| hsa:5292  | PIM1    | nucleus   | hsa:660    | BMX     | cytoplasm       | 2.619811 |



|           |         |           |           |         |                 |          |
|-----------|---------|-----------|-----------|---------|-----------------|----------|
| hsa:5578  | PRKCA   | cytoplasm | hsa:846   | CASR    | plasma membrane | 2.432069 |
| hsa:5579  | PRKCB1  | cytoplasm | hsa:846   | CASR    | plasma membrane | 2.432069 |
| hsa:5582  | PRKCG   | cytoplasm | hsa:846   | CASR    | plasma membrane | 2.432069 |
| hsa:394   | ARHGAP5 | nucleus   | hsa:2185  | PTK2B   | cytoplasm       | 2.430268 |
| hsa:1022  | CDK7    | nucleus   | hsa:3927  | LASP1   | cytoplasm       | 2.427995 |
| hsa:5781  | PTPN11  | cytoplasm | hsa:4914  | NTRK1   | plasma membrane | 2.226038 |
| hsa:5347  | PLK1    | nucleus   | hsa:9088  | PKMYT1  | cytoplasm       | 2.205244 |
| hsa:1024  | CDK8    | nucleus   | hsa:1030  | CDKN2B  | cytoplasm       | 2.205244 |
| hsa:56893 | UBQLN4  | nucleus   | hsa:1760  | DMPK    | cytoplasm       | 2.205244 |
| hsa:5901  | RAN     | nucleus   | hsa:91754 | NEK9    | cytoplasm       | 2.145471 |
| hsa:5901  | RAN     | nucleus   | hsa:7046  | TGFBR1  | cytoplasm       | 2.145471 |
| hsa:379   | ARL4D   | nucleus   | hsa:7046  | TGFBR1  | cytoplasm       | 2.145471 |
| hsa:5901  | RAN     | nucleus   | hsa:658   | BMPRI1B | cytoplasm       | 2.145471 |
| hsa:5906  | RAP1A   | cytoplasm | hsa:4914  | NTRK1   | plasma membrane | 2.145471 |
| hsa:5595  | MAPK3   | nucleus   | hsa:6850  | SYK     | cytoplasm       | 2.071011 |
