# Supplementary material
Source: PubMed Central journal article supplement (PMC2742434)
Supplement: M800354-MCP200_4.pdf [file M800354-MCP200_4.pdf]

| Novel signaling pathways                                                                                                                                                                                                                                                                                                                                                                                                                     | Pathway length | PIDS mean  |
|----------------------------------------------------------------------------------------------------------------------------------------------------------------------------------------------------------------------------------------------------------------------------------------------------------------------------------------------------------------------------------------------------------------------------------------------|----------------|------------|
| hsa:27242( TNFRSF21 , extracellular ) - 10.293165 -> hsa:8717( TRADD , cytoplasm ) - 333.574783 -> hsa:7186( TRAF2 , cytoplasm ) - 24.033959 -> hsa:7314( UBB , nucleus )                                                                                                                                                                                                                                                                    | 4              | 122.633969 |
| hsa:356( FASLG , extracellular ) - 43.531509 -> hsa:355( FAS , extracellular ) - 10.293165 -> hsa:8717( TRADD , cytoplasm ) - 333.574783 -> hsa:7186( TRAF2 , cytoplasm ) - 24.033959 -> hsa:7314( UBB , nucleus )                                                                                                                                                                                                                           | 5              | 102.858354 |
| hsa:8743( TNFSF10 , extracellular ) - 43.531509 -> hsa:8797( TNFRSF10A , extracellular ) - 10.293165 -> hsa:8717( TRADD , cytoplasm ) - 333.574783 -> hsa:7186( TRAF2 , cytoplasm ) - 24.033959 -> hsa:7314( UBB , nucleus )                                                                                                                                                                                                                 | 5              | 102.858354 |
| hsa:9241( NOG , extracellular ) - 103.646450 -> hsa:655( BMP7 , extracellular ) - 65.460916 -> hsa:90( ACVR1 , cytoplasm ) - 8.820974 -> hsa:3551( IKKB , cytoplasm ) - 3.032210 -> hsa:8517( IKBK , nucleus ) - 4.506367 -> hsa:329( BIRC2 , cytoplasm ) - 31.191408 -> hsa:8717( TRADD , cytoplasm ) - 333.574783 -> hsa:7186( TRAF2 , cytoplasm ) - 24.033959 -> hsa:5886( RAD23A , nucleus )                                             | 9              | 71.783383  |
| hsa:7099( TLR4 , extracellular ) - 25.443587 -> hsa:4615( MYD88 , plasma membrane ) - 114.368497 -> hsa:8405( SPOP , nucleus )                                                                                                                                                                                                                                                                                                               | 3              | 69.906042  |
| hsa:7100( TLR5 , extracellular ) - 25.443587 -> hsa:4615( MYD88 , plasma membrane ) - 114.368497 -> hsa:8405( SPOP , nucleus )                                                                                                                                                                                                                                                                                                               | 3              | 69.906042  |
| hsa:9241( NOG , extracellular ) - 103.646450 -> hsa:655( BMP7 , extracellular ) - 65.460916 -> hsa:90( ACVR1 , cytoplasm ) - 8.820974 -> hsa:3551( IKKB , cytoplasm ) - 3.032210 -> hsa:8517( IKBK , nucleus ) - 4.506367 -> hsa:329( BIRC2 , cytoplasm ) - 31.191408 -> hsa:8717( TRADD , cytoplasm ) - 333.574783 -> hsa:7186( TRAF2 , cytoplasm ) - 6.595756 -> hsa:11035( RIPK3 , cytoplasm ) - 4.410487 -> hsa:3178( HNRNP1 , nucleus ) | 10             | 62.359928  |
| hsa:9241( NOG , extracellular ) - 103.646450 -> hsa:655( BMP7 , extracellular ) - 65.460916 -> hsa:658( BMPR1B , cytoplasm ) - 17.330023 -> hsa:4091( SMAD6 , nucleus )                                                                                                                                                                                                                                                                      | 4              | 62.145796  |
| hsa:9241( NOG , extracellular ) - 103.646450 -> hsa:655( BMP7 , extracellular ) - 65.460916 -> hsa:658( BMPR1B , cytoplasm ) - 17.330023 -> hsa:4092( SMAD7 , nucleus )                                                                                                                                                                                                                                                                      | 4              | 62.145796  |
| hsa:9241( NOG , extracellular ) - 103.646450 -> hsa:655( BMP7 , extracellular ) - 65.460916 -> hsa:90( ACVR1 , cytoplasm ) - 17.330023 -> hsa:4086( SMAD1 , nucleus )                                                                                                                                                                                                                                                                        | 4              | 62.145796  |
| hsa:9241( NOG , extracellular ) - 103.646450 -> hsa:655( BMP7 , extracellular ) - 65.460916 -> hsa:90( ACVR1 , cytoplasm ) - 17.330023 -> hsa:4093( SMAD9 , nucleus )                                                                                                                                                                                                                                                                        | 4              | 62.145796  |
| hsa:9241( NOG , extracellular ) - 103.646450 -> hsa:655( BMP7 , extracellular ) - 65.460916 -> hsa:90( ACVR1 , cytoplasm ) - 17.330023 -> hsa:4090( SMAD5 , nucleus )                                                                                                                                                                                                                                                                        | 4              | 62.145796  |
| hsa:9241( NOG , extracellular ) - 103.646450 -> hsa:655( BMP7 , extracellular ) - 65.460916 -> hsa:90( ACVR1 , cytoplasm ) - 8.820974 -> hsa:3551( IKKB , cytoplasm ) - 3.032210 -> hsa:8517( IKBK , nucleus ) - 4.506367 -> hsa:329( BIRC2 , cytoplasm ) - 31.191408 -> hsa:8717( TRADD , cytoplasm ) - 333.574783 -> hsa:7186( TRAF2 , cytoplasm ) - 6.595756 -> hsa:1025( CDK9 , nucleus ) - 2.205244 -> hsa:904( CCNT1 , nucleus )       | 10             | 62.114901  |
| hsa:9241( NOG , extracellular ) - 103.646450 -> hsa:655( BMP7 , extracellular ) - 65.460916 -> hsa:90( ACVR1 , cytoplasm ) - 8.820974 -> hsa:7311( UBA52 , nucleus )                                                                                                                                                                                                                                                                         | 4              | 59.309447  |
| hsa:9241( NOG , extracellular ) - 103.646450 -> hsa:655( BMP7 , extracellular ) - 65.460916 -> hsa:90( ACVR1 , cytoplasm ) - 4.410487 -> hsa:6256( RXRA , nucleus )                                                                                                                                                                                                                                                                          | 4              | 57.839284  |
| hsa:9241( NOG , extracellular ) - 103.646450 -> hsa:655( BMP7 , extracellular ) - 65.460916 -> hsa:90( ACVR1 , cytoplasm ) - 4.410487 -> hsa:7068( THRB , nucleus )                                                                                                                                                                                                                                                                          | 4              | 57.839284  |
| hsa:9241( NOG , extracellular ) - 103.646450 -> hsa:655( BMP7 , extracellular ) - 65.460916 -> hsa:90( ACVR1 , cytoplasm ) - 4.410487 -> hsa:7421( VDR , nucleus )                                                                                                                                                                                                                                                                           | 4              | 57.839284  |
| hsa:9241( NOG , extracellular ) - 103.646450 -> hsa:655( BMP7 , extracellular ) - 65.460916 -> hsa:657( BMPR1A , cytoplasm ) - 4.410487 -> hsa:10262( SF3B4 , nucleus )                                                                                                                                                                                                                                                                      | 4              | 57.839284  |

|                                                                                                                                                                                                                                                                                                                                                                                                                                             |    |           |
|---------------------------------------------------------------------------------------------------------------------------------------------------------------------------------------------------------------------------------------------------------------------------------------------------------------------------------------------------------------------------------------------------------------------------------------------|----|-----------|
| hsa:9241( NOG , extracellular ) - 103.646450 -> hsa:655( BMP7 , extracellular ) - 65.460916 -> hsa:659( BMPR2 , cytoplasm ) - 4.410487 -> hsa:10236( HNRNPR , nucleus )                                                                                                                                                                                                                                                                     | 4  | 57.839284 |
| hsa:3625( INHBB , extracellular ) - 65.460916 -> hsa:90( ACVR1 , cytoplasm ) - 8.820974 -> hsa:3551( IKKKB , cytoplasm ) - 3.032210 -> hsa:8517( IKKKG , nucleus ) - 4.506367 -> hsa:329( BIRC2 , cytoplasm ) - 31.191408 -> hsa:8717( TRADD , cytoplasm ) - 333.574783 -> hsa:7186( TRAF2 , cytoplasm ) - 6.595756 -> hsa:1025( CDK9 , nucleus ) - 2.205244 -> hsa:904( CCNT1 , nucleus )                                                  | 9  | 56.923457 |
| hsa:4050( LTB , extracellular ) - 43.531509 -> hsa:7132( TNFRSF1A , extracellular ) - 90.351112 -> hsa:7186( TRAF2 , cytoplasm ) - 24.033959 -> hsa:7314( UBB , nucleus )                                                                                                                                                                                                                                                                   | 4  | 52.63886  |
| hsa:3625( INHBB , extracellular ) - 65.460916 -> hsa:90( ACVR1 , cytoplasm ) - 8.820974 -> hsa:3551( IKKKB , cytoplasm ) - 3.032210 -> hsa:8517( IKKKG , nucleus ) - 4.506367 -> hsa:329( BIRC2 , cytoplasm ) - 31.191408 -> hsa:8717( TRADD , cytoplasm ) - 333.574783 -> hsa:7186( TRAF2 , cytoplasm ) - 6.595756 -> hsa:1025( CDK9 , nucleus ) - 13.231462 -> hsa:27148( STK36 , cytoplasm ) - 3.032210 -> hsa:2736( GLI2 , nucleus )    | 10 | 52.160676 |
| hsa:3626( INHBC , extracellular ) - 65.460916 -> hsa:90( ACVR1 , cytoplasm ) - 8.820974 -> hsa:3551( IKKKB , cytoplasm ) - 3.032210 -> hsa:8517( IKKKG , nucleus ) - 4.506367 -> hsa:329( BIRC2 , cytoplasm ) - 31.191408 -> hsa:8717( TRADD , cytoplasm ) - 333.574783 -> hsa:7186( TRAF2 , cytoplasm ) - 6.595756 -> hsa:1025( CDK9 , nucleus ) - 13.231462 -> hsa:27148( STK36 , cytoplasm ) - 3.032210 -> hsa:2736( GLI2 , nucleus )    | 10 | 52.160676 |
| hsa:3553( IL1B , extracellular ) - 15.249133 -> hsa:3554( IL1R1 , extracellular ) - 26.209447 -> hsa:4615( MYD88 , plasma membrane ) - 114.368497 -> hsa:8405( SPOP , nucleus )                                                                                                                                                                                                                                                             | 4  | 51.942359 |
| hsa:3552( IL1A , extracellular ) - 15.249133 -> hsa:3554( IL1R1 , extracellular ) - 26.209447 -> hsa:4615( MYD88 , plasma membrane ) - 114.368497 -> hsa:8405( SPOP , nucleus )                                                                                                                                                                                                                                                             | 4  | 51.942359 |
| hsa:84639( IL1F10 , extracellular ) - 15.249133 -> hsa:3554( IL1R1 , extracellular ) - 26.209447 -> hsa:4615( MYD88 , plasma membrane ) - 114.368497 -> hsa:8405( SPOP , nucleus )                                                                                                                                                                                                                                                          | 4  | 51.942359 |
| hsa:3557( IL1RN , extracellular ) - 15.249133 -> hsa:3554( IL1R1 , extracellular ) - 26.209447 -> hsa:4615( MYD88 , plasma membrane ) - 114.368497 -> hsa:8405( SPOP , nucleus )                                                                                                                                                                                                                                                            | 4  | 51.942359 |
| hsa:3625( INHBB , extracellular ) - 65.460916 -> hsa:90( ACVR1 , cytoplasm ) - 8.820974 -> hsa:3551( IKKKB , cytoplasm ) - 3.032210 -> hsa:8517( IKKKG , nucleus ) - 4.506367 -> hsa:329( BIRC2 , cytoplasm ) - 31.191408 -> hsa:8717( TRADD , cytoplasm ) - 333.574783 -> hsa:7186( TRAF2 , cytoplasm ) - 6.595756 -> hsa:23139( MAST2 , cytoplasm ) - 4.485446 -> hsa:27148( STK36 , cytoplasm ) - 3.032210 -> hsa:2735( GLI1 , nucleus ) | 10 | 51.188897 |
| hsa:3626( INHBC , extracellular ) - 65.460916 -> hsa:90( ACVR1 , cytoplasm ) - 8.820974 -> hsa:3551( IKKKB , cytoplasm ) - 3.032210 -> hsa:8517( IKKKG , nucleus ) - 4.506367 -> hsa:329( BIRC2 , cytoplasm ) - 31.191408 -> hsa:8717( TRADD , cytoplasm ) - 333.574783 -> hsa:7186( TRAF2 , cytoplasm ) - 6.595756 -> hsa:23139( MAST2 , cytoplasm ) - 4.485446 -> hsa:27148( STK36 , cytoplasm ) - 3.032210 -> hsa:2735( GLI1 , nucleus ) | 10 | 51.188897 |
| hsa:10673( TNFSF13B , extracellular ) - 60.575592 -> hsa:23495( TNFRSF13B , endoplasmic reticulum ) - 66.333728 -> hsa:7189( TRAF6 , cytoplasm ) - 24.033959 -> hsa:7314( UBB , nucleus )                                                                                                                                                                                                                                                   | 4  | 50.314426 |
| hsa:8741( unknown , extracellular ) - 60.575592 -> hsa:23495( TNFRSF13B , endoplasmic reticulum ) - 66.333728 -> hsa:7189( TRAF6 , cytoplasm ) - 24.033959 -> hsa:7314( UBB , nucleus )                                                                                                                                                                                                                                                     | 4  | 50.314426 |
| hsa:140885( SIRPA , extracellular ) - 3.864441 -> hsa:3556( IL1RAP , extracellular ) - 26.209447 -> hsa:4615( MYD88 , plasma membrane ) - 114.368497 -> hsa:8405( SPOP , nucleus )                                                                                                                                                                                                                                                          | 4  | 48.147462 |
| hsa:9241( NOG , extracellular ) - 103.646450 -> hsa:655( BMP7 , extracellular ) - 65.460916 -> hsa:90( ACVR1 , cytoplasm ) - 8.820974 -> hsa:3551( IKKKB , cytoplasm ) - 8.820974 -> hsa:7314( UBB , nucleus )                                                                                                                                                                                                                              | 5  | 46.687329 |
| hsa:9241( NOG , extracellular ) - 103.646450 -> hsa:655( BMP7 , extracellular ) - 65.460916 -> hsa:90( ACVR1 , cytoplasm ) - 8.820974 -> hsa:3551( IKKKB , cytoplasm ) - 4.410487 -> hsa:7182( NR2C2 , nucleus )                                                                                                                                                                                                                            | 5  | 45.584707 |
| hsa:55504( TNFRSF19 , extracellular ) - 66.333728 -> hsa:7189( TRAF6 , cytoplasm ) - 24.033959 -> hsa:7314( UBB , nucleus )                                                                                                                                                                                                                                                                                                                 | 3  | 45.183843 |

|                                                                                                                                                                                                                                                                                                    |   |           |
|----------------------------------------------------------------------------------------------------------------------------------------------------------------------------------------------------------------------------------------------------------------------------------------------------|---|-----------|
| hsa:9241( NOG , extracellular ) - 103.646450 -> hsa:655( BMP7 , extracellular ) - 65.460916 -> hsa:90( ACVR1 , cytoplasm ) - 8.820974 -> hsa:3551( IKKBK , cytoplasm ) - 2.520278 -> hsa:8202( NCOA3 , nucleus )                                                                                   | 5 | 45.112155 |
| hsa:9241( NOG , extracellular ) - 103.646450 -> hsa:655( BMP7 , extracellular ) - 65.460916 -> hsa:90( ACVR1 , cytoplasm ) - 8.820974 -> hsa:3551( IKKBK , cytoplasm ) - 2.205244 -> hsa:5970( RELA , nucleus )                                                                                    | 5 | 45.033396 |
| hsa:944( TNFSF8 , extracellular ) - 43.531509 -> hsa:943( TNFRSF8 , extracellular ) - 66.333728 -> hsa:7186( TRAF2 , cytoplasm ) - 24.033959 -> hsa:7314( UBB , nucleus )                                                                                                                          | 4 | 44.633065 |
| hsa:1896( EDA , extracellular ) - 43.531509 -> hsa:60401( EDA2R , extracellular ) - 66.333728 -> hsa:7189( TRAF6 , cytoplasm ) - 24.033959 -> hsa:7314( UBB , nucleus )                                                                                                                            | 4 | 44.633065 |
| hsa:8600( TNFSF11 , extracellular ) - 43.531509 -> hsa:8792( TNFRSF11A , extracellular ) - 66.333728 -> hsa:7189( TRAF6 , cytoplasm ) - 24.033959 -> hsa:7314( UBB , nucleus )                                                                                                                     | 4 | 44.633065 |
| hsa:959( CD40LG , extracellular ) - 43.531509 -> hsa:958( CD40 , extracellular ) - 66.333728 -> hsa:7189( TRAF6 , cytoplasm ) - 24.033959 -> hsa:7314( UBB , nucleus )                                                                                                                             | 4 | 44.633065 |
| hsa:9966( TNFSF15 , extracellular ) - 43.531509 -> hsa:8718( TNFRSF25 , extracellular ) - 66.333728 -> hsa:7186( TRAF2 , cytoplasm ) - 24.033959 -> hsa:7314( UBB , nucleus )                                                                                                                      | 4 | 44.633065 |
| hsa:8740( TNFSF14 , extracellular ) - 43.531509 -> hsa:8764( TNFRSF14 , extracellular ) - 66.333728 -> hsa:7186( TRAF2 , cytoplasm ) - 24.033959 -> hsa:7314( UBB , nucleus )                                                                                                                      | 4 | 44.633065 |
| hsa:8742( TNFSF12 , extracellular ) - 43.531509 -> hsa:8718( TNFRSF25 , extracellular ) - 66.333728 -> hsa:7186( TRAF2 , cytoplasm ) - 24.033959 -> hsa:7314( UBB , nucleus )                                                                                                                      | 4 | 44.633065 |
| hsa:970( CD70 , extracellular ) - 43.531509 -> hsa:939( CD27 , extracellular ) - 66.333728 -> hsa:7186( TRAF2 , cytoplasm ) - 24.033959 -> hsa:7314( UBB , nucleus )                                                                                                                               | 4 | 44.633065 |
| hsa:7292( TNFSF4 , extracellular ) - 43.531509 -> hsa:7293( TNFRSF4 , extracellular ) - 66.333728 -> hsa:7186( TRAF2 , cytoplasm ) - 24.033959 -> hsa:7314( UBB , nucleus )                                                                                                                        | 4 | 44.633065 |
| hsa:8744( TNFSF9 , extracellular ) - 43.531509 -> hsa:3604( TNFRSF9 , extracellular ) - 66.333728 -> hsa:7186( TRAF2 , cytoplasm ) - 24.033959 -> hsa:7314( UBB , nucleus )                                                                                                                        | 4 | 44.633065 |
| hsa:8995( TNFSF18 , extracellular ) - 43.531509 -> hsa:8784( TNFRSF18 , extracellular ) - 66.333728 -> hsa:7186( TRAF2 , cytoplasm ) - 24.033959 -> hsa:7314( UBB , nucleus )                                                                                                                      | 4 | 44.633065 |
| hsa:654( BMP6 , extracellular ) - 65.460916 -> hsa:658( BMPR1B , cytoplasm ) - 17.330023 -> hsa:4091( SMAD6 , nucleus )                                                                                                                                                                            | 3 | 41.395469 |
| hsa:654( BMP6 , extracellular ) - 65.460916 -> hsa:658( BMPR1B , cytoplasm ) - 17.330023 -> hsa:4092( SMAD7 , nucleus )                                                                                                                                                                            | 3 | 41.395469 |
| hsa:654( BMP6 , extracellular ) - 65.460916 -> hsa:657( BMPR1A , cytoplasm ) - 17.330023 -> hsa:4086( SMAD1 , nucleus )                                                                                                                                                                            | 3 | 41.395469 |
| hsa:3625( INHBB , extracellular ) - 65.460916 -> hsa:91( ACVR1B , cytoplasm ) - 17.330023 -> hsa:4089( SMAD4 , nucleus )                                                                                                                                                                           | 3 | 41.395469 |
| hsa:3626( INHBC , extracellular ) - 65.460916 -> hsa:91( ACVR1B , cytoplasm ) - 17.330023 -> hsa:4089( SMAD4 , nucleus )                                                                                                                                                                           | 3 | 41.395469 |
| hsa:4049( LTA , extracellular ) - 43.531509 -> hsa:7133( TNFRSF1B , extracellular ) - 50.441272 -> hsa:7189( TRAF6 , cytoplasm ) - 24.033959 -> hsa:7314( UBB , nucleus )                                                                                                                          | 4 | 39.33558  |
| hsa:9241( NOG , extracellular ) - 103.646450 -> hsa:655( BMP7 , extracellular ) - 65.460916 -> hsa:90( ACVR1 , cytoplasm ) - 2.071011 -> hsa:1123( CHN1 , cytoplasm ) - 33.843739 -> hsa:5879( RAC1 , golgi ) - 15.788264 -> hsa:5058( PAK1 , cytoplasm ) - 4.410487 -> hsa:2099( ESR1 , nucleus ) | 7 | 37.536811 |
| hsa:7043( TGFEB3 , extracellular ) - 65.460916 -> hsa:7046( TGFBR1 , cytoplasm ) - 8.820974 -> hsa:7314( UBB , nucleus )                                                                                                                                                                           | 3 | 37.140945 |
| hsa:7042( TGFEB2 , extracellular ) - 65.460916 -> hsa:7046( TGFBR1 , cytoplasm ) - 8.820974 -> hsa:7314( UBB , nucleus )                                                                                                                                                                           | 3 | 37.140945 |
| hsa:654( BMP6 , extracellular ) - 65.460916 -> hsa:658( BMPR1B , cytoplasm ) - 8.820974 -> hsa:7311( UBA52 , nucleus )                                                                                                                                                                             | 3 | 37.140945 |
| hsa:3625( INHBB , extracellular ) - 65.460916 -> hsa:90( ACVR1 , cytoplasm ) - 8.820974 -> hsa:7311( UBA52 , nucleus )                                                                                                                                                                             | 3 | 37.140945 |
| hsa:3626( INHBC , extracellular ) - 65.460916 -> hsa:90( ACVR1 , cytoplasm ) - 8.820974 -> hsa:7311( UBA52 , nucleus )                                                                                                                                                                             | 3 | 37.140945 |
| hsa:2661( GDF9 , extracellular ) - 65.460916 -> hsa:658( BMPR1B , cytoplasm ) - 8.820974 -> hsa:7311( UBA52 , nucleus )                                                                                                                                                                            | 3 | 37.140945 |
| hsa:392255( GDF6 , extracellular ) - 65.460916 -> hsa:658( BMPR1B , cytoplasm ) - 8.820974 -> hsa:7311( UBA52 , nucleus )                                                                                                                                                                          | 3 | 37.140945 |

|                                                                                                                                                                                                                                                                                                                                                               |   |           |
|---------------------------------------------------------------------------------------------------------------------------------------------------------------------------------------------------------------------------------------------------------------------------------------------------------------------------------------------------------------|---|-----------|
| nucleus )                                                                                                                                                                                                                                                                                                                                                     |   |           |
| hsa:9210( BMP15 , extracellular ) - 65.460916 -> hsa:658( BMPR1B , cytoplasm ) - 8.820974 -> hsa:7311( UBA52 , nucleus )                                                                                                                                                                                                                                      | 3 | 37.140945 |
| hsa:9241( NOG , extracellular ) - 103.646450 -> hsa:655( BMP7 , extracellular ) - 65.460916 -> hsa:90( ACVR1 , cytoplasm ) - 2.071011 -> hsa:1123( CHN1 , cytoplasm ) - 33.843739 -> hsa:5879( RAC1 , golgi ) - 43.073849 -> hsa:7454( WAS , cytoplasm ) - 7.217161 -> hsa:1457( CSNK2A1 , cytoplasm ) - 4.410487 -> hsa:3181( HNRNPA2B1 , nucleus )          | 8 | 37.103373 |
| hsa:9241( NOG , extracellular ) - 103.646450 -> hsa:655( BMP7 , extracellular ) - 65.460916 -> hsa:658( BMPR1B , cytoplasm ) - 2.524005 -> hsa:9459( ARHGEF6 , cytoplasm ) - 29.522727 -> hsa:998( CDC42 , cytoplasm ) - 15.788264 -> hsa:56924( PAK6 , cytoplasm ) - 4.410487 -> hsa:2099( ESR1 , nucleus )                                                  | 7 | 36.892142 |
| hsa:9241( NOG , extracellular ) - 103.646450 -> hsa:655( BMP7 , extracellular ) - 65.460916 -> hsa:658( BMPR1B , cytoplasm ) - 2.524005 -> hsa:9459( ARHGEF6 , cytoplasm ) - 29.522727 -> hsa:998( CDC42 , cytoplasm ) - 15.788264 -> hsa:56924( PAK6 , cytoplasm ) - 4.410487 -> hsa:367( AR , nucleus )                                                     | 7 | 36.892142 |
| hsa:9241( NOG , extracellular ) - 103.646450 -> hsa:655( BMP7 , extracellular ) - 65.460916 -> hsa:658( BMPR1B , cytoplasm ) - 2.524005 -> hsa:9459( ARHGEF6 , cytoplasm ) - 29.522727 -> hsa:998( CDC42 , cytoplasm ) - 2.145471 -> hsa:5599( MAPK8 , cytoplasm ) - 16.171787 -> hsa:7157( TP53 , nucleus )                                                  | 7 | 36.578559 |
| hsa:9241( NOG , extracellular ) - 103.646450 -> hsa:655( BMP7 , extracellular ) - 65.460916 -> hsa:658( BMPR1B , cytoplasm ) - 2.524005 -> hsa:9459( ARHGEF6 , cytoplasm ) - 29.522727 -> hsa:998( CDC42 , cytoplasm ) - 43.073849 -> hsa:7454( WAS , cytoplasm ) - 7.217161 -> hsa:1457( CSNK2A1 , cytoplasm ) - 4.410487 -> hsa:3183( HNRNPC , nucleus )    | 8 | 36.550799 |
| hsa:9241( NOG , extracellular ) - 103.646450 -> hsa:655( BMP7 , extracellular ) - 65.460916 -> hsa:658( BMPR1B , cytoplasm ) - 2.524005 -> hsa:9459( ARHGEF6 , cytoplasm ) - 29.522727 -> hsa:998( CDC42 , cytoplasm ) - 43.073849 -> hsa:7454( WAS , cytoplasm ) - 7.217161 -> hsa:1457( CSNK2A1 , cytoplasm ) - 4.410487 -> hsa:3181( HNRNPA2B1 , nucleus ) | 8 | 36.550799 |
| hsa:10468( FST , extracellular ) - 34.548817 -> hsa:3624( INHBA , extracellular ) - 65.460916 -> hsa:90( ACVR1 , cytoplasm ) - 8.820974 -> hsa:7311( UBA52 , nucleus )                                                                                                                                                                                        | 4 | 36.276902 |
| hsa:10272( FSTL3 , extracellular ) - 34.548817 -> hsa:3624( INHBA , extracellular ) - 65.460916 -> hsa:90( ACVR1 , cytoplasm ) - 8.820974 -> hsa:7311( UBA52 , nucleus )                                                                                                                                                                                      | 4 | 36.276902 |
| hsa:5654( HTRA1 , extracellular ) - 34.548817 -> hsa:8200( GDF5 , extracellular ) - 65.460916 -> hsa:90( ACVR1 , cytoplasm ) - 8.820974 -> hsa:7311( UBA52 , nucleus )                                                                                                                                                                                        | 4 | 36.276902 |
| hsa:9241( NOG , extracellular ) - 103.646450 -> hsa:655( BMP7 , extracellular ) - 65.460916 -> hsa:658( BMPR1B , cytoplasm ) - 2.524005 -> hsa:9459( ARHGEF6 , cytoplasm ) - 29.522727 -> hsa:998( CDC42 , cytoplasm ) - 2.145471 -> hsa:5599( MAPK8 , cytoplasm ) - 13.231462 -> hsa:5591( PRKDC , nucleus )                                                 | 7 | 36.088505 |
| hsa:9241( NOG , extracellular ) - 103.646450 -> hsa:655( BMP7 , extracellular ) - 65.460916 -> hsa:658( BMPR1B , cytoplasm ) - 2.524005 -> hsa:9459( ARHGEF6 , cytoplasm ) - 29.522727 -> hsa:998( CDC42 , cytoplasm ) - 8.259484 -> hsa:23048( FNBP1 , cytoplasm ) - 2.692116 -> hsa:8658( TNKS , nucleus )                                                  | 7 | 35.35095  |
| hsa:9241( NOG , extracellular ) - 103.646450 -> hsa:655( BMP7 , extracellular ) - 65.460916 -> hsa:90( ACVR1 , cytoplasm ) - 2.071011 -> hsa:1123( CHN1 , cytoplasm ) - 33.843739 -> hsa:5879( RAC1 , golgi ) - 2.145471 -> hsa:5578( PRKCA , cytoplasm ) - 4.410487 -> hsa:5465( PPARA , nucleus )                                                           | 7 | 35.263012 |
| hsa:9241( NOG , extracellular ) - 103.646450 -> hsa:655( BMP7 , extracellular ) - 65.460916 -> hsa:90( ACVR1 , cytoplasm ) - 2.071011 -> hsa:1123( CHN1 , cytoplasm ) - 33.843739 -> hsa:5879( RAC1 , golgi ) - 2.145471 -> hsa:6198( RPS6KB1 , cytoplasm ) - 4.410487 -> hsa:84271( POLDIP3 , nucleus )                                                      | 7 | 35.263012 |
| hsa:9241( NOG , extracellular ) - 103.646450 -> hsa:655( BMP7 , extracellular ) - 65.460916 -> hsa:90( ACVR1 , cytoplasm ) - 2.071011 -> hsa:1123( CHN1 , cytoplasm ) - 33.843739 -> hsa:5879( RAC1 , golgi ) - 2.145471 -> hsa:5578( PRKCA , cytoplasm ) - 4.410487 -> hsa:5914( RARA , nucleus )                                                            | 7 | 35.263012 |
| hsa:9241( NOG , extracellular ) - 103.646450 -> hsa:655( BMP7 , extracellular ) - 65.460916 -> hsa:90( ACVR1 , cytoplasm ) - 2.071011 -> hsa:1123( CHN1 , cytoplasm ) - 33.843739 -> hsa:5879( RAC1 , golgi ) - 15.788264 ->                                                                                                                                  | 8 | 35.051081 |

|                                                                                                                                                                                                                                                                                                                                                   |   |           |
|---------------------------------------------------------------------------------------------------------------------------------------------------------------------------------------------------------------------------------------------------------------------------------------------------------------------------------------------------|---|-----------|
| hsa:5058( PAK1 , cytoplasm ) - 7.217161 -> hsa:658( BMPR1B , cytoplasm ) - 17.330023 -> hsa:4091( SMAD6 , nucleus )                                                                                                                                                                                                                               |   |           |
| hsa:9241( NOG , extracellular ) - 103.646450 -> hsa:655( BMP7 , extracellular ) - 65.460916 -> hsa:90( ACVR1 , cytoplasm ) - 2.071011 -> hsa:1123( CHN1 , cytoplasm ) - 33.843739 -> hsa:5879( RAC1 , golgi ) - 15.788264 -> hsa:5058( PAK1 , cytoplasm ) - 7.217161 -> hsa:7046( TGFBR1 , cytoplasm ) - 17.330023 -> hsa:4086( SMAD3 , nucleus ) | 8 | 35.051081 |
| hsa:9241( NOG , extracellular ) - 103.646450 -> hsa:655( BMP7 , extracellular ) - 65.460916 -> hsa:658( BMPR1B , cytoplasm ) - 2.071011 -> hsa:1123( CHN1 , cytoplasm ) - 33.843739 -> hsa:5879( RAC1 , golgi ) - 15.788264 -> hsa:5058( PAK1 , cytoplasm ) - 7.217161 -> hsa:90( ACVR1 , cytoplasm ) - 17.330023 -> hsa:4086( SMAD1 , nucleus )  | 8 | 35.051081 |
| hsa:654( BMP6 , extracellular ) - 65.460916 -> hsa:657( BMPR1A , cytoplasm ) - 4.410487 -> hsa:10262( SF3B4 , nucleus )                                                                                                                                                                                                                           | 3 | 34.935702 |
| hsa:654( BMP6 , extracellular ) - 65.460916 -> hsa:659( BMPR2 , cytoplasm ) - 4.410487 -> hsa:10236( HNRNPR , nucleus )                                                                                                                                                                                                                           | 3 | 34.935702 |
| hsa:3625( INHBB , extracellular ) - 65.460916 -> hsa:90( ACVR1 , cytoplasm ) - 4.410487 -> hsa:6256( RXRA , nucleus )                                                                                                                                                                                                                             | 3 | 34.935702 |
| hsa:3625( INHBB , extracellular ) - 65.460916 -> hsa:90( ACVR1 , cytoplasm ) - 4.410487 -> hsa:7068( THRB , nucleus )                                                                                                                                                                                                                             | 3 | 34.935702 |
| hsa:3626( INHBC , extracellular ) - 65.460916 -> hsa:90( ACVR1 , cytoplasm ) - 4.410487 -> hsa:6256( RXRA , nucleus )                                                                                                                                                                                                                             | 3 | 34.935702 |
| hsa:3626( INHBC , extracellular ) - 65.460916 -> hsa:90( ACVR1 , cytoplasm ) - 4.410487 -> hsa:7068( THRB , nucleus )                                                                                                                                                                                                                             | 3 | 34.935702 |
| hsa:9241( NOG , extracellular ) - 103.646450 -> hsa:650( BMP2 , extracellular ) - 65.460916 -> hsa:90( ACVR1 , cytoplasm ) - 8.820974 -> hsa:3551( IKKKB , cytoplasm ) - 3.032210 -> hsa:8517( IKKKG , nucleus ) - 4.506367 -> hsa:329( BIRC2 , cytoplasm ) - 24.033959 -> hsa:7314( UBB , nucleus )                                              | 7 | 34.916813 |
| hsa:9241( NOG , extracellular ) - 103.646450 -> hsa:655( BMP7 , extracellular ) - 65.460916 -> hsa:90( ACVR1 , cytoplasm ) - 8.820974 -> hsa:3551( IKKKB , cytoplasm ) - 3.032210 -> hsa:8517( IKKKG , nucleus ) - 4.506367 -> hsa:26994( RNF11 , cytoplasm ) - 24.033959 -> hsa:29978( UBQLN2 , nucleus )                                        | 7 | 34.916813 |
| hsa:9241( NOG , extracellular ) - 103.646450 -> hsa:655( BMP7 , extracellular ) - 65.460916 -> hsa:90( ACVR1 , cytoplasm ) - 8.820974 -> hsa:3551( IKKKB , cytoplasm ) - 3.032210 -> hsa:8517( IKKKG , nucleus ) - 4.506367 -> hsa:26994( RNF11 , cytoplasm ) - 24.033959 -> hsa:7316( unknown , nucleus )                                        | 7 | 34.916813 |
| hsa:9241( NOG , extracellular ) - 103.646450 -> hsa:655( BMP7 , extracellular ) - 65.460916 -> hsa:90( ACVR1 , cytoplasm ) - 2.071011 -> hsa:1123( CHN1 , cytoplasm ) - 33.843739 -> hsa:5879( RAC1 , golgi ) - 2.145471 -> hsa:5578( PRKCA , cytoplasm ) - 2.205244 -> hsa:4772( NFATC1 , nucleus )                                              | 7 | 34.895472 |
| hsa:9241( NOG , extracellular ) - 103.646450 -> hsa:655( BMP7 , extracellular ) - 65.460916 -> hsa:90( ACVR1 , cytoplasm ) - 2.071011 -> hsa:1123( CHN1 , cytoplasm ) - 33.843739 -> hsa:5879( RAC1 , golgi ) - 2.145471 -> hsa:5610( EIF2AK2 , nucleus ) - 2.071011 -> hsa:6772( STAT1 , nucleus )                                               | 7 | 34.8731   |
| hsa:9241( NOG , extracellular ) - 103.646450 -> hsa:655( BMP7 , extracellular ) - 65.460916 -> hsa:658( BMPR1B , cytoplasm ) - 2.524005 -> hsa:9459( ARHGEF6 , cytoplasm ) - 29.522727 -> hsa:998( CDC42 , cytoplasm ) - 2.145471 -> hsa:5599( MAPK8 , cytoplasm ) - 5.390596 -> hsa:122953( JDP2 , nucleus )                                     | 7 | 34.781694 |
| hsa:9241( NOG , extracellular ) - 103.646450 -> hsa:655( BMP7 , extracellular ) - 65.460916 -> hsa:658( BMPR1B , cytoplasm ) - 2.524005 -> hsa:9459( ARHGEF6 , cytoplasm ) - 29.522727 -> hsa:998( CDC42 , cytoplasm ) - 2.145471 -> hsa:5601( MAPK9 , cytoplasm ) - 5.390596 -> hsa:122953( JDP2 , nucleus )                                     | 7 | 34.781694 |
| hsa:9241( NOG , extracellular ) - 103.646450 -> hsa:655( BMP7 , extracellular ) - 65.460916 -> hsa:658( BMPR1B , cytoplasm ) - 2.524005 -> hsa:9459( ARHGEF6 , cytoplasm ) - 29.522727 -> hsa:998( CDC42 , cytoplasm ) - 2.145471 -> hsa:5599( MAPK8 , cytoplasm ) - 5.390596 -> hsa:3726( JUNB , nucleus )                                       | 7 | 34.781694 |
| hsa:9241( NOG , extracellular ) - 103.646450 -> hsa:655( BMP7 , extracellular ) - 65.460916 -> hsa:658( BMPR1B , cytoplasm ) - 2.524005 -> hsa:9459( ARHGEF6 , cytoplasm ) - 29.522727 -> hsa:998( CDC42 , cytoplasm ) - 2.145471 -> hsa:5599( MAPK8 , cytoplasm ) - 5.390596 -> hsa:3727( JUND , nucleus )                                       | 7 | 34.781694 |
| hsa:9241( NOG , extracellular ) - 103.646450 -> hsa:655( BMP7 , extracellular ) - 65.460916 -> hsa:658( BMPR1B , cytoplasm ) - 2.524005 -> hsa:9459( ARHGEF6 , cytoplasm ) - 29.522727 -> hsa:998( CDC42 , cytoplasm ) - 2.145471 -> hsa:5601( MAPK9 , cytoplasm ) - 5.390596 -> hsa:3727( JUND , nucleus )                                       | 7 | 34.781694 |
| hsa:9241( NOG , extracellular ) - 103.646450 -> hsa:655( BMP7 , extracellular ) - 65.460916 -> hsa:658( BMPR1B , cytoplasm ) - 2.524005 -> hsa:9459( ARHGEF6 , cytoplasm ) - 29.522727 -> hsa:998( CDC42 , cytoplasm ) - 2.145471 -> hsa:5601( MAPK9 , cytoplasm ) - 5.390596 -> hsa:3727( JUND , nucleus )                                       | 7 | 34.781694 |

|                                                                                                                                                                                                                                                                                                                                                            |   |           |
|------------------------------------------------------------------------------------------------------------------------------------------------------------------------------------------------------------------------------------------------------------------------------------------------------------------------------------------------------------|---|-----------|
| cytoplasm) - 2.524005 -> hsa:9459( ARHGEF6 , cytoplasm ) - 29.522727 -> hsa:998( CDC42 , cytoplasm ) - 2.145471<br>-> hsa:5599( MAPK8 , cytoplasm ) - 5.390596 -> hsa:3725( JUN , nucleus )                                                                                                                                                                |   |           |
| hsa:9241( NOG , extracellular ) - 103.646450 -> hsa:655( BMP7 , extracellular ) - 65.460916 -> hsa:658( BMPR1B , cytoplasm ) - 2.524005 -> hsa:9459( ARHGEF6 , cytoplasm ) - 29.522727 -> hsa:998( CDC42 , cytoplasm ) - 2.145471<br>-> hsa:5601( MAPK9 , cytoplasm ) - 5.390596 -> hsa:3725( JUN , nucleus )                                              | 7 | 34.781694 |
| hsa:9241( NOG , extracellular ) - 103.646450 -> hsa:655( BMP7 , extracellular ) - 65.460916 -> hsa:90( ACVR1 , cytoplasm ) - 2.071011 -> hsa:1123( CHN1 , cytoplasm ) - 33.843739 -> hsa:5879( RAC1 , golgi ) - 15.788264 -> hsa:5058( PAK1 , cytoplasm ) - 3.913667 -> hsa:207( AKT1 , cytoplasm ) - 18.468916 -> hsa:3064( HD , nucleus )                | 8 | 34.741852 |
| hsa:9241( NOG , extracellular ) - 103.646450 -> hsa:655( BMP7 , extracellular ) - 65.460916 -> hsa:658( BMPR1B , cytoplasm ) - 2.524005 -> hsa:9459( ARHGEF6 , cytoplasm ) - 29.522727 -> hsa:998( CDC42 , cytoplasm ) - 2.145471<br>-> hsa:5599( MAPK8 , cytoplasm ) - 4.410487 -> hsa:1026( CDKN1A , nucleus )                                           | 7 | 34.618343 |
| hsa:9241( NOG , extracellular ) - 103.646450 -> hsa:655( BMP7 , extracellular ) - 65.460916 -> hsa:658( BMPR1B , cytoplasm ) - 2.524005 -> hsa:9459( ARHGEF6 , cytoplasm ) - 29.522727 -> hsa:998( CDC42 , cytoplasm ) - 2.145471<br>-> hsa:5599( MAPK8 , cytoplasm ) - 4.410487 -> hsa:5468( PPARC , nucleus )                                            | 7 | 34.618343 |
| hsa:9241( NOG , extracellular ) - 103.646450 -> hsa:655( BMP7 , extracellular ) - 65.460916 -> hsa:658( BMPR1B , cytoplasm ) - 2.524005 -> hsa:9459( ARHGEF6 , cytoplasm ) - 29.522727 -> hsa:998( CDC42 , cytoplasm ) - 2.145471<br>-> hsa:5590( PRKCZ , cytoplasm ) - 4.410487 -> hsa:4691( NCL , nucleus )                                              | 7 | 34.618343 |
| hsa:9241( NOG , extracellular ) - 103.646450 -> hsa:655( BMP7 , extracellular ) - 65.460916 -> hsa:658( BMPR1B , cytoplasm ) - 2.524005 -> hsa:9459( ARHGEF6 , cytoplasm ) - 29.522727 -> hsa:998( CDC42 , cytoplasm ) - 2.145471<br>-> hsa:5599( MAPK8 , cytoplasm ) - 4.410487 -> hsa:2908( NR3C1 , nucleus )                                            | 7 | 34.618343 |
| hsa:9241( NOG , extracellular ) - 103.646450 -> hsa:655( BMP7 , extracellular ) - 65.460916 -> hsa:658( BMPR1B , cytoplasm ) - 2.524005 -> hsa:9459( ARHGEF6 , cytoplasm ) - 29.522727 -> hsa:998( CDC42 , cytoplasm ) - 2.145471<br>-> hsa:5599( MAPK8 , cytoplasm ) - 4.211403 -> hsa:1386( ATF2 , nucleus )                                             | 7 | 34.585162 |
| hsa:9241( NOG , extracellular ) - 103.646450 -> hsa:655( BMP7 , extracellular ) - 65.460916 -> hsa:658( BMPR1B , cytoplasm ) - 2.524005 -> hsa:9459( ARHGEF6 , cytoplasm ) - 29.522727 -> hsa:998( CDC42 , cytoplasm ) - 2.145471<br>-> hsa:5601( MAPK9 , cytoplasm ) - 4.211403 -> hsa:1386( ATF2 , nucleus )                                             | 7 | 34.585162 |
| hsa:9241( NOG , extracellular ) - 103.646450 -> hsa:650( BMP2 , extracellular ) - 65.460916 -> hsa:658( BMPR1B , cytoplasm ) - 2.524005 -> hsa:9459( ARHGEF6 , cytoplasm ) - 29.522727 -> hsa:998( CDC42 , cytoplasm ) - 15.788264<br>-> hsa:5058( PAK1 , cytoplasm ) - 7.217161 -> hsa:90( ACVR1 , cytoplasm ) - 17.330023 -> hsa:4090( SMAD5 , nucleus ) | 8 | 34.498507 |
| hsa:9241( NOG , extracellular ) - 103.646450 -> hsa:655( BMP7 , extracellular ) - 65.460916 -> hsa:658( BMPR1B , cytoplasm ) - 2.524005 -> hsa:9459( ARHGEF6 , cytoplasm ) - 29.522727 -> hsa:998( CDC42 , cytoplasm ) - 2.145471<br>-> hsa:5599( MAPK8 , cytoplasm ) - 2.205244 -> hsa:5966( REL , nucleus )                                              | 7 | 34.250802 |
| hsa:9241( NOG , extracellular ) - 103.646450 -> hsa:655( BMP7 , extracellular ) - 65.460916 -> hsa:658( BMPR1B , cytoplasm ) - 2.524005 -> hsa:9459( ARHGEF6 , cytoplasm ) - 29.522727 -> hsa:998( CDC42 , cytoplasm ) - 2.145471<br>-> hsa:5601( MAPK9 , cytoplasm ) - 2.205244 -> hsa:4775( NFATC3 , nucleus )                                           | 7 | 34.250802 |
| hsa:9241( NOG , extracellular ) - 103.646450 -> hsa:655( BMP7 , extracellular ) - 65.460916 -> hsa:658( BMPR1B , cytoplasm ) - 2.524005 -> hsa:9459( ARHGEF6 , cytoplasm ) - 29.522727 -> hsa:998( CDC42 , cytoplasm ) - 2.145471<br>-> hsa:5590( PRKCZ , cytoplasm ) - 2.205244 -> hsa:4773( NFATC2 , nucleus )                                           | 7 | 34.250802 |
| hsa:9241( NOG , extracellular ) - 103.646450 -> hsa:655( BMP7 , extracellular ) - 65.460916 -> hsa:658( BMPR1B , cytoplasm ) - 2.524005 -> hsa:9459( ARHGEF6 , cytoplasm ) - 29.522727 -> hsa:998( CDC42 , cytoplasm ) - 2.145471<br>-> hsa:5610( EIF2AK2 , nucleus ) - 2.071011 -> hsa:6772( STAT1 , nucleus )                                            | 7 | 34.22843  |
| hsa:9241( NOG , extracellular ) - 103.646450 -> hsa:655( BMP7 , extracellular ) - 65.460916 -> hsa:658( BMPR1B , cytoplasm ) - 2.524005 -> hsa:9459( ARHGEF6 , cytoplasm ) - 29.522727 -> hsa:998( CDC42 , cytoplasm ) - 15.788264<br>-> hsa:5058( PAK1 , cytoplasm ) - 3.913667 -> hsa:207( AKT1 , cytoplasm ) - 18.468916 -> hsa:3064( HD , nucleus )    | 8 | 34.189278 |

|                                                                                                                                                                                                                                                                                                                                                           |   |           |
|-----------------------------------------------------------------------------------------------------------------------------------------------------------------------------------------------------------------------------------------------------------------------------------------------------------------------------------------------------------|---|-----------|
| hsa:9241( NOG , extracellular ) - 103.646450 -> hsa:655( BMP7 , extracellular ) - 65.460916 -> hsa:90( ACVR1 , cytoplasm ) - 2.071011 -> hsa:1123( CHN1 , cytoplasm ) - 33.843739 -> hsa:5879( RAC1 , golgi ) - 15.788264 ->                                                                                                                              | 8 | 33.835502 |
| hsa:5058( PAK1 , cytoplasm ) - 7.217161 -> hsa:9641( IKBKE , cytoplasm ) - 8.820974 -> hsa:10291( SF3A1 , nucleus )                                                                                                                                                                                                                                       |   |           |
| hsa:9241( NOG , extracellular ) - 103.646450 -> hsa:655( BMP7 , extracellular ) - 65.460916 -> hsa:90( ACVR1 , cytoplasm ) - 2.071011 -> hsa:1123( CHN1 , cytoplasm ) - 33.843739 -> hsa:5879( RAC1 , golgi ) - 15.788264 ->                                                                                                                              | 8 | 33.345448 |
| hsa:5058( PAK1 , cytoplasm ) - 7.217161 -> hsa:5594( MAPK1 , cytoplasm ) - 5.390596 -> hsa:2353( FOS , nucleus )                                                                                                                                                                                                                                          |   |           |
| hsa:9241( NOG , extracellular ) - 103.646450 -> hsa:655( BMP7 , extracellular ) - 65.460916 -> hsa:658( BMPR1B , cytoplasm ) - 2.524005 -> hsa:9459( ARHGEF6 , cytoplasm ) - 29.522727 -> hsa:998( CDC42 , cytoplasm ) - 15.788264 -> hsa:5058( PAK1 , cytoplasm ) - 2.738090 -> hsa:5580( PRKCD , cytoplasm ) - 13.231462 -> hsa:5591( PRKDC , nucleus ) | 8 | 33.273131 |
| hsa:9241( NOG , extracellular ) - 103.646450 -> hsa:655( BMP7 , extracellular ) - 65.460916 -> hsa:90( ACVR1 , cytoplasm ) - 2.071011 -> hsa:1123( CHN1 , cytoplasm ) - 33.843739 -> hsa:5879( RAC1 , golgi ) - 15.788264 ->                                                                                                                              | 8 | 33.205433 |
| hsa:5062( PAK2 , cytoplasm ) - 7.217161 -> hsa:5594( MAPK1 , cytoplasm ) - 4.410487 -> hsa:5465( PPARA , nucleus )                                                                                                                                                                                                                                        |   |           |
| hsa:9241( NOG , extracellular ) - 103.646450 -> hsa:655( BMP7 , extracellular ) - 65.460916 -> hsa:90( ACVR1 , cytoplasm ) - 2.071011 -> hsa:1123( CHN1 , cytoplasm ) - 33.843739 -> hsa:5879( RAC1 , golgi ) - 15.788264 ->                                                                                                                              | 8 | 33.205433 |
| hsa:5058( PAK1 , cytoplasm ) - 7.217161 -> hsa:9641( IKBKE , cytoplasm ) - 4.410487 -> hsa:3187( HNRPH1 , nucleus )                                                                                                                                                                                                                                       |   |           |
| hsa:9241( NOG , extracellular ) - 103.646450 -> hsa:655( BMP7 , extracellular ) - 65.460916 -> hsa:90( ACVR1 , cytoplasm ) - 2.071011 -> hsa:1123( CHN1 , cytoplasm ) - 33.843739 -> hsa:5879( RAC1 , golgi ) - 15.788264 ->                                                                                                                              | 8 | 33.205433 |
| hsa:5058( PAK1 , cytoplasm ) - 7.217161 -> hsa:9641( IKBKE , cytoplasm ) - 4.410487 -> hsa:10642( IGF2BP1 , nucleus )                                                                                                                                                                                                                                     |   |           |
| hsa:9241( NOG , extracellular ) - 103.646450 -> hsa:655( BMP7 , extracellular ) - 65.460916 -> hsa:90( ACVR1 , cytoplasm ) - 2.071011 -> hsa:1123( CHN1 , cytoplasm ) - 33.843739 -> hsa:5879( RAC1 , golgi ) - 15.788264 ->                                                                                                                              | 8 | 33.205433 |
| hsa:5058( PAK1 , cytoplasm ) - 7.217161 -> hsa:984( CDC2L1 , cytoplasm ) - 4.410487 -> hsa:10921( RNPS1 , nucleus )                                                                                                                                                                                                                                       |   |           |
| hsa:9241( NOG , extracellular ) - 103.646450 -> hsa:655( BMP7 , extracellular ) - 65.460916 -> hsa:90( ACVR1 , cytoplasm ) - 2.071011 -> hsa:1123( CHN1 , cytoplasm ) - 33.843739 -> hsa:5879( RAC1 , golgi ) - 15.788264 ->                                                                                                                              | 8 | 33.173238 |
| hsa:5062( PAK2 , cytoplasm ) - 2.206641 -> hsa:6714( SRC , cytoplasm ) - 9.195643 -> hsa:2909( GRLF1 , nucleus )                                                                                                                                                                                                                                          |   |           |
| hsa:9241( NOG , extracellular ) - 103.646450 -> hsa:655( BMP7 , extracellular ) - 65.460916 -> hsa:90( ACVR1 , cytoplasm ) - 2.071011 -> hsa:1123( CHN1 , cytoplasm ) - 33.843739 -> hsa:5879( RAC1 , golgi ) - 15.788264 ->                                                                                                                              | 8 | 33.090874 |
| hsa:5058( PAK1 , cytoplasm ) - 7.217161 -> hsa:9641( IKBKE , cytoplasm ) - 3.608580 -> hsa:2273( FHL1 , nucleus )                                                                                                                                                                                                                                         |   |           |
| hsa:9241( NOG , extracellular ) - 103.646450 -> hsa:655( BMP7 , extracellular ) - 65.460916 -> hsa:90( ACVR1 , cytoplasm ) - 2.071011 -> hsa:1123( CHN1 , cytoplasm ) - 33.843739 -> hsa:5879( RAC1 , golgi ) - 15.788264 ->                                                                                                                              | 8 | 33.008536 |
| hsa:5058( PAK1 , cytoplasm ) - 7.217161 -> hsa:7046( TGFBR1 , cytoplasm ) - 3.032210 -> hsa:130497( OSR1 , nucleus )                                                                                                                                                                                                                                      |   |           |
| hsa:9241( NOG , extracellular ) - 103.646450 -> hsa:655( BMP7 , extracellular ) - 65.460916 -> hsa:90( ACVR1 , cytoplasm ) - 2.071011 -> hsa:1123( CHN1 , cytoplasm ) - 33.843739 -> hsa:5879( RAC1 , golgi ) - 15.788264 ->                                                                                                                              | 8 | 33.008536 |
| hsa:5058( PAK1 , cytoplasm ) - 7.217161 -> hsa:7048( TGFBR2 , cytoplasm ) - 3.032210 -> hsa:130497( OSR1 , nucleus )                                                                                                                                                                                                                                      |   |           |
| hsa:9241( NOG , extracellular ) - 103.646450 -> hsa:655( BMP7 , extracellular ) - 65.460916 -> hsa:90( ACVR1 , cytoplasm ) - 2.071011 -> hsa:1123( CHN1 , cytoplasm ) - 33.843739 -> hsa:5879( RAC1 , golgi ) - 15.788264 ->                                                                                                                              | 8 | 33.008536 |
| hsa:5058( PAK1 , cytoplasm ) - 7.217161 -> hsa:1457( CSNK2A1 , cytoplasm ) - 3.032210 -> hsa:10661( KLF1 , nucleus )                                                                                                                                                                                                                                      |   |           |
| hsa:9241( NOG , extracellular ) - 103.646450 -> hsa:655( BMP7 , extracellular ) - 65.460916 -> hsa:90( ACVR1 , cytoplasm ) - 2.071011 -> hsa:1123( CHN1 , cytoplasm ) - 33.843739 -> hsa:5879( RAC1 , golgi ) - 15.788264 ->                                                                                                                              | 8 | 32.890398 |
| hsa:5058( PAK1 , cytoplasm ) - 7.217161 -> hsa:7048( TGFBR2 , cytoplasm ) - 2.205244 -> hsa:9133( CCNB2 , nucleus )                                                                                                                                                                                                                                       |   |           |
| hsa:9241( NOG , extracellular ) - 103.646450 -> hsa:655( BMP7 , extracellular ) - 65.460916 -> hsa:90( ACVR1 , cytoplasm ) - 2.071011 -> hsa:1123( CHN1 , cytoplasm ) - 33.843739 -> hsa:5879( RAC1 , golgi ) - 15.788264 ->                                                                                                                              | 8 | 32.890398 |
| hsa:5058( PAK1 , cytoplasm ) - 7.217161 -> hsa:984( CDC2L1 , cytoplasm ) - 2.205244 -> hsa:81669( CCNL2 , nucleus )                                                                                                                                                                                                                                       |   |           |
| hsa:9241( NOG , extracellular ) - 103.646450 -> hsa:655( BMP7 , extracellular ) - 65.460916 -> hsa:90( ACVR1 , cytoplasm ) - 2.071011 -> hsa:1123( CHN1 , cytoplasm ) - 33.843739 -> hsa:5879( RAC1 , golgi ) - 15.788264 ->                                                                                                                              | 8 | 32.87352  |





|                                                                                                                                                                                                                                                                                                                                                                                                        |   |           |
|--------------------------------------------------------------------------------------------------------------------------------------------------------------------------------------------------------------------------------------------------------------------------------------------------------------------------------------------------------------------------------------------------------|---|-----------|
| cytoplasm ) - 2.524005 -> hsa:9459( ARHGEF6 , cytoplasm ) - 29.522727 -> hsa:998( CDC42 , cytoplasm ) - 15.788264<br>-> hsa:5058( PAK1 , cytoplasm ) - 7.217161 -> hsa:9641( IKBKE , cytoplasm ) - 4.410487 -> hsa:6741( SSB , nucleus )                                                                                                                                                               |   |           |
| hsa:9241( NOG , extracellular ) - 103.646450 -> hsa:655( BMP7 , extracellular ) - 65.460916 -> hsa:658( BMPR1B , cytoplasm ) - 2.524005 -> hsa:9459( ARHGEF6 , cytoplasm ) - 29.522727 -> hsa:998( CDC42 , cytoplasm ) - 15.788264<br>-> hsa:5062( PAK2 , cytoplasm ) - 2.206641 -> hsa:6714( SRC , cytoplasm ) - 9.195643 -> hsa:2909( GRLF1 , nucleus )                                              | 8 | 32.620664 |
| hsa:9241( NOG , extracellular ) - 103.646450 -> hsa:655( BMP7 , extracellular ) - 65.460916 -> hsa:658( BMPR1B , cytoplasm ) - 2.524005 -> hsa:9459( ARHGEF6 , cytoplasm ) - 29.522727 -> hsa:998( CDC42 , cytoplasm ) - 15.788264<br>-> hsa:5058( PAK1 , cytoplasm ) - 7.217161 -> hsa:9641( IKBKE , cytoplasm ) - 3.608580 -> hsa:2273( FHL1 , nucleus )                                             | 8 | 32.5383   |
| hsa:9241( NOG , extracellular ) - 103.646450 -> hsa:655( BMP7 , extracellular ) - 65.460916 -> hsa:658( BMPR1B , cytoplasm ) - 2.524005 -> hsa:9459( ARHGEF6 , cytoplasm ) - 29.522727 -> hsa:998( CDC42 , cytoplasm ) - 15.788264<br>-> hsa:5062( PAK2 , cytoplasm ) - 7.217161 -> hsa:5595( MAPK3 , nucleus ) - 3.320395 -> hsa:7553( ZNF7 , nucleus )                                               | 8 | 32.497131 |
| hsa:9241( NOG , extracellular ) - 103.646450 -> hsa:655( BMP7 , extracellular ) - 65.460916 -> hsa:658( BMPR1B , cytoplasm ) - 2.524005 -> hsa:9459( ARHGEF6 , cytoplasm ) - 29.522727 -> hsa:998( CDC42 , cytoplasm ) - 15.788264<br>-> hsa:5058( PAK1 , cytoplasm ) - 7.217161 -> hsa:984( CDC2L1 , cytoplasm ) - 3.307866 -> hsa:896( CCND3 , nucleus )                                             | 8 | 32.495341 |
| hsa:9241( NOG , extracellular ) - 103.646450 -> hsa:655( BMP7 , extracellular ) - 65.460916 -> hsa:658( BMPR1B , cytoplasm ) - 2.524005 -> hsa:9459( ARHGEF6 , cytoplasm ) - 29.522727 -> hsa:998( CDC42 , cytoplasm ) - 15.788264<br>-> hsa:5062( PAK2 , cytoplasm ) - 7.217161 -> hsa:5594( MAPK1 , cytoplasm ) - 3.032210 -> hsa:8462( KLF11 , nucleus )                                            | 8 | 32.455962 |
| hsa:9241( NOG , extracellular ) - 103.646450 -> hsa:655( BMP7 , extracellular ) - 65.460916 -> hsa:658( BMPR1B , cytoplasm ) - 2.524005 -> hsa:9459( ARHGEF6 , cytoplasm ) - 29.522727 -> hsa:998( CDC42 , cytoplasm ) - 15.788264<br>-> hsa:5058( PAK1 , cytoplasm ) - 7.217161 -> hsa:1020( CDK5 , cytoplasm ) - 2.940325 -> hsa:894( CCND2 , nucleus )                                              | 8 | 32.442835 |
| hsa:9241( NOG , extracellular ) - 103.646450 -> hsa:655( BMP7 , extracellular ) - 65.460916 -> hsa:658( BMPR1B , cytoplasm ) - 2.524005 -> hsa:9459( ARHGEF6 , cytoplasm ) - 29.522727 -> hsa:998( CDC42 , cytoplasm ) - 43.073849<br>-> hsa:7454( WAS , cytoplasm ) - 7.217161 -> hsa:1457( CSNK2A1 , cytoplasm ) - 3.320395 -> hsa:4150( MAZ , nucleus )<br>- 4.506367 -> hsa:2186( BPTF , nucleus ) | 9 | 32.408984 |
| hsa:9241( NOG , extracellular ) - 103.646450 -> hsa:655( BMP7 , extracellular ) - 65.460916 -> hsa:90( ACVR1 , cytoplasm ) - 8.820974 -> hsa:3551( IKBKB , cytoplasm ) - 2.619811 -> hsa:55620( STAP2 , cytoplasm ) - 8.141027<br>-> hsa:6774( STAT3 , nucleus ) - 5.627464 -> hsa:7707( ZNF148 , nucleus )                                                                                            | 7 | 32.386107 |
| hsa:9241( NOG , extracellular ) - 103.646450 -> hsa:655( BMP7 , extracellular ) - 65.460916 -> hsa:658( BMPR1B , cytoplasm ) - 2.524005 -> hsa:9459( ARHGEF6 , cytoplasm ) - 29.522727 -> hsa:998( CDC42 , cytoplasm ) - 15.788264<br>-> hsa:5062( PAK2 , cytoplasm ) - 7.217161 -> hsa:5594( MAPK1 , cytoplasm ) - 2.520278 -> hsa:8202( NCOA3 , nucleus )                                            | 8 | 32.382829 |
| hsa:9241( NOG , extracellular ) - 103.646450 -> hsa:655( BMP7 , extracellular ) - 65.460916 -> hsa:658( BMPR1B , cytoplasm ) - 2.524005 -> hsa:9459( ARHGEF6 , cytoplasm ) - 29.522727 -> hsa:998( CDC42 , cytoplasm ) - 15.788264<br>-> hsa:5062( PAK2 , cytoplasm ) - 7.217161 -> hsa:5594( MAPK1 , cytoplasm ) - 2.520278 -> hsa:8648( NCOA1 , nucleus )                                            | 8 | 32.382829 |
| hsa:9241( NOG , extracellular ) - 103.646450 -> hsa:655( BMP7 , extracellular ) - 65.460916 -> hsa:658( BMPR1B , cytoplasm ) - 2.524005 -> hsa:9459( ARHGEF6 , cytoplasm ) - 29.522727 -> hsa:998( CDC42 , cytoplasm ) - 15.788264<br>-> hsa:5062( PAK2 , cytoplasm ) - 7.217161 -> hsa:5595( MAPK3 , nucleus ) - 2.520278 -> hsa:3091( HIF1A , nucleus )                                              | 8 | 32.382829 |
| hsa:9241( NOG , extracellular ) - 103.646450 -> hsa:655( BMP7 , extracellular ) - 65.460916 -> hsa:658( BMPR1B , cytoplasm ) - 2.524005 -> hsa:9459( ARHGEF6 , cytoplasm ) - 29.522727 -> hsa:998( CDC42 , cytoplasm ) - 15.788264<br>-> hsa:5058( PAK1 , cytoplasm ) - 7.217161 -> hsa:7048( TGFBR2 , cytoplasm ) - 2.205244 -> hsa:9133( CCNB2 , nucleus )                                           | 8 | 32.337824 |
| hsa:9241( NOG , extracellular ) - 103.646450 -> hsa:655( BMP7 , extracellular ) - 65.460916 -> hsa:658( BMPR1B , cytoplasm ) - 2.524005 -> hsa:9459( ARHGEF6 , cytoplasm ) - 29.522727 -> hsa:998( CDC42 , cytoplasm ) - 15.788264<br>-> hsa:5058( PAK1 , cytoplasm ) - 7.217161 -> hsa:7048( TGFBR2 , cytoplasm ) - 2.205244 -> hsa:891( CCNB1 , nucleus )                                            | 8 | 32.337824 |
| hsa:9241( NOG , extracellular ) - 103.646450 -> hsa:655( BMP7 , extracellular ) - 65.460916 -> hsa:658( BMPR1B , cytoplasm ) - 2.524005 -> hsa:9459( ARHGEF6 , cytoplasm ) - 29.522727 -> hsa:998( CDC42 , cytoplasm ) - 15.788264                                                                                                                                                                     | 8 | 32.337824 |

|                                                                                                                                                                                                                                                                                                                                                  |   |           |
|--------------------------------------------------------------------------------------------------------------------------------------------------------------------------------------------------------------------------------------------------------------------------------------------------------------------------------------------------|---|-----------|
| -> hsa:5058( PAK1 , cytoplasm ) - 7.217161 -> hsa:1020( CDK5 , cytoplasm ) - 2.205244 -> hsa:91768( CABLES1 , nucleus )                                                                                                                                                                                                                          |   |           |
| hsa:9241( NOG , extracellular ) - 103.646450 -> hsa:655( BMP7 , extracellular ) - 65.460916 -> hsa:658( BMPR1B , cytoplasm ) - 2.524005 -> hsa:9459( ARHGEF6 , cytoplasm ) - 29.522727 -> hsa:998( CDC42 , cytoplasm ) - 15.788264                                                                                                               | 8 | 32.337824 |
| -> hsa:5058( PAK1 , cytoplasm ) - 7.217161 -> hsa:1020( CDK5 , cytoplasm ) - 2.205244 -> hsa:81928( CABLES2 , nucleus )                                                                                                                                                                                                                          |   |           |
| hsa:9241( NOG , extracellular ) - 103.646450 -> hsa:655( BMP7 , extracellular ) - 65.460916 -> hsa:658( BMPR1B , cytoplasm ) - 2.524005 -> hsa:9459( ARHGEF6 , cytoplasm ) - 29.522727 -> hsa:998( CDC42 , cytoplasm ) - 15.788264                                                                                                               | 8 | 32.337824 |
| -> hsa:5058( PAK1 , cytoplasm ) - 7.217161 -> hsa:1020( CDK5 , cytoplasm ) - 2.205244 -> hsa:900( CCNG1 , nucleus )                                                                                                                                                                                                                              |   |           |
| hsa:9241( NOG , extracellular ) - 103.646450 -> hsa:655( BMP7 , extracellular ) - 65.460916 -> hsa:658( BMPR1B , cytoplasm ) - 2.524005 -> hsa:9459( ARHGEF6 , cytoplasm ) - 29.522727 -> hsa:998( CDC42 , cytoplasm ) - 15.788264                                                                                                               | 8 | 32.337824 |
| -> hsa:5058( PAK1 , cytoplasm ) - 7.217161 -> hsa:984( CDC2L1 , cytoplasm ) - 2.205244 -> hsa:81669( CCNL2 , nucleus )                                                                                                                                                                                                                           |   |           |
| hsa:9241( NOG , extracellular ) - 103.646450 -> hsa:655( BMP7 , extracellular ) - 65.460916 -> hsa:658( BMPR1B , cytoplasm ) - 2.524005 -> hsa:9459( ARHGEF6 , cytoplasm ) - 29.522727 -> hsa:998( CDC42 , cytoplasm ) - 15.788264                                                                                                               | 8 | 32.320946 |
| -> hsa:5058( PAK1 , cytoplasm ) - 3.913667 -> hsa:207( AKT1 , cytoplasm ) - 5.390596 -> hsa:1385( CREB1 , nucleus )                                                                                                                                                                                                                              |   |           |
| hsa:9241( NOG , extracellular ) - 103.646450 -> hsa:655( BMP7 , extracellular ) - 65.460916 -> hsa:658( BMPR1B , cytoplasm ) - 2.524005 -> hsa:9459( ARHGEF6 , cytoplasm ) - 29.522727 -> hsa:998( CDC42 , cytoplasm ) - 15.788264                                                                                                               | 8 | 32.313291 |
| -> hsa:5058( PAK1 , cytoplasm ) - 3.913667 -> hsa:207( AKT1 , cytoplasm ) - 5.337007 -> hsa:79026( AHNAK , nucleus )                                                                                                                                                                                                                             |   |           |
| hsa:9241( NOG , extracellular ) - 103.646450 -> hsa:655( BMP7 , extracellular ) - 65.460916 -> hsa:658( BMPR1B , cytoplasm ) - 2.524005 -> hsa:9459( ARHGEF6 , cytoplasm ) - 29.522727 -> hsa:998( CDC42 , cytoplasm ) - 15.788264                                                                                                               | 8 | 32.153007 |
| -> hsa:5058( PAK1 , cytoplasm ) - 2.738090 -> hsa:5580( PRKCD , cytoplasm ) - 5.390596 -> hsa:4780( NFE2L2 , nucleus )                                                                                                                                                                                                                           |   |           |
| hsa:9241( NOG , extracellular ) - 103.646450 -> hsa:655( BMP7 , extracellular ) - 65.460916 -> hsa:658( BMPR1B , cytoplasm ) - 2.524005 -> hsa:9459( ARHGEF6 , cytoplasm ) - 29.522727 -> hsa:998( CDC42 , cytoplasm ) - 15.788264                                                                                                               | 8 | 32.012991 |
| -> hsa:5058( PAK1 , cytoplasm ) - 2.738090 -> hsa:5580( PRKCD , cytoplasm ) - 4.410487 -> hsa:2101( ESRRA , nucleus )                                                                                                                                                                                                                            |   |           |
| hsa:9241( NOG , extracellular ) - 103.646450 -> hsa:655( BMP7 , extracellular ) - 65.460916 -> hsa:658( BMPR1B , cytoplasm ) - 2.524005 -> hsa:9459( ARHGEF6 , cytoplasm ) - 29.522727 -> hsa:998( CDC42 , cytoplasm ) - 15.788264                                                                                                               | 8 | 31.93707  |
| -> hsa:5062( PAK2 , cytoplasm ) - 2.206641 -> hsa:6714( SRC , cytoplasm ) - 4.410487 -> hsa:5241( PGR , nucleus )                                                                                                                                                                                                                                |   |           |
| hsa:9241( NOG , extracellular ) - 103.646450 -> hsa:655( BMP7 , extracellular ) - 65.460916 -> hsa:658( BMPR1B , cytoplasm ) - 2.524005 -> hsa:9459( ARHGEF6 , cytoplasm ) - 29.522727 -> hsa:998( CDC42 , cytoplasm ) - 15.788264                                                                                                               | 8 | 31.816095 |
| -> hsa:5058( PAK1 , cytoplasm ) - 2.738090 -> hsa:5580( PRKCD , cytoplasm ) - 3.032210 -> hsa:688( KLF5 , nucleus )                                                                                                                                                                                                                              |   |           |
| hsa:9241( NOG , extracellular ) - 103.646450 -> hsa:655( BMP7 , extracellular ) - 65.460916 -> hsa:658( BMPR1B , cytoplasm ) - 2.071011 -> hsa:1123( CHN1 , cytoplasm ) - 33.843739 -> hsa:5879( RAC1 , golgi ) - 2.145471 -> hsa:5610( EIF2AK2 , nucleus ) - 2.071011 -> hsa:6774( STAT3 , nucleus ) - 5.627464 -> hsa:7707( ZNF148 , nucleus ) | 8 | 30.695152 |
| hsa:7066( THPO , extracellular ) - 79.866096 -> hsa:4352( MPL , extracellular ) - 2.640565 -> hsa:3717( JAK2 , cytoplasm ) - 9.046825 -> hsa:6772( STAT1 , nucleus )                                                                                                                                                                             | 4 | 30.517829 |
| hsa:9241( NOG , extracellular ) - 103.646450 -> hsa:655( BMP7 , extracellular ) - 65.460916 -> hsa:658( BMPR1B , cytoplasm ) - 2.524005 -> hsa:9459( ARHGEF6 , cytoplasm ) - 12.338863 -> hsa:28964( GIT1 , cytoplasm ) - 19.664149                                                                                                              | 9 | 30.473956 |
| -> hsa:580( BARD1 , nucleus ) - 2.288050 -> hsa:983( CDC2 , nucleus ) - 3.320395 -> hsa:7704( ZBTB16 , nucleus ) - 34.548817 -> hsa:7572( ZNF24 , nucleus )                                                                                                                                                                                      |   |           |
| hsa:2056( EPO , extracellular ) - 79.866096 -> hsa:2057( EPOR , extracellular ) - 2.640565 -> hsa:6850( SYK , cytoplasm ) - 8.820974 -> hsa:7314( UBB , nucleus )                                                                                                                                                                                | 4 | 30.442545 |
| hsa:9241( NOG , extracellular ) - 103.646450 -> hsa:650( BMP2 , extracellular ) - 65.460916 -> hsa:658( BMPR1B , cytoplasm ) - 2.524005 -> hsa:9459( ARHGEF6 , cytoplasm ) - 12.338863 -> hsa:28964( GIT1 , cytoplasm ) - 19.664149                                                                                                              | 8 | 30.04756  |
| -> hsa:580( BARD1 , nucleus ) - 2.288050 -> hsa:983( CDC2 , nucleus ) - 4.410487 -> hsa:1026( CDKN1A , nucleus )                                                                                                                                                                                                                                 |   |           |
| hsa:9241( NOG , extracellular ) - 103.646450 -> hsa:655( BMP7 , extracellular ) - 65.460916 -> hsa:658( BMPR1B , cytoplasm ) - 2.524005 -> hsa:9459( ARHGEF6 , cytoplasm ) - 12.338863 -> hsa:28964( GIT1 , cytoplasm ) - 19.664149                                                                                                              | 8 | 29.732525 |

|                                                                                                                                                                                                                                                                                                                                                                                                                                             |    |           |
|---------------------------------------------------------------------------------------------------------------------------------------------------------------------------------------------------------------------------------------------------------------------------------------------------------------------------------------------------------------------------------------------------------------------------------------------|----|-----------|
| -> hsa:580( BARD1 , nucleus ) - 2.288050 -> hsa:983( CDC2 , nucleus ) - 2.205244 -> hsa:8900( CCNA1 , nucleus )                                                                                                                                                                                                                                                                                                                             |    |           |
| hsa:9241( NOG , extracellular ) - 103.646450 -> hsa:655( BMP7 , extracellular ) - 65.460916 -> hsa:658( BMPR1B , cytoplasm ) - 2.524005 -> hsa:9459( ARHGEF6 , cytoplasm ) - 12.338863 -> hsa:28964( GIT1 , cytoplasm ) - 19.664149                                                                                                                                                                                                         | 8  | 29.732525 |
| -> hsa:580( BARD1 , nucleus ) - 2.288050 -> hsa:983( CDC2 , nucleus ) - 2.205244 -> hsa:898( CCNE1 , nucleus )                                                                                                                                                                                                                                                                                                                              |    |           |
| hsa:9241( NOG , extracellular ) - 103.646450 -> hsa:655( BMP7 , extracellular ) - 65.460916 -> hsa:658( BMPR1B , cytoplasm ) - 2.524005 -> hsa:9459( ARHGEF6 , cytoplasm ) - 12.338863 -> hsa:28964( GIT1 , cytoplasm ) - 19.664149                                                                                                                                                                                                         | 8  | 29.732525 |
| -> hsa:580( BARD1 , nucleus ) - 2.288050 -> hsa:983( CDC2 , nucleus ) - 2.205244 -> hsa:890( CCNA2 , nucleus )                                                                                                                                                                                                                                                                                                                              |    |           |
| hsa:9241( NOG , extracellular ) - 103.646450 -> hsa:655( BMP7 , extracellular ) - 65.460916 -> hsa:90( ACVR1 , cytoplasm ) - 8.820974 -> hsa:3551( IKKBK , cytoplasm ) - 5.390596 -> hsa:8826( IQGAP1 , cytoplasm ) - 16.031245                                                                                                                                                                                                             | 8  | 29.415163 |
| -> hsa:998( CDC42 , cytoplasm ) - 2.145471 -> hsa:5578( PRKCA , cytoplasm ) - 4.410487 -> hsa:5914( RARA , nucleus )                                                                                                                                                                                                                                                                                                                        |    |           |
| hsa:9241( NOG , extracellular ) - 103.646450 -> hsa:655( BMP7 , extracellular ) - 65.460916 -> hsa:90( ACVR1 , cytoplasm ) - 8.820974 -> hsa:3551( IKKBK , cytoplasm ) - 5.390596 -> hsa:8826( IQGAP1 , cytoplasm ) - 16.031245                                                                                                                                                                                                             | 8  | 29.100128 |
| -> hsa:998( CDC42 , cytoplasm ) - 2.145471 -> hsa:5578( PRKCA , cytoplasm ) - 2.205244 -> hsa:4772( NFATC1 , nucleus )                                                                                                                                                                                                                                                                                                                      |    |           |
| hsa:9241( NOG , extracellular ) - 103.646450 -> hsa:655( BMP7 , extracellular ) - 65.460916 -> hsa:658( BMPR1B , cytoplasm ) - 2.524005 -> hsa:9459( ARHGEF6 , cytoplasm ) - 29.522727 -> hsa:998( CDC42 , cytoplasm ) - 15.788264                                                                                                                                                                                                          | 9  | 28.962263 |
| -> hsa:5062( PAK2 , cytoplasm ) - 7.217161 -> hsa:5595( MAPK3 , nucleus ) - 3.032210 -> hsa:6667( SPI , nucleus ) - 4.506367 -> hsa:1958( EGR1 , nucleus )                                                                                                                                                                                                                                                                                  |    |           |
| hsa:9241( NOG , extracellular ) - 103.646450 -> hsa:655( BMP7 , extracellular ) - 65.460916 -> hsa:658( BMPR1B , cytoplasm ) - 2.524005 -> hsa:9459( ARHGEF6 , cytoplasm ) - 12.338863 -> hsa:28964( GIT1 , cytoplasm ) - 19.664149                                                                                                                                                                                                         | 9  | 28.938534 |
| -> hsa:580( BARD1 , nucleus ) - 19.664149 -> hsa:672( BRCA1 , nucleus ) - 5.177529 -> hsa:4215( MAP3K3 , cytoplasm ) - 3.032210 -> hsa:26993( AKAP8L , nucleus )                                                                                                                                                                                                                                                                            |    |           |
| hsa:12( SERPINA3 , extracellular ) - 69.278180 -> hsa:4485( MST1 , extracellular ) - 3.247723 -> hsa:4486( MST1R , cytoplasm ) - 14.214998 -> hsa:5970( RELA , nucleus )                                                                                                                                                                                                                                                                    | 4  | 28.913634 |
| hsa:9241( NOG , extracellular ) - 103.646450 -> hsa:655( BMP7 , extracellular ) - 65.460916 -> hsa:658( BMPR1B , cytoplasm ) - 2.071011 -> hsa:1123( CHN1 , cytoplasm ) - 33.843739 -> hsa:5879( RAC1 , golgi ) - 15.788264 -> hsa:5058( PAK1 , cytoplasm ) - 2.460392 -> hsa:8874( ARHGEF7 , cytoplasm ) - 29.522727 -> hsa:998( CDC42 , cytoplasm ) - 2.145471 -> hsa:5601( MAPK9 , cytoplasm ) - 4.211403 -> hsa:11016( ATF7 , nucleus ) | 10 | 28.794486 |
| hsa:9241( NOG , extracellular ) - 103.646450 -> hsa:650( BMP2 , extracellular ) - 65.460916 -> hsa:90( ACVR1 , cytoplasm ) - 8.820974 -> hsa:3551( IKKBK , cytoplasm ) - 5.390596 -> hsa:8826( IQGAP1 , cytoplasm ) - 16.031245                                                                                                                                                                                                             | 9  | 28.345762 |
| -> hsa:5879( RAC1 , golgi ) - 15.788264 -> hsa:5058( PAK1 , cytoplasm ) - 7.217161 -> hsa:9641( IKBKE , cytoplasm ) - 4.410487 -> hsa:10492( SYNCRIP , nucleus )                                                                                                                                                                                                                                                                            |    |           |
| hsa:3625( INHBB , extracellular ) - 65.460916 -> hsa:90( ACVR1 , cytoplasm ) - 8.820974 -> hsa:3551( IKKBK , cytoplasm ) - 8.820974 -> hsa:7314( UBB , nucleus )                                                                                                                                                                                                                                                                            | 4  | 27.700955 |
| hsa:3626( INHBC , extracellular ) - 65.460916 -> hsa:90( ACVR1 , cytoplasm ) - 8.820974 -> hsa:3551( IKKBK , cytoplasm ) - 8.820974 -> hsa:7314( UBB , nucleus )                                                                                                                                                                                                                                                                            | 4  | 27.700955 |
| hsa:5054( SERPINE1 , extracellular ) - 69.278180 -> hsa:5328( PLAU , extracellular ) - 32.655426 -> hsa:3082( HGF , extracellular ) - 3.247723 -> hsa:4233( MET , cytoplasm ) - 2.373007 -> hsa:7409( VAV1 , cytoplasm ) - 29.522727                                                                                                                                                                                                        | 10 | 26.739592 |
| -> hsa:3265( HRAS , cytoplasm ) - 2.145471 -> hsa:3656( IRAK2 , cytoplasm ) - 23.645307 -> hsa:7189( TRAF6 , cytoplasm ) - 38.304122 -> hsa:867( CBL , cytoplasm ) - 39.484362 -> hsa:84959( STS-1 , nucleus )                                                                                                                                                                                                                              |    |           |
| hsa:5345( SERPINF2 , extracellular ) - 69.278180 -> hsa:5328( PLAU , extracellular ) - 32.655426 -> hsa:3082( HGF , extracellular ) - 3.247723 -> hsa:4233( MET , cytoplasm ) - 2.373007 -> hsa:7409( VAV1 , cytoplasm ) - 29.522727                                                                                                                                                                                                        | 10 | 26.739592 |
| -> hsa:3265( HRAS , cytoplasm ) - 2.145471 -> hsa:3656( IRAK2 , cytoplasm ) - 23.645307 -> hsa:7189( TRAF6 , cytoplasm ) - 38.304122 -> hsa:867( CBL , cytoplasm ) - 39.484362 -> hsa:84959( STS-1 , nucleus )                                                                                                                                                                                                                              |    |           |
| hsa:5269( SERPINB6 , extracellular ) - 69.278180 -> hsa:5328( PLAU , extracellular ) - 32.655426 -> hsa:3082( HGF ,                                                                                                                                                                                                                                                                                                                         | 10 | 26.739592 |

|                                                                                                                                                                                                                                                                                                                                                                                                                                                              |    |           |
|--------------------------------------------------------------------------------------------------------------------------------------------------------------------------------------------------------------------------------------------------------------------------------------------------------------------------------------------------------------------------------------------------------------------------------------------------------------|----|-----------|
| extracellular ) - 3.247723 -> hsa:4233( MET , cytoplasm ) - 2.373007 -> hsa:7409( VAV1 , cytoplasm ) - 29.522727<br>-> hsa:3265( HRAS , cytoplasm ) - 2.145471 -> hsa:3656( IRAK2 , cytoplasm ) - 23.645307 -> hsa:7189( TRAF6 , cytoplasm )<br>- 38.304122 -> hsa:867( CBL , cytoplasm ) - 39.484362 -> hsa:84959( STS-1 , nucleus )                                                                                                                        |    |           |
| hsa:5104( SERPINA5 , extracellular ) - 69.278180 -> hsa:5328( PLAU , extracellular ) - 32.655426 -> hsa:3082( HGF ,<br>extracellular ) - 3.247723 -> hsa:4233( MET , cytoplasm ) - 2.373007 -> hsa:7409( VAV1 , cytoplasm ) - 29.522727<br>-> hsa:3265( HRAS , cytoplasm ) - 2.145471 -> hsa:3656( IRAK2 , cytoplasm ) - 23.645307 -> hsa:7189( TRAF6 , cytoplasm )<br>- 38.304122 -> hsa:867( CBL , cytoplasm ) - 39.484362 -> hsa:84959( STS-1 , nucleus ) | 10 | 26.739592 |
| hsa:5055( SERPINB2 , extracellular ) - 69.278180 -> hsa:5328( PLAU , extracellular ) - 32.655426 -> hsa:3082( HGF ,<br>extracellular ) - 3.247723 -> hsa:4233( MET , cytoplasm ) - 2.373007 -> hsa:7409( VAV1 , cytoplasm ) - 29.522727<br>-> hsa:3265( HRAS , cytoplasm ) - 2.145471 -> hsa:3656( IRAK2 , cytoplasm ) - 23.645307 -> hsa:7189( TRAF6 , cytoplasm )<br>- 38.304122 -> hsa:867( CBL , cytoplasm ) - 39.484362 -> hsa:84959( STS-1 , nucleus ) | 10 | 26.739592 |
| hsa:9241( NOG , extracellular ) - 103.646450 -> hsa:655( BMP7 , extracellular ) - 65.460916 -> hsa:658( BMPR1B ,<br>cytoplasm ) - 2.524005 -> hsa:9459( ARHGEF6 , cytoplasm ) - 12.338863 -> hsa:28964( GIT1 , cytoplasm ) - 19.664149<br>-> hsa:580( BARD1 , nucleus ) - 2.288050 -> hsa:983( CDC2 , nucleus ) - 3.032210 -> hsa:10524( HTATIP , nucleus )<br>- 4.506367 -> hsa:648( BMI1 , nucleus )                                                       | 9  | 26.682626 |
| hsa:9241( NOG , extracellular ) - 103.646450 -> hsa:655( BMP7 , extracellular ) - 65.460916 -> hsa:658( BMPR1B ,<br>cytoplasm ) - 2.524005 -> hsa:9459( ARHGEF6 , cytoplasm ) - 29.522727 -> hsa:998( CDC42 , cytoplasm ) - 2.145471<br>-> hsa:5601( MAPK9 , cytoplasm ) - 3.032210 -> hsa:7597( ZNF46 , nucleus ) - 4.506367 -> hsa:7186( TRAF2 , cytoplasm )<br>- 24.033959 -> hsa:56893( UBQLN4 , nucleus ) - 2.205244 -> hsa:28951( TRIB2 , nucleus )    | 10 | 26.341928 |
| hsa:9241( NOG , extracellular ) - 103.646450 -> hsa:655( BMP7 , extracellular ) - 65.460916 -> hsa:90( ACVR1 ,<br>cytoplasm ) - 2.071011 -> hsa:9306( SOCS6 , cytoplasm ) - 7.622199 -> hsa:8660( IRS2 , cytoplasm ) - 4.398215 -><br>hsa:5335( PLCG1 , cytoplasm ) - 20.265953 -> hsa:387( RHOA , cytoplasm ) - 2.145471 -> hsa:5566( PRKACA730418 ,<br>cytoplasm ) - 4.410487 -> hsa:3184( HNRPD , nucleus )                                               | 9  | 26.252588 |
| hsa:3625( INHBB , extracellular ) - 65.460916 -> hsa:90( ACVR1 , cytoplasm ) - 8.820974 -> hsa:3551( IKBKB , cytoplasm )<br>- 4.410487 -> hsa:7182( NR2C2 , nucleus )                                                                                                                                                                                                                                                                                        | 4  | 26.230792 |
| hsa:3626( INHBC , extracellular ) - 65.460916 -> hsa:90( ACVR1 , cytoplasm ) - 8.820974 -> hsa:3551( IKBKB , cytoplasm )<br>- 4.410487 -> hsa:7182( NR2C2 , nucleus )                                                                                                                                                                                                                                                                                        | 4  | 26.230792 |
| hsa:654( BMP6 , extracellular ) - 65.460916 -> hsa:658( BMPR1B , cytoplasm ) - 2.071011 -> hsa:1123( CHN1 , cytoplasm )<br>- 33.843739 -> hsa:5879( RAC1 , golgi ) - 43.073849 -> hsa:7454( WAS , cytoplasm ) - 7.217161 -> hsa:1457( CSNK2A1 ,<br>cytoplasm ) - 5.390596 -> hsa:1649( DDIT3 , nucleus )                                                                                                                                                     | 7  | 26.176212 |
| hsa:654( BMP6 , extracellular ) - 65.460916 -> hsa:658( BMPR1B , cytoplasm ) - 2.071011 -> hsa:1123( CHN1 , cytoplasm )<br>- 33.843739 -> hsa:5879( RAC1 , golgi ) - 43.073849 -> hsa:7454( WAS , cytoplasm ) - 7.217161 -> hsa:1457( CSNK2A1 ,<br>cytoplasm ) - 5.390596 -> hsa:466( ATF1 , nucleus )                                                                                                                                                       | 7  | 26.176212 |
| hsa:654( BMP6 , extracellular ) - 65.460916 -> hsa:658( BMPR1B , cytoplasm ) - 2.071011 -> hsa:1123( CHN1 , cytoplasm )<br>- 33.843739 -> hsa:5879( RAC1 , golgi ) - 43.073849 -> hsa:7454( WAS , cytoplasm ) - 7.217161 -> hsa:1457( CSNK2A1 ,<br>cytoplasm ) - 5.390596 -> hsa:3725( JUN , nucleus )                                                                                                                                                       | 7  | 26.176212 |
| hsa:9241( NOG , extracellular ) - 103.646450 -> hsa:655( BMP7 , extracellular ) - 65.460916 -> hsa:90( ACVR1 ,<br>cytoplasm ) - 2.071011 -> hsa:9306( SOCS6 , cytoplasm ) - 7.622199 -> hsa:8660( IRS2 , cytoplasm ) - 4.398215 -><br>hsa:5335( PLCG1 , cytoplasm ) - 20.265953 -> hsa:387( RHOA , cytoplasm ) - 2.145471 -> hsa:5566( PRKACA730418 ,<br>cytoplasm ) - 3.032210 -> hsa:26993( AKAP8L , nucleus )                                             | 9  | 26.080303 |
| hsa:3625( INHBB , extracellular ) - 65.460916 -> hsa:90( ACVR1 , cytoplasm ) - 2.071011 -> hsa:1123( CHN1 , cytoplasm )<br>- 33.843739 -> hsa:5879( RAC1 , golgi ) - 43.073849 -> hsa:7454( WAS , cytoplasm ) - 7.217161 -> hsa:1457( CSNK2A1 ,<br>cytoplasm ) - 4.410487 -> hsa:3183( HNRNPC , nucleus )                                                                                                                                                    | 7  | 26.01286  |
| hsa:3625( INHBB , extracellular ) - 65.460916 -> hsa:90( ACVR1 , cytoplasm ) - 2.071011 -> hsa:1123( CHN1 , cytoplasm )                                                                                                                                                                                                                                                                                                                                      | 7  | 26.01286  |

|                                                                                                                                                                                                                                                                                                                                                                                                 |    |           |
|-------------------------------------------------------------------------------------------------------------------------------------------------------------------------------------------------------------------------------------------------------------------------------------------------------------------------------------------------------------------------------------------------|----|-----------|
| - 33.843739 -> hsa:5879( RAC1 , golgi ) - 43.073849 -> hsa:7454( WAS , cytoplasm ) - 7.217161 -> hsa:1457( CSNK2A1 , cytoplasm ) - 4.410487 -> hsa:140890( SFRS12 , nucleus )                                                                                                                                                                                                                   |    |           |
| hsa:3626( INHBC , extracellular ) - 65.460916 -> hsa:90( ACVR1 , cytoplasm ) - 2.071011 -> hsa:1123( CHN1 , cytoplasm )                                                                                                                                                                                                                                                                         |    |           |
| - 33.843739 -> hsa:5879( RAC1 , golgi ) - 43.073849 -> hsa:7454( WAS , cytoplasm ) - 7.217161 -> hsa:1457( CSNK2A1 , cytoplasm ) - 4.410487 -> hsa:3183( HNRNPC , nucleus )                                                                                                                                                                                                                     | 7  | 26.01286  |
| hsa:3626( INHBC , extracellular ) - 65.460916 -> hsa:90( ACVR1 , cytoplasm ) - 2.071011 -> hsa:1123( CHN1 , cytoplasm )                                                                                                                                                                                                                                                                         |    |           |
| - 33.843739 -> hsa:5879( RAC1 , golgi ) - 43.073849 -> hsa:7454( WAS , cytoplasm ) - 7.217161 -> hsa:1457( CSNK2A1 , cytoplasm ) - 4.410487 -> hsa:140890( SFRS12 , nucleus )                                                                                                                                                                                                                   | 7  | 26.01286  |
| hsa:9241( NOG , extracellular ) - 103.646450 -> hsa:655( BMP7 , extracellular ) - 65.460916 -> hsa:90( ACVR1 , cytoplasm ) - 2.071011 -> hsa:9306( SOCS6 , cytoplasm ) - 7.622199 -> hsa:8660( IRS2 , cytoplasm ) - 4.398215 -> hsa:5335( PLCG1 , cytoplasm ) - 20.265953 -> hsa:387( RHOA , cytoplasm ) - 2.145471 -> hsa:5590( PRKCZ , cytoplasm ) - 2.205244 -> hsa:4773( NFATC2 , nucleus ) | 9  | 25.976932 |
| hsa:654( BMP6 , extracellular ) - 65.460916 -> hsa:658( BMPR1B , cytoplasm ) - 2.071011 -> hsa:1123( CHN1 , cytoplasm )                                                                                                                                                                                                                                                                         |    |           |
| - 33.843739 -> hsa:5879( RAC1 , golgi ) - 43.073849 -> hsa:7454( WAS , cytoplasm ) - 7.217161 -> hsa:1457( CSNK2A1 , cytoplasm ) - 3.032210 -> hsa:10661( KLF1 , nucleus )                                                                                                                                                                                                                      | 7  | 25.783148 |
| hsa:3625( INHBB , extracellular ) - 65.460916 -> hsa:90( ACVR1 , cytoplasm ) - 2.071011 -> hsa:1123( CHN1 , cytoplasm )                                                                                                                                                                                                                                                                         |    |           |
| - 33.843739 -> hsa:5879( RAC1 , golgi ) - 43.073849 -> hsa:7454( WAS , cytoplasm ) - 7.217161 -> hsa:1457( CSNK2A1 , cytoplasm ) - 2.520278 -> hsa:405( ARNT , nucleus )                                                                                                                                                                                                                        | 7  | 25.697826 |
| hsa:3626( INHBC , extracellular ) - 65.460916 -> hsa:90( ACVR1 , cytoplasm ) - 2.071011 -> hsa:1123( CHN1 , cytoplasm )                                                                                                                                                                                                                                                                         |    |           |
| - 33.843739 -> hsa:5879( RAC1 , golgi ) - 43.073849 -> hsa:7454( WAS , cytoplasm ) - 7.217161 -> hsa:1457( CSNK2A1 , cytoplasm ) - 2.520278 -> hsa:405( ARNT , nucleus )                                                                                                                                                                                                                        | 7  | 25.697826 |
| hsa:3625( INHBB , extracellular ) - 65.460916 -> hsa:90( ACVR1 , cytoplasm ) - 8.820974 -> hsa:3551( IKBKB , cytoplasm ) - 2.520278 -> hsa:8202( NCOA3 , nucleus )                                                                                                                                                                                                                              | 4  | 25.600723 |
| hsa:3626( INHBC , extracellular ) - 65.460916 -> hsa:90( ACVR1 , cytoplasm ) - 8.820974 -> hsa:3551( IKBKB , cytoplasm ) - 2.520278 -> hsa:8202( NCOA3 , nucleus )                                                                                                                                                                                                                              | 4  | 25.600723 |
| hsa:3625( INHBB , extracellular ) - 65.460916 -> hsa:90( ACVR1 , cytoplasm ) - 8.820974 -> hsa:3551( IKBKB , cytoplasm ) - 2.205244 -> hsa:5970( RELA , nucleus )                                                                                                                                                                                                                               | 4  | 25.495711 |
| hsa:3626( INHBC , extracellular ) - 65.460916 -> hsa:90( ACVR1 , cytoplasm ) - 8.820974 -> hsa:3551( IKBKB , cytoplasm ) - 2.205244 -> hsa:5970( RELA , nucleus )                                                                                                                                                                                                                               | 4  | 25.495711 |
| hsa:654( BMP6 , extracellular ) - 65.460916 -> hsa:658( BMPR1B , cytoplasm ) - 2.524005 -> hsa:9459( ARHGEF6 , cytoplasm ) - 29.522727 -> hsa:998( CDC42 , cytoplasm ) - 43.073849 -> hsa:7454( WAS , cytoplasm ) - 7.217161 -> hsa:1457( CSNK2A1 , cytoplasm ) - 4.410487 -> hsa:5241( PGR , nucleus )                                                                                         | 7  | 25.368191 |
| hsa:654( BMP6 , extracellular ) - 65.460916 -> hsa:658( BMPR1B , cytoplasm ) - 2.524005 -> hsa:9459( ARHGEF6 , cytoplasm ) - 29.522727 -> hsa:998( CDC42 , cytoplasm ) - 43.073849 -> hsa:7454( WAS , cytoplasm ) - 7.217161 -> hsa:1457( CSNK2A1 , cytoplasm ) - 4.410487 -> hsa:7421( VDR , nucleus )                                                                                         | 7  | 25.368191 |
| hsa:654( BMP6 , extracellular ) - 65.460916 -> hsa:658( BMPR1B , cytoplasm ) - 2.524005 -> hsa:9459( ARHGEF6 , cytoplasm ) - 29.522727 -> hsa:998( CDC42 , cytoplasm ) - 43.073849 -> hsa:7454( WAS , cytoplasm ) - 7.217161 -> hsa:1457( CSNK2A1 , cytoplasm ) - 4.410487 -> hsa:10921( RNPS1 , nucleus )                                                                                      | 7  | 25.368191 |
| hsa:654( BMP6 , extracellular ) - 65.460916 -> hsa:658( BMPR1B , cytoplasm ) - 2.524005 -> hsa:9459( ARHGEF6 , cytoplasm ) - 29.522727 -> hsa:998( CDC42 , cytoplasm ) - 43.073849 -> hsa:7454( WAS , cytoplasm ) - 7.217161 -> hsa:1457( CSNK2A1 , cytoplasm ) - 2.520278 -> hsa:3091( HIF1A , nucleus )                                                                                       | 7  | 25.053156 |
| hsa:3625( INHBB , extracellular ) - 65.460916 -> hsa:90( ACVR1 , cytoplasm ) - 2.071011 -> hsa:9306( SOCS6 , cytoplasm ) - 7.896873 -> hsa:5296( PIK3R2 , cytoplasm ) - 6.441242 -> hsa:6654( SOS1 , cytoplasm ) - 37.788059 -> hsa:3265( HRAS , cytoplasm ) - 2.145471 -> hsa:3656( IRAK2 , cytoplasm ) - 23.645307 -> hsa:7189( TRAF6 , cytoplasm ) - 38.304122                               | 10 | 24.804151 |

|                                                                                                                                                                                                                                                                                                                                                                                                         |   |           |
|---------------------------------------------------------------------------------------------------------------------------------------------------------------------------------------------------------------------------------------------------------------------------------------------------------------------------------------------------------------------------------------------------------|---|-----------|
| -> hsa:867( CBL , cytoplasm ) - 39.484362 -> hsa:84959( STS-1 , nucleus )                                                                                                                                                                                                                                                                                                                               |   |           |
| hsa:5549( PRELP , extracellular ) - 5.219197 -> hsa:3339( HSPG2 , extracellular ) - 9.960019 -> hsa:6678( SPARC , extracellular ) - 34.548817 -> hsa:7040( TGFBI , extracellular ) - 65.460916 -> hsa:7046( TGFBR1 , cytoplasm ) - 8.820974 -> hsa:7314( UBB , nucleus )                                                                                                                                | 6 | 24.801985 |
| hsa:284217( LAMA1 , extracellular ) - 4.053636 -> hsa:3339( HSPG2 , extracellular ) - 9.960019 -> hsa:6678( SPARC , extracellular ) - 34.548817 -> hsa:7040( TGFBI , extracellular ) - 65.460916 -> hsa:7046( TGFBR1 , cytoplasm ) - 8.820974 -> hsa:7314( UBB , nucleus )                                                                                                                              | 6 | 24.568872 |
| hsa:654( BMP6 , extracellular ) - 65.460916 -> hsa:658( BMPR1B , cytoplasm ) - 2.071011 -> hsa:1123( CHN1 , cytoplasm ) - 33.843739 -> hsa:5879( RAC1 , golgi ) - 15.788264 -> hsa:5058( PAK1 , cytoplasm ) - 4.410487 -> hsa:2099( ESR1 , nucleus )                                                                                                                                                    | 6 | 24.314883 |
| hsa:3625( INHBB , extracellular ) - 65.460916 -> hsa:90( ACVR1 , cytoplasm ) - 2.071011 -> hsa:1123( CHN1 , cytoplasm ) - 33.843739 -> hsa:5879( RAC1 , golgi ) - 15.788264 -> hsa:5058( PAK1 , cytoplasm ) - 4.410487 -> hsa:2099( ESR1 , nucleus )                                                                                                                                                    | 6 | 24.314883 |
| hsa:3626( INHBC , extracellular ) - 65.460916 -> hsa:90( ACVR1 , cytoplasm ) - 2.071011 -> hsa:1123( CHN1 , cytoplasm ) - 33.843739 -> hsa:5879( RAC1 , golgi ) - 15.788264 -> hsa:5058( PAK1 , cytoplasm ) - 4.410487 -> hsa:2099( ESR1 , nucleus )                                                                                                                                                    | 6 | 24.314883 |
| hsa:5054( SERPINE1 , extracellular ) - 69.278180 -> hsa:5328( PLAU , extracellular ) - 32.655426 -> hsa:3082( HGF , extracellular ) - 3.247723 -> hsa:4233( MET , cytoplasm ) - 2.373007 -> hsa:7409( VAV1 , cytoplasm ) - 29.522727 -> hsa:5879( RAC1 , golgi ) - 43.073849 -> hsa:7454( WAS , cytoplasm ) - 7.217161 -> hsa:1457( CSNK2A1 , cytoplasm ) - 5.390596 -> hsa:466( ATF1 , nucleus )       | 9 | 24.094834 |
| hsa:5345( SERPINF2 , extracellular ) - 69.278180 -> hsa:5328( PLAU , extracellular ) - 32.655426 -> hsa:3082( HGF , extracellular ) - 3.247723 -> hsa:4233( MET , cytoplasm ) - 2.373007 -> hsa:7409( VAV1 , cytoplasm ) - 29.522727 -> hsa:5879( RAC1 , golgi ) - 43.073849 -> hsa:7454( WAS , cytoplasm ) - 7.217161 -> hsa:1457( CSNK2A1 , cytoplasm ) - 5.390596 -> hsa:466( ATF1 , nucleus )       | 9 | 24.094834 |
| hsa:5269( SERPINB6 , extracellular ) - 69.278180 -> hsa:5328( PLAU , extracellular ) - 32.655426 -> hsa:3082( HGF , extracellular ) - 3.247723 -> hsa:4233( MET , cytoplasm ) - 2.373007 -> hsa:7409( VAV1 , cytoplasm ) - 29.522727 -> hsa:5879( RAC1 , golgi ) - 43.073849 -> hsa:7454( WAS , cytoplasm ) - 7.217161 -> hsa:1457( CSNK2A1 , cytoplasm ) - 5.390596 -> hsa:466( ATF1 , nucleus )       | 9 | 24.094834 |
| hsa:5104( SERPINA5 , extracellular ) - 69.278180 -> hsa:5328( PLAU , extracellular ) - 32.655426 -> hsa:3082( HGF , extracellular ) - 3.247723 -> hsa:4233( MET , cytoplasm ) - 2.373007 -> hsa:7409( VAV1 , cytoplasm ) - 29.522727 -> hsa:5879( RAC1 , golgi ) - 43.073849 -> hsa:7454( WAS , cytoplasm ) - 7.217161 -> hsa:1457( CSNK2A1 , cytoplasm ) - 5.390596 -> hsa:466( ATF1 , nucleus )       | 9 | 24.094834 |
| hsa:5055( SERPINB2 , extracellular ) - 69.278180 -> hsa:5328( PLAU , extracellular ) - 32.655426 -> hsa:3082( HGF , extracellular ) - 3.247723 -> hsa:4233( MET , cytoplasm ) - 2.373007 -> hsa:7409( VAV1 , cytoplasm ) - 29.522727 -> hsa:5879( RAC1 , golgi ) - 43.073849 -> hsa:7454( WAS , cytoplasm ) - 7.217161 -> hsa:1457( CSNK2A1 , cytoplasm ) - 5.390596 -> hsa:466( ATF1 , nucleus )       | 9 | 24.094834 |
| hsa:5054( SERPINE1 , extracellular ) - 69.278180 -> hsa:5328( PLAU , extracellular ) - 32.655426 -> hsa:3082( HGF , extracellular ) - 3.247723 -> hsa:4233( MET , cytoplasm ) - 2.373007 -> hsa:7409( VAV1 , cytoplasm ) - 29.522727 -> hsa:5879( RAC1 , golgi ) - 43.073849 -> hsa:7454( WAS , cytoplasm ) - 7.217161 -> hsa:1457( CSNK2A1 , cytoplasm ) - 4.410487 -> hsa:3181( HNRNPA2B1 , nucleus ) | 9 | 23.97232  |
| hsa:5345( SERPINF2 , extracellular ) - 69.278180 -> hsa:5328( PLAU , extracellular ) - 32.655426 -> hsa:3082( HGF , extracellular ) - 3.247723 -> hsa:4233( MET , cytoplasm ) - 2.373007 -> hsa:7409( VAV1 , cytoplasm ) - 29.522727 -> hsa:5879( RAC1 , golgi ) - 43.073849 -> hsa:7454( WAS , cytoplasm ) - 7.217161 -> hsa:1457( CSNK2A1 , cytoplasm ) - 4.410487 -> hsa:3181( HNRNPA2B1 , nucleus ) | 9 | 23.97232  |

|                                                                                                                                                                                                                                                                                                                                                                                                                                        |   |           |
|----------------------------------------------------------------------------------------------------------------------------------------------------------------------------------------------------------------------------------------------------------------------------------------------------------------------------------------------------------------------------------------------------------------------------------------|---|-----------|
| <p>hsa:5269( SERPINB6 , extracellular ) - 69.278180 -&gt; hsa:5328( PLAU , extracellular ) - 32.655426 -&gt; hsa:3082( HGF , extracellular ) - 3.247723 -&gt; hsa:4233( MET , cytoplasm ) - 2.373007 -&gt; hsa:7409( VAV1 , cytoplasm ) - 29.522727 -&gt; hsa:5879( RAC1 , golgi ) - 43.073849 -&gt; hsa:7454( WAS , cytoplasm ) - 7.217161 -&gt; hsa:1457( CSNK2A1 , cytoplasm ) - 4.410487 -&gt; hsa:3181( HNRNPA2B1 , nucleus )</p> | 9 | 23.97232  |
| <p>hsa:5104( SERPINA5 , extracellular ) - 69.278180 -&gt; hsa:5328( PLAU , extracellular ) - 32.655426 -&gt; hsa:3082( HGF , extracellular ) - 3.247723 -&gt; hsa:4233( MET , cytoplasm ) - 2.373007 -&gt; hsa:7409( VAV1 , cytoplasm ) - 29.522727 -&gt; hsa:5879( RAC1 , golgi ) - 43.073849 -&gt; hsa:7454( WAS , cytoplasm ) - 7.217161 -&gt; hsa:1457( CSNK2A1 , cytoplasm ) - 4.410487 -&gt; hsa:3181( HNRNPA2B1 , nucleus )</p> | 9 | 23.97232  |
| <p>hsa:5055( SERPINB2 , extracellular ) - 69.278180 -&gt; hsa:5328( PLAU , extracellular ) - 32.655426 -&gt; hsa:3082( HGF , extracellular ) - 3.247723 -&gt; hsa:4233( MET , cytoplasm ) - 2.373007 -&gt; hsa:7409( VAV1 , cytoplasm ) - 29.522727 -&gt; hsa:5879( RAC1 , golgi ) - 43.073849 -&gt; hsa:7454( WAS , cytoplasm ) - 7.217161 -&gt; hsa:1457( CSNK2A1 , cytoplasm ) - 4.410487 -&gt; hsa:3181( HNRNPA2B1 , nucleus )</p> | 9 | 23.97232  |
| <p>hsa:654( BMP6 , extracellular ) - 65.460916 -&gt; hsa:658( BMPR1B , cytoplasm ) - 2.524005 -&gt; hsa:9459( ARHGEF6 , cytoplasm ) - 12.338863 -&gt; hsa:28964( GIT1 , cytoplasm ) - 19.664149 -&gt; hsa:580( BARD1 , nucleus ) - 19.664149 -&gt; hsa:672( BRCA1 , nucleus ) - 24.033959 -&gt; hsa:7314( UBB , nucleus )</p>                                                                                                          | 7 | 23.947673 |
| <p>hsa:654( BMP6 , extracellular ) - 65.460916 -&gt; hsa:658( BMPR1B , cytoplasm ) - 2.071011 -&gt; hsa:1123( CHN1 , cytoplasm ) - 33.843739 -&gt; hsa:5879( RAC1 , golgi ) - 2.145471 -&gt; hsa:5610( EIF2AK2 , nucleus ) - 16.171787 -&gt; hsa:7157( TP53 , nucleus )</p>                                                                                                                                                            | 6 | 23.938585 |
| <p>hsa:3625( INHBB , extracellular ) - 65.460916 -&gt; hsa:90( ACVR1 , cytoplasm ) - 2.071011 -&gt; hsa:1123( CHN1 , cytoplasm ) - 33.843739 -&gt; hsa:5879( RAC1 , golgi ) - 2.145471 -&gt; hsa:5578( PRKCA , cytoplasm ) - 16.171787 -&gt; hsa:7157( TP53 , nucleus )</p>                                                                                                                                                            | 6 | 23.938585 |
| <p>hsa:3626( INHBC , extracellular ) - 65.460916 -&gt; hsa:90( ACVR1 , cytoplasm ) - 2.071011 -&gt; hsa:1123( CHN1 , cytoplasm ) - 33.843739 -&gt; hsa:5879( RAC1 , golgi ) - 2.145471 -&gt; hsa:5578( PRKCA , cytoplasm ) - 16.171787 -&gt; hsa:7157( TP53 , nucleus )</p>                                                                                                                                                            | 6 | 23.938585 |
| <p>hsa:5054( SERPINE1 , extracellular ) - 69.278180 -&gt; hsa:5328( PLAU , extracellular ) - 32.655426 -&gt; hsa:3082( HGF , extracellular ) - 3.247723 -&gt; hsa:4233( MET , cytoplasm ) - 2.373007 -&gt; hsa:7409( VAV1 , cytoplasm ) - 29.522727 -&gt; hsa:5879( RAC1 , golgi ) - 43.073849 -&gt; hsa:7454( WAS , cytoplasm ) - 7.217161 -&gt; hsa:1457( CSNK2A1 , cytoplasm ) - 3.032210 -&gt; hsa:10661( KLF1 , nucleus )</p>     | 9 | 23.800035 |
| <p>hsa:5345( SERPINF2 , extracellular ) - 69.278180 -&gt; hsa:5328( PLAU , extracellular ) - 32.655426 -&gt; hsa:3082( HGF , extracellular ) - 3.247723 -&gt; hsa:4233( MET , cytoplasm ) - 2.373007 -&gt; hsa:7409( VAV1 , cytoplasm ) - 29.522727 -&gt; hsa:5879( RAC1 , golgi ) - 43.073849 -&gt; hsa:7454( WAS , cytoplasm ) - 7.217161 -&gt; hsa:1457( CSNK2A1 , cytoplasm ) - 3.032210 -&gt; hsa:10661( KLF1 , nucleus )</p>     | 9 | 23.800035 |
| <p>hsa:5269( SERPINB6 , extracellular ) - 69.278180 -&gt; hsa:5328( PLAU , extracellular ) - 32.655426 -&gt; hsa:3082( HGF , extracellular ) - 3.247723 -&gt; hsa:4233( MET , cytoplasm ) - 2.373007 -&gt; hsa:7409( VAV1 , cytoplasm ) - 29.522727 -&gt; hsa:5879( RAC1 , golgi ) - 43.073849 -&gt; hsa:7454( WAS , cytoplasm ) - 7.217161 -&gt; hsa:1457( CSNK2A1 , cytoplasm ) - 3.032210 -&gt; hsa:10661( KLF1 , nucleus )</p>     | 9 | 23.800035 |
| <p>hsa:5104( SERPINA5 , extracellular ) - 69.278180 -&gt; hsa:5328( PLAU , extracellular ) - 32.655426 -&gt; hsa:3082( HGF , extracellular ) - 3.247723 -&gt; hsa:4233( MET , cytoplasm ) - 2.373007 -&gt; hsa:7409( VAV1 , cytoplasm ) - 29.522727 -&gt; hsa:5879( RAC1 , golgi ) - 43.073849 -&gt; hsa:7454( WAS , cytoplasm ) - 7.217161 -&gt; hsa:1457( CSNK2A1 , cytoplasm ) - 3.032210 -&gt; hsa:10661( KLF1 , nucleus )</p>     | 9 | 23.800035 |
| <p>hsa:5055( SERPINB2 , extracellular ) - 69.278180 -&gt; hsa:5328( PLAU , extracellular ) - 32.655426 -&gt; hsa:3082( HGF , extracellular ) - 3.247723 -&gt; hsa:4233( MET , cytoplasm ) - 2.373007 -&gt; hsa:7409( VAV1 , cytoplasm ) - 29.522727 -&gt; hsa:5879( RAC1 , golgi ) - 43.073849 -&gt; hsa:7454( WAS , cytoplasm ) - 7.217161 -&gt; hsa:1457( CSNK2A1 , cytoplasm ) - 3.032210 -&gt; hsa:10661( KLF1 , nucleus )</p>     | 9 | 23.800035 |

|                                                                                                                                                                                                                                                                                                                                                                  |   |           |
|------------------------------------------------------------------------------------------------------------------------------------------------------------------------------------------------------------------------------------------------------------------------------------------------------------------------------------------------------------------|---|-----------|
| hsa:654( BMP6 , extracellular ) - 65.460916 -> hsa:658( BMPR1B , cytoplasm ) - 2.071011 -> hsa:1123( CHN1 , cytoplasm )<br>- 33.843739 -> hsa:5879( RAC1 , golgi ) - 15.788264 -> hsa:5058( PAK1 , cytoplasm ) - 7.217161 -> hsa:7046( TGFBR1 ,<br>cytoplasm ) - 17.330023 -> hsa:4089( SMAD4 , nucleus )                                                        | 7 | 23.618519 |
| hsa:654( BMP6 , extracellular ) - 65.460916 -> hsa:658( BMPR1B , cytoplasm ) - 2.071011 -> hsa:1123( CHN1 , cytoplasm )<br>- 33.843739 -> hsa:5879( RAC1 , golgi ) - 15.788264 -> hsa:5058( PAK1 , cytoplasm ) - 7.217161 -> hsa:7046( TGFBR1 ,<br>cytoplasm ) - 17.330023 -> hsa:4088( SMAD3 , nucleus )                                                        | 7 | 23.618519 |
| hsa:654( BMP6 , extracellular ) - 65.460916 -> hsa:658( BMPR1B , cytoplasm ) - 2.071011 -> hsa:1123( CHN1 , cytoplasm )<br>- 33.843739 -> hsa:5879( RAC1 , golgi ) - 15.788264 -> hsa:5058( PAK1 , cytoplasm ) - 7.217161 -> hsa:90( ACVR1 ,<br>cytoplasm ) - 17.330023 -> hsa:4093( SMAD9 , nucleus )                                                           | 7 | 23.618519 |
| hsa:654( BMP6 , extracellular ) - 65.460916 -> hsa:658( BMPR1B , cytoplasm ) - 2.071011 -> hsa:1123( CHN1 , cytoplasm )<br>- 33.843739 -> hsa:5879( RAC1 , golgi ) - 15.788264 -> hsa:5058( PAK1 , cytoplasm ) - 7.217161 -> hsa:90( ACVR1 ,<br>cytoplasm ) - 17.330023 -> hsa:4090( SMAD5 , nucleus )                                                           | 7 | 23.618519 |
| hsa:654( BMP6 , extracellular ) - 65.460916 -> hsa:658( BMPR1B , cytoplasm ) - 2.524005 -> hsa:9459( ARHGEF6 ,<br>cytoplasm ) - 29.522727 -> hsa:998( CDC42 , cytoplasm ) - 15.788264 -> hsa:56924( PAK6 , cytoplasm ) - 4.410487<br>-> hsa:2099( ESR1 , nucleus )                                                                                               | 6 | 23.54128  |
| hsa:654( BMP6 , extracellular ) - 65.460916 -> hsa:658( BMPR1B , cytoplasm ) - 2.524005 -> hsa:9459( ARHGEF6 ,<br>cytoplasm ) - 29.522727 -> hsa:998( CDC42 , cytoplasm ) - 15.788264 -> hsa:56924( PAK6 , cytoplasm ) - 4.410487<br>-> hsa:367( AR , nucleus )                                                                                                  | 6 | 23.54128  |
| hsa:5054( SERPINE1 , extracellular ) - 69.278180 -> hsa:5328( PLAU , extracellular ) - 32.655426 -> hsa:3082( HGF ,<br>extracellular ) - 3.247723 -> hsa:4233( MET , cytoplasm ) - 2.373007 -> hsa:7409( VAV1 , cytoplasm ) - 29.522727<br>-> hsa:3265( HRAS , cytoplasm ) - 22.582651 -> hsa:5894( RAF1 , cytoplasm ) - 4.410487 -> hsa:2908( NR3C1 , nucleus ) | 8 | 23.4386   |
| hsa:5345( SERPINF2 , extracellular ) - 69.278180 -> hsa:5328( PLAU , extracellular ) - 32.655426 -> hsa:3082( HGF ,<br>extracellular ) - 3.247723 -> hsa:4233( MET , cytoplasm ) - 2.373007 -> hsa:7409( VAV1 , cytoplasm ) - 29.522727<br>-> hsa:3265( HRAS , cytoplasm ) - 22.582651 -> hsa:5894( RAF1 , cytoplasm ) - 4.410487 -> hsa:2908( NR3C1 , nucleus ) | 8 | 23.4386   |
| hsa:5269( SERPINB6 , extracellular ) - 69.278180 -> hsa:5328( PLAU , extracellular ) - 32.655426 -> hsa:3082( HGF ,<br>extracellular ) - 3.247723 -> hsa:4233( MET , cytoplasm ) - 2.373007 -> hsa:7409( VAV1 , cytoplasm ) - 29.522727<br>-> hsa:3265( HRAS , cytoplasm ) - 22.582651 -> hsa:5894( RAF1 , cytoplasm ) - 4.410487 -> hsa:2908( NR3C1 , nucleus ) | 8 | 23.4386   |
| hsa:5104( SERPINA5 , extracellular ) - 69.278180 -> hsa:5328( PLAU , extracellular ) - 32.655426 -> hsa:3082( HGF ,<br>extracellular ) - 3.247723 -> hsa:4233( MET , cytoplasm ) - 2.373007 -> hsa:7409( VAV1 , cytoplasm ) - 29.522727<br>-> hsa:3265( HRAS , cytoplasm ) - 22.582651 -> hsa:5894( RAF1 , cytoplasm ) - 4.410487 -> hsa:2908( NR3C1 , nucleus ) | 8 | 23.4386   |
| hsa:5055( SERPINB2 , extracellular ) - 69.278180 -> hsa:5328( PLAU , extracellular ) - 32.655426 -> hsa:3082( HGF ,<br>extracellular ) - 3.247723 -> hsa:4233( MET , cytoplasm ) - 2.373007 -> hsa:7409( VAV1 , cytoplasm ) - 29.522727<br>-> hsa:3265( HRAS , cytoplasm ) - 22.582651 -> hsa:5894( RAF1 , cytoplasm ) - 4.410487 -> hsa:2908( NR3C1 , nucleus ) | 8 | 23.4386   |
| hsa:654( BMP6 , extracellular ) - 65.460916 -> hsa:658( BMPR1B , cytoplasm ) - 2.071011 -> hsa:1123( CHN1 , cytoplasm )<br>- 33.843739 -> hsa:5879( RAC1 , golgi ) - 15.788264 -> hsa:5058( PAK1 , cytoplasm ) - 3.913667 -> hsa:207( AKT1 ,<br>cytoplasm ) - 18.468916 -> hsa:3064( HD , nucleus )                                                              | 7 | 23.257752 |
| hsa:654( BMP6 , extracellular ) - 65.460916 -> hsa:658( BMPR1B , cytoplasm ) - 2.524005 -> hsa:9459( ARHGEF6 ,<br>cytoplasm ) - 29.522727 -> hsa:998( CDC42 , cytoplasm ) - 2.145471 -> hsa:5599( MAPK8 , cytoplasm ) - 16.171787<br>-> hsa:7157( TP53 , nucleus )                                                                                               | 6 | 23.164981 |
| hsa:654( BMP6 , extracellular ) - 65.460916 -> hsa:658( BMPR1B , cytoplasm ) - 2.071011 -> hsa:1123( CHN1 , cytoplasm )<br>- 33.843739 -> hsa:5879( RAC1 , golgi ) - 15.788264 -> hsa:5062( PAK2 , cytoplasm ) - 2.206641 -> hsa:25( ABL129892 ,<br>cytoplasm ) - 16.171787 -> hsa:7161( TP73 , nucleus )                                                        | 7 | 22.590393 |
| hsa:654( BMP6 , extracellular ) - 65.460916 -> hsa:658( BMPR1B , cytoplasm ) - 2.524005 -> hsa:9459( ARHGEF6 ,<br>cytoplasm ) - 29.522727 -> hsa:998( CDC42 , cytoplasm ) - 2.145471 -> hsa:5599( MAPK8 , cytoplasm ) - 13.231462                                                                                                                                | 6 | 22.576916 |









|                                                                                                                                                                                                                                                                                                    |   |           |
|----------------------------------------------------------------------------------------------------------------------------------------------------------------------------------------------------------------------------------------------------------------------------------------------------|---|-----------|
| -> hsa:387( RHOA , cytoplasm ) - 2.145471 -> hsa:7046( TGFBR1 , cytoplasm ) - 17.330023 -> hsa:4086( SMAD1 , nucleus )                                                                                                                                                                             |   |           |
| hsa:5055( SERPINB2 , extracellular ) - 69.278180 -> hsa:5328( PLAU , extracellular ) - 32.655426 -> hsa:3082( HGF , extracellular ) - 3.247723 -> hsa:4233( MET , cytoplasm ) - 2.373007 -> hsa:7409( VAV1 , cytoplasm ) - 29.522727                                                               | 8 | 22.364651 |
| -> hsa:387( RHOA , cytoplasm ) - 2.145471 -> hsa:7046( TGFBR1 , cytoplasm ) - 17.330023 -> hsa:4087( SMAD2 , nucleus )                                                                                                                                                                             |   |           |
| hsa:5054( SERPINE1 , extracellular ) - 69.278180 -> hsa:5328( PLAU , extracellular ) - 32.655426 -> hsa:3082( HGF , extracellular ) - 3.247723 -> hsa:4233( MET , cytoplasm ) - 2.829073 -> hsa:5335( PLCG1 , cytoplasm ) - 20.265953                                                              | 8 | 22.205557 |
| -> hsa:58480( RHOU , cytoplasm ) - 22.752059 -> hsa:5058( PAK1 , cytoplasm ) - 4.410487 -> hsa:2099( ESR1 , nucleus )                                                                                                                                                                              |   |           |
| hsa:5345( SERPINF2 , extracellular ) - 69.278180 -> hsa:5328( PLAU , extracellular ) - 32.655426 -> hsa:3082( HGF , extracellular ) - 3.247723 -> hsa:4233( MET , cytoplasm ) - 2.829073 -> hsa:5335( PLCG1 , cytoplasm ) - 20.265953                                                              | 8 | 22.205557 |
| -> hsa:58480( RHOU , cytoplasm ) - 22.752059 -> hsa:5058( PAK1 , cytoplasm ) - 4.410487 -> hsa:2099( ESR1 , nucleus )                                                                                                                                                                              |   |           |
| hsa:5269( SERPINB6 , extracellular ) - 69.278180 -> hsa:5328( PLAU , extracellular ) - 32.655426 -> hsa:3082( HGF , extracellular ) - 3.247723 -> hsa:4233( MET , cytoplasm ) - 2.829073 -> hsa:5335( PLCG1 , cytoplasm ) - 20.265953                                                              | 8 | 22.205557 |
| -> hsa:58480( RHOU , cytoplasm ) - 22.752059 -> hsa:5058( PAK1 , cytoplasm ) - 4.410487 -> hsa:2099( ESR1 , nucleus )                                                                                                                                                                              |   |           |
| hsa:5104( SERPINA5 , extracellular ) - 69.278180 -> hsa:5328( PLAU , extracellular ) - 32.655426 -> hsa:3082( HGF , extracellular ) - 3.247723 -> hsa:4233( MET , cytoplasm ) - 2.829073 -> hsa:5335( PLCG1 , cytoplasm ) - 20.265953                                                              | 8 | 22.205557 |
| -> hsa:58480( RHOU , cytoplasm ) - 22.752059 -> hsa:5058( PAK1 , cytoplasm ) - 4.410487 -> hsa:2099( ESR1 , nucleus )                                                                                                                                                                              |   |           |
| hsa:5055( SERPINB2 , extracellular ) - 69.278180 -> hsa:5328( PLAU , extracellular ) - 32.655426 -> hsa:3082( HGF , extracellular ) - 3.247723 -> hsa:4233( MET , cytoplasm ) - 2.829073 -> hsa:5335( PLCG1 , cytoplasm ) - 20.265953                                                              | 8 | 22.205557 |
| -> hsa:58480( RHOU , cytoplasm ) - 22.752059 -> hsa:5058( PAK1 , cytoplasm ) - 4.410487 -> hsa:2099( ESR1 , nucleus )                                                                                                                                                                              |   |           |
| hsa:654( BMP6 , extracellular ) - 65.460916 -> hsa:658( BMPR1B , cytoplasm ) - 2.071011 -> hsa:1123( CHN1 , cytoplasm ) - 33.843739 -> hsa:5879( RAC1 , golgi ) - 15.788264 -> hsa:5058( PAK1 , cytoplasm ) - 7.217161 -> hsa:90( ACVR1 , cytoplasm ) - 8.820974 -> hsa:7311( UBA52 , nucleus )    | 7 | 22.200344 |
| hsa:654( BMP6 , extracellular ) - 65.460916 -> hsa:658( BMPR1B , cytoplasm ) - 2.071011 -> hsa:1123( CHN1 , cytoplasm ) - 33.843739 -> hsa:5879( RAC1 , golgi ) - 15.788264 -> hsa:5058( PAK1 , cytoplasm ) - 7.217161 -> hsa:9641( IKBKE , cytoplasm ) - 8.820974 -> hsa:10291( SF3A1 , nucleus ) | 7 | 22.200344 |
| hsa:5054( SERPINE1 , extracellular ) - 69.278180 -> hsa:5328( PLAU , extracellular ) - 32.655426 -> hsa:3082( HGF , extracellular ) - 3.247723 -> hsa:4233( MET , cytoplasm ) - 2.373007 -> hsa:7409( VAV1 , cytoplasm ) - 29.522727                                                               | 8 | 22.199189 |
| -> hsa:3265( HRAS , cytoplasm ) - 2.145471 -> hsa:5599( MAPK8 , cytoplasm ) - 16.171787 -> hsa:7157( TP53 , nucleus )                                                                                                                                                                              |   |           |
| hsa:5345( SERPINF2 , extracellular ) - 69.278180 -> hsa:5328( PLAU , extracellular ) - 32.655426 -> hsa:3082( HGF , extracellular ) - 3.247723 -> hsa:4233( MET , cytoplasm ) - 2.373007 -> hsa:7409( VAV1 , cytoplasm ) - 29.522727                                                               | 8 | 22.199189 |
| -> hsa:3265( HRAS , cytoplasm ) - 2.145471 -> hsa:5599( MAPK8 , cytoplasm ) - 16.171787 -> hsa:7157( TP53 , nucleus )                                                                                                                                                                              |   |           |
| hsa:5269( SERPINB6 , extracellular ) - 69.278180 -> hsa:5328( PLAU , extracellular ) - 32.655426 -> hsa:3082( HGF , extracellular ) - 3.247723 -> hsa:4233( MET , cytoplasm ) - 2.373007 -> hsa:7409( VAV1 , cytoplasm ) - 29.522727                                                               | 8 | 22.199189 |
| -> hsa:3265( HRAS , cytoplasm ) - 2.145471 -> hsa:5599( MAPK8 , cytoplasm ) - 16.171787 -> hsa:7157( TP53 , nucleus )                                                                                                                                                                              |   |           |
| hsa:5104( SERPINA5 , extracellular ) - 69.278180 -> hsa:5328( PLAU , extracellular ) - 32.655426 -> hsa:3082( HGF , extracellular ) - 3.247723 -> hsa:4233( MET , cytoplasm ) - 2.373007 -> hsa:7409( VAV1 , cytoplasm ) - 29.522727                                                               | 8 | 22.199189 |
| -> hsa:3265( HRAS , cytoplasm ) - 2.145471 -> hsa:5599( MAPK8 , cytoplasm ) - 16.171787 -> hsa:7157( TP53 , nucleus )                                                                                                                                                                              |   |           |
| hsa:5055( SERPINB2 , extracellular ) - 69.278180 -> hsa:5328( PLAU , extracellular ) - 32.655426 -> hsa:3082( HGF , extracellular ) - 3.247723 -> hsa:4233( MET , cytoplasm ) - 2.373007 -> hsa:7409( VAV1 , cytoplasm ) - 29.522727                                                               | 8 | 22.199189 |
| -> hsa:3265( HRAS , cytoplasm ) - 2.145471 -> hsa:5599( MAPK8 , cytoplasm ) - 16.171787 -> hsa:7157( TP53 , nucleus )                                                                                                                                                                              |   |           |
| hsa:3625( INHBB , extracellular ) - 65.460916 -> hsa:90( ACVR1 , cytoplasm ) - 2.071011 -> hsa:1123( CHN1 , cytoplasm ) - 33.843739 -> hsa:5879( RAC1 , golgi ) - 15.788264 -> hsa:5058( PAK1 , cytoplasm ) - 2.738090 -> hsa:5580( PRKCD , cytoplasm ) - 13.231462 -> hsa:5591( PRKDC , nucleus ) | 7 | 22.188914 |
| hsa:3626( INHBC , extracellular ) - 65.460916 -> hsa:90( ACVR1 , cytoplasm ) - 2.071011 -> hsa:1123( CHN1 , cytoplasm )                                                                                                                                                                            | 7 | 22.188914 |



|                                                                                                                                                                                                                                                                                                                                                                                                                                            |    |           |
|--------------------------------------------------------------------------------------------------------------------------------------------------------------------------------------------------------------------------------------------------------------------------------------------------------------------------------------------------------------------------------------------------------------------------------------------|----|-----------|
| cytoplasm ) - 13.231462 -> hsa:5591( PRKDC , nucleus )                                                                                                                                                                                                                                                                                                                                                                                     |    |           |
| hsa:5054( SERPINE1 , extracellular ) - 69.278180 -> hsa:5328( PLAU , extracellular ) - 32.655426 -> hsa:3082( HGF , extracellular ) - 3.247723 -> hsa:4233( MET , cytoplasm ) - 2.373007 -> hsa:7409( VAV1 , cytoplasm ) - 29.522727 -> hsa:3265( HRAS , cytoplasm ) - 2.145471 -> hsa:5599( MAPK8 , cytoplasm ) - 13.231462 -> hsa:5591( PRKDC , nucleus )                                                                                | 8  | 21.779142 |
| hsa:5345( SERPINF2 , extracellular ) - 69.278180 -> hsa:5328( PLAU , extracellular ) - 32.655426 -> hsa:3082( HGF , extracellular ) - 3.247723 -> hsa:4233( MET , cytoplasm ) - 2.373007 -> hsa:7409( VAV1 , cytoplasm ) - 29.522727 -> hsa:3265( HRAS , cytoplasm ) - 2.145471 -> hsa:5599( MAPK8 , cytoplasm ) - 13.231462 -> hsa:5591( PRKDC , nucleus )                                                                                | 8  | 21.779142 |
| hsa:5269( SERPINB6 , extracellular ) - 69.278180 -> hsa:5328( PLAU , extracellular ) - 32.655426 -> hsa:3082( HGF , extracellular ) - 3.247723 -> hsa:4233( MET , cytoplasm ) - 2.373007 -> hsa:7409( VAV1 , cytoplasm ) - 29.522727 -> hsa:3265( HRAS , cytoplasm ) - 2.145471 -> hsa:5599( MAPK8 , cytoplasm ) - 13.231462 -> hsa:5591( PRKDC , nucleus )                                                                                | 8  | 21.779142 |
| hsa:5104( SERPINA5 , extracellular ) - 69.278180 -> hsa:5328( PLAU , extracellular ) - 32.655426 -> hsa:3082( HGF , extracellular ) - 3.247723 -> hsa:4233( MET , cytoplasm ) - 2.373007 -> hsa:7409( VAV1 , cytoplasm ) - 29.522727 -> hsa:3265( HRAS , cytoplasm ) - 2.145471 -> hsa:5599( MAPK8 , cytoplasm ) - 13.231462 -> hsa:5591( PRKDC , nucleus )                                                                                | 8  | 21.779142 |
| hsa:5055( SERPINB2 , extracellular ) - 69.278180 -> hsa:5328( PLAU , extracellular ) - 32.655426 -> hsa:3082( HGF , extracellular ) - 3.247723 -> hsa:4233( MET , cytoplasm ) - 2.373007 -> hsa:7409( VAV1 , cytoplasm ) - 29.522727 -> hsa:3265( HRAS , cytoplasm ) - 2.145471 -> hsa:5599( MAPK8 , cytoplasm ) - 13.231462 -> hsa:5591( PRKDC , nucleus )                                                                                | 8  | 21.779142 |
| hsa:5054( SERPINE1 , extracellular ) - 69.278180 -> hsa:5328( PLAU , extracellular ) - 32.655426 -> hsa:3082( HGF , extracellular ) - 3.247723 -> hsa:4233( MET , cytoplasm ) - 2.373007 -> hsa:7409( VAV1 , cytoplasm ) - 29.522727 -> hsa:387( RHOA , cytoplasm ) - 12.711560 -> hsa:5585( PKN1 , cytoplasm ) - 2.205244 -> hsa:905( CCNT2 , nucleus )                                                                                   | 8  | 21.71341  |
| hsa:5345( SERPINF2 , extracellular ) - 69.278180 -> hsa:5328( PLAU , extracellular ) - 32.655426 -> hsa:3082( HGF , extracellular ) - 3.247723 -> hsa:4233( MET , cytoplasm ) - 2.373007 -> hsa:7409( VAV1 , cytoplasm ) - 29.522727 -> hsa:387( RHOA , cytoplasm ) - 12.711560 -> hsa:5585( PKN1 , cytoplasm ) - 2.205244 -> hsa:905( CCNT2 , nucleus )                                                                                   | 8  | 21.71341  |
| hsa:5269( SERPINB6 , extracellular ) - 69.278180 -> hsa:5328( PLAU , extracellular ) - 32.655426 -> hsa:3082( HGF , extracellular ) - 3.247723 -> hsa:4233( MET , cytoplasm ) - 2.373007 -> hsa:7409( VAV1 , cytoplasm ) - 29.522727 -> hsa:387( RHOA , cytoplasm ) - 12.711560 -> hsa:5585( PKN1 , cytoplasm ) - 2.205244 -> hsa:905( CCNT2 , nucleus )                                                                                   | 8  | 21.71341  |
| hsa:5104( SERPINA5 , extracellular ) - 69.278180 -> hsa:5328( PLAU , extracellular ) - 32.655426 -> hsa:3082( HGF , extracellular ) - 3.247723 -> hsa:4233( MET , cytoplasm ) - 2.373007 -> hsa:7409( VAV1 , cytoplasm ) - 29.522727 -> hsa:387( RHOA , cytoplasm ) - 12.711560 -> hsa:5585( PKN1 , cytoplasm ) - 2.205244 -> hsa:905( CCNT2 , nucleus )                                                                                   | 8  | 21.71341  |
| hsa:5055( SERPINB2 , extracellular ) - 69.278180 -> hsa:5328( PLAU , extracellular ) - 32.655426 -> hsa:3082( HGF , extracellular ) - 3.247723 -> hsa:4233( MET , cytoplasm ) - 2.373007 -> hsa:7409( VAV1 , cytoplasm ) - 29.522727 -> hsa:387( RHOA , cytoplasm ) - 12.711560 -> hsa:5585( PKN1 , cytoplasm ) - 2.205244 -> hsa:905( CCNT2 , nucleus )                                                                                   | 8  | 21.71341  |
| hsa:654( BMP6 , extracellular ) - 65.460916 -> hsa:658( BMPR1B , cytoplasm ) - 2.524005 -> hsa:9459( ARHGEF6 , cytoplasm ) - 29.522727 -> hsa:998( CDC42 , cytoplasm ) - 8.259484 -> hsa:23048( FNBP1 , cytoplasm ) - 2.692116 -> hsa:8658( TNKS , nucleus )                                                                                                                                                                               | 6  | 21.69185  |
| hsa:5054( SERPINE1 , extracellular ) - 69.278180 -> hsa:5328( PLAU , extracellular ) - 32.655426 -> hsa:3082( HGF , extracellular ) - 3.247723 -> hsa:4233( MET , cytoplasm ) - 2.373007 -> hsa:7409( VAV1 , cytoplasm ) - 29.522727 -> hsa:5879( RAC1 , golgi ) - 43.073849 -> hsa:7454( WAS , cytoplasm ) - 7.217161 -> hsa:1457( CSNK2A1 , cytoplasm ) - 3.320395 -> hsa:4150( MAZ , nucleus ) - 4.506367 -> hsa:2186( BPTF , nucleus ) | 10 | 21.688315 |
| hsa:5345( SERPINF2 , extracellular ) - 69.278180 -> hsa:5328( PLAU , extracellular ) - 32.655426 -> hsa:3082( HGF , extracellular ) - 3.247723 -> hsa:4233( MET , cytoplasm ) - 2.373007 -> hsa:7409( VAV1 , cytoplasm ) - 29.522727 -> hsa:5879( RAC1 , golgi ) - 43.073849 -> hsa:7454( WAS , cytoplasm ) - 7.217161 -> hsa:1457( CSNK2A1 , cytoplasm ) - 3.320395 -> hsa:4150( MAZ , nucleus ) - 4.506367 -> hsa:2186( BPTF , nucleus ) | 10 | 21.688315 |
| hsa:5269( SERPINB6 , extracellular ) - 69.278180 -> hsa:5328( PLAU , extracellular ) - 32.655426 -> hsa:3082( HGF , extracellular ) - 3.247723 -> hsa:4233( MET , cytoplasm ) - 2.373007 -> hsa:7409( VAV1 , cytoplasm ) - 29.522727                                                                                                                                                                                                       | 10 | 21.688315 |

|                                                                                                                                                                                                                                                                                                                                                                                                                                                     |    |           |
|-----------------------------------------------------------------------------------------------------------------------------------------------------------------------------------------------------------------------------------------------------------------------------------------------------------------------------------------------------------------------------------------------------------------------------------------------------|----|-----------|
| -> hsa:5879( RAC1 , golgi ) - 43.073849 -> hsa:7454( WAS , cytoplasm ) - 7.217161 -> hsa:1457( CSNK2A1 , cytoplasm )<br>- 3.320395 -> hsa:4150( MAZ , nucleus ) - 4.506367 -> hsa:2186( BPTF , nucleus )                                                                                                                                                                                                                                            |    |           |
| hsa:5104( SERPINA5 , extracellular ) - 69.278180 -> hsa:5328( PLAU , extracellular ) - 32.655426 -> hsa:3082( HGF ,<br>extracellular ) - 3.247723 -> hsa:4233( MET , cytoplasm ) - 2.373007 -> hsa:7409( VAV1 , cytoplasm ) - 29.522727<br>-> hsa:5879( RAC1 , golgi ) - 43.073849 -> hsa:7454( WAS , cytoplasm ) - 7.217161 -> hsa:1457( CSNK2A1 , cytoplasm )<br>- 3.320395 -> hsa:4150( MAZ , nucleus ) - 4.506367 -> hsa:2186( BPTF , nucleus ) | 10 | 21.688315 |
| hsa:5055( SERPINB2 , extracellular ) - 69.278180 -> hsa:5328( PLAU , extracellular ) - 32.655426 -> hsa:3082( HGF ,<br>extracellular ) - 3.247723 -> hsa:4233( MET , cytoplasm ) - 2.373007 -> hsa:7409( VAV1 , cytoplasm ) - 29.522727<br>-> hsa:5879( RAC1 , golgi ) - 43.073849 -> hsa:7454( WAS , cytoplasm ) - 7.217161 -> hsa:1457( CSNK2A1 , cytoplasm )<br>- 3.320395 -> hsa:4150( MAZ , nucleus ) - 4.506367 -> hsa:2186( BPTF , nucleus ) | 10 | 21.688315 |
| hsa:5054( SERPINE1 , extracellular ) - 69.278180 -> hsa:5328( PLAU , extracellular ) - 32.655426 -> hsa:3082( HGF ,<br>extracellular ) - 3.247723 -> hsa:4233( MET , cytoplasm ) - 2.829073 -> hsa:5335( PLCG1 , cytoplasm ) - 20.265953<br>-> hsa:58480( RHOU , cytoplasm ) - 22.752059 -> hsa:5058( PAK1 , cytoplasm ) - 3.913667 -> hsa:207( AKT1 , cytoplasm )<br>- 18.468916 -> hsa:3064( HD , nucleus )                                       | 9  | 21.676375 |
| hsa:5345( SERPINF2 , extracellular ) - 69.278180 -> hsa:5328( PLAU , extracellular ) - 32.655426 -> hsa:3082( HGF ,<br>extracellular ) - 3.247723 -> hsa:4233( MET , cytoplasm ) - 2.829073 -> hsa:5335( PLCG1 , cytoplasm ) - 20.265953<br>-> hsa:58480( RHOU , cytoplasm ) - 22.752059 -> hsa:5058( PAK1 , cytoplasm ) - 3.913667 -> hsa:207( AKT1 , cytoplasm )<br>- 18.468916 -> hsa:3064( HD , nucleus )                                       | 9  | 21.676375 |
| hsa:5269( SERPINB6 , extracellular ) - 69.278180 -> hsa:5328( PLAU , extracellular ) - 32.655426 -> hsa:3082( HGF ,<br>extracellular ) - 3.247723 -> hsa:4233( MET , cytoplasm ) - 2.829073 -> hsa:5335( PLCG1 , cytoplasm ) - 20.265953<br>-> hsa:58480( RHOU , cytoplasm ) - 22.752059 -> hsa:5058( PAK1 , cytoplasm ) - 3.913667 -> hsa:207( AKT1 , cytoplasm )<br>- 18.468916 -> hsa:3064( HD , nucleus )                                       | 9  | 21.676375 |
| hsa:5104( SERPINA5 , extracellular ) - 69.278180 -> hsa:5328( PLAU , extracellular ) - 32.655426 -> hsa:3082( HGF ,<br>extracellular ) - 3.247723 -> hsa:4233( MET , cytoplasm ) - 2.829073 -> hsa:5335( PLCG1 , cytoplasm ) - 20.265953<br>-> hsa:58480( RHOU , cytoplasm ) - 22.752059 -> hsa:5058( PAK1 , cytoplasm ) - 3.913667 -> hsa:207( AKT1 , cytoplasm )<br>- 18.468916 -> hsa:3064( HD , nucleus )                                       | 9  | 21.676375 |
| hsa:5055( SERPINB2 , extracellular ) - 69.278180 -> hsa:5328( PLAU , extracellular ) - 32.655426 -> hsa:3082( HGF ,<br>extracellular ) - 3.247723 -> hsa:4233( MET , cytoplasm ) - 2.829073 -> hsa:5335( PLCG1 , cytoplasm ) - 20.265953<br>-> hsa:58480( RHOU , cytoplasm ) - 22.752059 -> hsa:5058( PAK1 , cytoplasm ) - 3.913667 -> hsa:207( AKT1 , cytoplasm )<br>- 18.468916 -> hsa:3064( HD , nucleus )                                       | 9  | 21.676375 |
| hsa:654( BMP6 , extracellular ) - 65.460916 -> hsa:658( BMPR1B , cytoplasm ) - 2.071011 -> hsa:1123( CHN1 , cytoplasm )<br>- 33.843739 -> hsa:5879( RAC1 , golgi ) - 15.788264 -> hsa:5062( PAK2 , cytoplasm ) - 7.217161 -> hsa:5594( MAPK1 ,<br>cytoplasm ) - 5.390596 -> hsa:4286( MITF , nucleus )                                                                                                                                              | 7  | 21.628614 |
| hsa:3625( INHBB , extracellular ) - 65.460916 -> hsa:90( ACVR1 , cytoplasm ) - 2.071011 -> hsa:1123( CHN1 , cytoplasm )<br>- 33.843739 -> hsa:5879( RAC1 , golgi ) - 15.788264 -> hsa:5062( PAK2 , cytoplasm ) - 7.217161 -> hsa:5594( MAPK1 ,<br>cytoplasm ) - 5.390596 -> hsa:7175( TPR , nucleus )                                                                                                                                               | 7  | 21.628614 |
| hsa:3625( INHBB , extracellular ) - 65.460916 -> hsa:90( ACVR1 , cytoplasm ) - 2.071011 -> hsa:1123( CHN1 , cytoplasm )<br>- 33.843739 -> hsa:5879( RAC1 , golgi ) - 15.788264 -> hsa:5062( PAK2 , cytoplasm ) - 7.217161 -> hsa:5594( MAPK1 ,<br>cytoplasm ) - 5.390596 -> hsa:2353( FOS , nucleus )                                                                                                                                               | 7  | 21.628614 |
| hsa:3626( INHBC , extracellular ) - 65.460916 -> hsa:90( ACVR1 , cytoplasm ) - 2.071011 -> hsa:1123( CHN1 , cytoplasm )<br>- 33.843739 -> hsa:5879( RAC1 , golgi ) - 15.788264 -> hsa:5062( PAK2 , cytoplasm ) - 7.217161 -> hsa:5594( MAPK1 ,<br>cytoplasm ) - 5.390596 -> hsa:7175( TPR , nucleus )                                                                                                                                               | 7  | 21.628614 |
| hsa:3626( INHBC , extracellular ) - 65.460916 -> hsa:90( ACVR1 , cytoplasm ) - 2.071011 -> hsa:1123( CHN1 , cytoplasm )<br>- 33.843739 -> hsa:5879( RAC1 , golgi ) - 15.788264 -> hsa:5062( PAK2 , cytoplasm ) - 7.217161 -> hsa:5594( MAPK1 ,                                                                                                                                                                                                      | 7  | 21.628614 |

|                                                                                                                                                                                                                                                                                                                                                         |   |           |
|---------------------------------------------------------------------------------------------------------------------------------------------------------------------------------------------------------------------------------------------------------------------------------------------------------------------------------------------------------|---|-----------|
| cytoplasm ) - 5.390596 -> hsa:2353( FOS , nucleus )                                                                                                                                                                                                                                                                                                     |   |           |
| hsa:654( BMP6 , extracellular ) - 65.460916 -> hsa:658( BMPR1B , cytoplasm ) - 2.071011 -> hsa:1123( CHN1 , cytoplasm )                                                                                                                                                                                                                                 |   |           |
| - 33.843739 -> hsa:5879( RAC1 , golgi ) - 2.145471 -> hsa:5578( PRKCA , cytoplasm ) - 4.410487 -> hsa:5465( PPARA , nucleus )                                                                                                                                                                                                                           | 6 | 21.586325 |
| hsa:654( BMP6 , extracellular ) - 65.460916 -> hsa:658( BMPR1B , cytoplasm ) - 2.071011 -> hsa:1123( CHN1 , cytoplasm )                                                                                                                                                                                                                                 |   |           |
| - 33.843739 -> hsa:5879( RAC1 , golgi ) - 2.145471 -> hsa:6198( RPS6KB1 , cytoplasm ) - 4.410487 -> hsa:84271( POLDIP3 , nucleus )                                                                                                                                                                                                                      | 6 | 21.586325 |
| hsa:654( BMP6 , extracellular ) - 65.460916 -> hsa:658( BMPR1B , cytoplasm ) - 2.071011 -> hsa:1123( CHN1 , cytoplasm )                                                                                                                                                                                                                                 |   |           |
| - 33.843739 -> hsa:5879( RAC1 , golgi ) - 2.145471 -> hsa:5578( PRKCA , cytoplasm ) - 4.410487 -> hsa:5914( RARA , nucleus )                                                                                                                                                                                                                            | 6 | 21.586325 |
| hsa:3625( INHBB , extracellular ) - 65.460916 -> hsa:90( ACVR1 , cytoplasm ) - 2.071011 -> hsa:1123( CHN1 , cytoplasm )                                                                                                                                                                                                                                 |   |           |
| - 33.843739 -> hsa:5879( RAC1 , golgi ) - 2.145471 -> hsa:5578( PRKCA , cytoplasm ) - 4.410487 -> hsa:5465( PPARA , nucleus )                                                                                                                                                                                                                           | 6 | 21.586325 |
| hsa:3625( INHBB , extracellular ) - 65.460916 -> hsa:90( ACVR1 , cytoplasm ) - 2.071011 -> hsa:1123( CHN1 , cytoplasm )                                                                                                                                                                                                                                 |   |           |
| - 33.843739 -> hsa:5879( RAC1 , golgi ) - 2.145471 -> hsa:6198( RPS6KB1 , cytoplasm ) - 4.410487 -> hsa:84271( POLDIP3 , nucleus )                                                                                                                                                                                                                      | 6 | 21.586325 |
| hsa:3625( INHBB , extracellular ) - 65.460916 -> hsa:90( ACVR1 , cytoplasm ) - 2.071011 -> hsa:1123( CHN1 , cytoplasm )                                                                                                                                                                                                                                 |   |           |
| - 33.843739 -> hsa:5879( RAC1 , golgi ) - 2.145471 -> hsa:5578( PRKCA , cytoplasm ) - 4.410487 -> hsa:5914( RARA , nucleus )                                                                                                                                                                                                                            | 6 | 21.586325 |
| hsa:3626( INHBC , extracellular ) - 65.460916 -> hsa:90( ACVR1 , cytoplasm ) - 2.071011 -> hsa:1123( CHN1 , cytoplasm )                                                                                                                                                                                                                                 |   |           |
| - 33.843739 -> hsa:5879( RAC1 , golgi ) - 2.145471 -> hsa:5578( PRKCA , cytoplasm ) - 4.410487 -> hsa:5465( PPARA , nucleus )                                                                                                                                                                                                                           | 6 | 21.586325 |
| hsa:3626( INHBC , extracellular ) - 65.460916 -> hsa:90( ACVR1 , cytoplasm ) - 2.071011 -> hsa:1123( CHN1 , cytoplasm )                                                                                                                                                                                                                                 |   |           |
| - 33.843739 -> hsa:5879( RAC1 , golgi ) - 2.145471 -> hsa:6198( RPS6KB1 , cytoplasm ) - 4.410487 -> hsa:84271( POLDIP3 , nucleus )                                                                                                                                                                                                                      | 6 | 21.586325 |
| hsa:3626( INHBC , extracellular ) - 65.460916 -> hsa:90( ACVR1 , cytoplasm ) - 2.071011 -> hsa:1123( CHN1 , cytoplasm )                                                                                                                                                                                                                                 |   |           |
| - 33.843739 -> hsa:5879( RAC1 , golgi ) - 2.145471 -> hsa:5578( PRKCA , cytoplasm ) - 4.410487 -> hsa:5914( RARA , nucleus )                                                                                                                                                                                                                            | 6 | 21.586325 |
| hsa:12( SERPINA3 , extracellular ) - 69.278180 -> hsa:4485( MST1 , extracellular ) - 3.247723 -> hsa:4486( MST1R , cytoplasm ) - 2.829073 -> hsa:5335( PLCG1 , cytoplasm ) - 12.338863 -> hsa:28964( GIT1 , cytoplasm ) - 19.664149 -> hsa:580( BARD1 , nucleus ) - 19.664149 -> hsa:672( BRCA1 , nucleus ) - 24.033959 -> hsa:5887( RAD23B , nucleus ) | 8 | 21.579442 |
| hsa:654( BMP6 , extracellular ) - 65.460916 -> hsa:658( BMPR1B , cytoplasm ) - 2.071011 -> hsa:1123( CHN1 , cytoplasm )                                                                                                                                                                                                                                 |   |           |
| - 33.843739 -> hsa:5879( RAC1 , golgi ) - 15.788264 -> hsa:5058( PAK1 , cytoplasm ) - 7.217161 -> hsa:90( ACVR1 , cytoplasm ) - 4.410487 -> hsa:7068( THRB , nucleus )                                                                                                                                                                                  | 7 | 21.465263 |
| hsa:654( BMP6 , extracellular ) - 65.460916 -> hsa:658( BMPR1B , cytoplasm ) - 2.071011 -> hsa:1123( CHN1 , cytoplasm )                                                                                                                                                                                                                                 |   |           |
| - 33.843739 -> hsa:5879( RAC1 , golgi ) - 15.788264 -> hsa:5058( PAK1 , cytoplasm ) - 7.217161 -> hsa:90( ACVR1 , cytoplasm ) - 4.410487 -> hsa:7421( VDR , nucleus )                                                                                                                                                                                   | 7 | 21.465263 |
| hsa:654( BMP6 , extracellular ) - 65.460916 -> hsa:658( BMPR1B , cytoplasm ) - 2.071011 -> hsa:1123( CHN1 , cytoplasm )                                                                                                                                                                                                                                 |   |           |
| - 33.843739 -> hsa:5879( RAC1 , golgi ) - 15.788264 -> hsa:5058( PAK1 , cytoplasm ) - 7.217161 -> hsa:5594( MAPK1 , cytoplasm ) - 4.410487 -> hsa:2908( NR3C1 , nucleus )                                                                                                                                                                               | 7 | 21.465263 |
| hsa:654( BMP6 , extracellular ) - 65.460916 -> hsa:658( BMPR1B , cytoplasm ) - 2.071011 -> hsa:1123( CHN1 , cytoplasm )                                                                                                                                                                                                                                 |   |           |
| - 33.843739 -> hsa:5879( RAC1 , golgi ) - 15.788264 -> hsa:5058( PAK1 , cytoplasm ) - 7.217161 -> hsa:9641( IKBKE , cytoplasm ) - 4.410487 -> hsa:3187( HNRPH1 , nucleus )                                                                                                                                                                              | 7 | 21.465263 |
| hsa:654( BMP6 , extracellular ) - 65.460916 -> hsa:658( BMPR1B , cytoplasm ) - 2.071011 -> hsa:1123( CHN1 , cytoplasm )                                                                                                                                                                                                                                 |   |           |
| - 33.843739 -> hsa:5879( RAC1 , golgi ) - 15.788264 -> hsa:5058( PAK1 , cytoplasm ) - 7.217161 -> hsa:1123( CHN1 , cytoplasm )                                                                                                                                                                                                                          | 7 | 21.465263 |





|                                                                                                                                                                              |   |           |
|------------------------------------------------------------------------------------------------------------------------------------------------------------------------------|---|-----------|
| hsa:3625( INHBB , extracellular ) - 65.460916 -> hsa:90( ACVR1 , cytoplasm ) - 2.071011 -> hsa:1123( CHN1 , cytoplasm )                                                      |   |           |
| - 33.843739 -> hsa:5879( RAC1 , golgi ) - 15.788264 -> hsa:5058( PAK1 , cytoplasm ) - 7.217161 -> hsa:9641( IKBKE , cytoplasm ) - 4.410487 -> hsa:6629( SNRPB2 , nucleus )   | 7 | 21.465263 |
| hsa:3626( INHBC , extracellular ) - 65.460916 -> hsa:90( ACVR1 , cytoplasm ) - 2.071011 -> hsa:1123( CHN1 , cytoplasm )                                                      |   |           |
| - 33.843739 -> hsa:5879( RAC1 , golgi ) - 15.788264 -> hsa:5058( PAK1 , cytoplasm ) - 7.217161 -> hsa:1020( CDK5 , cytoplasm ) - 4.410487 -> hsa:1027( CDKN1B , nucleus )    | 7 | 21.465263 |
| hsa:3626( INHBC , extracellular ) - 65.460916 -> hsa:90( ACVR1 , cytoplasm ) - 2.071011 -> hsa:1123( CHN1 , cytoplasm )                                                      |   |           |
| - 33.843739 -> hsa:5879( RAC1 , golgi ) - 15.788264 -> hsa:5062( PAK2 , cytoplasm ) - 7.217161 -> hsa:5594( MAPK1 , cytoplasm ) - 4.410487 -> hsa:367( AR , nucleus )        | 7 | 21.465263 |
| hsa:3626( INHBC , extracellular ) - 65.460916 -> hsa:90( ACVR1 , cytoplasm ) - 2.071011 -> hsa:1123( CHN1 , cytoplasm )                                                      |   |           |
| - 33.843739 -> hsa:5879( RAC1 , golgi ) - 15.788264 -> hsa:5058( PAK1 , cytoplasm ) - 7.217161 -> hsa:9641( IKBKE , cytoplasm ) - 4.410487 -> hsa:10492( SYNCRIP , nucleus ) | 7 | 21.465263 |
| hsa:3626( INHBC , extracellular ) - 65.460916 -> hsa:90( ACVR1 , cytoplasm ) - 2.071011 -> hsa:1123( CHN1 , cytoplasm )                                                      |   |           |
| - 33.843739 -> hsa:5879( RAC1 , golgi ) - 15.788264 -> hsa:5058( PAK1 , cytoplasm ) - 7.217161 -> hsa:9641( IKBKE , cytoplasm ) - 4.410487 -> hsa:3187( HNRPH1 , nucleus )   | 7 | 21.465263 |
| hsa:3626( INHBC , extracellular ) - 65.460916 -> hsa:90( ACVR1 , cytoplasm ) - 2.071011 -> hsa:1123( CHN1 , cytoplasm )                                                      |   |           |
| - 33.843739 -> hsa:5879( RAC1 , golgi ) - 15.788264 -> hsa:5058( PAK1 , cytoplasm ) - 7.217161 -> hsa:9641( IKBKE , cytoplasm ) - 4.410487 -> hsa:10146( G3BP1 , nucleus )   | 7 | 21.465263 |
| hsa:3626( INHBC , extracellular ) - 65.460916 -> hsa:90( ACVR1 , cytoplasm ) - 2.071011 -> hsa:1123( CHN1 , cytoplasm )                                                      |   |           |
| - 33.843739 -> hsa:5879( RAC1 , golgi ) - 15.788264 -> hsa:5058( PAK1 , cytoplasm ) - 7.217161 -> hsa:9641( IKBKE , cytoplasm ) - 4.410487 -> hsa:4670( HNRPM , nucleus )    | 7 | 21.465263 |
| hsa:3626( INHBC , extracellular ) - 65.460916 -> hsa:90( ACVR1 , cytoplasm ) - 2.071011 -> hsa:1123( CHN1 , cytoplasm )                                                      |   |           |
| - 33.843739 -> hsa:5879( RAC1 , golgi ) - 15.788264 -> hsa:5058( PAK1 , cytoplasm ) - 7.217161 -> hsa:9641( IKBKE , cytoplasm ) - 4.410487 -> hsa:10642( IGF2BP1 , nucleus ) | 7 | 21.465263 |
| hsa:3626( INHBC , extracellular ) - 65.460916 -> hsa:90( ACVR1 , cytoplasm ) - 2.071011 -> hsa:1123( CHN1 , cytoplasm )                                                      |   |           |
| - 33.843739 -> hsa:5879( RAC1 , golgi ) - 15.788264 -> hsa:5058( PAK1 , cytoplasm ) - 7.217161 -> hsa:9641( IKBKE , cytoplasm ) - 4.410487 -> hsa:51639( SF3B14 , nucleus )  | 7 | 21.465263 |
| hsa:3626( INHBC , extracellular ) - 65.460916 -> hsa:90( ACVR1 , cytoplasm ) - 2.071011 -> hsa:1123( CHN1 , cytoplasm )                                                      |   |           |
| - 33.843739 -> hsa:5879( RAC1 , golgi ) - 15.788264 -> hsa:5058( PAK1 , cytoplasm ) - 7.217161 -> hsa:9641( IKBKE , cytoplasm ) - 4.410487 -> hsa:6629( SNRPB2 , nucleus )   | 7 | 21.465263 |
| hsa:654( BMP6 , extracellular ) - 65.460916 -> hsa:658( BMPR1B , cytoplasm ) - 2.071011 -> hsa:1123( CHN1 , cytoplasm )                                                      |   |           |
| - 33.843739 -> hsa:5879( RAC1 , golgi ) - 15.788264 -> hsa:5062( PAK2 , cytoplasm ) - 2.206641 -> hsa:6714( SRC , cytoplasm ) - 9.195643 -> hsa:2909( GRLF1 , nucleus )      | 7 | 21.427702 |
| hsa:3625( INHBB , extracellular ) - 65.460916 -> hsa:90( ACVR1 , cytoplasm ) - 2.071011 -> hsa:1123( CHN1 , cytoplasm )                                                      |   |           |
| - 33.843739 -> hsa:5879( RAC1 , golgi ) - 2.145471 -> hsa:5610( EIF2AK2 , nucleus ) - 8.820974 -> hsa:1147( CHUK , cytoplasm ) - 16.171787 -> hsa:7157( TP53 , nucleus )     | 7 | 21.418983 |
| hsa:654( BMP6 , extracellular ) - 65.460916 -> hsa:658( BMPR1B , cytoplasm ) - 2.071011 -> hsa:1123( CHN1 , cytoplasm )                                                      |   |           |
| - 33.843739 -> hsa:5879( RAC1 , golgi ) - 15.788264 -> hsa:5058( PAK1 , cytoplasm ) - 7.217161 -> hsa:9641( IKBKE , cytoplasm ) - 3.608580 -> hsa:2273( FHL1 , nucleus )     | 7 | 21.331612 |
| hsa:3625( INHBB , extracellular ) - 65.460916 -> hsa:90( ACVR1 , cytoplasm ) - 2.071011 -> hsa:1123( CHN1 , cytoplasm )                                                      |   |           |
| - 33.843739 -> hsa:5879( RAC1 , golgi ) - 15.788264 -> hsa:5058( PAK1 , cytoplasm ) - 7.217161 -> hsa:7046( TGFBR1 , cytoplasm ) - 3.608580 -> hsa:3987( LIMS1 , nucleus )   | 7 | 21.331612 |
| hsa:3625( INHBB , extracellular ) - 65.460916 -> hsa:90( ACVR1 , cytoplasm ) - 2.071011 -> hsa:1123( CHN1 , cytoplasm )                                                      |   |           |
| - 33.843739 -> hsa:5879( RAC1 , golgi ) - 15.788264 -> hsa:5058( PAK1 , cytoplasm ) - 7.217161 -> hsa:9641( IKBKE , cytoplasm )                                              | 7 | 21.331612 |

|                                                                                                                                                                             |   |           |
|-----------------------------------------------------------------------------------------------------------------------------------------------------------------------------|---|-----------|
| cytoplasm ) - 3.608580 -> hsa:2273( FHL1 , nucleus )                                                                                                                        |   |           |
| hsa:3626( INHBC , extracellular ) - 65.460916 -> hsa:90( ACVR1 , cytoplasm ) - 2.071011 -> hsa:1123( CHN1 , cytoplasm )                                                     |   |           |
| - 33.843739 -> hsa:5879( RAC1 , golgi ) - 15.788264 -> hsa:5058( PAK1 , cytoplasm ) - 7.217161 -> hsa:7046( TGFBR1 , cytoplasm ) - 3.608580 -> hsa:3987( LIMS1 , nucleus )  | 7 | 21.331612 |
| hsa:3626( INHBC , extracellular ) - 65.460916 -> hsa:90( ACVR1 , cytoplasm ) - 2.071011 -> hsa:1123( CHN1 , cytoplasm )                                                     |   |           |
| - 33.843739 -> hsa:5879( RAC1 , golgi ) - 15.788264 -> hsa:5058( PAK1 , cytoplasm ) - 7.217161 -> hsa:9641( IKBKE , cytoplasm ) - 3.608580 -> hsa:2273( FHL1 , nucleus )    | 7 | 21.331612 |
| hsa:654( BMP6 , extracellular ) - 65.460916 -> hsa:658( BMPR1B , cytoplasm ) - 2.071011 -> hsa:1123( CHN1 , cytoplasm )                                                     |   |           |
| - 33.843739 -> hsa:5879( RAC1 , golgi ) - 15.788264 -> hsa:5062( PAK2 , cytoplasm ) - 7.217161 -> hsa:5595( MAPK3 , nucleus ) - 3.320395 -> hsa:7553( ZNF7 , nucleus )      | 7 | 21.283581 |
| hsa:654( BMP6 , extracellular ) - 65.460916 -> hsa:658( BMPR1B , cytoplasm ) - 2.071011 -> hsa:1123( CHN1 , cytoplasm )                                                     |   |           |
| - 33.843739 -> hsa:5879( RAC1 , golgi ) - 15.788264 -> hsa:5058( PAK1 , cytoplasm ) - 7.217161 -> hsa:984( CDC2L1 , cytoplasm ) - 3.307866 -> hsa:896( CCND3 , nucleus )    | 7 | 21.281493 |
| hsa:3625( INHBB , extracellular ) - 65.460916 -> hsa:90( ACVR1 , cytoplasm ) - 2.071011 -> hsa:1123( CHN1 , cytoplasm )                                                     |   |           |
| - 33.843739 -> hsa:5879( RAC1 , golgi ) - 15.788264 -> hsa:5058( PAK1 , cytoplasm ) - 7.217161 -> hsa:984( CDC2L1 , cytoplasm ) - 3.307866 -> hsa:896( CCND3 , nucleus )    | 7 | 21.281493 |
| hsa:3626( INHBC , extracellular ) - 65.460916 -> hsa:90( ACVR1 , cytoplasm ) - 2.071011 -> hsa:1123( CHN1 , cytoplasm )                                                     |   |           |
| - 33.843739 -> hsa:5879( RAC1 , golgi ) - 15.788264 -> hsa:5058( PAK1 , cytoplasm ) - 7.217161 -> hsa:984( CDC2L1 , cytoplasm ) - 3.307866 -> hsa:896( CCND3 , nucleus )    | 7 | 21.281493 |
| hsa:654( BMP6 , extracellular ) - 65.460916 -> hsa:658( BMPR1B , cytoplasm ) - 2.071011 -> hsa:1123( CHN1 , cytoplasm )                                                     |   |           |
| - 33.843739 -> hsa:5879( RAC1 , golgi ) - 15.788264 -> hsa:5058( PAK1 , cytoplasm ) - 7.217161 -> hsa:7046( TGFBR1 , cytoplasm ) - 3.032210 -> hsa:130497( OSR1 , nucleus ) | 7 | 21.23555  |
| hsa:654( BMP6 , extracellular ) - 65.460916 -> hsa:658( BMPR1B , cytoplasm ) - 2.071011 -> hsa:1123( CHN1 , cytoplasm )                                                     |   |           |
| - 33.843739 -> hsa:5879( RAC1 , golgi ) - 15.788264 -> hsa:5058( PAK1 , cytoplasm ) - 7.217161 -> hsa:7048( TGFBR2 , cytoplasm ) - 3.032210 -> hsa:130497( OSR1 , nucleus ) | 7 | 21.23555  |
| hsa:3625( INHBB , extracellular ) - 65.460916 -> hsa:90( ACVR1 , cytoplasm ) - 2.071011 -> hsa:1123( CHN1 , cytoplasm )                                                     |   |           |
| - 33.843739 -> hsa:5879( RAC1 , golgi ) - 15.788264 -> hsa:5058( PAK1 , cytoplasm ) - 7.217161 -> hsa:7046( TGFBR1 , cytoplasm ) - 3.032210 -> hsa:130497( OSR1 , nucleus ) | 7 | 21.23555  |
| hsa:3626( INHBC , extracellular ) - 65.460916 -> hsa:90( ACVR1 , cytoplasm ) - 2.071011 -> hsa:1123( CHN1 , cytoplasm )                                                     |   |           |
| - 33.843739 -> hsa:5879( RAC1 , golgi ) - 15.788264 -> hsa:5058( PAK1 , cytoplasm ) - 7.217161 -> hsa:7046( TGFBR1 , cytoplasm ) - 3.032210 -> hsa:130497( OSR1 , nucleus ) | 7 | 21.23555  |
| hsa:654( BMP6 , extracellular ) - 65.460916 -> hsa:658( BMPR1B , cytoplasm ) - 2.071011 -> hsa:1123( CHN1 , cytoplasm )                                                     |   |           |
| - 33.843739 -> hsa:5879( RAC1 , golgi ) - 15.788264 -> hsa:5058( PAK1 , cytoplasm ) - 7.217161 -> hsa:1020( CDK5 , cytoplasm ) - 2.940325 -> hsa:894( CCND2 , nucleus )     | 7 | 21.220236 |
| hsa:3625( INHBB , extracellular ) - 65.460916 -> hsa:90( ACVR1 , cytoplasm ) - 2.071011 -> hsa:1123( CHN1 , cytoplasm )                                                     |   |           |
| - 33.843739 -> hsa:5879( RAC1 , golgi ) - 15.788264 -> hsa:5058( PAK1 , cytoplasm ) - 7.217161 -> hsa:1020( CDK5 , cytoplasm ) - 2.940325 -> hsa:894( CCND2 , nucleus )     | 7 | 21.220236 |
| hsa:3626( INHBC , extracellular ) - 65.460916 -> hsa:90( ACVR1 , cytoplasm ) - 2.071011 -> hsa:1123( CHN1 , cytoplasm )                                                     |   |           |
| - 33.843739 -> hsa:5879( RAC1 , golgi ) - 15.788264 -> hsa:5058( PAK1 , cytoplasm ) - 7.217161 -> hsa:1020( CDK5 , cytoplasm ) - 2.940325 -> hsa:894( CCND2 , nucleus )     | 7 | 21.220236 |
| hsa:3625( INHBB , extracellular ) - 65.460916 -> hsa:90( ACVR1 , cytoplasm ) - 8.820974 -> hsa:3551( IKKKB , cytoplasm )                                                    |   |           |
| - 3.032210 -> hsa:8517( IKKKG , nucleus ) - 4.506367 -> hsa:26994( RNF11 , cytoplasm ) - 24.033959 -> hsa:7316( unknown , nucleus )                                         | 6 | 21.170885 |
| hsa:3626( INHBC , extracellular ) - 65.460916 -> hsa:90( ACVR1 , cytoplasm ) - 8.820974 -> hsa:3551( IKKKB , cytoplasm )                                                    |   |           |
|                                                                                                                                                                             | 6 | 21.170885 |

|                                                                                                                                                                                                                                                                                                                                                    |   |           |
|----------------------------------------------------------------------------------------------------------------------------------------------------------------------------------------------------------------------------------------------------------------------------------------------------------------------------------------------------|---|-----------|
| - 3.032210 -> hsa:8517( IKBK, nucleus ) - 4.506367 -> hsa:26994( RNF11, cytoplasm ) - 24.033959 -> hsa:7316( unknown, nucleus )                                                                                                                                                                                                                    |   |           |
| hsa:654( BMP6, extracellular ) - 65.460916 -> hsa:658( BMPR1B, cytoplasm ) - 2.071011 -> hsa:1123( CHN1, cytoplasm )                                                                                                                                                                                                                               |   |           |
| - 33.843739 -> hsa:5879( RAC1, golgi ) - 15.788264 -> hsa:5062( PAK2, cytoplasm ) - 7.217161 -> hsa:5594( MAPK1, cytoplasm ) - 2.520278 -> hsa:8202( NCOA3, nucleus )                                                                                                                                                                              | 7 | 21.150228 |
| hsa:654( BMP6, extracellular ) - 65.460916 -> hsa:658( BMPR1B, cytoplasm ) - 2.071011 -> hsa:1123( CHN1, cytoplasm )                                                                                                                                                                                                                               |   |           |
| - 33.843739 -> hsa:5879( RAC1, golgi ) - 15.788264 -> hsa:5062( PAK2, cytoplasm ) - 7.217161 -> hsa:5594( MAPK1, cytoplasm ) - 2.520278 -> hsa:8648( NCOA1, nucleus )                                                                                                                                                                              | 7 | 21.150228 |
| hsa:3625( INHBB, extracellular ) - 65.460916 -> hsa:90( ACVR1, cytoplasm ) - 2.071011 -> hsa:1123( CHN1, cytoplasm )                                                                                                                                                                                                                               |   |           |
| - 33.843739 -> hsa:5879( RAC1, golgi ) - 15.788264 -> hsa:5062( PAK2, cytoplasm ) - 7.217161 -> hsa:5594( MAPK1, cytoplasm ) - 2.520278 -> hsa:8648( NCOA1, nucleus )                                                                                                                                                                              | 7 | 21.150228 |
| hsa:3626( INHBC, extracellular ) - 65.460916 -> hsa:90( ACVR1, cytoplasm ) - 2.071011 -> hsa:1123( CHN1, cytoplasm )                                                                                                                                                                                                                               |   |           |
| - 33.843739 -> hsa:5879( RAC1, golgi ) - 15.788264 -> hsa:5062( PAK2, cytoplasm ) - 7.217161 -> hsa:5594( MAPK1, cytoplasm ) - 2.520278 -> hsa:8648( NCOA1, nucleus )                                                                                                                                                                              | 7 | 21.150228 |
| hsa:5054( SERPINE1, extracellular ) - 69.278180 -> hsa:5328( PLAU, extracellular ) - 32.655426 -> hsa:3082( HGF, extracellular ) - 3.247723 -> hsa:4233( MET, cytoplasm ) - 2.373007 -> hsa:7409( VAV1, cytoplasm ) - 29.522727 -> hsa:391( RHOG, cytoplasm ) - 2.145471 -> hsa:7046( TGFBR1, cytoplasm ) - 8.820974 -> hsa:7314( UBB, nucleus )   | 8 | 21.149073 |
| hsa:5054( SERPINE1, extracellular ) - 69.278180 -> hsa:5328( PLAU, extracellular ) - 32.655426 -> hsa:3082( HGF, extracellular ) - 3.247723 -> hsa:4233( MET, cytoplasm ) - 2.373007 -> hsa:7409( VAV1, cytoplasm ) - 29.522727 -> hsa:387( RHOA, cytoplasm ) - 2.145471 -> hsa:7046( TGFBR1, cytoplasm ) - 8.820974 -> hsa:7314( UBB, nucleus )   | 8 | 21.149073 |
| hsa:5054( SERPINE1, extracellular ) - 69.278180 -> hsa:5328( PLAU, extracellular ) - 32.655426 -> hsa:3082( HGF, extracellular ) - 3.247723 -> hsa:4233( MET, cytoplasm ) - 2.373007 -> hsa:7409( VAV1, cytoplasm ) - 29.522727 -> hsa:391( RHOG, cytoplasm ) - 2.145471 -> hsa:7046( TGFBR1, cytoplasm ) - 8.820974 -> hsa:7311( UBA52, nucleus ) | 8 | 21.149073 |
| hsa:5054( SERPINE1, extracellular ) - 69.278180 -> hsa:5328( PLAU, extracellular ) - 32.655426 -> hsa:3082( HGF, extracellular ) - 3.247723 -> hsa:4233( MET, cytoplasm ) - 2.373007 -> hsa:7409( VAV1, cytoplasm ) - 29.522727 -> hsa:387( RHOA, cytoplasm ) - 2.145471 -> hsa:7046( TGFBR1, cytoplasm ) - 8.820974 -> hsa:7311( UBA52, nucleus ) | 8 | 21.149073 |
| hsa:5345( SERPINF2, extracellular ) - 69.278180 -> hsa:5328( PLAU, extracellular ) - 32.655426 -> hsa:3082( HGF, extracellular ) - 3.247723 -> hsa:4233( MET, cytoplasm ) - 2.373007 -> hsa:7409( VAV1, cytoplasm ) - 29.522727 -> hsa:391( RHOG, cytoplasm ) - 2.145471 -> hsa:7046( TGFBR1, cytoplasm ) - 8.820974 -> hsa:7314( UBB, nucleus )   | 8 | 21.149073 |
| hsa:5345( SERPINF2, extracellular ) - 69.278180 -> hsa:5328( PLAU, extracellular ) - 32.655426 -> hsa:3082( HGF, extracellular ) - 3.247723 -> hsa:4233( MET, cytoplasm ) - 2.373007 -> hsa:7409( VAV1, cytoplasm ) - 29.522727 -> hsa:387( RHOA, cytoplasm ) - 2.145471 -> hsa:7046( TGFBR1, cytoplasm ) - 8.820974 -> hsa:7314( UBB, nucleus )   | 8 | 21.149073 |
| hsa:5345( SERPINF2, extracellular ) - 69.278180 -> hsa:5328( PLAU, extracellular ) - 32.655426 -> hsa:3082( HGF, extracellular ) - 3.247723 -> hsa:4233( MET, cytoplasm ) - 2.373007 -> hsa:7409( VAV1, cytoplasm ) - 29.522727 -> hsa:391( RHOG, cytoplasm ) - 2.145471 -> hsa:7046( TGFBR1, cytoplasm ) - 8.820974 -> hsa:7311( UBA52, nucleus ) | 8 | 21.149073 |
| hsa:5345( SERPINF2, extracellular ) - 69.278180 -> hsa:5328( PLAU, extracellular ) - 32.655426 -> hsa:3082( HGF, extracellular ) - 3.247723 -> hsa:4233( MET, cytoplasm ) - 2.373007 -> hsa:7409( VAV1, cytoplasm ) - 29.522727 -> hsa:387( RHOA, cytoplasm ) - 2.145471 -> hsa:7046( TGFBR1, cytoplasm ) - 8.820974 -> hsa:7311( UBA52, nucleus ) | 8 | 21.149073 |
| hsa:5269( SERPINB6, extracellular ) - 69.278180 -> hsa:5328( PLAU, extracellular ) - 32.655426 -> hsa:3082( HGF, extracellular ) - 3.247723 -> hsa:4233( MET, cytoplasm ) - 2.373007 -> hsa:7409( VAV1, cytoplasm ) - 29.522727 -> hsa:391( RHOG, cytoplasm ) - 2.145471 -> hsa:7046( TGFBR1, cytoplasm ) - 8.820974 -> hsa:7314( UBB, nucleus )   | 8 | 21.149073 |
| hsa:5269( SERPINB6, extracellular ) - 69.278180 -> hsa:5328( PLAU, extracellular ) - 32.655426 -> hsa:3082( HGF, extracellular ) - 3.247723 -> hsa:4233( MET, cytoplasm ) - 2.373007 -> hsa:7409( VAV1, cytoplasm ) - 29.522727 -> hsa:387( RHOA, cytoplasm ) - 2.145471 -> hsa:7046( TGFBR1, cytoplasm ) - 8.820974 -> hsa:7314( UBB, nucleus )   | 8 | 21.149073 |



|                                                                                                                                                                             |   |           |
|-----------------------------------------------------------------------------------------------------------------------------------------------------------------------------|---|-----------|
| -> hsa:998( CDC42 , cytoplasm ) - 8.259484 -> hsa:23048( FBNP1 , cytoplasm ) - 2.692116 -> hsa:8658( TNKS , nucleus )                                                       |   |           |
| hsa:654( BMP6 , extracellular ) - 65.460916 -> hsa:658( BMPR1B , cytoplasm ) - 2.071011 -> hsa:1123( CHN1 , cytoplasm )                                                     |   |           |
| - 33.843739 -> hsa:5879( RAC1 , golgi ) - 2.145471 -> hsa:5578( PRKCA , cytoplasm ) - 2.205244 -> hsa:4772( NFATC1 , nucleus )                                              | 6 | 21.145276 |
| hsa:3625( INHBB , extracellular ) - 65.460916 -> hsa:90( ACVR1 , cytoplasm ) - 2.071011 -> hsa:1123( CHN1 , cytoplasm )                                                     |   |           |
| - 33.843739 -> hsa:5879( RAC1 , golgi ) - 2.145471 -> hsa:5578( PRKCA , cytoplasm ) - 2.205244 -> hsa:4772( NFATC1 , nucleus )                                              | 6 | 21.145276 |
| hsa:3626( INHBC , extracellular ) - 65.460916 -> hsa:90( ACVR1 , cytoplasm ) - 2.071011 -> hsa:1123( CHN1 , cytoplasm )                                                     |   |           |
| - 33.843739 -> hsa:5879( RAC1 , golgi ) - 2.145471 -> hsa:5578( PRKCA , cytoplasm ) - 2.205244 -> hsa:4772( NFATC1 , nucleus )                                              | 6 | 21.145276 |
| hsa:654( BMP6 , extracellular ) - 65.460916 -> hsa:658( BMPR1B , cytoplasm ) - 2.071011 -> hsa:1123( CHN1 , cytoplasm )                                                     |   |           |
| - 33.843739 -> hsa:5879( RAC1 , golgi ) - 2.145471 -> hsa:5610( EIF2AK2 , nucleus ) - 2.071011 -> hsa:6772( STAT1 , nucleus )                                               | 6 | 21.11843  |
| hsa:3625( INHBB , extracellular ) - 65.460916 -> hsa:90( ACVR1 , cytoplasm ) - 2.071011 -> hsa:1123( CHN1 , cytoplasm )                                                     |   |           |
| - 33.843739 -> hsa:5879( RAC1 , golgi ) - 2.145471 -> hsa:5610( EIF2AK2 , nucleus ) - 2.071011 -> hsa:6772( STAT1 , nucleus )                                               | 6 | 21.11843  |
| hsa:3626( INHBC , extracellular ) - 65.460916 -> hsa:90( ACVR1 , cytoplasm ) - 2.071011 -> hsa:1123( CHN1 , cytoplasm )                                                     |   |           |
| - 33.843739 -> hsa:5879( RAC1 , golgi ) - 2.145471 -> hsa:5610( EIF2AK2 , nucleus ) - 2.071011 -> hsa:6772( STAT1 , nucleus )                                               | 6 | 21.11843  |
| hsa:654( BMP6 , extracellular ) - 65.460916 -> hsa:658( BMPR1B , cytoplasm ) - 2.071011 -> hsa:1123( CHN1 , cytoplasm )                                                     |   |           |
| - 33.843739 -> hsa:5879( RAC1 , golgi ) - 15.788264 -> hsa:5058( PAK1 , cytoplasm ) - 7.217161 -> hsa:7048( TGFBR2 , cytoplasm ) - 2.205244 -> hsa:9133( CCNB2 , nucleus )  | 7 | 21.097723 |
| hsa:654( BMP6 , extracellular ) - 65.460916 -> hsa:658( BMPR1B , cytoplasm ) - 2.071011 -> hsa:1123( CHN1 , cytoplasm )                                                     |   |           |
| - 33.843739 -> hsa:5879( RAC1 , golgi ) - 15.788264 -> hsa:5058( PAK1 , cytoplasm ) - 7.217161 -> hsa:7048( TGFBR2 , cytoplasm ) - 2.205244 -> hsa:891( CCNB1 , nucleus )   | 7 | 21.097723 |
| hsa:654( BMP6 , extracellular ) - 65.460916 -> hsa:658( BMPR1B , cytoplasm ) - 2.071011 -> hsa:1123( CHN1 , cytoplasm )                                                     |   |           |
| - 33.843739 -> hsa:5879( RAC1 , golgi ) - 15.788264 -> hsa:5058( PAK1 , cytoplasm ) - 7.217161 -> hsa:1020( CDK5 , cytoplasm ) - 2.205244 -> hsa:91768( CABLES1 , nucleus ) | 7 | 21.097723 |
| hsa:654( BMP6 , extracellular ) - 65.460916 -> hsa:658( BMPR1B , cytoplasm ) - 2.071011 -> hsa:1123( CHN1 , cytoplasm )                                                     |   |           |
| - 33.843739 -> hsa:5879( RAC1 , golgi ) - 15.788264 -> hsa:5058( PAK1 , cytoplasm ) - 7.217161 -> hsa:984( CDC2L1 , cytoplasm ) - 2.205244 -> hsa:81669( CCNL2 , nucleus )  | 7 | 21.097723 |
| hsa:3625( INHBB , extracellular ) - 65.460916 -> hsa:90( ACVR1 , cytoplasm ) - 2.071011 -> hsa:1123( CHN1 , cytoplasm )                                                     |   |           |
| - 33.843739 -> hsa:5879( RAC1 , golgi ) - 15.788264 -> hsa:5058( PAK1 , cytoplasm ) - 7.217161 -> hsa:7048( TGFBR2 , cytoplasm ) - 2.205244 -> hsa:891( CCNB1 , nucleus )   | 7 | 21.097723 |
| hsa:3625( INHBB , extracellular ) - 65.460916 -> hsa:90( ACVR1 , cytoplasm ) - 2.071011 -> hsa:1123( CHN1 , cytoplasm )                                                     |   |           |
| - 33.843739 -> hsa:5879( RAC1 , golgi ) - 15.788264 -> hsa:5058( PAK1 , cytoplasm ) - 7.217161 -> hsa:1020( CDK5 , cytoplasm ) - 2.205244 -> hsa:91768( CABLES1 , nucleus ) | 7 | 21.097723 |
| hsa:3625( INHBB , extracellular ) - 65.460916 -> hsa:90( ACVR1 , cytoplasm ) - 2.071011 -> hsa:1123( CHN1 , cytoplasm )                                                     |   |           |
| - 33.843739 -> hsa:5879( RAC1 , golgi ) - 15.788264 -> hsa:5058( PAK1 , cytoplasm ) - 7.217161 -> hsa:1020( CDK5 , cytoplasm ) - 2.205244 -> hsa:81928( CABLES2 , nucleus ) | 7 | 21.097723 |
| hsa:3625( INHBB , extracellular ) - 65.460916 -> hsa:90( ACVR1 , cytoplasm ) - 2.071011 -> hsa:1123( CHN1 , cytoplasm )                                                     |   |           |
| - 33.843739 -> hsa:5879( RAC1 , golgi ) - 15.788264 -> hsa:5058( PAK1 , cytoplasm ) - 7.217161 -> hsa:1020( CDK5 , cytoplasm ) - 2.205244 -> hsa:900( CCNG1 , nucleus )     | 7 | 21.097723 |
| hsa:3625( INHBB , extracellular ) - 65.460916 -> hsa:90( ACVR1 , cytoplasm ) - 2.071011 -> hsa:1123( CHN1 , cytoplasm )                                                     |   |           |
| - 33.843739 -> hsa:5879( RAC1 , golgi ) - 15.788264 -> hsa:5058( PAK1 , cytoplasm ) - 7.217161 -> hsa:1020( CDK5 , cytoplasm ) - 2.205244 -> hsa:900( CCNG1 , nucleus )     | 7 | 21.097723 |

|                                                                                                                                                                                                                                                                                                                 |   |           |
|-----------------------------------------------------------------------------------------------------------------------------------------------------------------------------------------------------------------------------------------------------------------------------------------------------------------|---|-----------|
| - 33.843739 -> hsa:5879( RAC1 , golgi ) - 15.788264 -> hsa:5058( PAK1 , cytoplasm ) - 7.217161 -> hsa:984( CDC2L1 , cytoplasm ) - 2.205244 -> hsa:81669( CCNL2 , nucleus )                                                                                                                                      |   |           |
| hsa:3626( INHBC , extracellular ) - 65.460916 -> hsa:90( ACVR1 , cytoplasm ) - 2.071011 -> hsa:1123( CHN1 , cytoplasm )                                                                                                                                                                                         |   |           |
| - 33.843739 -> hsa:5879( RAC1 , golgi ) - 15.788264 -> hsa:5058( PAK1 , cytoplasm ) - 7.217161 -> hsa:7048( TGFBR2 , cytoplasm ) - 2.205244 -> hsa:891( CCNB1 , nucleus )                                                                                                                                       | 7 | 21.097723 |
| hsa:3626( INHBC , extracellular ) - 65.460916 -> hsa:90( ACVR1 , cytoplasm ) - 2.071011 -> hsa:1123( CHN1 , cytoplasm )                                                                                                                                                                                         |   |           |
| - 33.843739 -> hsa:5879( RAC1 , golgi ) - 15.788264 -> hsa:5058( PAK1 , cytoplasm ) - 7.217161 -> hsa:1020( CDK5 , cytoplasm ) - 2.205244 -> hsa:91768( CABLES1 , nucleus )                                                                                                                                     | 7 | 21.097723 |
| hsa:3626( INHBC , extracellular ) - 65.460916 -> hsa:90( ACVR1 , cytoplasm ) - 2.071011 -> hsa:1123( CHN1 , cytoplasm )                                                                                                                                                                                         |   |           |
| - 33.843739 -> hsa:5879( RAC1 , golgi ) - 15.788264 -> hsa:5058( PAK1 , cytoplasm ) - 7.217161 -> hsa:1020( CDK5 , cytoplasm ) - 2.205244 -> hsa:81928( CABLES2 , nucleus )                                                                                                                                     | 7 | 21.097723 |
| hsa:3626( INHBC , extracellular ) - 65.460916 -> hsa:90( ACVR1 , cytoplasm ) - 2.071011 -> hsa:1123( CHN1 , cytoplasm )                                                                                                                                                                                         |   |           |
| - 33.843739 -> hsa:5879( RAC1 , golgi ) - 15.788264 -> hsa:5058( PAK1 , cytoplasm ) - 7.217161 -> hsa:1020( CDK5 , cytoplasm ) - 2.205244 -> hsa:900( CCNG1 , nucleus )                                                                                                                                         | 7 | 21.097723 |
| hsa:3626( INHBC , extracellular ) - 65.460916 -> hsa:90( ACVR1 , cytoplasm ) - 2.071011 -> hsa:1123( CHN1 , cytoplasm )                                                                                                                                                                                         |   |           |
| - 33.843739 -> hsa:5879( RAC1 , golgi ) - 15.788264 -> hsa:5058( PAK1 , cytoplasm ) - 7.217161 -> hsa:984( CDC2L1 , cytoplasm ) - 2.205244 -> hsa:81669( CCNL2 , nucleus )                                                                                                                                      | 7 | 21.097723 |
| hsa:654( BMP6 , extracellular ) - 65.460916 -> hsa:658( BMPR1B , cytoplasm ) - 2.071011 -> hsa:1123( CHN1 , cytoplasm )                                                                                                                                                                                         |   |           |
| - 33.843739 -> hsa:5879( RAC1 , golgi ) - 15.788264 -> hsa:5058( PAK1 , cytoplasm ) - 3.913667 -> hsa:207( AKT1 , cytoplasm ) - 5.390596 -> hsa:1385( CREB1 , nucleus )                                                                                                                                         | 7 | 21.078032 |
| hsa:654( BMP6 , extracellular ) - 65.460916 -> hsa:658( BMPR1B , cytoplasm ) - 2.071011 -> hsa:1123( CHN1 , cytoplasm )                                                                                                                                                                                         |   |           |
| - 33.843739 -> hsa:5879( RAC1 , golgi ) - 15.788264 -> hsa:5058( PAK1 , cytoplasm ) - 3.913667 -> hsa:207( AKT1 , cytoplasm ) - 5.337007 -> hsa:79026( AHNAK , nucleus )                                                                                                                                        | 7 | 21.069101 |
| hsa:654( BMP6 , extracellular ) - 65.460916 -> hsa:658( BMPR1B , cytoplasm ) - 2.524005 -> hsa:9459( ARHGEF6 , cytoplasm ) - 29.522727 -> hsa:998( CDC42 , cytoplasm ) - 2.145471 -> hsa:5599( MAPK8 , cytoplasm ) - 5.390596 -> hsa:122953( JDP2 , nucleus )                                                   | 6 | 21.008743 |
| hsa:654( BMP6 , extracellular ) - 65.460916 -> hsa:658( BMPR1B , cytoplasm ) - 2.524005 -> hsa:9459( ARHGEF6 , cytoplasm ) - 29.522727 -> hsa:998( CDC42 , cytoplasm ) - 2.145471 -> hsa:5601( MAPK9 , cytoplasm ) - 5.390596 -> hsa:122953( JDP2 , nucleus )                                                   | 6 | 21.008743 |
| hsa:654( BMP6 , extracellular ) - 65.460916 -> hsa:658( BMPR1B , cytoplasm ) - 2.524005 -> hsa:9459( ARHGEF6 , cytoplasm ) - 29.522727 -> hsa:998( CDC42 , cytoplasm ) - 2.145471 -> hsa:5599( MAPK8 , cytoplasm ) - 5.390596 -> hsa:3726( JUNB , nucleus )                                                     | 6 | 21.008743 |
| hsa:654( BMP6 , extracellular ) - 65.460916 -> hsa:658( BMPR1B , cytoplasm ) - 2.524005 -> hsa:9459( ARHGEF6 , cytoplasm ) - 29.522727 -> hsa:998( CDC42 , cytoplasm ) - 2.145471 -> hsa:5599( MAPK8 , cytoplasm ) - 5.390596 -> hsa:3727( JUND , nucleus )                                                     | 6 | 21.008743 |
| hsa:654( BMP6 , extracellular ) - 65.460916 -> hsa:658( BMPR1B , cytoplasm ) - 2.524005 -> hsa:9459( ARHGEF6 , cytoplasm ) - 29.522727 -> hsa:998( CDC42 , cytoplasm ) - 2.145471 -> hsa:5601( MAPK9 , cytoplasm ) - 5.390596 -> hsa:3727( JUND , nucleus )                                                     | 6 | 21.008743 |
| hsa:654( BMP6 , extracellular ) - 65.460916 -> hsa:658( BMPR1B , cytoplasm ) - 2.524005 -> hsa:9459( ARHGEF6 , cytoplasm ) - 29.522727 -> hsa:998( CDC42 , cytoplasm ) - 2.145471 -> hsa:5599( MAPK8 , cytoplasm ) - 5.390596 -> hsa:3725( JUN , nucleus )                                                      | 6 | 21.008743 |
| hsa:5054( SERPINE1 , extracellular ) - 69.278180 -> hsa:5328( PLAUG , extracellular ) - 32.655426 -> hsa:3082( HGF , extracellular ) - 3.247723 -> hsa:4233( MET , cytoplasm ) - 2.071011 -> hsa:6464( SHC1 , cytoplasm ) - 2.563870 -> hsa:5578( PRKCA , cytoplasm ) - 16.171787 -> hsa:7157( TP53 , nucleus ) | 7 | 20.997999 |

|                                                                                                                                                                                                                                                                                                                                                                                                           |   |           |
|-----------------------------------------------------------------------------------------------------------------------------------------------------------------------------------------------------------------------------------------------------------------------------------------------------------------------------------------------------------------------------------------------------------|---|-----------|
| hsa:5345( SERPINF2 , extracellular ) - 69.278180 -> hsa:5328( PLAU , extracellular ) - 32.655426 -> hsa:3082( HGF , extracellular ) - 3.247723 -> hsa:4233( MET , cytoplasm ) - 2.071011 -> hsa:6464( SHC1 , cytoplasm ) - 2.563870 -> hsa:5578( PRKCA , cytoplasm ) - 16.171787 -> hsa:7157( TP53 , nucleus )                                                                                            | 7 | 20.997999 |
| hsa:5269( SERPINB6 , extracellular ) - 69.278180 -> hsa:5328( PLAU , extracellular ) - 32.655426 -> hsa:3082( HGF , extracellular ) - 3.247723 -> hsa:4233( MET , cytoplasm ) - 2.071011 -> hsa:6464( SHC1 , cytoplasm ) - 2.563870 -> hsa:5578( PRKCA , cytoplasm ) - 16.171787 -> hsa:7157( TP53 , nucleus )                                                                                            | 7 | 20.997999 |
| hsa:5104( SERPINA5 , extracellular ) - 69.278180 -> hsa:5328( PLAU , extracellular ) - 32.655426 -> hsa:3082( HGF , extracellular ) - 3.247723 -> hsa:4233( MET , cytoplasm ) - 2.071011 -> hsa:6464( SHC1 , cytoplasm ) - 2.563870 -> hsa:5578( PRKCA , cytoplasm ) - 16.171787 -> hsa:7157( TP53 , nucleus )                                                                                            | 7 | 20.997999 |
| hsa:5055( SERPINB2 , extracellular ) - 69.278180 -> hsa:5328( PLAU , extracellular ) - 32.655426 -> hsa:3082( HGF , extracellular ) - 3.247723 -> hsa:4233( MET , cytoplasm ) - 2.071011 -> hsa:6464( SHC1 , cytoplasm ) - 2.563870 -> hsa:5578( PRKCA , cytoplasm ) - 16.171787 -> hsa:7157( TP53 , nucleus )                                                                                            | 7 | 20.997999 |
| hsa:654( BMP6 , extracellular ) - 65.460916 -> hsa:658( BMPR1B , cytoplasm ) - 2.071011 -> hsa:1123( CHN1 , cytoplasm ) - 33.843739 -> hsa:5879( RAC1 , golgi ) - 2.145471 -> hsa:5578( PRKCA , cytoplasm ) - 4.410487 -> hsa:2130( EWSR1 , nucleus ) - 18.025470 -> hsa:6297( SALL2 , nucleus )                                                                                                          | 7 | 20.992849 |
| hsa:654( BMP6 , extracellular ) - 65.460916 -> hsa:658( BMPR1B , cytoplasm ) - 2.524005 -> hsa:9459( ARHGEF6 , cytoplasm ) - 29.522727 -> hsa:998( CDC42 , cytoplasm ) - 15.788264 -> hsa:5058( PAK1 , cytoplasm ) - 7.217161 -> hsa:5594( MAPK1 , cytoplasm ) - 5.390596 -> hsa:7175( TPR , nucleus )                                                                                                    | 7 | 20.983945 |
| hsa:654( BMP6 , extracellular ) - 65.460916 -> hsa:658( BMPR1B , cytoplasm ) - 2.524005 -> hsa:9459( ARHGEF6 , cytoplasm ) - 29.522727 -> hsa:998( CDC42 , cytoplasm ) - 15.788264 -> hsa:5058( PAK1 , cytoplasm ) - 7.217161 -> hsa:5594( MAPK1 , cytoplasm ) - 5.390596 -> hsa:1051( CEBPB , nucleus )                                                                                                  | 7 | 20.983945 |
| hsa:654( BMP6 , extracellular ) - 65.460916 -> hsa:658( BMPR1B , cytoplasm ) - 2.524005 -> hsa:9459( ARHGEF6 , cytoplasm ) - 29.522727 -> hsa:998( CDC42 , cytoplasm ) - 15.788264 -> hsa:5058( PAK1 , cytoplasm ) - 7.217161 -> hsa:5594( MAPK1 , cytoplasm ) - 5.390596 -> hsa:2353( FOS , nucleus )                                                                                                    | 7 | 20.983945 |
| hsa:654( BMP6 , extracellular ) - 65.460916 -> hsa:658( BMPR1B , cytoplasm ) - 2.524005 -> hsa:9459( ARHGEF6 , cytoplasm ) - 29.522727 -> hsa:998( CDC42 , cytoplasm ) - 15.788264 -> hsa:5058( PAK1 , cytoplasm ) - 7.217161 -> hsa:1457( CSNK2A1 , cytoplasm ) - 5.390596 -> hsa:466( ATF1 , nucleus )                                                                                                  | 7 | 20.983945 |
| hsa:3625( INHBB , extracellular ) - 65.460916 -> hsa:90( ACVR1 , cytoplasm ) - 2.071011 -> hsa:1123( CHN1 , cytoplasm ) - 33.843739 -> hsa:5879( RAC1 , golgi ) - 15.788264 -> hsa:5062( PAK2 , cytoplasm ) - 2.206641 -> hsa:6714( SRC , cytoplasm ) - 6.482107 -> hsa:6778( STAT6 , nucleus )                                                                                                           | 7 | 20.975446 |
| hsa:3626( INHBC , extracellular ) - 65.460916 -> hsa:90( ACVR1 , cytoplasm ) - 2.071011 -> hsa:1123( CHN1 , cytoplasm ) - 33.843739 -> hsa:5879( RAC1 , golgi ) - 15.788264 -> hsa:5062( PAK2 , cytoplasm ) - 2.206641 -> hsa:6714( SRC , cytoplasm ) - 6.482107 -> hsa:6778( STAT6 , nucleus )                                                                                                           | 7 | 20.975446 |
| hsa:12( SERPINA3 , extracellular ) - 69.278180 -> hsa:4485( MST1 , extracellular ) - 3.247723 -> hsa:4486( MST1R , cytoplasm ) - 2.071011 -> hsa:3717( JAK2 , cytoplasm ) - 9.046825 -> hsa:6772( STAT1 , nucleus )                                                                                                                                                                                       | 5 | 20.910935 |
| hsa:12( SERPINA3 , extracellular ) - 69.278180 -> hsa:4485( MST1 , extracellular ) - 3.247723 -> hsa:4486( MST1R , cytoplasm ) - 2.071011 -> hsa:3717( JAK2 , cytoplasm ) - 9.046825 -> hsa:6773( STAT2 , nucleus )                                                                                                                                                                                       | 5 | 20.910935 |
| hsa:5054( SERPINE1 , extracellular ) - 69.278180 -> hsa:5328( PLAU , extracellular ) - 32.655426 -> hsa:3082( HGF , extracellular ) - 3.247723 -> hsa:4233( MET , cytoplasm ) - 2.829073 -> hsa:5335( PLCG1 , cytoplasm ) - 20.265953 -> hsa:58480( RHOU , cytoplasm ) - 22.752059 -> hsa:5058( PAK1 , cytoplasm ) - 7.217161 -> hsa:9641( IKBKE , cytoplasm ) - 8.820974 -> hsa:10291( SF3A1 , nucleus ) | 9 | 20.883319 |
| hsa:5345( SERPINF2 , extracellular ) - 69.278180 -> hsa:5328( PLAU , extracellular ) - 32.655426 -> hsa:3082( HGF , extracellular ) - 3.247723 -> hsa:4233( MET , cytoplasm ) - 2.829073 -> hsa:5335( PLCG1 , cytoplasm ) - 20.265953 -> hsa:58480( RHOU , cytoplasm ) - 22.752059 -> hsa:5058( PAK1 , cytoplasm ) - 7.217161 -> hsa:9641( IKBKE , cytoplasm )                                            | 9 | 20.883319 |



|                                                                                                                                                                                                                                                                                                                                                                |   |           |
|----------------------------------------------------------------------------------------------------------------------------------------------------------------------------------------------------------------------------------------------------------------------------------------------------------------------------------------------------------------|---|-----------|
| - 8.820974 -> hsa:10291( SF3A1 , nucleus )                                                                                                                                                                                                                                                                                                                     |   |           |
| hsa:5269( SERPINB6 , extracellular ) - 69.278180 -> hsa:5328( PLAU , extracellular ) - 32.655426 -> hsa:3082( HGF , extracellular ) - 3.247723 -> hsa:4233( MET , cytoplasm ) - 2.829073 -> hsa:5335( PLCG1 , cytoplasm ) - 20.265953 -> hsa:58480( RHOU , cytoplasm ) - 22.752059 -> hsa:5058( PAK1 , cytoplasm ) - 7.217161 -> hsa:9641( IKBKE , cytoplasm ) | 9 | 20.883319 |
| - 8.820974 -> hsa:10291( SF3A1 , nucleus )                                                                                                                                                                                                                                                                                                                     |   |           |
| hsa:5104( SERPINA5 , extracellular ) - 69.278180 -> hsa:5328( PLAU , extracellular ) - 32.655426 -> hsa:3082( HGF , extracellular ) - 3.247723 -> hsa:4233( MET , cytoplasm ) - 2.829073 -> hsa:5335( PLCG1 , cytoplasm ) - 20.265953 -> hsa:58480( RHOU , cytoplasm ) - 22.752059 -> hsa:5058( PAK1 , cytoplasm ) - 7.217161 -> hsa:9641( IKBKE , cytoplasm ) | 9 | 20.883319 |
| - 8.820974 -> hsa:10291( SF3A1 , nucleus )                                                                                                                                                                                                                                                                                                                     |   |           |
| hsa:5055( SERPINB2 , extracellular ) - 69.278180 -> hsa:5328( PLAU , extracellular ) - 32.655426 -> hsa:3082( HGF , extracellular ) - 3.247723 -> hsa:4233( MET , cytoplasm ) - 2.829073 -> hsa:5335( PLCG1 , cytoplasm ) - 20.265953 -> hsa:58480( RHOU , cytoplasm ) - 22.752059 -> hsa:5058( PAK1 , cytoplasm ) - 7.217161 -> hsa:9641( IKBKE , cytoplasm ) | 9 | 20.883319 |
| - 8.820974 -> hsa:10291( SF3A1 , nucleus )                                                                                                                                                                                                                                                                                                                     |   |           |
| hsa:3625( INHBB , extracellular ) - 65.460916 -> hsa:90( ACVR1 , cytoplasm ) - 2.071011 -> hsa:1123( CHN1 , cytoplasm ) - 33.843739 -> hsa:5879( RAC1 , golgi ) - 15.788264 -> hsa:5058( PAK1 , cytoplasm ) - 2.738090 -> hsa:5580( PRKCD , cytoplasm ) - 5.390596 -> hsa:4780( NFE2L2 , nucleus )                                                             | 7 | 20.882103 |
| hsa:3626( INHBC , extracellular ) - 65.460916 -> hsa:90( ACVR1 , cytoplasm ) - 2.071011 -> hsa:1123( CHN1 , cytoplasm ) - 33.843739 -> hsa:5879( RAC1 , golgi ) - 15.788264 -> hsa:5058( PAK1 , cytoplasm ) - 2.738090 -> hsa:5580( PRKCD , cytoplasm ) - 5.390596 -> hsa:4780( NFE2L2 , nucleus )                                                             | 7 | 20.882103 |
| hsa:654( BMP6 , extracellular ) - 65.460916 -> hsa:658( BMPR1B , cytoplasm ) - 2.524005 -> hsa:9459( ARHGEF6 , cytoplasm ) - 29.522727 -> hsa:998( CDC42 , cytoplasm ) - 15.788264 -> hsa:5062( PAK2 , cytoplasm ) - 7.217161 -> hsa:5594( MAPK1 , cytoplasm ) - 4.410487 -> hsa:5468( PPARG , nucleus )                                                       | 7 | 20.820593 |
| hsa:654( BMP6 , extracellular ) - 65.460916 -> hsa:658( BMPR1B , cytoplasm ) - 2.524005 -> hsa:9459( ARHGEF6 , cytoplasm ) - 29.522727 -> hsa:998( CDC42 , cytoplasm ) - 15.788264 -> hsa:5058( PAK1 , cytoplasm ) - 7.217161 -> hsa:5594( MAPK1 , cytoplasm ) - 4.410487 -> hsa:2516( NR5A1 , nucleus )                                                       | 7 | 20.820593 |
| hsa:654( BMP6 , extracellular ) - 65.460916 -> hsa:658( BMPR1B , cytoplasm ) - 2.524005 -> hsa:9459( ARHGEF6 , cytoplasm ) - 29.522727 -> hsa:998( CDC42 , cytoplasm ) - 15.788264 -> hsa:5058( PAK1 , cytoplasm ) - 7.217161 -> hsa:5594( MAPK1 , cytoplasm ) - 4.410487 -> hsa:3164( NR4A1 , nucleus )                                                       | 7 | 20.820593 |
| hsa:654( BMP6 , extracellular ) - 65.460916 -> hsa:658( BMPR1B , cytoplasm ) - 2.524005 -> hsa:9459( ARHGEF6 , cytoplasm ) - 29.522727 -> hsa:998( CDC42 , cytoplasm ) - 15.788264 -> hsa:5058( PAK1 , cytoplasm ) - 7.217161 -> hsa:1457( CSNK2A1 , cytoplasm ) - 4.410487 -> hsa:3183( HNRNPC , nucleus )                                                    | 7 | 20.820593 |
| hsa:654( BMP6 , extracellular ) - 65.460916 -> hsa:658( BMPR1B , cytoplasm ) - 2.524005 -> hsa:9459( ARHGEF6 , cytoplasm ) - 29.522727 -> hsa:998( CDC42 , cytoplasm ) - 15.788264 -> hsa:5058( PAK1 , cytoplasm ) - 7.217161 -> hsa:1457( CSNK2A1 , cytoplasm ) - 4.410487 -> hsa:3181( HNRNPA2B1 , nucleus )                                                 | 7 | 20.820593 |
| hsa:654( BMP6 , extracellular ) - 65.460916 -> hsa:658( BMPR1B , cytoplasm ) - 2.524005 -> hsa:9459( ARHGEF6 , cytoplasm ) - 29.522727 -> hsa:998( CDC42 , cytoplasm ) - 2.145471 -> hsa:5599( MAPK8 , cytoplasm ) - 4.410487 -> hsa:1026( CDKN1A , nucleus )                                                                                                  | 6 | 20.812721 |
| hsa:654( BMP6 , extracellular ) - 65.460916 -> hsa:658( BMPR1B , cytoplasm ) - 2.524005 -> hsa:9459( ARHGEF6 , cytoplasm ) - 29.522727 -> hsa:998( CDC42 , cytoplasm ) - 2.145471 -> hsa:5599( MAPK8 , cytoplasm ) - 4.410487 -> hsa:5468( PPARG , nucleus )                                                                                                   | 6 | 20.812721 |
| hsa:654( BMP6 , extracellular ) - 65.460916 -> hsa:658( BMPR1B , cytoplasm ) - 2.524005 -> hsa:9459( ARHGEF6 , cytoplasm ) - 29.522727 -> hsa:998( CDC42 , cytoplasm ) - 2.145471 -> hsa:5590( PRKCZ , cytoplasm ) - 4.410487 -> hsa:4691( NCL , nucleus )                                                                                                     | 6 | 20.812721 |
| hsa:654( BMP6 , extracellular ) - 65.460916 -> hsa:658( BMPR1B , cytoplasm ) - 2.524005 -> hsa:9459( ARHGEF6 , cytoplasm ) - 29.522727 -> hsa:998( CDC42 , cytoplasm ) - 2.145471 -> hsa:5590( PRKCZ , cytoplasm ) - 4.410487 -> hsa:4691( NCL , nucleus )                                                                                                     | 6 | 20.812721 |

|                                                                                                                                                                                                                                                                                                                                                                                                  |   |           |
|--------------------------------------------------------------------------------------------------------------------------------------------------------------------------------------------------------------------------------------------------------------------------------------------------------------------------------------------------------------------------------------------------|---|-----------|
| cytoplasm ) - 29.522727 -> hsa:998( CDC42 , cytoplasm ) - 2.145471 -> hsa:5599( MAPK8 , cytoplasm ) - 4.410487 -> hsa:2908( NR3C1 , nucleus )                                                                                                                                                                                                                                                    |   |           |
| hsa:654( BMP6 , extracellular ) - 65.460916 -> hsa:658( BMPR1B , cytoplasm ) - 2.524005 -> hsa:9459( ARHGEF6 , cytoplasm ) - 29.522727 -> hsa:998( CDC42 , cytoplasm ) - 2.145471 -> hsa:5599( MAPK8 , cytoplasm ) - 4.211403 -> hsa:1386( ATF2 , nucleus )                                                                                                                                      | 6 | 20.772904 |
| hsa:654( BMP6 , extracellular ) - 65.460916 -> hsa:658( BMPR1B , cytoplasm ) - 2.524005 -> hsa:9459( ARHGEF6 , cytoplasm ) - 29.522727 -> hsa:998( CDC42 , cytoplasm ) - 2.145471 -> hsa:5601( MAPK9 , cytoplasm ) - 4.211403 -> hsa:11016( ATF7 , nucleus )                                                                                                                                     | 6 | 20.772904 |
| hsa:654( BMP6 , extracellular ) - 65.460916 -> hsa:658( BMPR1B , cytoplasm ) - 2.071011 -> hsa:1123( CHN1 , cytoplasm ) - 33.843739 -> hsa:5879( RAC1 , golgi ) - 15.788264 -> hsa:5058( PAK1 , cytoplasm ) - 2.738090 -> hsa:5580( PRKCD , cytoplasm ) - 4.410487 -> hsa:5465( PPARA , nucleus )                                                                                                | 7 | 20.718751 |
| hsa:5054( SERPINE1 , extracellular ) - 69.278180 -> hsa:5328( PLAU , extracellular ) - 32.655426 -> hsa:3082( HGF , extracellular ) - 3.247723 -> hsa:4233( MET , cytoplasm ) - 2.373007 -> hsa:7409( VAV1 , cytoplasm ) - 29.522727 -> hsa:5879( RAC1 , golgi ) - 15.788264 -> hsa:5062( PAK2 , cytoplasm ) - 7.217161 -> hsa:5594( MAPK1 , cytoplasm ) - 5.390596 -> hsa:2353( FOS , nucleus ) | 9 | 20.684135 |
| hsa:5345( SERPINF2 , extracellular ) - 69.278180 -> hsa:5328( PLAU , extracellular ) - 32.655426 -> hsa:3082( HGF , extracellular ) - 3.247723 -> hsa:4233( MET , cytoplasm ) - 2.373007 -> hsa:7409( VAV1 , cytoplasm ) - 29.522727 -> hsa:5879( RAC1 , golgi ) - 15.788264 -> hsa:5062( PAK2 , cytoplasm ) - 7.217161 -> hsa:5594( MAPK1 , cytoplasm ) - 5.390596 -> hsa:2353( FOS , nucleus ) | 9 | 20.684135 |
| hsa:5269( SERPINB6 , extracellular ) - 69.278180 -> hsa:5328( PLAU , extracellular ) - 32.655426 -> hsa:3082( HGF , extracellular ) - 3.247723 -> hsa:4233( MET , cytoplasm ) - 2.373007 -> hsa:7409( VAV1 , cytoplasm ) - 29.522727 -> hsa:5879( RAC1 , golgi ) - 15.788264 -> hsa:5062( PAK2 , cytoplasm ) - 7.217161 -> hsa:5594( MAPK1 , cytoplasm ) - 5.390596 -> hsa:2353( FOS , nucleus ) | 9 | 20.684135 |
| hsa:5104( SERPINA5 , extracellular ) - 69.278180 -> hsa:5328( PLAU , extracellular ) - 32.655426 -> hsa:3082( HGF , extracellular ) - 3.247723 -> hsa:4233( MET , cytoplasm ) - 2.373007 -> hsa:7409( VAV1 , cytoplasm ) - 29.522727 -> hsa:5879( RAC1 , golgi ) - 15.788264 -> hsa:5062( PAK2 , cytoplasm ) - 7.217161 -> hsa:5594( MAPK1 , cytoplasm ) - 5.390596 -> hsa:2353( FOS , nucleus ) | 9 | 20.684135 |
| hsa:5055( SERPINB2 , extracellular ) - 69.278180 -> hsa:5328( PLAU , extracellular ) - 32.655426 -> hsa:3082( HGF , extracellular ) - 3.247723 -> hsa:4233( MET , cytoplasm ) - 2.373007 -> hsa:7409( VAV1 , cytoplasm ) - 29.522727 -> hsa:5879( RAC1 , golgi ) - 15.788264 -> hsa:5062( PAK2 , cytoplasm ) - 7.217161 -> hsa:5594( MAPK1 , cytoplasm ) - 5.390596 -> hsa:2353( FOS , nucleus ) | 9 | 20.684135 |
| hsa:5054( SERPINE1 , extracellular ) - 69.278180 -> hsa:5328( PLAU , extracellular ) - 32.655426 -> hsa:3082( HGF , extracellular ) - 3.247723 -> hsa:4233( MET , cytoplasm ) - 2.373007 -> hsa:7409( VAV1 , cytoplasm ) - 29.522727 -> hsa:998( CDC42 , cytoplasm ) - 2.145471 -> hsa:5599( MAPK8 , cytoplasm ) - 5.390596 -> hsa:122953( JDP2 , nucleus )                                      | 8 | 20.659019 |
| hsa:5054( SERPINE1 , extracellular ) - 69.278180 -> hsa:5328( PLAU , extracellular ) - 32.655426 -> hsa:3082( HGF , extracellular ) - 3.247723 -> hsa:4233( MET , cytoplasm ) - 2.373007 -> hsa:7409( VAV1 , cytoplasm ) - 29.522727 -> hsa:3265( HRAS , cytoplasm ) - 2.145471 -> hsa:5599( MAPK8 , cytoplasm ) - 5.390596 -> hsa:122953( JDP2 , nucleus )                                      | 8 | 20.659019 |
| hsa:5054( SERPINE1 , extracellular ) - 69.278180 -> hsa:5328( PLAU , extracellular ) - 32.655426 -> hsa:3082( HGF , extracellular ) - 3.247723 -> hsa:4233( MET , cytoplasm ) - 2.373007 -> hsa:7409( VAV1 , cytoplasm ) - 29.522727 -> hsa:998( CDC42 , cytoplasm ) - 2.145471 -> hsa:5599( MAPK8 , cytoplasm ) - 5.390596 -> hsa:3726( JUNB , nucleus )                                        | 8 | 20.659019 |
| hsa:5054( SERPINE1 , extracellular ) - 69.278180 -> hsa:5328( PLAU , extracellular ) - 32.655426 -> hsa:3082( HGF , extracellular ) - 3.247723 -> hsa:4233( MET , cytoplasm ) - 2.373007 -> hsa:7409( VAV1 , cytoplasm ) - 29.522727 -> hsa:3265( HRAS , cytoplasm ) - 2.145471 -> hsa:5599( MAPK8 , cytoplasm ) - 5.390596 -> hsa:3726( JUNB , nucleus )                                        | 8 | 20.659019 |
| hsa:5054( SERPINE1 , extracellular ) - 69.278180 -> hsa:5328( PLAU , extracellular ) - 32.655426 -> hsa:3082( HGF , extracellular ) - 3.247723 -> hsa:4233( MET , cytoplasm ) - 2.373007 -> hsa:7409( VAV1 , cytoplasm ) - 29.522727 -> hsa:3265( HRAS , cytoplasm ) - 2.145471 -> hsa:5599( MAPK8 , cytoplasm ) - 5.390596 -> hsa:3726( JUNB , nucleus )                                        | 8 | 20.659019 |







|                                                                                                                                                                                                                                                                                                            |   |           |
|------------------------------------------------------------------------------------------------------------------------------------------------------------------------------------------------------------------------------------------------------------------------------------------------------------|---|-----------|
| -> hsa:3265( HRAS , cytoplasm ) - 2.145471 -> hsa:5599( MAPK8 , cytoplasm ) - 5.390596 -> hsa:3727( JUND , nucleus )                                                                                                                                                                                       |   |           |
| hsa:5055( SERPINB2 , extracellular ) - 69.278180 -> hsa:5328( PLAU , extracellular ) - 32.655426 -> hsa:3082( HGF , extracellular ) - 3.247723 -> hsa:4233( MET , cytoplasm ) - 2.373007 -> hsa:7409( VAV1 , cytoplasm ) - 29.522727                                                                       | 8 | 20.659019 |
| -> hsa:387( RHOA , cytoplasm ) - 2.145471 -> hsa:5566( PRKACA730418 , cytoplasm ) - 5.390596 -> hsa:2353( FOS , nucleus )                                                                                                                                                                                  |   |           |
| hsa:5055( SERPINB2 , extracellular ) - 69.278180 -> hsa:5328( PLAU , extracellular ) - 32.655426 -> hsa:3082( HGF , extracellular ) - 3.247723 -> hsa:4233( MET , cytoplasm ) - 2.373007 -> hsa:7409( VAV1 , cytoplasm ) - 29.522727                                                                       | 8 | 20.659019 |
| -> hsa:387( RHOA , cytoplasm ) - 2.145471 -> hsa:5566( PRKACA730418 , cytoplasm ) - 5.390596 -> hsa:466( ATF1 , nucleus )                                                                                                                                                                                  |   |           |
| hsa:5055( SERPINB2 , extracellular ) - 69.278180 -> hsa:5328( PLAU , extracellular ) - 32.655426 -> hsa:3082( HGF , extracellular ) - 3.247723 -> hsa:4233( MET , cytoplasm ) - 2.373007 -> hsa:7409( VAV1 , cytoplasm ) - 29.522727                                                                       | 8 | 20.659019 |
| -> hsa:998( CDC42 , cytoplasm ) - 2.145471 -> hsa:5599( MAPK8 , cytoplasm ) - 5.390596 -> hsa:3725( JUN , nucleus )                                                                                                                                                                                        |   |           |
| hsa:5055( SERPINB2 , extracellular ) - 69.278180 -> hsa:5328( PLAU , extracellular ) - 32.655426 -> hsa:3082( HGF , extracellular ) - 3.247723 -> hsa:4233( MET , cytoplasm ) - 2.373007 -> hsa:7409( VAV1 , cytoplasm ) - 29.522727                                                                       | 8 | 20.659019 |
| -> hsa:3265( HRAS , cytoplasm ) - 2.145471 -> hsa:5599( MAPK8 , cytoplasm ) - 5.390596 -> hsa:3725( JUN , nucleus )                                                                                                                                                                                        |   |           |
| hsa:654( BMP6 , extracellular ) - 65.460916 -> hsa:658( BMPR1B , cytoplasm ) - 2.071011 -> hsa:1123( CHN1 , cytoplasm ) - 33.843739 -> hsa:5879( RAC1 , golgi ) - 15.788264 -> hsa:5062( PAK2 , cytoplasm ) - 2.206641 -> hsa:6714( SRC , cytoplasm ) - 4.410487 -> hsa:5241( PGR , nucleus )              | 7 | 20.630176 |
| hsa:3625( INHBB , extracellular ) - 65.460916 -> hsa:90( ACVR1 , cytoplasm ) - 2.071011 -> hsa:1123( CHN1 , cytoplasm ) - 33.843739 -> hsa:5879( RAC1 , golgi ) - 15.788264 -> hsa:5062( PAK2 , cytoplasm ) - 2.206641 -> hsa:6714( SRC , cytoplasm ) - 4.410487 -> hsa:2100( ESR2 , nucleus )             | 7 | 20.630176 |
| hsa:3626( INHBC , extracellular ) - 65.460916 -> hsa:90( ACVR1 , cytoplasm ) - 2.071011 -> hsa:1123( CHN1 , cytoplasm ) - 33.843739 -> hsa:5879( RAC1 , golgi ) - 15.788264 -> hsa:5062( PAK2 , cytoplasm ) - 2.206641 -> hsa:6714( SRC , cytoplasm ) - 4.410487 -> hsa:2100( ESR2 , nucleus )             | 7 | 20.630176 |
| hsa:654( BMP6 , extracellular ) - 65.460916 -> hsa:658( BMPR1B , cytoplasm ) - 2.524005 -> hsa:9459( ARHGEF6 , cytoplasm ) - 29.522727 -> hsa:998( CDC42 , cytoplasm ) - 15.788264 -> hsa:5058( PAK1 , cytoplasm ) - 7.217161 -> hsa:5594( MAPK1 , cytoplasm ) - 3.032210 -> hsa:8462( KLF11 , nucleus )   | 7 | 20.590881 |
| hsa:654( BMP6 , extracellular ) - 65.460916 -> hsa:658( BMPR1B , cytoplasm ) - 2.524005 -> hsa:9459( ARHGEF6 , cytoplasm ) - 29.522727 -> hsa:998( CDC42 , cytoplasm ) - 15.788264 -> hsa:5058( PAK1 , cytoplasm ) - 7.217161 -> hsa:1457( CSNK2A1 , cytoplasm ) - 3.032210 -> hsa:10661( KLF1 , nucleus ) | 7 | 20.590881 |
| hsa:5054( SERPINE1 , extracellular ) - 69.278180 -> hsa:5328( PLAU , extracellular ) - 32.655426 -> hsa:3082( HGF , extracellular ) - 3.247723 -> hsa:4233( MET , cytoplasm ) - 2.373007 -> hsa:7409( VAV1 , cytoplasm ) - 29.522727                                                                       | 9 | 20.561622 |
| -> hsa:5879( RAC1 , golgi ) - 15.788264 -> hsa:5058( PAK1 , cytoplasm ) - 7.217161 -> hsa:90( ACVR1 , cytoplasm ) - 4.410487 -> hsa:7068( THRB , nucleus )                                                                                                                                                 |   |           |
| hsa:5054( SERPINE1 , extracellular ) - 69.278180 -> hsa:5328( PLAU , extracellular ) - 32.655426 -> hsa:3082( HGF , extracellular ) - 3.247723 -> hsa:4233( MET , cytoplasm ) - 2.373007 -> hsa:7409( VAV1 , cytoplasm ) - 29.522727                                                                       | 9 | 20.561622 |
| -> hsa:5879( RAC1 , golgi ) - 15.788264 -> hsa:5058( PAK1 , cytoplasm ) - 7.217161 -> hsa:90( ACVR1 , cytoplasm ) - 4.410487 -> hsa:7421( VDR , nucleus )                                                                                                                                                  |   |           |
| hsa:5054( SERPINE1 , extracellular ) - 69.278180 -> hsa:5328( PLAU , extracellular ) - 32.655426 -> hsa:3082( HGF , extracellular ) - 3.247723 -> hsa:4233( MET , cytoplasm ) - 2.373007 -> hsa:7409( VAV1 , cytoplasm ) - 29.522727                                                                       | 9 | 20.561622 |
| -> hsa:5879( RAC1 , golgi ) - 15.788264 -> hsa:5058( PAK1 , cytoplasm ) - 7.217161 -> hsa:9641( IKBKE , cytoplasm ) - 4.410487 -> hsa:10492( SYNCRIP , nucleus )                                                                                                                                           |   |           |
| hsa:5054( SERPINE1 , extracellular ) - 69.278180 -> hsa:5328( PLAU , extracellular ) - 32.655426 -> hsa:3082( HGF , extracellular ) - 3.247723 -> hsa:4233( MET , cytoplasm ) - 2.373007 -> hsa:7409( VAV1 , cytoplasm ) - 29.522727                                                                       | 9 | 20.561622 |



















|                                                                                                                                                                                                                                                                                                                                                                          |   |           |
|--------------------------------------------------------------------------------------------------------------------------------------------------------------------------------------------------------------------------------------------------------------------------------------------------------------------------------------------------------------------------|---|-----------|
| -> hsa:998( CDC42 , cytoplasm ) - 2.145471 -> hsa:6198( RPS6KB1 , cytoplasm ) - 4.410487 -> hsa:84271( POLDIP3 , nucleus )                                                                                                                                                                                                                                               |   |           |
| hsa:5055( SERPINB2 , extracellular ) - 69.278180 -> hsa:5328( PLAU , extracellular ) - 32.655426 -> hsa:3082( HGF , extracellular ) - 3.247723 -> hsa:4233( MET , cytoplasm ) - 2.373007 -> hsa:7409( VAV1 , cytoplasm ) - 29.522727 -> hsa:998( CDC42 , cytoplasm ) - 2.145471 -> hsa:5599( MAPK8 , cytoplasm ) - 4.410487 -> hsa:1026( CDKN1A , nucleus )              | 8 | 20.519003 |
| hsa:5055( SERPINB2 , extracellular ) - 69.278180 -> hsa:5328( PLAU , extracellular ) - 32.655426 -> hsa:3082( HGF , extracellular ) - 3.247723 -> hsa:4233( MET , cytoplasm ) - 2.373007 -> hsa:7409( VAV1 , cytoplasm ) - 29.522727 -> hsa:3265( HRAS , cytoplasm ) - 2.145471 -> hsa:5599( MAPK8 , cytoplasm ) - 4.410487 -> hsa:1026( CDKN1A , nucleus )              | 8 | 20.519003 |
| hsa:5055( SERPINB2 , extracellular ) - 69.278180 -> hsa:5328( PLAU , extracellular ) - 32.655426 -> hsa:3082( HGF , extracellular ) - 3.247723 -> hsa:4233( MET , cytoplasm ) - 2.373007 -> hsa:7409( VAV1 , cytoplasm ) - 29.522727 -> hsa:998( CDC42 , cytoplasm ) - 2.145471 -> hsa:5599( MAPK8 , cytoplasm ) - 4.410487 -> hsa:5468( PPARG , nucleus )               | 8 | 20.519003 |
| hsa:5055( SERPINB2 , extracellular ) - 69.278180 -> hsa:5328( PLAU , extracellular ) - 32.655426 -> hsa:3082( HGF , extracellular ) - 3.247723 -> hsa:4233( MET , cytoplasm ) - 2.373007 -> hsa:7409( VAV1 , cytoplasm ) - 29.522727 -> hsa:3265( HRAS , cytoplasm ) - 2.145471 -> hsa:5599( MAPK8 , cytoplasm ) - 4.410487 -> hsa:5468( PPARG , nucleus )               | 8 | 20.519003 |
| hsa:5055( SERPINB2 , extracellular ) - 69.278180 -> hsa:5328( PLAU , extracellular ) - 32.655426 -> hsa:3082( HGF , extracellular ) - 3.247723 -> hsa:4233( MET , cytoplasm ) - 2.373007 -> hsa:7409( VAV1 , cytoplasm ) - 29.522727 -> hsa:387( RHOA , cytoplasm ) - 2.145471 -> hsa:5566( PRKACA730418 , cytoplasm ) - 4.410487 -> hsa:5725( PTBP1 , nucleus )         | 8 | 20.519003 |
| hsa:5055( SERPINB2 , extracellular ) - 69.278180 -> hsa:5328( PLAU , extracellular ) - 32.655426 -> hsa:3082( HGF , extracellular ) - 3.247723 -> hsa:4233( MET , cytoplasm ) - 2.373007 -> hsa:7409( VAV1 , cytoplasm ) - 29.522727 -> hsa:387( RHOA , cytoplasm ) - 2.145471 -> hsa:5566( PRKACA730418 , cytoplasm ) - 4.410487 -> hsa:3184( HNRPD , nucleus )         | 8 | 20.519003 |
| hsa:5055( SERPINB2 , extracellular ) - 69.278180 -> hsa:5328( PLAU , extracellular ) - 32.655426 -> hsa:3082( HGF , extracellular ) - 3.247723 -> hsa:4233( MET , cytoplasm ) - 2.373007 -> hsa:7409( VAV1 , cytoplasm ) - 29.522727 -> hsa:387( RHOA , cytoplasm ) - 2.145471 -> hsa:5590( PRKCZ , cytoplasm ) - 4.410487 -> hsa:4691( NCL , nucleus )                  | 8 | 20.519003 |
| hsa:5055( SERPINB2 , extracellular ) - 69.278180 -> hsa:5328( PLAU , extracellular ) - 32.655426 -> hsa:3082( HGF , extracellular ) - 3.247723 -> hsa:4233( MET , cytoplasm ) - 2.373007 -> hsa:7409( VAV1 , cytoplasm ) - 29.522727 -> hsa:3265( HRAS , cytoplasm ) - 2.145471 -> hsa:5590( PRKCZ , cytoplasm ) - 4.410487 -> hsa:4691( NCL , nucleus )                 | 8 | 20.519003 |
| hsa:5055( SERPINB2 , extracellular ) - 69.278180 -> hsa:5328( PLAU , extracellular ) - 32.655426 -> hsa:3082( HGF , extracellular ) - 3.247723 -> hsa:4233( MET , cytoplasm ) - 2.373007 -> hsa:7409( VAV1 , cytoplasm ) - 29.522727 -> hsa:3265( HRAS , cytoplasm ) - 2.145471 -> hsa:3643( INSR , endoplasmic reticulum ) - 4.410487 -> hsa:10492( SYNCRIP , nucleus ) | 8 | 20.519003 |
| hsa:5055( SERPINB2 , extracellular ) - 69.278180 -> hsa:5328( PLAU , extracellular ) - 32.655426 -> hsa:3082( HGF , extracellular ) - 3.247723 -> hsa:4233( MET , cytoplasm ) - 2.373007 -> hsa:7409( VAV1 , cytoplasm ) - 29.522727 -> hsa:5879( RAC1 , golgi ) - 2.145471 -> hsa:6198( RPS6KB1 , cytoplasm ) - 4.410487 -> hsa:84271( POLDIP3 , nucleus )              | 8 | 20.519003 |
| hsa:5055( SERPINB2 , extracellular ) - 69.278180 -> hsa:5328( PLAU , extracellular ) - 32.655426 -> hsa:3082( HGF , extracellular ) - 3.247723 -> hsa:4233( MET , cytoplasm ) - 2.373007 -> hsa:7409( VAV1 , cytoplasm ) - 29.522727 -> hsa:998( CDC42 , cytoplasm ) - 2.145471 -> hsa:6198( RPS6KB1 , cytoplasm ) - 4.410487 -> hsa:84271( POLDIP3 , nucleus )          | 8 | 20.519003 |
| hsa:654( BMP6 , extracellular ) - 65.460916 -> hsa:658( BMPR1B , cytoplasm ) - 2.524005 -> hsa:9459( ARHGEF6 , cytoplasm ) - 29.522727 -> hsa:998( CDC42 , cytoplasm ) - 15.788264 -> hsa:5058( PAK1 , cytoplasm ) - 7.217161 -> hsa:5594( MAPK1 , cytoplasm ) - 2.520278 -> hsa:8202( NCOA3 , nucleus )                                                                 | 7 | 20.505559 |
| hsa:654( BMP6 , extracellular ) - 65.460916 -> hsa:658( BMPR1B , cytoplasm ) - 2.524005 -> hsa:9459( ARHGEF6 , cytoplasm ) - 29.522727 -> hsa:998( CDC42 , cytoplasm ) - 15.788264 -> hsa:5058( PAK1 , cytoplasm ) - 7.217161 ->                                                                                                                                         | 7 | 20.505559 |







|                                                                                                                                                                                                                                                                                                                                                                                                                   |   |           |
|-------------------------------------------------------------------------------------------------------------------------------------------------------------------------------------------------------------------------------------------------------------------------------------------------------------------------------------------------------------------------------------------------------------------|---|-----------|
| -> hsa:5879( RAC1 , golgi ) - 15.788264 -> hsa:5058( PAK1 , cytoplasm ) - 7.217161 -> hsa:984( CDC2L1 , cytoplasm )<br>- 3.307866 -> hsa:896( CCND3 , nucleus )                                                                                                                                                                                                                                                   |   |           |
| hsa:5055( SERPINB2 , extracellular ) - 69.278180 -> hsa:5328( PLAU , extracellular ) - 32.655426 -> hsa:3082( HGF ,<br>extracellular ) - 3.247723 -> hsa:4233( MET , cytoplasm ) - 2.373007 -> hsa:7409( VAV1 , cytoplasm ) - 29.522727<br>-> hsa:5879( RAC1 , golgi ) - 15.788264 -> hsa:5058( PAK1 , cytoplasm ) - 7.217161 -> hsa:984( CDC2L1 , cytoplasm )<br>- 3.307866 -> hsa:896( CCND3 , nucleus )        | 9 | 20.423794 |
| hsa:12( SERPINA3 , extracellular ) - 69.278180 -> hsa:4485( MST1 , extracellular ) - 3.247723 -> hsa:4486( MST1R ,<br>cytoplasm ) - 2.829073 -> hsa:5335( PLCG1 , cytoplasm ) - 20.265953 -> hsa:58480( RHOU , cytoplasm ) - 22.752059<br>-> hsa:5058( PAK1 , cytoplasm ) - 7.217161 -> hsa:90( ACVR1 , cytoplasm ) - 17.330023 -> hsa:4090( SMAD5 , nucleus )                                                    | 8 | 20.417167 |
| hsa:5054( SERPINE1 , extracellular ) - 69.278180 -> hsa:5328( PLAU , extracellular ) - 32.655426 -> hsa:3082( HGF ,<br>extracellular ) - 3.247723 -> hsa:4233( MET , cytoplasm ) - 2.373007 -> hsa:7409( VAV1 , cytoplasm ) - 29.522727<br>-> hsa:387( RHOA , cytoplasm ) - 2.145471 -> hsa:7046( TGFBR1 , cytoplasm ) - 3.608580 -> hsa:3987( LIMS1 , nucleus )                                                  | 8 | 20.404445 |
| hsa:5345( SERPINF2 , extracellular ) - 69.278180 -> hsa:5328( PLAU , extracellular ) - 32.655426 -> hsa:3082( HGF ,<br>extracellular ) - 3.247723 -> hsa:4233( MET , cytoplasm ) - 2.373007 -> hsa:7409( VAV1 , cytoplasm ) - 29.522727<br>-> hsa:387( RHOA , cytoplasm ) - 2.145471 -> hsa:7046( TGFBR1 , cytoplasm ) - 3.608580 -> hsa:3987( LIMS1 , nucleus )                                                  | 8 | 20.404445 |
| hsa:5269( SERPINB6 , extracellular ) - 69.278180 -> hsa:5328( PLAU , extracellular ) - 32.655426 -> hsa:3082( HGF ,<br>extracellular ) - 3.247723 -> hsa:4233( MET , cytoplasm ) - 2.373007 -> hsa:7409( VAV1 , cytoplasm ) - 29.522727<br>-> hsa:387( RHOA , cytoplasm ) - 2.145471 -> hsa:7046( TGFBR1 , cytoplasm ) - 3.608580 -> hsa:3987( LIMS1 , nucleus )                                                  | 8 | 20.404445 |
| hsa:5104( SERPINA5 , extracellular ) - 69.278180 -> hsa:5328( PLAU , extracellular ) - 32.655426 -> hsa:3082( HGF ,<br>extracellular ) - 3.247723 -> hsa:4233( MET , cytoplasm ) - 2.373007 -> hsa:7409( VAV1 , cytoplasm ) - 29.522727<br>-> hsa:387( RHOA , cytoplasm ) - 2.145471 -> hsa:7046( TGFBR1 , cytoplasm ) - 3.608580 -> hsa:3987( LIMS1 , nucleus )                                                  | 8 | 20.404445 |
| hsa:5055( SERPINB2 , extracellular ) - 69.278180 -> hsa:5328( PLAU , extracellular ) - 32.655426 -> hsa:3082( HGF ,<br>extracellular ) - 3.247723 -> hsa:4233( MET , cytoplasm ) - 2.373007 -> hsa:7409( VAV1 , cytoplasm ) - 29.522727<br>-> hsa:387( RHOA , cytoplasm ) - 2.145471 -> hsa:7046( TGFBR1 , cytoplasm ) - 3.608580 -> hsa:3987( LIMS1 , nucleus )                                                  | 8 | 20.404445 |
| hsa:654( BMP6 , extracellular ) - 65.460916 -> hsa:658( BMPR1B , cytoplasm ) - 2.524005 -> hsa:9459( ARHGEF6 ,<br>cytoplasm ) - 29.522727 -> hsa:998( CDC42 , cytoplasm ) - 2.145471 -> hsa:5590( PRKCZ , cytoplasm ) - 2.205244 -><br>hsa:5970( REL , nucleus )                                                                                                                                                  | 6 | 20.371673 |
| hsa:654( BMP6 , extracellular ) - 65.460916 -> hsa:658( BMPR1B , cytoplasm ) - 2.524005 -> hsa:9459( ARHGEF6 ,<br>cytoplasm ) - 29.522727 -> hsa:998( CDC42 , cytoplasm ) - 2.145471 -> hsa:5599( MAPK8 , cytoplasm ) - 2.205244 -><br>hsa:5966( REL , nucleus )                                                                                                                                                  | 6 | 20.371673 |
| hsa:654( BMP6 , extracellular ) - 65.460916 -> hsa:658( BMPR1B , cytoplasm ) - 2.524005 -> hsa:9459( ARHGEF6 ,<br>cytoplasm ) - 29.522727 -> hsa:998( CDC42 , cytoplasm ) - 2.145471 -> hsa:5601( MAPK9 , cytoplasm ) - 2.205244 -><br>hsa:4775( NFATC3 , nucleus )                                                                                                                                               | 6 | 20.371673 |
| hsa:654( BMP6 , extracellular ) - 65.460916 -> hsa:658( BMPR1B , cytoplasm ) - 2.524005 -> hsa:9459( ARHGEF6 ,<br>cytoplasm ) - 29.522727 -> hsa:998( CDC42 , cytoplasm ) - 2.145471 -> hsa:5590( PRKCZ , cytoplasm ) - 2.205244 -><br>hsa:4773( NFATC2 , nucleus )                                                                                                                                               | 6 | 20.371673 |
| hsa:654( BMP6 , extracellular ) - 65.460916 -> hsa:658( BMPR1B , cytoplasm ) - 2.524005 -> hsa:9459( ARHGEF6 ,<br>cytoplasm ) - 12.338863 -> hsa:28964( GIT1 , cytoplasm ) - 19.664149 -> hsa:580( BARD1 , nucleus ) - 19.664149 -><br>hsa:672( BRCA1 , nucleus ) - 5.177529 -> hsa:983( CDC2 , nucleus ) - 3.320395 -> hsa:7704( ZBTB16 , nucleus ) -<br>34.548817 -> hsa:7572( ZNF24 , nucleus )                | 9 | 20.337353 |
| hsa:5054( SERPINE1 , extracellular ) - 69.278180 -> hsa:5328( PLAU , extracellular ) - 32.655426 -> hsa:3082( HGF ,<br>extracellular ) - 3.247723 -> hsa:4233( MET , cytoplasm ) - 2.829073 -> hsa:5335( PLCG1 , cytoplasm ) - 20.265953<br>-> hsa:58480( RHOU , cytoplasm ) - 22.752059 -> hsa:5058( PAK1 , cytoplasm ) - 7.217161 -> hsa:5594( MAPK1 , cytoplasm )<br>- 4.410487 -> hsa:2516( NR5A1 , nucleus ) | 9 | 20.332008 |





|                                                                                                                                                                                                                                                                                                                                                                                                             |   |           |
|-------------------------------------------------------------------------------------------------------------------------------------------------------------------------------------------------------------------------------------------------------------------------------------------------------------------------------------------------------------------------------------------------------------|---|-----------|
| hsa:5055( SERPINB2 , extracellular ) - 69.278180 -> hsa:5328( PLAU , extracellular ) - 32.655426 -> hsa:3082( HGF , extracellular ) - 3.247723 -> hsa:4233( MET , cytoplasm ) - 2.829073 -> hsa:5335( PLCG1 , cytoplasm ) - 20.265953 -> hsa:58480( RHOU , cytoplasm ) - 22.752059 -> hsa:5058( PAK1 , cytoplasm ) - 7.217161 -> hsa:9641( IKBKE , cytoplasm ) - 4.410487 -> hsa:10642( IGF2BP1 , nucleus ) | 9 | 20.332008 |
| hsa:5055( SERPINB2 , extracellular ) - 69.278180 -> hsa:5328( PLAU , extracellular ) - 32.655426 -> hsa:3082( HGF , extracellular ) - 3.247723 -> hsa:4233( MET , cytoplasm ) - 2.829073 -> hsa:5335( PLCG1 , cytoplasm ) - 20.265953 -> hsa:58480( RHOU , cytoplasm ) - 22.752059 -> hsa:5058( PAK1 , cytoplasm ) - 7.217161 -> hsa:984( CDC2L1 , cytoplasm ) - 4.410487 -> hsa:10921( RNPS1 , nucleus )   | 9 | 20.332008 |
| hsa:654( BMP6 , extracellular ) - 65.460916 -> hsa:658( BMPR1B , cytoplasm ) - 2.524005 -> hsa:9459( ARHGEF6 , cytoplasm ) - 29.522727 -> hsa:998( CDC42 , cytoplasm ) - 15.788264 -> hsa:5062( PAK2 , cytoplasm ) - 2.206641 -> hsa:6714( SRC , cytoplasm ) - 6.482107 -> hsa:6772( STAT1 , nucleus )                                                                                                      | 7 | 20.330777 |
| hsa:5054( SERPINE1 , extracellular ) - 69.278180 -> hsa:5328( PLAU , extracellular ) - 32.655426 -> hsa:3082( HGF , extracellular ) - 3.247723 -> hsa:4233( MET , cytoplasm ) - 2.373007 -> hsa:7409( VAV1 , cytoplasm ) - 29.522727 -> hsa:5879( RAC1 , golgi ) - 15.788264 -> hsa:5062( PAK2 , cytoplasm ) - 7.217161 -> hsa:5594( MAPK1 , cytoplasm ) - 2.520278 -> hsa:8648( NCOA1 , nucleus )          | 9 | 20.325346 |
| hsa:5345( SERPINF2 , extracellular ) - 69.278180 -> hsa:5328( PLAU , extracellular ) - 32.655426 -> hsa:3082( HGF , extracellular ) - 3.247723 -> hsa:4233( MET , cytoplasm ) - 2.373007 -> hsa:7409( VAV1 , cytoplasm ) - 29.522727 -> hsa:5879( RAC1 , golgi ) - 15.788264 -> hsa:5062( PAK2 , cytoplasm ) - 7.217161 -> hsa:5594( MAPK1 , cytoplasm ) - 2.520278 -> hsa:8648( NCOA1 , nucleus )          | 9 | 20.325346 |
| hsa:5269( SERPINB6 , extracellular ) - 69.278180 -> hsa:5328( PLAU , extracellular ) - 32.655426 -> hsa:3082( HGF , extracellular ) - 3.247723 -> hsa:4233( MET , cytoplasm ) - 2.373007 -> hsa:7409( VAV1 , cytoplasm ) - 29.522727 -> hsa:5879( RAC1 , golgi ) - 15.788264 -> hsa:5062( PAK2 , cytoplasm ) - 7.217161 -> hsa:5594( MAPK1 , cytoplasm ) - 2.520278 -> hsa:8648( NCOA1 , nucleus )          | 9 | 20.325346 |
| hsa:5104( SERPINA5 , extracellular ) - 69.278180 -> hsa:5328( PLAU , extracellular ) - 32.655426 -> hsa:3082( HGF , extracellular ) - 3.247723 -> hsa:4233( MET , cytoplasm ) - 2.373007 -> hsa:7409( VAV1 , cytoplasm ) - 29.522727 -> hsa:5879( RAC1 , golgi ) - 15.788264 -> hsa:5062( PAK2 , cytoplasm ) - 7.217161 -> hsa:5594( MAPK1 , cytoplasm ) - 2.520278 -> hsa:8648( NCOA1 , nucleus )          | 9 | 20.325346 |
| hsa:5055( SERPINB2 , extracellular ) - 69.278180 -> hsa:5328( PLAU , extracellular ) - 32.655426 -> hsa:3082( HGF , extracellular ) - 3.247723 -> hsa:4233( MET , cytoplasm ) - 2.373007 -> hsa:7409( VAV1 , cytoplasm ) - 29.522727 -> hsa:5879( RAC1 , golgi ) - 15.788264 -> hsa:5062( PAK2 , cytoplasm ) - 7.217161 -> hsa:5594( MAPK1 , cytoplasm ) - 2.520278 -> hsa:8648( NCOA1 , nucleus )          | 9 | 20.325346 |
| hsa:5054( SERPINE1 , extracellular ) - 69.278180 -> hsa:5328( PLAU , extracellular ) - 32.655426 -> hsa:3082( HGF , extracellular ) - 3.247723 -> hsa:4233( MET , cytoplasm ) - 2.373007 -> hsa:7409( VAV1 , cytoplasm ) - 29.522727 -> hsa:387( RHOA , cytoplasm ) - 2.145471 -> hsa:5566( PRKACA730418 , cytoplasm ) - 3.032210 -> hsa:26993( AKAP8L , nucleus )                                          | 8 | 20.322106 |
| hsa:5054( SERPINE1 , extracellular ) - 69.278180 -> hsa:5328( PLAU , extracellular ) - 32.655426 -> hsa:3082( HGF , extracellular ) - 3.247723 -> hsa:4233( MET , cytoplasm ) - 2.373007 -> hsa:7409( VAV1 , cytoplasm ) - 29.522727 -> hsa:387( RHOA , cytoplasm ) - 2.145471 -> hsa:5566( PRKACA730418 , cytoplasm ) - 3.032210 -> hsa:7490( WT1 , nucleus )                                              | 8 | 20.322106 |
| hsa:5054( SERPINE1 , extracellular ) - 69.278180 -> hsa:5328( PLAU , extracellular ) - 32.655426 -> hsa:3082( HGF , extracellular ) - 3.247723 -> hsa:4233( MET , cytoplasm ) - 2.373007 -> hsa:7409( VAV1 , cytoplasm ) - 29.522727 -> hsa:391( RHOG , cytoplasm ) - 2.145471 -> hsa:7046( TGFBR1 , cytoplasm ) - 3.032210 -> hsa:130497( OSR1 , nucleus )                                                 | 8 | 20.322106 |
| hsa:5054( SERPINE1 , extracellular ) - 69.278180 -> hsa:5328( PLAU , extracellular ) - 32.655426 -> hsa:3082( HGF , extracellular ) - 3.247723 -> hsa:4233( MET , cytoplasm ) - 2.373007 -> hsa:7409( VAV1 , cytoplasm ) - 29.522727                                                                                                                                                                        | 8 | 20.322106 |



|                                                                                                                                                                                                                                                                                                                                                                                                     |   |           |
|-----------------------------------------------------------------------------------------------------------------------------------------------------------------------------------------------------------------------------------------------------------------------------------------------------------------------------------------------------------------------------------------------------|---|-----------|
| nucleus )                                                                                                                                                                                                                                                                                                                                                                                           |   |           |
| hsa:5104( SERPINA5 , extracellular ) - 69.278180 -> hsa:5328( PLAU , extracellular ) - 32.655426 -> hsa:3082( HGF , extracellular ) - 3.247723 -> hsa:4233( MET , cytoplasm ) - 2.373007 -> hsa:7409( VAV1 , cytoplasm ) - 29.522727 -> hsa:387( RHOA , cytoplasm ) - 2.145471 -> hsa:5566( PRKACA730418 , cytoplasm ) - 3.032210 -> hsa:7490( WT1 , nucleus )                                      | 8 | 20.322106 |
| hsa:5104( SERPINA5 , extracellular ) - 69.278180 -> hsa:5328( PLAU , extracellular ) - 32.655426 -> hsa:3082( HGF , extracellular ) - 3.247723 -> hsa:4233( MET , cytoplasm ) - 2.373007 -> hsa:7409( VAV1 , cytoplasm ) - 29.522727 -> hsa:391( RHOG , cytoplasm ) - 2.145471 -> hsa:7046( TGFBR1 , cytoplasm ) - 3.032210 -> hsa:130497( OSR1 , nucleus )                                         | 8 | 20.322106 |
| hsa:5104( SERPINA5 , extracellular ) - 69.278180 -> hsa:5328( PLAU , extracellular ) - 32.655426 -> hsa:3082( HGF , extracellular ) - 3.247723 -> hsa:4233( MET , cytoplasm ) - 2.373007 -> hsa:7409( VAV1 , cytoplasm ) - 29.522727 -> hsa:387( RHOA , cytoplasm ) - 2.145471 -> hsa:7046( TGFBR1 , cytoplasm ) - 3.032210 -> hsa:130497( OSR1 , nucleus )                                         | 8 | 20.322106 |
| hsa:5104( SERPINA5 , extracellular ) - 69.278180 -> hsa:5328( PLAU , extracellular ) - 32.655426 -> hsa:3082( HGF , extracellular ) - 3.247723 -> hsa:4233( MET , cytoplasm ) - 2.373007 -> hsa:7409( VAV1 , cytoplasm ) - 29.522727 -> hsa:387( RHOA , cytoplasm ) - 2.145471 -> hsa:5566( PRKACA730418 , cytoplasm ) - 3.032210 -> hsa:10661( KLF1 , nucleus )                                    | 8 | 20.322106 |
| hsa:5055( SERPINB2 , extracellular ) - 69.278180 -> hsa:5328( PLAU , extracellular ) - 32.655426 -> hsa:3082( HGF , extracellular ) - 3.247723 -> hsa:4233( MET , cytoplasm ) - 2.373007 -> hsa:7409( VAV1 , cytoplasm ) - 29.522727 -> hsa:387( RHOA , cytoplasm ) - 2.145471 -> hsa:5566( PRKACA730418 , cytoplasm ) - 3.032210 -> hsa:26993( AKAP8L , nucleus )                                  | 8 | 20.322106 |
| hsa:5055( SERPINB2 , extracellular ) - 69.278180 -> hsa:5328( PLAU , extracellular ) - 32.655426 -> hsa:3082( HGF , extracellular ) - 3.247723 -> hsa:4233( MET , cytoplasm ) - 2.373007 -> hsa:7409( VAV1 , cytoplasm ) - 29.522727 -> hsa:387( RHOA , cytoplasm ) - 2.145471 -> hsa:5566( PRKACA730418 , cytoplasm ) - 3.032210 -> hsa:7490( WT1 , nucleus )                                      | 8 | 20.322106 |
| hsa:5055( SERPINB2 , extracellular ) - 69.278180 -> hsa:5328( PLAU , extracellular ) - 32.655426 -> hsa:3082( HGF , extracellular ) - 3.247723 -> hsa:4233( MET , cytoplasm ) - 2.373007 -> hsa:7409( VAV1 , cytoplasm ) - 29.522727 -> hsa:391( RHOG , cytoplasm ) - 2.145471 -> hsa:7046( TGFBR1 , cytoplasm ) - 3.032210 -> hsa:130497( OSR1 , nucleus )                                         | 8 | 20.322106 |
| hsa:5055( SERPINB2 , extracellular ) - 69.278180 -> hsa:5328( PLAU , extracellular ) - 32.655426 -> hsa:3082( HGF , extracellular ) - 3.247723 -> hsa:4233( MET , cytoplasm ) - 2.373007 -> hsa:7409( VAV1 , cytoplasm ) - 29.522727 -> hsa:387( RHOA , cytoplasm ) - 2.145471 -> hsa:5566( PRKACA730418 , cytoplasm ) - 3.032210 -> hsa:10661( KLF1 , nucleus )                                    | 8 | 20.322106 |
| hsa:5054( SERPINE1 , extracellular ) - 69.278180 -> hsa:5328( PLAU , extracellular ) - 32.655426 -> hsa:3082( HGF , extracellular ) - 3.247723 -> hsa:4233( MET , cytoplasm ) - 2.373007 -> hsa:7409( VAV1 , cytoplasm ) - 29.522727 -> hsa:5879( RAC1 , golgi ) - 15.788264 -> hsa:5058( PAK1 , cytoplasm ) - 7.217161 -> hsa:7048( TGFBR2 , cytoplasm ) - 2.205244 -> hsa:9133( CCNB2 , nucleus ) | 9 | 20.285966 |
| hsa:5054( SERPINE1 , extracellular ) - 69.278180 -> hsa:5328( PLAU , extracellular ) - 32.655426 -> hsa:3082( HGF , extracellular ) - 3.247723 -> hsa:4233( MET , cytoplasm ) - 2.373007 -> hsa:7409( VAV1 , cytoplasm ) - 29.522727 -> hsa:5879( RAC1 , golgi ) - 15.788264 -> hsa:5058( PAK1 , cytoplasm ) - 7.217161 -> hsa:7048( TGFBR2 , cytoplasm ) - 2.205244 -> hsa:891( CCNB1 , nucleus )  | 9 | 20.285966 |
| hsa:5054( SERPINE1 , extracellular ) - 69.278180 -> hsa:5328( PLAU , extracellular ) - 32.655426 -> hsa:3082( HGF , extracellular ) - 3.247723 -> hsa:4233( MET , cytoplasm ) - 2.373007 -> hsa:7409( VAV1 , cytoplasm ) - 29.522727 -> hsa:5879( RAC1 , golgi ) - 15.788264 -> hsa:5058( PAK1 , cytoplasm ) - 7.217161 -> hsa:1020( CDK5 , cytoplasm )                                             | 9 | 20.285966 |







|                                                                                                                                                                                                                                                                                                                                                                                                  |   |           |
|--------------------------------------------------------------------------------------------------------------------------------------------------------------------------------------------------------------------------------------------------------------------------------------------------------------------------------------------------------------------------------------------------|---|-----------|
| - 2.205244 -> hsa:81669( CCNL2 , nucleus )                                                                                                                                                                                                                                                                                                                                                       |   |           |
| hsa:5054( SERPINE1 , extracellular ) - 69.278180 -> hsa:5328( PLAU , extracellular ) - 32.655426 -> hsa:3082( HGF , extracellular ) - 3.247723 -> hsa:4233( MET , cytoplasm ) - 2.373007 -> hsa:7409( VAV1 , cytoplasm ) - 29.522727 -> hsa:5879( RAC1 , golgi ) - 15.788264 -> hsa:5058( PAK1 , cytoplasm ) - 3.913667 -> hsa:207( AKT1 , cytoplasm ) - 5.390596 -> hsa:1385( CREB1 , nucleus ) | 9 | 20.271199 |
| hsa:5345( SERPINF2 , extracellular ) - 69.278180 -> hsa:5328( PLAU , extracellular ) - 32.655426 -> hsa:3082( HGF , extracellular ) - 3.247723 -> hsa:4233( MET , cytoplasm ) - 2.373007 -> hsa:7409( VAV1 , cytoplasm ) - 29.522727 -> hsa:5879( RAC1 , golgi ) - 15.788264 -> hsa:5058( PAK1 , cytoplasm ) - 3.913667 -> hsa:207( AKT1 , cytoplasm ) - 5.390596 -> hsa:1385( CREB1 , nucleus ) | 9 | 20.271199 |
| hsa:5269( SERPINB6 , extracellular ) - 69.278180 -> hsa:5328( PLAU , extracellular ) - 32.655426 -> hsa:3082( HGF , extracellular ) - 3.247723 -> hsa:4233( MET , cytoplasm ) - 2.373007 -> hsa:7409( VAV1 , cytoplasm ) - 29.522727 -> hsa:5879( RAC1 , golgi ) - 15.788264 -> hsa:5058( PAK1 , cytoplasm ) - 3.913667 -> hsa:207( AKT1 , cytoplasm ) - 5.390596 -> hsa:1385( CREB1 , nucleus ) | 9 | 20.271199 |
| hsa:5104( SERPINA5 , extracellular ) - 69.278180 -> hsa:5328( PLAU , extracellular ) - 32.655426 -> hsa:3082( HGF , extracellular ) - 3.247723 -> hsa:4233( MET , cytoplasm ) - 2.373007 -> hsa:7409( VAV1 , cytoplasm ) - 29.522727 -> hsa:5879( RAC1 , golgi ) - 15.788264 -> hsa:5058( PAK1 , cytoplasm ) - 3.913667 -> hsa:207( AKT1 , cytoplasm ) - 5.390596 -> hsa:1385( CREB1 , nucleus ) | 9 | 20.271199 |
| hsa:5055( SERPINB2 , extracellular ) - 69.278180 -> hsa:5328( PLAU , extracellular ) - 32.655426 -> hsa:3082( HGF , extracellular ) - 3.247723 -> hsa:4233( MET , cytoplasm ) - 2.373007 -> hsa:7409( VAV1 , cytoplasm ) - 29.522727 -> hsa:5879( RAC1 , golgi ) - 15.788264 -> hsa:5058( PAK1 , cytoplasm ) - 3.913667 -> hsa:207( AKT1 , cytoplasm ) - 5.390596 -> hsa:1385( CREB1 , nucleus ) | 9 | 20.271199 |
| hsa:654( BMP6 , extracellular ) - 65.460916 -> hsa:658( BMPRI1B , cytoplasm ) - 2.524005 -> hsa:9459( ARHGAP6 , cytoplasm ) - 29.522727 -> hsa:998( CDC42 , cytoplasm ) - 15.788264 -> hsa:5058( PAK1 , cytoplasm ) - 3.913667 -> hsa:207( AKT1 , cytoplasm ) - 4.410487 -> hsa:1026( CDKN1A , nucleus )                                                                                         | 7 | 20.270011 |
| hsa:5054( SERPINE1 , extracellular ) - 69.278180 -> hsa:5328( PLAU , extracellular ) - 32.655426 -> hsa:3082( HGF , extracellular ) - 3.247723 -> hsa:4233( MET , cytoplasm ) - 2.373007 -> hsa:7409( VAV1 , cytoplasm ) - 29.522727 -> hsa:5879( RAC1 , golgi ) - 15.788264 -> hsa:5058( PAK1 , cytoplasm ) - 3.913667 -> hsa:207( AKT1 , cytoplasm ) - 5.337007 -> hsa:79026( AHNK , nucleus ) | 9 | 20.2645   |
| hsa:5345( SERPINF2 , extracellular ) - 69.278180 -> hsa:5328( PLAU , extracellular ) - 32.655426 -> hsa:3082( HGF , extracellular ) - 3.247723 -> hsa:4233( MET , cytoplasm ) - 2.373007 -> hsa:7409( VAV1 , cytoplasm ) - 29.522727 -> hsa:5879( RAC1 , golgi ) - 15.788264 -> hsa:5058( PAK1 , cytoplasm ) - 3.913667 -> hsa:207( AKT1 , cytoplasm ) - 5.337007 -> hsa:79026( AHNK , nucleus ) | 9 | 20.2645   |
| hsa:5269( SERPINB6 , extracellular ) - 69.278180 -> hsa:5328( PLAU , extracellular ) - 32.655426 -> hsa:3082( HGF , extracellular ) - 3.247723 -> hsa:4233( MET , cytoplasm ) - 2.373007 -> hsa:7409( VAV1 , cytoplasm ) - 29.522727 -> hsa:5879( RAC1 , golgi ) - 15.788264 -> hsa:5058( PAK1 , cytoplasm ) - 3.913667 -> hsa:207( AKT1 , cytoplasm ) - 5.337007 -> hsa:79026( AHNK , nucleus ) | 9 | 20.2645   |
| hsa:5104( SERPINA5 , extracellular ) - 69.278180 -> hsa:5328( PLAU , extracellular ) - 32.655426 -> hsa:3082( HGF , extracellular ) - 3.247723 -> hsa:4233( MET , cytoplasm ) - 2.373007 -> hsa:7409( VAV1 , cytoplasm ) - 29.522727 -> hsa:5879( RAC1 , golgi ) - 15.788264 -> hsa:5058( PAK1 , cytoplasm ) - 3.913667 -> hsa:207( AKT1 , cytoplasm ) - 5.337007 -> hsa:79026( AHNK , nucleus ) | 9 | 20.2645   |
| hsa:5055( SERPINB2 , extracellular ) - 69.278180 -> hsa:5328( PLAU , extracellular ) - 32.655426 -> hsa:3082( HGF , extracellular ) - 3.247723 -> hsa:4233( MET , cytoplasm ) - 2.373007 -> hsa:7409( VAV1 , cytoplasm ) - 29.522727 -> hsa:5879( RAC1 , golgi ) - 15.788264 -> hsa:5058( PAK1 , cytoplasm ) - 3.913667 -> hsa:207( AKT1 , cytoplasm ) - 5.337007 -> hsa:79026( AHNK , nucleus ) | 9 | 20.2645   |









|                                                                                                                                                                                                                                                                                                                                                     |   |           |
|-----------------------------------------------------------------------------------------------------------------------------------------------------------------------------------------------------------------------------------------------------------------------------------------------------------------------------------------------------|---|-----------|
| -> hsa:998( CDC42 , cytoplasm ) - 2.145471 -> hsa:5610( EIF2AK2 , nucleus ) - 2.071011 -> hsa:6772( STAT1 , nucleus )                                                                                                                                                                                                                               |   |           |
| hsa:5055( SERPINB2 , extracellular ) - 69.278180 -> hsa:5328( PLAU , extracellular ) - 32.655426 -> hsa:3082( HGF , extracellular ) - 3.247723 -> hsa:4233( MET , cytoplasm ) - 2.373007 -> hsa:7409( VAV1 , cytoplasm ) - 29.522727                                                                                                                | 8 | 20.184792 |
| -> hsa:5879( RAC1 , golgi ) - 2.145471 -> hsa:5610( EIF2AK2 , nucleus ) - 2.071011 -> hsa:6772( STAT1 , nucleus )                                                                                                                                                                                                                                   |   |           |
| hsa:5055( SERPINB2 , extracellular ) - 69.278180 -> hsa:5328( PLAU , extracellular ) - 32.655426 -> hsa:3082( HGF , extracellular ) - 3.247723 -> hsa:4233( MET , cytoplasm ) - 2.373007 -> hsa:7409( VAV1 , cytoplasm ) - 29.522727                                                                                                                | 8 | 20.184792 |
| -> hsa:998( CDC42 , cytoplasm ) - 2.145471 -> hsa:5610( EIF2AK2 , nucleus ) - 2.071011 -> hsa:6772( STAT1 , nucleus )                                                                                                                                                                                                                               |   |           |
| hsa:5054( SERPINE1 , extracellular ) - 69.278180 -> hsa:5328( PLAU , extracellular ) - 32.655426 -> hsa:3082( HGF , extracellular ) - 3.247723 -> hsa:4233( MET , cytoplasm ) - 2.829073 -> hsa:5335( PLCG1 , cytoplasm ) - 20.265953                                                                                                               | 9 | 20.159723 |
| -> hsa:58480( RHOU , cytoplasm ) - 22.752059 -> hsa:5058( PAK1 , cytoplasm ) - 7.217161 -> hsa:5594( MAPK1 , cytoplasm ) - 3.032210 -> hsa:8462( KLF11 , nucleus )                                                                                                                                                                                  |   |           |
| hsa:5345( SERPINF2 , extracellular ) - 69.278180 -> hsa:5328( PLAU , extracellular ) - 32.655426 -> hsa:3082( HGF , extracellular ) - 3.247723 -> hsa:4233( MET , cytoplasm ) - 2.829073 -> hsa:5335( PLCG1 , cytoplasm ) - 20.265953                                                                                                               | 9 | 20.159723 |
| -> hsa:58480( RHOU , cytoplasm ) - 22.752059 -> hsa:5058( PAK1 , cytoplasm ) - 7.217161 -> hsa:5594( MAPK1 , cytoplasm ) - 3.032210 -> hsa:8462( KLF11 , nucleus )                                                                                                                                                                                  |   |           |
| hsa:5269( SERPINB6 , extracellular ) - 69.278180 -> hsa:5328( PLAU , extracellular ) - 32.655426 -> hsa:3082( HGF , extracellular ) - 3.247723 -> hsa:4233( MET , cytoplasm ) - 2.829073 -> hsa:5335( PLCG1 , cytoplasm ) - 20.265953                                                                                                               | 9 | 20.159723 |
| -> hsa:58480( RHOU , cytoplasm ) - 22.752059 -> hsa:5058( PAK1 , cytoplasm ) - 7.217161 -> hsa:5594( MAPK1 , cytoplasm ) - 3.032210 -> hsa:8462( KLF11 , nucleus )                                                                                                                                                                                  |   |           |
| hsa:5104( SERPINA5 , extracellular ) - 69.278180 -> hsa:5328( PLAU , extracellular ) - 32.655426 -> hsa:3082( HGF , extracellular ) - 3.247723 -> hsa:4233( MET , cytoplasm ) - 2.829073 -> hsa:5335( PLCG1 , cytoplasm ) - 20.265953                                                                                                               | 9 | 20.159723 |
| -> hsa:58480( RHOU , cytoplasm ) - 22.752059 -> hsa:5058( PAK1 , cytoplasm ) - 7.217161 -> hsa:5594( MAPK1 , cytoplasm ) - 3.032210 -> hsa:8462( KLF11 , nucleus )                                                                                                                                                                                  |   |           |
| hsa:5055( SERPINB2 , extracellular ) - 69.278180 -> hsa:5328( PLAU , extracellular ) - 32.655426 -> hsa:3082( HGF , extracellular ) - 3.247723 -> hsa:4233( MET , cytoplasm ) - 2.829073 -> hsa:5335( PLCG1 , cytoplasm ) - 20.265953                                                                                                               | 9 | 20.159723 |
| -> hsa:58480( RHOU , cytoplasm ) - 22.752059 -> hsa:5058( PAK1 , cytoplasm ) - 7.217161 -> hsa:5594( MAPK1 , cytoplasm ) - 3.032210 -> hsa:8462( KLF11 , nucleus )                                                                                                                                                                                  |   |           |
| hsa:654( BMP6 , extracellular ) - 65.460916 -> hsa:658( BMPR1B , cytoplasm ) - 2.524005 -> hsa:9459( ARHGEF6 , cytoplasm ) - 12.338863 -> hsa:28964( GIT1 , cytoplasm ) - 19.664149 -> hsa:580( BARD1 , nucleus ) - 19.664149 -> hsa:672( BRCA1 , nucleus ) - 5.177529 -> hsa:25( ABL129892 , cytoplasm ) - 16.171787 -> hsa:7161( TP73 , nucleus ) | 8 | 20.143057 |
| hsa:12( SERPINA3 , extracellular ) - 69.278180 -> hsa:4485( MST1 , extracellular ) - 3.247723 -> hsa:4486( MST1R , cytoplasm ) - 2.829073 -> hsa:5335( PLCG1 , cytoplasm ) - 20.265953 -> hsa:58480( RHOU , cytoplasm ) - 22.752059                                                                                                                 | 8 | 20.107939 |
| -> hsa:5058( PAK1 , cytoplasm ) - 3.913667 -> hsa:207( AKT1 , cytoplasm ) - 18.468916 -> hsa:3064( HD , nucleus )                                                                                                                                                                                                                                   |   |           |
| hsa:5054( SERPINE1 , extracellular ) - 69.278180 -> hsa:5328( PLAU , extracellular ) - 32.655426 -> hsa:3082( HGF , extracellular ) - 3.247723 -> hsa:4233( MET , cytoplasm ) - 2.829073 -> hsa:5335( PLCG1 , cytoplasm ) - 20.265953                                                                                                               | 9 | 20.095732 |
| -> hsa:58480( RHOU , cytoplasm ) - 22.752059 -> hsa:5058( PAK1 , cytoplasm ) - 7.217161 -> hsa:5594( MAPK1 , cytoplasm ) - 2.520278 -> hsa:8202( NCOA3 , nucleus )                                                                                                                                                                                  |   |           |
| hsa:5054( SERPINE1 , extracellular ) - 69.278180 -> hsa:5328( PLAU , extracellular ) - 32.655426 -> hsa:3082( HGF , extracellular ) - 3.247723 -> hsa:4233( MET , cytoplasm ) - 2.829073 -> hsa:5335( PLCG1 , cytoplasm ) - 20.265953                                                                                                               | 9 | 20.095732 |
| -> hsa:58480( RHOU , cytoplasm ) - 22.752059 -> hsa:5058( PAK1 , cytoplasm ) - 7.217161 -> hsa:5594( MAPK1 , cytoplasm ) - 2.520278 -> hsa:8648( NCOA1 , nucleus )                                                                                                                                                                                  |   |           |
| hsa:5345( SERPINF2 , extracellular ) - 69.278180 -> hsa:5328( PLAU , extracellular ) - 32.655426 -> hsa:3082( HGF , extracellular ) - 3.247723 -> hsa:4233( MET , cytoplasm ) - 2.829073 -> hsa:5335( PLCG1 , cytoplasm ) - 20.265953                                                                                                               | 9 | 20.095732 |
| -> hsa:58480( RHOU , cytoplasm ) - 22.752059 -> hsa:5058( PAK1 , cytoplasm ) - 7.217161 -> hsa:5594( MAPK1 , cytoplasm )                                                                                                                                                                                                                            |   |           |





|                                                                                                                                                                                                                                                                                                                                                                                                                                                  |    |           |
|--------------------------------------------------------------------------------------------------------------------------------------------------------------------------------------------------------------------------------------------------------------------------------------------------------------------------------------------------------------------------------------------------------------------------------------------------|----|-----------|
| - 2.205244 -> hsa:81669( CCNL2 , nucleus )                                                                                                                                                                                                                                                                                                                                                                                                       |    |           |
| hsa:5055( SERPINB2 , extracellular ) - 69.278180 -> hsa:5328( PLAU , extracellular ) - 32.655426 -> hsa:3082( HGF , extracellular ) - 3.247723 -> hsa:4233( MET , cytoplasm ) - 2.829073 -> hsa:5335( PLCG1 , cytoplasm ) - 20.265953 -> hsa:58480( RHOU , cytoplasm ) - 22.752059 -> hsa:5058( PAK1 , cytoplasm ) - 7.217161 -> hsa:984( CDC2L1 , cytoplasm ) - 2.205244 -> hsa:81669( CCNL2 , nucleus )                                        | 9  | 20.056352 |
| hsa:654( BMP6 , extracellular ) - 65.460916 -> hsa:658( BMPR1B , cytoplasm ) - 2.524005 -> hsa:9459( ARHGEF6 , cytoplasm ) - 12.338863 -> hsa:28964( GIT1 , cytoplasm ) - 19.664149 -> hsa:580( BARD1 , nucleus ) - 2.288050 -> hsa:983( CDC2 , nucleus ) - 3.320395 -> hsa:7704( ZBTB16 , nucleus ) - 34.548817 -> hsa:27033( ZBTB32 , nucleus )                                                                                                | 8  | 20.020742 |
| hsa:654( BMP6 , extracellular ) - 65.460916 -> hsa:658( BMPR1B , cytoplasm ) - 2.524005 -> hsa:9459( ARHGEF6 , cytoplasm ) - 12.338863 -> hsa:28964( GIT1 , cytoplasm ) - 19.664149 -> hsa:580( BARD1 , nucleus ) - 2.288050 -> hsa:983( CDC2 , nucleus ) - 3.320395 -> hsa:7704( ZBTB16 , nucleus ) - 34.548817 -> hsa:7572( ZNF24 , nucleus )                                                                                                  | 8  | 20.020742 |
| hsa:5054( SERPINE1 , extracellular ) - 69.278180 -> hsa:5328( PLAU , extracellular ) - 32.655426 -> hsa:3082( HGF , extracellular ) - 3.247723 -> hsa:4233( MET , cytoplasm ) - 2.829073 -> hsa:5335( PLCG1 , cytoplasm ) - 12.338863 -> hsa:28964( GIT1 , cytoplasm ) - 19.664149 -> hsa:580( BARD1 , nucleus ) - 2.288050 -> hsa:983( CDC2 , nucleus ) - 3.320395 -> hsa:7704( ZBTB16 , nucleus ) - 34.548817 -> hsa:27033( ZBTB32 , nucleus ) | 10 | 20.018964 |
| hsa:5345( SERPINF2 , extracellular ) - 69.278180 -> hsa:5328( PLAU , extracellular ) - 32.655426 -> hsa:3082( HGF , extracellular ) - 3.247723 -> hsa:4233( MET , cytoplasm ) - 2.829073 -> hsa:5335( PLCG1 , cytoplasm ) - 12.338863 -> hsa:28964( GIT1 , cytoplasm ) - 19.664149 -> hsa:580( BARD1 , nucleus ) - 2.288050 -> hsa:983( CDC2 , nucleus ) - 3.320395 -> hsa:7704( ZBTB16 , nucleus ) - 34.548817 -> hsa:27033( ZBTB32 , nucleus ) | 10 | 20.018964 |
| hsa:5269( SERPINB6 , extracellular ) - 69.278180 -> hsa:5328( PLAU , extracellular ) - 32.655426 -> hsa:3082( HGF , extracellular ) - 3.247723 -> hsa:4233( MET , cytoplasm ) - 2.829073 -> hsa:5335( PLCG1 , cytoplasm ) - 12.338863 -> hsa:28964( GIT1 , cytoplasm ) - 19.664149 -> hsa:580( BARD1 , nucleus ) - 2.288050 -> hsa:983( CDC2 , nucleus ) - 3.320395 -> hsa:7704( ZBTB16 , nucleus ) - 34.548817 -> hsa:27033( ZBTB32 , nucleus ) | 10 | 20.018964 |
| hsa:5104( SERPINA5 , extracellular ) - 69.278180 -> hsa:5328( PLAU , extracellular ) - 32.655426 -> hsa:3082( HGF , extracellular ) - 3.247723 -> hsa:4233( MET , cytoplasm ) - 2.829073 -> hsa:5335( PLCG1 , cytoplasm ) - 12.338863 -> hsa:28964( GIT1 , cytoplasm ) - 19.664149 -> hsa:580( BARD1 , nucleus ) - 2.288050 -> hsa:983( CDC2 , nucleus ) - 3.320395 -> hsa:7704( ZBTB16 , nucleus ) - 34.548817 -> hsa:27033( ZBTB32 , nucleus ) | 10 | 20.018964 |
| hsa:5055( SERPINB2 , extracellular ) - 69.278180 -> hsa:5328( PLAU , extracellular ) - 32.655426 -> hsa:3082( HGF , extracellular ) - 3.247723 -> hsa:4233( MET , cytoplasm ) - 2.829073 -> hsa:5335( PLCG1 , cytoplasm ) - 12.338863 -> hsa:28964( GIT1 , cytoplasm ) - 19.664149 -> hsa:580( BARD1 , nucleus ) - 2.288050 -> hsa:983( CDC2 , nucleus ) - 3.320395 -> hsa:7704( ZBTB16 , nucleus ) - 34.548817 -> hsa:27033( ZBTB32 , nucleus ) | 10 | 20.018964 |
| hsa:5054( SERPINE1 , extracellular ) - 69.278180 -> hsa:5328( PLAU , extracellular ) - 32.655426 -> hsa:3082( HGF , extracellular ) - 3.247723 -> hsa:4233( MET , cytoplasm ) - 2.373007 -> hsa:7409( VAV1 , cytoplasm ) - 29.522727 -> hsa:5879( RAC1 , golgi ) - 15.788264 -> hsa:5058( PAK1 , cytoplasm ) - 2.738090 -> hsa:5580( PRKCD , cytoplasm ) - 4.410487 -> hsa:2101( ESRRA , nucleus )                                               | 9  | 20.001738 |
| hsa:5345( SERPINF2 , extracellular ) - 69.278180 -> hsa:5328( PLAU , extracellular ) - 32.655426 -> hsa:3082( HGF , extracellular ) - 3.247723 -> hsa:4233( MET , cytoplasm ) - 2.373007 -> hsa:7409( VAV1 , cytoplasm ) - 29.522727 -> hsa:5879( RAC1 , golgi ) - 15.788264 -> hsa:5058( PAK1 , cytoplasm ) - 2.738090 -> hsa:5580( PRKCD , cytoplasm ) - 4.410487 -> hsa:2101( ESRRA , nucleus )                                               | 9  | 20.001738 |
| hsa:5269( SERPINB6 , extracellular ) - 69.278180 -> hsa:5328( PLAU , extracellular ) - 32.655426 -> hsa:3082( HGF , extracellular ) - 3.247723 -> hsa:4233( MET , cytoplasm ) - 2.373007 -> hsa:7409( VAV1 , cytoplasm ) - 29.522727 -> hsa:5879( RAC1 , golgi ) - 15.788264 -> hsa:5058( PAK1 , cytoplasm ) - 2.738090 -> hsa:5580( PRKCD , cytoplasm ) - 4.410487 -> hsa:2101( ESRRA , nucleus )                                               | 9  | 20.001738 |
| hsa:5104( SERPINA5 , extracellular ) - 69.278180 -> hsa:5328( PLAU , extracellular ) - 32.655426 -> hsa:3082( HGF , extracellular ) - 3.247723 -> hsa:4233( MET , cytoplasm ) - 2.373007 -> hsa:7409( VAV1 , cytoplasm ) - 29.522727 -> hsa:5879( RAC1 , golgi ) - 15.788264 -> hsa:5058( PAK1 , cytoplasm ) - 2.738090 -> hsa:5580( PRKCD , cytoplasm ) - 4.410487 -> hsa:2101( ESRRA , nucleus )                                               | 9  | 20.001738 |

|                                                                                                                                                                                                                                                                                                                                                                                                                                                                 |    |           |
|-----------------------------------------------------------------------------------------------------------------------------------------------------------------------------------------------------------------------------------------------------------------------------------------------------------------------------------------------------------------------------------------------------------------------------------------------------------------|----|-----------|
| extracellular ) - 3.247723 -> hsa:4233( MET , cytoplasm ) - 2.373007 -> hsa:7409( VAV1 , cytoplasm ) - 29.522727<br>-> hsa:5879( RAC1 , golgi ) - 15.788264 -> hsa:5058( PAK1 , cytoplasm ) - 2.738090 -> hsa:5580( PRKCD , cytoplasm )<br>- 4.410487 -> hsa:2101( ESRR , nucleus )                                                                                                                                                                             |    |           |
| hsa:5055( SERPINB2 , extracellular ) - 69.278180 -> hsa:5328( PLAU , extracellular ) - 32.655426 -> hsa:3082( HGF ,<br>extracellular ) - 3.247723 -> hsa:4233( MET , cytoplasm ) - 2.373007 -> hsa:7409( VAV1 , cytoplasm ) - 29.522727<br>-> hsa:5879( RAC1 , golgi ) - 15.788264 -> hsa:5058( PAK1 , cytoplasm ) - 2.738090 -> hsa:5580( PRKCD , cytoplasm )<br>- 4.410487 -> hsa:2101( ESRR , nucleus )                                                      | 9  | 20.001738 |
| hsa:5054( SERPINE1 , extracellular ) - 69.278180 -> hsa:5328( PLAU , extracellular ) - 32.655426 -> hsa:3082( HGF ,<br>extracellular ) - 3.247723 -> hsa:4233( MET , cytoplasm ) - 2.373007 -> hsa:7409( VAV1 , cytoplasm ) - 29.522727<br>-> hsa:998( CDC42 , cytoplasm ) - 15.788264 -> hsa:5062( PAK2 , cytoplasm ) - 2.206641 -> hsa:6714( SRC , cytoplasm )<br>- 4.410487 -> hsa:5467( PPAR , nucleus )                                                    | 9  | 19.935307 |
| hsa:5345( SERPINF2 , extracellular ) - 69.278180 -> hsa:5328( PLAU , extracellular ) - 32.655426 -> hsa:3082( HGF ,<br>extracellular ) - 3.247723 -> hsa:4233( MET , cytoplasm ) - 2.373007 -> hsa:7409( VAV1 , cytoplasm ) - 29.522727<br>-> hsa:998( CDC42 , cytoplasm ) - 15.788264 -> hsa:5062( PAK2 , cytoplasm ) - 2.206641 -> hsa:6714( SRC , cytoplasm )<br>- 4.410487 -> hsa:5467( PPAR , nucleus )                                                    | 9  | 19.935307 |
| hsa:5269( SERPINB6 , extracellular ) - 69.278180 -> hsa:5328( PLAU , extracellular ) - 32.655426 -> hsa:3082( HGF ,<br>extracellular ) - 3.247723 -> hsa:4233( MET , cytoplasm ) - 2.373007 -> hsa:7409( VAV1 , cytoplasm ) - 29.522727<br>-> hsa:998( CDC42 , cytoplasm ) - 15.788264 -> hsa:5062( PAK2 , cytoplasm ) - 2.206641 -> hsa:6714( SRC , cytoplasm )<br>- 4.410487 -> hsa:5467( PPAR , nucleus )                                                    | 9  | 19.935307 |
| hsa:5104( SERPINA5 , extracellular ) - 69.278180 -> hsa:5328( PLAU , extracellular ) - 32.655426 -> hsa:3082( HGF ,<br>extracellular ) - 3.247723 -> hsa:4233( MET , cytoplasm ) - 2.373007 -> hsa:7409( VAV1 , cytoplasm ) - 29.522727<br>-> hsa:998( CDC42 , cytoplasm ) - 15.788264 -> hsa:5062( PAK2 , cytoplasm ) - 2.206641 -> hsa:6714( SRC , cytoplasm )<br>- 4.410487 -> hsa:5467( PPAR , nucleus )                                                    | 9  | 19.935307 |
| hsa:5055( SERPINB2 , extracellular ) - 69.278180 -> hsa:5328( PLAU , extracellular ) - 32.655426 -> hsa:3082( HGF ,<br>extracellular ) - 3.247723 -> hsa:4233( MET , cytoplasm ) - 2.373007 -> hsa:7409( VAV1 , cytoplasm ) - 29.522727<br>-> hsa:998( CDC42 , cytoplasm ) - 15.788264 -> hsa:5062( PAK2 , cytoplasm ) - 2.206641 -> hsa:6714( SRC , cytoplasm )<br>- 4.410487 -> hsa:5467( PPAR , nucleus )                                                    | 9  | 19.935307 |
| hsa:12( SERPINA3 , extracellular ) - 69.278180 -> hsa:4485( MST1 , extracellular ) - 3.247723 -> hsa:4486( MST1R ,<br>cytoplasm ) - 2.071011 -> hsa:5295( PIK3R1 , cytoplasm ) - 12.016980 -> hsa:392( ARHGAP1 , cytoplasm ) - 33.843739<br>-> hsa:387( RHOA , cytoplasm ) - 2.145471 -> hsa:5578( PRKCA , cytoplasm ) - 16.171787 -> hsa:7157( TP53 , nucleus )                                                                                                | 8  | 19.824984 |
| hsa:5054( SERPINE1 , extracellular ) - 69.278180 -> hsa:5328( PLAU , extracellular ) - 32.655426 -> hsa:3082( HGF ,<br>extracellular ) - 3.247723 -> hsa:4233( MET , cytoplasm ) - 2.373007 -> hsa:7409( VAV1 , cytoplasm ) - 29.522727<br>-> hsa:3265( HRAS , cytoplasm ) - 2.145471 -> hsa:3656( IRAK2 , cytoplasm ) - 23.645307 -> hsa:7189( TRAF6 , cytoplasm )<br>- 6.595756 -> hsa:4215( MAP3K3 , cytoplasm ) - 8.820974 -> hsa:7316( unknown , nucleus ) | 10 | 19.809397 |
| hsa:5345( SERPINF2 , extracellular ) - 69.278180 -> hsa:5328( PLAU , extracellular ) - 32.655426 -> hsa:3082( HGF ,<br>extracellular ) - 3.247723 -> hsa:4233( MET , cytoplasm ) - 2.373007 -> hsa:7409( VAV1 , cytoplasm ) - 29.522727<br>-> hsa:3265( HRAS , cytoplasm ) - 2.145471 -> hsa:3656( IRAK2 , cytoplasm ) - 23.645307 -> hsa:7189( TRAF6 , cytoplasm )<br>- 6.595756 -> hsa:4215( MAP3K3 , cytoplasm ) - 8.820974 -> hsa:7316( unknown , nucleus ) | 10 | 19.809397 |
| hsa:5269( SERPINB6 , extracellular ) - 69.278180 -> hsa:5328( PLAU , extracellular ) - 32.655426 -> hsa:3082( HGF ,<br>extracellular ) - 3.247723 -> hsa:4233( MET , cytoplasm ) - 2.373007 -> hsa:7409( VAV1 , cytoplasm ) - 29.522727<br>-> hsa:3265( HRAS , cytoplasm ) - 2.145471 -> hsa:3656( IRAK2 , cytoplasm ) - 23.645307 -> hsa:7189( TRAF6 , cytoplasm )<br>- 6.595756 -> hsa:4215( MAP3K3 , cytoplasm ) - 8.820974 -> hsa:7316( unknown , nucleus ) | 10 | 19.809397 |
| hsa:5104( SERPINA5 , extracellular ) - 69.278180 -> hsa:5328( PLAU , extracellular ) - 32.655426 -> hsa:3082( HGF ,<br>extracellular ) - 3.247723 -> hsa:4233( MET , cytoplasm ) - 2.373007 -> hsa:7409( VAV1 , cytoplasm ) - 29.522727                                                                                                                                                                                                                         | 10 | 19.809397 |

|                                                                                                                                                                                                                                                                                                                                                                                                                                         |    |           |
|-----------------------------------------------------------------------------------------------------------------------------------------------------------------------------------------------------------------------------------------------------------------------------------------------------------------------------------------------------------------------------------------------------------------------------------------|----|-----------|
| -> hsa:3265(HRAS, cytoplasm) - 2.145471 -> hsa:3656( IRAK2, cytoplasm) - 23.645307 -> hsa:7189( TRAF6, cytoplasm)<br>- 6.595756 -> hsa:4215( MAP3K3, cytoplasm) - 8.820974 -> hsa:7316( unknown, nucleus)                                                                                                                                                                                                                               |    |           |
| hsa:5055( SERPINB2, extracellular) - 69.278180 -> hsa:5328( PLAU, extracellular) - 32.655426 -> hsa:3082( HGF, extracellular) - 3.247723 -> hsa:4233( MET, cytoplasm) - 2.373007 -> hsa:7409( VAV1, cytoplasm) - 29.522727<br>-> hsa:3265(HRAS, cytoplasm) - 2.145471 -> hsa:3656( IRAK2, cytoplasm) - 23.645307 -> hsa:7189( TRAF6, cytoplasm)<br>- 6.595756 -> hsa:4215( MAP3K3, cytoplasm) - 8.820974 -> hsa:7316( unknown, nucleus) | 10 | 19.809397 |
| hsa:5054( SERPINE1, extracellular) - 69.278180 -> hsa:5328( PLAU, extracellular) - 32.655426 -> hsa:3082( HGF, extracellular) - 3.247723 -> hsa:4233( MET, cytoplasm) - 2.829073 -> hsa:5335( PLCG1, cytoplasm) - 12.338863<br>-> hsa:28964( GIT1, cytoplasm) - 19.664149 -> hsa:580( BARD1, nucleus) - 2.288050 -> hsa:983( CDC2, nucleus)<br>- 16.171787 -> hsa:7161( TP73, nucleus)                                                  | 9  | 19.809156 |
| hsa:5345( SERPINF2, extracellular) - 69.278180 -> hsa:5328( PLAU, extracellular) - 32.655426 -> hsa:3082( HGF, extracellular) - 3.247723 -> hsa:4233( MET, cytoplasm) - 2.829073 -> hsa:5335( PLCG1, cytoplasm) - 12.338863<br>-> hsa:28964( GIT1, cytoplasm) - 19.664149 -> hsa:580( BARD1, nucleus) - 2.288050 -> hsa:983( CDC2, nucleus)<br>- 16.171787 -> hsa:7161( TP73, nucleus)                                                  | 9  | 19.809156 |
| hsa:5269( SERPINB6, extracellular) - 69.278180 -> hsa:5328( PLAU, extracellular) - 32.655426 -> hsa:3082( HGF, extracellular) - 3.247723 -> hsa:4233( MET, cytoplasm) - 2.829073 -> hsa:5335( PLCG1, cytoplasm) - 12.338863<br>-> hsa:28964( GIT1, cytoplasm) - 19.664149 -> hsa:580( BARD1, nucleus) - 2.288050 -> hsa:983( CDC2, nucleus)<br>- 16.171787 -> hsa:7161( TP73, nucleus)                                                  | 9  | 19.809156 |
| hsa:5104( SERPINA5, extracellular) - 69.278180 -> hsa:5328( PLAU, extracellular) - 32.655426 -> hsa:3082( HGF, extracellular) - 3.247723 -> hsa:4233( MET, cytoplasm) - 2.829073 -> hsa:5335( PLCG1, cytoplasm) - 12.338863<br>-> hsa:28964( GIT1, cytoplasm) - 19.664149 -> hsa:580( BARD1, nucleus) - 2.288050 -> hsa:983( CDC2, nucleus)<br>- 16.171787 -> hsa:7161( TP73, nucleus)                                                  | 9  | 19.809156 |
| hsa:5055( SERPINB2, extracellular) - 69.278180 -> hsa:5328( PLAU, extracellular) - 32.655426 -> hsa:3082( HGF, extracellular) - 3.247723 -> hsa:4233( MET, cytoplasm) - 2.829073 -> hsa:5335( PLCG1, cytoplasm) - 12.338863<br>-> hsa:28964( GIT1, cytoplasm) - 19.664149 -> hsa:580( BARD1, nucleus) - 2.288050 -> hsa:983( CDC2, nucleus)<br>- 16.171787 -> hsa:7161( TP73, nucleus)                                                  | 9  | 19.809156 |
| hsa:5054( SERPINE1, extracellular) - 69.278180 -> hsa:5328( PLAU, extracellular) - 32.655426 -> hsa:3082( HGF, extracellular) - 3.247723 -> hsa:4233( MET, cytoplasm) - 2.829073 -> hsa:5335( PLCG1, cytoplasm) - 12.338863<br>-> hsa:28964( GIT1, cytoplasm) - 19.664149 -> hsa:580( BARD1, nucleus) - 19.664149 -> hsa:672( BRCA1, nucleus)<br>- 5.177529 -> hsa:1019( CDK4, cytoplasm) - 13.231462 -> hsa:64210( MMS19, nucleus)     | 10 | 19.787395 |
| hsa:5345( SERPINF2, extracellular) - 69.278180 -> hsa:5328( PLAU, extracellular) - 32.655426 -> hsa:3082( HGF, extracellular) - 3.247723 -> hsa:4233( MET, cytoplasm) - 2.829073 -> hsa:5335( PLCG1, cytoplasm) - 12.338863<br>-> hsa:28964( GIT1, cytoplasm) - 19.664149 -> hsa:580( BARD1, nucleus) - 19.664149 -> hsa:672( BRCA1, nucleus)<br>- 5.177529 -> hsa:1019( CDK4, cytoplasm) - 13.231462 -> hsa:64210( MMS19, nucleus)     | 10 | 19.787395 |
| hsa:5269( SERPINB6, extracellular) - 69.278180 -> hsa:5328( PLAU, extracellular) - 32.655426 -> hsa:3082( HGF, extracellular) - 3.247723 -> hsa:4233( MET, cytoplasm) - 2.829073 -> hsa:5335( PLCG1, cytoplasm) - 12.338863<br>-> hsa:28964( GIT1, cytoplasm) - 19.664149 -> hsa:580( BARD1, nucleus) - 19.664149 -> hsa:672( BRCA1, nucleus)<br>- 5.177529 -> hsa:1019( CDK4, cytoplasm) - 13.231462 -> hsa:64210( MMS19, nucleus)     | 10 | 19.787395 |
| hsa:5104( SERPINA5, extracellular) - 69.278180 -> hsa:5328( PLAU, extracellular) - 32.655426 -> hsa:3082( HGF, extracellular) - 3.247723 -> hsa:4233( MET, cytoplasm) - 2.829073 -> hsa:5335( PLCG1, cytoplasm) - 12.338863<br>-> hsa:28964( GIT1, cytoplasm) - 19.664149 -> hsa:580( BARD1, nucleus) - 19.664149 -> hsa:672( BRCA1, nucleus)<br>- 5.177529 -> hsa:1019( CDK4, cytoplasm) - 13.231462 -> hsa:64210( MMS19, nucleus)     | 10 | 19.787395 |
| hsa:5055( SERPINB2, extracellular) - 69.278180 -> hsa:5328( PLAU, extracellular) - 32.655426 -> hsa:3082( HGF, extracellular) - 3.247723 -> hsa:4233( MET, cytoplasm) - 2.829073 -> hsa:5335( PLCG1, cytoplasm) - 12.338863                                                                                                                                                                                                             | 10 | 19.787395 |

|                                                                                                                                                                                                                                                                                                                                                                                                                 |   |           |
|-----------------------------------------------------------------------------------------------------------------------------------------------------------------------------------------------------------------------------------------------------------------------------------------------------------------------------------------------------------------------------------------------------------------|---|-----------|
| -> hsa:28964( GIT1 , cytoplasm ) - 19.664149 -> hsa:580( BARD1 , nucleus ) - 19.664149 -> hsa:672( BRCA1 , nucleus )                                                                                                                                                                                                                                                                                            |   |           |
| - 5.177529 -> hsa:1019( CDK4 , cytoplasm ) - 13.231462 -> hsa:64210( MMS19 , nucleus )                                                                                                                                                                                                                                                                                                                          |   |           |
| hsa:12( SERPINA3 , extracellular ) - 69.278180 -> hsa:4485( MST1 , extracellular ) - 3.247723 -> hsa:4486( MST1R , cytoplasm ) - 2.071011 -> hsa:3717( JAK2 , cytoplasm ) - 4.410487 -> hsa:10146( G3BP1 , nucleus )                                                                                                                                                                                            | 5 | 19.75185  |
| hsa:5054( SERPINE1 , extracellular ) - 69.278180 -> hsa:5328( PLAU , extracellular ) - 32.655426 -> hsa:3082( HGF , extracellular ) - 3.247723 -> hsa:4233( MET , cytoplasm ) - 2.071011 -> hsa:5295( PIK3R1 , cytoplasm ) - 12.016980 -> hsa:392( ARHGAP1 , cytoplasm ) - 33.843739 -> hsa:387( RHOA , cytoplasm ) - 2.145471 -> hsa:5566( PRKACA730418 , cytoplasm ) - 2.205244 -> hsa:595( CCND1 , nucleus ) | 9 | 19.682972 |
| hsa:5345( SERPINF2 , extracellular ) - 69.278180 -> hsa:5328( PLAU , extracellular ) - 32.655426 -> hsa:3082( HGF , extracellular ) - 3.247723 -> hsa:4233( MET , cytoplasm ) - 2.071011 -> hsa:5295( PIK3R1 , cytoplasm ) - 12.016980 -> hsa:392( ARHGAP1 , cytoplasm ) - 33.843739 -> hsa:387( RHOA , cytoplasm ) - 2.145471 -> hsa:5566( PRKACA730418 , cytoplasm ) - 2.205244 -> hsa:595( CCND1 , nucleus ) | 9 | 19.682972 |
| hsa:5269( SERPINB6 , extracellular ) - 69.278180 -> hsa:5328( PLAU , extracellular ) - 32.655426 -> hsa:3082( HGF , extracellular ) - 3.247723 -> hsa:4233( MET , cytoplasm ) - 2.071011 -> hsa:5295( PIK3R1 , cytoplasm ) - 12.016980 -> hsa:392( ARHGAP1 , cytoplasm ) - 33.843739 -> hsa:387( RHOA , cytoplasm ) - 2.145471 -> hsa:5566( PRKACA730418 , cytoplasm ) - 2.205244 -> hsa:595( CCND1 , nucleus ) | 9 | 19.682972 |
| hsa:5104( SERPINA5 , extracellular ) - 69.278180 -> hsa:5328( PLAU , extracellular ) - 32.655426 -> hsa:3082( HGF , extracellular ) - 3.247723 -> hsa:4233( MET , cytoplasm ) - 2.071011 -> hsa:5295( PIK3R1 , cytoplasm ) - 12.016980 -> hsa:392( ARHGAP1 , cytoplasm ) - 33.843739 -> hsa:387( RHOA , cytoplasm ) - 2.145471 -> hsa:5566( PRKACA730418 , cytoplasm ) - 2.205244 -> hsa:595( CCND1 , nucleus ) | 9 | 19.682972 |
| hsa:5055( SERPINB2 , extracellular ) - 69.278180 -> hsa:5328( PLAU , extracellular ) - 32.655426 -> hsa:3082( HGF , extracellular ) - 3.247723 -> hsa:4233( MET , cytoplasm ) - 2.071011 -> hsa:5295( PIK3R1 , cytoplasm ) - 12.016980 -> hsa:392( ARHGAP1 , cytoplasm ) - 33.843739 -> hsa:387( RHOA , cytoplasm ) - 2.145471 -> hsa:5566( PRKACA730418 , cytoplasm ) - 2.205244 -> hsa:595( CCND1 , nucleus ) | 9 | 19.682972 |
| hsa:654( BMP6 , extracellular ) - 65.460916 -> hsa:658( BMPR1B , cytoplasm ) - 2.524005 -> hsa:9459( ARHGEF6 , cytoplasm ) - 29.522727 -> hsa:998( CDC42 , cytoplasm ) - 15.788264 -> hsa:5062( PAK2 , cytoplasm ) - 2.206641 -> hsa:25( ABL129892 , cytoplasm ) - 2.205244 -> hsa:91768( CABLES1 , nucleus )                                                                                                   | 7 | 19.617966 |
| hsa:654( BMP6 , extracellular ) - 65.460916 -> hsa:658( BMPR1B , cytoplasm ) - 2.524005 -> hsa:9459( ARHGEF6 , cytoplasm ) - 29.522727 -> hsa:998( CDC42 , cytoplasm ) - 15.788264 -> hsa:5062( PAK2 , cytoplasm ) - 2.206641 -> hsa:25( ABL129892 , cytoplasm ) - 2.205244 -> hsa:81928( CABLES2 , nucleus )                                                                                                   | 7 | 19.617966 |
| hsa:654( BMP6 , extracellular ) - 65.460916 -> hsa:658( BMPR1B , cytoplasm ) - 2.071011 -> hsa:1123( CHN1 , cytoplasm ) - 33.843739 -> hsa:5879( RAC1 , golgi ) - 2.145471 -> hsa:5610( EIF2AK2 , nucleus ) - 8.820974 -> hsa:1147( CHUK , cytoplasm ) - 4.410487 -> hsa:7182( NR2C2 , nucleus )                                                                                                                | 7 | 19.458766 |
| hsa:654( BMP6 , extracellular ) - 65.460916 -> hsa:658( BMPR1B , cytoplasm ) - 2.071011 -> hsa:1123( CHN1 , cytoplasm ) - 33.843739 -> hsa:5879( RAC1 , golgi ) - 15.788264 -> hsa:5062( PAK2 , cytoplasm ) - 2.460392 -> hsa:8874( ARHGEF7 , cytoplasm ) - 29.522727 -> hsa:998( CDC42 , cytoplasm ) - 2.145471 -> hsa:5601( MAPK9 , cytoplasm ) - 4.211403 -> hsa:11016( ATF7 , nucleus )                     | 9 | 19.43799  |
| hsa:3625( INHBB , extracellular ) - 65.460916 -> hsa:90( ACVR1 , cytoplasm ) - 2.071011 -> hsa:9306( SOCS6 , cytoplasm ) - 7.622199 -> hsa:8660( IRS2 , cytoplasm ) - 4.398215 -> hsa:5335( PLCG1 , cytoplasm ) - 12.338863 -> hsa:28964( GIT1 , cytoplasm ) - 19.664149 -> hsa:580( BARD1 , nucleus ) - 19.664149 -> hsa:672( BRCA1 , nucleus ) - 24.033959 -> hsa:5887( RAD23B , nucleus )                    | 9 | 19.406683 |
| hsa:3626( INHBC , extracellular ) - 65.460916 -> hsa:90( ACVR1 , cytoplasm ) - 2.071011 -> hsa:9306( SOCS6 , cytoplasm ) - 7.622199 -> hsa:8660( IRS2 , cytoplasm ) - 4.398215 -> hsa:5335( PLCG1 , cytoplasm ) - 12.338863 -> hsa:28964( GIT1 , cytoplasm ) - 19.664149 -> hsa:580( BARD1 , nucleus ) - 19.664149 -> hsa:672( BRCA1 , nucleus ) - 24.033959 ->                                                 | 9 | 19.406683 |



|                                                                                                                                                                                                                                                                                                                                                                  |   |           |
|------------------------------------------------------------------------------------------------------------------------------------------------------------------------------------------------------------------------------------------------------------------------------------------------------------------------------------------------------------------|---|-----------|
| nucleus )                                                                                                                                                                                                                                                                                                                                                        |   |           |
| hsa:5345( SERPINF2 , extracellular ) - 69.278180 -> hsa:5328( PLAU , extracellular ) - 32.655426 -> hsa:3082( HGF , extracellular ) - 3.247723 -> hsa:4233( MET , cytoplasm ) - 2.829073 -> hsa:5335( PLCG1 , cytoplasm ) - 20.265953 -> hsa:387( RHOA , cytoplasm ) - 2.145471 -> hsa:5566( PRKACA730418 , cytoplasm ) - 4.410487 -> hsa:2099( ESR1 , nucleus ) | 8 | 19.261759 |
| hsa:5269( SERPINB6 , extracellular ) - 69.278180 -> hsa:5328( PLAU , extracellular ) - 32.655426 -> hsa:3082( HGF , extracellular ) - 3.247723 -> hsa:4233( MET , cytoplasm ) - 2.829073 -> hsa:5335( PLCG1 , cytoplasm ) - 20.265953 -> hsa:387( RHOA , cytoplasm ) - 2.145471 -> hsa:5566( PRKACA730418 , cytoplasm ) - 4.410487 -> hsa:2099( ESR1 , nucleus ) | 8 | 19.261759 |
| hsa:5104( SERPINA5 , extracellular ) - 69.278180 -> hsa:5328( PLAU , extracellular ) - 32.655426 -> hsa:3082( HGF , extracellular ) - 3.247723 -> hsa:4233( MET , cytoplasm ) - 2.829073 -> hsa:5335( PLCG1 , cytoplasm ) - 20.265953 -> hsa:387( RHOA , cytoplasm ) - 2.145471 -> hsa:5566( PRKACA730418 , cytoplasm ) - 4.410487 -> hsa:2099( ESR1 , nucleus ) | 8 | 19.261759 |
| hsa:5055( SERPINB2 , extracellular ) - 69.278180 -> hsa:5328( PLAU , extracellular ) - 32.655426 -> hsa:3082( HGF , extracellular ) - 3.247723 -> hsa:4233( MET , cytoplasm ) - 2.829073 -> hsa:5335( PLCG1 , cytoplasm ) - 20.265953 -> hsa:387( RHOA , cytoplasm ) - 2.145471 -> hsa:5566( PRKACA730418 , cytoplasm ) - 4.410487 -> hsa:2099( ESR1 , nucleus ) | 8 | 19.261759 |
| hsa:12( SERPINA3 , extracellular ) - 69.278180 -> hsa:4485( MST1 , extracellular ) - 3.247723 -> hsa:4486( MST1R , cytoplasm ) - 2.829073 -> hsa:5335( PLCG1 , cytoplasm ) - 20.265953 -> hsa:58480( RHOU , cytoplasm ) - 22.752059 -> hsa:5058( PAK1 , cytoplasm ) - 7.217161 -> hsa:9641( IKBKE , cytoplasm ) - 8.820974 -> hsa:10291( SF3A1 , nucleus )       | 8 | 19.201589 |
| hsa:12( SERPINA3 , extracellular ) - 69.278180 -> hsa:4485( MST1 , extracellular ) - 3.247723 -> hsa:4486( MST1R , cytoplasm ) - 2.829073 -> hsa:5335( PLCG1 , cytoplasm ) - 20.265953 -> hsa:387( RHOA , cytoplasm ) - 2.145471 -> hsa:7046( TGFBR1 , cytoplasm ) - 17.330023 -> hsa:4091( SMAD6 , nucleus )                                                    | 7 | 19.182737 |
| hsa:12( SERPINA3 , extracellular ) - 69.278180 -> hsa:4485( MST1 , extracellular ) - 3.247723 -> hsa:4486( MST1R , cytoplasm ) - 2.829073 -> hsa:5335( PLCG1 , cytoplasm ) - 20.265953 -> hsa:387( RHOA , cytoplasm ) - 2.145471 -> hsa:7046( TGFBR1 , cytoplasm ) - 17.330023 -> hsa:4089( SMAD4 , nucleus )                                                    | 7 | 19.182737 |
| hsa:12( SERPINA3 , extracellular ) - 69.278180 -> hsa:4485( MST1 , extracellular ) - 3.247723 -> hsa:4486( MST1R , cytoplasm ) - 2.829073 -> hsa:5335( PLCG1 , cytoplasm ) - 20.265953 -> hsa:387( RHOA , cytoplasm ) - 2.145471 -> hsa:7046( TGFBR1 , cytoplasm ) - 17.330023 -> hsa:4088( SMAD3 , nucleus )                                                    | 7 | 19.182737 |
| hsa:12( SERPINA3 , extracellular ) - 69.278180 -> hsa:4485( MST1 , extracellular ) - 3.247723 -> hsa:4486( MST1R , cytoplasm ) - 2.829073 -> hsa:5335( PLCG1 , cytoplasm ) - 20.265953 -> hsa:387( RHOA , cytoplasm ) - 2.145471 -> hsa:7046( TGFBR1 , cytoplasm ) - 17.330023 -> hsa:4092( SMAD7 , nucleus )                                                    | 7 | 19.182737 |
| hsa:12( SERPINA3 , extracellular ) - 69.278180 -> hsa:4485( MST1 , extracellular ) - 3.247723 -> hsa:4486( MST1R , cytoplasm ) - 2.829073 -> hsa:5335( PLCG1 , cytoplasm ) - 20.265953 -> hsa:387( RHOA , cytoplasm ) - 2.145471 -> hsa:7046( TGFBR1 , cytoplasm ) - 17.330023 -> hsa:4086( SMAD1 , nucleus )                                                    | 7 | 19.182737 |
| hsa:12( SERPINA3 , extracellular ) - 69.278180 -> hsa:4485( MST1 , extracellular ) - 3.247723 -> hsa:4486( MST1R , cytoplasm ) - 2.829073 -> hsa:5335( PLCG1 , cytoplasm ) - 20.265953 -> hsa:387( RHOA , cytoplasm ) - 2.145471 -> hsa:7046( TGFBR1 , cytoplasm ) - 17.330023 -> hsa:4087( SMAD2 , nucleus )                                                    | 7 | 19.182737 |
| hsa:654( BMP6 , extracellular ) - 65.460916 -> hsa:658( BMPR1B , cytoplasm ) - 2.524005 -> hsa:9459( ARHGEF6 , cytoplasm ) - 12.338863 -> hsa:28964( GIT1 , cytoplasm ) - 19.664149 -> hsa:580( BARD1 , nucleus ) - 19.664149 -> hsa:672( BRCA1 , nucleus ) - 5.177529 -> hsa:3716( JAK1 , cytoplasm ) - 9.046825 -> hsa:6773( STAT2 , nucleus )                 | 8 | 19.125205 |
| hsa:654( BMP6 , extracellular ) - 65.460916 -> hsa:658( BMPR1B , cytoplasm ) - 2.524005 -> hsa:9459( ARHGEF6 , cytoplasm ) - 12.338863 -> hsa:28964( GIT1 , cytoplasm ) - 19.664149 -> hsa:580( BARD1 , nucleus ) - 19.664149 -> hsa:672( BRCA1 , nucleus ) - 5.177529 -> hsa:3717( JAK2 , cytoplasm ) - 9.046825 -> hsa:6773( STAT2 , nucleus )                 | 8 | 19.125205 |

|                                                                                                                                                                                                                                                                                                                                                                                                     |   |           |
|-----------------------------------------------------------------------------------------------------------------------------------------------------------------------------------------------------------------------------------------------------------------------------------------------------------------------------------------------------------------------------------------------------|---|-----------|
| hsa:3625( INHBB , extracellular ) - 65.460916 -> hsa:90( ACVR1 , cytoplasm ) - 2.071011 -> hsa:1123( CHN1 , cytoplasm )<br>- 33.843739 -> hsa:5879( RAC1 , golgi ) - 2.145471 -> hsa:5610( EIF2AK2 , nucleus ) - 8.820974 -> hsa:1147( CHUK ,<br>cytoplasm ) - 2.205244 -> hsa:5971( RELB , nucleus )                                                                                               | 7 | 19.091226 |
| hsa:3626( INHBC , extracellular ) - 65.460916 -> hsa:90( ACVR1 , cytoplasm ) - 2.071011 -> hsa:1123( CHN1 , cytoplasm )<br>- 33.843739 -> hsa:5879( RAC1 , golgi ) - 2.145471 -> hsa:5610( EIF2AK2 , nucleus ) - 8.820974 -> hsa:1147( CHUK ,<br>cytoplasm ) - 2.205244 -> hsa:5971( RELB , nucleus )                                                                                               | 7 | 19.091226 |
| hsa:5054( SERPINE1 , extracellular ) - 69.278180 -> hsa:5328( PLAU , extracellular ) - 32.655426 -> hsa:3082( HGF ,<br>extracellular ) - 3.247723 -> hsa:4233( MET , cytoplasm ) - 2.071011 -> hsa:6464( SHC1 , cytoplasm ) - 2.563870<br>-> hsa:5578( PRKCA , cytoplasm ) - 4.410487 -> hsa:5465( PPARA , nucleus )                                                                                | 7 | 19.037783 |
| hsa:5054( SERPINE1 , extracellular ) - 69.278180 -> hsa:5328( PLAU , extracellular ) - 32.655426 -> hsa:3082( HGF ,<br>extracellular ) - 3.247723 -> hsa:4233( MET , cytoplasm ) - 2.071011 -> hsa:6464( SHC1 , cytoplasm ) - 2.563870<br>-> hsa:5578( PRKCA , cytoplasm ) - 4.410487 -> hsa:5914( RARA , nucleus )                                                                                 | 7 | 19.037783 |
| hsa:5345( SERPINF2 , extracellular ) - 69.278180 -> hsa:5328( PLAU , extracellular ) - 32.655426 -> hsa:3082( HGF ,<br>extracellular ) - 3.247723 -> hsa:4233( MET , cytoplasm ) - 2.071011 -> hsa:6464( SHC1 , cytoplasm ) - 2.563870<br>-> hsa:5578( PRKCA , cytoplasm ) - 4.410487 -> hsa:5465( PPARA , nucleus )                                                                                | 7 | 19.037783 |
| hsa:5345( SERPINF2 , extracellular ) - 69.278180 -> hsa:5328( PLAU , extracellular ) - 32.655426 -> hsa:3082( HGF ,<br>extracellular ) - 3.247723 -> hsa:4233( MET , cytoplasm ) - 2.071011 -> hsa:6464( SHC1 , cytoplasm ) - 2.563870<br>-> hsa:5578( PRKCA , cytoplasm ) - 4.410487 -> hsa:5914( RARA , nucleus )                                                                                 | 7 | 19.037783 |
| hsa:5269( SERPINB6 , extracellular ) - 69.278180 -> hsa:5328( PLAU , extracellular ) - 32.655426 -> hsa:3082( HGF ,<br>extracellular ) - 3.247723 -> hsa:4233( MET , cytoplasm ) - 2.071011 -> hsa:6464( SHC1 , cytoplasm ) - 2.563870<br>-> hsa:5578( PRKCA , cytoplasm ) - 4.410487 -> hsa:5465( PPARA , nucleus )                                                                                | 7 | 19.037783 |
| hsa:5269( SERPINB6 , extracellular ) - 69.278180 -> hsa:5328( PLAU , extracellular ) - 32.655426 -> hsa:3082( HGF ,<br>extracellular ) - 3.247723 -> hsa:4233( MET , cytoplasm ) - 2.071011 -> hsa:6464( SHC1 , cytoplasm ) - 2.563870<br>-> hsa:5578( PRKCA , cytoplasm ) - 4.410487 -> hsa:5914( RARA , nucleus )                                                                                 | 7 | 19.037783 |
| hsa:5104( SERPINA5 , extracellular ) - 69.278180 -> hsa:5328( PLAU , extracellular ) - 32.655426 -> hsa:3082( HGF ,<br>extracellular ) - 3.247723 -> hsa:4233( MET , cytoplasm ) - 2.071011 -> hsa:6464( SHC1 , cytoplasm ) - 2.563870<br>-> hsa:5578( PRKCA , cytoplasm ) - 4.410487 -> hsa:5465( PPARA , nucleus )                                                                                | 7 | 19.037783 |
| hsa:5104( SERPINA5 , extracellular ) - 69.278180 -> hsa:5328( PLAU , extracellular ) - 32.655426 -> hsa:3082( HGF ,<br>extracellular ) - 3.247723 -> hsa:4233( MET , cytoplasm ) - 2.071011 -> hsa:6464( SHC1 , cytoplasm ) - 2.563870<br>-> hsa:5578( PRKCA , cytoplasm ) - 4.410487 -> hsa:5914( RARA , nucleus )                                                                                 | 7 | 19.037783 |
| hsa:5055( SERPINB2 , extracellular ) - 69.278180 -> hsa:5328( PLAU , extracellular ) - 32.655426 -> hsa:3082( HGF ,<br>extracellular ) - 3.247723 -> hsa:4233( MET , cytoplasm ) - 2.071011 -> hsa:6464( SHC1 , cytoplasm ) - 2.563870<br>-> hsa:5578( PRKCA , cytoplasm ) - 4.410487 -> hsa:5465( PPARA , nucleus )                                                                                | 7 | 19.037783 |
| hsa:5055( SERPINB2 , extracellular ) - 69.278180 -> hsa:5328( PLAU , extracellular ) - 32.655426 -> hsa:3082( HGF ,<br>extracellular ) - 3.247723 -> hsa:4233( MET , cytoplasm ) - 2.071011 -> hsa:6464( SHC1 , cytoplasm ) - 2.563870<br>-> hsa:5578( PRKCA , cytoplasm ) - 4.410487 -> hsa:5914( RARA , nucleus )                                                                                 | 7 | 19.037783 |
| hsa:654( BMP6 , extracellular ) - 65.460916 -> hsa:658( BMPR1B , cytoplasm ) - 2.524005 -> hsa:9459( ARHGEF6 ,<br>cytoplasm ) - 29.522727 -> hsa:998( CDC42 , cytoplasm ) - 15.788264 -> hsa:5062( PAK2 , cytoplasm ) - 7.217161 -><br>hsa:5595( MAPK3 , nucleus ) - 3.032210 -> hsa:6667( SPI1 , nucleus ) - 4.506367 -> hsa:672( BRCA1 , nucleus ) - 24.033959<br>-> hsa:5887( RAD23B , nucleus ) | 9 | 19.010701 |
| hsa:5054( SERPINE1 , extracellular ) - 69.278180 -> hsa:5328( PLAU , extracellular ) - 32.655426 -> hsa:3082( HGF ,<br>extracellular ) - 3.247723 -> hsa:4233( MET , cytoplasm ) - 2.071011 -> hsa:6464( SHC1 , cytoplasm ) - 2.563870<br>-> hsa:5578( PRKCA , cytoplasm ) - 4.410487 -> hsa:2130( EWSR1 , nucleus ) - 18.025470 -> hsa:6297( SALL2 , nucleus )                                     | 8 | 18.893167 |
| hsa:5345( SERPINF2 , extracellular ) - 69.278180 -> hsa:5328( PLAU , extracellular ) - 32.655426 -> hsa:3082( HGF ,                                                                                                                                                                                                                                                                                 | 8 | 18.893167 |

|                                                                                                                                                                                                                                                                                                                                                                                                                                                 |    |           |
|-------------------------------------------------------------------------------------------------------------------------------------------------------------------------------------------------------------------------------------------------------------------------------------------------------------------------------------------------------------------------------------------------------------------------------------------------|----|-----------|
| extracellular ) - 3.247723 -> hsa:4233( MET , cytoplasm ) - 2.071011 -> hsa:6464( SHC1 , cytoplasm ) - 2.563870<br>-> hsa:5578( PRKCA , cytoplasm ) - 4.410487 -> hsa:2130( EWSR1 , nucleus ) - 18.025470 -> hsa:6297( SALL2 , nucleus )                                                                                                                                                                                                        |    |           |
| hsa:5269( SERPINB6 , extracellular ) - 69.278180 -> hsa:5328( PLAU , extracellular ) - 32.655426 -> hsa:3082( HGF , extracellular ) - 3.247723 -> hsa:4233( MET , cytoplasm ) - 2.071011 -> hsa:6464( SHC1 , cytoplasm ) - 2.563870<br>-> hsa:5578( PRKCA , cytoplasm ) - 4.410487 -> hsa:2130( EWSR1 , nucleus ) - 18.025470 -> hsa:6297( SALL2 , nucleus )                                                                                    | 8  | 18.893167 |
| hsa:5104( SERPINA5 , extracellular ) - 69.278180 -> hsa:5328( PLAU , extracellular ) - 32.655426 -> hsa:3082( HGF , extracellular ) - 3.247723 -> hsa:4233( MET , cytoplasm ) - 2.071011 -> hsa:6464( SHC1 , cytoplasm ) - 2.563870<br>-> hsa:5578( PRKCA , cytoplasm ) - 4.410487 -> hsa:2130( EWSR1 , nucleus ) - 18.025470 -> hsa:6297( SALL2 , nucleus )                                                                                    | 8  | 18.893167 |
| hsa:5055( SERPINB2 , extracellular ) - 69.278180 -> hsa:5328( PLAU , extracellular ) - 32.655426 -> hsa:3082( HGF , extracellular ) - 3.247723 -> hsa:4233( MET , cytoplasm ) - 2.071011 -> hsa:6464( SHC1 , cytoplasm ) - 2.563870<br>-> hsa:5578( PRKCA , cytoplasm ) - 4.410487 -> hsa:2130( EWSR1 , nucleus ) - 18.025470 -> hsa:6297( SALL2 , nucleus )                                                                                    | 8  | 18.893167 |
| hsa:12( SERPINA3 , extracellular ) - 69.278180 -> hsa:4485( MST1 , extracellular ) - 3.247723 -> hsa:4486( MST1R , cytoplasm ) - 2.071011 -> hsa:5295( PIK3R1 , cytoplasm ) - 3.776765 -> hsa:1399( CRKL , cytoplasm ) - 2.692116 -> hsa:57498( KIDINS220 , cytoplasm ) - 19.664149 -> hsa:4804( NGFR , extracellular ) - 26.023495 -> hsa:7186( TRAF2 , cytoplasm ) - 24.033959 -> hsa:5886( RAD23A , nucleus )                                | 9  | 18.848425 |
| hsa:3625( INHBB , extracellular ) - 65.460916 -> hsa:90( ACVR1 , cytoplasm ) - 2.071011 -> hsa:1123( CHN1 , cytoplasm ) - 33.843739 -> hsa:5879( RAC1 , golgi ) - 15.788264 -> hsa:5062( PAK2 , cytoplasm ) - 7.217161 -> hsa:5595( MAPK3 , nucleus ) - 3.032210 -> hsa:6667( SP1 , nucleus ) - 4.506367 -> hsa:1958( EGR1 , nucleus )                                                                                                          | 8  | 18.845667 |
| hsa:3626( INHBC , extracellular ) - 65.460916 -> hsa:90( ACVR1 , cytoplasm ) - 2.071011 -> hsa:1123( CHN1 , cytoplasm ) - 33.843739 -> hsa:5879( RAC1 , golgi ) - 15.788264 -> hsa:5062( PAK2 , cytoplasm ) - 7.217161 -> hsa:5595( MAPK3 , nucleus ) - 3.032210 -> hsa:6667( SP1 , nucleus ) - 4.506367 -> hsa:1958( EGR1 , nucleus )                                                                                                          | 8  | 18.845667 |
| hsa:5054( SERPINE1 , extracellular ) - 69.278180 -> hsa:5328( PLAU , extracellular ) - 32.655426 -> hsa:3082( HGF , extracellular ) - 3.247723 -> hsa:4233( MET , cytoplasm ) - 2.829073 -> hsa:5335( PLCG1 , cytoplasm ) - 12.338863<br>-> hsa:28964( GIT1 , cytoplasm ) - 19.664149 -> hsa:580( BARD1 , nucleus ) - 19.664149 -> hsa:672( BRCA1 , nucleus ) - 5.177529 -> hsa:1022( CDK7 , nucleus ) - 4.410487 -> hsa:7067( THRA , nucleus ) | 10 | 18.807287 |
| hsa:5345( SERPINF2 , extracellular ) - 69.278180 -> hsa:5328( PLAU , extracellular ) - 32.655426 -> hsa:3082( HGF , extracellular ) - 3.247723 -> hsa:4233( MET , cytoplasm ) - 2.829073 -> hsa:5335( PLCG1 , cytoplasm ) - 12.338863<br>-> hsa:28964( GIT1 , cytoplasm ) - 19.664149 -> hsa:580( BARD1 , nucleus ) - 19.664149 -> hsa:672( BRCA1 , nucleus ) - 5.177529 -> hsa:1022( CDK7 , nucleus ) - 4.410487 -> hsa:7067( THRA , nucleus ) | 10 | 18.807287 |
| hsa:5269( SERPINB6 , extracellular ) - 69.278180 -> hsa:5328( PLAU , extracellular ) - 32.655426 -> hsa:3082( HGF , extracellular ) - 3.247723 -> hsa:4233( MET , cytoplasm ) - 2.829073 -> hsa:5335( PLCG1 , cytoplasm ) - 12.338863<br>-> hsa:28964( GIT1 , cytoplasm ) - 19.664149 -> hsa:580( BARD1 , nucleus ) - 19.664149 -> hsa:672( BRCA1 , nucleus ) - 5.177529 -> hsa:1022( CDK7 , nucleus ) - 4.410487 -> hsa:7067( THRA , nucleus ) | 10 | 18.807287 |
| hsa:5104( SERPINA5 , extracellular ) - 69.278180 -> hsa:5328( PLAU , extracellular ) - 32.655426 -> hsa:3082( HGF , extracellular ) - 3.247723 -> hsa:4233( MET , cytoplasm ) - 2.829073 -> hsa:5335( PLCG1 , cytoplasm ) - 12.338863<br>-> hsa:28964( GIT1 , cytoplasm ) - 19.664149 -> hsa:580( BARD1 , nucleus ) - 19.664149 -> hsa:672( BRCA1 , nucleus ) - 5.177529 -> hsa:1022( CDK7 , nucleus ) - 4.410487 -> hsa:7067( THRA , nucleus ) | 10 | 18.807287 |
| hsa:5055( SERPINB2 , extracellular ) - 69.278180 -> hsa:5328( PLAU , extracellular ) - 32.655426 -> hsa:3082( HGF , extracellular ) - 3.247723 -> hsa:4233( MET , cytoplasm ) - 2.829073 -> hsa:5335( PLCG1 , cytoplasm ) - 12.338863<br>-> hsa:28964( GIT1 , cytoplasm ) - 19.664149 -> hsa:580( BARD1 , nucleus ) - 19.664149 -> hsa:672( BRCA1 , nucleus ) - 5.177529 -> hsa:1022( CDK7 , nucleus ) - 4.410487 -> hsa:7067( THRA , nucleus ) | 10 | 18.807287 |
| hsa:654( BMP6 , extracellular ) - 65.460916 -> hsa:658( BMPR1B , cytoplasm ) - 2.524005 -> hsa:9459( ARHGEF6 , cytoplasm ) - 29.522727 -> hsa:998( CDC42 , cytoplasm ) - 2.145471 -> hsa:5601( MAPK9 , cytoplasm ) - 3.032210 -> hsa:7597( ZNF46 , nucleus ) - 4.506367 -> hsa:7186( TRAF2 , cytoplasm ) - 24.033959 -> hsa:5886( RAD23A , nucleus )                                                                                            | 8  | 18.746522 |



|                                                                                                                                                                                                                                                                                                                                                                                                           |    |           |
|-----------------------------------------------------------------------------------------------------------------------------------------------------------------------------------------------------------------------------------------------------------------------------------------------------------------------------------------------------------------------------------------------------------|----|-----------|
| hsa:12(SERPINA3, extracellular) - 69.278180 -> hsa:4485(MST1, extracellular) - 3.247723 -> hsa:4486(MST1R, cytoplasm) - 2.829073 -> hsa:5335(PLCG1, cytoplasm) - 20.265953 -> hsa:58480(RHOU, cytoplasm) - 22.752059 -> hsa:5058(PAK1, cytoplasm) - 7.217161 -> hsa:5594(MAPK1, cytoplasm) - 5.390596 -> hsa:4286(MITF, nucleus)                                                                          | 8  | 18.711535 |
| hsa:12(SERPINA3, extracellular) - 69.278180 -> hsa:4485(MST1, extracellular) - 3.247723 -> hsa:4486(MST1R, cytoplasm) - 2.829073 -> hsa:5335(PLCG1, cytoplasm) - 20.265953 -> hsa:58480(RHOU, cytoplasm) - 22.752059 -> hsa:5058(PAK1, cytoplasm) - 7.217161 -> hsa:5594(MAPK1, cytoplasm) - 5.390596 -> hsa:3727(JUND, nucleus)                                                                          | 8  | 18.711535 |
| hsa:12(SERPINA3, extracellular) - 69.278180 -> hsa:4485(MST1, extracellular) - 3.247723 -> hsa:4486(MST1R, cytoplasm) - 2.829073 -> hsa:5335(PLCG1, cytoplasm) - 20.265953 -> hsa:58480(RHOU, cytoplasm) - 22.752059 -> hsa:5058(PAK1, cytoplasm) - 7.217161 -> hsa:1457(CSNK2A1, cytoplasm) - 5.390596 -> hsa:2353(FOS, nucleus)                                                                         | 8  | 18.711535 |
| hsa:12(SERPINA3, extracellular) - 69.278180 -> hsa:4485(MST1, extracellular) - 3.247723 -> hsa:4486(MST1R, cytoplasm) - 2.829073 -> hsa:5335(PLCG1, cytoplasm) - 20.265953 -> hsa:58480(RHOU, cytoplasm) - 22.752059 -> hsa:5058(PAK1, cytoplasm) - 7.217161 -> hsa:1459(CSNK2A2, cytoplasm) - 5.390596 -> hsa:466(ATF1, nucleus)                                                                         | 8  | 18.711535 |
| hsa:5054(SERPINE1, extracellular) - 69.278180 -> hsa:5328(PLAU, extracellular) - 32.655426 -> hsa:3082(HGF, extracellular) - 3.247723 -> hsa:4233(MET, cytoplasm) - 2.071011 -> hsa:6464(SHC1, cytoplasm) - 2.563870 -> hsa:5578(PRKCA, cytoplasm) - 2.205244 -> hsa:4772(NFATC1, nucleus)                                                                                                                | 7  | 18.670242 |
| hsa:5345(SERPINF2, extracellular) - 69.278180 -> hsa:5328(PLAU, extracellular) - 32.655426 -> hsa:3082(HGF, extracellular) - 3.247723 -> hsa:4233(MET, cytoplasm) - 2.071011 -> hsa:6464(SHC1, cytoplasm) - 2.563870 -> hsa:5578(PRKCA, cytoplasm) - 2.205244 -> hsa:4772(NFATC1, nucleus)                                                                                                                | 7  | 18.670242 |
| hsa:5269(SERPINB6, extracellular) - 69.278180 -> hsa:5328(PLAU, extracellular) - 32.655426 -> hsa:3082(HGF, extracellular) - 3.247723 -> hsa:4233(MET, cytoplasm) - 2.071011 -> hsa:6464(SHC1, cytoplasm) - 2.563870 -> hsa:5578(PRKCA, cytoplasm) - 2.205244 -> hsa:4772(NFATC1, nucleus)                                                                                                                | 7  | 18.670242 |
| hsa:5104(SERPINA5, extracellular) - 69.278180 -> hsa:5328(PLAU, extracellular) - 32.655426 -> hsa:3082(HGF, extracellular) - 3.247723 -> hsa:4233(MET, cytoplasm) - 2.071011 -> hsa:6464(SHC1, cytoplasm) - 2.563870 -> hsa:5578(PRKCA, cytoplasm) - 2.205244 -> hsa:4772(NFATC1, nucleus)                                                                                                                | 7  | 18.670242 |
| hsa:5055(SERPINB2, extracellular) - 69.278180 -> hsa:5328(PLAU, extracellular) - 32.655426 -> hsa:3082(HGF, extracellular) - 3.247723 -> hsa:4233(MET, cytoplasm) - 2.071011 -> hsa:6464(SHC1, cytoplasm) - 2.563870 -> hsa:5578(PRKCA, cytoplasm) - 2.205244 -> hsa:4772(NFATC1, nucleus)                                                                                                                | 7  | 18.670242 |
| hsa:12(SERPINA3, extracellular) - 69.278180 -> hsa:4485(MST1, extracellular) - 3.247723 -> hsa:4486(MST1R, cytoplasm) - 2.071011 -> hsa:6464(SHC1, cytoplasm) - 2.563870 -> hsa:5578(PRKCA, cytoplasm) - 16.171787 -> hsa:7157(TP53, nucleus)                                                                                                                                                             | 6  | 18.666514 |
| hsa:5054(SERPINE1, extracellular) - 69.278180 -> hsa:5328(PLAU, extracellular) - 32.655426 -> hsa:3082(HGF, extracellular) - 3.247723 -> hsa:4233(MET, cytoplasm) - 2.373007 -> hsa:7409(VAV1, cytoplasm) - 29.522727 -> hsa:5879(RAC1, golgi) - 15.788264 -> hsa:5062(PAK2, cytoplasm) - 7.217161 -> hsa:5595(MAPK3, nucleus) - 3.032210 -> hsa:6667(SP1, nucleus) - 4.506367 -> hsa:1958(EGR1, nucleus) | 10 | 18.624563 |
| hsa:5345(SERPINF2, extracellular) - 69.278180 -> hsa:5328(PLAU, extracellular) - 32.655426 -> hsa:3082(HGF, extracellular) - 3.247723 -> hsa:4233(MET, cytoplasm) - 2.373007 -> hsa:7409(VAV1, cytoplasm) - 29.522727 -> hsa:5879(RAC1, golgi) - 15.788264 -> hsa:5062(PAK2, cytoplasm) - 7.217161 -> hsa:5595(MAPK3, nucleus) - 3.032210 -> hsa:6667(SP1, nucleus) - 4.506367 -> hsa:1958(EGR1, nucleus) | 10 | 18.624563 |
| hsa:5269(SERPINB6, extracellular) - 69.278180 -> hsa:5328(PLAU, extracellular) - 32.655426 -> hsa:3082(HGF, extracellular) - 3.247723 -> hsa:4233(MET, cytoplasm) - 2.373007 -> hsa:7409(VAV1, cytoplasm) - 29.522727 -> hsa:5879(RAC1, golgi) - 15.788264 -> hsa:5062(PAK2, cytoplasm) - 7.217161 -> hsa:5595(MAPK3, nucleus) - 3.032210 -> hsa:6667(SP1, nucleus) - 4.506367 -> hsa:1958(EGR1, nucleus) | 10 | 18.624563 |
| hsa:5104(SERPINA5, extracellular) - 69.278180 -> hsa:5328(PLAU, extracellular) - 32.655426 -> hsa:3082(HGF, extracellular) - 3.247723 -> hsa:4233(MET, cytoplasm) - 2.373007 -> hsa:7409(VAV1, cytoplasm) - 29.522727                                                                                                                                                                                     | 10 | 18.624563 |

|                                                                                                                                                                                                                                                                                                                                                                                                                                                                                                                                    |    |           |
|------------------------------------------------------------------------------------------------------------------------------------------------------------------------------------------------------------------------------------------------------------------------------------------------------------------------------------------------------------------------------------------------------------------------------------------------------------------------------------------------------------------------------------|----|-----------|
| -> hsa:5879( RAC1 , golgi ) - 15.788264 -> hsa:5062( PAK2 , cytoplasm ) - 7.217161 -> hsa:5595( MAPK3 , nucleus )<br>- 3.032210 -> hsa:6667( SP1 , nucleus ) - 4.506367 -> hsa:1958( EGR1 , nucleus )                                                                                                                                                                                                                                                                                                                              |    |           |
| hsa:5055( SERPINB2 , extracellular ) - 69.278180 -> hsa:5328( PLAU , extracellular ) - 32.655426 -> hsa:3082( HGF , extracellular ) - 3.247723 -> hsa:4233( MET , cytoplasm ) - 2.373007 -> hsa:7409( VAV1 , cytoplasm ) - 29.522727<br>-> hsa:5879( RAC1 , golgi ) - 15.788264 -> hsa:5062( PAK2 , cytoplasm ) - 7.217161 -> hsa:5595( MAPK3 , nucleus )<br>- 3.032210 -> hsa:6667( SP1 , nucleus ) - 4.506367 -> hsa:1958( EGR1 , nucleus )                                                                                      | 10 | 18.624563 |
| hsa:2161( F12 , extracellular ) - 35.283898 -> hsa:3848( KRT1 , cytoplasm ) - 4.935545 -> hsa:7082( TJP1 , cytoplasm ) - 2.467773 -> hsa:5339( PLEC1 , cytoplasm ) - 10.282386 -> hsa:6709( SPTAN1 , cytoplasm ) - 4.935545 -> hsa:10006( ABI1 , cytoplasm ) - 5.546739 -> hsa:6654( SOS1 , cytoplasm ) - 37.788059 -> hsa:3265( HRAS , cytoplasm ) - 2.145471 -> hsa:3656( IRAK2 , cytoplasm ) - 23.645307 -> hsa:7189( TRAF6 , cytoplasm ) - 38.304122 -> hsa:867( CBL , cytoplasm ) - 39.484362 -> hsa:84959( STS-1 , nucleus ) | 12 | 18.619928 |
| hsa:12( SERPINA3 , extracellular ) - 69.278180 -> hsa:4485( MST1 , extracellular ) - 3.247723 -> hsa:4486( MST1R , cytoplasm ) - 2.829073 -> hsa:5335( PLCG1 , cytoplasm ) - 20.265953 -> hsa:58480( RHOU , cytoplasm ) - 22.752059<br>-> hsa:5058( PAK1 , cytoplasm ) - 7.217161 -> hsa:90( ACVR1 , cytoplasm ) - 4.410487 -> hsa:7068( THRB , nucleus )                                                                                                                                                                          | 8  | 18.571519 |
| hsa:12( SERPINA3 , extracellular ) - 69.278180 -> hsa:4485( MST1 , extracellular ) - 3.247723 -> hsa:4486( MST1R , cytoplasm ) - 2.829073 -> hsa:5335( PLCG1 , cytoplasm ) - 20.265953 -> hsa:58480( RHOU , cytoplasm ) - 22.752059<br>-> hsa:5058( PAK1 , cytoplasm ) - 7.217161 -> hsa:90( ACVR1 , cytoplasm ) - 4.410487 -> hsa:7421( VDR , nucleus )                                                                                                                                                                           | 8  | 18.571519 |
| hsa:12( SERPINA3 , extracellular ) - 69.278180 -> hsa:4485( MST1 , extracellular ) - 3.247723 -> hsa:4486( MST1R , cytoplasm ) - 2.829073 -> hsa:5335( PLCG1 , cytoplasm ) - 20.265953 -> hsa:58480( RHOU , cytoplasm ) - 22.752059<br>-> hsa:5058( PAK1 , cytoplasm ) - 7.217161 -> hsa:9641( IKBKE , cytoplasm ) - 4.410487 -> hsa:3187( HNRPH1 , nucleus )                                                                                                                                                                      | 8  | 18.571519 |
| hsa:12( SERPINA3 , extracellular ) - 69.278180 -> hsa:4485( MST1 , extracellular ) - 3.247723 -> hsa:4486( MST1R , cytoplasm ) - 2.829073 -> hsa:5335( PLCG1 , cytoplasm ) - 20.265953 -> hsa:58480( RHOU , cytoplasm ) - 22.752059<br>-> hsa:5058( PAK1 , cytoplasm ) - 7.217161 -> hsa:9641( IKBKE , cytoplasm ) - 4.410487 -> hsa:4670( HNRPM , nucleus )                                                                                                                                                                       | 8  | 18.571519 |
| hsa:12( SERPINA3 , extracellular ) - 69.278180 -> hsa:4485( MST1 , extracellular ) - 3.247723 -> hsa:4486( MST1R , cytoplasm ) - 2.829073 -> hsa:5335( PLCG1 , cytoplasm ) - 20.265953 -> hsa:58480( RHOU , cytoplasm ) - 22.752059<br>-> hsa:5058( PAK1 , cytoplasm ) - 7.217161 -> hsa:9641( IKBKE , cytoplasm ) - 4.410487 -> hsa:10642( IGF2BP1 , nucleus )                                                                                                                                                                    | 8  | 18.571519 |
| hsa:12( SERPINA3 , extracellular ) - 69.278180 -> hsa:4485( MST1 , extracellular ) - 3.247723 -> hsa:4486( MST1R , cytoplasm ) - 2.829073 -> hsa:5335( PLCG1 , cytoplasm ) - 20.265953 -> hsa:58480( RHOU , cytoplasm ) - 22.752059<br>-> hsa:5058( PAK1 , cytoplasm ) - 7.217161 -> hsa:984( CDC2L1 , cytoplasm ) - 4.410487 -> hsa:10921( RNFS1 , nucleus )                                                                                                                                                                      | 8  | 18.571519 |
| hsa:12( SERPINA3 , extracellular ) - 69.278180 -> hsa:4485( MST1 , extracellular ) - 3.247723 -> hsa:4486( MST1R , cytoplasm ) - 2.829073 -> hsa:5335( PLCG1 , cytoplasm ) - 20.265953 -> hsa:58480( RHOU , cytoplasm ) - 22.752059<br>-> hsa:5058( PAK1 , cytoplasm ) - 7.217161 -> hsa:9641( IKBKE , cytoplasm ) - 4.410487 -> hsa:6629( SNRPB2 , nucleus )                                                                                                                                                                      | 8  | 18.571519 |
| hsa:12( SERPINA3 , extracellular ) - 69.278180 -> hsa:4485( MST1 , extracellular ) - 3.247723 -> hsa:4486( MST1R , cytoplasm ) - 2.829073 -> hsa:5335( PLCG1 , cytoplasm ) - 20.265953 -> hsa:58480( RHOU , cytoplasm ) - 22.752059<br>-> hsa:5058( PAK1 , cytoplasm ) - 7.217161 -> hsa:9641( IKBKE , cytoplasm ) - 4.410487 -> hsa:6741( SSB , nucleus )                                                                                                                                                                         | 8  | 18.571519 |
| hsa:12( SERPINA3 , extracellular ) - 69.278180 -> hsa:4485( MST1 , extracellular ) - 3.247723 -> hsa:4486( MST1R , cytoplasm ) - 2.829073 -> hsa:5335( PLCG1 , cytoplasm ) - 20.265953 -> hsa:58480( RHOU , cytoplasm ) - 22.752059<br>-> hsa:5058( PAK1 , cytoplasm ) - 7.217161 -> hsa:9641( IKBKE , cytoplasm ) - 4.410487 -> hsa:9939( RBM8A , nucleus )                                                                                                                                                                       | 8  | 18.571519 |
| hsa:5054( SERPINE1 , extracellular ) - 69.278180 -> hsa:5328( PLAU , extracellular ) - 32.655426 -> hsa:3082( HGF , extracellular ) - 3.247723 -> hsa:4233( MET , cytoplasm ) - 2.829073 -> hsa:5335( PLCG1 , cytoplasm ) - 12.338863<br>-> hsa:28964( GIT1 , cytoplasm ) - 19.664149 -> hsa:580( BARD1 , nucleus ) - 19.664149 -> hsa:672( BRCA1 , nucleus )<br>- 5.177529 -> hsa:1017( CDK2 , cytoplasm ) - 2.205244 -> hsa:902( CCNH , nucleus )                                                                                | 10 | 18.56226  |
| hsa:5054( SERPINE1 , extracellular ) - 69.278180 -> hsa:5328( PLAU , extracellular ) - 32.655426 -> hsa:3082( HGF , extracellular ) - 3.247723 -> hsa:4233( MET , cytoplasm ) - 2.829073 -> hsa:5335( PLCG1 , cytoplasm ) - 12.338863                                                                                                                                                                                                                                                                                              | 10 | 18.56226  |



|                                                                                                                                                                                                                                                                                                                                                                                                                                                       |    |           |
|-------------------------------------------------------------------------------------------------------------------------------------------------------------------------------------------------------------------------------------------------------------------------------------------------------------------------------------------------------------------------------------------------------------------------------------------------------|----|-----------|
| -> hsa:28964( GIT1 , cytoplasm ) - 19.664149 -> hsa:580( BARD1 , nucleus ) - 19.664149 -> hsa:672( BRCA1 , nucleus )<br>- 5.177529 -> hsa:1017( CDK2 , cytoplasm ) - 2.205244 -> hsa:902( CCNH , nucleus )                                                                                                                                                                                                                                            |    |           |
| hsa:5055( SERPINB2 , extracellular ) - 69.278180 -> hsa:5328( PLAU , extracellular ) - 32.655426 -> hsa:3082( HGF , extracellular ) - 3.247723 -> hsa:4233( MET , cytoplasm ) - 2.829073 -> hsa:5335( PLCG1 , cytoplasm ) - 12.338863<br>-> hsa:28964( GIT1 , cytoplasm ) - 19.664149 -> hsa:580( BARD1 , nucleus ) - 19.664149 -> hsa:672( BRCA1 , nucleus )<br>- 5.177529 -> hsa:1017( CDK2 , cytoplasm ) - 2.205244 -> hsa:8812( CCNK , nucleus )  | 10 | 18.56226  |
| hsa:5055( SERPINB2 , extracellular ) - 69.278180 -> hsa:5328( PLAU , extracellular ) - 32.655426 -> hsa:3082( HGF , extracellular ) - 3.247723 -> hsa:4233( MET , cytoplasm ) - 2.829073 -> hsa:5335( PLCG1 , cytoplasm ) - 12.338863<br>-> hsa:28964( GIT1 , cytoplasm ) - 19.664149 -> hsa:580( BARD1 , nucleus ) - 19.664149 -> hsa:672( BRCA1 , nucleus )<br>- 5.177529 -> hsa:1017( CDK2 , cytoplasm ) - 2.205244 -> hsa:9134( CCNE2 , nucleus ) | 10 | 18.56226  |
| hsa:654( BMP6 , extracellular ) - 65.460916 -> hsa:658( BMPR1B , cytoplasm ) - 2.524005 -> hsa:9459( ARHGEF6 , cytoplasm ) - 12.338863 -> hsa:28964( GIT1 , cytoplasm ) - 19.664149 -> hsa:580( BARD1 , nucleus ) - 19.664149 -> hsa:672( BRCA1 , nucleus ) - 5.177529 -> hsa:4215( MAP3K3 , cytoplasm ) - 4.410487 -> hsa:9782( MATR3 , nucleus )                                                                                                    | 8  | 18.462871 |
| hsa:12( SERPINA3 , extracellular ) - 69.278180 -> hsa:4485( MST1 , extracellular ) - 3.247723 -> hsa:4486( MST1R , cytoplasm ) - 2.829073 -> hsa:5335( PLCG1 , cytoplasm ) - 20.265953 -> hsa:58480( RHOU , cytoplasm ) - 22.752059<br>-> hsa:5058( PAK1 , cytoplasm ) - 7.217161 -> hsa:9641( IKBKE , cytoplasm ) - 3.608580 -> hsa:2273( FHL1 , nucleus )                                                                                           | 8  | 18.456961 |
| hsa:12( SERPINA3 , extracellular ) - 69.278180 -> hsa:4485( MST1 , extracellular ) - 3.247723 -> hsa:4486( MST1R , cytoplasm ) - 2.829073 -> hsa:5335( PLCG1 , cytoplasm ) - 12.338863 -> hsa:28964( GIT1 , cytoplasm ) - 19.664149<br>-> hsa:580( BARD1 , nucleus ) - 2.288050 -> hsa:983( CDC2 , nucleus ) - 3.320395 -> hsa:7704( ZBTB16 , nucleus ) - 34.548817 -> hsa:27033( ZBTB32 , nucleus )                                                  | 9  | 18.439406 |
| hsa:12( SERPINA3 , extracellular ) - 69.278180 -> hsa:4485( MST1 , extracellular ) - 3.247723 -> hsa:4486( MST1R , cytoplasm ) - 2.829073 -> hsa:5335( PLCG1 , cytoplasm ) - 12.338863 -> hsa:28964( GIT1 , cytoplasm ) - 19.664149<br>-> hsa:580( BARD1 , nucleus ) - 2.288050 -> hsa:983( CDC2 , nucleus ) - 3.320395 -> hsa:7704( ZBTB16 , nucleus ) - 34.548817 -> hsa:7572( ZNF24 , nucleus )                                                    | 9  | 18.439406 |
| hsa:12( SERPINA3 , extracellular ) - 69.278180 -> hsa:4485( MST1 , extracellular ) - 3.247723 -> hsa:4486( MST1R , cytoplasm ) - 2.829073 -> hsa:5335( PLCG1 , cytoplasm ) - 20.265953 -> hsa:387( RHOA , cytoplasm ) - 12.711560 -> hsa:5585( PKN1 , cytoplasm ) - 2.205244 -> hsa:905( CCNT2 , nucleus )                                                                                                                                            | 7  | 18.422955 |
| hsa:12( SERPINA3 , extracellular ) - 69.278180 -> hsa:4485( MST1 , extracellular ) - 3.247723 -> hsa:4486( MST1R , cytoplasm ) - 2.829073 -> hsa:5335( PLCG1 , cytoplasm ) - 20.265953 -> hsa:58480( RHOU , cytoplasm ) - 22.752059<br>-> hsa:5058( PAK1 , cytoplasm ) - 7.217161 -> hsa:984( CDC2L1 , cytoplasm ) - 3.307866 -> hsa:896( CCND3 , nucleus )                                                                                           | 8  | 18.414002 |
| hsa:12( SERPINA3 , extracellular ) - 69.278180 -> hsa:4485( MST1 , extracellular ) - 3.247723 -> hsa:4486( MST1R , cytoplasm ) - 2.829073 -> hsa:5335( PLCG1 , cytoplasm ) - 20.265953 -> hsa:58480( RHOU , cytoplasm ) - 22.752059<br>-> hsa:5058( PAK1 , cytoplasm ) - 7.217161 -> hsa:1459( CSNK2A2 , cytoplasm ) - 3.032210 -> hsa:10661( KLF1 , nucleus )                                                                                        | 8  | 18.374623 |
| hsa:5054( SERPINE1 , extracellular ) - 69.278180 -> hsa:5328( PLAU , extracellular ) - 32.655426 -> hsa:3082( HGF , extracellular ) - 3.247723 -> hsa:4233( MET , cytoplasm ) - 2.373007 -> hsa:7409( VAV1 , cytoplasm ) - 29.522727<br>-> hsa:998( CDC42 , cytoplasm ) - 2.145471 -> hsa:5599( MAPK8 , cytoplasm ) - 2.071011 -> hsa:6774( STAT3 , nucleus ) - 5.627464 -> hsa:7707( ZNF148 , nucleus )                                              | 9  | 18.365126 |
| hsa:5345( SERPINF2 , extracellular ) - 69.278180 -> hsa:5328( PLAU , extracellular ) - 32.655426 -> hsa:3082( HGF , extracellular ) - 3.247723 -> hsa:4233( MET , cytoplasm ) - 2.373007 -> hsa:7409( VAV1 , cytoplasm ) - 29.522727<br>-> hsa:998( CDC42 , cytoplasm ) - 2.145471 -> hsa:5599( MAPK8 , cytoplasm ) - 2.071011 -> hsa:6774( STAT3 , nucleus ) - 5.627464 -> hsa:7707( ZNF148 , nucleus )                                              | 9  | 18.365126 |
| hsa:5269( SERPINB6 , extracellular ) - 69.278180 -> hsa:5328( PLAU , extracellular ) - 32.655426 -> hsa:3082( HGF , extracellular ) - 3.247723 -> hsa:4233( MET , cytoplasm ) - 2.373007 -> hsa:7409( VAV1 , cytoplasm ) - 29.522727<br>-> hsa:998( CDC42 , cytoplasm ) - 2.145471 -> hsa:5599( MAPK8 , cytoplasm ) - 2.071011 -> hsa:6774( STAT3 , nucleus )                                                                                         | 9  | 18.365126 |

|                                                                                                                                                                                                                                                                                                                                                             |    |           |
|-------------------------------------------------------------------------------------------------------------------------------------------------------------------------------------------------------------------------------------------------------------------------------------------------------------------------------------------------------------|----|-----------|
| - 5.627464 -> hsa:7707( ZNF148 , nucleus )                                                                                                                                                                                                                                                                                                                  |    |           |
| hsa:5104( SERPINA5 , extracellular ) - 69.278180 -> hsa:5328( PLAU , extracellular ) - 32.655426 -> hsa:3082( HGF , extracellular ) - 3.247723 -> hsa:4233( MET , cytoplasm ) - 2.373007 -> hsa:7409( VAV1 , cytoplasm ) - 29.522727 -> hsa:998( CDC42 , cytoplasm ) - 2.145471 -> hsa:5599( MAPK8 , cytoplasm ) - 2.071011 -> hsa:6774( STAT3 , nucleus )  | 9  | 18.365126 |
| - 5.627464 -> hsa:7707( ZNF148 , nucleus )                                                                                                                                                                                                                                                                                                                  |    |           |
| hsa:5055( SERPINB2 , extracellular ) - 69.278180 -> hsa:5328( PLAU , extracellular ) - 32.655426 -> hsa:3082( HGF , extracellular ) - 3.247723 -> hsa:4233( MET , cytoplasm ) - 2.373007 -> hsa:7409( VAV1 , cytoplasm ) - 29.522727 -> hsa:998( CDC42 , cytoplasm ) - 2.145471 -> hsa:5599( MAPK8 , cytoplasm ) - 2.071011 -> hsa:6774( STAT3 , nucleus )  | 9  | 18.365126 |
| - 5.627464 -> hsa:7707( ZNF148 , nucleus )                                                                                                                                                                                                                                                                                                                  |    |           |
| hsa:654( BMP6 , extracellular ) - 65.460916 -> hsa:658( BMPR1B , cytoplasm ) - 2.524005 -> hsa:9459( ARHGEF6 , cytoplasm ) - 12.338863 -> hsa:28964( GIT1 , cytoplasm ) - 19.664149 -> hsa:580( BARD1 , nucleus ) - 19.664149 -> hsa:672( BRCA1 , nucleus ) - 5.177529 -> hsa:1022( CDK7 , nucleus ) - 3.608580 -> hsa:2966( GTF2H2 , nucleus )             | 8  | 18.348313 |
| hsa:12( SERPINA3 , extracellular ) - 69.278180 -> hsa:4485( MST1 , extracellular ) - 3.247723 -> hsa:4486( MST1R , cytoplasm ) - 2.829073 -> hsa:5335( PLCG1 , cytoplasm ) - 20.265953 -> hsa:58480( RHOU , cytoplasm ) - 22.752059 -> hsa:5058( PAK1 , cytoplasm ) - 7.217161 -> hsa:5594( MAPK1 , cytoplasm ) - 2.520278 -> hsa:8202( NCOA3 , nucleus )   | 8  | 18.30149  |
| hsa:12( SERPINA3 , extracellular ) - 69.278180 -> hsa:4485( MST1 , extracellular ) - 3.247723 -> hsa:4486( MST1R , cytoplasm ) - 2.829073 -> hsa:5335( PLCG1 , cytoplasm ) - 20.265953 -> hsa:58480( RHOU , cytoplasm ) - 22.752059 -> hsa:5058( PAK1 , cytoplasm ) - 7.217161 -> hsa:5594( MAPK1 , cytoplasm ) - 2.520278 -> hsa:8648( NCOA1 , nucleus )   | 8  | 18.30149  |
| hsa:654( BMP6 , extracellular ) - 65.460916 -> hsa:658( BMPR1B , cytoplasm ) - 2.524005 -> hsa:9459( ARHGEF6 , cytoplasm ) - 29.522727 -> hsa:998( CDC42 , cytoplasm ) - 15.788264 -> hsa:5062( PAK2 , cytoplasm ) - 7.217161 -> hsa:5594( MAPK1 , cytoplasm ) - 3.032210 -> hsa:6667( SP1 , nucleus ) - 4.506367 -> hsa:1958( EGR1 , nucleus )             | 8  | 18.293093 |
| hsa:12( SERPINA3 , extracellular ) - 69.278180 -> hsa:4485( MST1 , extracellular ) - 3.247723 -> hsa:4486( MST1R , cytoplasm ) - 2.071011 -> hsa:5295( PIK3R1 , cytoplasm ) - 12.016980 -> hsa:392( ARHGAP1 , cytoplasm ) - 33.843739 -> hsa:998( CDC42 , cytoplasm ) - 2.145471 -> hsa:5599( MAPK8 , cytoplasm ) - 5.390596 -> hsa:3725( JUN , nucleus )   | 8  | 18.284814 |
| hsa:12( SERPINA3 , extracellular ) - 69.278180 -> hsa:4485( MST1 , extracellular ) - 3.247723 -> hsa:4486( MST1R , cytoplasm ) - 2.829073 -> hsa:5335( PLCG1 , cytoplasm ) - 20.265953 -> hsa:58480( RHOU , cytoplasm ) - 22.752059 -> hsa:5058( PAK1 , cytoplasm ) - 7.217161 -> hsa:7048( TGFBR2 , cytoplasm ) - 2.205244 -> hsa:891( CCNB1 , nucleus )   | 8  | 18.256485 |
| hsa:12( SERPINA3 , extracellular ) - 69.278180 -> hsa:4485( MST1 , extracellular ) - 3.247723 -> hsa:4486( MST1R , cytoplasm ) - 2.829073 -> hsa:5335( PLCG1 , cytoplasm ) - 20.265953 -> hsa:58480( RHOU , cytoplasm ) - 22.752059 -> hsa:5058( PAK1 , cytoplasm ) - 7.217161 -> hsa:1020( CDK5 , cytoplasm ) - 2.205244 -> hsa:91768( CABLES1 , nucleus ) | 8  | 18.256485 |
| hsa:12( SERPINA3 , extracellular ) - 69.278180 -> hsa:4485( MST1 , extracellular ) - 3.247723 -> hsa:4486( MST1R , cytoplasm ) - 2.829073 -> hsa:5335( PLCG1 , cytoplasm ) - 20.265953 -> hsa:58480( RHOU , cytoplasm ) - 22.752059 -> hsa:5058( PAK1 , cytoplasm ) - 7.217161 -> hsa:1020( CDK5 , cytoplasm ) - 2.205244 -> hsa:900( CCNG1 , nucleus )     | 8  | 18.256485 |
| hsa:12( SERPINA3 , extracellular ) - 69.278180 -> hsa:4485( MST1 , extracellular ) - 3.247723 -> hsa:4486( MST1R , cytoplasm ) - 2.829073 -> hsa:5335( PLCG1 , cytoplasm ) - 20.265953 -> hsa:58480( RHOU , cytoplasm ) - 22.752059 -> hsa:5058( PAK1 , cytoplasm ) - 7.217161 -> hsa:984( CDC2L1 , cytoplasm ) - 2.205244 -> hsa:81669( CCNL2 , nucleus )  | 8  | 18.256485 |
| hsa:654( BMP6 , extracellular ) - 65.460916 -> hsa:658( BMPR1B , cytoplasm ) - 2.524005 -> hsa:9459( ARHGEF6 , cytoplasm ) - 12.338863 -> hsa:28964( GIT1 , cytoplasm ) - 19.664149 -> hsa:580( BARD1 , nucleus ) - 19.664149 -> hsa:672( BRCA1 , nucleus ) - 5.177529 -> hsa:1017( CDK2 , cytoplasm ) - 2.940325 -> hsa:894( CCND2 , nucleus )             | 8  | 18.252848 |
| hsa:5054( SERPINE1 , extracellular ) - 69.278180 -> hsa:5328( PLAU , extracellular ) - 32.655426 -> hsa:3082( HGF , extracellular ) - 3.247723 -> hsa:4233( MET , cytoplasm ) - 2.071011 -> hsa:3635( INPP5D646743 , cytoplasm ) - 7.622199                                                                                                                 | 10 | 18.223159 |

|                                                                                                                                                                                                                                                                                                                                                                                                                                                           |    |           |
|-----------------------------------------------------------------------------------------------------------------------------------------------------------------------------------------------------------------------------------------------------------------------------------------------------------------------------------------------------------------------------------------------------------------------------------------------------------|----|-----------|
| -> hsa:9046( DOK2 , cytoplasm ) - 3.230539 -> hsa:5716( PSMD10 , cytoplasm ) - 19.664149 -> hsa:4193( MDM2 , nucleus )<br>- 24.033959 -> hsa:56893( UBQLN4 , nucleus ) - 2.205244 -> hsa:28951( TRIB2 , nucleus )                                                                                                                                                                                                                                         |    |           |
| hsa:12( SERPINA3 , extracellular ) - 69.278180 -> hsa:4485( MST1 , extracellular ) - 3.247723 -> hsa:4486( MST1R , cytoplasm ) - 2.071011 -> hsa:6464( SHC1 , cytoplasm ) - 8.230247 -> hsa:6654( SOS1 , cytoplasm ) - 37.788059 -> hsa:3265( HRAS , cytoplasm ) - 2.145471 -> hsa:3643( INSR , endoplasmic reticulum ) - 4.410487 -> hsa:10492( SYNCRIP , nucleus )                                                                                      | 8  | 18.167311 |
| hsa:654( BMP6 , extracellular ) - 65.460916 -> hsa:658( BMPR1B , cytoplasm ) - 2.524005 -> hsa:9459( ARHGEF6 , cytoplasm ) - 12.338863 -> hsa:28964( GIT1 , cytoplasm ) - 19.664149 -> hsa:580( BARD1 , nucleus ) - 19.664149 -> hsa:672( BRCA1 , nucleus ) - 5.177529 -> hsa:1019( CDK4 , cytoplasm ) - 2.205244 -> hsa:595( CCND1 , nucleus )                                                                                                           | 8  | 18.147836 |
| hsa:654( BMP6 , extracellular ) - 65.460916 -> hsa:658( BMPR1B , cytoplasm ) - 2.524005 -> hsa:9459( ARHGEF6 , cytoplasm ) - 12.338863 -> hsa:28964( GIT1 , cytoplasm ) - 19.664149 -> hsa:580( BARD1 , nucleus ) - 19.664149 -> hsa:672( BRCA1 , nucleus ) - 5.177529 -> hsa:1022( CDK7 , nucleus ) - 2.205244 -> hsa:902( CCNH , nucleus )                                                                                                              | 8  | 18.147836 |
| hsa:654( BMP6 , extracellular ) - 65.460916 -> hsa:658( BMPR1B , cytoplasm ) - 2.524005 -> hsa:9459( ARHGEF6 , cytoplasm ) - 12.338863 -> hsa:28964( GIT1 , cytoplasm ) - 19.664149 -> hsa:580( BARD1 , nucleus ) - 19.664149 -> hsa:672( BRCA1 , nucleus ) - 5.177529 -> hsa:1017( CDK2 , cytoplasm ) - 2.205244 -> hsa:9134( CCNE2 , nucleus )                                                                                                          | 8  | 18.147836 |
| hsa:654( BMP6 , extracellular ) - 65.460916 -> hsa:658( BMPR1B , cytoplasm ) - 2.524005 -> hsa:9459( ARHGEF6 , cytoplasm ) - 12.338863 -> hsa:28964( GIT1 , cytoplasm ) - 19.664149 -> hsa:580( BARD1 , nucleus ) - 19.664149 -> hsa:672( BRCA1 , nucleus ) - 5.177529 -> hsa:1017( CDK2 , cytoplasm ) - 2.205244 -> hsa:85417( CCNB3 , nucleus )                                                                                                         | 8  | 18.147836 |
| hsa:12( SERPINA3 , extracellular ) - 69.278180 -> hsa:4485( MST1 , extracellular ) - 3.247723 -> hsa:4486( MST1R , cytoplasm ) - 2.071011 -> hsa:5295( PIK3R1 , cytoplasm ) - 12.016980 -> hsa:392( ARHGAP1 , cytoplasm ) - 33.843739 -> hsa:998( CDC42 , cytoplasm ) - 2.145471 -> hsa:5590( PRKCZ , cytoplasm ) - 4.410487 -> hsa:4691( NCL , nucleus )                                                                                                 | 8  | 18.144799 |
| hsa:3625( INHBB , extracellular ) - 65.460916 -> hsa:90( ACVR1 , cytoplasm ) - 8.820974 -> hsa:3551( IKKKB , cytoplasm ) - 2.619811 -> hsa:55620( STAP2 , cytoplasm ) - 8.141027 -> hsa:6774( STAT3 , nucleus ) - 5.627464 -> hsa:7707( ZNF148 , nucleus )                                                                                                                                                                                                | 6  | 18.134038 |
| hsa:3626( INHBC , extracellular ) - 65.460916 -> hsa:90( ACVR1 , cytoplasm ) - 8.820974 -> hsa:3551( IKKKB , cytoplasm ) - 2.619811 -> hsa:55620( STAP2 , cytoplasm ) - 8.141027 -> hsa:6774( STAT3 , nucleus ) - 5.627464 -> hsa:7707( ZNF148 , nucleus )                                                                                                                                                                                                | 6  | 18.134038 |
| hsa:12( SERPINA3 , extracellular ) - 69.278180 -> hsa:4485( MST1 , extracellular ) - 3.247723 -> hsa:4486( MST1R , cytoplasm ) - 2.071011 -> hsa:5295( PIK3R1 , cytoplasm ) - 12.016980 -> hsa:392( ARHGAP1 , cytoplasm ) - 33.843739 -> hsa:998( CDC42 , cytoplasm ) - 2.145471 -> hsa:5599( MAPK8 , cytoplasm ) - 4.211403 -> hsa:1386( ATF2 , nucleus )                                                                                                | 8  | 18.116358 |
| hsa:12( SERPINA3 , extracellular ) - 69.278180 -> hsa:4485( MST1 , extracellular ) - 3.247723 -> hsa:4486( MST1R , cytoplasm ) - 2.071011 -> hsa:5335( PLCG1 , cytoplasm ) - 20.265953 -> hsa:58480( RHOU , cytoplasm ) - 22.752059 -> hsa:5058( PAK1 , cytoplasm ) - 3.913667 -> hsa:207( AKT1 , cytoplasm ) - 4.410487 -> hsa:1027( CDKN1B , nucleus )                                                                                                  | 8  | 18.099592 |
| hsa:5054( SERPINE1 , extracellular ) - 69.278180 -> hsa:5328( PLAU , extracellular ) - 32.655426 -> hsa:3082( HGF , extracellular ) - 3.247723 -> hsa:4233( MET , cytoplasm ) - 2.071011 -> hsa:3635( INPP5D646743 , cytoplasm ) - 3.776765 -> hsa:2885( GRB2 , cytoplasm ) - 10.944035 -> hsa:4952( OCRL , cytoplasm ) - 33.843739 -> hsa:998( CDC42 , cytoplasm ) - 2.145471 -> hsa:5601( MAPK9 , cytoplasm ) - 4.211403 -> hsa:11016( ATF7 , nucleus ) | 10 | 18.019306 |
| hsa:5345( SERPINF2 , extracellular ) - 69.278180 -> hsa:5328( PLAU , extracellular ) - 32.655426 -> hsa:3082( HGF , extracellular ) - 3.247723 -> hsa:4233( MET , cytoplasm ) - 2.071011 -> hsa:3635( INPP5D646743 , cytoplasm ) - 3.776765 -> hsa:2885( GRB2 , cytoplasm ) - 10.944035 -> hsa:4952( OCRL , cytoplasm ) - 33.843739 -> hsa:998( CDC42 , cytoplasm ) - 2.145471 -> hsa:5601( MAPK9 , cytoplasm ) - 4.211403 -> hsa:11016( ATF7 , nucleus ) | 10 | 18.019306 |
| hsa:5269( SERPINB6 , extracellular ) - 69.278180 -> hsa:5328( PLAU , extracellular ) - 32.655426 -> hsa:3082( HGF , extracellular ) - 3.247723 -> hsa:4233( MET , cytoplasm ) - 2.071011 -> hsa:3635( INPP5D646743 , cytoplasm ) - 3.776765 -> hsa:2885( GRB2 , cytoplasm ) - 10.944035 -> hsa:4952( OCRL , cytoplasm ) - 33.843739 -> hsa:998( CDC42 , cytoplasm )                                                                                       | 10 | 18.019306 |

|                                                                                                                                                                                                                                                                                                                                                                                                        |    |           |
|--------------------------------------------------------------------------------------------------------------------------------------------------------------------------------------------------------------------------------------------------------------------------------------------------------------------------------------------------------------------------------------------------------|----|-----------|
| - 2.145471 -> hsa:5601( MAPK9 , cytoplasm ) - 4.211403 -> hsa:11016( ATF7 , nucleus )                                                                                                                                                                                                                                                                                                                  |    |           |
| hsa:5104( SERPINA5 , extracellular ) - 69.278180 -> hsa:5328( PLAU , extracellular ) - 32.655426 -> hsa:3082( HGF , extracellular ) - 3.247723 -> hsa:4233( MET , cytoplasm ) - 2.071011 -> hsa:3635( INPP5D646743 , cytoplasm ) - 3.776765 -> hsa:2885( GRB2 , cytoplasm ) - 10.944035 -> hsa:4952( OCRL , cytoplasm ) - 33.843739 -> hsa:998( CDC42 , cytoplasm )                                    | 10 | 18.019306 |
| - 2.145471 -> hsa:5601( MAPK9 , cytoplasm ) - 4.211403 -> hsa:11016( ATF7 , nucleus )                                                                                                                                                                                                                                                                                                                  |    |           |
| hsa:5055( SERPINB2 , extracellular ) - 69.278180 -> hsa:5328( PLAU , extracellular ) - 32.655426 -> hsa:3082( HGF , extracellular ) - 3.247723 -> hsa:4233( MET , cytoplasm ) - 2.071011 -> hsa:3635( INPP5D646743 , cytoplasm ) - 3.776765 -> hsa:2885( GRB2 , cytoplasm ) - 10.944035 -> hsa:4952( OCRL , cytoplasm ) - 33.843739 -> hsa:998( CDC42 , cytoplasm )                                    | 10 | 18.019306 |
| - 2.145471 -> hsa:5601( MAPK9 , cytoplasm ) - 4.211403 -> hsa:11016( ATF7 , nucleus )                                                                                                                                                                                                                                                                                                                  |    |           |
| hsa:12( SERPINA3 , extracellular ) - 69.278180 -> hsa:4485( MST1 , extracellular ) - 3.247723 -> hsa:4486( MST1R , cytoplasm ) - 2.829073 -> hsa:5335( PLCG1 , cytoplasm ) - 12.338863 -> hsa:28964( GIT1 , cytoplasm ) - 19.664149 -> hsa:580( BARD1 , nucleus ) - 2.288050 -> hsa:983( CDC2 , nucleus ) - 16.171787 -> hsa:7161( TP73 , nucleus )                                                    | 8  | 17.973975 |
| hsa:12( SERPINA3 , extracellular ) - 69.278180 -> hsa:4485( MST1 , extracellular ) - 3.247723 -> hsa:4486( MST1R , cytoplasm ) - 2.829073 -> hsa:5335( PLCG1 , cytoplasm ) - 20.265953 -> hsa:58480( RHOU , cytoplasm ) - 22.752059 -> hsa:5058( PAK1 , cytoplasm ) - 2.738090 -> hsa:5580( PRKCD , cytoplasm ) - 4.410487 -> hsa:5465( PPARA , nucleus )                                              | 8  | 17.931652 |
| hsa:12( SERPINA3 , extracellular ) - 69.278180 -> hsa:4485( MST1 , extracellular ) - 3.247723 -> hsa:4486( MST1R , cytoplasm ) - 2.071011 -> hsa:6464( SHC1 , cytoplasm ) - 2.563870 -> hsa:5578( PRKCA , cytoplasm ) - 4.410487 -> hsa:2130( EWSR1 , nucleus ) - 18.025470 -> hsa:580( BARD1 , nucleus ) - 19.664149 -> hsa:672( BRCA1 , nucleus ) - 24.033959 -> hsa:5887( RAD23B , nucleus )        | 9  | 17.911856 |
| hsa:5054( SERPINE1 , extracellular ) - 69.278180 -> hsa:5328( PLAU , extracellular ) - 32.655426 -> hsa:3082( HGF , extracellular ) - 3.247723 -> hsa:4233( MET , cytoplasm ) - 2.071011 -> hsa:5295( PIK3R1 , cytoplasm ) - 3.776765 -> hsa:10451( VAV3 , cytoplasm ) - 17.324771 -> hsa:387( RHOA , cytoplasm ) - 12.711560 -> hsa:5585( PKN1 , cytoplasm ) - 2.205244 -> hsa:905( CCNT2 , nucleus ) | 9  | 17.908835 |
| hsa:5345( SERPINF2 , extracellular ) - 69.278180 -> hsa:5328( PLAU , extracellular ) - 32.655426 -> hsa:3082( HGF , extracellular ) - 3.247723 -> hsa:4233( MET , cytoplasm ) - 2.071011 -> hsa:5295( PIK3R1 , cytoplasm ) - 3.776765 -> hsa:10451( VAV3 , cytoplasm ) - 17.324771 -> hsa:387( RHOA , cytoplasm ) - 12.711560 -> hsa:5585( PKN1 , cytoplasm ) - 2.205244 -> hsa:905( CCNT2 , nucleus ) | 9  | 17.908835 |
| hsa:5269( SERPINB6 , extracellular ) - 69.278180 -> hsa:5328( PLAU , extracellular ) - 32.655426 -> hsa:3082( HGF , extracellular ) - 3.247723 -> hsa:4233( MET , cytoplasm ) - 2.071011 -> hsa:5295( PIK3R1 , cytoplasm ) - 3.776765 -> hsa:10451( VAV3 , cytoplasm ) - 17.324771 -> hsa:387( RHOA , cytoplasm ) - 12.711560 -> hsa:5585( PKN1 , cytoplasm ) - 2.205244 -> hsa:905( CCNT2 , nucleus ) | 9  | 17.908835 |
| hsa:5104( SERPINA5 , extracellular ) - 69.278180 -> hsa:5328( PLAU , extracellular ) - 32.655426 -> hsa:3082( HGF , extracellular ) - 3.247723 -> hsa:4233( MET , cytoplasm ) - 2.071011 -> hsa:5295( PIK3R1 , cytoplasm ) - 3.776765 -> hsa:10451( VAV3 , cytoplasm ) - 17.324771 -> hsa:387( RHOA , cytoplasm ) - 12.711560 -> hsa:5585( PKN1 , cytoplasm ) - 2.205244 -> hsa:905( CCNT2 , nucleus ) | 9  | 17.908835 |
| hsa:5055( SERPINB2 , extracellular ) - 69.278180 -> hsa:5328( PLAU , extracellular ) - 32.655426 -> hsa:3082( HGF , extracellular ) - 3.247723 -> hsa:4233( MET , cytoplasm ) - 2.071011 -> hsa:5295( PIK3R1 , cytoplasm ) - 3.776765 -> hsa:10451( VAV3 , cytoplasm ) - 17.324771 -> hsa:387( RHOA , cytoplasm ) - 12.711560 -> hsa:5585( PKN1 , cytoplasm ) - 2.205244 -> hsa:905( CCNT2 , nucleus ) | 9  | 17.908835 |
| hsa:654( BMP6 , extracellular ) - 65.460916 -> hsa:658( BMPR1B , cytoplasm ) - 2.524005 -> hsa:9459( ARHGFEF6 , cytoplasm ) - 29.522727 -> hsa:998( CDC42 , cytoplasm ) - 2.145471 -> hsa:5599( MAPK8 , cytoplasm ) - 2.071011 -> hsa:6774( STAT3 , nucleus ) - 5.627464 -> hsa:7707( ZNF148 , nucleus )                                                                                               | 7  | 17.891932 |
| hsa:12( SERPINA3 , extracellular ) - 69.278180 -> hsa:4485( MST1 , extracellular ) - 3.247723 -> hsa:4486( MST1R , cytoplasm ) - 2.071011 -> hsa:3717( JAK2 , cytoplasm ) - 9.046826 -> hsa:6774( STAT3 , nucleus ) - 5.627464 ->                                                                                                                                                                      | 6  | 17.854241 |

|                                                                                                                                                                                                                                                                                                                                                                                                                                                                                                                                                                              |    |           |
|------------------------------------------------------------------------------------------------------------------------------------------------------------------------------------------------------------------------------------------------------------------------------------------------------------------------------------------------------------------------------------------------------------------------------------------------------------------------------------------------------------------------------------------------------------------------------|----|-----------|
| hsa:7707( ZNF148 , nucleus )                                                                                                                                                                                                                                                                                                                                                                                                                                                                                                                                                 |    |           |
| hsa:12( SERPINA3 , extracellular ) - 69.278180 -> hsa:4485( MST1 , extracellular ) - 3.247723 -> hsa:4486( MST1R , cytoplasm ) - 2.071011 -> hsa:5295( PIK3R1 , cytoplasm ) - 12.016980 -> hsa:392( ARHGAP1 , cytoplasm ) - 33.843739 -> hsa:998( CDC42 , cytoplasm ) - 2.145471 -> hsa:5590( PRKCZ , cytoplasm ) - 2.205244 -> hsa:5970( RELA , nucleus )                                                                                                                                                                                                                   | 8  | 17.829764 |
| hsa:12( SERPINA3 , extracellular ) - 69.278180 -> hsa:4485( MST1 , extracellular ) - 3.247723 -> hsa:4486( MST1R , cytoplasm ) - 2.071011 -> hsa:5295( PIK3R1 , cytoplasm ) - 12.016980 -> hsa:392( ARHGAP1 , cytoplasm ) - 33.843739 -> hsa:998( CDC42 , cytoplasm ) - 2.145471 -> hsa:5599( MAPK8 , cytoplasm ) - 2.205244 -> hsa:5966( REL , nucleus )                                                                                                                                                                                                                    | 8  | 17.829764 |
| hsa:12( SERPINA3 , extracellular ) - 69.278180 -> hsa:4485( MST1 , extracellular ) - 3.247723 -> hsa:4486( MST1R , cytoplasm ) - 2.071011 -> hsa:5295( PIK3R1 , cytoplasm ) - 12.016980 -> hsa:392( ARHGAP1 , cytoplasm ) - 33.843739 -> hsa:387( RHOA , cytoplasm ) - 2.145471 -> hsa:5566( PRKACA730418 , cytoplasm ) - 2.205244 -> hsa:595( CCND1 , nucleus )                                                                                                                                                                                                             | 8  | 17.829764 |
| hsa:12( SERPINA3 , extracellular ) - 69.278180 -> hsa:4485( MST1 , extracellular ) - 3.247723 -> hsa:4486( MST1R , cytoplasm ) - 2.071011 -> hsa:5295( PIK3R1 , cytoplasm ) - 12.016980 -> hsa:392( ARHGAP1 , cytoplasm ) - 33.843739 -> hsa:998( CDC42 , cytoplasm ) - 2.145471 -> hsa:5601( MAPK9 , cytoplasm ) - 2.205244 -> hsa:4775( NFATC3 , nucleus )                                                                                                                                                                                                                 | 8  | 17.829764 |
| hsa:12( SERPINA3 , extracellular ) - 69.278180 -> hsa:4485( MST1 , extracellular ) - 3.247723 -> hsa:4486( MST1R , cytoplasm ) - 2.829073 -> hsa:5335( PLCG1 , cytoplasm ) - 20.265953 -> hsa:387( RHOA , cytoplasm ) - 2.145471 -> hsa:7046( TGFBR1 , cytoplasm ) - 8.820974 -> hsa:7314( UBB , nucleus )                                                                                                                                                                                                                                                                   | 7  | 17.764562 |
| hsa:12( SERPINA3 , extracellular ) - 69.278180 -> hsa:4485( MST1 , extracellular ) - 3.247723 -> hsa:4486( MST1R , cytoplasm ) - 2.829073 -> hsa:5335( PLCG1 , cytoplasm ) - 20.265953 -> hsa:387( RHOA , cytoplasm ) - 2.145471 -> hsa:7046( TGFBR1 , cytoplasm ) - 8.820974 -> hsa:7311( UBA52 , nucleus )                                                                                                                                                                                                                                                                 | 7  | 17.764562 |
| hsa:654( BMP6 , extracellular ) - 65.460916 -> hsa:658( BMPR1B , cytoplasm ) - 2.071011 -> hsa:9306( SOCS6 , cytoplasm ) - 7.896873 -> hsa:5296( PIK3R2 , cytoplasm ) - 6.441242 -> hsa:6654( SOS1 , cytoplasm ) - 37.788059 -> hsa:3265( HRAS , cytoplasm ) - 2.145471 -> hsa:5590( PRKCZ , cytoplasm ) - 2.205244 -> hsa:4773( NFATC2 , nucleus )                                                                                                                                                                                                                          | 8  | 17.715545 |
| hsa:12( SERPINA3 , extracellular ) - 69.278180 -> hsa:4485( MST1 , extracellular ) - 3.247723 -> hsa:4486( MST1R , cytoplasm ) - 2.071011 -> hsa:6464( SHC1 , cytoplasm ) - 3.090081 -> hsa:5921( RASA1 , cytoplasm ) - 18.854384 -> hsa:5906( RAPIA , cytoplasm ) - 22.582651 -> hsa:5894( RAF1 , cytoplasm ) - 4.410487 -> hsa:367( AR , nucleus )                                                                                                                                                                                                                         | 8  | 17.647788 |
| hsa:12( SERPINA3 , extracellular ) - 69.278180 -> hsa:4485( MST1 , extracellular ) - 3.247723 -> hsa:4486( MST1R , cytoplasm ) - 2.071011 -> hsa:3717( JAK2 , cytoplasm ) - 4.010276 -> hsa:7409( VAV1 , cytoplasm ) - 29.522727 -> hsa:3265( HRAS , cytoplasm ) - 2.145471 -> hsa:5599( MAPK8 , cytoplasm ) - 13.231462 -> hsa:5591( PRKDC , nucleus )                                                                                                                                                                                                                      | 8  | 17.643836 |
| hsa:2161( F12 , extracellular ) - 35.283898 -> hsa:3848( KRT1 , cytoplasm ) - 4.935545 -> hsa:7082( TJP1 , cytoplasm ) - 2.467773 -> hsa:5339( PLECL1 , cytoplasm ) - 10.282386 -> hsa:6709( SPTAN1 , cytoplasm ) - 4.935545 -> hsa:10006( ABI1 , cytoplasm ) - 5.546739 -> hsa:6654( SOS1 , cytoplasm ) - 37.788059 -> hsa:3265( HRAS , cytoplasm ) - 2.145471 -> hsa:3656( IRAK2 , cytoplasm ) - 23.645307 -> hsa:7189( TRAF6 , cytoplasm ) - 38.304122 -> hsa:867( CBL , cytoplasm ) - 35.124889 -> hsa:6714( SRC , cytoplasm ) - 9.195643 -> hsa:2909( GRLF1 , nucleus ) | 13 | 17.471281 |
| hsa:654( BMP6 , extracellular ) - 65.460916 -> hsa:658( BMPR1B , cytoplasm ) - 2.524005 -> hsa:9459( ARHGEF6 , cytoplasm ) - 12.338863 -> hsa:28964( GIT1 , cytoplasm ) - 19.664149 -> hsa:580( BARD1 , nucleus ) - 2.288050 -> hsa:983( CDC2 , nucleus ) - 2.205244 -> hsa:8900( CCNA1 , nucleus )                                                                                                                                                                                                                                                                          | 7  | 17.413538 |
| hsa:654( BMP6 , extracellular ) - 65.460916 -> hsa:658( BMPR1B , cytoplasm ) - 2.524005 -> hsa:9459( ARHGEF6 , cytoplasm ) - 12.338863 -> hsa:28964( GIT1 , cytoplasm ) - 19.664149 -> hsa:580( BARD1 , nucleus ) - 2.288050 -> hsa:983( CDC2 , nucleus ) - 2.205244 -> hsa:898( CCNE1 , nucleus )                                                                                                                                                                                                                                                                           | 7  | 17.413538 |
| hsa:654( BMP6 , extracellular ) - 65.460916 -> hsa:658( BMPR1B , cytoplasm ) - 2.524005 -> hsa:9459( ARHGEF6 , cytoplasm ) - 12.338863 -> hsa:28964( GIT1 , cytoplasm ) - 19.664149 -> hsa:580( BARD1 , nucleus ) - 2.288050 -> hsa:983( CDC2 , nucleus ) - 2.205244 -> hsa:890( CCNA2 , nucleus )                                                                                                                                                                                                                                                                           | 7  | 17.413538 |
| hsa:5054( SERPINE1 , extracellular ) - 69.278180 -> hsa:5328( PLAU , extracellular ) - 32.655426 -> hsa:3082( HGF ,                                                                                                                                                                                                                                                                                                                                                                                                                                                          | 8  | 17.339251 |



|                                                                                                                                                                                                                                                                                                                                                                                                                                                   |    |           |
|---------------------------------------------------------------------------------------------------------------------------------------------------------------------------------------------------------------------------------------------------------------------------------------------------------------------------------------------------------------------------------------------------------------------------------------------------|----|-----------|
| extracellular ) - 3.247723 -> hsa:4233( MET , cytoplasm ) - 2.071011 -> hsa:5295( PIK3R1 , cytoplasm ) - 7.622199<br>-> hsa:1759( DNMI , cytoplasm ) - 2.089730 -> hsa:5578( PRKCA , cytoplasm ) - 4.410487 -> hsa:5465( PPARA , nucleus )                                                                                                                                                                                                        |    |           |
| hsa:5054( SERPINE1 , extracellular ) - 69.278180 -> hsa:5328( PLAU , extracellular ) - 32.655426 -> hsa:3082( HGF ,<br>extracellular ) - 3.247723 -> hsa:4233( MET , cytoplasm ) - 2.071011 -> hsa:5295( PIK3R1 , cytoplasm ) - 7.622199<br>-> hsa:1759( DNMI , cytoplasm ) - 2.089730 -> hsa:5578( PRKCA , cytoplasm ) - 4.410487 -> hsa:5914( RARA , nucleus )                                                                                  | 8  | 17.339251 |
| hsa:5345( SERPINF2 , extracellular ) - 69.278180 -> hsa:5328( PLAU , extracellular ) - 32.655426 -> hsa:3082( HGF ,<br>extracellular ) - 3.247723 -> hsa:4233( MET , cytoplasm ) - 2.071011 -> hsa:5295( PIK3R1 , cytoplasm ) - 7.622199<br>-> hsa:1759( DNMI , cytoplasm ) - 2.089730 -> hsa:5578( PRKCA , cytoplasm ) - 4.410487 -> hsa:5465( PPARA , nucleus )                                                                                 | 8  | 17.339251 |
| hsa:5345( SERPINF2 , extracellular ) - 69.278180 -> hsa:5328( PLAU , extracellular ) - 32.655426 -> hsa:3082( HGF ,<br>extracellular ) - 3.247723 -> hsa:4233( MET , cytoplasm ) - 2.071011 -> hsa:5295( PIK3R1 , cytoplasm ) - 7.622199<br>-> hsa:1759( DNMI , cytoplasm ) - 2.089730 -> hsa:5578( PRKCA , cytoplasm ) - 4.410487 -> hsa:5914( RARA , nucleus )                                                                                  | 8  | 17.339251 |
| hsa:5269( SERPINB6 , extracellular ) - 69.278180 -> hsa:5328( PLAU , extracellular ) - 32.655426 -> hsa:3082( HGF ,<br>extracellular ) - 3.247723 -> hsa:4233( MET , cytoplasm ) - 2.071011 -> hsa:5295( PIK3R1 , cytoplasm ) - 7.622199<br>-> hsa:1759( DNMI , cytoplasm ) - 2.089730 -> hsa:5578( PRKCA , cytoplasm ) - 4.410487 -> hsa:5465( PPARA , nucleus )                                                                                 | 8  | 17.339251 |
| hsa:5269( SERPINB6 , extracellular ) - 69.278180 -> hsa:5328( PLAU , extracellular ) - 32.655426 -> hsa:3082( HGF ,<br>extracellular ) - 3.247723 -> hsa:4233( MET , cytoplasm ) - 2.071011 -> hsa:5295( PIK3R1 , cytoplasm ) - 7.622199<br>-> hsa:1759( DNMI , cytoplasm ) - 2.089730 -> hsa:5578( PRKCA , cytoplasm ) - 4.410487 -> hsa:5914( RARA , nucleus )                                                                                  | 8  | 17.339251 |
| hsa:5104( SERPINA5 , extracellular ) - 69.278180 -> hsa:5328( PLAU , extracellular ) - 32.655426 -> hsa:3082( HGF ,<br>extracellular ) - 3.247723 -> hsa:4233( MET , cytoplasm ) - 2.071011 -> hsa:5295( PIK3R1 , cytoplasm ) - 7.622199<br>-> hsa:1759( DNMI , cytoplasm ) - 2.089730 -> hsa:5578( PRKCA , cytoplasm ) - 4.410487 -> hsa:5465( PPARA , nucleus )                                                                                 | 8  | 17.339251 |
| hsa:5104( SERPINA5 , extracellular ) - 69.278180 -> hsa:5328( PLAU , extracellular ) - 32.655426 -> hsa:3082( HGF ,<br>extracellular ) - 3.247723 -> hsa:4233( MET , cytoplasm ) - 2.071011 -> hsa:5295( PIK3R1 , cytoplasm ) - 7.622199<br>-> hsa:1759( DNMI , cytoplasm ) - 2.089730 -> hsa:5578( PRKCA , cytoplasm ) - 4.410487 -> hsa:5914( RARA , nucleus )                                                                                  | 8  | 17.339251 |
| hsa:5055( SERPINB2 , extracellular ) - 69.278180 -> hsa:5328( PLAU , extracellular ) - 32.655426 -> hsa:3082( HGF ,<br>extracellular ) - 3.247723 -> hsa:4233( MET , cytoplasm ) - 2.071011 -> hsa:5295( PIK3R1 , cytoplasm ) - 7.622199<br>-> hsa:1759( DNMI , cytoplasm ) - 2.089730 -> hsa:5578( PRKCA , cytoplasm ) - 4.410487 -> hsa:5465( PPARA , nucleus )                                                                                 | 8  | 17.339251 |
| hsa:5055( SERPINB2 , extracellular ) - 69.278180 -> hsa:5328( PLAU , extracellular ) - 32.655426 -> hsa:3082( HGF ,<br>extracellular ) - 3.247723 -> hsa:4233( MET , cytoplasm ) - 2.071011 -> hsa:5295( PIK3R1 , cytoplasm ) - 7.622199<br>-> hsa:1759( DNMI , cytoplasm ) - 2.089730 -> hsa:5578( PRKCA , cytoplasm ) - 4.410487 -> hsa:5914( RARA , nucleus )                                                                                  | 8  | 17.339251 |
| hsa:654( BMP6 , extracellular ) - 65.460916 -> hsa:658( BMPR1B , cytoplasm ) - 2.524005 -> hsa:9459( ARHGFB6 ,<br>cytoplasm ) - 29.522727 -> hsa:998( CDC42 , cytoplasm ) - 2.145471 -> hsa:5601( MAPK9 , cytoplasm ) - 3.032210 -><br>hsa:7597( ZNF46 , nucleus ) - 4.506367 -> hsa:7186( TRAF2 , cytoplasm ) - 38.304122 -> hsa:6478( SIAH2 , nucleus )<br>- 5.177529 -> hsa:10114( HIPK3 , nucleus ) - 4.410487 -> hsa:7026( NR2F2 , nucleus ) | 10 | 17.231537 |
| hsa:3625( INHBB , extracellular ) - 65.460916 -> hsa:90( ACVR1 , cytoplasm ) - 8.820974 -> hsa:3551( IKBKB , cytoplasm )<br>- 5.390596 -> hsa:8826( IQGAP1 , cytoplasm ) - 16.031245 -> hsa:998( CDC42 , cytoplasm ) - 2.145471 -> hsa:5599( MAPK8 ,<br>cytoplasm ) - 5.390596 -> hsa:122953( JDP2 , nucleus )                                                                                                                                    | 7  | 17.206633 |
| hsa:3625( INHBB , extracellular ) - 65.460916 -> hsa:90( ACVR1 , cytoplasm ) - 8.820974 -> hsa:3551( IKBKB , cytoplasm )<br>- 5.390596 -> hsa:8826( IQGAP1 , cytoplasm ) - 16.031245 -> hsa:998( CDC42 , cytoplasm ) - 2.145471 -> hsa:5599( MAPK8 ,<br>cytoplasm ) - 5.390596 -> hsa:3726( JUNB , nucleus )                                                                                                                                      | 7  | 17.206633 |
| hsa:3626( INHBC , extracellular ) - 65.460916 -> hsa:90( ACVR1 , cytoplasm ) - 8.820974 -> hsa:3551( IKBKB , cytoplasm )<br>- 5.390596 -> hsa:8826( IQGAP1 , cytoplasm ) - 16.031245 -> hsa:998( CDC42 , cytoplasm ) - 2.145471 -> hsa:5599( MAPK8 ,<br>cytoplasm ) - 5.390596 -> hsa:122953( JDP2 , nucleus )                                                                                                                                    | 7  | 17.206633 |
| hsa:3626( INHBC , extracellular ) - 65.460916 -> hsa:90( ACVR1 , cytoplasm ) - 8.820974 -> hsa:3551( IKBKB , cytoplasm )<br>- 5.390596 -> hsa:8826( IQGAP1 , cytoplasm ) - 16.031245 -> hsa:998( CDC42 , cytoplasm ) - 2.145471 -> hsa:5599( MAPK8 ,                                                                                                                                                                                              | 7  | 17.206633 |

|                                                                                                                                                                                                                                                                                                                                                                                                                                                                                                                                                                             |    |           |
|-----------------------------------------------------------------------------------------------------------------------------------------------------------------------------------------------------------------------------------------------------------------------------------------------------------------------------------------------------------------------------------------------------------------------------------------------------------------------------------------------------------------------------------------------------------------------------|----|-----------|
| cytoplasm ) - 5.390596 -> hsa:3726( JUNB , nucleus )                                                                                                                                                                                                                                                                                                                                                                                                                                                                                                                        |    |           |
| hsa:12( SERPINA3 , extracellular ) - 69.278180 -> hsa:4485( MST1 , extracellular ) - 3.247723 -> hsa:4486( MST1R , cytoplasm ) - 2.829073 -> hsa:5335( PLCG1 , cytoplasm ) - 20.265953 -> hsa:387( RHOA , cytoplasm ) - 2.145471 -> hsa:5566( PRKACA730418 , cytoplasm ) - 5.390596 -> hsa:2353( FOS , nucleus )                                                                                                                                                                                                                                                            | 7  | 17.192833 |
| hsa:12( SERPINA3 , extracellular ) - 69.278180 -> hsa:4485( MST1 , extracellular ) - 3.247723 -> hsa:4486( MST1R , cytoplasm ) - 2.829073 -> hsa:5335( PLCG1 , cytoplasm ) - 20.265953 -> hsa:387( RHOA , cytoplasm ) - 2.145471 -> hsa:5566( PRKACA730418 , cytoplasm ) - 5.390596 -> hsa:466( ATF1 , nucleus )                                                                                                                                                                                                                                                            | 7  | 17.192833 |
| hsa:5054( SERPINE1 , extracellular ) - 69.278180 -> hsa:5328( PLAU , extracellular ) - 32.655426 -> hsa:3082( HGF , extracellular ) - 3.247723 -> hsa:4233( MET , cytoplasm ) - 2.829073 -> hsa:5335( PLCG1 , cytoplasm ) - 20.265953 -> hsa:387( RHOA , cytoplasm ) - 2.145471 -> hsa:7046( TGFBR1 , cytoplasm ) - 2.306968 -> hsa:3702( ITK , cytoplasm ) - 4.410487 -> hsa:10146( G3BP1 , nucleus )                                                                                                                                                                      | 9  | 17.14241  |
| hsa:5345( SERPINF2 , extracellular ) - 69.278180 -> hsa:5328( PLAU , extracellular ) - 32.655426 -> hsa:3082( HGF , extracellular ) - 3.247723 -> hsa:4233( MET , cytoplasm ) - 2.829073 -> hsa:5335( PLCG1 , cytoplasm ) - 20.265953 -> hsa:387( RHOA , cytoplasm ) - 2.145471 -> hsa:7046( TGFBR1 , cytoplasm ) - 2.306968 -> hsa:3702( ITK , cytoplasm ) - 4.410487 -> hsa:10146( G3BP1 , nucleus )                                                                                                                                                                      | 9  | 17.14241  |
| hsa:5269( SERPINB6 , extracellular ) - 69.278180 -> hsa:5328( PLAU , extracellular ) - 32.655426 -> hsa:3082( HGF , extracellular ) - 3.247723 -> hsa:4233( MET , cytoplasm ) - 2.829073 -> hsa:5335( PLCG1 , cytoplasm ) - 20.265953 -> hsa:387( RHOA , cytoplasm ) - 2.145471 -> hsa:7046( TGFBR1 , cytoplasm ) - 2.306968 -> hsa:3702( ITK , cytoplasm ) - 4.410487 -> hsa:10146( G3BP1 , nucleus )                                                                                                                                                                      | 9  | 17.14241  |
| hsa:5104( SERPINA5 , extracellular ) - 69.278180 -> hsa:5328( PLAU , extracellular ) - 32.655426 -> hsa:3082( HGF , extracellular ) - 3.247723 -> hsa:4233( MET , cytoplasm ) - 2.829073 -> hsa:5335( PLCG1 , cytoplasm ) - 20.265953 -> hsa:387( RHOA , cytoplasm ) - 2.145471 -> hsa:7046( TGFBR1 , cytoplasm ) - 2.306968 -> hsa:3702( ITK , cytoplasm ) - 4.410487 -> hsa:10146( G3BP1 , nucleus )                                                                                                                                                                      | 9  | 17.14241  |
| hsa:5055( SERPINB2 , extracellular ) - 69.278180 -> hsa:5328( PLAU , extracellular ) - 32.655426 -> hsa:3082( HGF , extracellular ) - 3.247723 -> hsa:4233( MET , cytoplasm ) - 2.829073 -> hsa:5335( PLCG1 , cytoplasm ) - 20.265953 -> hsa:387( RHOA , cytoplasm ) - 2.145471 -> hsa:7046( TGFBR1 , cytoplasm ) - 2.306968 -> hsa:3702( ITK , cytoplasm ) - 4.410487 -> hsa:10146( G3BP1 , nucleus )                                                                                                                                                                      | 9  | 17.14241  |
| hsa:12( SERPINA3 , extracellular ) - 69.278180 -> hsa:4485( MST1 , extracellular ) - 3.247723 -> hsa:4486( MST1R , cytoplasm ) - 2.829073 -> hsa:5335( PLCG1 , cytoplasm ) - 12.338863 -> hsa:28964( GIT1 , cytoplasm ) - 19.664149 -> hsa:580( BARD1 , nucleus ) - 19.664149 -> hsa:672( BRCA1 , nucleus ) - 5.177529 -> hsa:4215( MAP3K3 , cytoplasm ) - 4.410487 -> hsa:9782( MATR3 , nucleus )                                                                                                                                                                          | 9  | 17.076269 |
| hsa:2161( F12 , extracellular ) - 35.283898 -> hsa:3848( KRT1 , cytoplasm ) - 4.935545 -> hsa:7082( TJP1 , cytoplasm ) - 2.467773 -> hsa:5339( PLECL1 , cytoplasm ) - 10.282386 -> hsa:6709( SPTAN1 , cytoplasm ) - 4.935545 -> hsa:10006( ABI1 , cytoplasm ) - 5.546739 -> hsa:6654( SOS1 , cytoplasm ) - 37.788059 -> hsa:3265( HRAS , cytoplasm ) - 2.145471 -> hsa:3656( IRAK2 , cytoplasm ) - 23.645307 -> hsa:7189( TRAF6 , cytoplasm ) - 38.304122 -> hsa:867( CBL , cytoplasm ) - 35.124889 -> hsa:6714( SRC , cytoplasm ) - 4.410487 -> hsa:5467( PPAR , nucleus ) | 13 | 17.072518 |
| hsa:2161( F12 , extracellular ) - 35.283898 -> hsa:3848( KRT1 , cytoplasm ) - 4.935545 -> hsa:7082( TJP1 , cytoplasm ) - 2.467773 -> hsa:5339( PLECL1 , cytoplasm ) - 10.282386 -> hsa:6709( SPTAN1 , cytoplasm ) - 4.935545 -> hsa:10006( ABI1 , cytoplasm ) - 5.546739 -> hsa:6654( SOS1 , cytoplasm ) - 37.788059 -> hsa:3265( HRAS , cytoplasm ) - 2.145471 -> hsa:3656( IRAK2 , cytoplasm ) - 23.645307 -> hsa:7189( TRAF6 , cytoplasm ) - 38.304122 -> hsa:867( CBL , cytoplasm ) - 35.124889 -> hsa:2268( FGR , cytoplasm ) - 4.410487 -> hsa:7421( VDR , nucleus )  | 13 | 17.072518 |
| hsa:12( SERPINA3 , extracellular ) - 69.278180 -> hsa:4485( MST1 , extracellular ) - 3.247723 -> hsa:4486( MST1R , cytoplasm ) - 2.829073 -> hsa:5335( PLCG1 , cytoplasm ) - 20.265953 -> hsa:387( RHOA , cytoplasm ) - 2.145471 -> hsa:5566( PRKACA730418 , cytoplasm ) - 4.410487 -> hsa:5725( PTBP1 , nucleus )                                                                                                                                                                                                                                                          | 7  | 17.029481 |

|                                                                                                                                                                                                                                                                                                                                                                                                                                                              |    |           |
|--------------------------------------------------------------------------------------------------------------------------------------------------------------------------------------------------------------------------------------------------------------------------------------------------------------------------------------------------------------------------------------------------------------------------------------------------------------|----|-----------|
| hsa:12( SERPINA3 , extracellular ) - 69.278180 -> hsa:4485( MST1 , extracellular ) - 3.247723 -> hsa:4486( MST1R , cytoplasm ) - 2.829073 -> hsa:5335( PLCG1 , cytoplasm ) - 20.265953 -> hsa:387( RHOA , cytoplasm ) - 2.145471 -> hsa:5566( PRKACA730418 , cytoplasm ) - 4.410487 -> hsa:3184( HNRPD , nucleus )                                                                                                                                           | 7  | 17.029481 |
| hsa:12( SERPINA3 , extracellular ) - 69.278180 -> hsa:4485( MST1 , extracellular ) - 3.247723 -> hsa:4486( MST1R , cytoplasm ) - 2.829073 -> hsa:5335( PLCG1 , cytoplasm ) - 20.265953 -> hsa:387( RHOA , cytoplasm ) - 2.145471 -> hsa:5590( PRKCZ , cytoplasm ) - 4.410487 -> hsa:4691( NCL , nucleus )                                                                                                                                                    | 7  | 17.029481 |
| hsa:12( SERPINA3 , extracellular ) - 69.278180 -> hsa:4485( MST1 , extracellular ) - 3.247723 -> hsa:4486( MST1R , cytoplasm ) - 2.829073 -> hsa:5335( PLCG1 , cytoplasm ) - 20.265953 -> hsa:387( RHOA , cytoplasm ) - 2.145471 -> hsa:5566( PRKACA730418 , cytoplasm ) - 4.410487 -> hsa:2908( NR3C1 , nucleus )                                                                                                                                           | 7  | 17.029481 |
| hsa:5054( SERPINE1 , extracellular ) - 69.278180 -> hsa:5328( PLAU , extracellular ) - 32.655426 -> hsa:3082( HGF , extracellular ) - 3.247723 -> hsa:4233( MET , cytoplasm ) - 2.071011 -> hsa:5295( PIK3R1 , cytoplasm ) - 7.622199 -> hsa:1759( DNMI , cytoplasm ) - 2.089730 -> hsa:5578( PRKCA , cytoplasm ) - 2.205244 -> hsa:4772( NFATC1 , nucleus )                                                                                                 | 8  | 17.024216 |
| hsa:5345( SERPINF2 , extracellular ) - 69.278180 -> hsa:5328( PLAU , extracellular ) - 32.655426 -> hsa:3082( HGF , extracellular ) - 3.247723 -> hsa:4233( MET , cytoplasm ) - 2.071011 -> hsa:5295( PIK3R1 , cytoplasm ) - 7.622199 -> hsa:1759( DNMI , cytoplasm ) - 2.089730 -> hsa:5578( PRKCA , cytoplasm ) - 2.205244 -> hsa:4772( NFATC1 , nucleus )                                                                                                 | 8  | 17.024216 |
| hsa:5269( SERPINB6 , extracellular ) - 69.278180 -> hsa:5328( PLAU , extracellular ) - 32.655426 -> hsa:3082( HGF , extracellular ) - 3.247723 -> hsa:4233( MET , cytoplasm ) - 2.071011 -> hsa:5295( PIK3R1 , cytoplasm ) - 7.622199 -> hsa:1759( DNMI , cytoplasm ) - 2.089730 -> hsa:5578( PRKCA , cytoplasm ) - 2.205244 -> hsa:4772( NFATC1 , nucleus )                                                                                                 | 8  | 17.024216 |
| hsa:5104( SERPINA5 , extracellular ) - 69.278180 -> hsa:5328( PLAU , extracellular ) - 32.655426 -> hsa:3082( HGF , extracellular ) - 3.247723 -> hsa:4233( MET , cytoplasm ) - 2.071011 -> hsa:5295( PIK3R1 , cytoplasm ) - 7.622199 -> hsa:1759( DNMI , cytoplasm ) - 2.089730 -> hsa:5578( PRKCA , cytoplasm ) - 2.205244 -> hsa:4772( NFATC1 , nucleus )                                                                                                 | 8  | 17.024216 |
| hsa:5055( SERPINB2 , extracellular ) - 69.278180 -> hsa:5328( PLAU , extracellular ) - 32.655426 -> hsa:3082( HGF , extracellular ) - 3.247723 -> hsa:4233( MET , cytoplasm ) - 2.071011 -> hsa:5295( PIK3R1 , cytoplasm ) - 7.622199 -> hsa:1759( DNMI , cytoplasm ) - 2.089730 -> hsa:5578( PRKCA , cytoplasm ) - 2.205244 -> hsa:4772( NFATC1 , nucleus )                                                                                                 | 8  | 17.024216 |
| hsa:12( SERPINA3 , extracellular ) - 69.278180 -> hsa:4485( MST1 , extracellular ) - 3.247723 -> hsa:4486( MST1R , cytoplasm ) - 2.071011 -> hsa:3717( JAK2 , cytoplasm ) - 4.010276 -> hsa:7409( VAV1 , cytoplasm ) - 29.522727 -> hsa:387( RHOA , cytoplasm ) - 2.145471 -> hsa:7046( TGFBR1 , cytoplasm ) - 8.820974 -> hsa:7311( UBA52 , nucleus )                                                                                                       | 8  | 17.013766 |
| hsa:3625( INHBB , extracellular ) - 65.460916 -> hsa:90( ACVR1 , cytoplasm ) - 8.820974 -> hsa:3551( IKBKB , cytoplasm ) - 5.390596 -> hsa:8826( IQGAP1 , cytoplasm ) - 16.031245 -> hsa:998( CDC42 , cytoplasm ) - 2.145471 -> hsa:5599( MAPK8 , cytoplasm ) - 4.211403 -> hsa:1386( ATF2 , nucleus )                                                                                                                                                       | 7  | 17.010101 |
| hsa:3625( INHBB , extracellular ) - 65.460916 -> hsa:90( ACVR1 , cytoplasm ) - 8.820974 -> hsa:3551( IKBKB , cytoplasm ) - 5.390596 -> hsa:8826( IQGAP1 , cytoplasm ) - 16.031245 -> hsa:998( CDC42 , cytoplasm ) - 2.145471 -> hsa:5601( MAPK9 , cytoplasm ) - 4.211403 -> hsa:11016( ATF7 , nucleus )                                                                                                                                                      | 7  | 17.010101 |
| hsa:3626( INHBC , extracellular ) - 65.460916 -> hsa:90( ACVR1 , cytoplasm ) - 8.820974 -> hsa:3551( IKBKB , cytoplasm ) - 5.390596 -> hsa:8826( IQGAP1 , cytoplasm ) - 16.031245 -> hsa:998( CDC42 , cytoplasm ) - 2.145471 -> hsa:5599( MAPK8 , cytoplasm ) - 4.211403 -> hsa:1386( ATF2 , nucleus )                                                                                                                                                       | 7  | 17.010101 |
| hsa:3626( INHBC , extracellular ) - 65.460916 -> hsa:90( ACVR1 , cytoplasm ) - 8.820974 -> hsa:3551( IKBKB , cytoplasm ) - 5.390596 -> hsa:8826( IQGAP1 , cytoplasm ) - 16.031245 -> hsa:998( CDC42 , cytoplasm ) - 2.145471 -> hsa:5601( MAPK9 , cytoplasm ) - 4.211403 -> hsa:11016( ATF7 , nucleus )                                                                                                                                                      | 7  | 17.010101 |
| hsa:12( SERPINA3 , extracellular ) - 69.278180 -> hsa:4485( MST1 , extracellular ) - 3.247723 -> hsa:4486( MST1R , cytoplasm ) - 2.071011 -> hsa:5295( PIK3R1 , cytoplasm ) - 3.776765 -> hsa:1399( CRKL , cytoplasm ) - 2.692116 -> hsa:57498( KIDINS220 , cytoplasm ) - 19.664149 -> hsa:4804( NGFR , extracellular ) - 26.023495 -> hsa:7186( TRAF2 , cytoplasm ) - 24.033959 -> hsa:56893( UBQLN4 , nucleus ) - 2.205244 -> hsa:28951( TRIB2 , nucleus ) | 10 | 16.999182 |
| hsa:12( SERPINA3 , extracellular ) - 69.278180 -> hsa:4485( MST1 , extracellular ) - 3.247723 -> hsa:4486( MST1R , cytoplasm ) - 2.071011 -> hsa:5295( PIK3R1 , cytoplasm ) - 3.776765 -> hsa:1399( CRKL , cytoplasm ) - 2.692116 -> hsa:57498( KIDINS220 , cytoplasm ) - 19.664149 -> hsa:4804( NGFR , extracellular ) - 26.023495 -> hsa:7186( TRAF2 , cytoplasm ) - 24.033959 -> hsa:56893( UBQLN4 , nucleus ) - 2.205244 -> hsa:28951( TRIB2 , nucleus ) | 9  | 16.976031 |

|                                                                                                                                                                                                                                                                                                                                                                                                                                                                                                                                                                                                                                            |    |           |
|--------------------------------------------------------------------------------------------------------------------------------------------------------------------------------------------------------------------------------------------------------------------------------------------------------------------------------------------------------------------------------------------------------------------------------------------------------------------------------------------------------------------------------------------------------------------------------------------------------------------------------------------|----|-----------|
| cytoplasm ) - 2.829073 -> hsa:5335( PLCG1 , cytoplasm ) - 12.338863 -> hsa:28964( GIT1 , cytoplasm ) - 19.664149<br>-> hsa:580( BARD1 , nucleus ) - 19.664149 -> hsa:672( BRCA1 , nucleus ) - 5.177529 -> hsa:1022( CDK7 , nucleus )<br>- 3.608580 -> hsa:2966( GTF2H2 , nucleus )                                                                                                                                                                                                                                                                                                                                                         |    |           |
| hsa:2161( F12 , extracellular ) - 35.283898 -> hsa:3848( KRT1 , cytoplasm ) - 4.935545 -> hsa:7082( TJP1 , cytoplasm )<br>- 2.467773 -> hsa:5339( PLEC1 , cytoplasm ) - 10.282386 -> hsa:6709( SPTAN1 , cytoplasm ) - 4.935545 -> hsa:10006( ABI1 ,<br>cytoplasm ) - 5.546739 -> hsa:6654( SOS1 , cytoplasm ) - 37.788059 -> hsa:3265( HRAS , cytoplasm ) - 2.145471 -><br>hsa:3656( IRAK2 , cytoplasm ) - 23.645307 -> hsa:7189( TRAF6 , cytoplasm ) - 38.304122 -> hsa:867( CBL , cytoplasm )<br>- 50.951994 -> hsa:5781( PTPN11 , cytoplasm ) - 2.226038 -> hsa:2064( ERBB2 , cytoplasm ) - 2.071011 -><br>hsa:6830( SUPT6H , nucleus ) | 14 | 16.967991 |
| hsa:12( SERPINA3 , extracellular ) - 69.278180 -> hsa:4485( MST1 , extracellular ) - 3.247723 -> hsa:4486( MST1R ,<br>cytoplasm ) - 2.071011 -> hsa:6464( SHC1 , cytoplasm ) - 7.639366 -> hsa:5335( PLCG1 , cytoplasm ) - 12.338863 -><br>hsa:28964( GIT1 , cytoplasm ) - 19.664149 -> hsa:580( BARD1 , nucleus ) - 19.664149 -> hsa:672( BRCA1 , nucleus )<br>- 5.177529 -> hsa:1019( CDK4 , cytoplasm ) - 13.231462 -> hsa:64210( MMS19 , nucleus )                                                                                                                                                                                     | 10 | 16.923604 |
| hsa:12( SERPINA3 , extracellular ) - 69.278180 -> hsa:4485( MST1 , extracellular ) - 3.247723 -> hsa:4486( MST1R ,<br>cytoplasm ) - 2.829073 -> hsa:5335( PLCG1 , cytoplasm ) - 20.265953 -> hsa:387( RHOA , cytoplasm ) - 2.145471 -><br>hsa:7046( TGFBR1 , cytoplasm ) - 3.608580 -> hsa:3987( LIMS1 , nucleus )                                                                                                                                                                                                                                                                                                                         | 7  | 16.89583  |
| hsa:2161( F12 , extracellular ) - 35.283898 -> hsa:3848( KRT1 , cytoplasm ) - 4.935545 -> hsa:7082( TJP1 , cytoplasm )<br>- 2.467773 -> hsa:5339( PLEC1 , cytoplasm ) - 10.282386 -> hsa:6709( SPTAN1 , cytoplasm ) - 4.935545 -> hsa:10006( ABI1 ,<br>cytoplasm ) - 5.546739 -> hsa:6654( SOS1 , cytoplasm ) - 37.788059 -> hsa:3265( HRAS , cytoplasm ) - 2.145471 -><br>hsa:3656( IRAK2 , cytoplasm ) - 23.645307 -> hsa:7189( TRAF6 , cytoplasm ) - 38.304122 -> hsa:867( CBL , cytoplasm )<br>- 35.124889 -> hsa:25( ABL129892 , cytoplasm ) - 2.205244 -> hsa:81928( CABLES2 , nucleus )                                             | 13 | 16.888748 |
| hsa:3625( INHBB , extracellular ) - 65.460916 -> hsa:90( ACVR1 , cytoplasm ) - 2.071011 -> hsa:9306( SOCS6 , cytoplasm )<br>- 7.622199 -> hsa:8660( IRS2 , cytoplasm ) - 4.398215 -> hsa:5335( PLCG1 , cytoplasm ) - 12.338863 -> hsa:28964( GIT1 ,<br>cytoplasm ) - 19.664149 -> hsa:580( BARD1 , nucleus ) - 2.288050 -> hsa:983( CDC2 , nucleus ) - 3.320395 -><br>hsa:7704( ZBTB16 , nucleus ) - 34.548817 -> hsa:27033( ZBTB32 , nucleus )                                                                                                                                                                                            | 10 | 16.856957 |
| hsa:3626( INHBC , extracellular ) - 65.460916 -> hsa:90( ACVR1 , cytoplasm ) - 2.071011 -> hsa:9306( SOCS6 , cytoplasm )<br>- 7.622199 -> hsa:8660( IRS2 , cytoplasm ) - 4.398215 -> hsa:5335( PLCG1 , cytoplasm ) - 12.338863 -> hsa:28964( GIT1 ,<br>cytoplasm ) - 19.664149 -> hsa:580( BARD1 , nucleus ) - 2.288050 -> hsa:983( CDC2 , nucleus ) - 3.320395 -><br>hsa:7704( ZBTB16 , nucleus ) - 34.548817 -> hsa:7572( ZNF24 , nucleus )                                                                                                                                                                                              | 10 | 16.856957 |
| hsa:12( SERPINA3 , extracellular ) - 69.278180 -> hsa:4485( MST1 , extracellular ) - 3.247723 -> hsa:4486( MST1R ,<br>cytoplasm ) - 2.829073 -> hsa:5335( PLCG1 , cytoplasm ) - 12.338863 -> hsa:28964( GIT1 , cytoplasm ) - 19.664149<br>-> hsa:580( BARD1 , nucleus ) - 19.664149 -> hsa:672( BRCA1 , nucleus ) - 5.177529 -> hsa:1022( CDK7 , nucleus )<br>- 2.205244 -> hsa:902( CCNH , nucleus )                                                                                                                                                                                                                                      | 9  | 16.800614 |
| hsa:12( SERPINA3 , extracellular ) - 69.278180 -> hsa:4485( MST1 , extracellular ) - 3.247723 -> hsa:4486( MST1R ,<br>cytoplasm ) - 2.829073 -> hsa:5335( PLCG1 , cytoplasm ) - 12.338863 -> hsa:28964( GIT1 , cytoplasm ) - 19.664149<br>-> hsa:580( BARD1 , nucleus ) - 19.664149 -> hsa:672( BRCA1 , nucleus ) - 5.177529 -> hsa:1017( CDK2 , cytoplasm )<br>- 2.205244 -> hsa:9134( CCNE2 , nucleus )                                                                                                                                                                                                                                  | 9  | 16.800614 |
| hsa:12( SERPINA3 , extracellular ) - 69.278180 -> hsa:4485( MST1 , extracellular ) - 3.247723 -> hsa:4486( MST1R ,<br>cytoplasm ) - 2.829073 -> hsa:5335( PLCG1 , cytoplasm ) - 12.338863 -> hsa:28964( GIT1 , cytoplasm ) - 19.664149<br>-> hsa:580( BARD1 , nucleus ) - 19.664149 -> hsa:672( BRCA1 , nucleus ) - 5.177529 -> hsa:1017( CDK2 , cytoplasm )<br>- 2.205244 -> hsa:85417( CCNB3 , nucleus )                                                                                                                                                                                                                                 | 9  | 16.800614 |
| hsa:12( SERPINA3 , extracellular ) - 69.278180 -> hsa:4485( MST1 , extracellular ) - 3.247723 -> hsa:4486( MST1R ,<br>cytoplasm ) - 2.829073 -> hsa:5335( PLCG1 , cytoplasm ) - 20.265953 -> hsa:387( RHOA , cytoplasm ) - 2.145471 -><br>hsa:5566( PRKACA730418 , cytoplasm ) - 3.032210 -> hsa:26993( AKAP8L , nucleus )                                                                                                                                                                                                                                                                                                                 | 7  | 16.799768 |

|                                                                                                                                                                                                                                                                                                                                                                                                                                             |    |           |
|---------------------------------------------------------------------------------------------------------------------------------------------------------------------------------------------------------------------------------------------------------------------------------------------------------------------------------------------------------------------------------------------------------------------------------------------|----|-----------|
| hsa:12( SERPINA3 , extracellular ) - 69.278180 -> hsa:4485( MST1 , extracellular ) - 3.247723 -> hsa:4486( MST1R , cytoplasm ) - 2.829073 -> hsa:5335( PLCG1 , cytoplasm ) - 20.265953 -> hsa:387( RHOA , cytoplasm ) - 2.145471 -> hsa:5566( PRKACA730418 , cytoplasm ) - 3.032210 -> hsa:7490( WT1 , nucleus )                                                                                                                            | 7  | 16.799768 |
| hsa:12( SERPINA3 , extracellular ) - 69.278180 -> hsa:4485( MST1 , extracellular ) - 3.247723 -> hsa:4486( MST1R , cytoplasm ) - 2.829073 -> hsa:5335( PLCG1 , cytoplasm ) - 20.265953 -> hsa:387( RHOA , cytoplasm ) - 2.145471 -> hsa:7046( TGFBR1 , cytoplasm ) - 3.032210 -> hsa:130497( OSR1 , nucleus )                                                                                                                               | 7  | 16.799768 |
| hsa:12( SERPINA3 , extracellular ) - 69.278180 -> hsa:4485( MST1 , extracellular ) - 3.247723 -> hsa:4486( MST1R , cytoplasm ) - 2.829073 -> hsa:5335( PLCG1 , cytoplasm ) - 20.265953 -> hsa:387( RHOA , cytoplasm ) - 2.145471 -> hsa:5566( PRKACA730418 , cytoplasm ) - 3.032210 -> hsa:10661( KLF1 , nucleus )                                                                                                                          | 7  | 16.799768 |
| hsa:5054( SERPINE1 , extracellular ) - 69.278180 -> hsa:5328( PLAU , extracellular ) - 32.655426 -> hsa:3082( HGF , extracellular ) - 3.247723 -> hsa:4233( MET , cytoplasm ) - 2.071011 -> hsa:3635( INPP5D646743 , cytoplasm ) - 3.776765 -> hsa:2885( GRB2 , cytoplasm ) - 3.776765 -> hsa:2017( CTTN , cytoplasm ) - 2.692116 -> hsa:55139( ANKZF1 , nucleus )                                                                          | 8  | 16.785427 |
| hsa:5345( SERPINF2 , extracellular ) - 69.278180 -> hsa:5328( PLAU , extracellular ) - 32.655426 -> hsa:3082( HGF , extracellular ) - 3.247723 -> hsa:4233( MET , cytoplasm ) - 2.071011 -> hsa:3635( INPP5D646743 , cytoplasm ) - 3.776765 -> hsa:2885( GRB2 , cytoplasm ) - 3.776765 -> hsa:2017( CTTN , cytoplasm ) - 2.692116 -> hsa:55139( ANKZF1 , nucleus )                                                                          | 8  | 16.785427 |
| hsa:5269( SERPINB6 , extracellular ) - 69.278180 -> hsa:5328( PLAU , extracellular ) - 32.655426 -> hsa:3082( HGF , extracellular ) - 3.247723 -> hsa:4233( MET , cytoplasm ) - 2.071011 -> hsa:3635( INPP5D646743 , cytoplasm ) - 3.776765 -> hsa:2885( GRB2 , cytoplasm ) - 3.776765 -> hsa:2017( CTTN , cytoplasm ) - 2.692116 -> hsa:55139( ANKZF1 , nucleus )                                                                          | 8  | 16.785427 |
| hsa:5104( SERPINA5 , extracellular ) - 69.278180 -> hsa:5328( PLAU , extracellular ) - 32.655426 -> hsa:3082( HGF , extracellular ) - 3.247723 -> hsa:4233( MET , cytoplasm ) - 2.071011 -> hsa:3635( INPP5D646743 , cytoplasm ) - 3.776765 -> hsa:2885( GRB2 , cytoplasm ) - 3.776765 -> hsa:2017( CTTN , cytoplasm ) - 2.692116 -> hsa:55139( ANKZF1 , nucleus )                                                                          | 8  | 16.785427 |
| hsa:5055( SERPINB2 , extracellular ) - 69.278180 -> hsa:5328( PLAU , extracellular ) - 32.655426 -> hsa:3082( HGF , extracellular ) - 3.247723 -> hsa:4233( MET , cytoplasm ) - 2.071011 -> hsa:3635( INPP5D646743 , cytoplasm ) - 3.776765 -> hsa:2885( GRB2 , cytoplasm ) - 3.776765 -> hsa:2017( CTTN , cytoplasm ) - 2.692116 -> hsa:55139( ANKZF1 , nucleus )                                                                          | 8  | 16.785427 |
| hsa:5054( SERPINE1 , extracellular ) - 69.278180 -> hsa:5328( PLAU , extracellular ) - 32.655426 -> hsa:3082( HGF , extracellular ) - 3.247723 -> hsa:4233( MET , cytoplasm ) - 2.829073 -> hsa:5335( PLCG1 , cytoplasm ) - 12.338863 -> hsa:28964( GIT1 , cytoplasm ) - 19.664149 -> hsa:580( BARD1 , nucleus ) - 2.288050 -> hsa:983( CDC2 , nucleus ) - 3.320395 -> hsa:7704( ZBTB16 , nucleus ) - 4.506367 -> hsa:648( BMI1 , nucleus ) | 10 | 16.680914 |
| hsa:5345( SERPINF2 , extracellular ) - 69.278180 -> hsa:5328( PLAU , extracellular ) - 32.655426 -> hsa:3082( HGF , extracellular ) - 3.247723 -> hsa:4233( MET , cytoplasm ) - 2.829073 -> hsa:5335( PLCG1 , cytoplasm ) - 12.338863 -> hsa:28964( GIT1 , cytoplasm ) - 19.664149 -> hsa:580( BARD1 , nucleus ) - 2.288050 -> hsa:983( CDC2 , nucleus ) - 3.320395 -> hsa:7704( ZBTB16 , nucleus ) - 4.506367 -> hsa:648( BMI1 , nucleus ) | 10 | 16.680914 |
| hsa:5269( SERPINB6 , extracellular ) - 69.278180 -> hsa:5328( PLAU , extracellular ) - 32.655426 -> hsa:3082( HGF , extracellular ) - 3.247723 -> hsa:4233( MET , cytoplasm ) - 2.829073 -> hsa:5335( PLCG1 , cytoplasm ) - 12.338863 -> hsa:28964( GIT1 , cytoplasm ) - 19.664149 -> hsa:580( BARD1 , nucleus ) - 2.288050 -> hsa:983( CDC2 , nucleus ) - 3.320395 -> hsa:7704( ZBTB16 , nucleus ) - 4.506367 -> hsa:648( BMI1 , nucleus ) | 10 | 16.680914 |
| hsa:5104( SERPINA5 , extracellular ) - 69.278180 -> hsa:5328( PLAU , extracellular ) - 32.655426 -> hsa:3082( HGF , extracellular ) - 3.247723 -> hsa:4233( MET , cytoplasm ) - 2.829073 -> hsa:5335( PLCG1 , cytoplasm ) - 12.338863 -> hsa:28964( GIT1 , cytoplasm ) - 19.664149 -> hsa:580( BARD1 , nucleus ) - 2.288050 -> hsa:983( CDC2 , nucleus ) - 3.320395 -> hsa:7704( ZBTB16 , nucleus ) - 4.506367 -> hsa:648( BMI1 , nucleus ) | 10 | 16.680914 |
| hsa:5055( SERPINB2 , extracellular ) - 69.278180 -> hsa:5328( PLAU , extracellular ) - 32.655426 -> hsa:3082( HGF , extracellular ) - 3.247723 -> hsa:4233( MET , cytoplasm ) - 2.829073 -> hsa:5335( PLCG1 , cytoplasm ) - 12.338863 -> hsa:28964( GIT1 , cytoplasm ) - 19.664149 -> hsa:580( BARD1 , nucleus ) - 2.288050 -> hsa:983( CDC2 , nucleus ) - 3.320395 -> hsa:7704( ZBTB16 , nucleus ) - 4.506367 -> hsa:648( BMI1 , nucleus ) | 10 | 16.680914 |

|                                                                                                                                                                                                                                                                                                                                                                                                                                         |    |           |
|-----------------------------------------------------------------------------------------------------------------------------------------------------------------------------------------------------------------------------------------------------------------------------------------------------------------------------------------------------------------------------------------------------------------------------------------|----|-----------|
| hsa:654( BMP6 , extracellular ) - 65.460916 -> hsa:658( BMPR1B , cytoplasm ) - 2.524005 -> hsa:9459( ARHGEF6 , cytoplasm ) - 29.522727 -> hsa:998( CDC42 , cytoplasm ) - 2.145471 -> hsa:5601( MAPK9 , cytoplasm ) - 3.032210 -> hsa:7597( ZNF46 , nucleus ) - 4.506367 -> hsa:7186( TRAF2 , cytoplasm ) - 24.033959 -> hsa:56893( UBQLN4 , nucleus ) - 2.205244 -> hsa:28951( TRIB2 , nucleus )                                        | 9  | 16.678862 |
| hsa:3625( INHBB , extracellular ) - 65.460916 -> hsa:90( ACVR1 , cytoplasm ) - 8.820974 -> hsa:3551( IKKBK , cytoplasm ) - 5.390596 -> hsa:8826( IQGAP1 , cytoplasm ) - 16.031245 -> hsa:998( CDC42 , cytoplasm ) - 2.145471 -> hsa:5599( MAPK8 , cytoplasm ) - 2.205244 -> hsa:5966( REL , nucleus )                                                                                                                                   | 7  | 16.675741 |
| hsa:3625( INHBB , extracellular ) - 65.460916 -> hsa:90( ACVR1 , cytoplasm ) - 8.820974 -> hsa:3551( IKKBK , cytoplasm ) - 5.390596 -> hsa:8826( IQGAP1 , cytoplasm ) - 16.031245 -> hsa:998( CDC42 , cytoplasm ) - 2.145471 -> hsa:5601( MAPK9 , cytoplasm ) - 2.205244 -> hsa:4775( NFATC3 , nucleus )                                                                                                                                | 7  | 16.675741 |
| hsa:3626( INHBC , extracellular ) - 65.460916 -> hsa:90( ACVR1 , cytoplasm ) - 8.820974 -> hsa:3551( IKKBK , cytoplasm ) - 5.390596 -> hsa:8826( IQGAP1 , cytoplasm ) - 16.031245 -> hsa:998( CDC42 , cytoplasm ) - 2.145471 -> hsa:5599( MAPK8 , cytoplasm ) - 2.205244 -> hsa:5966( REL , nucleus )                                                                                                                                   | 7  | 16.675741 |
| hsa:3626( INHBC , extracellular ) - 65.460916 -> hsa:90( ACVR1 , cytoplasm ) - 8.820974 -> hsa:3551( IKKBK , cytoplasm ) - 5.390596 -> hsa:8826( IQGAP1 , cytoplasm ) - 16.031245 -> hsa:998( CDC42 , cytoplasm ) - 2.145471 -> hsa:5601( MAPK9 , cytoplasm ) - 2.205244 -> hsa:4775( NFATC3 , nucleus )                                                                                                                                | 7  | 16.675741 |
| hsa:12( SERPINA3 , extracellular ) - 69.278180 -> hsa:4485( MST1 , extracellular ) - 3.247723 -> hsa:4486( MST1R , cytoplasm ) - 2.829073 -> hsa:5335( PLCG1 , cytoplasm ) - 20.265953 -> hsa:387( RHOA , cytoplasm ) - 2.145471 -> hsa:5566( PRKACA730418 , cytoplasm ) - 2.205244 -> hsa:595( CCND1 , nucleus )                                                                                                                       | 7  | 16.661941 |
| hsa:12( SERPINA3 , extracellular ) - 69.278180 -> hsa:4485( MST1 , extracellular ) - 3.247723 -> hsa:4486( MST1R , cytoplasm ) - 2.829073 -> hsa:5335( PLCG1 , cytoplasm ) - 20.265953 -> hsa:387( RHOA , cytoplasm ) - 2.145471 -> hsa:5590( PRKCZ , cytoplasm ) - 2.205244 -> hsa:4773( NFATC2 , nucleus )                                                                                                                            | 7  | 16.661941 |
| hsa:654( BMP6 , extracellular ) - 65.460916 -> hsa:658( BMPR1B , cytoplasm ) - 2.071011 -> hsa:9306( SOCS6 , cytoplasm ) - 7.622199 -> hsa:8660( IRS2 , cytoplasm ) - 4.398215 -> hsa:5335( PLCG1 , cytoplasm ) - 12.338863 -> hsa:28964( GIT1 , cytoplasm ) - 19.664149 -> hsa:580( BARD1 , nucleus ) - 19.664149 -> hsa:672( BRCA1 , nucleus ) - 5.177529 -> hsa:1019( CDK4 , cytoplasm ) - 13.231462 -> hsa:64210( MMS19 , nucleus ) | 10 | 16.625388 |
| hsa:3625( INHBB , extracellular ) - 65.460916 -> hsa:90( ACVR1 , cytoplasm ) - 2.071011 -> hsa:9306( SOCS6 , cytoplasm ) - 7.622199 -> hsa:8660( IRS2 , cytoplasm ) - 4.398215 -> hsa:5335( PLCG1 , cytoplasm ) - 12.338863 -> hsa:28964( GIT1 , cytoplasm ) - 19.664149 -> hsa:580( BARD1 , nucleus ) - 19.664149 -> hsa:672( BRCA1 , nucleus ) - 5.177529 -> hsa:1019( CDK4 , cytoplasm ) - 13.231462 -> hsa:64210( MMS19 , nucleus ) | 10 | 16.625388 |
| hsa:12( SERPINA3 , extracellular ) - 69.278180 -> hsa:4485( MST1 , extracellular ) - 3.247723 -> hsa:4486( MST1R , cytoplasm ) - 2.071011 -> hsa:6464( SHC1 , cytoplasm ) - 2.563870 -> hsa:5578( PRKCA , cytoplasm ) - 4.410487 -> hsa:2130( EWSR1 , nucleus ) - 18.025470 -> hsa:6297( SALL2 , nucleus )                                                                                                                              | 7  | 16.599457 |
| hsa:5054( SERPINE1 , extracellular ) - 69.278180 -> hsa:5328( PLAU , extracellular ) - 32.655426 -> hsa:3082( HGF , extracellular ) - 3.247723 -> hsa:4233( MET , cytoplasm ) - 2.071011 -> hsa:5295( PIK3R1 , cytoplasm ) - 3.776765 -> hsa:23607( CD2AP , cytoplasm ) - 17.324771 -> hsa:5867( RAB4A , cytoplasm ) - 2.145471 -> hsa:983( CDC2 , nucleus ) - 2.205244 -> hsa:8900( CCNA1 , nucleus )                                  | 9  | 16.588074 |
| hsa:5054( SERPINE1 , extracellular ) - 69.278180 -> hsa:5328( PLAU , extracellular ) - 32.655426 -> hsa:3082( HGF , extracellular ) - 3.247723 -> hsa:4233( MET , cytoplasm ) - 2.071011 -> hsa:5295( PIK3R1 , cytoplasm ) - 3.776765 -> hsa:23607( CD2AP , cytoplasm ) - 17.324771 -> hsa:5867( RAB4A , cytoplasm ) - 2.145471 -> hsa:983( CDC2 , nucleus ) - 2.205244 -> hsa:898( CCNE1 , nucleus )                                   | 9  | 16.588074 |
| hsa:5345( SERPINF2 , extracellular ) - 69.278180 -> hsa:5328( PLAU , extracellular ) - 32.655426 -> hsa:3082( HGF , extracellular ) - 3.247723 -> hsa:4233( MET , cytoplasm ) - 2.071011 -> hsa:5295( PIK3R1 , cytoplasm ) - 3.776765 -> hsa:23607( CD2AP , cytoplasm ) - 17.324771 -> hsa:5867( RAB4A , cytoplasm ) - 2.145471 -> hsa:983( CDC2 , nucleus )                                                                            | 9  | 16.588074 |

|                                                                                                                                                                                                                                                                                                                                                                                           |   |           |
|-------------------------------------------------------------------------------------------------------------------------------------------------------------------------------------------------------------------------------------------------------------------------------------------------------------------------------------------------------------------------------------------|---|-----------|
| - 2.205244 -> hsa:8900( CCNA1 , nucleus )                                                                                                                                                                                                                                                                                                                                                 |   |           |
| hsa:5345( SERPINF2 , extracellular ) - 69.278180 -> hsa:5328( PLAU , extracellular ) - 32.655426 -> hsa:3082( HGF , extracellular ) - 3.247723 -> hsa:4233( MET , cytoplasm ) - 2.071011 -> hsa:5295( PIK3R1 , cytoplasm ) - 3.776765 -> hsa:23607( CD2AP , cytoplasm ) - 17.324771 -> hsa:5867( RAB4A , cytoplasm ) - 2.145471 -> hsa:983( CDC2 , nucleus )                              | 9 | 16.588074 |
| - 2.205244 -> hsa:898( CCNE1 , nucleus )                                                                                                                                                                                                                                                                                                                                                  |   |           |
| hsa:5269( SERPINB6 , extracellular ) - 69.278180 -> hsa:5328( PLAU , extracellular ) - 32.655426 -> hsa:3082( HGF , extracellular ) - 3.247723 -> hsa:4233( MET , cytoplasm ) - 2.071011 -> hsa:5295( PIK3R1 , cytoplasm ) - 3.776765 -> hsa:23607( CD2AP , cytoplasm ) - 17.324771 -> hsa:5867( RAB4A , cytoplasm ) - 2.145471 -> hsa:983( CDC2 , nucleus )                              | 9 | 16.588074 |
| - 2.205244 -> hsa:8900( CCNA1 , nucleus )                                                                                                                                                                                                                                                                                                                                                 |   |           |
| hsa:5269( SERPINB6 , extracellular ) - 69.278180 -> hsa:5328( PLAU , extracellular ) - 32.655426 -> hsa:3082( HGF , extracellular ) - 3.247723 -> hsa:4233( MET , cytoplasm ) - 2.071011 -> hsa:5295( PIK3R1 , cytoplasm ) - 3.776765 -> hsa:23607( CD2AP , cytoplasm ) - 17.324771 -> hsa:5867( RAB4A , cytoplasm ) - 2.145471 -> hsa:983( CDC2 , nucleus )                              | 9 | 16.588074 |
| - 2.205244 -> hsa:898( CCNE1 , nucleus )                                                                                                                                                                                                                                                                                                                                                  |   |           |
| hsa:5104( SERPINA5 , extracellular ) - 69.278180 -> hsa:5328( PLAU , extracellular ) - 32.655426 -> hsa:3082( HGF , extracellular ) - 3.247723 -> hsa:4233( MET , cytoplasm ) - 2.071011 -> hsa:5295( PIK3R1 , cytoplasm ) - 3.776765 -> hsa:23607( CD2AP , cytoplasm ) - 17.324771 -> hsa:5867( RAB4A , cytoplasm ) - 2.145471 -> hsa:983( CDC2 , nucleus )                              | 9 | 16.588074 |
| - 2.205244 -> hsa:8900( CCNA1 , nucleus )                                                                                                                                                                                                                                                                                                                                                 |   |           |
| hsa:5104( SERPINA5 , extracellular ) - 69.278180 -> hsa:5328( PLAU , extracellular ) - 32.655426 -> hsa:3082( HGF , extracellular ) - 3.247723 -> hsa:4233( MET , cytoplasm ) - 2.071011 -> hsa:5295( PIK3R1 , cytoplasm ) - 3.776765 -> hsa:23607( CD2AP , cytoplasm ) - 17.324771 -> hsa:5867( RAB4A , cytoplasm ) - 2.145471 -> hsa:983( CDC2 , nucleus )                              | 9 | 16.588074 |
| - 2.205244 -> hsa:898( CCNE1 , nucleus )                                                                                                                                                                                                                                                                                                                                                  |   |           |
| hsa:5055( SERPINB2 , extracellular ) - 69.278180 -> hsa:5328( PLAU , extracellular ) - 32.655426 -> hsa:3082( HGF , extracellular ) - 3.247723 -> hsa:4233( MET , cytoplasm ) - 2.071011 -> hsa:5295( PIK3R1 , cytoplasm ) - 3.776765 -> hsa:23607( CD2AP , cytoplasm ) - 17.324771 -> hsa:5867( RAB4A , cytoplasm ) - 2.145471 -> hsa:983( CDC2 , nucleus )                              | 9 | 16.588074 |
| - 2.205244 -> hsa:8900( CCNA1 , nucleus )                                                                                                                                                                                                                                                                                                                                                 |   |           |
| hsa:5055( SERPINB2 , extracellular ) - 69.278180 -> hsa:5328( PLAU , extracellular ) - 32.655426 -> hsa:3082( HGF , extracellular ) - 3.247723 -> hsa:4233( MET , cytoplasm ) - 2.071011 -> hsa:5295( PIK3R1 , cytoplasm ) - 3.776765 -> hsa:23607( CD2AP , cytoplasm ) - 17.324771 -> hsa:5867( RAB4A , cytoplasm ) - 2.145471 -> hsa:983( CDC2 , nucleus )                              | 9 | 16.588074 |
| - 2.205244 -> hsa:898( CCNE1 , nucleus )                                                                                                                                                                                                                                                                                                                                                  |   |           |
| hsa:654( BMP6 , extracellular ) - 65.460916 -> hsa:658( BMPR1B , cytoplasm ) - 2.524005 -> hsa:9459( ARHGEF6 , cytoplasm ) - 12.338863 -> hsa:28964( GIT1 , cytoplasm ) - 19.664149 -> hsa:580( BARD1 , nucleus ) - 19.664149 -> hsa:672( BRCA1 , nucleus ) - 5.177529 -> hsa:983( CDC2 , nucleus ) - 3.320395 -> hsa:7704( ZBTB16 , nucleus ) - 4.506367 -> hsa:5987( TRIM27 , nucleus ) | 9 | 16.582047 |
| hsa:12( SERPINA3 , extracellular ) - 69.278180 -> hsa:4485( MST1 , extracellular ) - 3.247723 -> hsa:4486( MST1R , cytoplasm ) - 2.071011 -> hsa:3717( JAK2 , cytoplasm ) - 4.010276 -> hsa:7409( VAV1 , cytoplasm ) - 29.522727 -> hsa:3265( HRAS , cytoplasm ) - 2.145471 -> hsa:5599( MAPK8 , cytoplasm ) - 5.390596 -> hsa:122953( JDP2 , nucleus )                                   | 8 | 16.523712 |
| hsa:12( SERPINA3 , extracellular ) - 69.278180 -> hsa:4485( MST1 , extracellular ) - 3.247723 -> hsa:4486( MST1R , cytoplasm ) - 2.071011 -> hsa:3717( JAK2 , cytoplasm ) - 4.010276 -> hsa:7409( VAV1 , cytoplasm ) - 29.522727 -> hsa:3265( HRAS , cytoplasm ) - 2.145471 -> hsa:5599( MAPK8 , cytoplasm ) - 5.390596 -> hsa:3726( JUNB , nucleus )                                     | 8 | 16.523712 |
| hsa:12( SERPINA3 , extracellular ) - 69.278180 -> hsa:4485( MST1 , extracellular ) - 3.247723 -> hsa:4486( MST1R , cytoplasm ) - 2.071011 -> hsa:5295( PIK3R1 , cytoplasm ) - 3.776765 -> hsa:10451( VAV3 , cytoplasm ) - 17.324771 -> hsa:387( RHOA , cytoplasm ) - 2.145471 -> hsa:7046( TGFBR1 , cytoplasm ) - 17.330023 -> hsa:4087( SMAD2 , nucleus )                                | 8 | 16.453421 |
| hsa:654( BMP6 , extracellular ) - 65.460916 -> hsa:658( BMPR1B , cytoplasm ) - 2.071011 -> hsa:9306( SOCS6 , cytoplasm ) - 7.622199 -> hsa:8660( IRS2 , cytoplasm ) - 4.398215 -> hsa:5335( PLCG1 , cytoplasm ) - 20.265953 -> hsa:387( RHOA ,                                                                                                                                            | 8 | 16.390728 |

|                                                                                                                                                                                                                                                                                                                                                                                                                                                                                                                                                                            |    |           |
|----------------------------------------------------------------------------------------------------------------------------------------------------------------------------------------------------------------------------------------------------------------------------------------------------------------------------------------------------------------------------------------------------------------------------------------------------------------------------------------------------------------------------------------------------------------------------|----|-----------|
| cytoplasm ) - 12.711560 -> hsa:5585( PKN1 , cytoplasm ) - 2.205244 -> hsa:905( CCNT2 , nucleus )                                                                                                                                                                                                                                                                                                                                                                                                                                                                           |    |           |
| hsa:12( SERPINA3 , extracellular ) - 69.278180 -> hsa:4485( MST1 , extracellular ) - 3.247723 -> hsa:4486( MST1R , cytoplasm ) - 2.071011 -> hsa:6464( SHC1 , cytoplasm ) - 2.563870 -> hsa:5578( PRKCA , cytoplasm ) - 4.410487 -> hsa:5465( PPARA , nucleus )                                                                                                                                                                                                                                                                                                            | 6  | 16.314254 |
| hsa:12( SERPINA3 , extracellular ) - 69.278180 -> hsa:4485( MST1 , extracellular ) - 3.247723 -> hsa:4486( MST1R , cytoplasm ) - 2.071011 -> hsa:6464( SHC1 , cytoplasm ) - 2.563870 -> hsa:5578( PRKCA , cytoplasm ) - 4.410487 -> hsa:5914( RARA , nucleus )                                                                                                                                                                                                                                                                                                             | 6  | 16.314254 |
| hsa:12( SERPINA3 , extracellular ) - 69.278180 -> hsa:4485( MST1 , extracellular ) - 3.247723 -> hsa:4486( MST1R , cytoplasm ) - 2.071011 -> hsa:5295( PIK3R1 , cytoplasm ) - 3.776765 -> hsa:2885( GRB2 , cytoplasm ) - 17.324771 -> hsa:58480( RHOU , cytoplasm ) - 22.752059 -> hsa:5058( PAK1 , cytoplasm ) - 7.217161 -> hsa:1457( CSNK2A1 , cytoplasm ) - 4.410487 -> hsa:5241( PGR , nucleus )                                                                                                                                                                      | 9  | 16.25977  |
| hsa:12( SERPINA3 , extracellular ) - 69.278180 -> hsa:4485( MST1 , extracellular ) - 3.247723 -> hsa:4486( MST1R , cytoplasm ) - 2.071011 -> hsa:5295( PIK3R1 , cytoplasm ) - 3.776765 -> hsa:2885( GRB2 , cytoplasm ) - 17.324771 -> hsa:58480( RHOU , cytoplasm ) - 22.752059 -> hsa:5058( PAK1 , cytoplasm ) - 7.217161 -> hsa:9641( IKBKE , cytoplasm ) - 4.410487 -> hsa:4670( HNRPM , nucleus )                                                                                                                                                                      | 9  | 16.25977  |
| hsa:12( SERPINA3 , extracellular ) - 69.278180 -> hsa:4485( MST1 , extracellular ) - 3.247723 -> hsa:4486( MST1R , cytoplasm ) - 2.071011 -> hsa:5295( PIK3R1 , cytoplasm ) - 3.776765 -> hsa:10451( VAV3 , cytoplasm ) - 17.324771 -> hsa:5879( RAC1 , golgi ) - 15.788264 -> hsa:5062( PAK2 , cytoplasm ) - 2.206641 -> hsa:25( ABL129892 , cytoplasm ) - 16.171787 -> hsa:7161( TP73 , nucleus )                                                                                                                                                                        | 9  | 16.233143 |
| hsa:12( SERPINA3 , extracellular ) - 69.278180 -> hsa:4485( MST1 , extracellular ) - 3.247723 -> hsa:4486( MST1R , cytoplasm ) - 2.071011 -> hsa:5295( PIK3R1 , cytoplasm ) - 3.776765 -> hsa:2885( GRB2 , cytoplasm ) - 10.944035 -> hsa:4952( OCLR , cytoplasm ) - 33.843739 -> hsa:5868( RAB5A , cytoplasm ) - 2.145471 -> hsa:9641( IKBKE , cytoplasm ) - 4.410487 -> hsa:10642( IGF2BP1 , nucleus )                                                                                                                                                                   | 9  | 16.214676 |
| hsa:654( BMP6 , extracellular ) - 65.460916 -> hsa:658( BMPR1B , cytoplasm ) - 2.071011 -> hsa:1123( CHN1 , cytoplasm ) - 33.843739 -> hsa:5879( RAC1 , golgi ) - 2.145471 -> hsa:5578( PRKCA , cytoplasm ) - 5.748303 -> hsa:9463( PICK1 , cytoplasm ) - 2.115234 -> hsa:375( ARF1 , golgi ) - 28.344131 -> hsa:7094( TLN1 , cytoplasm ) - 3.307865 -> hsa:2064( ERBB2 , cytoplasm ) - 2.071011 -> hsa:6830( SUPT6H , nucleus )                                                                                                                                           | 10 | 16.123076 |
| hsa:2161( F12 , extracellular ) - 35.283898 -> hsa:3848( KRT1 , cytoplasm ) - 4.935545 -> hsa:7082( TJP1 , cytoplasm ) - 2.467773 -> hsa:5339( PLECL1 , cytoplasm ) - 10.282386 -> hsa:6709( SPTAN1 , cytoplasm ) - 4.935545 -> hsa:10006( ABI1 , cytoplasm ) - 5.546739 -> hsa:6654( SOS1 , cytoplasm ) - 37.788059 -> hsa:3265( HRAS , cytoplasm ) - 2.145471 -> hsa:3656( IRAK2 , cytoplasm ) - 23.645307 -> hsa:7189( TRAF6 , cytoplasm ) - 38.304122 -> hsa:867( CBL , cytoplasm ) - 9.204496 -> hsa:1956( EGFR , cytoplasm ) - 18.468916 -> hsa:3064( HD , nucleus ) | 13 | 16.084021 |
| hsa:12( SERPINA3 , extracellular ) - 69.278180 -> hsa:4485( MST1 , extracellular ) - 3.247723 -> hsa:4486( MST1R , cytoplasm ) - 2.071011 -> hsa:3717( JAK2 , cytoplasm ) - 4.010276 -> hsa:7409( VAV1 , cytoplasm ) - 29.522727 -> hsa:3265( HRAS , cytoplasm ) - 2.145471 -> hsa:5599( MAPK8 , cytoplasm ) - 2.205244 -> hsa:5966( REL , nucleus )                                                                                                                                                                                                                       | 8  | 16.068662 |
| hsa:3625( INHBB , extracellular ) - 65.460916 -> hsa:90( ACVR1 , cytoplasm ) - 8.820974 -> hsa:3551( IKBKB , cytoplasm ) - 3.032210 -> hsa:8517( IKBKG , nucleus ) - 4.506367 -> hsa:26994( RNF11 , cytoplasm ) - 24.033959 -> hsa:56893( UBQLN4 , nucleus ) - 2.205244 -> hsa:1760( DMPK , cytoplasm ) - 4.410487 -> hsa:10658( CUGBP1 , nucleus )                                                                                                                                                                                                                        | 8  | 16.067165 |
| hsa:3626( INHBC , extracellular ) - 65.460916 -> hsa:90( ACVR1 , cytoplasm ) - 8.820974 -> hsa:3551( IKBKB , cytoplasm ) - 3.032210 -> hsa:8517( IKBKG , nucleus ) - 4.506367 -> hsa:26994( RNF11 , cytoplasm ) - 24.033959 -> hsa:56893( UBQLN4 , nucleus ) - 2.205244 -> hsa:1760( DMPK , cytoplasm ) - 4.410487 -> hsa:10658( CUGBP1 , nucleus )                                                                                                                                                                                                                        | 8  | 16.067165 |
| hsa:654( BMP6 , extracellular ) - 65.460916 -> hsa:658( BMPR1B , cytoplasm ) - 2.071011 -> hsa:9306( SOCS6 , cytoplasm ) - 7.896873 -> hsa:5296( PIK3R2 , cytoplasm ) - 6.441242 -> hsa:6654( SOS1 , cytoplasm ) - 37.788059 -> hsa:3265( HRAS , cytoplasm ) - 2.145471 -> hsa:3643( INSR , endoplasmic reticulum ) - 3.041705 -> hsa:2888( GRB14 , cytoplasm ) -                                                                                                                                                                                                          | 9  | 16.009477 |





|                                                                                                                                                                                                                                                                                                                                                                                                                                                   |    |           |
|---------------------------------------------------------------------------------------------------------------------------------------------------------------------------------------------------------------------------------------------------------------------------------------------------------------------------------------------------------------------------------------------------------------------------------------------------|----|-----------|
| extracellular ) - 3.247723 -> hsa:4233( MET , cytoplasm ) - 2.071011 -> hsa:5295( PIK3R1 , cytoplasm ) - 3.776765<br>-> hsa:1399( CRKL , cytoplasm ) - 5.127839 -> hsa:7454( WAS , cytoplasm ) - 7.217161 -> hsa:1457( CSNK2A1 , cytoplasm )<br>- 4.410487 -> hsa:3181( HNRNPA2B1 , nucleus )                                                                                                                                                     |    |           |
| hsa:12( SERPINA3 , extracellular ) - 69.278180 -> hsa:4485( MST1 , extracellular ) - 3.247723 -> hsa:4486( MST1R ,<br>cytoplasm ) - 2.071011 -> hsa:6464( SHC1 , cytoplasm ) - 7.639366 -> hsa:5335( PLCG1 , cytoplasm ) - 12.338863 -><br>hsa:28964( GIT1 , cytoplasm ) - 19.664149 -> hsa:580( BARD1 , nucleus ) - 19.664149 -> hsa:672( BRCA1 , nucleus )<br>- 5.177529 -> hsa:1022( CDK7 , nucleus ) - 4.410487 -> hsa:7067( THRA , nucleus ) | 10 | 15.943495 |
| hsa:654( BMP6 , extracellular ) - 65.460916 -> hsa:658( BMPR1B , cytoplasm ) - 2.524005 -> hsa:9459( ARHGEF6 ,<br>cytoplasm ) - 29.522727 -> hsa:998( CDC42 , cytoplasm ) - 2.145471 -> hsa:5590( PRKCZ , cytoplasm ) - 4.932782 -><br>hsa:5894( RAF1 , cytoplasm ) - 3.307865 -> hsa:5595( MAPK3 , nucleus ) - 3.320395 -> hsa:7553( ZNF7 , nucleus )                                                                                            | 8  | 15.887737 |
| hsa:12( SERPINA3 , extracellular ) - 69.278180 -> hsa:4485( MST1 , extracellular ) - 3.247723 -> hsa:4486( MST1R ,<br>cytoplasm ) - 2.071011 -> hsa:6464( SHC1 , cytoplasm ) - 2.563870 -> hsa:5578( PRKCA , cytoplasm ) - 2.205244 -><br>hsa:4772( NFATC1 , nucleus )                                                                                                                                                                            | 6  | 15.873206 |
| hsa:12( SERPINA3 , extracellular ) - 69.278180 -> hsa:4485( MST1 , extracellular ) - 3.247723 -> hsa:4486( MST1R ,<br>cytoplasm ) - 2.829073 -> hsa:5335( PLCG1 , cytoplasm ) - 20.265953 -> hsa:387( RHOA , cytoplasm ) - 2.145471 -><br>hsa:7046( TGFBR1 , cytoplasm ) - 8.820974 -> hsa:1147( CHUK , cytoplasm ) - 4.410487 -> hsa:7182( NR2C2 , nucleus )                                                                                     | 8  | 15.856837 |
| hsa:2247( FGF2 , extracellular ) - 14.093896 -> hsa:2260( FGFR1 , cytoplasm ) - 17.554500 -> hsa:3837( KPNB1 , nucleus )                                                                                                                                                                                                                                                                                                                          | 3  | 15.824198 |
| hsa:8817( FGF18 , extracellular ) - 14.093896 -> hsa:2260( FGFR1 , cytoplasm ) - 17.554500 -> hsa:3837( KPNB1 ,<br>nucleus )                                                                                                                                                                                                                                                                                                                      | 3  | 15.824198 |
| hsa:8822( FGF17 , extracellular ) - 14.093896 -> hsa:2260( FGFR1 , cytoplasm ) - 17.554500 -> hsa:3837( KPNB1 ,<br>nucleus )                                                                                                                                                                                                                                                                                                                      | 3  | 15.824198 |
| hsa:2250( FGF5 , extracellular ) - 14.093896 -> hsa:2260( FGFR1 , cytoplasm ) - 17.554500 -> hsa:3837( KPNB1 , nucleus )                                                                                                                                                                                                                                                                                                                          | 3  | 15.824198 |
| hsa:2249( FGF4 , extracellular ) - 14.093896 -> hsa:2260( FGFR1 , cytoplasm ) - 17.554500 -> hsa:3837( KPNB1 , nucleus )                                                                                                                                                                                                                                                                                                                          | 3  | 15.824198 |
| hsa:2248( FGF3 , extracellular ) - 14.093896 -> hsa:2260( FGFR1 , cytoplasm ) - 17.554500 -> hsa:3837( KPNB1 , nucleus )                                                                                                                                                                                                                                                                                                                          | 3  | 15.824198 |
| hsa:2252( FGF7 , extracellular ) - 14.093896 -> hsa:2260( FGFR1 , cytoplasm ) - 17.554500 -> hsa:3837( KPNB1 , nucleus )                                                                                                                                                                                                                                                                                                                          | 3  | 15.824198 |
| hsa:2251( FGF6 , extracellular ) - 14.093896 -> hsa:2260( FGFR1 , cytoplasm ) - 17.554500 -> hsa:3837( KPNB1 , nucleus )                                                                                                                                                                                                                                                                                                                          | 3  | 15.824198 |
| hsa:2254( FGF9 , extracellular ) - 14.093896 -> hsa:2260( FGFR1 , cytoplasm ) - 17.554500 -> hsa:3837( KPNB1 , nucleus )                                                                                                                                                                                                                                                                                                                          | 3  | 15.824198 |
| hsa:2253( FGF8 , extracellular ) - 14.093896 -> hsa:2260( FGFR1 , cytoplasm ) - 17.554500 -> hsa:3837( KPNB1 , nucleus )                                                                                                                                                                                                                                                                                                                          | 3  | 15.824198 |
| hsa:2246( FGF1 , extracellular ) - 14.093896 -> hsa:2260( FGFR1 , cytoplasm ) - 17.554500 -> hsa:3837( KPNB1 , nucleus )                                                                                                                                                                                                                                                                                                                          | 3  | 15.824198 |
| hsa:12( SERPINA3 , extracellular ) - 69.278180 -> hsa:4485( MST1 , extracellular ) - 3.247723 -> hsa:4486( MST1R ,<br>cytoplasm ) - 2.071011 -> hsa:5295( PIK3R1 , cytoplasm ) - 3.776765 -> hsa:10451( VAV3 , cytoplasm ) - 17.324771<br>-> hsa:387( RHOA , cytoplasm ) - 12.711560 -> hsa:5585( PKN1 , cytoplasm ) - 2.205244 -> hsa:905( CCNT2 , nucleus )                                                                                     | 8  | 15.802179 |
| hsa:654( BMP6 , extracellular ) - 65.460916 -> hsa:658( BMPR1B , cytoplasm ) - 2.524005 -> hsa:9459( ARHGEF6 ,<br>cytoplasm ) - 12.338863 -> hsa:28964( GIT1 , cytoplasm ) - 19.664149 -> hsa:580( BARD1 , nucleus ) - 2.288050 -><br>hsa:983( CDC2 , nucleus ) - 3.320395 -> hsa:7704( ZBTB16 , nucleus ) - 4.506367 -> hsa:648( BMI1 , nucleus )                                                                                                | 8  | 15.728964 |
| hsa:654( BMP6 , extracellular ) - 65.460916 -> hsa:658( BMPR1B , cytoplasm ) - 2.071011 -> hsa:1123( CHN1 , cytoplasm )<br>- 33.843739 -> hsa:5879( RAC1 , golgi ) - 15.788264 -> hsa:5062( PAK2 , cytoplasm ) - 7.217161 -> hsa:5595( MAPK3 ,<br>nucleus ) - 3.032210 -> hsa:6667( SPI1 , nucleus ) - 4.506367 -> hsa:5371( PML , nucleus ) - 5.177529 -> hsa:1432( MAPK14 ,<br>cytoplasm ) - 4.410487 -> hsa:10891( PPARG1 , nucleus )          | 10 | 15.723076 |
| hsa:654( BMP6 , extracellular ) - 65.460916 -> hsa:658( BMPR1B , cytoplasm ) - 2.524005 -> hsa:9459( ARHGEF6 ,<br>cytoplasm ) - 29.522727 -> hsa:998( CDC42 , cytoplasm ) - 2.145471 -> hsa:5590( PRKCZ , cytoplasm ) - 3.717411 -><br>hsa:60312( AFAP1 , cytoplasm ) - 2.089730 -> hsa:5578( PRKCA , cytoplasm ) - 4.410487 -> hsa:5914( RARA , nucleus )                                                                                        | 8  | 15.695821 |
| hsa:654( BMP6 , extracellular ) - 65.460916 -> hsa:658( BMPR1B , cytoplasm ) - 2.524005 -> hsa:9459( ARHGEF6 ,<br>cytoplasm ) - 12.338863 -> hsa:28964( GIT1 , cytoplasm ) - 19.664149 -> hsa:580( BARD1 , nucleus ) - 2.288050 ->                                                                                                                                                                                                                | 8  | 15.687794 |

|                                                                                                                                                                                                                                                                                                                                                                                                                                                          |    |           |
|----------------------------------------------------------------------------------------------------------------------------------------------------------------------------------------------------------------------------------------------------------------------------------------------------------------------------------------------------------------------------------------------------------------------------------------------------------|----|-----------|
| hsa:983( CDC2 , nucleus ) - 3.032210 -> hsa:10524( HTATIP , nucleus ) - 4.506367 -> hsa:648( BMI1 , nucleus )                                                                                                                                                                                                                                                                                                                                            |    |           |
| hsa:12( SERPINA3 , extracellular ) - 69.278180 -> hsa:4485( MST1 , extracellular ) - 3.247723 -> hsa:4486( MST1R , cytoplasm ) - 2.071011 -> hsa:5295( PIK3R1 , cytoplasm ) - 3.776765 -> hsa:2885( GRB2 , cytoplasm ) - 5.785317 -> hsa:5338( PLD2 , cytoplasm ) - 23.207135 -> hsa:375( ARF1 , golgi ) - 28.344131 -> hsa:7094( TLN1 , cytoplasm ) - 3.307865 -> hsa:2064( ERBB2 , cytoplasm ) - 2.071011 -> hsa:6830( SUPT6H , nucleus )              | 10 | 15.676571 |
| hsa:654( BMP6 , extracellular ) - 65.460916 -> hsa:658( BMPR1B , cytoplasm ) - 2.071011 -> hsa:9306( SOCS6 , cytoplasm ) - 7.622199 -> hsa:8660( IRS2 , cytoplasm ) - 4.398215 -> hsa:5335( PLCG1 , cytoplasm ) - 12.338863 -> hsa:28964( GIT1 , cytoplasm ) - 19.664149 -> hsa:580( BARD1 , nucleus ) - 19.664149 -> hsa:672( BRCA1 , nucleus ) - 5.177529 -> hsa:1022( CDK7 , nucleus ) - 4.410487 -> hsa:7067( THRA , nucleus )                       | 10 | 15.64528  |
| hsa:654( BMP6 , extracellular ) - 65.460916 -> hsa:658( BMPR1B , cytoplasm ) - 2.071011 -> hsa:9306( SOCS6 , cytoplasm ) - 7.622199 -> hsa:8660( IRS2 , cytoplasm ) - 4.398215 -> hsa:5335( PLCG1 , cytoplasm ) - 12.338863 -> hsa:28964( GIT1 , cytoplasm ) - 19.664149 -> hsa:580( BARD1 , nucleus ) - 19.664149 -> hsa:672( BRCA1 , nucleus ) - 5.177529 -> hsa:1022( CDK7 , nucleus ) - 3.608580 -> hsa:2966( GTF2H2 , nucleus )                     | 10 | 15.556179 |
| hsa:654( BMP6 , extracellular ) - 65.460916 -> hsa:658( BMPR1B , cytoplasm ) - 2.524005 -> hsa:9459( ARHGEF6 , cytoplasm ) - 29.522727 -> hsa:998( CDC42 , cytoplasm ) - 2.145471 -> hsa:5590( PRKCZ , cytoplasm ) - 3.717411 -> hsa:60312( AFAP1 , cytoplasm ) - 2.089730 -> hsa:5578( PRKCA , cytoplasm ) - 2.205244 -> hsa:4772( NFATC1 , nucleus )                                                                                                   | 8  | 15.380786 |
| hsa:12( SERPINA3 , extracellular ) - 69.278180 -> hsa:4485( MST1 , extracellular ) - 3.247723 -> hsa:4486( MST1R , cytoplasm ) - 2.829073 -> hsa:5335( PLCG1 , cytoplasm ) - 20.265953 -> hsa:387( RHOA , cytoplasm ) - 2.145471 -> hsa:5590( PRKCZ , cytoplasm ) - 5.280978 -> hsa:3551( IKKBK , cytoplasm ) - 4.410487 -> hsa:7182( NR2C2 , nucleus )                                                                                                  | 8  | 15.351124 |
| hsa:12( SERPINA3 , extracellular ) - 69.278180 -> hsa:4485( MST1 , extracellular ) - 3.247723 -> hsa:4486( MST1R , cytoplasm ) - 2.071011 -> hsa:5295( PIK3R1 , cytoplasm ) - 7.324635 -> hsa:5921( RASA1 , cytoplasm ) - 18.854384 -> hsa:5868( RAB5A , cytoplasm ) - 2.145471 -> hsa:9641( IKBKE , cytoplasm ) - 4.410487 -> hsa:10492( SYNCRIP , nucleus )                                                                                            | 8  | 15.333127 |
| hsa:12( SERPINA3 , extracellular ) - 69.278180 -> hsa:4485( MST1 , extracellular ) - 3.247723 -> hsa:4486( MST1R , cytoplasm ) - 2.071011 -> hsa:5295( PIK3R1 , cytoplasm ) - 3.776765 -> hsa:1399( CRKL , cytoplasm ) - 2.692116 -> hsa:57498( KIDINS220 , cytoplasm ) - 19.664149 -> hsa:4804( NGFR , extracellular ) - 26.023495 -> hsa:7186( TRAF2 , cytoplasm ) - 6.595756 -> hsa:1025( CDK9 , nucleus ) - 4.410487 -> hsa:10002( NR2E3 , nucleus ) | 10 | 15.306631 |
| hsa:12( SERPINA3 , extracellular ) - 69.278180 -> hsa:4485( MST1 , extracellular ) - 3.247723 -> hsa:4486( MST1R , cytoplasm ) - 2.071011 -> hsa:5295( PIK3R1 , cytoplasm ) - 3.776765 -> hsa:10451( VAV3 , cytoplasm ) - 17.324771 -> hsa:5879( RAC1 , golgi ) - 15.788264 -> hsa:5058( PAK1 , cytoplasm ) - 7.217161 -> hsa:984( CDC2L1 , cytoplasm ) - 3.307866 -> hsa:896( CCND3 , nucleus )                                                         | 9  | 15.251468 |
| hsa:654( BMP6 , extracellular ) - 65.460916 -> hsa:658( BMPR1B , cytoplasm ) - 2.071011 -> hsa:9306( SOCS6 , cytoplasm ) - 7.622199 -> hsa:8660( IRS2 , cytoplasm ) - 4.398215 -> hsa:5335( PLCG1 , cytoplasm ) - 20.265953 -> hsa:387( RHOA , cytoplasm ) - 2.145471 -> hsa:5566( PRKACA730418 , cytoplasm ) - 4.410487 -> hsa:3184( HNRPD , nucleus )                                                                                                  | 8  | 15.196322 |
| hsa:654( BMP6 , extracellular ) - 65.460916 -> hsa:658( BMPR1B , cytoplasm ) - 2.524005 -> hsa:9459( ARHGEF6 , cytoplasm ) - 12.338863 -> hsa:28964( GIT1 , cytoplasm ) - 19.664149 -> hsa:580( BARD1 , nucleus ) - 2.288050 -> hsa:983( CDC2 , nucleus ) - 3.320395 -> hsa:7704( ZBTB16 , nucleus ) - 19.527592 -> hsa:7186( TRAF2 , cytoplasm ) - 6.595756 -> hsa:1025( CDK9 , nucleus ) - 4.410487 -> hsa:10002( NR2E3 , nucleus )                    | 10 | 15.125579 |
| hsa:12( SERPINA3 , extracellular ) - 69.278180 -> hsa:4485( MST1 , extracellular ) - 3.247723 -> hsa:4486( MST1R , cytoplasm ) - 2.071011 -> hsa:5295( PIK3R1 , cytoplasm ) - 3.776765 -> hsa:10451( VAV3 , cytoplasm ) - 17.324771 -> hsa:5879( RAC1 , golgi ) - 15.788264 -> hsa:5058( PAK1 , cytoplasm ) - 7.217161 -> hsa:984( CDC2L1 , cytoplasm ) - 2.205244 -> hsa:81669( CCNL2 , nucleus )                                                       | 9  | 15.11364  |
| hsa:12( SERPINA3 , extracellular ) - 69.278180 -> hsa:4485( MST1 , extracellular ) - 3.247723 -> hsa:4486( MST1R , cytoplasm ) - 2.071011 -> hsa:5295( PIK3R1 , cytoplasm ) - 3.776765 -> hsa:10451( VAV3 , cytoplasm ) - 17.324771                                                                                                                                                                                                                      | 9  | 15.092173 |

|                                                                                                                                                                                                                                                                                                                                                                                                                                                                            |    |           |
|----------------------------------------------------------------------------------------------------------------------------------------------------------------------------------------------------------------------------------------------------------------------------------------------------------------------------------------------------------------------------------------------------------------------------------------------------------------------------|----|-----------|
| -> hsa:5879( RAC1 , golgi ) - 15.788264 -> hsa:5058( PAK1 , cytoplasm ) - 3.913667 -> hsa:207( AKT1 , cytoplasm )<br>- 5.337007 -> hsa:79026( AHNAK , nucleus )                                                                                                                                                                                                                                                                                                            |    |           |
| hsa:12( SERPINA3 , extracellular ) - 69.278180 -> hsa:4485( MST1 , extracellular ) - 3.247723 -> hsa:4486( MST1R ,<br>cytoplasm ) - 2.829073 -> hsa:5335( PLCG1 , cytoplasm ) - 20.265953 -> hsa:387( RHOA , cytoplasm ) - 2.145471 -><br>hsa:5590( PRKCZ , cytoplasm ) - 5.280978 -> hsa:3551( IKKKB , cytoplasm ) - 2.520278 -> hsa:8202( NCOA3 , nucleus )                                                                                                              | 8  | 15.081094 |
| hsa:654( BMP6 , extracellular ) - 65.460916 -> hsa:658( BMPR1B , cytoplasm ) - 2.071011 -> hsa:9306( SOCS6 , cytoplasm )<br>- 7.622199 -> hsa:8660( IRS2 , cytoplasm ) - 4.398215 -> hsa:5335( PLCG1 , cytoplasm ) - 20.265953 -> hsa:387( RHOA ,<br>cytoplasm ) - 2.145471 -> hsa:5566( PRKACA730418 , cytoplasm ) - 3.032210 -> hsa:26993( AKAP8L , nucleus )                                                                                                            | 8  | 14.999425 |
| hsa:654( BMP6 , extracellular ) - 65.460916 -> hsa:658( BMPR1B , cytoplasm ) - 2.071011 -> hsa:9306( SOCS6 , cytoplasm )<br>- 7.622199 -> hsa:8660( IRS2 , cytoplasm ) - 4.398215 -> hsa:5335( PLCG1 , cytoplasm ) - 20.265953 -> hsa:387( RHOA ,<br>cytoplasm ) - 2.145471 -> hsa:5566( PRKACA730418 , cytoplasm ) - 3.032210 -> hsa:7490( WT1 , nucleus )                                                                                                                | 8  | 14.999425 |
| hsa:5054( SERPINE1 , extracellular ) - 69.278180 -> hsa:5328( PLAU , extracellular ) - 3.920433 -> hsa:6768( ST14 ,<br>extracellular ) - 17.285546 -> hsa:3082( HGF , extracellular ) - 3.247723 -> hsa:4233( MET , cytoplasm ) - 2.373007<br>-> hsa:7409( VAV1 , cytoplasm ) - 29.522727 -> hsa:3265( HRAS , cytoplasm ) - 2.145471 -> hsa:3643( INSR , endoplasmic<br>reticulum ) - 3.041705 -> hsa:2888( GRB14 , cytoplasm ) - 3.230539 -> hsa:80351( TNKS2 , nucleus ) | 10 | 14.893926 |
| hsa:5345( SERPINF2 , extracellular ) - 69.278180 -> hsa:5328( PLAU , extracellular ) - 3.920433 -> hsa:6768( ST14 ,<br>extracellular ) - 17.285546 -> hsa:3082( HGF , extracellular ) - 3.247723 -> hsa:4233( MET , cytoplasm ) - 2.373007<br>-> hsa:7409( VAV1 , cytoplasm ) - 29.522727 -> hsa:3265( HRAS , cytoplasm ) - 2.145471 -> hsa:3643( INSR , endoplasmic<br>reticulum ) - 3.041705 -> hsa:2888( GRB14 , cytoplasm ) - 3.230539 -> hsa:80351( TNKS2 , nucleus ) | 10 | 14.893926 |
| hsa:5269( SERPINB6 , extracellular ) - 69.278180 -> hsa:5328( PLAU , extracellular ) - 3.920433 -> hsa:6768( ST14 ,<br>extracellular ) - 17.285546 -> hsa:3082( HGF , extracellular ) - 3.247723 -> hsa:4233( MET , cytoplasm ) - 2.373007<br>-> hsa:7409( VAV1 , cytoplasm ) - 29.522727 -> hsa:3265( HRAS , cytoplasm ) - 2.145471 -> hsa:3643( INSR , endoplasmic<br>reticulum ) - 3.041705 -> hsa:2888( GRB14 , cytoplasm ) - 3.230539 -> hsa:80351( TNKS2 , nucleus ) | 10 | 14.893926 |
| hsa:5104( SERPINA5 , extracellular ) - 69.278180 -> hsa:5328( PLAU , extracellular ) - 3.920433 -> hsa:6768( ST14 ,<br>extracellular ) - 17.285546 -> hsa:3082( HGF , extracellular ) - 3.247723 -> hsa:4233( MET , cytoplasm ) - 2.373007<br>-> hsa:7409( VAV1 , cytoplasm ) - 29.522727 -> hsa:3265( HRAS , cytoplasm ) - 2.145471 -> hsa:3643( INSR , endoplasmic<br>reticulum ) - 3.041705 -> hsa:2888( GRB14 , cytoplasm ) - 3.230539 -> hsa:80351( TNKS2 , nucleus ) | 10 | 14.893926 |
| hsa:5055( SERPINB2 , extracellular ) - 69.278180 -> hsa:5328( PLAU , extracellular ) - 3.920433 -> hsa:6768( ST14 ,<br>extracellular ) - 17.285546 -> hsa:3082( HGF , extracellular ) - 3.247723 -> hsa:4233( MET , cytoplasm ) - 2.373007<br>-> hsa:7409( VAV1 , cytoplasm ) - 29.522727 -> hsa:3265( HRAS , cytoplasm ) - 2.145471 -> hsa:3643( INSR , endoplasmic<br>reticulum ) - 3.041705 -> hsa:2888( GRB14 , cytoplasm ) - 3.230539 -> hsa:80351( TNKS2 , nucleus ) | 10 | 14.893926 |
| hsa:654( BMP6 , extracellular ) - 65.460916 -> hsa:658( BMPR1B , cytoplasm ) - 2.524005 -> hsa:9459( ARHGEF6 ,<br>cytoplasm ) - 12.338863 -> hsa:28964( GIT1 , cytoplasm ) - 19.664149 -> hsa:580( BARD1 , nucleus ) - 2.288050 -><br>hsa:983( CDC2 , nucleus ) - 3.320395 -> hsa:7704( ZBTB16 , nucleus ) - 19.527592 -> hsa:7186( TRAF2 , cytoplasm )<br>- 6.595756 -> hsa:1025( CDK9 , nucleus ) - 2.205244 -> hsa:904( CCNT1 , nucleus )                               | 10 | 14.880552 |
| hsa:5054( SERPINE1 , extracellular ) - 69.278180 -> hsa:5328( PLAU , extracellular ) - 32.655426 -> hsa:3082( HGF ,<br>extracellular ) - 3.247723 -> hsa:4233( MET , cytoplasm ) - 2.071011 -> hsa:6464( SHC1 , cytoplasm ) - 2.563870<br>-> hsa:5578( PRKCA , cytoplasm ) - 2.339686 -> hsa:5894( RAF1 , cytoplasm ) - 3.307865 -> hsa:5595( MAPK3 , nucleus )<br>- 3.320395 -> hsa:7553( ZNF7 , nucleus )                                                                | 9  | 14.848019 |
| hsa:5345( SERPINF2 , extracellular ) - 69.278180 -> hsa:5328( PLAU , extracellular ) - 32.655426 -> hsa:3082( HGF ,<br>extracellular ) - 3.247723 -> hsa:4233( MET , cytoplasm ) - 2.071011 -> hsa:6464( SHC1 , cytoplasm ) - 2.563870<br>-> hsa:5578( PRKCA , cytoplasm ) - 2.339686 -> hsa:5894( RAF1 , cytoplasm ) - 3.307865 -> hsa:5595( MAPK3 , nucleus )<br>- 3.320395 -> hsa:7553( ZNF7 , nucleus )                                                                | 9  | 14.848019 |
| hsa:5269( SERPINB6 , extracellular ) - 69.278180 -> hsa:5328( PLAU , extracellular ) - 32.655426 -> hsa:3082( HGF ,                                                                                                                                                                                                                                                                                                                                                        | 9  | 14.848019 |

|                                                                                                                                                                                                                                                                                                                                                                                                              |   |           |
|--------------------------------------------------------------------------------------------------------------------------------------------------------------------------------------------------------------------------------------------------------------------------------------------------------------------------------------------------------------------------------------------------------------|---|-----------|
| extracellular ) - 3.247723 -> hsa:4233( MET , cytoplasm ) - 2.071011 -> hsa:6464( SHC1 , cytoplasm ) - 2.563870<br>-> hsa:5578( PRKCA , cytoplasm ) - 2.339686 -> hsa:5894( RAF1 , cytoplasm ) - 3.307865 -> hsa:5595( MAPK3 , nucleus )<br>- 3.320395 -> hsa:7553( ZNF7 , nucleus )                                                                                                                         |   |           |
| hsa:5104( SERPINA5 , extracellular ) - 69.278180 -> hsa:5328( PLAU , extracellular ) - 32.655426 -> hsa:3082( HGF ,<br>extracellular ) - 3.247723 -> hsa:4233( MET , cytoplasm ) - 2.071011 -> hsa:6464( SHC1 , cytoplasm ) - 2.563870<br>-> hsa:5578( PRKCA , cytoplasm ) - 2.339686 -> hsa:5894( RAF1 , cytoplasm ) - 3.307865 -> hsa:5595( MAPK3 , nucleus )<br>- 3.320395 -> hsa:7553( ZNF7 , nucleus )  | 9 | 14.848019 |
| hsa:5055( SERPINB2 , extracellular ) - 69.278180 -> hsa:5328( PLAU , extracellular ) - 32.655426 -> hsa:3082( HGF ,<br>extracellular ) - 3.247723 -> hsa:4233( MET , cytoplasm ) - 2.071011 -> hsa:6464( SHC1 , cytoplasm ) - 2.563870<br>-> hsa:5578( PRKCA , cytoplasm ) - 2.339686 -> hsa:5894( RAF1 , cytoplasm ) - 3.307865 -> hsa:5595( MAPK3 , nucleus )<br>- 3.320395 -> hsa:7553( ZNF7 , nucleus )  | 9 | 14.848019 |
| hsa:12( SERPINA3 , extracellular ) - 69.278180 -> hsa:4485( MST1 , extracellular ) - 3.247723 -> hsa:4486( MST1R ,<br>cytoplasm ) - 2.071011 -> hsa:3717( JAK2 , cytoplasm ) - 2.318839 -> hsa:2885( GRB2 , cytoplasm ) - 5.602914 -><br>hsa:7409( VAV1 , cytoplasm ) - 29.522727 -> hsa:998( CDC42 , cytoplasm ) - 2.145471 -> hsa:5601( MAPK9 , cytoplasm )<br>- 4.211403 -> hsa:11016( ATF7 , nucleus )   | 9 | 14.799784 |
| hsa:654( BMP6 , extracellular ) - 65.460916 -> hsa:658( BMPR1B , cytoplasm ) - 2.524005 -> hsa:9459( ARHGEF6 ,<br>cytoplasm ) - 29.522727 -> hsa:998( CDC42 , cytoplasm ) - 2.145471 -> hsa:5601( MAPK9 , cytoplasm ) - 3.032210 -><br>hsa:7597( ZNF46 , nucleus ) - 4.506367 -> hsa:7186( TRAF2 , cytoplasm ) - 6.595756 -> hsa:9020( MAP3K14 , cytoplasm )<br>- 4.410487 -> hsa:3178( HNRNPA1 , nucleus )  | 9 | 14.774742 |
| hsa:654( BMP6 , extracellular ) - 65.460916 -> hsa:658( BMPR1B , cytoplasm ) - 2.524005 -> hsa:9459( ARHGEF6 ,<br>cytoplasm ) - 29.522727 -> hsa:998( CDC42 , cytoplasm ) - 2.145471 -> hsa:5601( MAPK9 , cytoplasm ) - 3.032210 -><br>hsa:7597( ZNF46 , nucleus ) - 4.506367 -> hsa:7186( TRAF2 , cytoplasm ) - 6.595756 -> hsa:29110( TBK1 , cytoplasm )<br>- 4.410487 -> hsa:4670( HNRPM , nucleus )      | 9 | 14.774742 |
| hsa:654( BMP6 , extracellular ) - 65.460916 -> hsa:658( BMPR1B , cytoplasm ) - 2.524005 -> hsa:9459( ARHGEF6 ,<br>cytoplasm ) - 29.522727 -> hsa:998( CDC42 , cytoplasm ) - 2.145471 -> hsa:5601( MAPK9 , cytoplasm ) - 3.032210 -><br>hsa:7597( ZNF46 , nucleus ) - 4.506367 -> hsa:7186( TRAF2 , cytoplasm ) - 6.595756 -> hsa:9641( IKBKE , cytoplasm )<br>- 4.410487 -> hsa:10642( IGF2BP1 , nucleus )   | 9 | 14.774742 |
| hsa:654( BMP6 , extracellular ) - 65.460916 -> hsa:658( BMPR1B , cytoplasm ) - 2.524005 -> hsa:9459( ARHGEF6 ,<br>cytoplasm ) - 29.522727 -> hsa:998( CDC42 , cytoplasm ) - 2.145471 -> hsa:5601( MAPK9 , cytoplasm ) - 3.032210 -><br>hsa:7597( ZNF46 , nucleus ) - 4.506367 -> hsa:7186( TRAF2 , cytoplasm ) - 6.595756 -> hsa:1025( CDK9 , nucleus )<br>- 4.410487 -> hsa:10002( NR2E3 , nucleus )        | 9 | 14.774742 |
| hsa:5054( SERPINE1 , extracellular ) - 69.278180 -> hsa:5328( PLAU , extracellular ) - 32.655426 -> hsa:3082( HGF ,<br>extracellular ) - 3.247723 -> hsa:4233( MET , cytoplasm ) - 2.071011 -> hsa:6464( SHC1 , cytoplasm ) - 2.563870<br>-> hsa:5578( PRKCA , cytoplasm ) - 2.339686 -> hsa:5894( RAF1 , cytoplasm ) - 3.307865 -> hsa:5595( MAPK3 , nucleus )<br>- 2.520278 -> hsa:3091( HIF1A , nucleus ) | 9 | 14.748005 |
| hsa:5345( SERPINF2 , extracellular ) - 69.278180 -> hsa:5328( PLAU , extracellular ) - 32.655426 -> hsa:3082( HGF ,<br>extracellular ) - 3.247723 -> hsa:4233( MET , cytoplasm ) - 2.071011 -> hsa:6464( SHC1 , cytoplasm ) - 2.563870<br>-> hsa:5578( PRKCA , cytoplasm ) - 2.339686 -> hsa:5894( RAF1 , cytoplasm ) - 3.307865 -> hsa:5595( MAPK3 , nucleus )<br>- 2.520278 -> hsa:3091( HIF1A , nucleus ) | 9 | 14.748005 |
| hsa:5269( SERPINB6 , extracellular ) - 69.278180 -> hsa:5328( PLAU , extracellular ) - 32.655426 -> hsa:3082( HGF ,<br>extracellular ) - 3.247723 -> hsa:4233( MET , cytoplasm ) - 2.071011 -> hsa:6464( SHC1 , cytoplasm ) - 2.563870<br>-> hsa:5578( PRKCA , cytoplasm ) - 2.339686 -> hsa:5894( RAF1 , cytoplasm ) - 3.307865 -> hsa:5595( MAPK3 , nucleus )<br>- 2.520278 -> hsa:3091( HIF1A , nucleus ) | 9 | 14.748005 |
| hsa:5104( SERPINA5 , extracellular ) - 69.278180 -> hsa:5328( PLAU , extracellular ) - 32.655426 -> hsa:3082( HGF ,                                                                                                                                                                                                                                                                                          | 9 | 14.748005 |

|                                                                                                                                                                                                                                                                                                                                                                                                                                                                                                                                                                                           |    |           |
|-------------------------------------------------------------------------------------------------------------------------------------------------------------------------------------------------------------------------------------------------------------------------------------------------------------------------------------------------------------------------------------------------------------------------------------------------------------------------------------------------------------------------------------------------------------------------------------------|----|-----------|
| extracellular ) - 3.247723 -> hsa:4233( MET , cytoplasm ) - 2.071011 -> hsa:6464( SHC1 , cytoplasm ) - 2.563870<br>-> hsa:5578( PRKCA , cytoplasm ) - 2.339686 -> hsa:5894( RAF1 , cytoplasm ) - 3.307865 -> hsa:5595( MAPK3 , nucleus )<br>- 2.520278 -> hsa:3091( HIF1A , nucleus )                                                                                                                                                                                                                                                                                                     |    |           |
| hsa:5055( SERPINB2 , extracellular ) - 69.278180 -> hsa:5328( PLAU , extracellular ) - 32.655426 -> hsa:3082( HGF ,<br>extracellular ) - 3.247723 -> hsa:4233( MET , cytoplasm ) - 2.071011 -> hsa:6464( SHC1 , cytoplasm ) - 2.563870<br>-> hsa:5578( PRKCA , cytoplasm ) - 2.339686 -> hsa:5894( RAF1 , cytoplasm ) - 3.307865 -> hsa:5595( MAPK3 , nucleus )<br>- 2.520278 -> hsa:3091( HIF1A , nucleus )                                                                                                                                                                              | 9  | 14.748005 |
| hsa:12( SERPINA3 , extracellular ) - 69.278180 -> hsa:4485( MST1 , extracellular ) - 3.247723 -> hsa:4486( MST1R ,<br>cytoplasm ) - 2.071011 -> hsa:6464( SHC1 , cytoplasm ) - 3.090081 -> hsa:5921( RASA1 , cytoplasm ) - 18.854384 -><br>hsa:5906( RAPIA , cytoplasm ) - 2.145471 -> hsa:5566( PRKACA730418 , cytoplasm ) - 4.410487 -> hsa:2908( NR3C1 ,<br>nucleus )                                                                                                                                                                                                                  | 8  | 14.728191 |
| hsa:12( SERPINA3 , extracellular ) - 69.278180 -> hsa:4485( MST1 , extracellular ) - 3.247723 -> hsa:4486( MST1R ,<br>cytoplasm ) - 2.071011 -> hsa:5295( PIK3R1 , cytoplasm ) - 3.776765 -> hsa:2885( GRB2 , cytoplasm ) - 17.324771<br>-> hsa:3265( HRAS , cytoplasm ) - 2.145471 -> hsa:3656( IRAK2 , cytoplasm ) - 23.645307 -> hsa:7189( TRAF6 , cytoplasm )<br>- 6.595756 -> hsa:9020( MAP3K14 , cytoplasm ) - 4.410487 -> hsa:3178( HNRNPA1 , nucleus )                                                                                                                            | 10 | 14.721719 |
| hsa:12( SERPINA3 , extracellular ) - 69.278180 -> hsa:4485( MST1 , extracellular ) - 3.247723 -> hsa:4486( MST1R ,<br>cytoplasm ) - 2.829073 -> hsa:5335( PLCG1 , cytoplasm ) - 12.338863 -> hsa:28964( GIT1 , cytoplasm ) - 19.664149<br>-> hsa:580( BARD1 , nucleus ) - 2.288050 -> hsa:983( CDC2 , nucleus ) - 3.320395 -> hsa:7704( ZBTB16 , nucleus )<br>- 4.506367 -> hsa:5987( TRIM27 , nucleus )                                                                                                                                                                                  | 9  | 14.6841   |
| hsa:2161( F12 , extracellular ) - 35.283898 -> hsa:3848( KRT1 , cytoplasm ) - 4.935545 -> hsa:7082( TJP1 , cytoplasm )<br>- 2.467773 -> hsa:5339( PLECL1 , cytoplasm ) - 10.282386 -> hsa:6709( SPTAN1 , cytoplasm ) - 4.935545 -> hsa:10006( ABI1 ,<br>cytoplasm ) - 5.546739 -> hsa:6654( SOS1 , cytoplasm ) - 37.788059 -> hsa:3265( HRAS , cytoplasm ) - 2.145471 -><br>hsa:3656( IRAK2 , cytoplasm ) - 23.645307 -> hsa:7189( TRAF6 , cytoplasm ) - 38.304122 -> hsa:331( BIRC4 , cytoplasm )<br>- 5.177529 -> hsa:207( AKT1 , cytoplasm ) - 5.390596 -> hsa:1385( CREB1 , nucleus ) | 13 | 14.658581 |
| hsa:12( SERPINA3 , extracellular ) - 69.278180 -> hsa:4485( MST1 , extracellular ) - 3.247723 -> hsa:4486( MST1R ,<br>cytoplasm ) - 2.829073 -> hsa:5335( PLCG1 , cytoplasm ) - 12.338863 -> hsa:28964( GIT1 , cytoplasm ) - 19.664149<br>-> hsa:580( BARD1 , nucleus ) - 2.288050 -> hsa:983( CDC2 , nucleus ) - 3.032210 -> hsa:10524( HTATIP , nucleus )<br>- 4.506367 -> hsa:648( BMI1 , nucleus )                                                                                                                                                                                    | 9  | 14.648077 |
| hsa:12( SERPINA3 , extracellular ) - 69.278180 -> hsa:4485( MST1 , extracellular ) - 3.247723 -> hsa:4486( MST1R ,<br>cytoplasm ) - 2.071011 -> hsa:5295( PIK3R1 , cytoplasm ) - 3.776765 -> hsa:10451( VAV3 , cytoplasm ) - 17.324771<br>-> hsa:5879( RAC1 , golgi ) - 2.145471 -> hsa:5578( PRKCA , cytoplasm ) - 4.410487 -> hsa:5914( RARA , nucleus )                                                                                                                                                                                                                                | 8  | 14.607773 |
| hsa:12( SERPINA3 , extracellular ) - 69.278180 -> hsa:4485( MST1 , extracellular ) - 3.247723 -> hsa:4486( MST1R ,<br>cytoplasm ) - 2.071011 -> hsa:6464( SHC1 , cytoplasm ) - 2.563870 -> hsa:5578( PRKCA , cytoplasm ) - 5.748303 -><br>hsa:4842( NOS1 , endoplasmic reticulum ) - 4.711202 -> hsa:5777( PTPN6 , cytoplasm ) - 14.468929 -> hsa:6778( STAT6 ,<br>nucleus )                                                                                                                                                                                                              | 8  | 14.584174 |
| hsa:3625( INHBB , extracellular ) - 65.460916 -> hsa:90( ACVR1 , cytoplasm ) - 2.071011 -> hsa:9306( SOCS6 , cytoplasm )<br>- 7.622199 -> hsa:8660( IRS2 , cytoplasm ) - 4.398215 -> hsa:5335( PLCG1 , cytoplasm ) - 12.338863 -> hsa:28964( GIT1 ,<br>cytoplasm ) - 19.664149 -> hsa:580( BARD1 , nucleus ) - 2.288050 -> hsa:983( CDC2 , nucleus ) - 2.205244 -><br>hsa:898( CCNE1 , nucleus )                                                                                                                                                                                          | 9  | 14.506081 |
| hsa:3625( INHBB , extracellular ) - 65.460916 -> hsa:90( ACVR1 , cytoplasm ) - 2.071011 -> hsa:9306( SOCS6 , cytoplasm )<br>- 7.622199 -> hsa:8660( IRS2 , cytoplasm ) - 4.398215 -> hsa:5335( PLCG1 , cytoplasm ) - 12.338863 -> hsa:28964( GIT1 ,<br>cytoplasm ) - 19.664149 -> hsa:580( BARD1 , nucleus ) - 2.288050 -> hsa:983( CDC2 , nucleus ) - 2.205244 -><br>hsa:890( CCNA2 , nucleus )                                                                                                                                                                                          | 9  | 14.506081 |
| hsa:3626( INHBC , extracellular ) - 65.460916 -> hsa:90( ACVR1 , cytoplasm ) - 2.071011 -> hsa:9306( SOCS6 , cytoplasm )                                                                                                                                                                                                                                                                                                                                                                                                                                                                  | 9  | 14.506081 |

|                                                                                                                                                                                                                                                                                                                                                                                                                                                                                                                                                                                   |    |           |
|-----------------------------------------------------------------------------------------------------------------------------------------------------------------------------------------------------------------------------------------------------------------------------------------------------------------------------------------------------------------------------------------------------------------------------------------------------------------------------------------------------------------------------------------------------------------------------------|----|-----------|
| - 7.622199 -> hsa:8660( IRS2 , cytoplasm ) - 4.398215 -> hsa:5335( PLCG1 , cytoplasm ) - 12.338863 -> hsa:28964( GIT1 , cytoplasm ) - 19.664149 -> hsa:580( BARD1 , nucleus ) - 2.288050 -> hsa:983( CDC2 , nucleus ) - 2.205244 -> hsa:898( CCNE1 , nucleus )                                                                                                                                                                                                                                                                                                                    |    |           |
| hsa:3626( INHBC , extracellular ) - 65.460916 -> hsa:90( ACVR1 , cytoplasm ) - 2.071011 -> hsa:9306( SOCS6 , cytoplasm ) - 7.622199 -> hsa:8660( IRS2 , cytoplasm ) - 4.398215 -> hsa:5335( PLCG1 , cytoplasm ) - 12.338863 -> hsa:28964( GIT1 , cytoplasm ) - 19.664149 -> hsa:580( BARD1 , nucleus ) - 2.288050 -> hsa:983( CDC2 , nucleus ) - 2.205244 -> hsa:890( CCNA2 , nucleus )                                                                                                                                                                                           | 9  | 14.506081 |
| hsa:12( SERPINA3 , extracellular ) - 69.278180 -> hsa:4485( MST1 , extracellular ) - 3.247723 -> hsa:4486( MST1R , cytoplasm ) - 2.071011 -> hsa:5295( PIK3R1 , cytoplasm ) - 3.776765 -> hsa:10451( VAV3 , cytoplasm ) - 17.324771 -> hsa:387( RHOA , cytoplasm ) - 2.145471 -> hsa:7046( TGFBR1 , cytoplasm ) - 3.608580 -> hsa:3987( LIMS1 , nucleus )                                                                                                                                                                                                                         | 8  | 14.493214 |
| hsa:1950( EGF , extracellular ) - 20.106633 -> hsa:1956( EGFR , cytoplasm ) - 8.820974 -> hsa:7314( UBB , nucleus )                                                                                                                                                                                                                                                                                                                                                                                                                                                               | 3  | 14.463803 |
| hsa:1839( HBEGF , extracellular ) - 20.106633 -> hsa:1956( EGFR , cytoplasm ) - 8.820974 -> hsa:7314( UBB , nucleus )                                                                                                                                                                                                                                                                                                                                                                                                                                                             | 3  | 14.463803 |
| hsa:7039( TGFA , extracellular ) - 20.106633 -> hsa:1956( EGFR , cytoplasm ) - 8.820974 -> hsa:7314( UBB , nucleus )                                                                                                                                                                                                                                                                                                                                                                                                                                                              | 3  | 14.463803 |
| hsa:2069( EREG , extracellular ) - 20.106633 -> hsa:1956( EGFR , cytoplasm ) - 8.820974 -> hsa:7314( UBB , nucleus )                                                                                                                                                                                                                                                                                                                                                                                                                                                              | 3  | 14.463803 |
| hsa:685( BTC , extracellular ) - 20.106633 -> hsa:1956( EGFR , cytoplasm ) - 8.820974 -> hsa:7314( UBB , nucleus )                                                                                                                                                                                                                                                                                                                                                                                                                                                                | 3  | 14.463803 |
| hsa:374( AREG727738 , extracellular ) - 20.106633 -> hsa:1956( EGFR , cytoplasm ) - 8.820974 -> hsa:7314( UBB , nucleus )                                                                                                                                                                                                                                                                                                                                                                                                                                                         | 3  | 14.463803 |
| hsa:4585( MUC4 , extracellular ) - 20.106633 -> hsa:2064( ERBB2 , cytoplasm ) - 8.820974 -> hsa:7314( UBB , nucleus )                                                                                                                                                                                                                                                                                                                                                                                                                                                             | 3  | 14.463803 |
| hsa:2161( F12 , extracellular ) - 35.283898 -> hsa:3848( KRT1 , cytoplasm ) - 4.935545 -> hsa:7082( TJP1 , cytoplasm ) - 2.467773 -> hsa:5339( PLECL1 , cytoplasm ) - 10.282386 -> hsa:6709( SPTAN1 , cytoplasm ) - 4.935545 -> hsa:10006( AB11 , cytoplasm ) - 5.546739 -> hsa:6654( SOS1 , cytoplasm ) - 37.788059 -> hsa:3265( HRAS , cytoplasm ) - 2.145471 -> hsa:3656( IRAK2 , cytoplasm ) - 23.645307 -> hsa:7189( TRAF6 , cytoplasm ) - 38.304122 -> hsa:331( BIRC4 , cytoplasm ) - 5.177529 -> hsa:7046( TGFBR1 , cytoplasm ) - 3.032210 -> hsa:130497( OSR1 , nucleus ) | 13 | 14.462049 |
| hsa:654( BMP6 , extracellular ) - 65.460916 -> hsa:658( BMPRI1B , cytoplasm ) - 2.524005 -> hsa:9459( ARHGEP6 , cytoplasm ) - 29.522727 -> hsa:998( CDC42 , cytoplasm ) - 2.145471 -> hsa:5601( MAPK9 , cytoplasm ) - 3.032210 -> hsa:7597( ZNF46 , nucleus ) - 4.506367 -> hsa:7186( TRAF2 , cytoplasm ) - 6.595756 -> hsa:1025( CDK9 , nucleus ) - 13.231462 -> hsa:27148( STK36 , cytoplasm ) - 3.032210 -> hsa:2735( GLI1 , nucleus )                                                                                                                                         | 10 | 14.450125 |
| hsa:12( SERPINA3 , extracellular ) - 69.278180 -> hsa:4485( MST1 , extracellular ) - 3.247723 -> hsa:4486( MST1R , cytoplasm ) - 2.071011 -> hsa:5295( PIK3R1 , cytoplasm ) - 3.776765 -> hsa:10451( VAV3 , cytoplasm ) - 17.324771 -> hsa:387( RHOA , cytoplasm ) - 2.145471 -> hsa:7046( TGFBR1 , cytoplasm ) - 3.032210 -> hsa:130497( OSR1 , nucleus )                                                                                                                                                                                                                        | 8  | 14.410876 |
| hsa:12( SERPINA3 , extracellular ) - 69.278180 -> hsa:4485( MST1 , extracellular ) - 3.247723 -> hsa:4486( MST1R , cytoplasm ) - 2.071011 -> hsa:5295( PIK3R1 , cytoplasm ) - 3.776765 -> hsa:10451( VAV3 , cytoplasm ) - 17.324771 -> hsa:387( RHOA , cytoplasm ) - 2.145471 -> hsa:5590( PRKCD , cytoplasm ) - 2.205244 -> hsa:4773( NFATC2 , nucleus )                                                                                                                                                                                                                         | 8  | 14.292738 |
| hsa:2161( F12 , extracellular ) - 35.283898 -> hsa:3848( KRT1 , cytoplasm ) - 4.935545 -> hsa:7082( TJP1 , cytoplasm ) - 2.467773 -> hsa:5339( PLECL1 , cytoplasm ) - 10.282386 -> hsa:6709( SPTAN1 , cytoplasm ) - 4.935545 -> hsa:10006( AB11 , cytoplasm ) - 5.546739 -> hsa:6654( SOS1 , cytoplasm ) - 37.788059 -> hsa:3265( HRAS , cytoplasm ) - 2.145471 -> hsa:3656( IRAK2 , cytoplasm ) - 23.645307 -> hsa:7189( TRAF6 , cytoplasm ) - 6.595756 -> hsa:4215( MAP3K3 , cytoplasm ) - 3.320395 -> hsa:7704( ZBTB16 , nucleus ) - 34.548817 -> hsa:7572( ZNF24 , nucleus )  | 13 | 14.291308 |
| hsa:654( BMP6 , extracellular ) - 65.460916 -> hsa:658( BMPRI1B , cytoplasm ) - 2.524005 -> hsa:9459( ARHGEP6 , cytoplasm ) - 29.522727 -> hsa:998( CDC42 , cytoplasm ) - 2.145471 -> hsa:5578( PRKCA , cytoplasm ) - 5.748303 -> hsa:9463( PICK1 , cytoplasm ) - 2.115234 -> hsa:375( ARF1 , golgi ) - 2.145471 -> hsa:3643( INSR , endoplasmic reticulum ) - 4.410487 -> hsa:10492( SYNCRIP , nucleus )                                                                                                                                                                         | 9  | 14.259077 |
| hsa:2161( F12 , extracellular ) - 35.283898 -> hsa:3848( KRT1 , cytoplasm ) - 4.935545 -> hsa:7082( TJP1 , cytoplasm ) - 2.467773 -> hsa:5339( PLECL1 , cytoplasm ) - 10.282386 -> hsa:6709( SPTAN1 , cytoplasm ) - 4.935545 -> hsa:10006( AB11 , cytoplasm )                                                                                                                                                                                                                                                                                                                     | 10 | 14.24812  |

|                                                                                                                                                                                                                                                                                                                                                                                                                                                                                                                                                                                                           |    |           |
|-----------------------------------------------------------------------------------------------------------------------------------------------------------------------------------------------------------------------------------------------------------------------------------------------------------------------------------------------------------------------------------------------------------------------------------------------------------------------------------------------------------------------------------------------------------------------------------------------------------|----|-----------|
| cytoplasm ) - 5.546739 -> hsa:6654( SOS1 , cytoplasm ) - 37.788059 -> hsa:3265( HRAS , cytoplasm ) - 22.582651 -> hsa:5894( RAF1 , cytoplasm ) - 4.410487 -> hsa:367( AR , nucleus )                                                                                                                                                                                                                                                                                                                                                                                                                      |    |           |
| hsa:12( SERPINA3 , extracellular ) - 69.278180 -> hsa:4485( MST1 , extracellular ) - 3.247723 -> hsa:4486( MST1R , cytoplasm ) - 2.071011 -> hsa:5295( PIK3R1 , cytoplasm ) - 3.776765 -> hsa:2885( GRB2 , cytoplasm ) - 3.776765 -> hsa:2017( CTIN , cytoplasm ) - 2.692116 -> hsa:55139( ANKZF1 , nucleus )                                                                                                                                                                                                                                                                                             | 7  | 14.140427 |
| hsa:12( SERPINA3 , extracellular ) - 69.278180 -> hsa:4485( MST1 , extracellular ) - 3.247723 -> hsa:4486( MST1R , cytoplasm ) - 2.071011 -> hsa:6464( SHC1 , cytoplasm ) - 2.563870 -> hsa:5578( PRKCA , cytoplasm ) - 2.339686 -> hsa:5894( RAF1 , cytoplasm ) - 4.410487 -> hsa:367( AR , nucleus )                                                                                                                                                                                                                                                                                                    | 7  | 13.98516  |
| hsa:12( SERPINA3 , extracellular ) - 69.278180 -> hsa:4485( MST1 , extracellular ) - 3.247723 -> hsa:4486( MST1R , cytoplasm ) - 2.071011 -> hsa:5295( PIK3R1 , cytoplasm ) - 3.776765 -> hsa:1399( CRKL , cytoplasm ) - 5.127839 -> hsa:7454( WAS , cytoplasm ) - 7.217161 -> hsa:1457( CSNK2A1 , cytoplasm ) - 5.390596 -> hsa:1649( DDIT3 , nucleus )                                                                                                                                                                                                                                                  | 8  | 13.729896 |
| hsa:4803( NGFB , extracellular ) - 18.612157 -> hsa:4914( NTRK1 , plasma membrane ) - 8.820974 -> hsa:7314( UBB , nucleus )                                                                                                                                                                                                                                                                                                                                                                                                                                                                               | 3  | 13.716566 |
| hsa:2161( F12 , extracellular ) - 35.283898 -> hsa:3848( KRT1 , cytoplasm ) - 4.935545 -> hsa:7082( TJP1 , cytoplasm ) - 2.467773 -> hsa:5339( PLECL1 , cytoplasm ) - 10.282386 -> hsa:6709( SPTAN1 , cytoplasm ) - 4.935545 -> hsa:10006( AB11 , cytoplasm ) - 5.546739 -> hsa:6654( SOS1 , cytoplasm ) - 37.788059 -> hsa:3265( HRAS , cytoplasm ) - 2.145471 -> hsa:3654( IRAK1 , cytoplasm ) - 30.516340 -> hsa:9618( TRAF4 , nucleus ) - 11.409739 -> hsa:6198( RPS6KB1 , cytoplasm ) - 4.410487 -> hsa:84271( POLDIP3 , nucleus )                                                                   | 12 | 13.611089 |
| hsa:12( SERPINA3 , extracellular ) - 69.278180 -> hsa:4485( MST1 , extracellular ) - 3.247723 -> hsa:4486( MST1R , cytoplasm ) - 2.071011 -> hsa:5295( PIK3R1 , cytoplasm ) - 3.776765 -> hsa:1399( CRKL , cytoplasm ) - 5.127839 -> hsa:7454( WAS , cytoplasm ) - 7.217161 -> hsa:1457( CSNK2A1 , cytoplasm ) - 4.410487 -> hsa:1026( CDKN1A , nucleus )                                                                                                                                                                                                                                                 | 8  | 13.589881 |
| hsa:12( SERPINA3 , extracellular ) - 69.278180 -> hsa:4485( MST1 , extracellular ) - 3.247723 -> hsa:4486( MST1R , cytoplasm ) - 2.071011 -> hsa:5295( PIK3R1 , cytoplasm ) - 3.776765 -> hsa:1399( CRKL , cytoplasm ) - 5.127839 -> hsa:7454( WAS , cytoplasm ) - 7.217161 -> hsa:1457( CSNK2A1 , cytoplasm ) - 4.410487 -> hsa:5241( PGR , nucleus )                                                                                                                                                                                                                                                    | 8  | 13.589881 |
| hsa:12( SERPINA3 , extracellular ) - 69.278180 -> hsa:4485( MST1 , extracellular ) - 3.247723 -> hsa:4486( MST1R , cytoplasm ) - 2.071011 -> hsa:5295( PIK3R1 , cytoplasm ) - 3.776765 -> hsa:2885( GRB2 , cytoplasm ) - 5.127839 -> hsa:7454( WAS , cytoplasm ) - 7.217161 -> hsa:1457( CSNK2A1 , cytoplasm ) - 4.410487 -> hsa:7421( VDR , nucleus )                                                                                                                                                                                                                                                    | 8  | 13.589881 |
| hsa:12( SERPINA3 , extracellular ) - 69.278180 -> hsa:4485( MST1 , extracellular ) - 3.247723 -> hsa:4486( MST1R , cytoplasm ) - 2.071011 -> hsa:5295( PIK3R1 , cytoplasm ) - 3.776765 -> hsa:1399( CRKL , cytoplasm ) - 5.127839 -> hsa:7454( WAS , cytoplasm ) - 7.217161 -> hsa:1457( CSNK2A1 , cytoplasm ) - 4.410487 -> hsa:3181( HNRNPA2B1 , nucleus )                                                                                                                                                                                                                                              | 8  | 13.589881 |
| hsa:12( SERPINA3 , extracellular ) - 69.278180 -> hsa:4485( MST1 , extracellular ) - 3.247723 -> hsa:4486( MST1R , cytoplasm ) - 2.071011 -> hsa:5295( PIK3R1 , cytoplasm ) - 3.776765 -> hsa:1399( CRKL , cytoplasm ) - 5.127839 -> hsa:7454( WAS , cytoplasm ) - 7.217161 -> hsa:1457( CSNK2A1 , cytoplasm ) - 4.410487 -> hsa:140890( SFRS12 , nucleus )                                                                                                                                                                                                                                               | 8  | 13.589881 |
| hsa:12( SERPINA3 , extracellular ) - 69.278180 -> hsa:4485( MST1 , extracellular ) - 3.247723 -> hsa:4486( MST1R , cytoplasm ) - 2.071011 -> hsa:5295( PIK3R1 , cytoplasm ) - 3.776765 -> hsa:2885( GRB2 , cytoplasm ) - 5.127839 -> hsa:7454( WAS , cytoplasm ) - 7.217161 -> hsa:1457( CSNK2A1 , cytoplasm ) - 4.410487 -> hsa:10921( RNPS1 , nucleus )                                                                                                                                                                                                                                                 | 8  | 13.589881 |
| hsa:12( SERPINA3 , extracellular ) - 69.278180 -> hsa:4485( MST1 , extracellular ) - 3.247723 -> hsa:4486( MST1R , cytoplasm ) - 2.071011 -> hsa:5295( PIK3R1 , cytoplasm ) - 3.776765 -> hsa:2885( GRB2 , cytoplasm ) - 5.127839 -> hsa:7454( WAS , cytoplasm ) - 7.217161 -> hsa:1457( CSNK2A1 , cytoplasm ) - 4.211403 -> hsa:1386( ATF2 , nucleus )                                                                                                                                                                                                                                                   | 8  | 13.56144  |
| hsa:2161( F12 , extracellular ) - 35.283898 -> hsa:3848( KRT1 , cytoplasm ) - 4.935545 -> hsa:7082( TJP1 , cytoplasm ) - 2.467773 -> hsa:5339( PLECL1 , cytoplasm ) - 10.282386 -> hsa:6709( SPTAN1 , cytoplasm ) - 4.935545 -> hsa:10006( AB11 , cytoplasm ) - 5.546739 -> hsa:6654( SOS1 , cytoplasm ) - 37.788059 -> hsa:3265( HRAS , cytoplasm ) - 2.145471 -> hsa:3643( INSR , endoplasmic reticulum ) - 3.040261 -> hsa:5335( PLCG1 , cytoplasm ) - 20.265953 -> hsa:58480( RHOU , cytoplasm ) - 22.752059 -> hsa:5058( PAK1 , cytoplasm ) - 7.217161 -> hsa:90( ACVR1 , cytoplasm ) - 17.330023 -> | 14 | 13.383913 |



|                                                                                                                                                                                                                                                                                                                                                                                                                                                                                                                                                                                   |    |           |
|-----------------------------------------------------------------------------------------------------------------------------------------------------------------------------------------------------------------------------------------------------------------------------------------------------------------------------------------------------------------------------------------------------------------------------------------------------------------------------------------------------------------------------------------------------------------------------------|----|-----------|
| hsa:4093( SMAD9 , nucleus )                                                                                                                                                                                                                                                                                                                                                                                                                                                                                                                                                       |    |           |
| hsa:12( SERPINA3 , extracellular ) - 69.278180 -> hsa:4485( MST1 , extracellular ) - 3.247723 -> hsa:4486( MST1R , cytoplasm ) - 2.071011 -> hsa:6464( SHC1 , cytoplasm ) - 3.090081 -> hsa:5921( RASA1 , cytoplasm ) - 15.690244 -> hsa:394( ARHGAP5 , nucleus ) - 2.430268 -> hsa:2185( PTK2B , cytoplasm ) - 2.181806 -> hsa:3716( JAK1 , cytoplasm ) - 9.046825 -> hsa:6773( STAT2 , nucleus )                                                                                                                                                                                | 9  | 13.379517 |
| hsa:12( SERPINA3 , extracellular ) - 69.278180 -> hsa:4485( MST1 , extracellular ) - 3.247723 -> hsa:4486( MST1R , cytoplasm ) - 2.071011 -> hsa:5295( PIK3R1 , cytoplasm ) - 3.776765 -> hsa:1399( CRKL , cytoplasm ) - 5.127839 -> hsa:7454( WAS , cytoplasm ) - 7.217161 -> hsa:1457( CSNK2A1 , cytoplasm ) - 2.520278 -> hsa:405( ARNT , nucleus )                                                                                                                                                                                                                            | 8  | 13.319851 |
| hsa:654( BMP6 , extracellular ) - 65.460916 -> hsa:658( BMPR1B , cytoplasm ) - 2.071011 -> hsa:1123( CHN1 , cytoplasm ) - 33.843739 -> hsa:5879( RAC1 , golgi ) - 2.145471 -> hsa:5578( PRKCA , cytoplasm ) - 5.748303 -> hsa:9463( PICK1 , cytoplasm ) - 2.115234 -> hsa:375( ARF1 , golgi ) - 2.145471 -> hsa:3643( INSR , endoplasmic reticulum ) - 3.041705 -> hsa:2888( GRB14 , cytoplasm ) - 3.230539 -> hsa:80351( TNKS2 , nucleus )                                                                                                                                       | 10 | 13.311377 |
| hsa:2161( F12 , extracellular ) - 35.283898 -> hsa:3848( KRT1 , cytoplasm ) - 4.935545 -> hsa:7082( TJP1 , cytoplasm ) - 2.467773 -> hsa:5339( PLECL1 , cytoplasm ) - 10.282386 -> hsa:6709( SPTAN1 , cytoplasm ) - 4.935545 -> hsa:10006( ABI1 , cytoplasm ) - 5.546739 -> hsa:6654( SOS1 , cytoplasm ) - 37.788059 -> hsa:3265( HRAS , cytoplasm ) - 2.145471 -> hsa:5599( MAPK8 , cytoplasm ) - 16.171787 -> hsa:7157( TP53 , nucleus )                                                                                                                                        | 10 | 13.284134 |
| hsa:2161( F12 , extracellular ) - 35.283898 -> hsa:3848( KRT1 , cytoplasm ) - 4.935545 -> hsa:7082( TJP1 , cytoplasm ) - 2.467773 -> hsa:5339( PLECL1 , cytoplasm ) - 10.282386 -> hsa:6709( SPTAN1 , cytoplasm ) - 4.935545 -> hsa:10006( ABI1 , cytoplasm ) - 5.546739 -> hsa:6654( SOS1 , cytoplasm ) - 37.788059 -> hsa:3265( HRAS , cytoplasm ) - 22.582651 -> hsa:673( BRAF , cytoplasm ) - 3.307865 -> hsa:5594( MAPK1 , cytoplasm ) - 5.390596 -> hsa:4286( MITF , nucleus )                                                                                              | 11 | 13.252106 |
| hsa:2161( F12 , extracellular ) - 35.283898 -> hsa:3848( KRT1 , cytoplasm ) - 4.935545 -> hsa:7082( TJP1 , cytoplasm ) - 2.467773 -> hsa:5339( PLECL1 , cytoplasm ) - 10.282386 -> hsa:6709( SPTAN1 , cytoplasm ) - 4.935545 -> hsa:10006( ABI1 , cytoplasm ) - 5.546739 -> hsa:6654( SOS1 , cytoplasm ) - 37.788059 -> hsa:3265( HRAS , cytoplasm ) - 22.582651 -> hsa:673( BRAF , cytoplasm ) - 3.307865 -> hsa:5594( MAPK1 , cytoplasm ) - 5.390596 -> hsa:389692( MAFA , nucleus )                                                                                            | 11 | 13.252106 |
| hsa:2161( F12 , extracellular ) - 35.283898 -> hsa:3848( KRT1 , cytoplasm ) - 4.935545 -> hsa:7082( TJP1 , cytoplasm ) - 2.467773 -> hsa:5339( PLECL1 , cytoplasm ) - 10.282386 -> hsa:6709( SPTAN1 , cytoplasm ) - 4.935545 -> hsa:10006( ABI1 , cytoplasm ) - 5.546739 -> hsa:6654( SOS1 , cytoplasm ) - 37.788059 -> hsa:3265( HRAS , cytoplasm ) - 22.582651 -> hsa:5894( RAF1 , cytoplasm ) - 2.616758 -> hsa:10256( CNKSR1 , cytoplasm ) - 12.661185 -> hsa:387( RHOA , cytoplasm ) - 2.145471 -> hsa:7046( TGFBR1 , cytoplasm ) - 17.330023 -> hsa:4091( SMAD6 , nucleus ) | 13 | 13.214669 |
| hsa:2161( F12 , extracellular ) - 35.283898 -> hsa:3848( KRT1 , cytoplasm ) - 4.935545 -> hsa:7082( TJP1 , cytoplasm ) - 2.467773 -> hsa:5339( PLECL1 , cytoplasm ) - 10.282386 -> hsa:6709( SPTAN1 , cytoplasm ) - 4.935545 -> hsa:10006( ABI1 , cytoplasm ) - 5.546739 -> hsa:6654( SOS1 , cytoplasm ) - 37.788059 -> hsa:3265( HRAS , cytoplasm ) - 22.582651 -> hsa:5894( RAF1 , cytoplasm ) - 2.616758 -> hsa:10256( CNKSR1 , cytoplasm ) - 12.661185 -> hsa:387( RHOA , cytoplasm ) - 2.145471 -> hsa:7046( TGFBR1 , cytoplasm ) - 17.330023 -> hsa:4089( SMAD4 , nucleus ) | 13 | 13.214669 |
| hsa:2161( F12 , extracellular ) - 35.283898 -> hsa:3848( KRT1 , cytoplasm ) - 4.935545 -> hsa:7082( TJP1 , cytoplasm ) - 2.467773 -> hsa:5339( PLECL1 , cytoplasm ) - 10.282386 -> hsa:6709( SPTAN1 , cytoplasm ) - 4.935545 -> hsa:10006( ABI1 , cytoplasm ) - 5.546739 -> hsa:6654( SOS1 , cytoplasm ) - 37.788059 -> hsa:3265( HRAS , cytoplasm ) - 22.582651 -> hsa:5894( RAF1 , cytoplasm ) - 2.616758 -> hsa:10256( CNKSR1 , cytoplasm ) - 12.661185 -> hsa:387( RHOA , cytoplasm ) - 2.145471 -> hsa:7046( TGFBR1 , cytoplasm ) - 17.330023 -> hsa:4088( SMAD3 , nucleus ) | 13 | 13.214669 |
| hsa:2161( F12 , extracellular ) - 35.283898 -> hsa:3848( KRT1 , cytoplasm ) - 4.935545 -> hsa:7082( TJP1 , cytoplasm ) - 2.467773 -> hsa:5339( PLECL1 , cytoplasm ) - 10.282386 -> hsa:6709( SPTAN1 , cytoplasm ) - 4.935545 -> hsa:10006( ABI1 , cytoplasm ) - 5.546739 -> hsa:6654( SOS1 , cytoplasm ) - 37.788059 -> hsa:3265( HRAS , cytoplasm ) - 22.582651 -> hsa:5894( RAF1 , cytoplasm ) - 2.616758 -> hsa:10256( CNKSR1 , cytoplasm ) - 12.661185 -> hsa:387( RHOA , cytoplasm ) - 2.145471 -> hsa:7046( TGFBR1 , cytoplasm ) - 17.330023 -> hsa:4092( SMAD7 , nucleus ) | 13 | 13.214669 |

|                                                                                                                                                                                                                                                                                                                                                                                                                                                                                                                                              |    |           |
|----------------------------------------------------------------------------------------------------------------------------------------------------------------------------------------------------------------------------------------------------------------------------------------------------------------------------------------------------------------------------------------------------------------------------------------------------------------------------------------------------------------------------------------------|----|-----------|
| hsa:2161(F12, extracellular) - 35.283898 -> hsa:3848(KRT1, cytoplasm) - 4.935545 -> hsa:7082(TJP1, cytoplasm) - 2.467773 -> hsa:5339(PLEC1, cytoplasm) - 10.282386 -> hsa:6709(SPTAN1, cytoplasm) - 4.935545 -> hsa:10006(ABI1, cytoplasm) - 5.546739 -> hsa:6654(SOS1, cytoplasm) - 37.788059 -> hsa:3265(HRAS, cytoplasm) - 22.582651 -> hsa:5894(RAF1, cytoplasm) - 2.616758 -> hsa:10256(CNKSRI, cytoplasm) - 12.661185 -> hsa:387(RHOA, cytoplasm) - 2.145471 -> hsa:7046(TGFBRI, cytoplasm) - 17.330023 -> hsa:4086(SMAD1, nucleus)    | 13 | 13.214669 |
| hsa:2161(F12, extracellular) - 35.283898 -> hsa:3848(KRT1, cytoplasm) - 4.935545 -> hsa:7082(TJP1, cytoplasm) - 2.467773 -> hsa:5339(PLEC1, cytoplasm) - 10.282386 -> hsa:6709(SPTAN1, cytoplasm) - 4.935545 -> hsa:10006(ABI1, cytoplasm) - 5.546739 -> hsa:6654(SOS1, cytoplasm) - 37.788059 -> hsa:3265(HRAS, cytoplasm) - 22.582651 -> hsa:5894(RAF1, cytoplasm) - 2.616758 -> hsa:10256(CNKSRI, cytoplasm) - 12.661185 -> hsa:387(RHOA, cytoplasm) - 2.145471 -> hsa:7046(TGFBRI, cytoplasm) - 17.330023 -> hsa:4087(SMAD2, nucleus)    | 13 | 13.214669 |
| hsa:2161(F12, extracellular) - 35.283898 -> hsa:3848(KRT1, cytoplasm) - 4.935545 -> hsa:7082(TJP1, cytoplasm) - 2.467773 -> hsa:5339(PLEC1, cytoplasm) - 10.282386 -> hsa:6709(SPTAN1, cytoplasm) - 4.935545 -> hsa:10006(ABI1, cytoplasm) - 5.546739 -> hsa:6654(SOS1, cytoplasm) - 37.788059 -> hsa:3265(HRAS, cytoplasm) - 22.582651 -> hsa:673(BRAF, cytoplasm) - 3.307865 -> hsa:5594(MAPK1, cytoplasm) - 4.410487 -> hsa:2099(ESR1, nucleus)                                                                                           | 11 | 13.154095 |
| hsa:2161(F12, extracellular) - 35.283898 -> hsa:3848(KRT1, cytoplasm) - 4.935545 -> hsa:7082(TJP1, cytoplasm) - 2.467773 -> hsa:5339(PLEC1, cytoplasm) - 10.282386 -> hsa:6709(SPTAN1, cytoplasm) - 4.935545 -> hsa:10006(ABI1, cytoplasm) - 5.546739 -> hsa:6654(SOS1, cytoplasm) - 37.788059 -> hsa:3265(HRAS, cytoplasm) - 22.582651 -> hsa:673(BRAF, cytoplasm) - 3.307865 -> hsa:5594(MAPK1, cytoplasm) - 4.410487 -> hsa:2516(NR5A1, nucleus)                                                                                          | 11 | 13.154095 |
| hsa:2161(F12, extracellular) - 35.283898 -> hsa:3848(KRT1, cytoplasm) - 4.935545 -> hsa:7082(TJP1, cytoplasm) - 2.467773 -> hsa:5339(PLEC1, cytoplasm) - 10.282386 -> hsa:6709(SPTAN1, cytoplasm) - 4.935545 -> hsa:10006(ABI1, cytoplasm) - 5.546739 -> hsa:6655(SOS2, cytoplasm) - 37.788059 -> hsa:3265(HRAS, cytoplasm) - 22.582651 -> hsa:5894(RAF1, cytoplasm) - 3.307865 -> hsa:5598(MAPK7, cytoplasm) - 4.410487 -> hsa:6256(RXRA, nucleus)                                                                                          | 11 | 13.154095 |
| hsa:2161(F12, extracellular) - 35.283898 -> hsa:3848(KRT1, cytoplasm) - 4.935545 -> hsa:7082(TJP1, cytoplasm) - 2.467773 -> hsa:5339(PLEC1, cytoplasm) - 10.282386 -> hsa:6709(SPTAN1, cytoplasm) - 4.935545 -> hsa:10006(ABI1, cytoplasm) - 5.546739 -> hsa:6654(SOS1, cytoplasm) - 37.788059 -> hsa:3265(HRAS, cytoplasm) - 22.582651 -> hsa:5894(RAF1, cytoplasm) - 3.307865 -> hsa:5595(MAPK3, nucleus) - 4.410487 -> hsa:5465(PPARA, nucleus)                                                                                           | 11 | 13.154095 |
| hsa:2161(F12, extracellular) - 35.283898 -> hsa:3848(KRT1, cytoplasm) - 4.935545 -> hsa:7082(TJP1, cytoplasm) - 2.467773 -> hsa:5339(PLEC1, cytoplasm) - 10.282386 -> hsa:6709(SPTAN1, cytoplasm) - 4.935545 -> hsa:10006(ABI1, cytoplasm) - 5.546739 -> hsa:6654(SOS1, cytoplasm) - 37.788059 -> hsa:3265(HRAS, cytoplasm) - 22.582651 -> hsa:5894(RAF1, cytoplasm) - 3.307865 -> hsa:5594(MAPK1, cytoplasm) - 4.410487 -> hsa:2908(NR3C1, nucleus)                                                                                         | 11 | 13.154095 |
| hsa:2161(F12, extracellular) - 35.283898 -> hsa:3848(KRT1, cytoplasm) - 4.935545 -> hsa:7082(TJP1, cytoplasm) - 2.467773 -> hsa:5339(PLEC1, cytoplasm) - 10.282386 -> hsa:6709(SPTAN1, cytoplasm) - 4.935545 -> hsa:10006(ABI1, cytoplasm) - 5.546739 -> hsa:6654(SOS1, cytoplasm) - 37.788059 -> hsa:3265(HRAS, cytoplasm) - 2.145471 -> hsa:3654(IRAK1, cytoplasm) - 23.645307 -> hsa:7189(TRAF6, cytoplasm) - 16.323064 -> hsa:84231(TRAF7, cytoplasm) - 5.177529 -> hsa:4215(MAP3K3, cytoplasm) - 8.820974 -> hsa:7316(unknown, nucleus) | 13 | 13.112691 |
| hsa:4851(NOTCH1, extracellular) - 13.109432 -> hsa:5970(RELA, nucleus)                                                                                                                                                                                                                                                                                                                                                                                                                                                                       | 2  | 13.109432 |
| hsa:4853(NOTCH2, extracellular) - 13.109432 -> hsa:3516(RBPJ, nucleus)                                                                                                                                                                                                                                                                                                                                                                                                                                                                       | 2  | 13.109432 |
| hsa:4855(NOTCH4, extracellular) - 13.109432 -> hsa:3516(RBPJ, nucleus)                                                                                                                                                                                                                                                                                                                                                                                                                                                                       | 2  | 13.109432 |
| hsa:4854(NOTCH3, extracellular) - 13.109432 -> hsa:3516(RBPJ, nucleus)                                                                                                                                                                                                                                                                                                                                                                                                                                                                       | 2  | 13.109432 |
| hsa:2161(F12, extracellular) - 35.283898 -> hsa:3848(KRT1, cytoplasm) - 4.935545 -> hsa:7082(TJP1, cytoplasm) - 2.467773 -> hsa:5339(PLEC1, cytoplasm) - 10.282386 -> hsa:6709(SPTAN1, cytoplasm) - 4.935545 -> hsa:10006(ABI1, cytoplasm) - 5.546739 -> hsa:6654(SOS1, cytoplasm) - 37.788059 -> hsa:3265(HRAS, cytoplasm) - 22.582651 -> hsa:5894(RAF1, cytoplasm) - 3.307865 -> hsa:5595(MAPK3, nucleus) - 3.320395 -> hsa:7553(ZNF7, nucleus)                                                                                            | 11 | 13.045086 |
| hsa:2161(F12, extracellular) - 35.283898 -> hsa:3848(KRT1, cytoplasm) - 4.935545 -> hsa:7082(TJP1, cytoplasm)                                                                                                                                                                                                                                                                                                                                                                                                                                | 11 | 13.016267 |

|                                                                                                                                                                                                                                                                                                                                                                                                                                                        |    |           |
|--------------------------------------------------------------------------------------------------------------------------------------------------------------------------------------------------------------------------------------------------------------------------------------------------------------------------------------------------------------------------------------------------------------------------------------------------------|----|-----------|
| - 2.467773 -> hsa:5339( PLEC1 , cytoplasm ) - 10.282386 -> hsa:6709( SPTAN1 , cytoplasm ) - 4.935545 -> hsa:10006( AB11 , cytoplasm ) - 5.546739 -> hsa:6654( SOS1 , cytoplasm ) - 37.788059 -> hsa:3265( HRAS , cytoplasm ) - 22.582651 -> hsa:673( BRAF , cytoplasm ) - 3.307865 -> hsa:5594( MAPK1 , cytoplasm ) - 3.032210 -> hsa:8462( KLF11 , nucleus )                                                                                          |    |           |
| hsa:2161( F12 , extracellular ) - 35.283898 -> hsa:3848( KRT1 , cytoplasm ) - 4.935545 -> hsa:7082( TJP1 , cytoplasm )                                                                                                                                                                                                                                                                                                                                 |    |           |
| - 2.467773 -> hsa:5339( PLEC1 , cytoplasm ) - 10.282386 -> hsa:6709( SPTAN1 , cytoplasm ) - 4.935545 -> hsa:10006( AB11 , cytoplasm ) - 5.546739 -> hsa:6654( SOS1 , cytoplasm ) - 37.788059 -> hsa:3265( HRAS , cytoplasm ) - 22.582651 -> hsa:673( BRAF , cytoplasm ) - 3.307865 -> hsa:5594( MAPK1 , cytoplasm ) - 2.520278 -> hsa:8202( NCOA3 , nucleus )                                                                                          | 11 | 12.965074 |
| hsa:2161( F12 , extracellular ) - 35.283898 -> hsa:3848( KRT1 , cytoplasm ) - 4.935545 -> hsa:7082( TJP1 , cytoplasm )                                                                                                                                                                                                                                                                                                                                 |    |           |
| - 2.467773 -> hsa:5339( PLEC1 , cytoplasm ) - 10.282386 -> hsa:6709( SPTAN1 , cytoplasm ) - 4.935545 -> hsa:10006( AB11 , cytoplasm ) - 5.546739 -> hsa:6654( SOS1 , cytoplasm ) - 37.788059 -> hsa:3265( HRAS , cytoplasm ) - 22.582651 -> hsa:673( BRAF , cytoplasm ) - 3.307865 -> hsa:5594( MAPK1 , cytoplasm ) - 2.520278 -> hsa:8648( NCOA1 , nucleus )                                                                                          | 11 | 12.965074 |
| hsa:2161( F12 , extracellular ) - 35.283898 -> hsa:3848( KRT1 , cytoplasm ) - 4.935545 -> hsa:7082( TJP1 , cytoplasm )                                                                                                                                                                                                                                                                                                                                 |    |           |
| - 2.467773 -> hsa:5339( PLEC1 , cytoplasm ) - 10.282386 -> hsa:6709( SPTAN1 , cytoplasm ) - 4.935545 -> hsa:10006( AB11 , cytoplasm ) - 5.546739 -> hsa:6654( SOS1 , cytoplasm ) - 37.788059 -> hsa:3265( HRAS , cytoplasm ) - 2.145471 -> hsa:5599( MAPK8 , cytoplasm ) - 13.231462 -> hsa:5591( PRKDC , nucleus )                                                                                                                                    | 10 | 12.957431 |
| hsa:2161( F12 , extracellular ) - 35.283898 -> hsa:3848( KRT1 , cytoplasm ) - 4.935545 -> hsa:7082( TJP1 , cytoplasm )                                                                                                                                                                                                                                                                                                                                 |    |           |
| - 2.467773 -> hsa:5339( PLEC1 , cytoplasm ) - 10.282386 -> hsa:6709( SPTAN1 , cytoplasm ) - 4.935545 -> hsa:10006( AB11 , cytoplasm ) - 5.546739 -> hsa:6654( SOS1 , cytoplasm ) - 37.788059 -> hsa:3265( HRAS , cytoplasm ) - 2.145471 -> hsa:3656( IRAK2 , cytoplasm ) - 23.645307 -> hsa:7189( TRAF6 , cytoplasm ) - 6.595756 -> hsa:4215( MAP3K3 , cytoplasm ) - 8.820974 -> hsa:7311( UBA52 , nucleus )                                           | 12 | 12.949768 |
| hsa:2161( F12 , extracellular ) - 35.283898 -> hsa:3848( KRT1 , cytoplasm ) - 4.935545 -> hsa:7082( TJP1 , cytoplasm )                                                                                                                                                                                                                                                                                                                                 |    |           |
| - 2.467773 -> hsa:5339( PLEC1 , cytoplasm ) - 10.282386 -> hsa:6709( SPTAN1 , cytoplasm ) - 4.935545 -> hsa:10006( AB11 , cytoplasm ) - 5.546739 -> hsa:6654( SOS1 , cytoplasm ) - 37.788059 -> hsa:3265( HRAS , cytoplasm ) - 2.145471 -> hsa:3656( IRAK2 , cytoplasm ) - 23.645307 -> hsa:7189( TRAF6 , cytoplasm ) - 6.595756 -> hsa:4215( MAP3K3 , cytoplasm ) - 8.820974 -> hsa:7316( unknown , nucleus )                                         | 12 | 12.949768 |
| hsa:2161( F12 , extracellular ) - 35.283898 -> hsa:3848( KRT1 , cytoplasm ) - 4.935545 -> hsa:7082( TJP1 , cytoplasm )                                                                                                                                                                                                                                                                                                                                 |    |           |
| - 2.467773 -> hsa:5339( PLEC1 , cytoplasm ) - 10.282386 -> hsa:6709( SPTAN1 , cytoplasm ) - 4.935545 -> hsa:10006( AB11 , cytoplasm ) - 5.546739 -> hsa:6654( SOS1 , cytoplasm ) - 37.788059 -> hsa:3265( HRAS , cytoplasm ) - 22.582651 -> hsa:5894( RAF1 , cytoplasm ) - 3.307865 -> hsa:55872( PBK , cytoplasm ) - 2.205244 -> hsa:891( CCNB1 , nucleus )                                                                                           | 11 | 12.933571 |
| hsa:12( SERPINA3 , extracellular ) - 69.278180 -> hsa:4485( MST1 , extracellular ) - 3.247723 -> hsa:4486( MST1R , cytoplasm ) - 2.071011 -> hsa:3717( JAK2 , cytoplasm ) - 2.318839 -> hsa:2885( GRB2 , cytoplasm ) - 17.324771 -> hsa:3265( HRAS , cytoplasm ) - 2.145471 -> hsa:3643( INSR , endoplasmic reticulum ) - 3.041705 -> hsa:2888( GRB14 , cytoplasm ) - 3.230539 -> hsa:80351( TNKS2 , nucleus )                                         | 9  | 12.83228  |
| hsa:2161( F12 , extracellular ) - 35.283898 -> hsa:3848( KRT1 , cytoplasm ) - 4.935545 -> hsa:7082( TJP1 , cytoplasm )                                                                                                                                                                                                                                                                                                                                 |    |           |
| - 2.467773 -> hsa:5339( PLEC1 , cytoplasm ) - 10.282386 -> hsa:6709( SPTAN1 , cytoplasm ) - 4.935545 -> hsa:10006( AB11 , cytoplasm ) - 5.546739 -> hsa:6654( SOS1 , cytoplasm ) - 37.788059 -> hsa:3265( HRAS , cytoplasm ) - 2.145471 -> hsa:3654( IRAK1 , cytoplasm ) - 23.645307 -> hsa:7189( TRAF6 , cytoplasm ) - 6.595756 -> hsa:6885( MAP3K7 , cytoplasm ) - 8.820974 -> hsa:3551( IKBKB , cytoplasm ) - 8.820974 -> hsa:7314( UBB , nucleus ) | 13 | 12.605702 |
| hsa:12( SERPINA3 , extracellular ) - 69.278180 -> hsa:4485( MST1 , extracellular ) - 3.247723 -> hsa:4486( MST1R , cytoplasm ) - 2.071011 -> hsa:6464( SHC1 , cytoplasm ) - 2.563870 -> hsa:5578( PRKCA , cytoplasm ) - 2.339686 -> hsa:5894( RAF1 , cytoplasm ) - 3.307865 -> hsa:5594( MAPK1 , cytoplasm ) - 5.390596 -> hsa:4286( MITF , nucleus )                                                                                                  | 8  | 12.599847 |
| hsa:12( SERPINA3 , extracellular ) - 69.278180 -> hsa:4485( MST1 , extracellular ) - 3.247723 -> hsa:4486( MST1R , cytoplasm ) - 2.071011 -> hsa:6464( SHC1 , cytoplasm ) - 2.563870 -> hsa:5578( PRKCA , cytoplasm ) - 2.339686 -> hsa:5894( RAF1 , cytoplasm ) - 3.307865 -> hsa:5594( MAPK1 , cytoplasm ) - 5.390596 -> hsa:389692( MAFA , nucleus )                                                                                                | 8  | 12.599847 |

|                                                                                                                                                                                                                                                                                                                                                                                                                                                                                                                                                |    |           |
|------------------------------------------------------------------------------------------------------------------------------------------------------------------------------------------------------------------------------------------------------------------------------------------------------------------------------------------------------------------------------------------------------------------------------------------------------------------------------------------------------------------------------------------------|----|-----------|
| hsa:12(SERPINA3, extracellular) - 69.278180 -> hsa:4485(MST1, extracellular) - 3.247723 -> hsa:4486(MST1R, cytoplasm) - 2.071011 -> hsa:6464(SHC1, cytoplasm) - 2.563870 -> hsa:5578(PRKCA, cytoplasm) - 2.339686 -> hsa:5894(RAF1, cytoplasm) - 3.307865 -> hsa:5594(MAPK1, cytoplasm) - 5.390596 -> hsa:3727(JUND, nucleus)                                                                                                                                                                                                                  | 8  | 12.599847 |
| hsa:12(SERPINA3, extracellular) - 69.278180 -> hsa:4485(MST1, extracellular) - 3.247723 -> hsa:4486(MST1R, cytoplasm) - 2.071011 -> hsa:6464(SHC1, cytoplasm) - 2.563870 -> hsa:5578(PRKCA, cytoplasm) - 2.339686 -> hsa:5894(RAF1, cytoplasm) - 3.307865 -> hsa:5594(MAPK1, cytoplasm) - 5.390596 -> hsa:7175(TPR, nucleus)                                                                                                                                                                                                                   | 8  | 12.599847 |
| hsa:2161(F12, extracellular) - 35.283898 -> hsa:3848(KRT1, cytoplasm) - 4.935545 -> hsa:7082(TJP1, cytoplasm) - 2.467773 -> hsa:5339(PLEC1, cytoplasm) - 10.282386 -> hsa:6709(SPTAN1, cytoplasm) - 4.935545 -> hsa:10006(ABI1, cytoplasm) - 5.546739 -> hsa:6654(SOS1, cytoplasm) - 37.788059 -> hsa:3265(HRAS, cytoplasm) - 2.145471 -> hsa:3656(IRAK2, cytoplasm) - 23.645307 -> hsa:7189(TRAF6, cytoplasm) - 6.595756 -> hsa:9020(MAP3K14, cytoplasm) - 4.410487 -> hsa:4670(HNRPM, nucleus)                                               | 12 | 12.548815 |
| hsa:2161(F12, extracellular) - 35.283898 -> hsa:3848(KRT1, cytoplasm) - 4.935545 -> hsa:7082(TJP1, cytoplasm) - 2.467773 -> hsa:5339(PLEC1, cytoplasm) - 10.282386 -> hsa:6709(SPTAN1, cytoplasm) - 4.935545 -> hsa:10006(ABI1, cytoplasm) - 5.546739 -> hsa:6654(SOS1, cytoplasm) - 37.788059 -> hsa:3265(HRAS, cytoplasm) - 2.145471 -> hsa:3656(IRAK2, cytoplasm) - 23.645307 -> hsa:7189(TRAF6, cytoplasm) - 6.595756 -> hsa:9020(MAP3K14, cytoplasm) - 4.410487 -> hsa:6741(SSB, nucleus)                                                 | 12 | 12.548815 |
| hsa:2161(F12, extracellular) - 35.283898 -> hsa:3848(KRT1, cytoplasm) - 4.935545 -> hsa:7082(TJP1, cytoplasm) - 2.467773 -> hsa:5339(PLEC1, cytoplasm) - 10.282386 -> hsa:6709(SPTAN1, cytoplasm) - 4.935545 -> hsa:10006(ABI1, cytoplasm) - 5.546739 -> hsa:6654(SOS1, cytoplasm) - 37.788059 -> hsa:3265(HRAS, cytoplasm) - 2.145471 -> hsa:3643(INSR, endoplasmic reticulum) - 2.649347 -> hsa:7409(VAV1, cytoplasm) - 29.522727 -> hsa:387(RHOA, cytoplasm) - 12.711560 -> hsa:5585(PKN1, cytoplasm) - 2.205244 -> hsa:905(CCNT2, nucleus) | 13 | 12.539524 |
| hsa:2161(F12, extracellular) - 35.283898 -> hsa:3848(KRT1, cytoplasm) - 4.935545 -> hsa:7082(TJP1, cytoplasm) - 2.467773 -> hsa:5339(PLEC1, cytoplasm) - 10.282386 -> hsa:6709(SPTAN1, cytoplasm) - 4.935545 -> hsa:10006(ABI1, cytoplasm) - 5.546739 -> hsa:6654(SOS1, cytoplasm) - 37.788059 -> hsa:3265(HRAS, cytoplasm) - 2.145471 -> hsa:3654(IRAK1, cytoplasm) - 8.820974 -> hsa:7314(UBB, nucleus)                                                                                                                                      | 10 | 12.467377 |
| hsa:12(SERPINA3, extracellular) - 69.278180 -> hsa:4485(MST1, extracellular) - 3.247723 -> hsa:4486(MST1R, cytoplasm) - 2.071011 -> hsa:6464(SHC1, cytoplasm) - 2.563870 -> hsa:5578(PRKCA, cytoplasm) - 2.339686 -> hsa:5894(RAF1, cytoplasm) - 3.307865 -> hsa:5595(MAPK3, nucleus) - 4.410487 -> hsa:2099(ESR1, nucleus)                                                                                                                                                                                                                    | 8  | 12.459832 |
| hsa:12(SERPINA3, extracellular) - 69.278180 -> hsa:4485(MST1, extracellular) - 3.247723 -> hsa:4486(MST1R, cytoplasm) - 2.071011 -> hsa:6464(SHC1, cytoplasm) - 2.563870 -> hsa:5578(PRKCA, cytoplasm) - 2.339686 -> hsa:5894(RAF1, cytoplasm) - 3.307865 -> hsa:5594(MAPK1, cytoplasm) - 4.410487 -> hsa:5468(PPARG, nucleus)                                                                                                                                                                                                                 | 8  | 12.459832 |
| hsa:12(SERPINA3, extracellular) - 69.278180 -> hsa:4485(MST1, extracellular) - 3.247723 -> hsa:4486(MST1R, cytoplasm) - 2.071011 -> hsa:6464(SHC1, cytoplasm) - 2.563870 -> hsa:5578(PRKCA, cytoplasm) - 2.339686 -> hsa:5894(RAF1, cytoplasm) - 3.307865 -> hsa:5594(MAPK1, cytoplasm) - 4.410487 -> hsa:2516(NR5A1, nucleus)                                                                                                                                                                                                                 | 8  | 12.459832 |
| hsa:12(SERPINA3, extracellular) - 69.278180 -> hsa:4485(MST1, extracellular) - 3.247723 -> hsa:4486(MST1R, cytoplasm) - 2.071011 -> hsa:6464(SHC1, cytoplasm) - 2.563870 -> hsa:5578(PRKCA, cytoplasm) - 2.339686 -> hsa:5894(RAF1, cytoplasm) - 3.307865 -> hsa:5594(MAPK1, cytoplasm) - 4.410487 -> hsa:3164(NR4A1, nucleus)                                                                                                                                                                                                                 | 8  | 12.459832 |
| hsa:2161(F12, extracellular) - 35.283898 -> hsa:3848(KRT1, cytoplasm) - 4.935545 -> hsa:7082(TJP1, cytoplasm) - 2.467773 -> hsa:5339(PLEC1, cytoplasm) - 10.282386 -> hsa:6709(SPTAN1, cytoplasm) - 4.935545 -> hsa:10006(ABI1, cytoplasm) - 5.546739 -> hsa:6654(SOS1, cytoplasm) - 37.788059 -> hsa:3265(HRAS, cytoplasm) - 2.145471 -> hsa:3656(IRAK2, cytoplasm) - 23.645307 -> hsa:7189(TRAF6, cytoplasm) - 6.595756 -> hsa:4215(MAP3K3, cytoplasm) - 3.032210 -> hsa:26993(AKAP8L, nucleus)                                              | 12 | 12.423517 |
| hsa:12(SERPINA3, extracellular) - 69.278180 -> hsa:4485(MST1, extracellular) - 3.247723 -> hsa:4486(MST1R, cytoplasm) - 2.071011 -> hsa:6464(SHC1, cytoplasm) - 2.563870 -> hsa:5578(PRKCA, cytoplasm) - 2.339686 ->                                                                                                                                                                                                                                                                                                                           | 8  | 12.304104 |

|                                                                                                                                                                                                                                                                                                                                                                                                                                                                                                                                                                                                                                          |    |           |
|------------------------------------------------------------------------------------------------------------------------------------------------------------------------------------------------------------------------------------------------------------------------------------------------------------------------------------------------------------------------------------------------------------------------------------------------------------------------------------------------------------------------------------------------------------------------------------------------------------------------------------------|----|-----------|
| hsa:5894( RAF1 , cytoplasm ) - 3.307865 -> hsa:5595( MAPK3 , nucleus ) - 3.320395 -> hsa:7553( ZNF7 , nucleus )                                                                                                                                                                                                                                                                                                                                                                                                                                                                                                                          |    |           |
| hsa:12( SERPINA3 , extracellular ) - 69.278180 -> hsa:4485( MST1 , extracellular ) - 3.247723 -> hsa:4486( MST1R , cytoplasm ) - 2.071011 -> hsa:5295( PIK3R1 , cytoplasm ) - 3.776765 -> hsa:1399( CRKL , cytoplasm ) - 5.127839 -> hsa:7454( WAS , cytoplasm ) - 7.217161 -> hsa:1457( CSNK2A1 , cytoplasm ) - 3.032210 -> hsa:6667( SPI , nucleus ) - 4.506367 -> hsa:1958( EGRI , nucleus )                                                                                                                                                                                                                                          | 9  | 12.282157 |
| hsa:12( SERPINA3 , extracellular ) - 69.278180 -> hsa:4485( MST1 , extracellular ) - 3.247723 -> hsa:4486( MST1R , cytoplasm ) - 2.071011 -> hsa:6464( SHC1 , cytoplasm ) - 2.563870 -> hsa:5578( PRKCA , cytoplasm ) - 2.339686 -> hsa:5894( RAF1 , cytoplasm ) - 3.307865 -> hsa:5594( MAPK1 , cytoplasm ) - 3.032210 -> hsa:8462( KLF11 , nucleus )                                                                                                                                                                                                                                                                                   | 8  | 12.262935 |
| hsa:2161( F12 , extracellular ) - 35.283898 -> hsa:3848( KRT1 , cytoplasm ) - 4.935545 -> hsa:7082( TJP1 , cytoplasm ) - 2.467773 -> hsa:5339( PLECL1 , cytoplasm ) - 10.282386 -> hsa:6709( SPTAN1 , cytoplasm ) - 4.935545 -> hsa:10006( ABII , cytoplasm ) - 5.546739 -> hsa:6654( SOS1 , cytoplasm ) - 37.788059 -> hsa:3265( HRAS , cytoplasm ) - 22.582651 -> hsa:5894( RAF1 , cytoplasm ) - 3.307865 -> hsa:5595( MAPK3 , nucleus ) - 3.032210 -> hsa:6667( SPI , nucleus ) - 4.506367 -> hsa:1958( EGRI , nucleus )                                                                                                              | 12 | 12.24264  |
| hsa:2161( F12 , extracellular ) - 35.283898 -> hsa:3848( KRT1 , cytoplasm ) - 4.935545 -> hsa:7082( TJP1 , cytoplasm ) - 2.467773 -> hsa:5339( PLECL1 , cytoplasm ) - 10.282386 -> hsa:6709( SPTAN1 , cytoplasm ) - 4.935545 -> hsa:10006( ABII , cytoplasm ) - 5.546739 -> hsa:6654( SOS1 , cytoplasm ) - 37.788059 -> hsa:3265( HRAS , cytoplasm ) - 2.145471 -> hsa:3643( INSR , endoplasmic reticulum ) - 3.040261 -> hsa:5335( PLCG1 , cytoplasm ) - 20.265953 -> hsa:58480( RHOU , cytoplasm ) - 22.752059 -> hsa:5058( PAK1 , cytoplasm ) - 7.217161 -> hsa:984( CDC2L1 , cytoplasm ) - 2.205244 -> hsa:81669( CCNL2 , nucleus )  | 14 | 12.220469 |
| hsa:12( SERPINA3 , extracellular ) - 69.278180 -> hsa:4485( MST1 , extracellular ) - 3.247723 -> hsa:4486( MST1R , cytoplasm ) - 2.071011 -> hsa:6464( SHC1 , cytoplasm ) - 2.563870 -> hsa:5578( PRKCA , cytoplasm ) - 2.339686 -> hsa:5894( RAF1 , cytoplasm ) - 3.307865 -> hsa:5594( MAPK1 , cytoplasm ) - 2.520278 -> hsa:8648( NCOA1 , nucleus )                                                                                                                                                                                                                                                                                   | 8  | 12.189802 |
| hsa:2161( F12 , extracellular ) - 35.283898 -> hsa:3848( KRT1 , cytoplasm ) - 4.935545 -> hsa:7082( TJP1 , cytoplasm ) - 2.467773 -> hsa:5339( PLECL1 , cytoplasm ) - 10.282386 -> hsa:6709( SPTAN1 , cytoplasm ) - 4.935545 -> hsa:10006( ABII , cytoplasm ) - 5.546739 -> hsa:6654( SOS1 , cytoplasm ) - 37.788059 -> hsa:3265( HRAS , cytoplasm ) - 2.145471 -> hsa:3643( INSR , endoplasmic reticulum ) - 2.816469 -> hsa:5295( PIK3R1 , cytoplasm ) - 12.016980 -> hsa:392( ARHGAP1 , cytoplasm ) - 33.843739 -> hsa:998( CDC42 , cytoplasm ) - 2.145471 -> hsa:5601( MAPK9 , cytoplasm ) - 4.211403 -> hsa:11016( ATF7 , nucleus ) | 14 | 12.186114 |
| hsa:2161( F12 , extracellular ) - 35.283898 -> hsa:3848( KRT1 , cytoplasm ) - 4.935545 -> hsa:7082( TJP1 , cytoplasm ) - 2.467773 -> hsa:5339( PLECL1 , cytoplasm ) - 10.282386 -> hsa:6709( SPTAN1 , cytoplasm ) - 4.935545 -> hsa:10006( ABII , cytoplasm ) - 5.546739 -> hsa:6654( SOS1 , cytoplasm ) - 37.788059 -> hsa:6237( RRAS , cytoplasm ) - 2.145471 -> hsa:2048( EPHE2 , cytoplasm ) - 2.210683 -> hsa:25( ABL129892 , cytoplasm ) - 16.171787 -> hsa:7157( TP53 , nucleus )                                                                                                                                                 | 11 | 12.176789 |
| hsa:2161( F12 , extracellular ) - 35.283898 -> hsa:3848( KRT1 , cytoplasm ) - 4.935545 -> hsa:7082( TJP1 , cytoplasm ) - 2.467773 -> hsa:5339( PLECL1 , cytoplasm ) - 10.282386 -> hsa:6709( SPTAN1 , cytoplasm ) - 4.935545 -> hsa:10006( ABII , cytoplasm ) - 5.546739 -> hsa:6654( SOS1 , cytoplasm ) - 37.788059 -> hsa:6237( RRAS , cytoplasm ) - 2.145471 -> hsa:2048( EPHE2 , cytoplasm ) - 2.210683 -> hsa:25( ABL129892 , cytoplasm ) - 16.171787 -> hsa:7161( TP73 , nucleus )                                                                                                                                                 | 11 | 12.176789 |
| hsa:2161( F12 , extracellular ) - 35.283898 -> hsa:3848( KRT1 , cytoplasm ) - 4.935545 -> hsa:7082( TJP1 , cytoplasm ) - 2.467773 -> hsa:5339( PLECL1 , cytoplasm ) - 10.282386 -> hsa:6709( SPTAN1 , cytoplasm ) - 4.935545 -> hsa:10006( ABII , cytoplasm ) - 5.546739 -> hsa:6654( SOS1 , cytoplasm ) - 37.788059 -> hsa:3265( HRAS , cytoplasm ) - 2.145471 -> hsa:5599( MAPK8 , cytoplasm ) - 5.390596 -> hsa:122953( JDP2 , nucleus )                                                                                                                                                                                              | 10 | 12.086224 |
| hsa:2161( F12 , extracellular ) - 35.283898 -> hsa:3848( KRT1 , cytoplasm ) - 4.935545 -> hsa:7082( TJP1 , cytoplasm ) - 2.467773 -> hsa:5339( PLECL1 , cytoplasm ) - 10.282386 -> hsa:6709( SPTAN1 , cytoplasm ) - 4.935545 -> hsa:10006( ABII , cytoplasm ) - 5.546739 -> hsa:6654( SOS1 , cytoplasm ) - 37.788059 -> hsa:3265( HRAS , cytoplasm ) - 2.145471 -> hsa:5599( MAPK8 , cytoplasm ) - 5.390596 -> hsa:3726( JUNB , nucleus )                                                                                                                                                                                                | 10 | 12.086224 |

|                                                                                                                                                                                                                                                                                                                                                                                                                                                                                                                                                                                      |    |           |
|--------------------------------------------------------------------------------------------------------------------------------------------------------------------------------------------------------------------------------------------------------------------------------------------------------------------------------------------------------------------------------------------------------------------------------------------------------------------------------------------------------------------------------------------------------------------------------------|----|-----------|
| hsa:2161(F12, extracellular) - 35.283898 -> hsa:3848(KRT1, cytoplasm) - 4.935545 -> hsa:7082(TJP1, cytoplasm) - 2.467773 -> hsa:5339(PLECL1, cytoplasm) - 10.282386 -> hsa:6709(SPTAN1, cytoplasm) - 4.935545 -> hsa:10006(ABI1, cytoplasm) - 5.546739 -> hsa:6654(SOS1, cytoplasm) - 37.788059 -> hsa:3265(HRAS, cytoplasm) - 2.145471 -> hsa:5599(MAPK8, cytoplasm) - 5.390596 -> hsa:3727(JUND, nucleus)                                                                                                                                                                          | 10 | 12.086224 |
| hsa:2161(F12, extracellular) - 35.283898 -> hsa:3848(KRT1, cytoplasm) - 4.935545 -> hsa:7082(TJP1, cytoplasm) - 2.467773 -> hsa:5339(PLECL1, cytoplasm) - 10.282386 -> hsa:6709(SPTAN1, cytoplasm) - 4.935545 -> hsa:10006(ABI1, cytoplasm) - 5.546739 -> hsa:6654(SOS1, cytoplasm) - 37.788059 -> hsa:6237(RRAS, cytoplasm) - 2.145471 -> hsa:2048(EPHB2, cytoplasm) - 5.390596 -> hsa:2353(FOS, nucleus)                                                                                                                                                                           | 10 | 12.086224 |
| hsa:2161(F12, extracellular) - 35.283898 -> hsa:3848(KRT1, cytoplasm) - 4.935545 -> hsa:7082(TJP1, cytoplasm) - 2.467773 -> hsa:5339(PLECL1, cytoplasm) - 10.282386 -> hsa:6709(SPTAN1, cytoplasm) - 4.935545 -> hsa:10006(ABI1, cytoplasm) - 5.546739 -> hsa:6654(SOS1, cytoplasm) - 37.788059 -> hsa:3265(HRAS, cytoplasm) - 2.145471 -> hsa:5599(MAPK8, cytoplasm) - 5.390596 -> hsa:3725(JUN, nucleus)                                                                                                                                                                           | 10 | 12.086224 |
| hsa:2161(F12, extracellular) - 35.283898 -> hsa:3848(KRT1, cytoplasm) - 4.935545 -> hsa:7082(TJP1, cytoplasm) - 2.467773 -> hsa:5339(PLECL1, cytoplasm) - 10.282386 -> hsa:6709(SPTAN1, cytoplasm) - 4.935545 -> hsa:10006(ABI1, cytoplasm) - 5.546739 -> hsa:6654(SOS1, cytoplasm) - 37.788059 -> hsa:3265(HRAS, cytoplasm) - 22.582651 -> hsa:5894(RAF1, cytoplasm) - 2.616758 -> hsa:10256(CNKSRI, cytoplasm) - 12.661185 -> hsa:387(RHOA, cytoplasm) - 2.145471 -> hsa:7046(TGFBRI, cytoplasm) - 3.608580 -> hsa:3987(LIMS1, nucleus)                                            | 13 | 12.071216 |
| hsa:2161(F12, extracellular) - 35.283898 -> hsa:3848(KRT1, cytoplasm) - 4.935545 -> hsa:7082(TJP1, cytoplasm) - 2.467773 -> hsa:5339(PLECL1, cytoplasm) - 10.282386 -> hsa:6709(SPTAN1, cytoplasm) - 4.935545 -> hsa:10006(ABI1, cytoplasm) - 5.546739 -> hsa:6654(SOS1, cytoplasm) - 37.788059 -> hsa:3265(HRAS, cytoplasm) - 2.145471 -> hsa:3656(IRAK2, cytoplasm) - 23.645307 -> hsa:7189(TRAF6, cytoplasm) - 16.323064 -> hsa:84231(TRAF7, cytoplasm) - 5.177529 -> hsa:4215(MAP3K3, cytoplasm) - 3.320395 -> hsa:7704(ZBTB16, nucleus) - 4.506367 -> hsa:5987(TRIM27, nucleus) | 14 | 12.027544 |
| hsa:2161(F12, extracellular) - 35.283898 -> hsa:3848(KRT1, cytoplasm) - 4.935545 -> hsa:7082(TJP1, cytoplasm) - 2.467773 -> hsa:5339(PLECL1, cytoplasm) - 10.282386 -> hsa:6709(SPTAN1, cytoplasm) - 4.935545 -> hsa:10006(ABI1, cytoplasm) - 5.546739 -> hsa:6654(SOS1, cytoplasm) - 37.788059 -> hsa:3265(HRAS, cytoplasm) - 2.145471 -> hsa:5599(MAPK8, cytoplasm) - 4.410487 -> hsa:1026(CDKN1A, nucleus)                                                                                                                                                                        | 10 | 11.977323 |
| hsa:2161(F12, extracellular) - 35.283898 -> hsa:3848(KRT1, cytoplasm) - 4.935545 -> hsa:7082(TJP1, cytoplasm) - 2.467773 -> hsa:5339(PLECL1, cytoplasm) - 10.282386 -> hsa:6709(SPTAN1, cytoplasm) - 4.935545 -> hsa:10006(ABI1, cytoplasm) - 5.546739 -> hsa:6654(SOS1, cytoplasm) - 37.788059 -> hsa:3265(HRAS, cytoplasm) - 2.145471 -> hsa:5599(MAPK8, cytoplasm) - 4.410487 -> hsa:5468(PPARG, nucleus)                                                                                                                                                                         | 10 | 11.977323 |
| hsa:2161(F12, extracellular) - 35.283898 -> hsa:3848(KRT1, cytoplasm) - 4.935545 -> hsa:7082(TJP1, cytoplasm) - 2.467773 -> hsa:5339(PLECL1, cytoplasm) - 10.282386 -> hsa:6709(SPTAN1, cytoplasm) - 4.935545 -> hsa:10006(ABI1, cytoplasm) - 5.546739 -> hsa:6654(SOS1, cytoplasm) - 37.788059 -> hsa:3265(HRAS, cytoplasm) - 2.145471 -> hsa:5590(PRKCZ, cytoplasm) - 4.410487 -> hsa:4691(NCL, nucleus)                                                                                                                                                                           | 10 | 11.977323 |
| hsa:2161(F12, extracellular) - 35.283898 -> hsa:3848(KRT1, cytoplasm) - 4.935545 -> hsa:7082(TJP1, cytoplasm) - 2.467773 -> hsa:5339(PLECL1, cytoplasm) - 10.282386 -> hsa:6709(SPTAN1, cytoplasm) - 4.935545 -> hsa:10006(ABI1, cytoplasm) - 5.546739 -> hsa:6654(SOS1, cytoplasm) - 37.788059 -> hsa:3265(HRAS, cytoplasm) - 2.145471 -> hsa:3643(INSR, endoplasmic reticulum) - 4.410487 -> hsa:10492(SYNCRIP, nucleus)                                                                                                                                                           | 10 | 11.977323 |
| hsa:2161(F12, extracellular) - 35.283898 -> hsa:3848(KRT1, cytoplasm) - 4.935545 -> hsa:7082(TJP1, cytoplasm) - 2.467773 -> hsa:5339(PLECL1, cytoplasm) - 10.282386 -> hsa:6709(SPTAN1, cytoplasm) - 4.935545 -> hsa:10006(ABI1, cytoplasm) - 5.546739 -> hsa:6654(SOS1, cytoplasm) - 37.788059 -> hsa:3265(HRAS, cytoplasm) - 2.145471 -> hsa:5599(MAPK8, cytoplasm) - 4.410487 -> hsa:2908(NR3C1, nucleus)                                                                                                                                                                         | 10 | 11.977323 |
| hsa:2161(F12, extracellular) - 35.283898 -> hsa:3848(KRT1, cytoplasm) - 4.935545 -> hsa:7082(TJP1, cytoplasm)                                                                                                                                                                                                                                                                                                                                                                                                                                                                        | 10 | 11.955202 |

|                                                                                                                                                                                                                                                                                                                                                                                                                                                                                                                                                                                               |    |           |
|-----------------------------------------------------------------------------------------------------------------------------------------------------------------------------------------------------------------------------------------------------------------------------------------------------------------------------------------------------------------------------------------------------------------------------------------------------------------------------------------------------------------------------------------------------------------------------------------------|----|-----------|
| - 2.467773 -> hsa:5339( PLEC1 , cytoplasm ) - 10.282386 -> hsa:6709( SPTAN1 , cytoplasm ) - 4.935545 -> hsa:10006( ABI1 , cytoplasm ) - 5.546739 -> hsa:6654( SOS1 , cytoplasm ) - 37.788059 -> hsa:3265( HRAS , cytoplasm ) - 2.145471 -> hsa:5599( MAPK8 , cytoplasm ) - 4.211403 -> hsa:1386( ATF2 , nucleus )                                                                                                                                                                                                                                                                             |    |           |
| hsa:2161( F12 , extracellular ) - 35.283898 -> hsa:3848( KRT1 , cytoplasm ) - 4.935545 -> hsa:7082( TJP1 , cytoplasm ) - 2.467773 -> hsa:5339( PLEC1 , cytoplasm ) - 10.282386 -> hsa:6709( SPTAN1 , cytoplasm ) - 4.935545 -> hsa:10006( ABI1 , cytoplasm ) - 5.546739 -> hsa:6654( SOS1 , cytoplasm ) - 37.788059 -> hsa:3265( HRAS , cytoplasm ) - 2.145471 -> hsa:3643( INSR , endoplasmic reticulum ) - 2.649347 -> hsa:7409( VAV1 , cytoplasm ) - 29.522727 -> hsa:387( RHOA , cytoplasm ) - 2.145471 -> hsa:5566( PRKACA730418 , cytoplasm ) - 4.410487 -> hsa:5725( PTBP1 , nucleus ) | 13 | 11.842787 |
| hsa:2161( F12 , extracellular ) - 35.283898 -> hsa:3848( KRT1 , cytoplasm ) - 4.935545 -> hsa:7082( TJP1 , cytoplasm ) - 2.467773 -> hsa:5339( PLEC1 , cytoplasm ) - 10.282386 -> hsa:6709( SPTAN1 , cytoplasm ) - 4.935545 -> hsa:10006( ABI1 , cytoplasm ) - 5.546739 -> hsa:6655( SOS2 , cytoplasm ) - 37.788059 -> hsa:3265( HRAS , cytoplasm ) - 2.145471 -> hsa:3643( INSR , endoplasmic reticulum ) - 3.040261 -> hsa:5335( PLCG1 , cytoplasm ) - 20.265953 -> hsa:387( RHOA , cytoplasm ) - 12.711560 -> hsa:5585( PKN1 , cytoplasm ) - 2.205244 -> hsa:905( CCNT2 , nucleus )        | 13 | 11.800703 |
| hsa:2161( F12 , extracellular ) - 35.283898 -> hsa:3848( KRT1 , cytoplasm ) - 4.935545 -> hsa:7082( TJP1 , cytoplasm ) - 2.467773 -> hsa:5339( PLEC1 , cytoplasm ) - 10.282386 -> hsa:6709( SPTAN1 , cytoplasm ) - 4.935545 -> hsa:10006( ABI1 , cytoplasm ) - 5.546739 -> hsa:6654( SOS1 , cytoplasm ) - 37.788059 -> hsa:3265( HRAS , cytoplasm ) - 2.145471 -> hsa:3656( IRAK2 , cytoplasm ) - 23.645307 -> hsa:7189( TRAF6 , cytoplasm ) - 6.595756 -> hsa:4215( MAP3K3 , cytoplasm ) - 3.320395 -> hsa:7704( ZBTB16 , nucleus ) - 4.506367 -> hsa:5987( TRIM27 , nucleus )               | 13 | 11.78777  |
| hsa:2161( F12 , extracellular ) - 35.283898 -> hsa:3848( KRT1 , cytoplasm ) - 4.935545 -> hsa:7082( TJP1 , cytoplasm ) - 2.467773 -> hsa:5339( PLEC1 , cytoplasm ) - 10.282386 -> hsa:6709( SPTAN1 , cytoplasm ) - 4.935545 -> hsa:10006( ABI1 , cytoplasm ) - 5.546739 -> hsa:6654( SOS1 , cytoplasm ) - 37.788059 -> hsa:3265( HRAS , cytoplasm ) - 2.145471 -> hsa:5590( PRKCZ , cytoplasm ) - 2.205244 -> hsa:5970( RELA , nucleus )                                                                                                                                                      | 10 | 11.732296 |
| hsa:2161( F12 , extracellular ) - 35.283898 -> hsa:3848( KRT1 , cytoplasm ) - 4.935545 -> hsa:7082( TJP1 , cytoplasm ) - 2.467773 -> hsa:5339( PLEC1 , cytoplasm ) - 10.282386 -> hsa:6709( SPTAN1 , cytoplasm ) - 4.935545 -> hsa:10006( ABI1 , cytoplasm ) - 5.546739 -> hsa:6654( SOS1 , cytoplasm ) - 37.788059 -> hsa:3265( HRAS , cytoplasm ) - 2.145471 -> hsa:5599( MAPK8 , cytoplasm ) - 2.205244 -> hsa:5966( REL , nucleus )                                                                                                                                                       | 10 | 11.732296 |
| hsa:2161( F12 , extracellular ) - 35.283898 -> hsa:3848( KRT1 , cytoplasm ) - 4.935545 -> hsa:7082( TJP1 , cytoplasm ) - 2.467773 -> hsa:5339( PLEC1 , cytoplasm ) - 10.282386 -> hsa:6709( SPTAN1 , cytoplasm ) - 4.935545 -> hsa:10006( ABI1 , cytoplasm ) - 5.546739 -> hsa:6654( SOS1 , cytoplasm ) - 37.788059 -> hsa:3265( HRAS , cytoplasm ) - 2.145471 -> hsa:5590( PRKCZ , cytoplasm ) - 2.205244 -> hsa:4773( NFATC2 , nucleus )                                                                                                                                                    | 10 | 11.732296 |
| hsa:2161( F12 , extracellular ) - 35.283898 -> hsa:3848( KRT1 , cytoplasm ) - 4.935545 -> hsa:7082( TJP1 , cytoplasm ) - 2.467773 -> hsa:5339( PLEC1 , cytoplasm ) - 10.282386 -> hsa:6709( SPTAN1 , cytoplasm ) - 4.935545 -> hsa:10006( ABI1 , cytoplasm ) - 5.546739 -> hsa:6654( SOS1 , cytoplasm ) - 37.788059 -> hsa:3265( HRAS , cytoplasm ) - 2.145471 -> hsa:3643( INSR , endoplasmic reticulum ) - 2.649347 -> hsa:7409( VAV1 , cytoplasm ) - 29.522727 -> hsa:387( RHOA , cytoplasm ) - 2.145471 -> hsa:5566( PRKACA730418 , cytoplasm ) - 2.205244 -> hsa:595( CCND1 , nucleus )  | 13 | 11.659017 |
| hsa:2161( F12 , extracellular ) - 35.283898 -> hsa:3848( KRT1 , cytoplasm ) - 4.935545 -> hsa:7082( TJP1 , cytoplasm ) - 2.467773 -> hsa:5339( PLEC1 , cytoplasm ) - 10.282386 -> hsa:6709( SPTAN1 , cytoplasm ) - 4.935545 -> hsa:10006( ABI1 , cytoplasm ) - 5.546739 -> hsa:6654( SOS1 , cytoplasm ) - 37.788059 -> hsa:3265( HRAS , cytoplasm ) - 2.145471 -> hsa:3643( INSR , endoplasmic reticulum ) - 2.649347 -> hsa:7409( VAV1 , cytoplasm ) - 29.522727 -> hsa:998( CDC42 , cytoplasm ) - 2.145471 -> hsa:5601( MAPK9 , cytoplasm ) - 2.205244 -> hsa:4775( NFATC3 , nucleus )      | 13 | 11.659017 |
| hsa:2161( F12 , extracellular ) - 35.283898 -> hsa:3848( KRT1 , cytoplasm ) - 4.935545 -> hsa:7082( TJP1 , cytoplasm ) - 2.467773 -> hsa:5339( PLEC1 , cytoplasm ) - 10.282386 -> hsa:6709( SPTAN1 , cytoplasm ) - 4.935545 -> hsa:10006( ABI1 , cytoplasm ) - 5.546739 -> hsa:6654( SOS1 , cytoplasm ) - 37.788059 -> hsa:3265( HRAS , cytoplasm ) - 2.145471 -> hsa:3654( IRAK1 , cytoplasm ) - 2.306968 -> hsa:695( BTK , cytoplasm ) - 4.410487 -> hsa:2130( EWSR1 , nucleus )                                                                                                            | 12 | 11.648031 |

|                                                                                                                                                                                                                                                                                                                                                                                                                                                                                                                                                                                                                          |    |           |
|--------------------------------------------------------------------------------------------------------------------------------------------------------------------------------------------------------------------------------------------------------------------------------------------------------------------------------------------------------------------------------------------------------------------------------------------------------------------------------------------------------------------------------------------------------------------------------------------------------------------------|----|-----------|
| - 18.025470 -> hsa:6297( SALL2 , nucleus )                                                                                                                                                                                                                                                                                                                                                                                                                                                                                                                                                                               |    |           |
| hsa:2161( F12 , extracellular ) - 35.283898 -> hsa:3848( KRT1 , cytoplasm ) - 4.935545 -> hsa:7082( TJP1 , cytoplasm )<br>- 2.467773 -> hsa:5339( PLECL1 , cytoplasm ) - 10.282386 -> hsa:6709( SPTAN1 , cytoplasm ) - 4.935545 -> hsa:10006( ABI1 , cytoplasm ) - 5.546739 -> hsa:6654( SOS1 , cytoplasm ) - 37.788059 -> hsa:3265( HRAS , cytoplasm ) - 22.582651 -> hsa:5894( RAF1 , cytoplasm ) - 3.307865 -> hsa:5595( MAPK3 , nucleus ) - 2.071011 -> hsa:6850( SYK , cytoplasm ) - 2.565010 -> hsa:5587( PRKDI , cytoplasm ) - 5.390596 -> hsa:3725( JUN , nucleus )                                              | 13 | 11.429757 |
| hsa:2161( F12 , extracellular ) - 35.283898 -> hsa:3848( KRT1 , cytoplasm ) - 4.935545 -> hsa:7082( TJP1 , cytoplasm )<br>- 2.467773 -> hsa:5339( PLECL1 , cytoplasm ) - 10.282386 -> hsa:6709( SPTAN1 , cytoplasm ) - 4.935545 -> hsa:10006( ABI1 , cytoplasm ) - 5.546739 -> hsa:6654( SOS1 , cytoplasm ) - 37.788059 -> hsa:3265( HRAS , cytoplasm ) - 3.310522 -> hsa:5584( PRKCI , cytoplasm ) - 3.275625 -> hsa:1147( CHUK , cytoplasm ) - 4.410487 -> hsa:7182( NR2C2 , nucleus )                                                                                                                                 | 11 | 11.223658 |
| hsa:2161( F12 , extracellular ) - 35.283898 -> hsa:3848( KRT1 , cytoplasm ) - 4.935545 -> hsa:7082( TJP1 , cytoplasm )<br>- 2.467773 -> hsa:5339( PLECL1 , cytoplasm ) - 10.282386 -> hsa:6709( SPTAN1 , cytoplasm ) - 4.935545 -> hsa:10006( ABI1 , cytoplasm ) - 5.546739 -> hsa:6654( SOS1 , cytoplasm ) - 37.788059 -> hsa:6237( RRAS , cytoplasm ) - 2.145471 -> hsa:2048( EPHB2 , cytoplasm ) - 2.210683 -> hsa:6714( SRC , cytoplasm ) - 6.482107 -> hsa:6772( STAT1 , nucleus )                                                                                                                                  | 11 | 11.207821 |
| hsa:2161( F12 , extracellular ) - 35.283898 -> hsa:3848( KRT1 , cytoplasm ) - 4.935545 -> hsa:7082( TJP1 , cytoplasm )<br>- 2.467773 -> hsa:5339( PLECL1 , cytoplasm ) - 10.282386 -> hsa:6709( SPTAN1 , cytoplasm ) - 4.935545 -> hsa:10006( ABI1 , cytoplasm ) - 5.546739 -> hsa:6654( SOS1 , cytoplasm ) - 37.788059 -> hsa:6237( RRAS , cytoplasm ) - 2.145471 -> hsa:2048( EPHB2 , cytoplasm ) - 2.210683 -> hsa:6714( SRC , cytoplasm ) - 6.482107 -> hsa:6778( STAT6 , nucleus )                                                                                                                                  | 11 | 11.207821 |
| hsa:2161( F12 , extracellular ) - 35.283898 -> hsa:3848( KRT1 , cytoplasm ) - 4.935545 -> hsa:7082( TJP1 , cytoplasm )<br>- 2.467773 -> hsa:5339( PLECL1 , cytoplasm ) - 10.282386 -> hsa:6709( SPTAN1 , cytoplasm ) - 4.935545 -> hsa:10006( ABI1 , cytoplasm ) - 5.546739 -> hsa:6654( SOS1 , cytoplasm ) - 37.788059 -> hsa:3265( HRAS , cytoplasm ) - 2.145471 -> hsa:3654( IRAK1 , cytoplasm ) - 2.071011 -> hsa:6774( STAT3 , nucleus ) - 5.627464 -> hsa:7707( ZNF148 , nucleus )                                                                                                                                 | 11 | 11.108389 |
| hsa:2161( F12 , extracellular ) - 35.283898 -> hsa:3848( KRT1 , cytoplasm ) - 4.935545 -> hsa:7082( TJP1 , cytoplasm )<br>- 2.467773 -> hsa:5339( PLECL1 , cytoplasm ) - 10.282386 -> hsa:6709( SPTAN1 , cytoplasm ) - 4.935545 -> hsa:10006( ABI1 , cytoplasm ) - 5.546739 -> hsa:6654( SOS1 , cytoplasm ) - 37.788059 -> hsa:3265( HRAS , cytoplasm ) - 22.582651 -> hsa:5894( RAF1 , cytoplasm ) - 3.307865 -> hsa:5595( MAPK3 , nucleus ) - 3.032210 -> hsa:6667( SP1 , nucleus ) - 4.506367 -> hsa:5371( PML , nucleus ) - 5.177529 -> hsa:1432( MAPK14 , cytoplasm ) - 4.410487 -> hsa:10891( PPARGC1A , nucleus ) | 14 | 11.096696 |
| hsa:2161( F12 , extracellular ) - 35.283898 -> hsa:3848( KRT1 , cytoplasm ) - 4.935545 -> hsa:7082( TJP1 , cytoplasm )<br>- 2.467773 -> hsa:5339( PLECL1 , cytoplasm ) - 10.282386 -> hsa:6709( SPTAN1 , cytoplasm ) - 4.935545 -> hsa:10006( ABI1 , cytoplasm ) - 5.546739 -> hsa:6654( SOS1 , cytoplasm ) - 37.788059 -> hsa:3265( HRAS , cytoplasm ) - 22.582651 -> hsa:5894( RAF1 , cytoplasm ) - 3.307865 -> hsa:5595( MAPK3 , nucleus ) - 3.032210 -> hsa:6667( SP1 , nucleus ) - 4.506367 -> hsa:672( BRCA1 , nucleus ) - 5.177529 -> hsa:207( AKT1 , cytoplasm ) - 4.410487 -> hsa:3164( NR4A1 , nucleus )       | 14 | 11.096696 |
| hsa:2688( unknown , extracellular ) - 21.536925 -> hsa:2690( GHR , plasma membrane ) - 2.640565 -> hsa:7297( TYK2 , cytoplasm ) - 9.046826 -> hsa:6772( STAT1 , nucleus )                                                                                                                                                                                                                                                                                                                                                                                                                                                | 4  | 11.074772 |
| hsa:2689( GH2 , extracellular ) - 21.536925 -> hsa:2690( GHR , plasma membrane ) - 2.640565 -> hsa:7297( TYK2 , cytoplasm ) - 9.046826 -> hsa:6772( STAT1 , nucleus )                                                                                                                                                                                                                                                                                                                                                                                                                                                    | 4  | 11.074772 |
| hsa:1442( unknown , extracellular ) - 21.536925 -> hsa:5618( PRLR , extracellular ) - 2.640565 -> hsa:3717( JAK2 , cytoplasm ) - 9.046825 -> hsa:6772( STAT1 , nucleus )                                                                                                                                                                                                                                                                                                                                                                                                                                                 | 4  | 11.074772 |
| hsa:5617( PRL , extracellular ) - 21.536925 -> hsa:5618( PRLR , extracellular ) - 2.640565 -> hsa:3717( JAK2 , cytoplasm ) - 9.046825 -> hsa:6772( STAT1 , nucleus )                                                                                                                                                                                                                                                                                                                                                                                                                                                     | 4  | 11.074772 |
| hsa:2161( F12 , extracellular ) - 35.283898 -> hsa:3848( KRT1 , cytoplasm ) - 4.935545 -> hsa:7082( TJP1 , cytoplasm )<br>- 2.467773 -> hsa:5339( PLECL1 , cytoplasm ) - 10.282386 -> hsa:6709( SPTAN1 , cytoplasm ) - 4.935545 -> hsa:10006( ABI1 , cytoplasm )                                                                                                                                                                                                                                                                                                                                                         | 13 | 11.068011 |



|                                                                                                                                                                                                                                                                                                                                                                                                                                                                                                                                                                                                              |    |           |
|--------------------------------------------------------------------------------------------------------------------------------------------------------------------------------------------------------------------------------------------------------------------------------------------------------------------------------------------------------------------------------------------------------------------------------------------------------------------------------------------------------------------------------------------------------------------------------------------------------------|----|-----------|
| cytoplasm ) - 5.546739 -> hsa:6654( SOS1 , cytoplasm ) - 37.788059 -> hsa:6237( RRAS , cytoplasm ) - 2.145471 -> hsa:2048( EPHB2 , cytoplasm ) - 3.040261 -> hsa:5921( RASAI , cytoplasm ) - 18.854384 -> hsa:5906( RAPIA , cytoplasm ) - 2.145471 -> hsa:5566( PRKACA730418 , cytoplasm ) - 5.390596 -> hsa:466( ATF1 , nucleus )                                                                                                                                                                                                                                                                           |    |           |
| hsa:9965( FGF19 , extracellular ) - 14.093896 -> hsa:2264( FGFR4 , cytoplasm ) - 2.431625 -> hsa:5335( PLCG1 , cytoplasm ) - 20.265953 -> hsa:387( RHOA , cytoplasm ) - 2.145471 -> hsa:5578( PRKCA , cytoplasm ) - 16.171787 -> hsa:7157( TP53 , nucleus )                                                                                                                                                                                                                                                                                                                                                  | 6  | 11.021746 |
| hsa:2255( FGF10 , extracellular ) - 14.093896 -> hsa:2263( FGFR2 , cytoplasm ) - 2.431625 -> hsa:5335( PLCG1 , cytoplasm ) - 20.265953 -> hsa:387( RHOA , cytoplasm ) - 2.145471 -> hsa:5578( PRKCA , cytoplasm ) - 16.171787 -> hsa:7157( TP53 , nucleus )                                                                                                                                                                                                                                                                                                                                                  | 6  | 11.021746 |
| hsa:2161( F12 , extracellular ) - 35.283898 -> hsa:3848( KRT1 , cytoplasm ) - 4.935545 -> hsa:7082( TJP1 , cytoplasm ) - 2.467773 -> hsa:5339( PLEC1 , cytoplasm ) - 10.282386 -> hsa:6709( SPTAN1 , cytoplasm ) - 4.935545 -> hsa:10006( ABI1 , cytoplasm ) - 5.546739 -> hsa:6654( SOS1 , cytoplasm ) - 37.788059 -> hsa:3265( HRAS , cytoplasm ) - 3.310522 -> hsa:5584( PRKCI , cytoplasm ) - 3.275625 -> hsa:1147( CHUK , cytoplasm ) - 2.205244 -> hsa:5971( RELB , nucleus )                                                                                                                          | 11 | 11.003134 |
| hsa:2161( F12 , extracellular ) - 35.283898 -> hsa:3848( KRT1 , cytoplasm ) - 4.935545 -> hsa:7082( TJP1 , cytoplasm ) - 2.467773 -> hsa:5339( PLEC1 , cytoplasm ) - 10.282386 -> hsa:6709( SPTAN1 , cytoplasm ) - 4.935545 -> hsa:10006( ABI1 , cytoplasm ) - 5.546739 -> hsa:6654( SOS1 , cytoplasm ) - 37.788059 -> hsa:6237( RRAS , cytoplasm ) - 2.145471 -> hsa:2048( EPHB2 , cytoplasm ) - 2.210683 -> hsa:6714( SRC , cytoplasm ) - 4.410487 -> hsa:2100( ESR2 , nucleus )                                                                                                                           | 11 | 11.000659 |
| hsa:2161( F12 , extracellular ) - 35.283898 -> hsa:3848( KRT1 , cytoplasm ) - 4.935545 -> hsa:7082( TJP1 , cytoplasm ) - 2.467773 -> hsa:5339( PLEC1 , cytoplasm ) - 10.282386 -> hsa:6709( SPTAN1 , cytoplasm ) - 4.935545 -> hsa:10006( ABI1 , cytoplasm ) - 5.546739 -> hsa:6654( SOS1 , cytoplasm ) - 37.788059 -> hsa:6237( RRAS , cytoplasm ) - 2.145471 -> hsa:2048( EPHB2 , cytoplasm ) - 2.210683 -> hsa:6714( SRC , cytoplasm ) - 4.410487 -> hsa:5241( PGR , nucleus )                                                                                                                            | 11 | 11.000659 |
| hsa:2161( F12 , extracellular ) - 35.283898 -> hsa:3848( KRT1 , cytoplasm ) - 4.935545 -> hsa:7082( TJP1 , cytoplasm ) - 2.467773 -> hsa:5339( PLEC1 , cytoplasm ) - 10.282386 -> hsa:6709( SPTAN1 , cytoplasm ) - 4.935545 -> hsa:10006( ABI1 , cytoplasm ) - 5.546739 -> hsa:6654( SOS1 , cytoplasm ) - 37.788059 -> hsa:6237( RRAS , cytoplasm ) - 2.145471 -> hsa:2048( EPHB2 , cytoplasm ) - 2.210683 -> hsa:6714( SRC , cytoplasm ) - 4.410487 -> hsa:5467( PPARD , nucleus )                                                                                                                          | 11 | 11.000659 |
| hsa:1440( CSF3 , extracellular ) - 21.536925 -> hsa:1441( CSF3R , extracellular ) - 2.640565 -> hsa:6850( SYK , cytoplasm ) - 8.820974 -> hsa:7314( UBB , nucleus )                                                                                                                                                                                                                                                                                                                                                                                                                                          | 4  | 10.999488 |
| hsa:2161( F12 , extracellular ) - 35.283898 -> hsa:3848( KRT1 , cytoplasm ) - 4.935545 -> hsa:7082( TJP1 , cytoplasm ) - 2.467773 -> hsa:5339( PLEC1 , cytoplasm ) - 10.282386 -> hsa:6709( SPTAN1 , cytoplasm ) - 4.935545 -> hsa:10006( ABI1 , cytoplasm ) - 5.546739 -> hsa:6654( SOS1 , cytoplasm ) - 37.788059 -> hsa:3265( HRAS , cytoplasm ) - 2.145471 -> hsa:5590( PRKCZ , cytoplasm ) - 3.717411 -> hsa:11033( CENTA1 , cytoplasm ) - 2.089730 -> hsa:5578( PRKCA , cytoplasm ) - 4.410487 -> hsa:2130( EWSR1 , nucleus ) - 18.025470 -> hsa:6297( SALL2 , nucleus )                               | 13 | 10.969043 |
| hsa:2161( F12 , extracellular ) - 35.283898 -> hsa:3848( KRT1 , cytoplasm ) - 4.935545 -> hsa:7082( TJP1 , cytoplasm ) - 2.467773 -> hsa:5339( PLEC1 , cytoplasm ) - 10.282386 -> hsa:6709( SPTAN1 , cytoplasm ) - 4.935545 -> hsa:10006( ABI1 , cytoplasm ) - 5.546739 -> hsa:6654( SOS1 , cytoplasm ) - 37.788059 -> hsa:3265( HRAS , cytoplasm ) - 2.145471 -> hsa:3643( INSR , endoplasmic reticulum ) - 3.041705 -> hsa:2888( GRB14 , cytoplasm ) - 3.230539 -> hsa:80351( TNKS2 , nucleus )                                                                                                            | 11 | 10.965766 |
| hsa:2161( F12 , extracellular ) - 35.283898 -> hsa:3848( KRT1 , cytoplasm ) - 4.935545 -> hsa:7082( TJP1 , cytoplasm ) - 2.467773 -> hsa:5339( PLEC1 , cytoplasm ) - 10.282386 -> hsa:6709( SPTAN1 , cytoplasm ) - 4.935545 -> hsa:10006( ABI1 , cytoplasm ) - 5.546739 -> hsa:6654( SOS1 , cytoplasm ) - 37.788059 -> hsa:3265( HRAS , cytoplasm ) - 22.582651 -> hsa:5894( RAF1 , cytoplasm ) - 3.307865 -> hsa:5595( MAPK3 , nucleus ) - 3.032210 -> hsa:6667( SPI , nucleus ) - 4.506367 -> hsa:672( BRCA1 , nucleus ) - 5.177529 -> hsa:983( CDC2 , nucleus ) - 2.205244 -> hsa:8900( CCNA1 , nucleus ) | 14 | 10.927062 |
| hsa:2161( F12 , extracellular ) - 35.283898 -> hsa:3848( KRT1 , cytoplasm ) - 4.935545 -> hsa:7082( TJP1 , cytoplasm ) - 2.467773 -> hsa:5339( PLEC1 , cytoplasm ) - 10.282386 -> hsa:6709( SPTAN1 , cytoplasm ) - 4.935545 -> hsa:10006( ABI1 , cytoplasm )                                                                                                                                                                                                                                                                                                                                                 | 14 | 10.927062 |

|                                                                                                                                                                                                                                                                                                                                                                                                                                                                                                                                                                                                                  |    |           |
|------------------------------------------------------------------------------------------------------------------------------------------------------------------------------------------------------------------------------------------------------------------------------------------------------------------------------------------------------------------------------------------------------------------------------------------------------------------------------------------------------------------------------------------------------------------------------------------------------------------|----|-----------|
| cytoplasm ) - 5.546739 -> hsa:6654( SOS1 , cytoplasm ) - 37.788059 -> hsa:3265( HRAS , cytoplasm ) - 22.582651 -> hsa:5894( RAF1 , cytoplasm ) - 3.307865 -> hsa:5595( MAPK3 , nucleus ) - 3.032210 -> hsa:6667( SP1 , nucleus ) - 4.506367 -> hsa:672( BRCA1 , nucleus ) - 5.177529 -> hsa:983( CDC2 , nucleus ) - 2.205244 -> hsa:898( CCNE1 , nucleus )                                                                                                                                                                                                                                                       |    |           |
| hsa:2161( F12 , extracellular ) - 35.283898 -> hsa:3848( KRT1 , cytoplasm ) - 4.935545 -> hsa:7082( TJP1 , cytoplasm ) - 2.467773 -> hsa:5339( PLEC1 , cytoplasm ) - 10.282386 -> hsa:6709( SPTAN1 , cytoplasm ) - 4.935545 -> hsa:10006( ABI1 , cytoplasm ) - 5.546739 -> hsa:6654( SOS1 , cytoplasm ) - 37.788059 -> hsa:3265( HRAS , cytoplasm ) - 22.582651 -> hsa:5894( RAF1 , cytoplasm ) - 3.307865 -> hsa:5595( MAPK3 , nucleus ) - 3.032210 -> hsa:6667( SP1 , nucleus ) - 4.506367 -> hsa:672( BRCA1 , nucleus ) - 5.177529 -> hsa:1017( CDK2 , cytoplasm ) - 2.205244 -> hsa:902( CCNH , nucleus )    | 14 | 10.927062 |
| hsa:2161( F12 , extracellular ) - 35.283898 -> hsa:3848( KRT1 , cytoplasm ) - 4.935545 -> hsa:7082( TJP1 , cytoplasm ) - 2.467773 -> hsa:5339( PLEC1 , cytoplasm ) - 10.282386 -> hsa:6709( SPTAN1 , cytoplasm ) - 4.935545 -> hsa:10006( ABI1 , cytoplasm ) - 5.546739 -> hsa:6654( SOS1 , cytoplasm ) - 37.788059 -> hsa:3265( HRAS , cytoplasm ) - 22.582651 -> hsa:5894( RAF1 , cytoplasm ) - 3.307865 -> hsa:5595( MAPK3 , nucleus ) - 3.032210 -> hsa:6667( SP1 , nucleus ) - 4.506367 -> hsa:672( BRCA1 , nucleus ) - 5.177529 -> hsa:1017( CDK2 , cytoplasm ) - 2.205244 -> hsa:8812( CCNK , nucleus )   | 14 | 10.927062 |
| hsa:2161( F12 , extracellular ) - 35.283898 -> hsa:3848( KRT1 , cytoplasm ) - 4.935545 -> hsa:7082( TJP1 , cytoplasm ) - 2.467773 -> hsa:5339( PLEC1 , cytoplasm ) - 10.282386 -> hsa:6709( SPTAN1 , cytoplasm ) - 4.935545 -> hsa:10006( ABI1 , cytoplasm ) - 5.546739 -> hsa:6654( SOS1 , cytoplasm ) - 37.788059 -> hsa:3265( HRAS , cytoplasm ) - 22.582651 -> hsa:5894( RAF1 , cytoplasm ) - 3.307865 -> hsa:5595( MAPK3 , nucleus ) - 3.032210 -> hsa:6667( SP1 , nucleus ) - 4.506367 -> hsa:672( BRCA1 , nucleus ) - 5.177529 -> hsa:1017( CDK2 , cytoplasm ) - 2.205244 -> hsa:9134( CCNE2 , nucleus )  | 14 | 10.927062 |
| hsa:2161( F12 , extracellular ) - 35.283898 -> hsa:3848( KRT1 , cytoplasm ) - 4.935545 -> hsa:7082( TJP1 , cytoplasm ) - 2.467773 -> hsa:5339( PLEC1 , cytoplasm ) - 10.282386 -> hsa:6709( SPTAN1 , cytoplasm ) - 4.935545 -> hsa:10006( ABI1 , cytoplasm ) - 5.546739 -> hsa:6654( SOS1 , cytoplasm ) - 37.788059 -> hsa:3265( HRAS , cytoplasm ) - 22.582651 -> hsa:5894( RAF1 , cytoplasm ) - 3.307865 -> hsa:5595( MAPK3 , nucleus ) - 3.032210 -> hsa:6667( SP1 , nucleus ) - 4.506367 -> hsa:672( BRCA1 , nucleus ) - 5.177529 -> hsa:1017( CDK2 , cytoplasm ) - 2.205244 -> hsa:85417( CCNB3 , nucleus ) | 14 | 10.927062 |
| hsa:2161( F12 , extracellular ) - 35.283898 -> hsa:3848( KRT1 , cytoplasm ) - 4.935545 -> hsa:7082( TJP1 , cytoplasm ) - 2.467773 -> hsa:5339( PLEC1 , cytoplasm ) - 10.282386 -> hsa:6709( SPTAN1 , cytoplasm ) - 4.935545 -> hsa:10006( ABI1 , cytoplasm ) - 5.546739 -> hsa:6654( SOS1 , cytoplasm ) - 37.788059 -> hsa:6237( RRAS , cytoplasm ) - 2.145471 -> hsa:2048( EPHB2 , cytoplasm ) - 3.040261 -> hsa:5921( RASA1 , cytoplasm ) - 18.854384 -> hsa:5906( RAPIA , cytoplasm ) - 2.145471 -> hsa:5566( PRKACA730418 , cytoplasm ) - 3.032210 -> hsa:10661( KLF1 , nucleus )                            | 13 | 10.871479 |
| hsa:2161( F12 , extracellular ) - 35.283898 -> hsa:3848( KRT1 , cytoplasm ) - 4.935545 -> hsa:7082( TJP1 , cytoplasm ) - 2.467773 -> hsa:5339( PLEC1 , cytoplasm ) - 10.282386 -> hsa:6709( SPTAN1 , cytoplasm ) - 4.935545 -> hsa:10006( ABI1 , cytoplasm ) - 5.546739 -> hsa:6654( SOS1 , cytoplasm ) - 37.788059 -> hsa:6237( RRAS , cytoplasm ) - 2.145471 -> hsa:2048( EPHB2 , cytoplasm ) - 3.040261 -> hsa:5921( RASA1 , cytoplasm ) - 18.854384 -> hsa:5906( RAPIA , cytoplasm ) - 2.145471 -> hsa:5566( PRKACA730418 , cytoplasm ) - 2.205244 -> hsa:595( CCND1 , nucleus )                             | 13 | 10.802565 |
| hsa:3569( IL6 , extracellular ) - 21.536925 -> hsa:3572( IL6ST , extracellular ) - 2.019617 -> hsa:2064( ERBB2 , cytoplasm ) - 8.820974 -> hsa:7314( UBB , nucleus )                                                                                                                                                                                                                                                                                                                                                                                                                                             | 4  | 10.792505 |
| hsa:2161( F12 , extracellular ) - 35.283898 -> hsa:3848( KRT1 , cytoplasm ) - 4.935545 -> hsa:7082( TJP1 , cytoplasm ) - 2.467773 -> hsa:5339( PLEC1 , cytoplasm ) - 10.282386 -> hsa:6709( SPTAN1 , cytoplasm ) - 4.935545 -> hsa:10006( ABI1 , cytoplasm ) - 5.546739 -> hsa:6654( SOS1 , cytoplasm ) - 37.788059 -> hsa:6237( RRAS , cytoplasm ) - 2.145471 -> hsa:2048( EPHB2 , cytoplasm ) - 2.210683 -> hsa:25( ABL129892 , cytoplasm ) - 2.205244 -> hsa:91768( CABLES1 , nucleus )                                                                                                                       | 11 | 10.780134 |
| hsa:2161( F12 , extracellular ) - 35.283898 -> hsa:3848( KRT1 , cytoplasm ) - 4.935545 -> hsa:7082( TJP1 , cytoplasm )                                                                                                                                                                                                                                                                                                                                                                                                                                                                                           | 11 | 10.780134 |

|                                                                                                                                                                                                                                                                                                                                                                                                                                                                                                                                                                                             |    |           |
|---------------------------------------------------------------------------------------------------------------------------------------------------------------------------------------------------------------------------------------------------------------------------------------------------------------------------------------------------------------------------------------------------------------------------------------------------------------------------------------------------------------------------------------------------------------------------------------------|----|-----------|
| - 2.467773 -> hsa:5339( PLEC1 , cytoplasm ) - 10.282386 -> hsa:6709( SPTAN1 , cytoplasm ) - 4.935545 -> hsa:10006( ABI1 , cytoplasm ) - 5.546739 -> hsa:6654( SOS1 , cytoplasm ) - 37.788059 -> hsa:6237( RRAS , cytoplasm ) - 2.145471 -> hsa:2048( EPHB2 , cytoplasm ) - 2.210683 -> hsa:25( ABL129892 , cytoplasm ) - 2.205244 -> hsa:81928( CABLES2 , nucleus )                                                                                                                                                                                                                         |    |           |
| hsa:64218( SEMA4A , extracellular ) - 10.109938 -> hsa:5364( PLXNB1 , extracellular ) - 14.637223 -> hsa:5879( RAC1 , golgi ) - 2.145471 -> hsa:5578( PRKCA , cytoplasm ) - 16.171787 -> hsa:7157( TP53 , nucleus )                                                                                                                                                                                                                                                                                                                                                                         | 5  | 10.766105 |
| hsa:10509( SEMA4B , extracellular ) - 10.109938 -> hsa:5364( PLXNB1 , extracellular ) - 14.637223 -> hsa:5879( RAC1 , golgi ) - 2.145471 -> hsa:5578( PRKCA , cytoplasm ) - 16.171787 -> hsa:7157( TP53 , nucleus )                                                                                                                                                                                                                                                                                                                                                                         | 5  | 10.766105 |
| hsa:3977( LIFR , extracellular ) - 4.307385 -> hsa:5335( PLCG1 , cytoplasm ) - 20.265953 -> hsa:387( RHOA , cytoplasm ) - 2.145471 -> hsa:5578( PRKCA , cytoplasm ) - 16.171787 -> hsa:7157( TP53 , nucleus )                                                                                                                                                                                                                                                                                                                                                                               | 5  | 10.722649 |
| hsa:84033( OBSCN , extracellular ) - 6.768748 -> hsa:801( unknown , cytoplasm ) - 17.727673 -> hsa:6236( RRAD , cytoplasm ) - 2.145471 -> hsa:5578( PRKCA , cytoplasm ) - 16.171787 -> hsa:7157( TP53 , nucleus )                                                                                                                                                                                                                                                                                                                                                                           | 5  | 10.70342  |
| hsa:2161( F12 , extracellular ) - 35.283898 -> hsa:3848( KRT1 , cytoplasm ) - 4.935545 -> hsa:7082( TJP1 , cytoplasm ) - 2.467773 -> hsa:5339( PLEC1 , cytoplasm ) - 10.282386 -> hsa:6709( SPTAN1 , cytoplasm ) - 4.935545 -> hsa:10006( ABI1 , cytoplasm ) - 5.546739 -> hsa:6654( SOS1 , cytoplasm ) - 37.788059 -> hsa:3265( HRAS , cytoplasm ) - 2.145471 -> hsa:5590( PRKCZ , cytoplasm ) - 4.932782 -> hsa:5894( RAF1 , cytoplasm ) - 3.307865 -> hsa:5594( MAPK1 , cytoplasm ) - 2.520278 -> hsa:8202( NCOA3 , nucleus )                                                            | 12 | 10.37694  |
| hsa:80031( SEMA6D , extracellular ) - 10.109938 -> hsa:5361( PLXNA1 , extracellular ) - 2.493749 -> hsa:207( AKT1 , cytoplasm ) - 18.468916 -> hsa:3064( HD , nucleus )                                                                                                                                                                                                                                                                                                                                                                                                                     | 4  | 10.357534 |
| hsa:10507( SEMA4D , extracellular ) - 8.303179 -> hsa:5364( PLXNB1 , extracellular ) - 14.637223 -> hsa:5879( RAC1 , golgi ) - 2.145471 -> hsa:5578( PRKCA , cytoplasm ) - 16.171787 -> hsa:7157( TP53 , nucleus )                                                                                                                                                                                                                                                                                                                                                                          | 5  | 10.314415 |
| hsa:2161( F12 , extracellular ) - 35.283898 -> hsa:3848( KRT1 , cytoplasm ) - 4.935545 -> hsa:7082( TJP1 , cytoplasm ) - 2.467773 -> hsa:5339( PLEC1 , cytoplasm ) - 10.282386 -> hsa:6709( SPTAN1 , cytoplasm ) - 4.935545 -> hsa:10006( ABI1 , cytoplasm ) - 5.546739 -> hsa:6654( SOS1 , cytoplasm ) - 37.788059 -> hsa:6237( RRAS , cytoplasm ) - 2.145471 -> hsa:2048( EPHB2 , cytoplasm ) - 2.424963 -> hsa:4690( NCK1 , cytoplasm ) - 5.127839 -> hsa:7454( WAS , cytoplasm ) - 7.217161 -> hsa:1457( CSNK2A1 , cytoplasm ) - 5.390596 -> hsa:2353( FOS , nucleus )                  | 13 | 10.295498 |
| hsa:2161( F12 , extracellular ) - 35.283898 -> hsa:3848( KRT1 , cytoplasm ) - 4.935545 -> hsa:7082( TJP1 , cytoplasm ) - 2.467773 -> hsa:5339( PLEC1 , cytoplasm ) - 10.282386 -> hsa:6709( SPTAN1 , cytoplasm ) - 4.935545 -> hsa:10006( ABI1 , cytoplasm ) - 5.546739 -> hsa:6654( SOS1 , cytoplasm ) - 37.788059 -> hsa:6237( RRAS , cytoplasm ) - 2.145471 -> hsa:2048( EPHB2 , cytoplasm ) - 2.424963 -> hsa:4690( NCK1 , cytoplasm ) - 5.127839 -> hsa:7454( WAS , cytoplasm ) - 7.217161 -> hsa:1459( CSNK2A2 , cytoplasm ) - 5.390596 -> hsa:466( ATF1 , nucleus )                  | 13 | 10.295498 |
| hsa:10718( NRG3 , extracellular ) - 20.106633 -> hsa:2066( ERBB4 , cytoplasm ) - 2.071011 -> hsa:6464( SHC1 , cytoplasm ) - 2.563870 -> hsa:5578( PRKCA , cytoplasm ) - 16.171787 -> hsa:7157( TP53 , nucleus )                                                                                                                                                                                                                                                                                                                                                                             | 5  | 10.228325 |
| hsa:145957( NRG4 , extracellular ) - 20.106633 -> hsa:2066( ERBB4 , cytoplasm ) - 2.071011 -> hsa:6464( SHC1 , cytoplasm ) - 2.563870 -> hsa:5578( PRKCA , cytoplasm ) - 16.171787 -> hsa:7157( TP53 , nucleus )                                                                                                                                                                                                                                                                                                                                                                            | 5  | 10.228325 |
| hsa:2161( F12 , extracellular ) - 35.283898 -> hsa:3848( KRT1 , cytoplasm ) - 4.935545 -> hsa:7082( TJP1 , cytoplasm ) - 2.467773 -> hsa:5339( PLEC1 , cytoplasm ) - 10.282386 -> hsa:6709( SPTAN1 , cytoplasm ) - 4.935545 -> hsa:10006( ABI1 , cytoplasm ) - 5.546739 -> hsa:6654( SOS1 , cytoplasm ) - 37.788059 -> hsa:6237( RRAS , cytoplasm ) - 2.145471 -> hsa:2048( EPHB2 , cytoplasm ) - 2.424963 -> hsa:2885( GRB2 , cytoplasm ) - 5.127839 -> hsa:7454( WAS , cytoplasm ) - 7.217161 -> hsa:1457( CSNK2A1 , cytoplasm ) - 4.410487 -> hsa:3183( HNRNPC , nucleus )               | 13 | 10.213822 |
| hsa:2161( F12 , extracellular ) - 35.283898 -> hsa:3848( KRT1 , cytoplasm ) - 4.935545 -> hsa:7082( TJP1 , cytoplasm ) - 2.467773 -> hsa:5339( PLEC1 , cytoplasm ) - 10.282386 -> hsa:6709( SPTAN1 , cytoplasm ) - 4.935545 -> hsa:10006( ABI1 , cytoplasm ) - 5.546739 -> hsa:6654( SOS1 , cytoplasm ) - 37.788059 -> hsa:3265( HRAS , cytoplasm ) - 2.145471 -> hsa:3643( INSR , endoplasmic reticulum ) - 2.424963 -> hsa:1399( CRKL , cytoplasm ) - 5.127839 -> hsa:7454( WAS , cytoplasm ) - 7.217161 -> hsa:1457( CSNK2A1 , cytoplasm ) - 4.410487 -> hsa:3181( HNRNPA2B1 , nucleus ) | 13 | 10.213822 |

|                                                                                                                                                                                                                                                                                                                                                                                                                                                                                                                                                                                                    |    |           |
|----------------------------------------------------------------------------------------------------------------------------------------------------------------------------------------------------------------------------------------------------------------------------------------------------------------------------------------------------------------------------------------------------------------------------------------------------------------------------------------------------------------------------------------------------------------------------------------------------|----|-----------|
| <p>hsa:2161(F12, extracellular) - 35.283898 -&gt; hsa:3848(KRT1, cytoplasm) - 4.935545 -&gt; hsa:7082(TJPI, cytoplasm)<br/> - 2.467773 -&gt; hsa:5339(PLEC1, cytoplasm) - 10.282386 -&gt; hsa:6709(SPTAN1, cytoplasm) - 4.935545 -&gt; hsa:10006(ABI1, cytoplasm) - 5.546739 -&gt; hsa:6654(SOS1, cytoplasm) - 37.788059 -&gt; hsa:6237(RRAS, cytoplasm) - 2.145471 -&gt; hsa:2048(EPHB2, cytoplasm) - 2.424963 -&gt; hsa:2885(GRB2, cytoplasm) - 5.127839 -&gt; hsa:7454(WAS, cytoplasm) - 7.217161 -&gt; hsa:1457(CSNK2A1, cytoplasm) - 4.410487 -&gt; hsa:3181(HNRNPA2B1, nucleus)</p>          | 13 | 10.213822 |
| <p>hsa:2161(F12, extracellular) - 35.283898 -&gt; hsa:3848(KRT1, cytoplasm) - 4.935545 -&gt; hsa:7082(TJPI, cytoplasm)<br/> - 2.467773 -&gt; hsa:5339(PLEC1, cytoplasm) - 10.282386 -&gt; hsa:6709(SPTAN1, cytoplasm) - 4.935545 -&gt; hsa:10006(ABI1, cytoplasm) - 5.546739 -&gt; hsa:6654(SOS1, cytoplasm) - 37.788059 -&gt; hsa:6237(RRAS, cytoplasm) - 2.145471 -&gt; hsa:2048(EPHB2, cytoplasm) - 2.424963 -&gt; hsa:2885(GRB2, cytoplasm) - 3.776765 -&gt; hsa:2017(CTTN, cytoplasm) - 2.692116 -&gt; hsa:55139(ANKZF1, nucleus)</p>                                                         | 12 | 10.207205 |
| <p>hsa:2161(F12, extracellular) - 35.283898 -&gt; hsa:3848(KRT1, cytoplasm) - 4.935545 -&gt; hsa:7082(TJPI, cytoplasm)<br/> - 2.467773 -&gt; hsa:5339(PLEC1, cytoplasm) - 10.282386 -&gt; hsa:6709(SPTAN1, cytoplasm) - 4.935545 -&gt; hsa:10006(ABI1, cytoplasm) - 5.546739 -&gt; hsa:6654(SOS1, cytoplasm) - 37.788059 -&gt; hsa:6237(RRAS, cytoplasm) - 2.145471 -&gt; hsa:2048(EPHB2, cytoplasm) - 2.424963 -&gt; hsa:2885(GRB2, cytoplasm) - 5.127839 -&gt; hsa:7454(WAS, cytoplasm) - 7.217161 -&gt; hsa:1457(CSNK2A1, cytoplasm) - 4.211403 -&gt; hsa:1386(ATF2, nucleus)</p>               | 13 | 10.197232 |
| <p>hsa:2161(F12, extracellular) - 35.283898 -&gt; hsa:3848(KRT1, cytoplasm) - 4.935545 -&gt; hsa:7082(TJPI, cytoplasm)<br/> - 2.467773 -&gt; hsa:5339(PLEC1, cytoplasm) - 10.282386 -&gt; hsa:6709(SPTAN1, cytoplasm) - 4.935545 -&gt; hsa:10006(ABI1, cytoplasm) - 5.546739 -&gt; hsa:6654(SOS1, cytoplasm) - 37.788059 -&gt; hsa:6237(RRAS, cytoplasm) - 2.145471 -&gt; hsa:2048(EPHB2, cytoplasm) - 2.424963 -&gt; hsa:4690(NCK1, cytoplasm) - 5.127839 -&gt; hsa:7454(WAS, cytoplasm) - 7.217161 -&gt; hsa:1459(CSNK2A2, cytoplasm) - 3.032210 -&gt; hsa:10661(KLF1, nucleus)</p>              | 13 | 10.098966 |
| <p>hsa:2161(F12, extracellular) - 35.283898 -&gt; hsa:3848(KRT1, cytoplasm) - 4.935545 -&gt; hsa:7082(TJPI, cytoplasm)<br/> - 2.467773 -&gt; hsa:5339(PLEC1, cytoplasm) - 10.282386 -&gt; hsa:6709(SPTAN1, cytoplasm) - 4.935545 -&gt; hsa:10006(ABI1, cytoplasm) - 5.546739 -&gt; hsa:6654(SOS1, cytoplasm) - 37.788059 -&gt; hsa:3265(HRAS, cytoplasm) - 2.145471 -&gt; hsa:3643(INSR, endoplasmic reticulum) - 2.816469 -&gt; hsa:6464(SHC1, cytoplasm) - 2.563870 -&gt; hsa:5578(PRKCA, cytoplasm) - 2.205244 -&gt; hsa:4772(NFATC1, nucleus)</p>                                              | 12 | 10.088273 |
| <p>hsa:2161(F12, extracellular) - 35.283898 -&gt; hsa:3848(KRT1, cytoplasm) - 4.935545 -&gt; hsa:7082(TJPI, cytoplasm)<br/> - 2.467773 -&gt; hsa:5339(PLEC1, cytoplasm) - 10.282386 -&gt; hsa:6709(SPTAN1, cytoplasm) - 4.935545 -&gt; hsa:10006(ABI1, cytoplasm) - 5.546739 -&gt; hsa:6654(SOS1, cytoplasm) - 37.788059 -&gt; hsa:6237(RRAS, cytoplasm) - 2.145471 -&gt; hsa:2048(EPHB2, cytoplasm) - 2.424963 -&gt; hsa:2885(GRB2, cytoplasm) - 5.127839 -&gt; hsa:7454(WAS, cytoplasm) - 7.217161 -&gt; hsa:1457(CSNK2A1, cytoplasm) - 2.520278 -&gt; hsa:3091(HIF1A, nucleus)</p>              | 13 | 10.056305 |
| <p>hsa:5794(PTPRH, extracellular) - 3.888611 -&gt; hsa:5747(PTK2, cytoplasm) - 16.171787 -&gt; hsa:7157(IP53, nucleus)</p>                                                                                                                                                                                                                                                                                                                                                                                                                                                                         | 3  | 10.030199 |
| <p>hsa:2161(F12, extracellular) - 35.283898 -&gt; hsa:3848(KRT1, cytoplasm) - 4.935545 -&gt; hsa:7082(TJPI, cytoplasm)<br/> - 2.467773 -&gt; hsa:5339(PLEC1, cytoplasm) - 10.282386 -&gt; hsa:6709(SPTAN1, cytoplasm) - 4.935545 -&gt; hsa:10006(ABI1, cytoplasm) - 5.546739 -&gt; hsa:6654(SOS1, cytoplasm) - 37.788059 -&gt; hsa:3265(HRAS, cytoplasm) - 2.145471 -&gt; hsa:3643(INSR, endoplasmic reticulum) - 2.816469 -&gt; hsa:5295(PIK3R1, cytoplasm) - 7.622199 -&gt; hsa:1759(DNM1, cytoplasm) - 2.089730 -&gt; hsa:5578(PRKCA, cytoplasm) - 4.410487 -&gt; hsa:5914(RARA, nucleus)</p>   | 13 | 10.027025 |
| <p>hsa:7422(VEGFA, extracellular) - 15.626983 -&gt; hsa:3791(KDR, cytoplasm) - 4.410488 -&gt; hsa:545(ATR, nucleus)</p>                                                                                                                                                                                                                                                                                                                                                                                                                                                                            | 3  | 10.018736 |
| <p>hsa:7423(VEGFB, extracellular) - 15.626983 -&gt; hsa:2321(FLT1, cytoplasm) - 4.410488 -&gt; hsa:545(ATR, nucleus)</p>                                                                                                                                                                                                                                                                                                                                                                                                                                                                           | 3  | 10.018736 |
| <p>hsa:5228(PGF, extracellular) - 15.626983 -&gt; hsa:2321(FLT1, cytoplasm) - 4.410488 -&gt; hsa:545(ATR, nucleus)</p>                                                                                                                                                                                                                                                                                                                                                                                                                                                                             | 3  | 10.018736 |
| <p>hsa:2161(F12, extracellular) - 35.283898 -&gt; hsa:3848(KRT1, cytoplasm) - 4.935545 -&gt; hsa:7082(TJPI, cytoplasm)<br/> - 2.467773 -&gt; hsa:5339(PLEC1, cytoplasm) - 10.282386 -&gt; hsa:6709(SPTAN1, cytoplasm) - 4.935545 -&gt; hsa:10006(ABI1, cytoplasm) - 5.546739 -&gt; hsa:6654(SOS1, cytoplasm) - 37.788059 -&gt; hsa:3265(HRAS, cytoplasm) - 2.145471 -&gt; hsa:3643(INSR, endoplasmic reticulum) - 2.816469 -&gt; hsa:5295(PIK3R1, cytoplasm) - 7.622199 -&gt; hsa:1759(DNM1, cytoplasm) - 2.089730 -&gt; hsa:5578(PRKCA, cytoplasm) - 2.205244 -&gt; hsa:4772(NFATC1, nucleus)</p> | 13 | 9.843255  |

|                                                                                                                                                                                                                                                                                                                                                                                                                                                                                                                                                                                                                         |    |          |
|-------------------------------------------------------------------------------------------------------------------------------------------------------------------------------------------------------------------------------------------------------------------------------------------------------------------------------------------------------------------------------------------------------------------------------------------------------------------------------------------------------------------------------------------------------------------------------------------------------------------------|----|----------|
| hsa:8074( FGF23 , extracellular ) - 14.093896 -> hsa:2261( FGFR3 , cytoplasm ) - 5.390596 -> hsa:467( ATF3 , nucleus )                                                                                                                                                                                                                                                                                                                                                                                                                                                                                                  | 3  | 9.742246 |
| hsa:1951( unknown , extracellular ) - 5.912097 -> hsa:55075( UACA , cytoplasm ) - 13.109432 -> hsa:5966( REL , nucleus )                                                                                                                                                                                                                                                                                                                                                                                                                                                                                                | 3  | 9.510765 |
| hsa:4811( NID1 , extracellular ) - 2.102428 -> hsa:5328( PLAU , extracellular ) - 32.655426 -> hsa:3082( HGF , extracellular ) - 3.247723 -> hsa:4233( MET , cytoplasm ) - 2.071011 -> hsa:6774( STAT3 , nucleus ) - 5.627464 -> hsa:7707( ZNF148 , nucleus )                                                                                                                                                                                                                                                                                                                                                           | 6  | 9.14081  |
| hsa:2161( F12 , extracellular ) - 35.283898 -> hsa:3848( KRT1 , cytoplasm ) - 4.935545 -> hsa:7082( TJPI1 , cytoplasm ) - 2.467773 -> hsa:5339( PLEC1 , cytoplasm ) - 10.282386 -> hsa:6709( SPTAN1 , cytoplasm ) - 4.935545 -> hsa:10006( ABI1 , cytoplasm ) - 5.546739 -> hsa:6654( SOS1 , cytoplasm ) - 37.788059 -> hsa:3265( HRAS , cytoplasm ) - 2.145471 -> hsa:5590( PRKCZ , cytoplasm ) - 3.717411 -> hsa:60312( AFAP1 , cytoplasm ) - 2.089730 -> hsa:5581( PRKCE , cytoplasm ) - 2.339686 -> hsa:5894( RAF1 , cytoplasm ) - 3.307865 -> hsa:5595( MAPK3 , nucleus ) - 3.320395 -> hsa:7553( ZNF7 , nucleus ) | 14 | 9.089269 |
| hsa:3371( TNC , extracellular ) - 9.254424 -> hsa:1956( EGFR , cytoplasm ) - 8.820974 -> hsa:7314( UBB , nucleus )                                                                                                                                                                                                                                                                                                                                                                                                                                                                                                      | 3  | 9.037699 |
| hsa:7424( VEGFC , extracellular ) - 13.168143 -> hsa:3791( KDR , cytoplasm ) - 4.410488 -> hsa:545( ATR , nucleus )                                                                                                                                                                                                                                                                                                                                                                                                                                                                                                     | 3  | 8.789316 |
| hsa:2277( FIGF , extracellular ) - 13.168143 -> hsa:3791( KDR , cytoplasm ) - 4.410488 -> hsa:545( ATR , nucleus )                                                                                                                                                                                                                                                                                                                                                                                                                                                                                                      | 3  | 8.789316 |
| hsa:3688( ITGB1 , extracellular ) - 3.755990 -> hsa:3611( ILK , cytoplasm ) - 13.231462 -> hsa:64210( MMS19 , nucleus )                                                                                                                                                                                                                                                                                                                                                                                                                                                                                                 | 3  | 8.493726 |
| hsa:7057( THBS1 , extracellular ) - 8.129133 -> hsa:3690( ITGB3 , extracellular ) - 3.755990 -> hsa:3611( ILK , cytoplasm ) - 13.231462 -> hsa:64210( MMS19 , nucleus )                                                                                                                                                                                                                                                                                                                                                                                                                                                 | 4  | 8.372195 |
| hsa:3083( HGFAC , extracellular ) - 19.561284 -> hsa:3082( HGF , extracellular ) - 3.247723 -> hsa:4233( MET , cytoplasm ) - 2.071011 -> hsa:6774( STAT3 , nucleus ) - 5.627464 -> hsa:7707( ZNF148 , nucleus )                                                                                                                                                                                                                                                                                                                                                                                                         | 5  | 7.62687  |
| hsa:9542( NRG2 , extracellular ) - 8.950617 -> hsa:2066( ERBB4 , cytoplasm ) - 2.071011 -> hsa:6464( SHC1 , cytoplasm ) - 2.563870 -> hsa:5578( PRKCA , cytoplasm ) - 16.171787 -> hsa:7157( TP53 , nucleus )                                                                                                                                                                                                                                                                                                                                                                                                           | 5  | 7.439321 |
| hsa:3249( HPN , extracellular ) - 17.285546 -> hsa:3082( HGF , extracellular ) - 3.247723 -> hsa:4233( MET , cytoplasm ) - 2.071011 -> hsa:6774( STAT3 , nucleus ) - 5.627464 -> hsa:7707( ZNF148 , nucleus )                                                                                                                                                                                                                                                                                                                                                                                                           | 5  | 7.057936 |
| hsa:5154( PDGFA , extracellular ) - 15.626983 -> hsa:5156( PDGFRA , cytoplasm ) - 2.254387 -> hsa:2888( GRB14 , cytoplasm ) - 3.230539 -> hsa:80351( TNKS2 , nucleus )                                                                                                                                                                                                                                                                                                                                                                                                                                                  | 4  | 7.037303 |
| hsa:5155( PDGFB , extracellular ) - 15.626983 -> hsa:5159( PDGFRB , cytoplasm ) - 2.254387 -> hsa:2888( GRB14 , cytoplasm ) - 3.230539 -> hsa:80351( TNKS2 , nucleus )                                                                                                                                                                                                                                                                                                                                                                                                                                                  | 4  | 7.037303 |
| hsa:80310( PDGFD , extracellular ) - 15.626983 -> hsa:5159( PDGFRB , cytoplasm ) - 2.254387 -> hsa:2888( GRB14 , cytoplasm ) - 3.230539 -> hsa:80351( TNKS2 , nucleus )                                                                                                                                                                                                                                                                                                                                                                                                                                                 | 4  | 7.037303 |
| hsa:56034( PDGFC , extracellular ) - 15.626983 -> hsa:5156( PDGFRA , cytoplasm ) - 2.254387 -> hsa:2888( GRB14 , cytoplasm ) - 3.230539 -> hsa:80351( TNKS2 , nucleus )                                                                                                                                                                                                                                                                                                                                                                                                                                                 | 4  | 7.037303 |
| hsa:5627( PROS1 , extracellular ) - 3.157355 -> hsa:7301( TYRO3 , cytoplasm ) - 2.372382 -> hsa:5295( PIK3R1 , cytoplasm ) - 9.613584 -> hsa:6464( SHC1 , cytoplasm ) - 2.563870 -> hsa:5578( PRKCA , cytoplasm ) - 16.171787 -> hsa:7157( TP53 , nucleus )                                                                                                                                                                                                                                                                                                                                                             | 6  | 6.775796 |
| hsa:80781( COL18A1 , extracellular ) - 8.986096 -> hsa:3791( KDR , cytoplasm ) - 4.410488 -> hsa:545( ATR , nucleus )                                                                                                                                                                                                                                                                                                                                                                                                                                                                                                   | 3  | 6.698292 |
| hsa:2208( FCER2 , extracellular ) - 2.709711 -> hsa:3689( ITGB2 , extracellular ) - 3.755990 -> hsa:3611( ILK , cytoplasm ) - 13.231462 -> hsa:64210( MMS19 , nucleus )                                                                                                                                                                                                                                                                                                                                                                                                                                                 | 4  | 6.565721 |
| hsa:4225( MEPIB , extracellular ) - 9.620916 -> hsa:5566( PRKACA730418 , cytoplasm ) - 3.032210 -> hsa:26993( AKAP8L , nucleus )                                                                                                                                                                                                                                                                                                                                                                                                                                                                                        | 3  | 6.326563 |
| hsa:634( CEACAM1 , extracellular ) - 3.372610 -> hsa:1956( EGFR , cytoplasm ) - 8.820974 -> hsa:7314( UBB , nucleus )                                                                                                                                                                                                                                                                                                                                                                                                                                                                                                   | 3  | 6.096792 |
| hsa:3084( NRG1 , extracellular ) - 3.372610 -> hsa:2064( ERBB2 , cytoplasm ) - 8.820974 -> hsa:7314( UBB , nucleus )                                                                                                                                                                                                                                                                                                                                                                                                                                                                                                    | 3  | 6.096792 |
| hsa:214( ALCAM , extracellular ) - 3.372610 -> hsa:1956( EGFR , cytoplasm ) - 8.820974 -> hsa:7314( UBB , nucleus )                                                                                                                                                                                                                                                                                                                                                                                                                                                                                                     | 3  | 6.096792 |
| hsa:5802( PTPRS , extracellular ) - 3.360153 -> hsa:1956( EGFR , cytoplasm ) - 8.820974 -> hsa:7314( UBB , nucleus )                                                                                                                                                                                                                                                                                                                                                                                                                                                                                                    | 3  | 6.090564 |

|                                                                                                                                                                                                                          |   |          |
|--------------------------------------------------------------------------------------------------------------------------------------------------------------------------------------------------------------------------|---|----------|
| hsa:4036( LRP2 , extracellular ) - 5.912097 -> hsa:57763( ANKRA2 , nucleus )                                                                                                                                             | 2 | 5.912097 |
| hsa:3953( LEPR , extracellular ) - 2.640565 -> hsa:3717( JAK2 , cytoplasm ) - 9.046825 -> hsa:6772( STAT1 , nucleus )                                                                                                    | 3 | 5.843695 |
| hsa:50615( IL21R , extracellular ) - 2.640565 -> hsa:3716( JAK1 , cytoplasm ) - 9.046825 -> hsa:6772( STAT1 , nucleus )                                                                                                  | 3 | 5.843695 |
| hsa:9180( OSMR , extracellular ) - 2.640565 -> hsa:3716( JAK1 , cytoplasm ) - 9.046825 -> hsa:6772( STAT1 , nucleus )                                                                                                    | 3 | 5.843695 |
| hsa:64109( CRLF264109 , extracellular ) - 2.640565 -> hsa:3717( JAK2 , cytoplasm ) - 9.046825 -> hsa:6772( STAT1 , nucleus )                                                                                             | 3 | 5.843695 |
| hsa:3460( IFNGR2 , extracellular ) - 2.640565 -> hsa:3717( JAK2 , cytoplasm ) - 9.046825 -> hsa:6772( STAT1 , nucleus )                                                                                                  | 3 | 5.843695 |
| hsa:3597( IL13RA1 , extracellular ) - 2.640565 -> hsa:7297( TYK2 , cytoplasm ) - 9.046826 -> hsa:6772( STAT1 , nucleus )                                                                                                 | 3 | 5.843695 |
| hsa:3575( IL7R , extracellular ) - 2.640565 -> hsa:4067( LYN , cytoplasm ) - 8.820974 -> hsa:7314( UBB , nucleus )                                                                                                       | 3 | 5.73077  |
| hsa:1438( CSF2RA1438 , extracellular ) - 2.640565 -> hsa:4067( LYN , cytoplasm ) - 8.820974 -> hsa:7314( UBB , nucleus )                                                                                                 | 3 | 5.73077  |
| hsa:5792( PTPRF , extracellular ) - 3.770359 -> hsa:3932( LCK , cytoplasm ) - 6.482107 -> hsa:6772( STAT1 , nucleus )                                                                                                    | 3 | 5.126233 |
| hsa:8506( CNTNAP1 , extracellular ) - 2.744902 -> hsa:5787( PTPRB , extracellular ) - 3.263170 -> hsa:2690( GHR , plasma membrane ) - 2.640565 -> hsa:7297( TYK2 , cytoplasm ) - 9.046826 -> hsa:6772( STAT1 , nucleus ) | 5 | 4.423866 |
| hsa:1439( CSF2RB , extracellular ) - 4.307385 -> hsa:6772( STAT1 , nucleus )                                                                                                                                             | 2 | 4.307385 |
| hsa:3566( IL4R , extracellular ) - 4.307385 -> hsa:6778( STAT6 , nucleus )                                                                                                                                               | 2 | 4.307385 |
| hsa:9466( IL27RA , extracellular ) - 4.307385 -> hsa:6772( STAT1 , nucleus )                                                                                                                                             | 2 | 4.307385 |
| hsa:3595( IL12RB2 , extracellular ) - 4.307385 -> hsa:6775( STAT4 , nucleus )                                                                                                                                            | 2 | 4.307385 |
| hsa:5800( PTPRO , extracellular ) - 4.061489 -> hsa:5292( PIM1 , nucleus ) - 4.410487 -> hsa:1026( CDKN1A , nucleus )                                                                                                    | 3 | 4.235988 |
| hsa:4868( unknown , extracellular ) - 2.304392 -> hsa:8440( NCK2 , cytoplasm ) - 5.384231 -> hsa:3987( LIMS1 , nucleus )                                                                                                 | 3 | 3.844311 |
| hsa:2621( GAS6 , extracellular ) - 3.157355 -> hsa:10461( MERTK , plasma membrane ) - 3.608580 -> hsa:8543( LMO4 , nucleus )                                                                                             | 3 | 3.382967 |
| hsa:5175( PECAMI , extracellular ) - 3.093924 -> hsa:2547( XRCC6 , nucleus )                                                                                                                                             | 2 | 3.093924 |
